# Supplementary material for: Meta-Analysis of Placental Transcriptome Data Identifies a Novel Molecular Pathway Related to Preeclampsia
Source: PubMed Central journal article supplement (PMC4501668; doi:10.1371/journal.pone.0132468), 2015-07-14
Supplement: pone.0132468.s001.pdf [file pone.0132468.s001.pdf]

**INHA**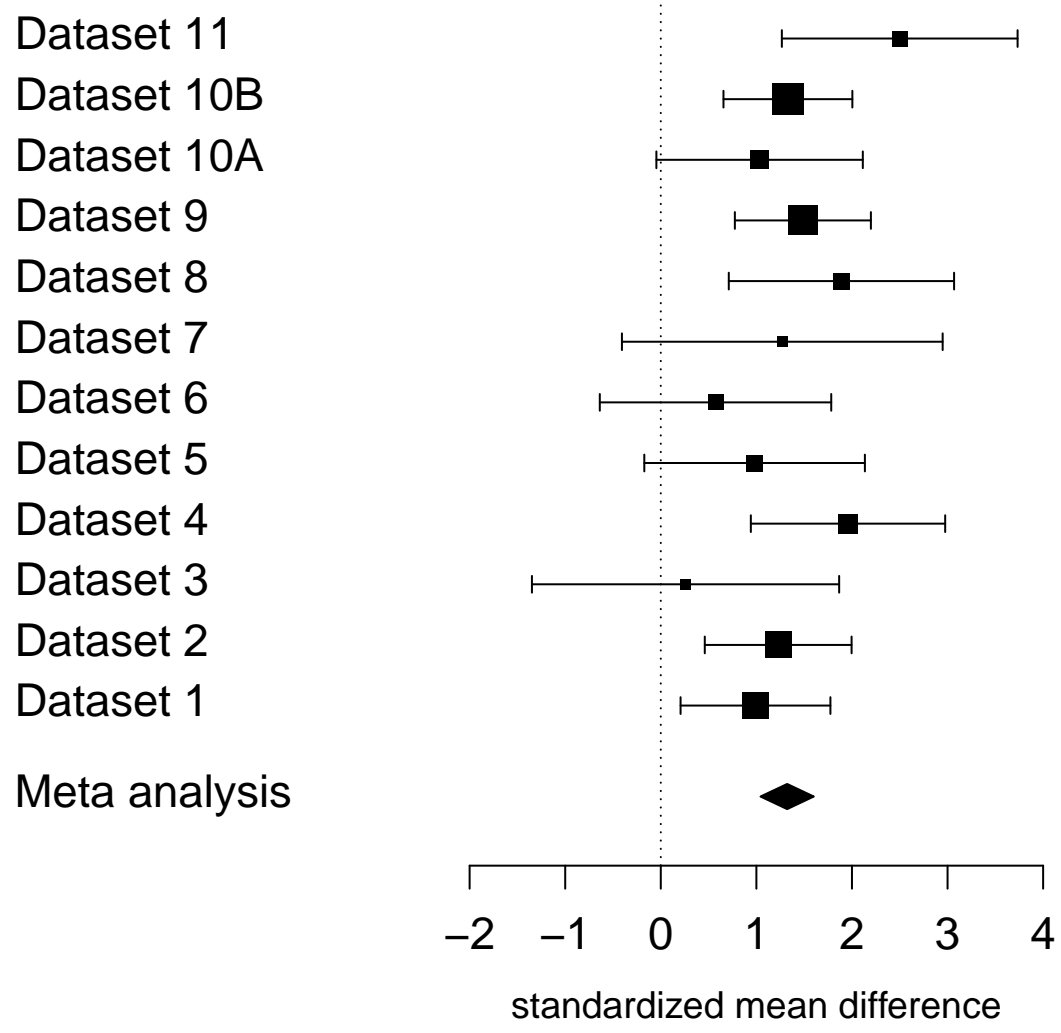**PLA2G16**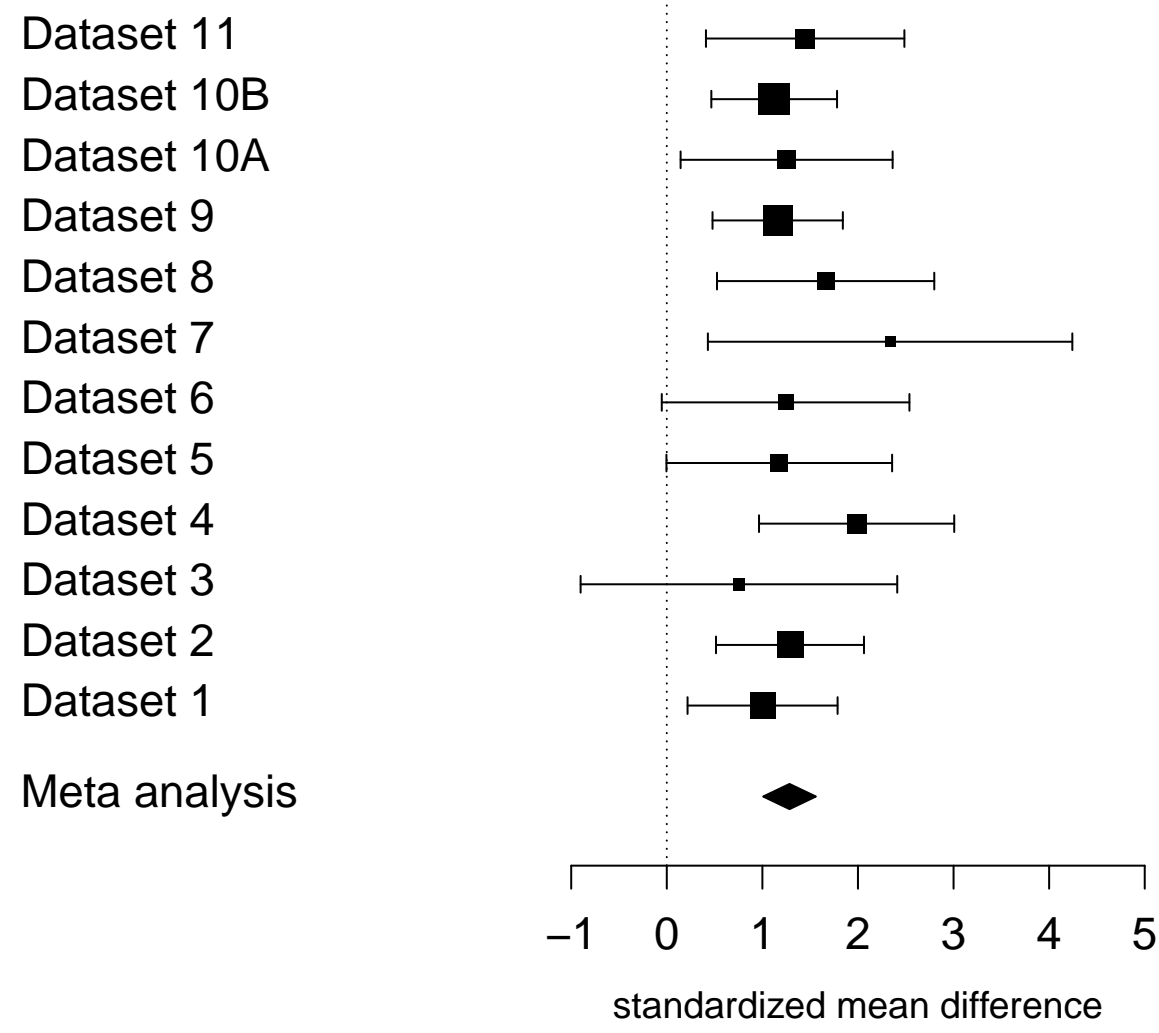**CLDN1**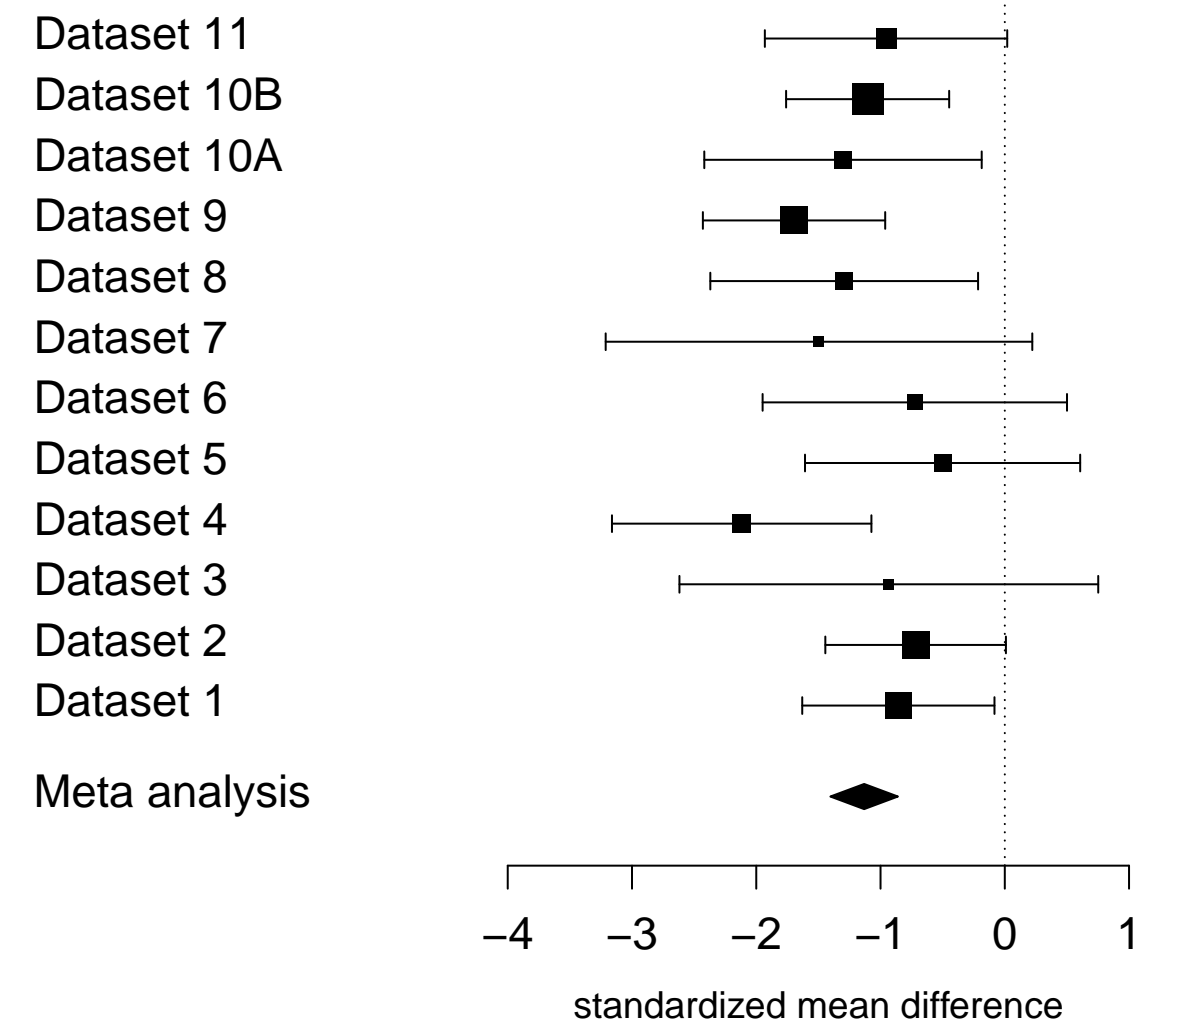**PROCR**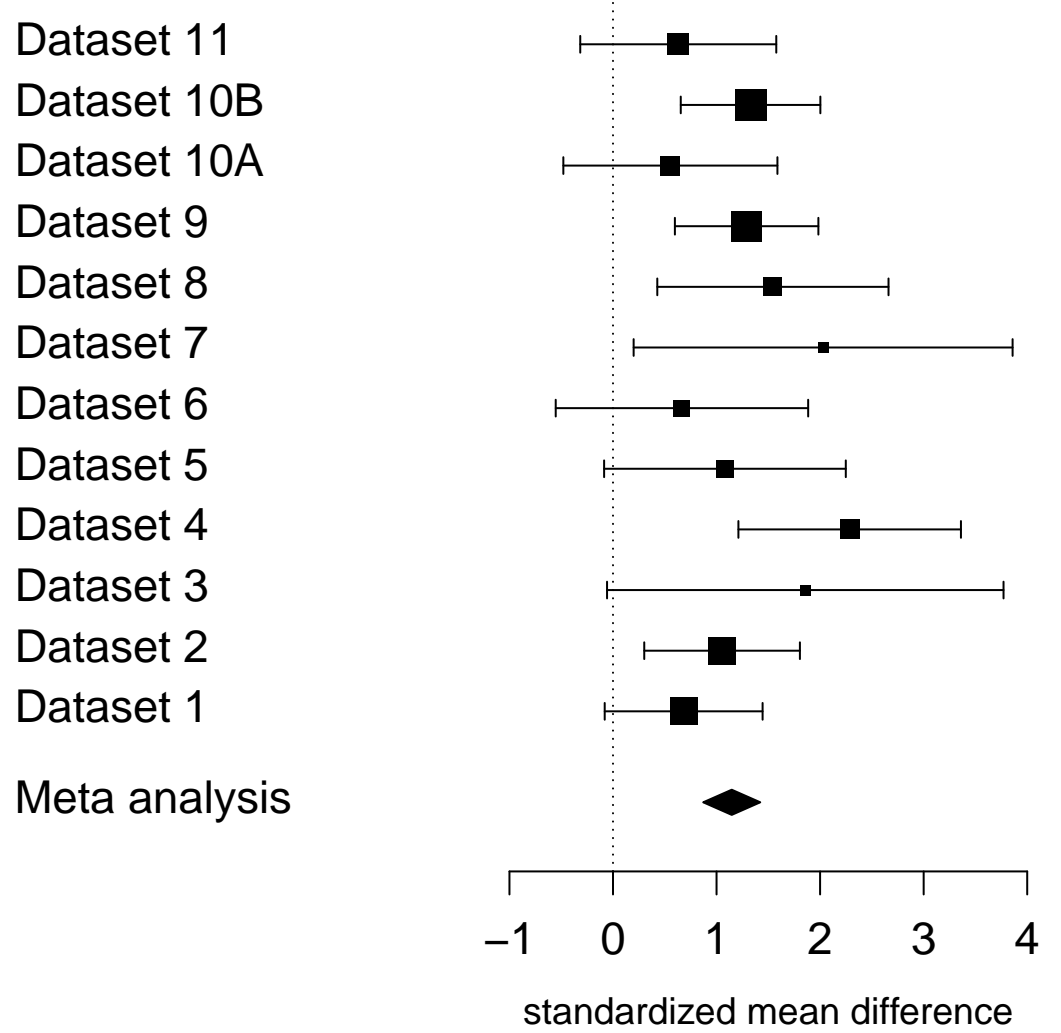**NDRG1**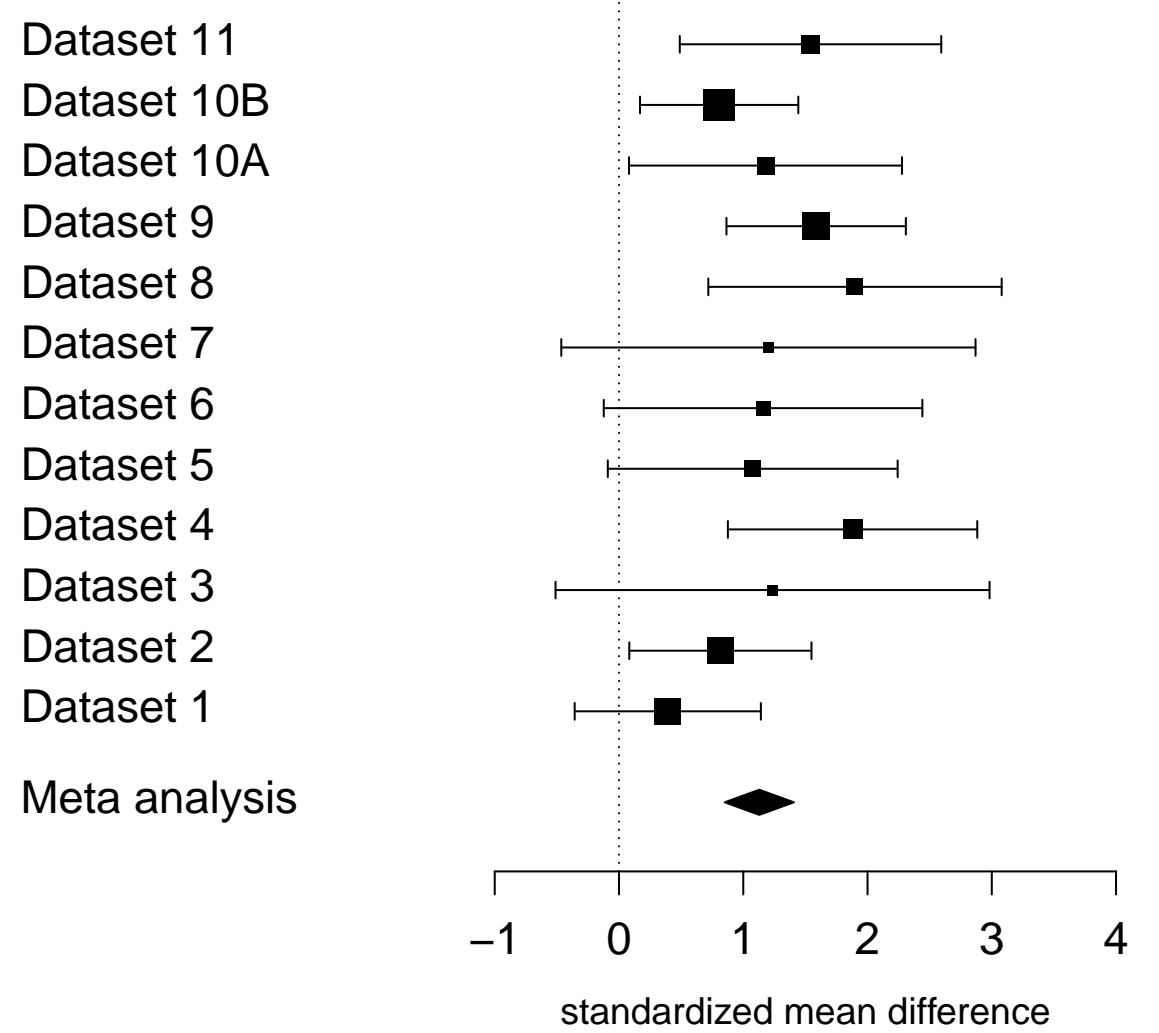**BASP1**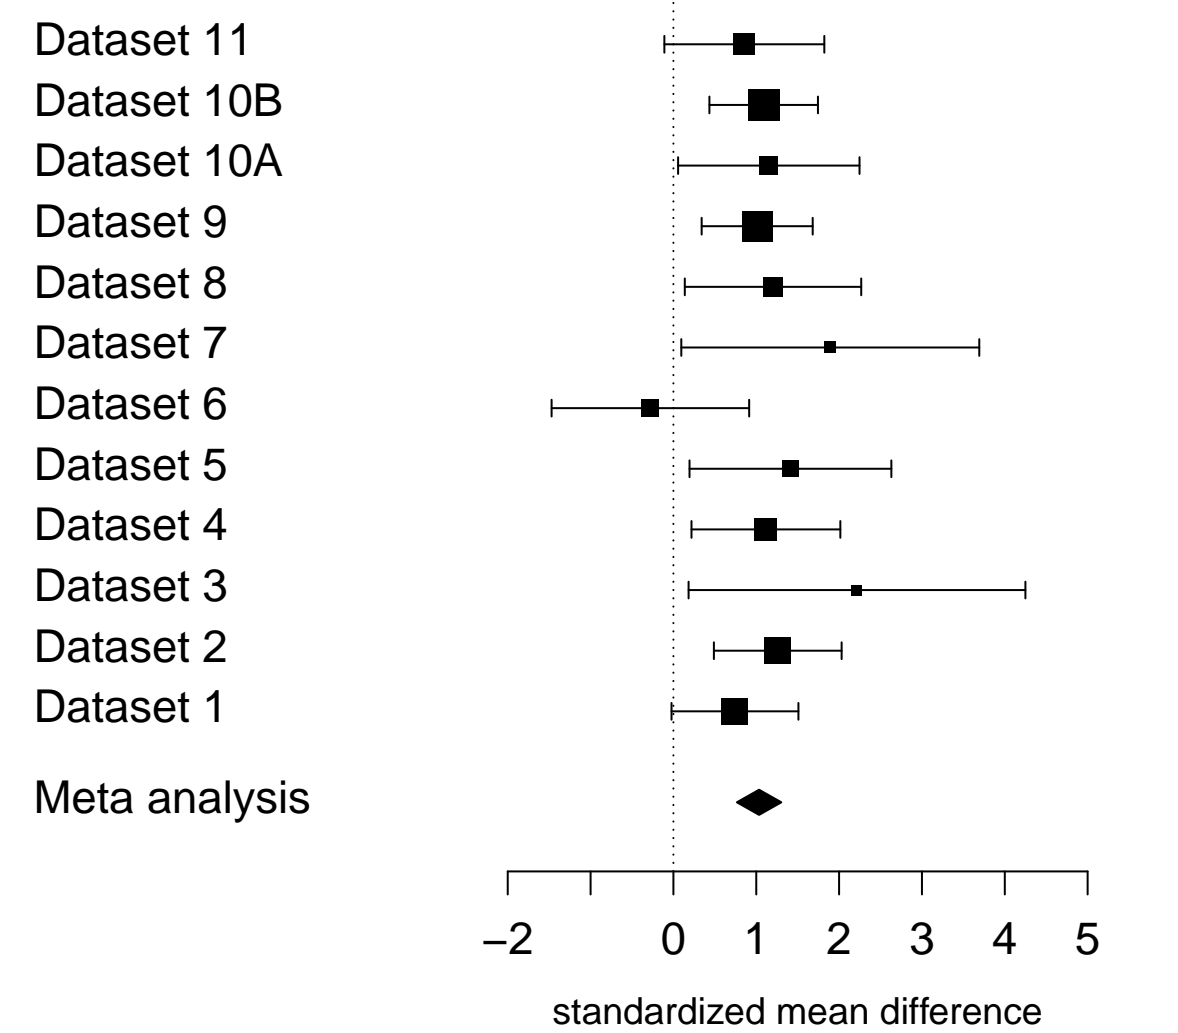**SLC20A1**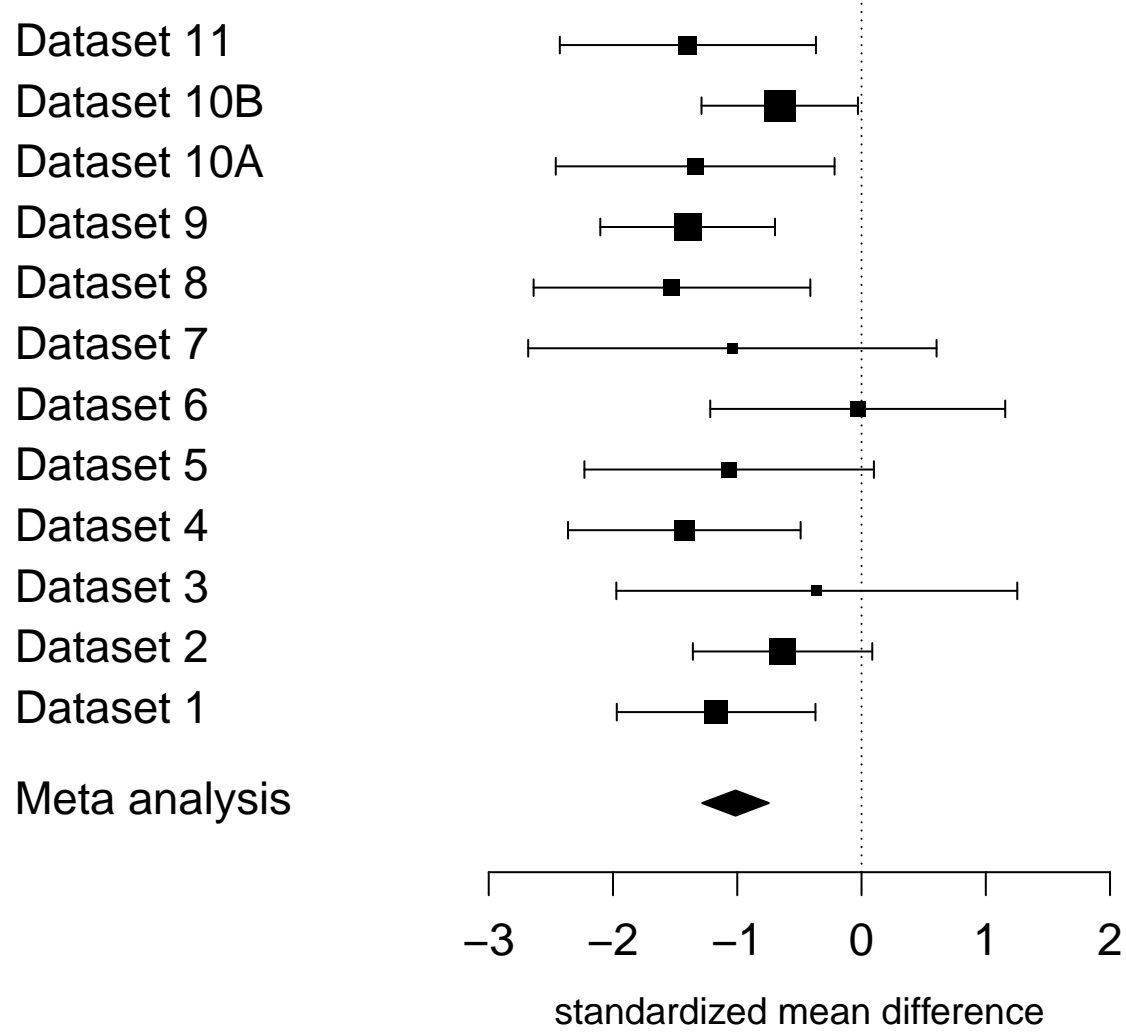**PAPPA2**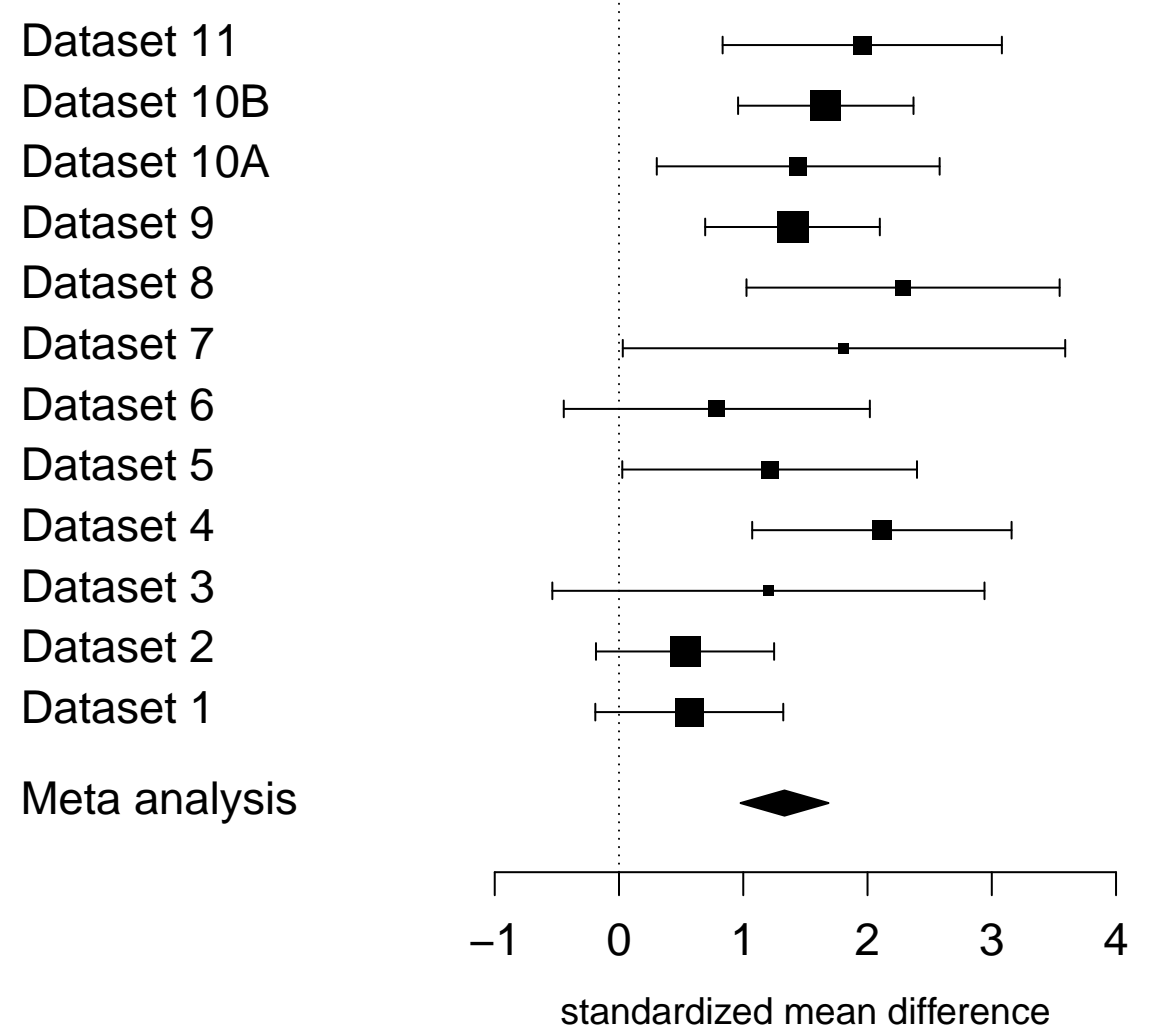**BCL6**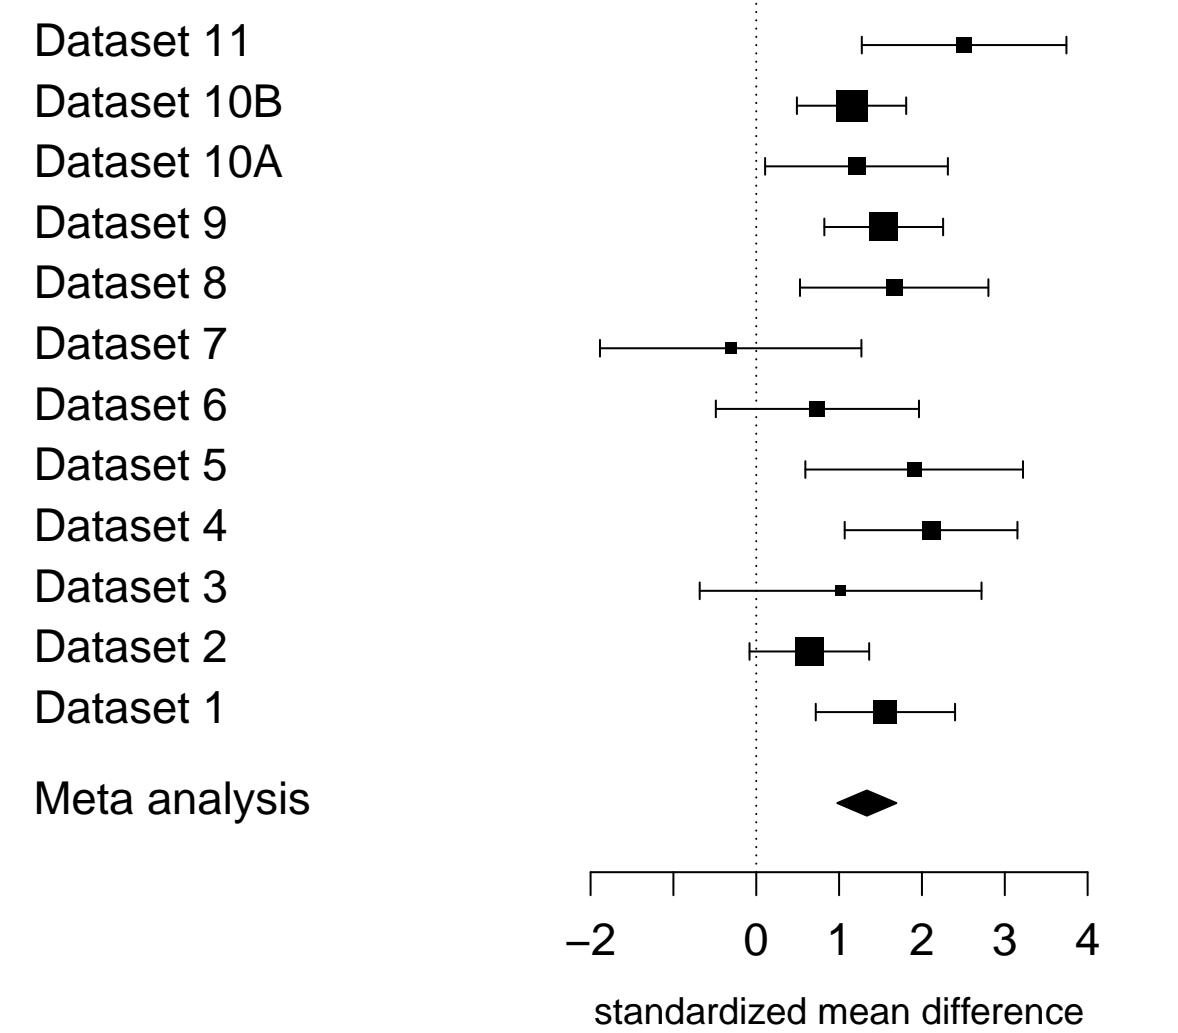**SH3TC2**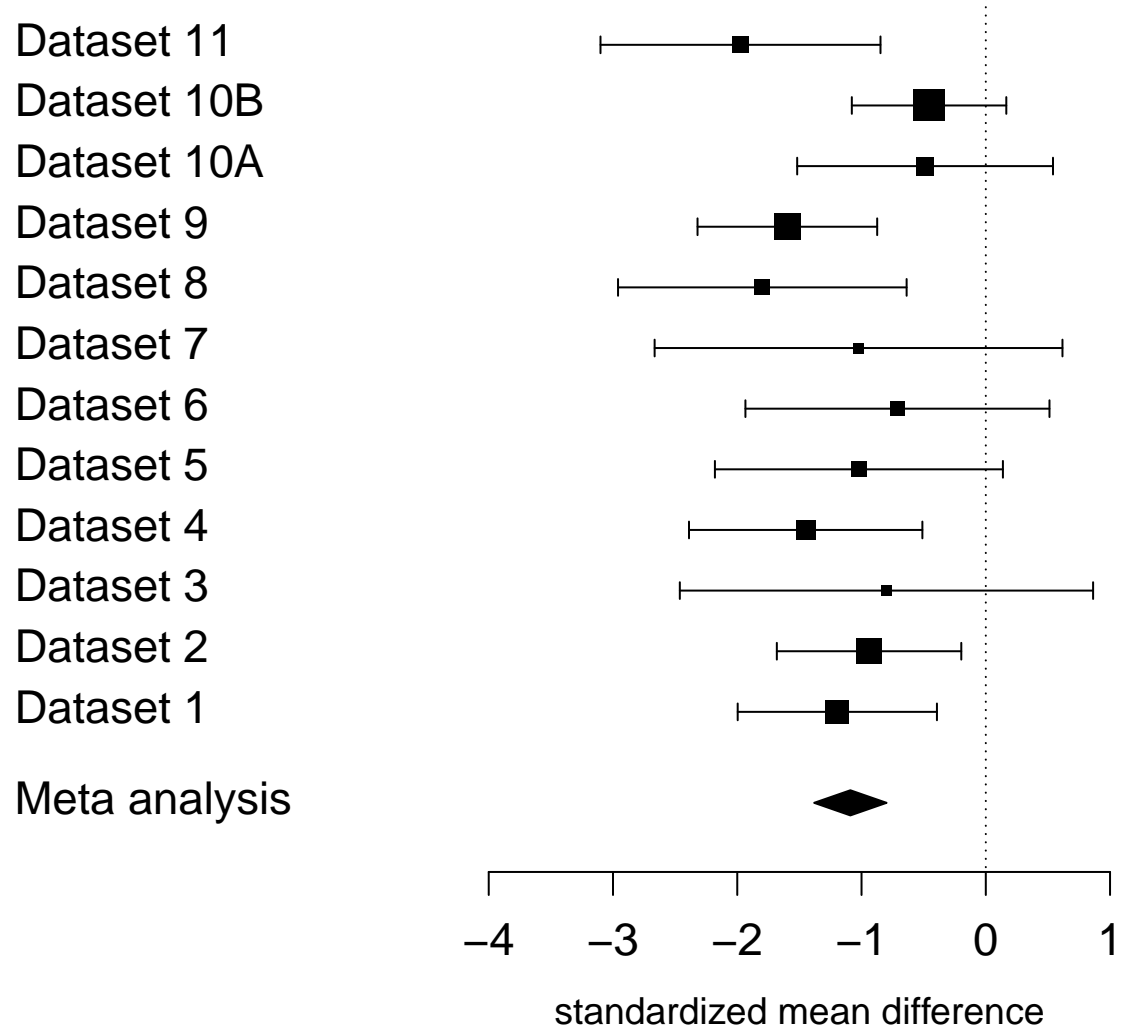**RAB17**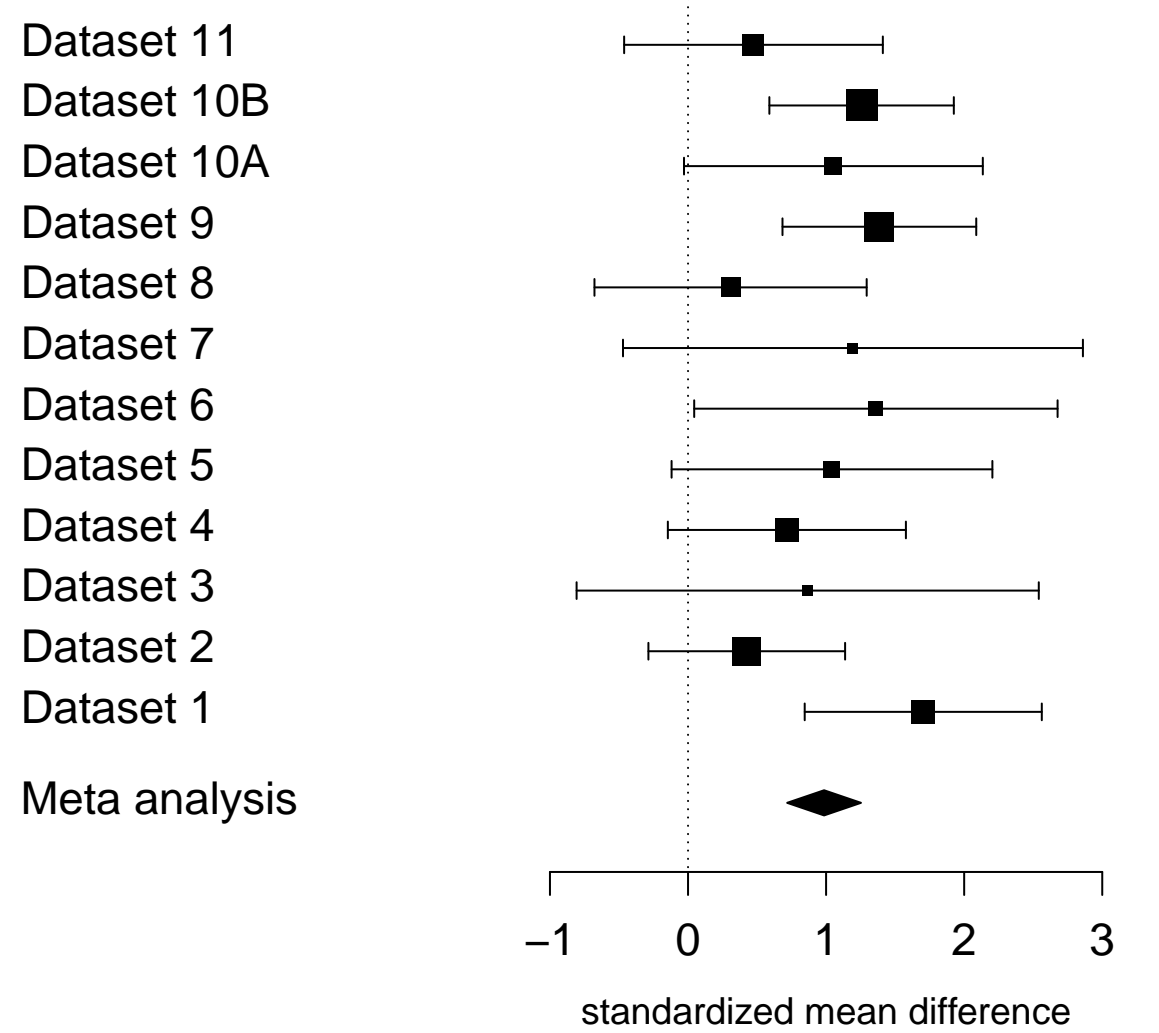**SYDE1**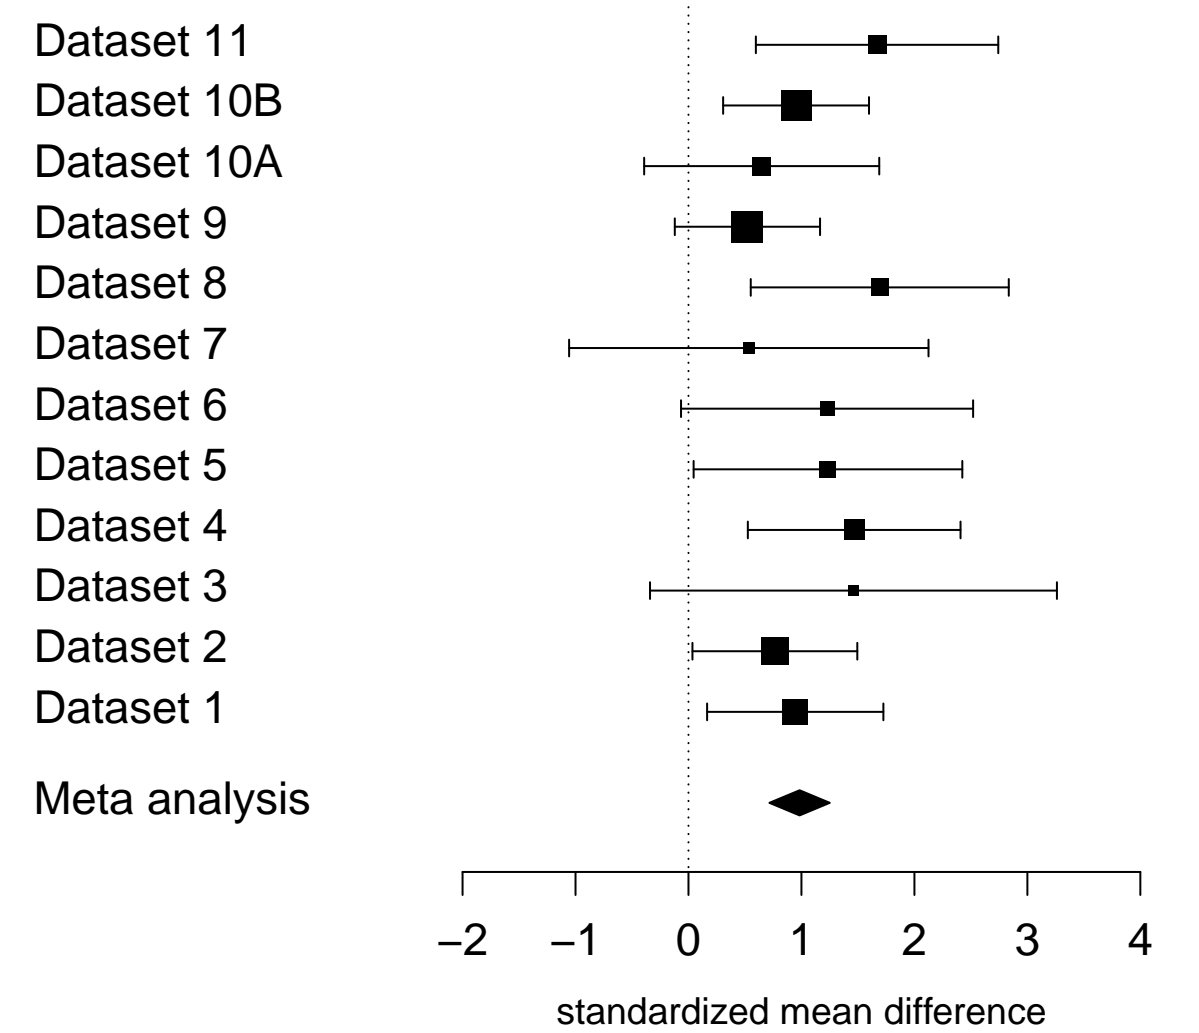



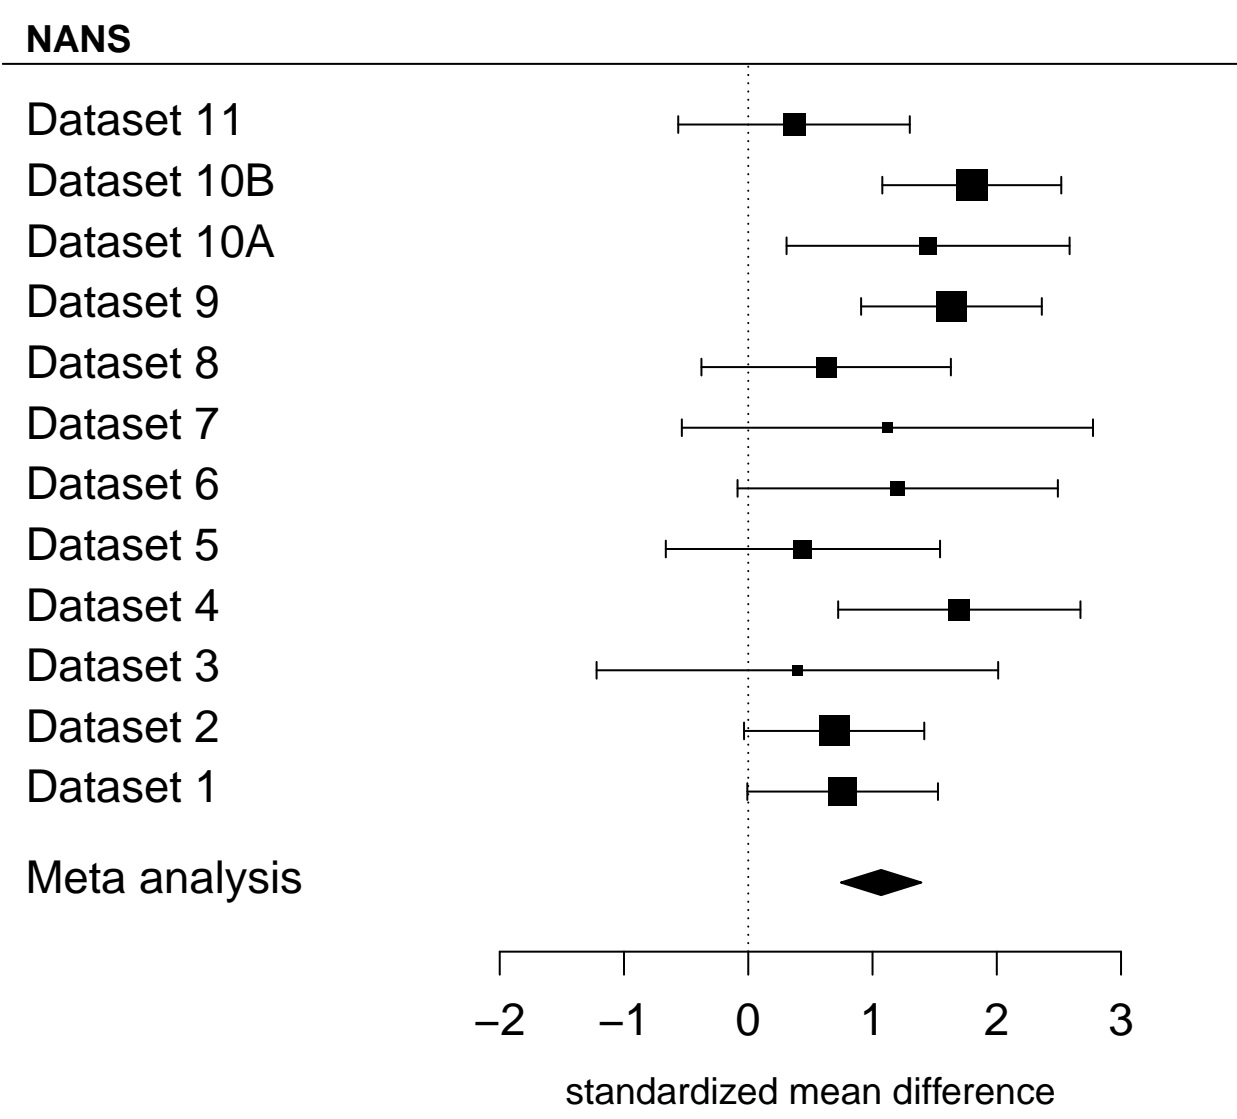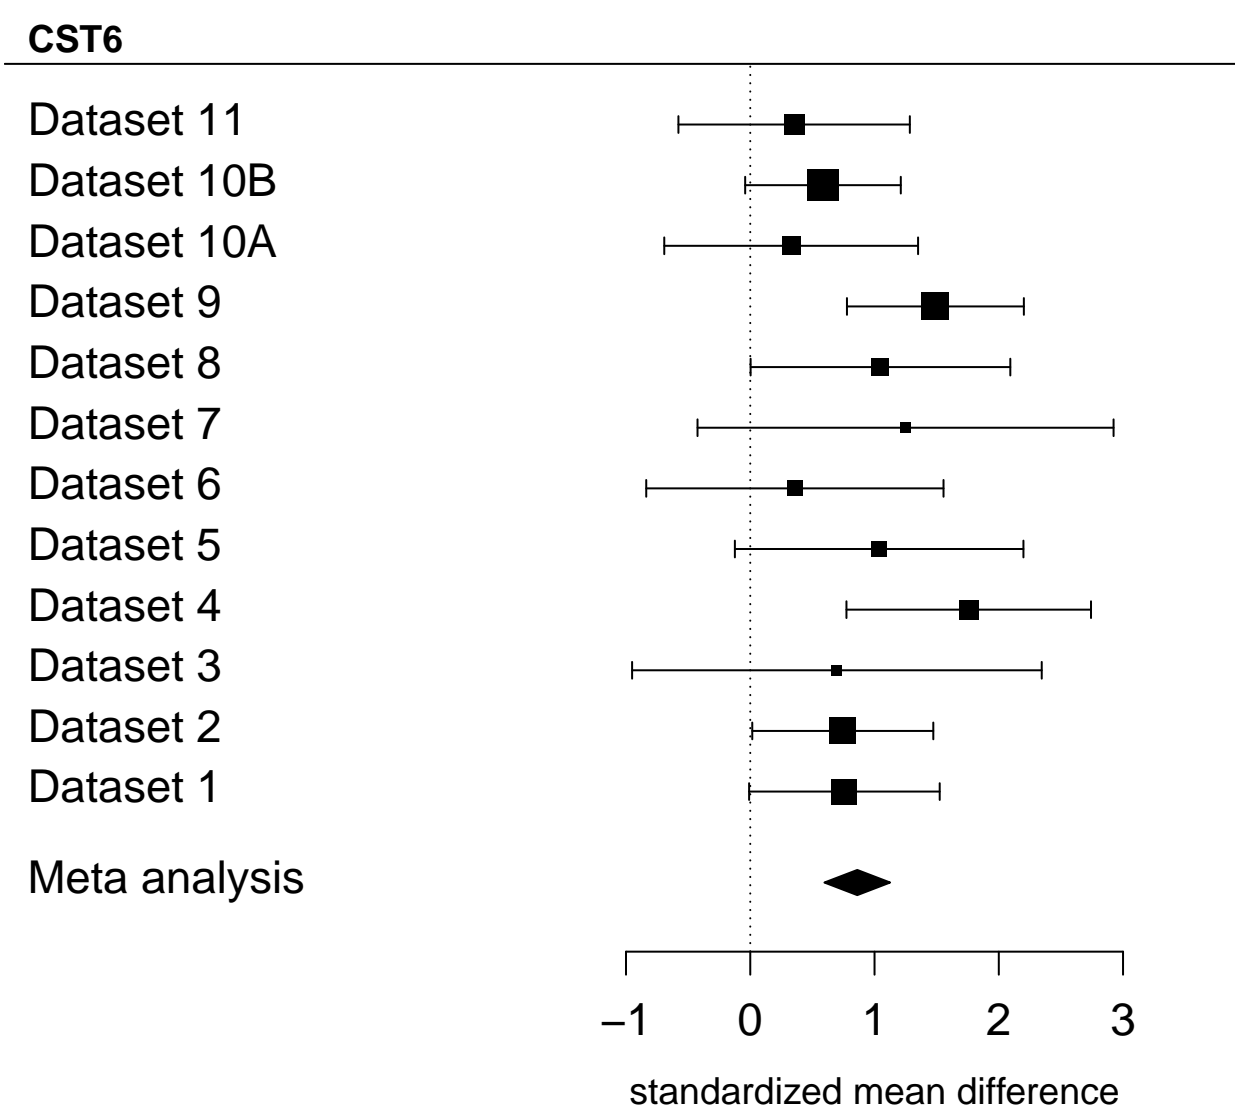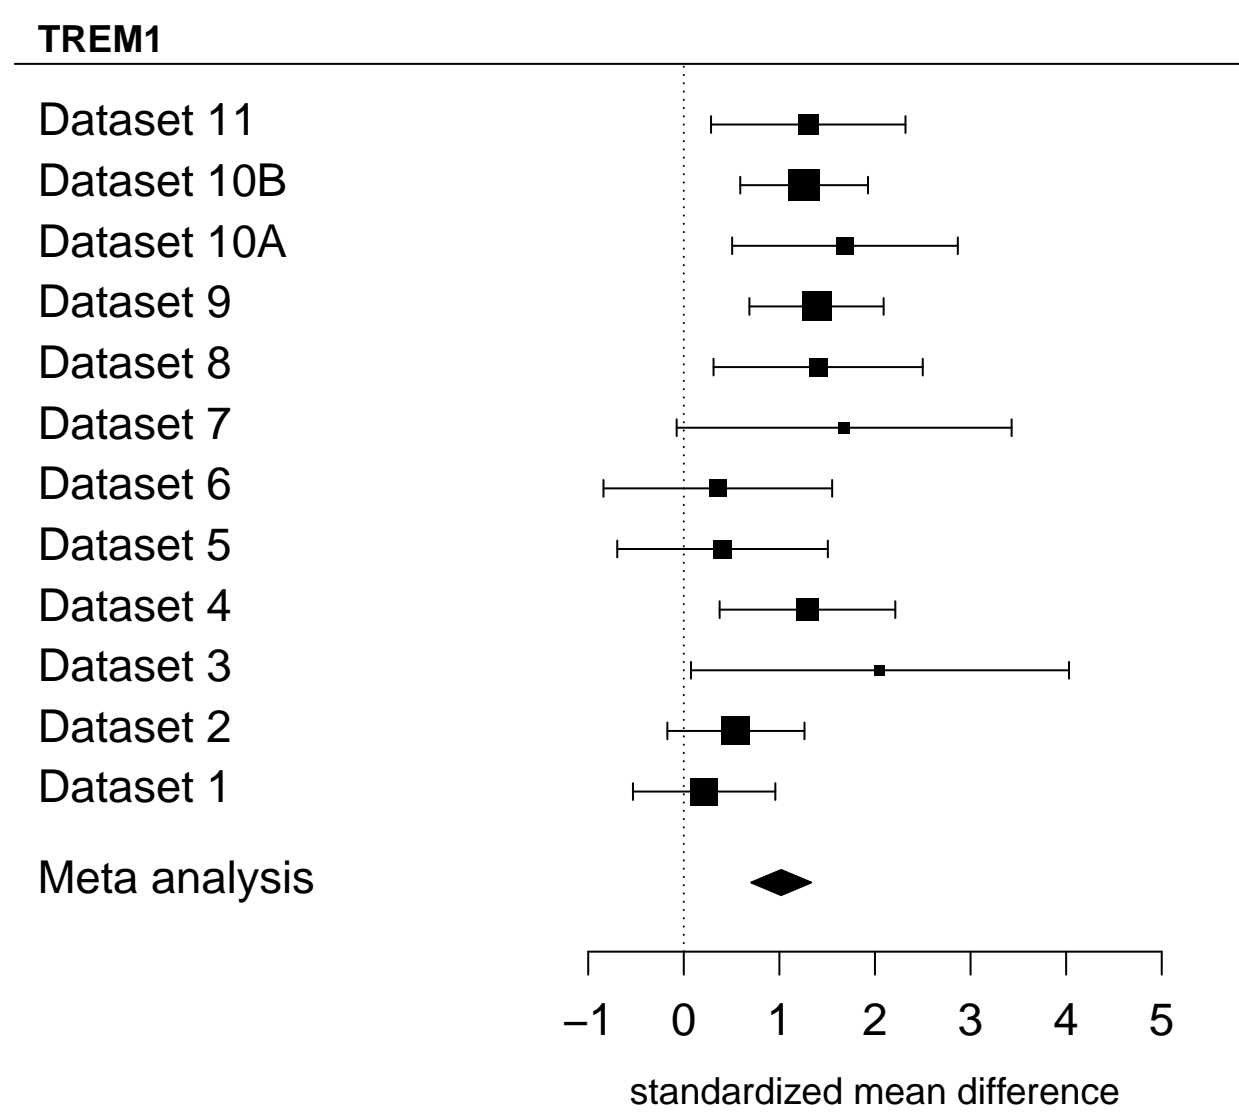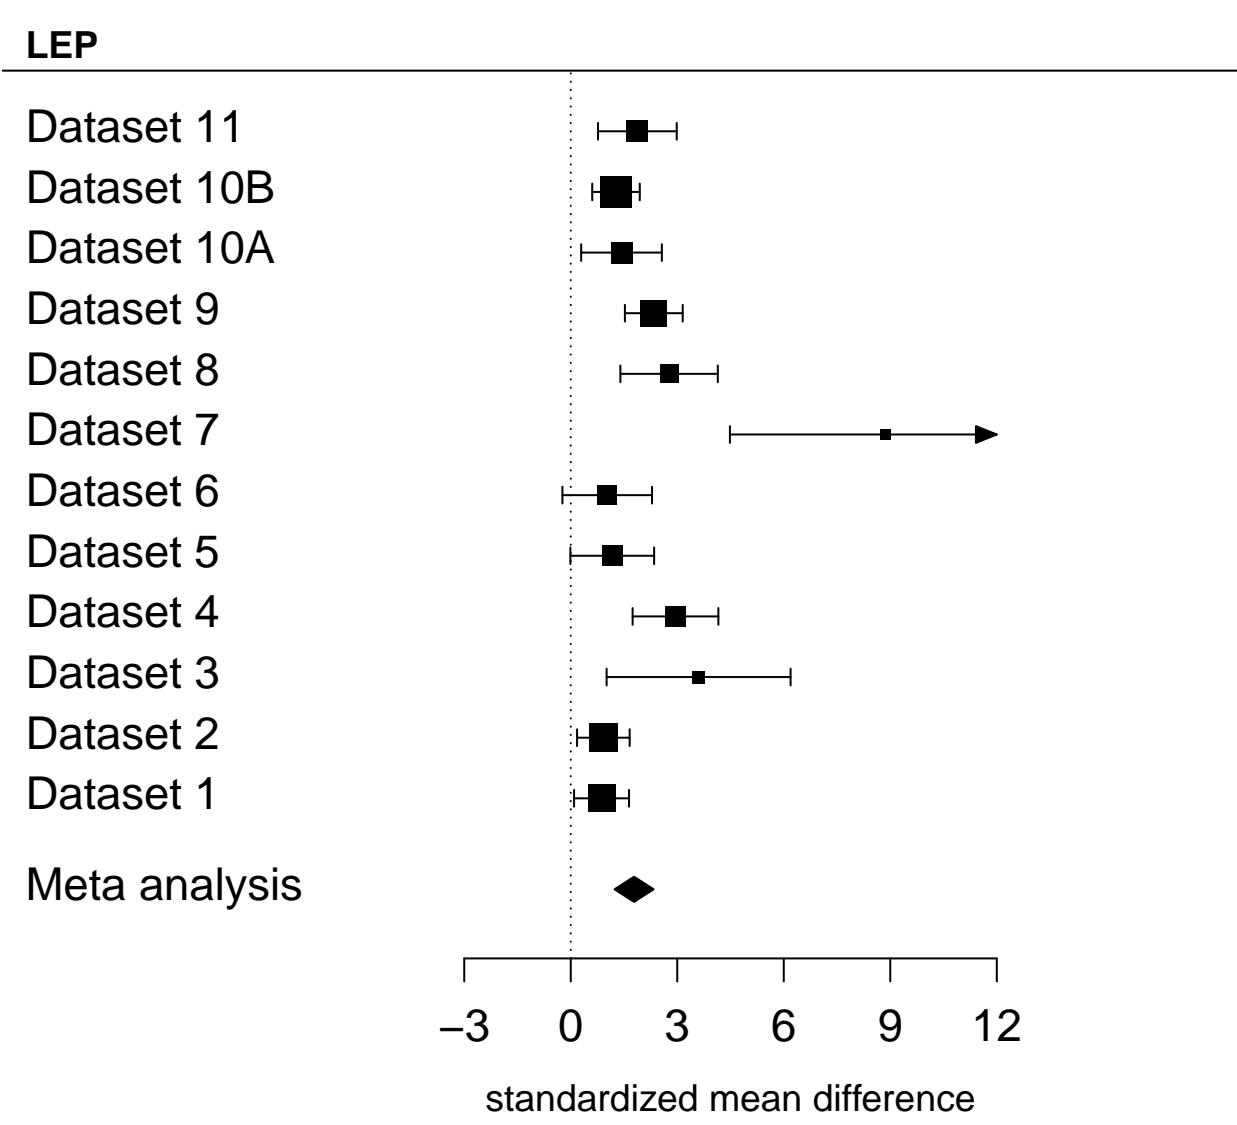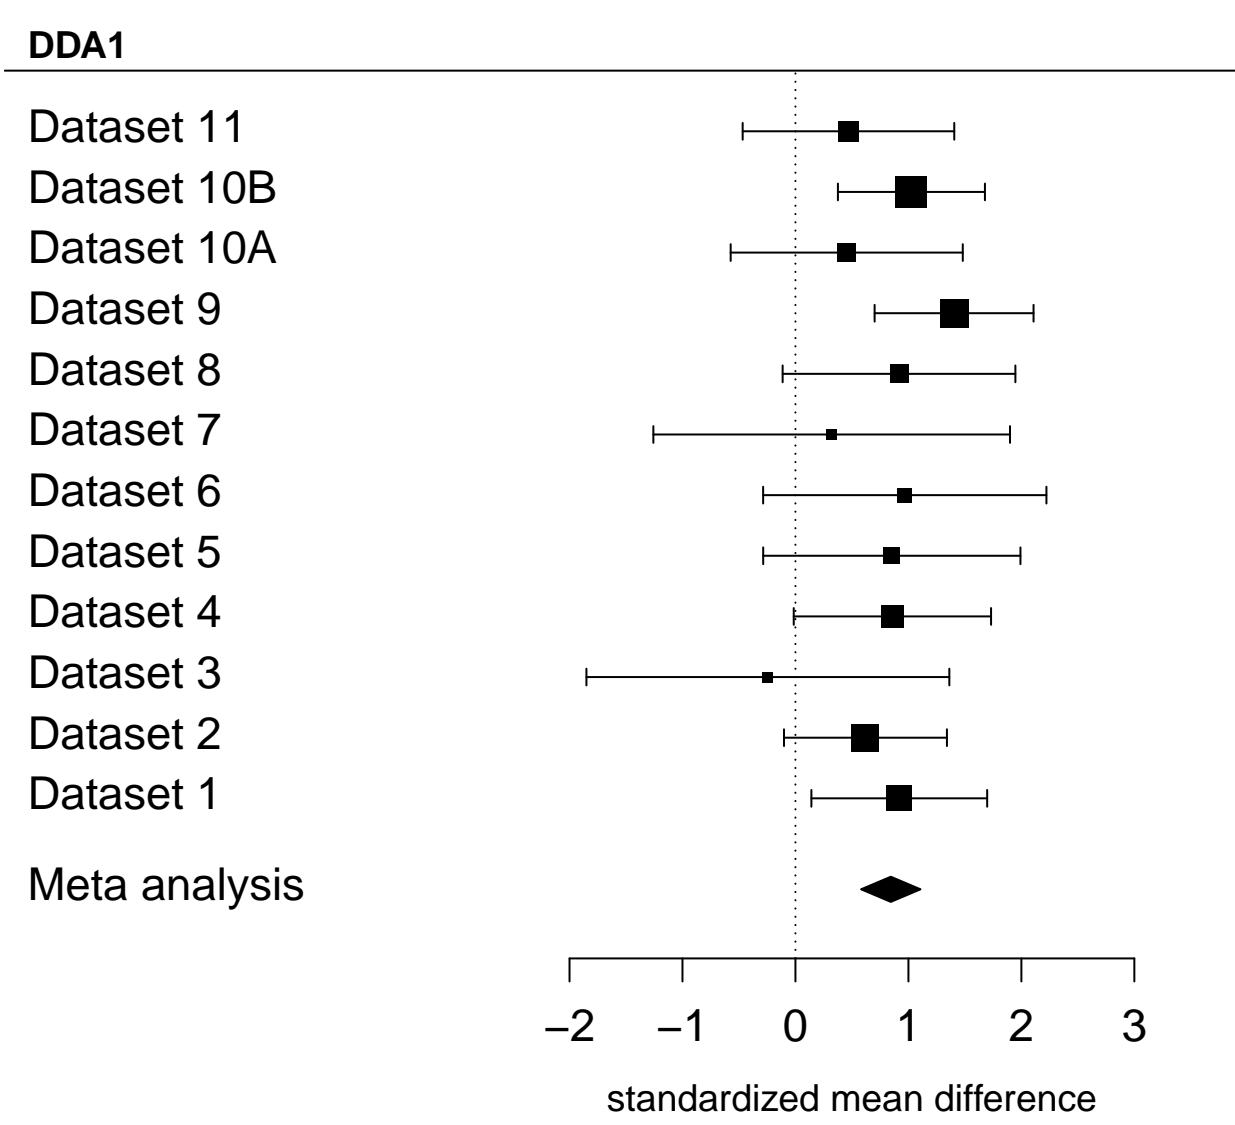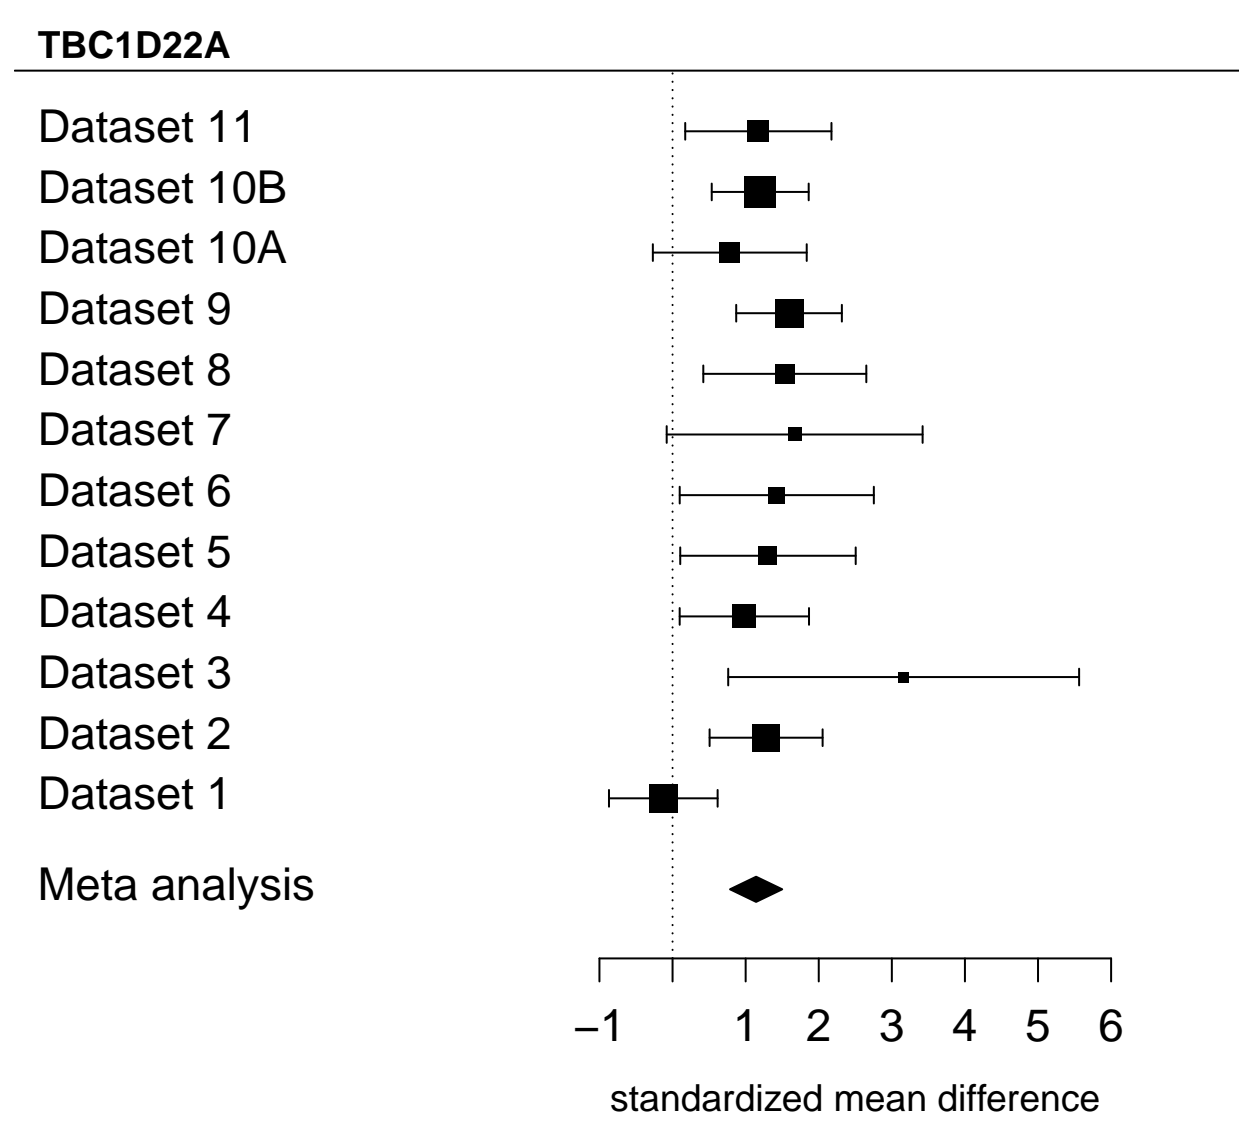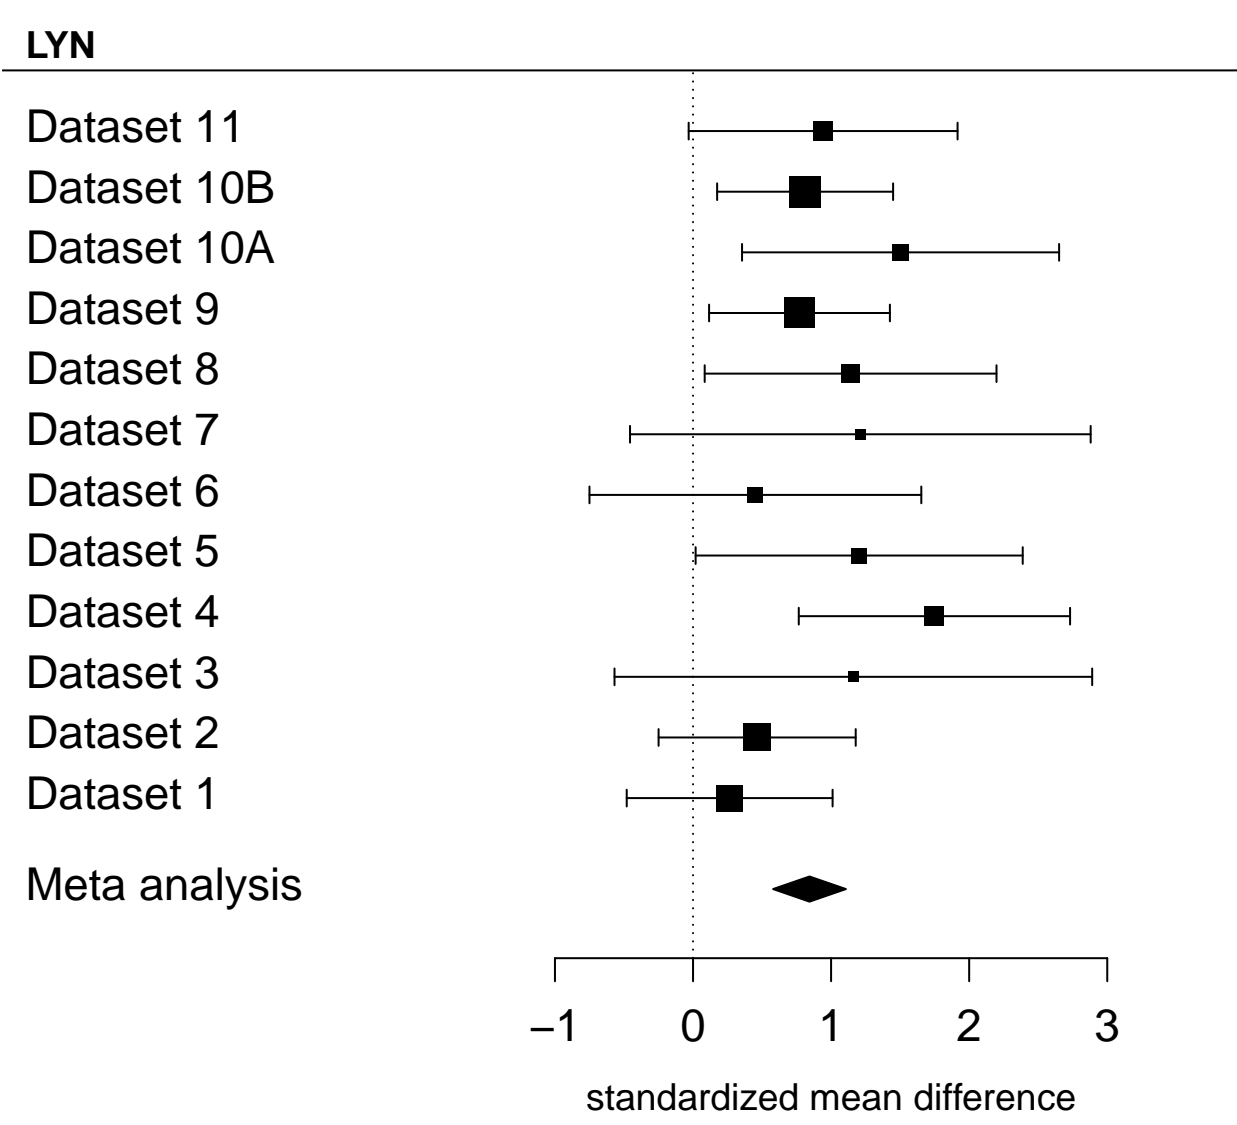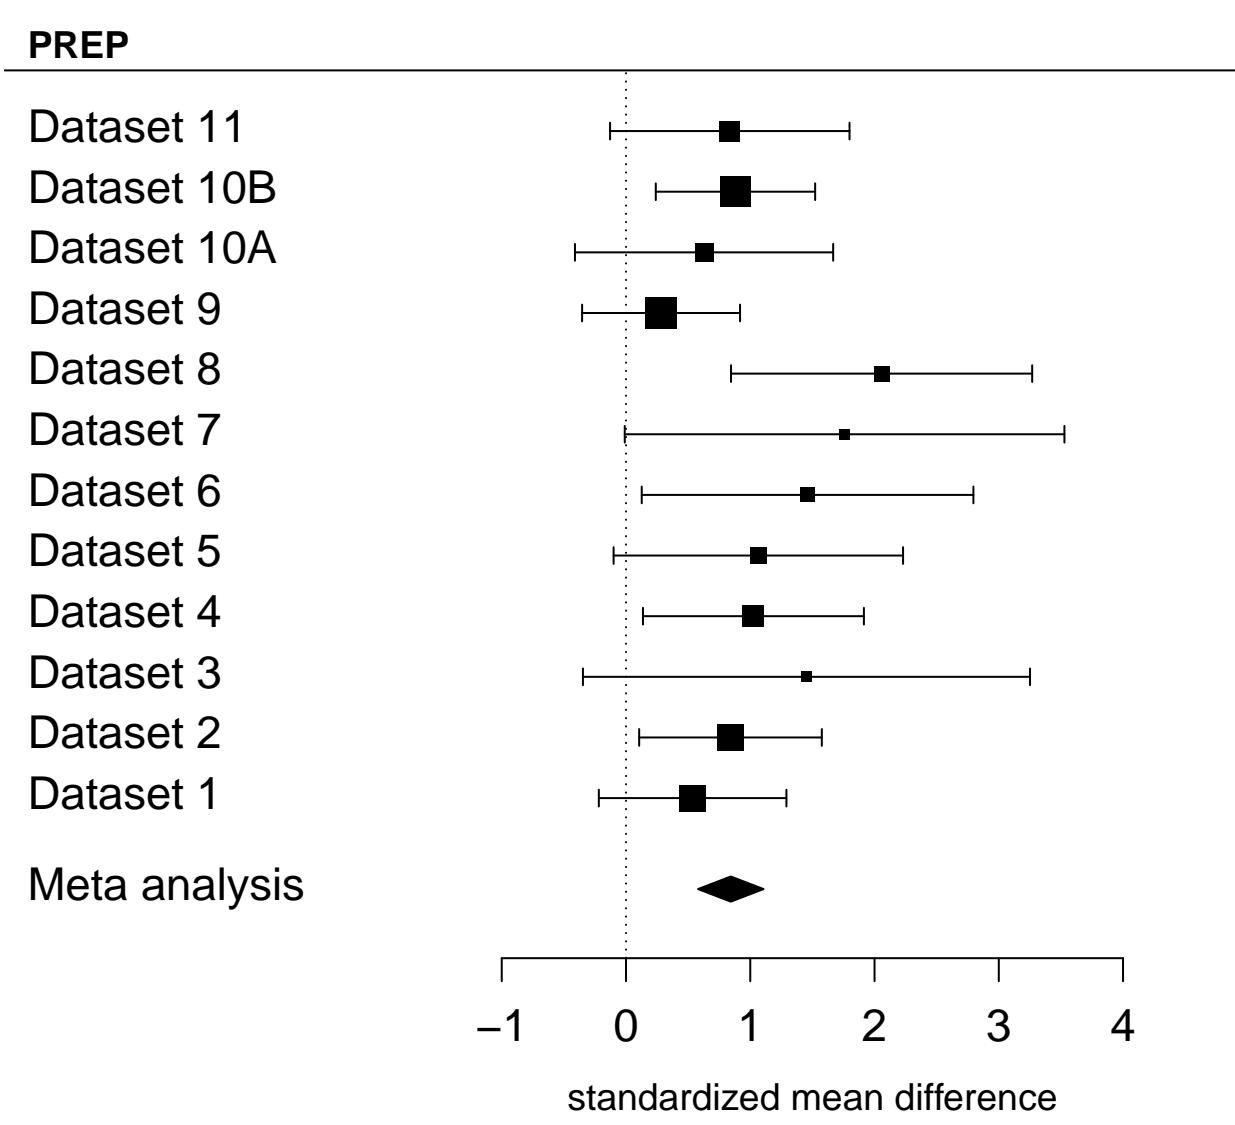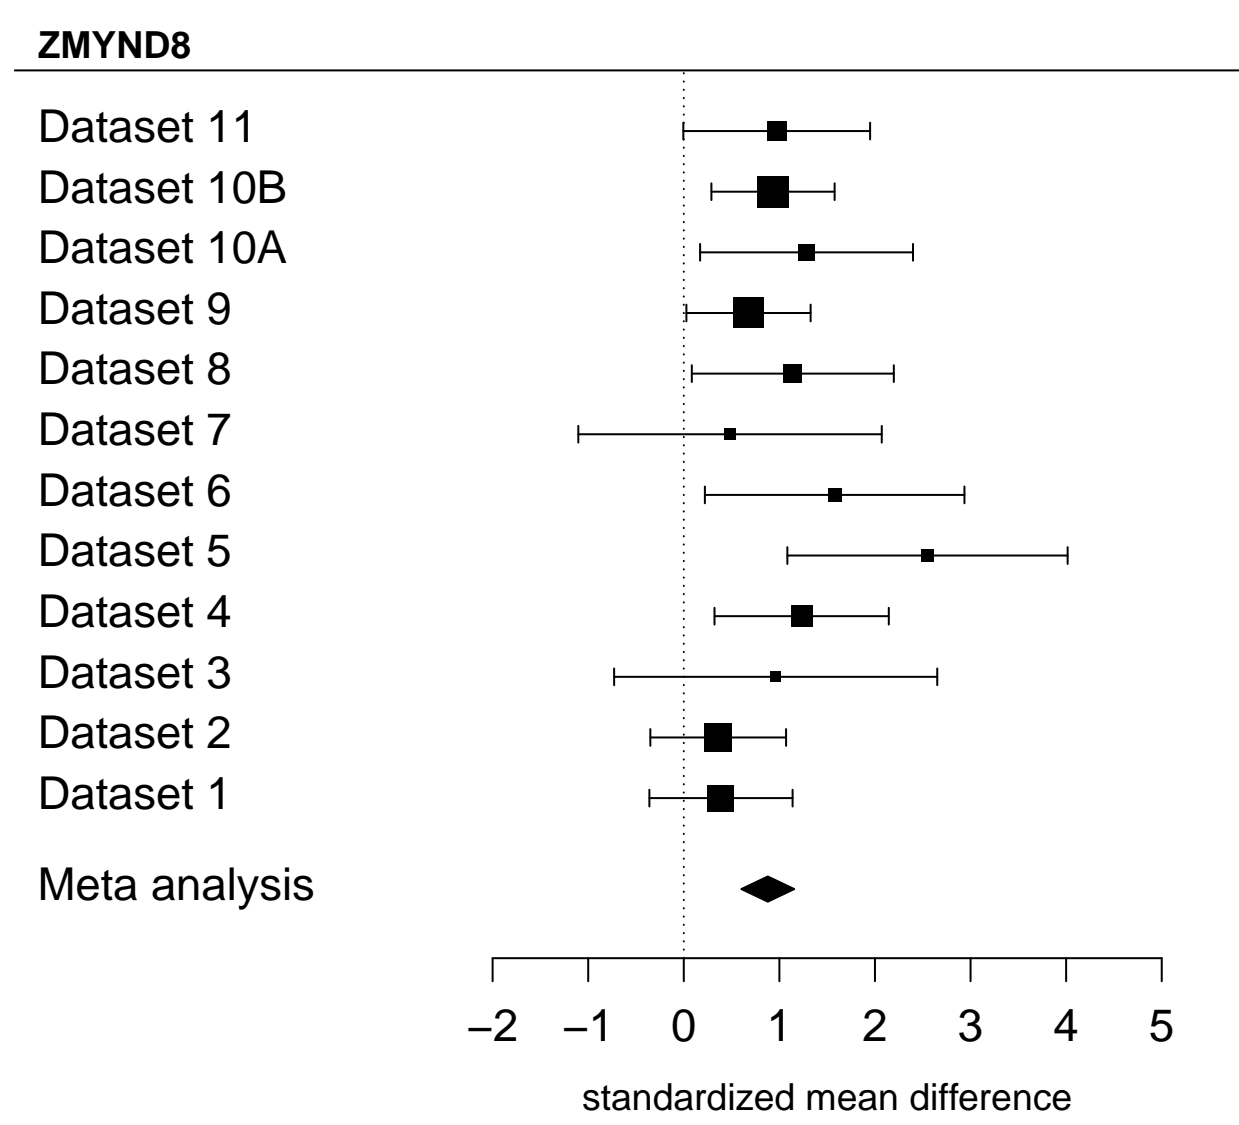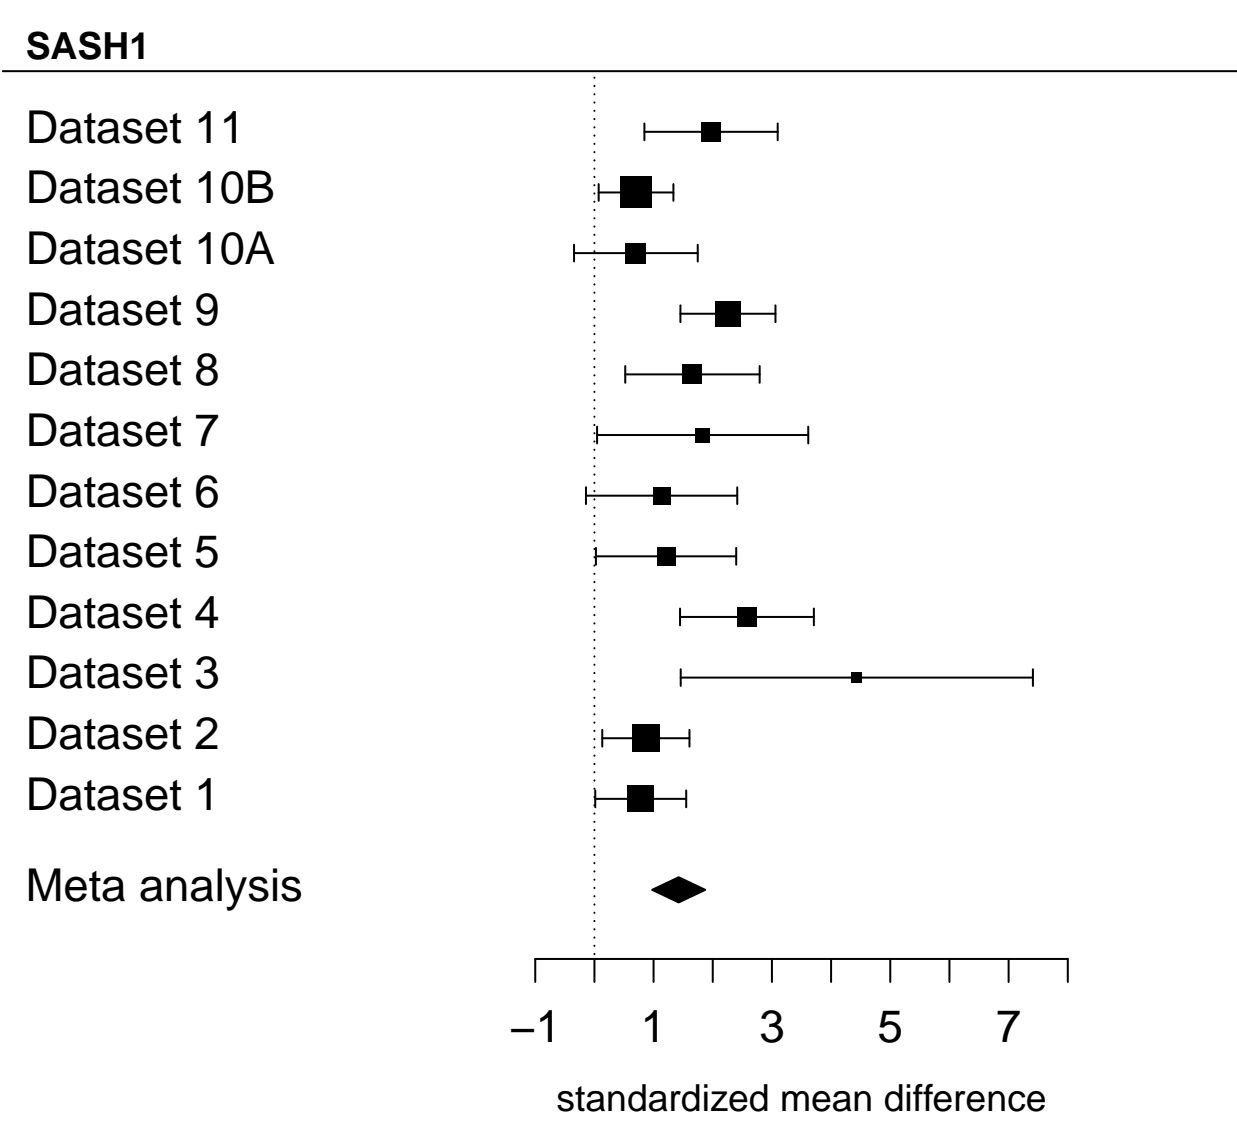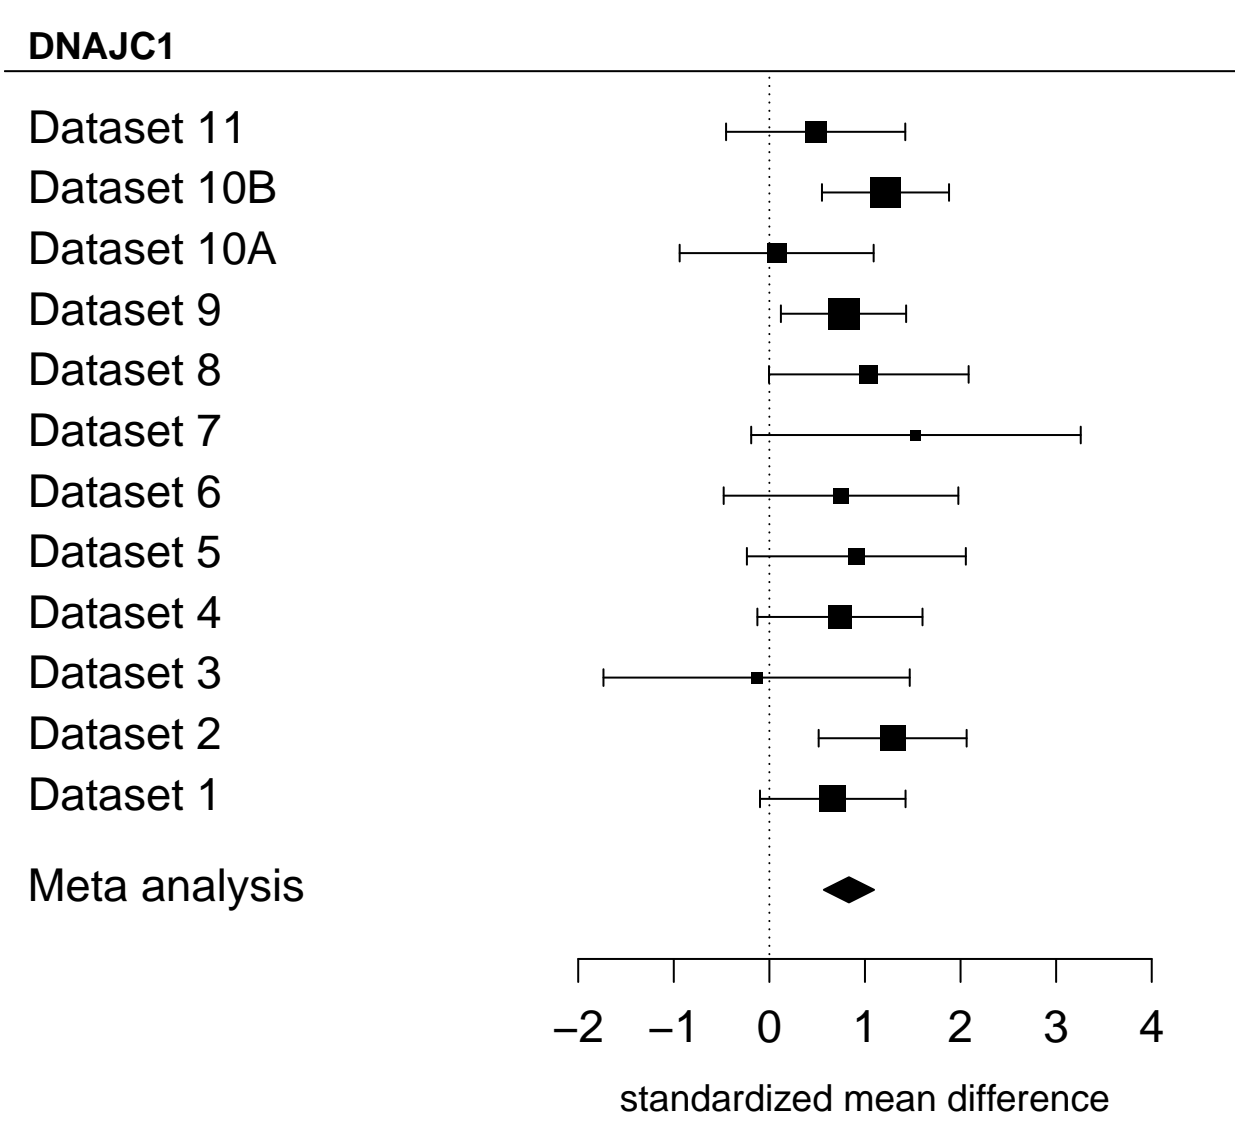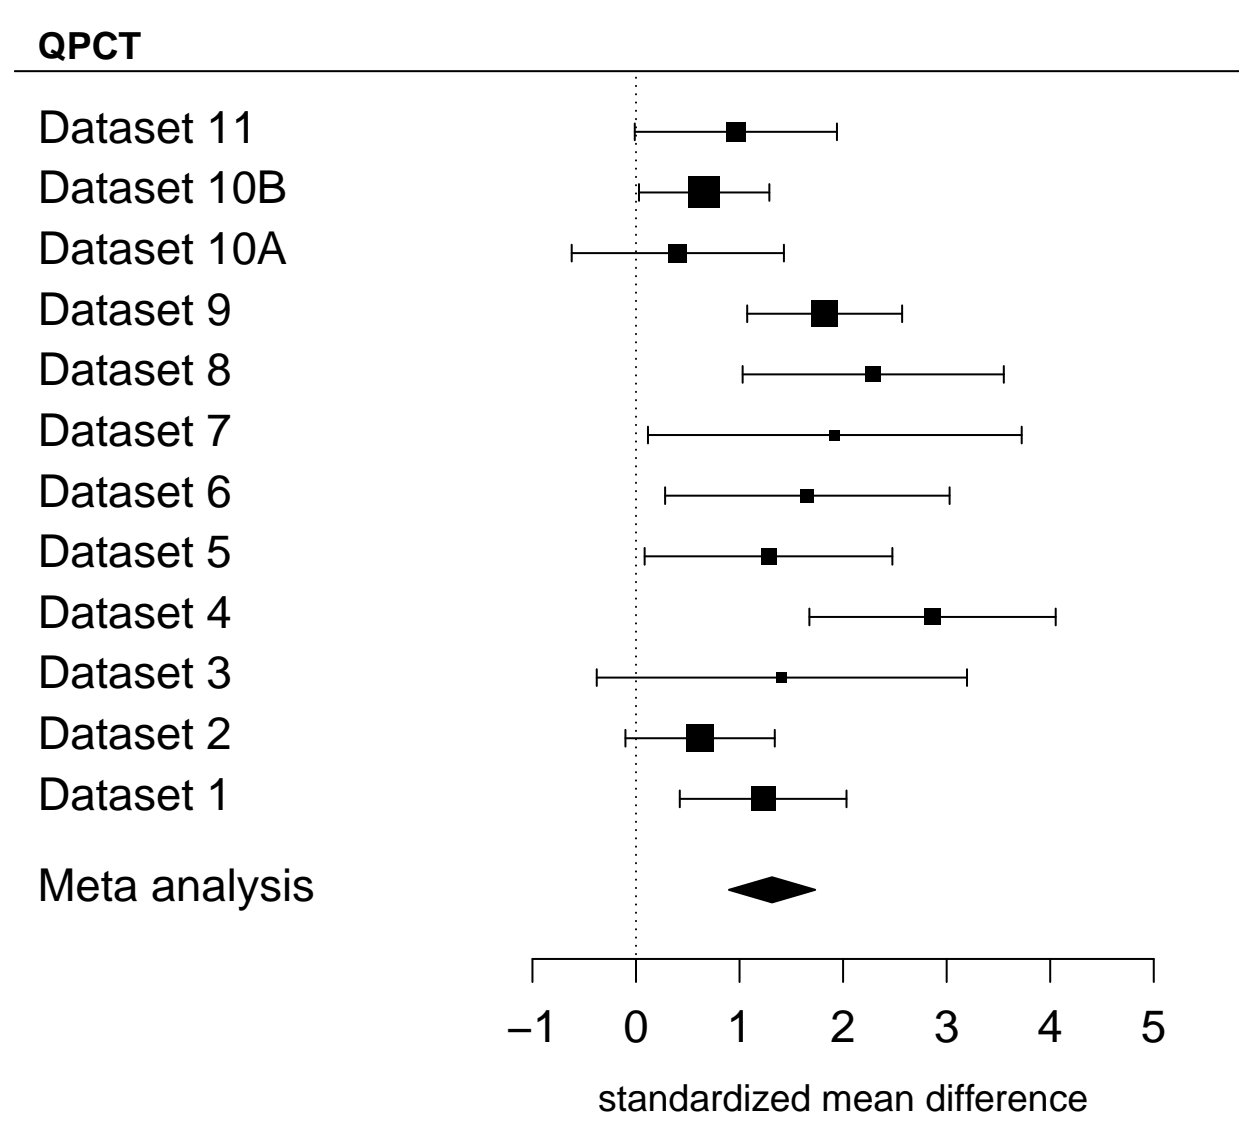

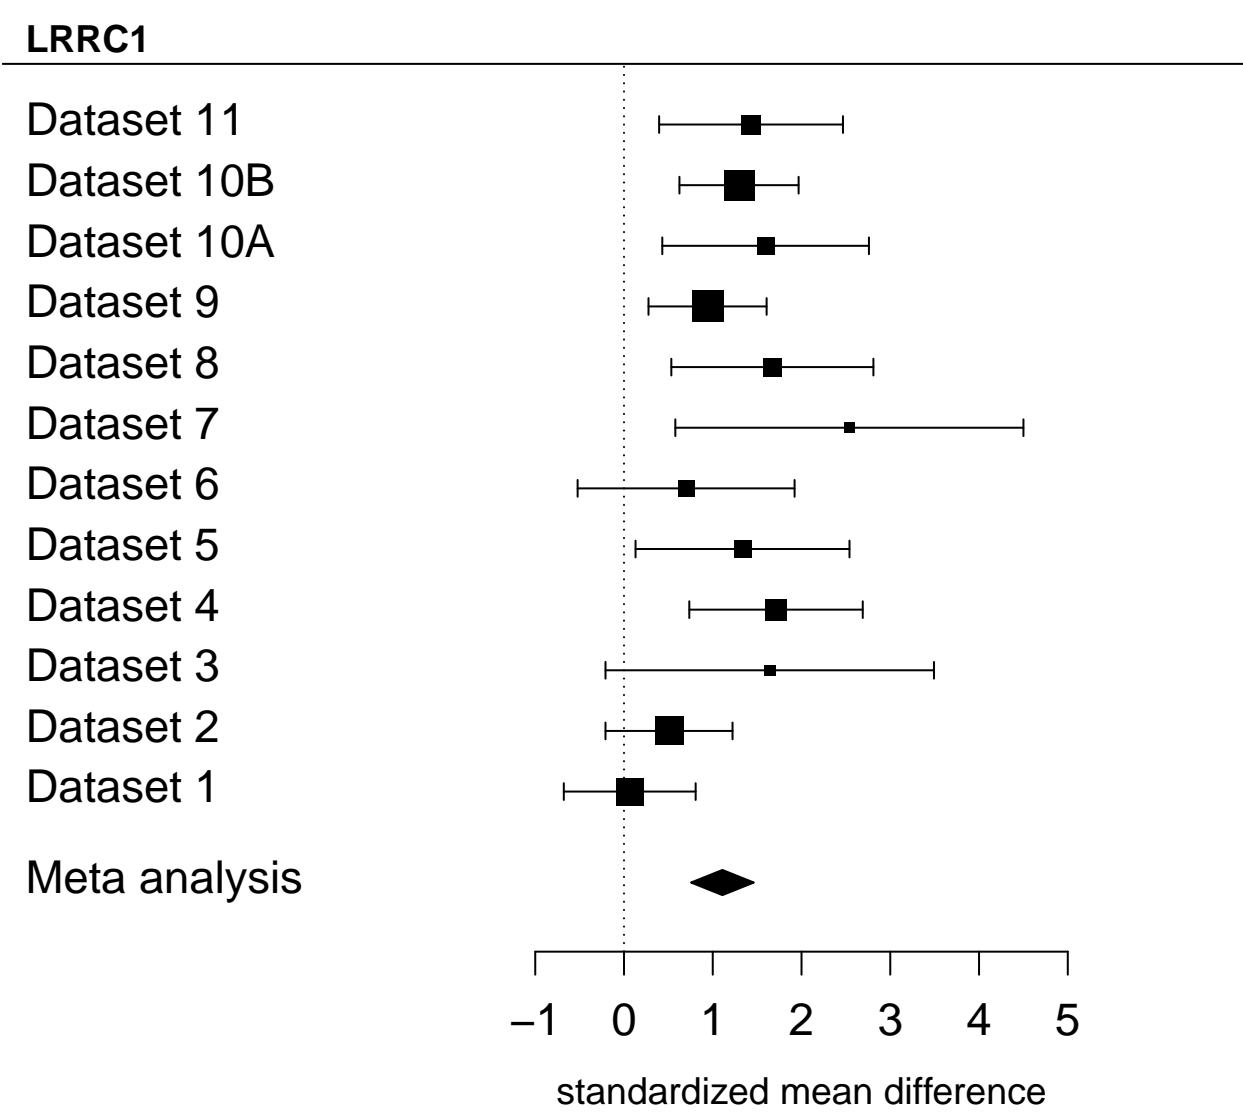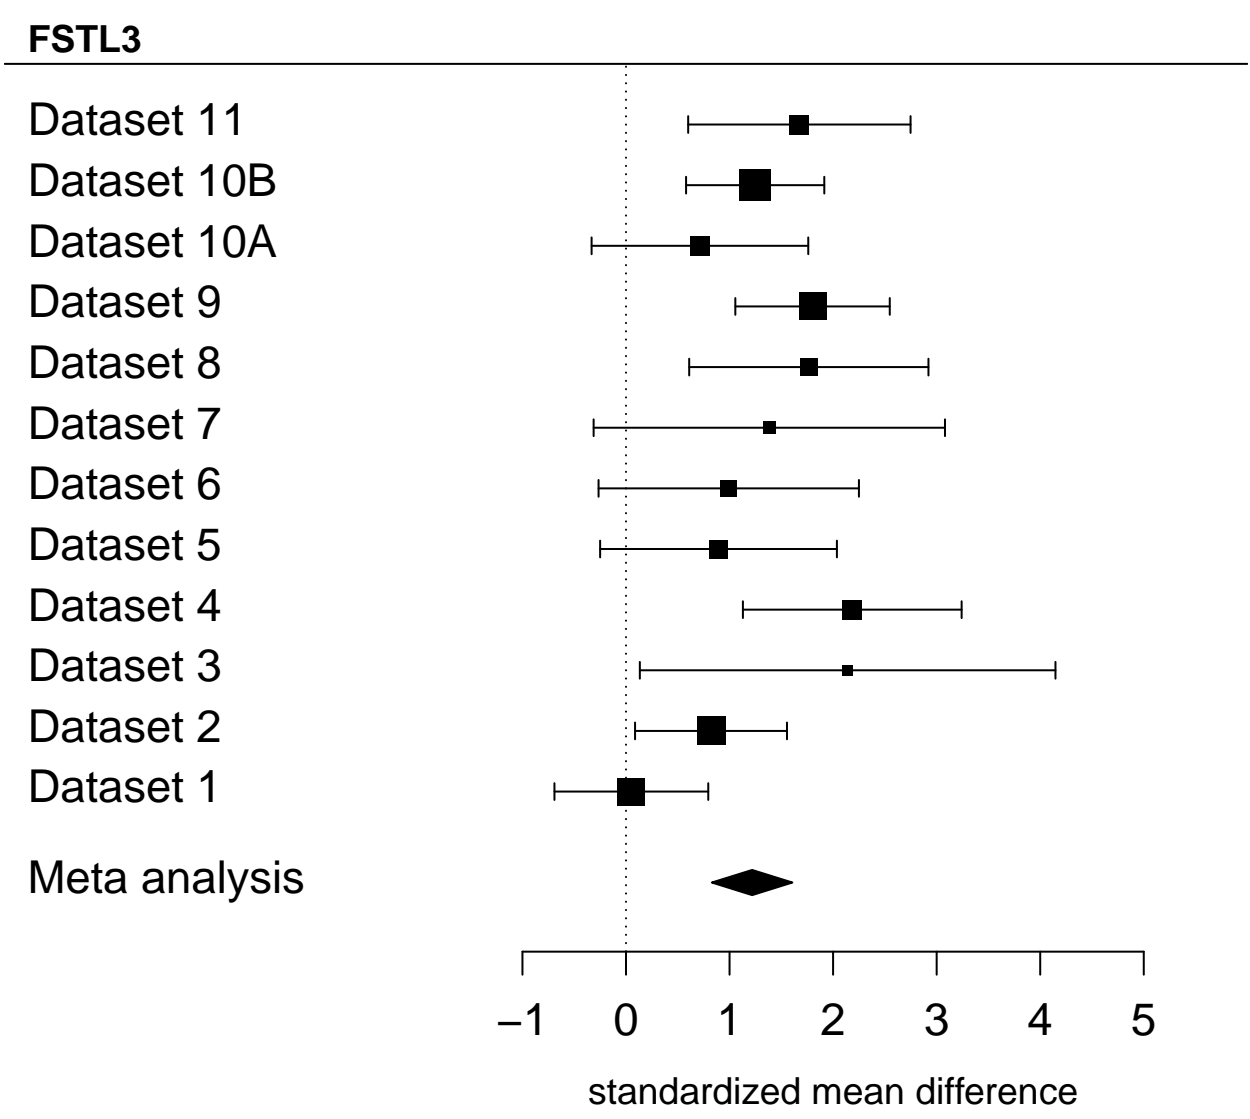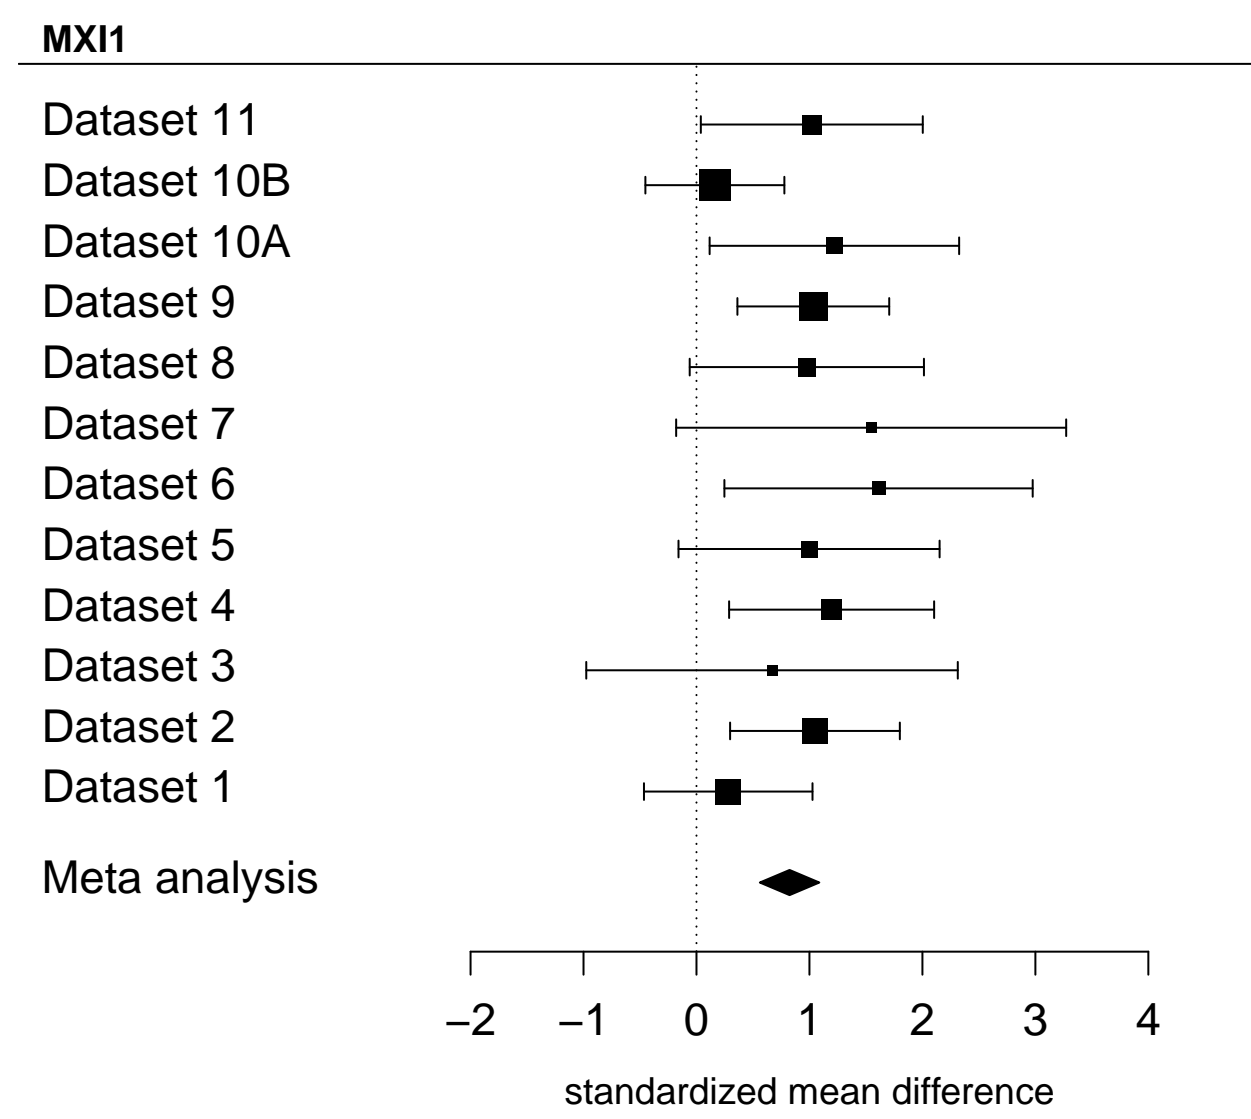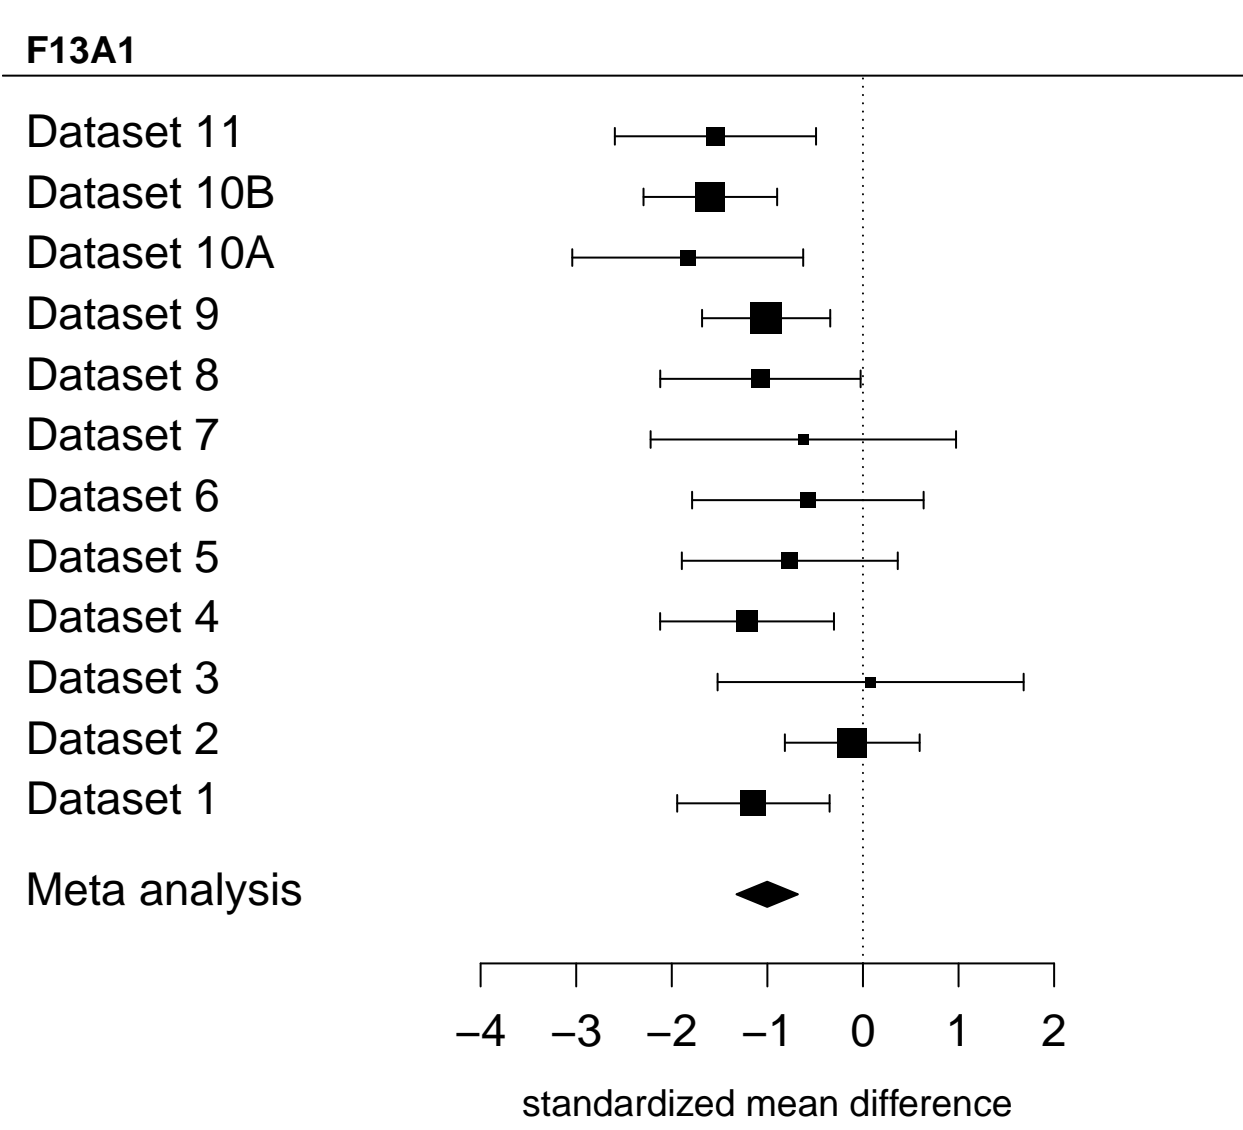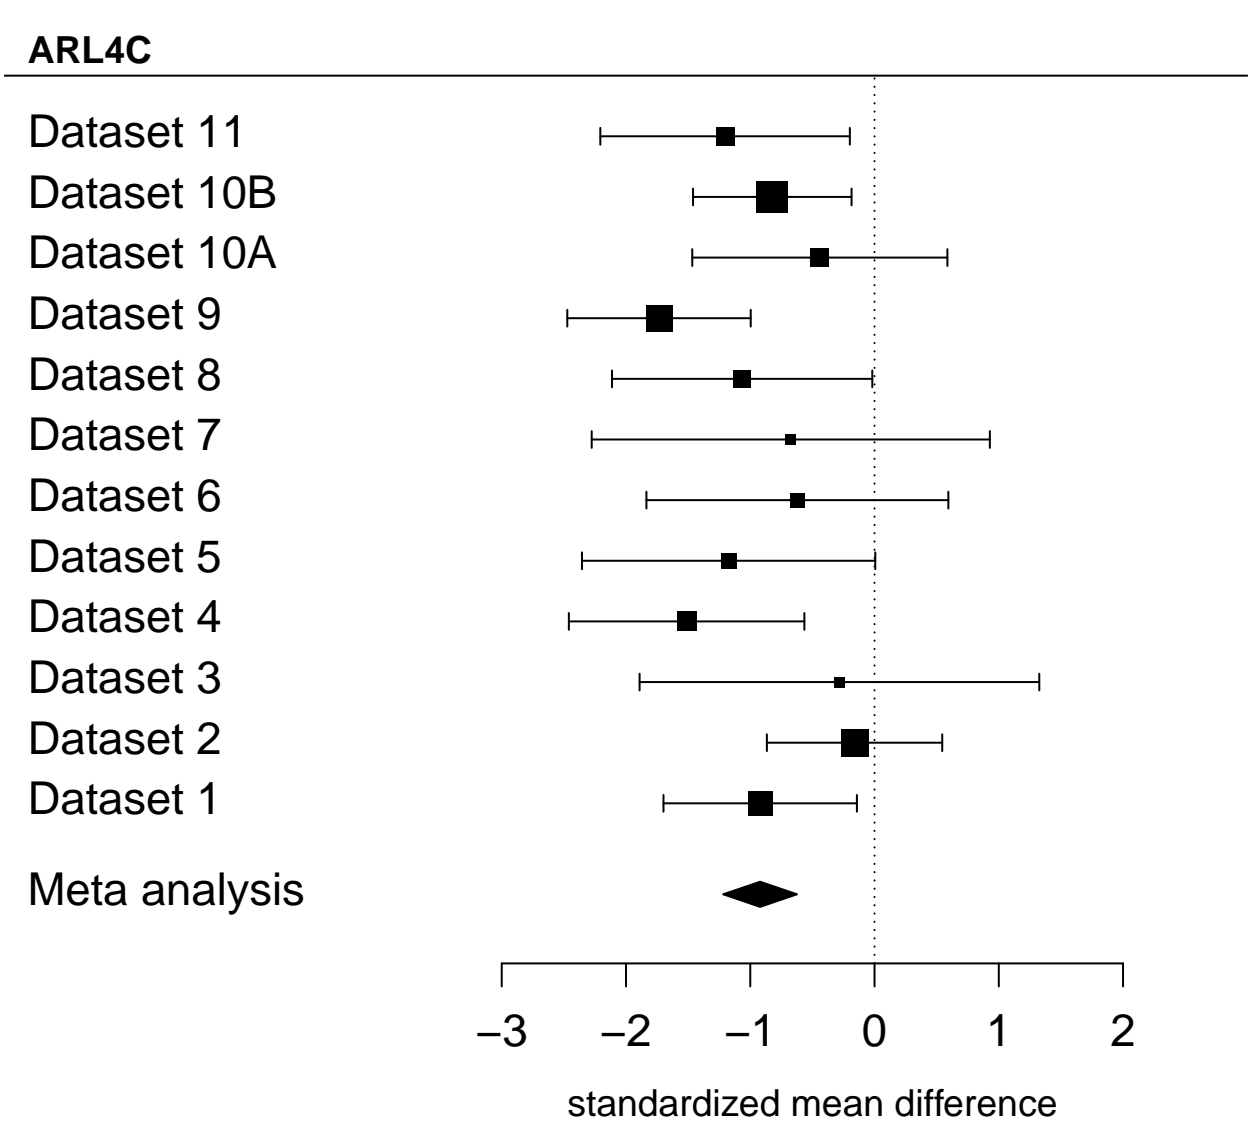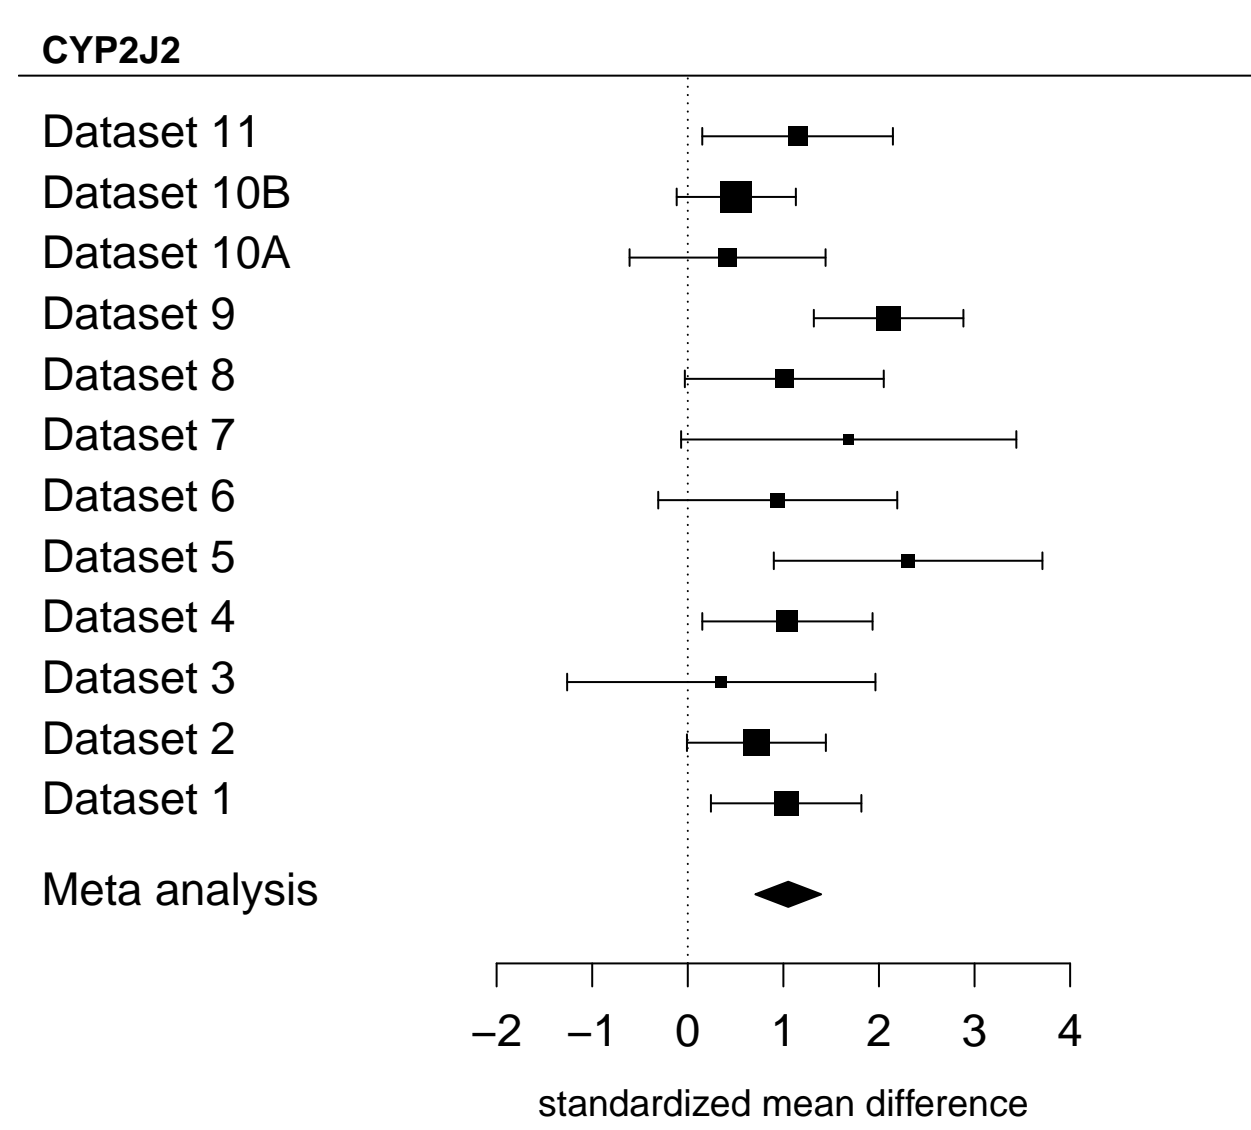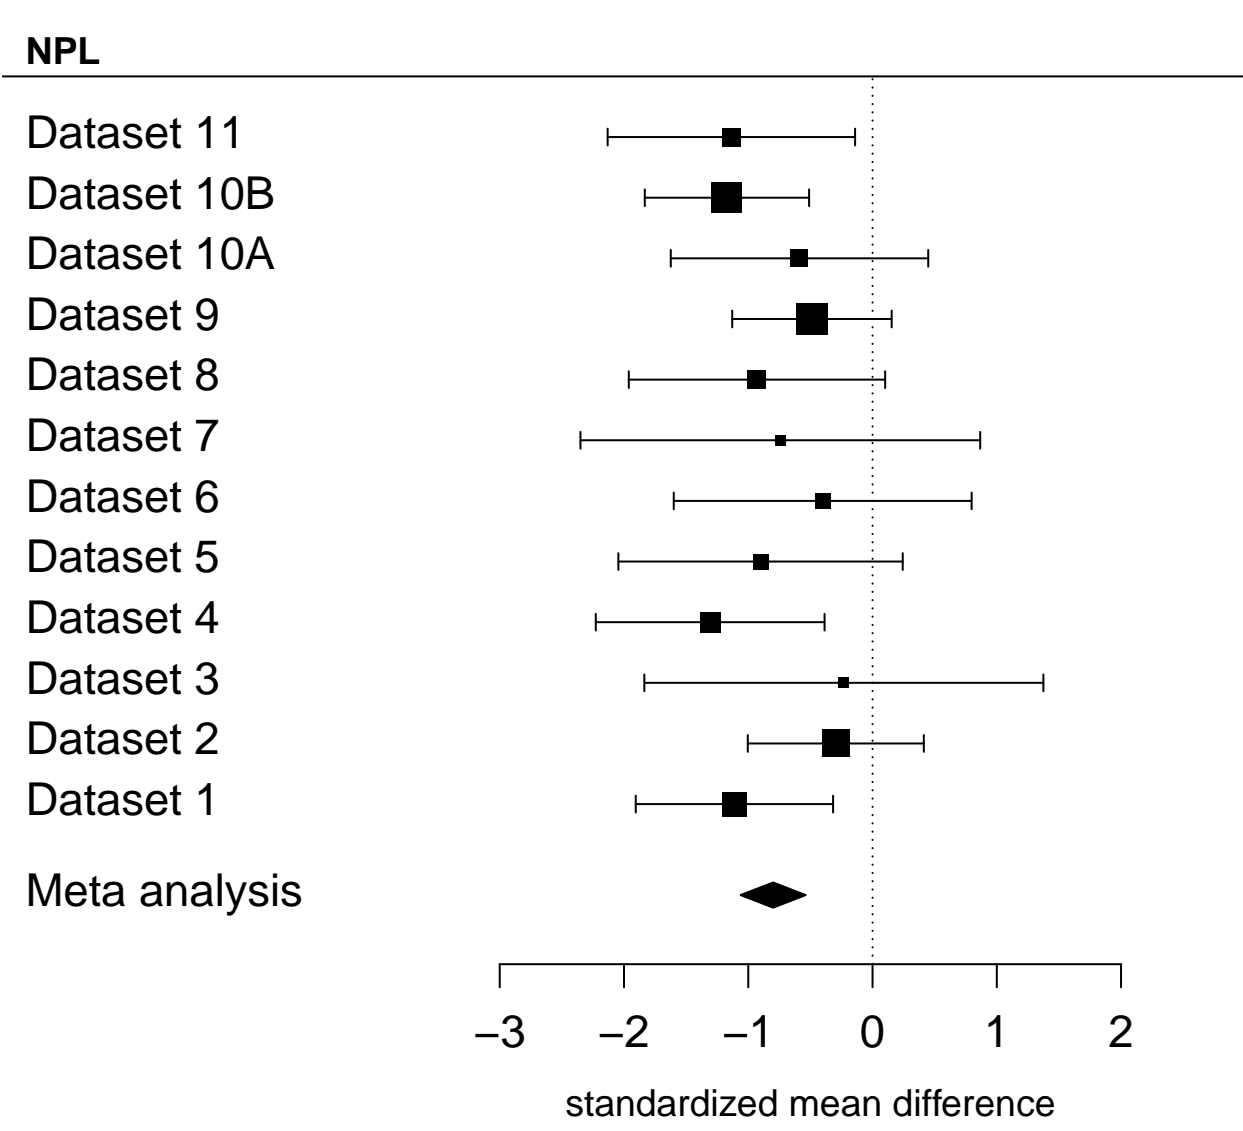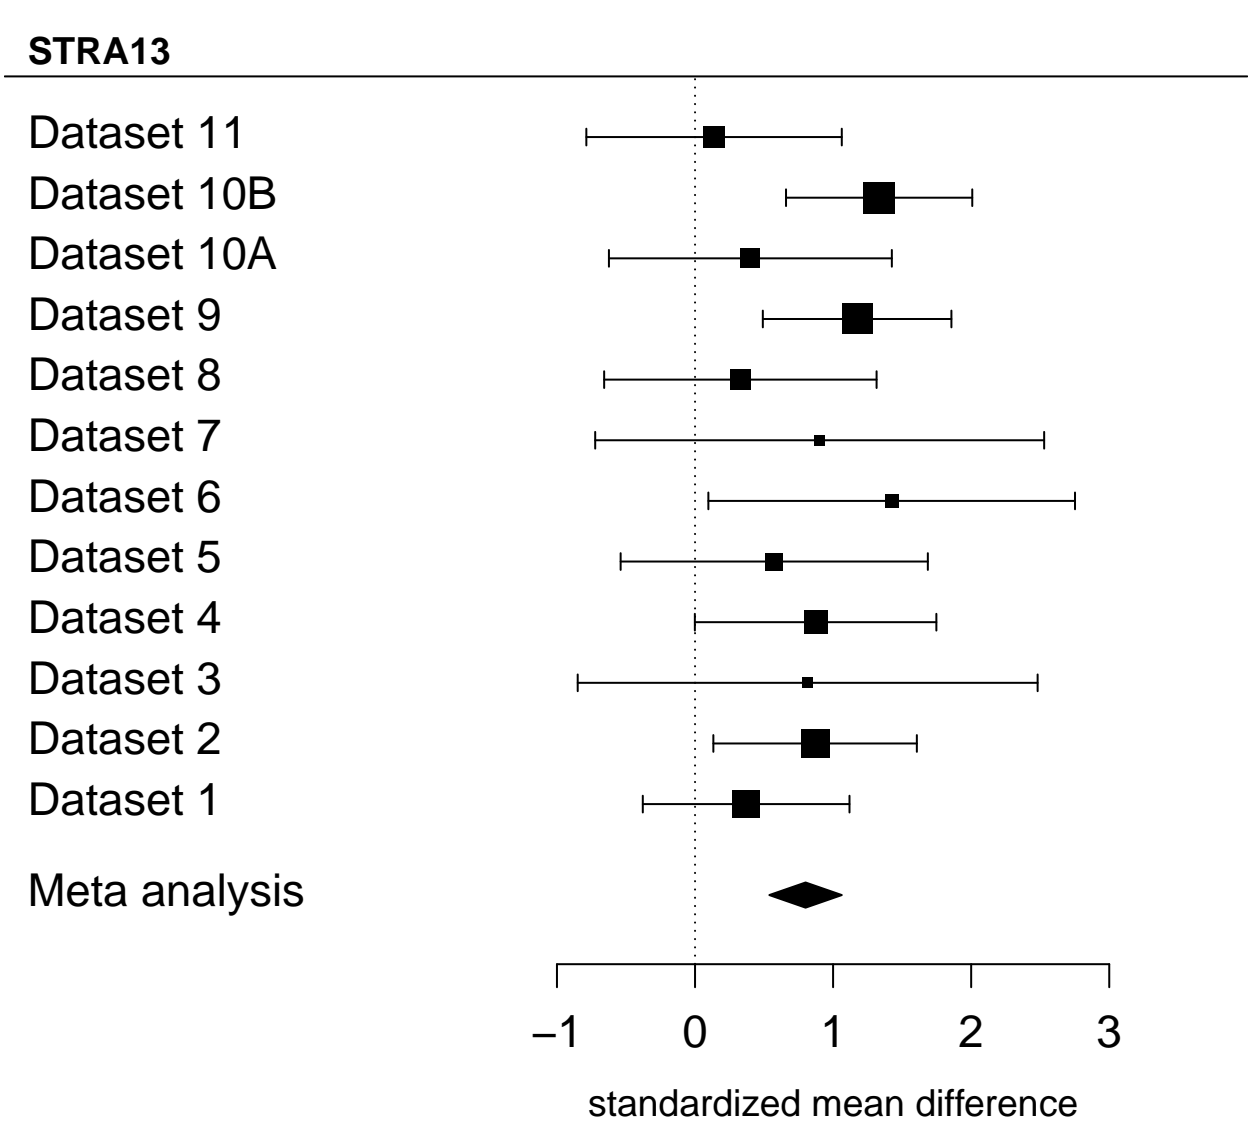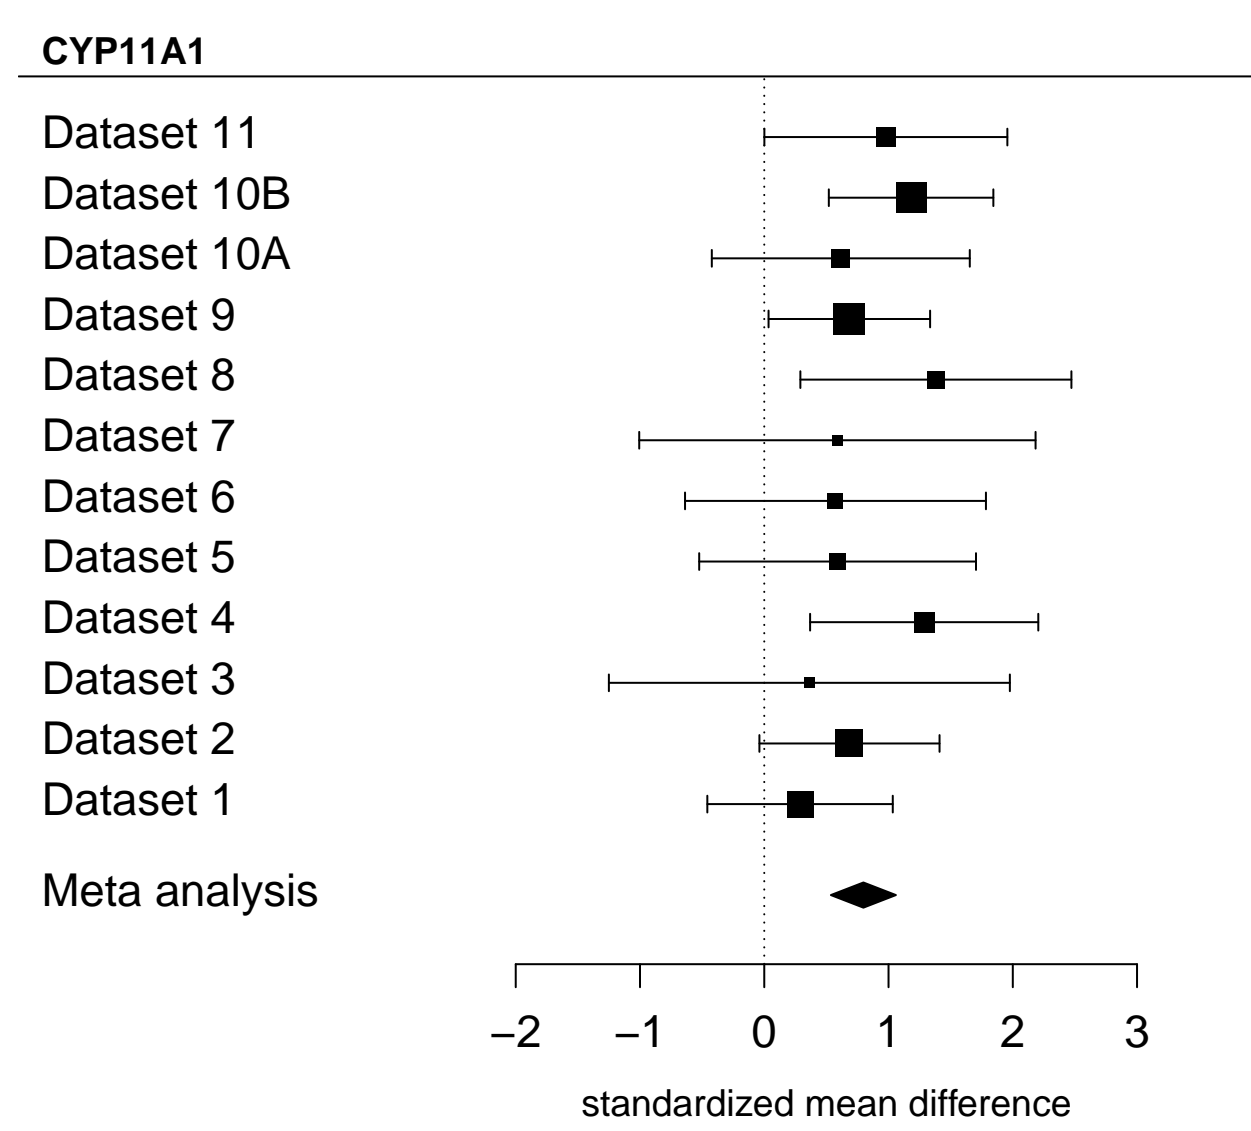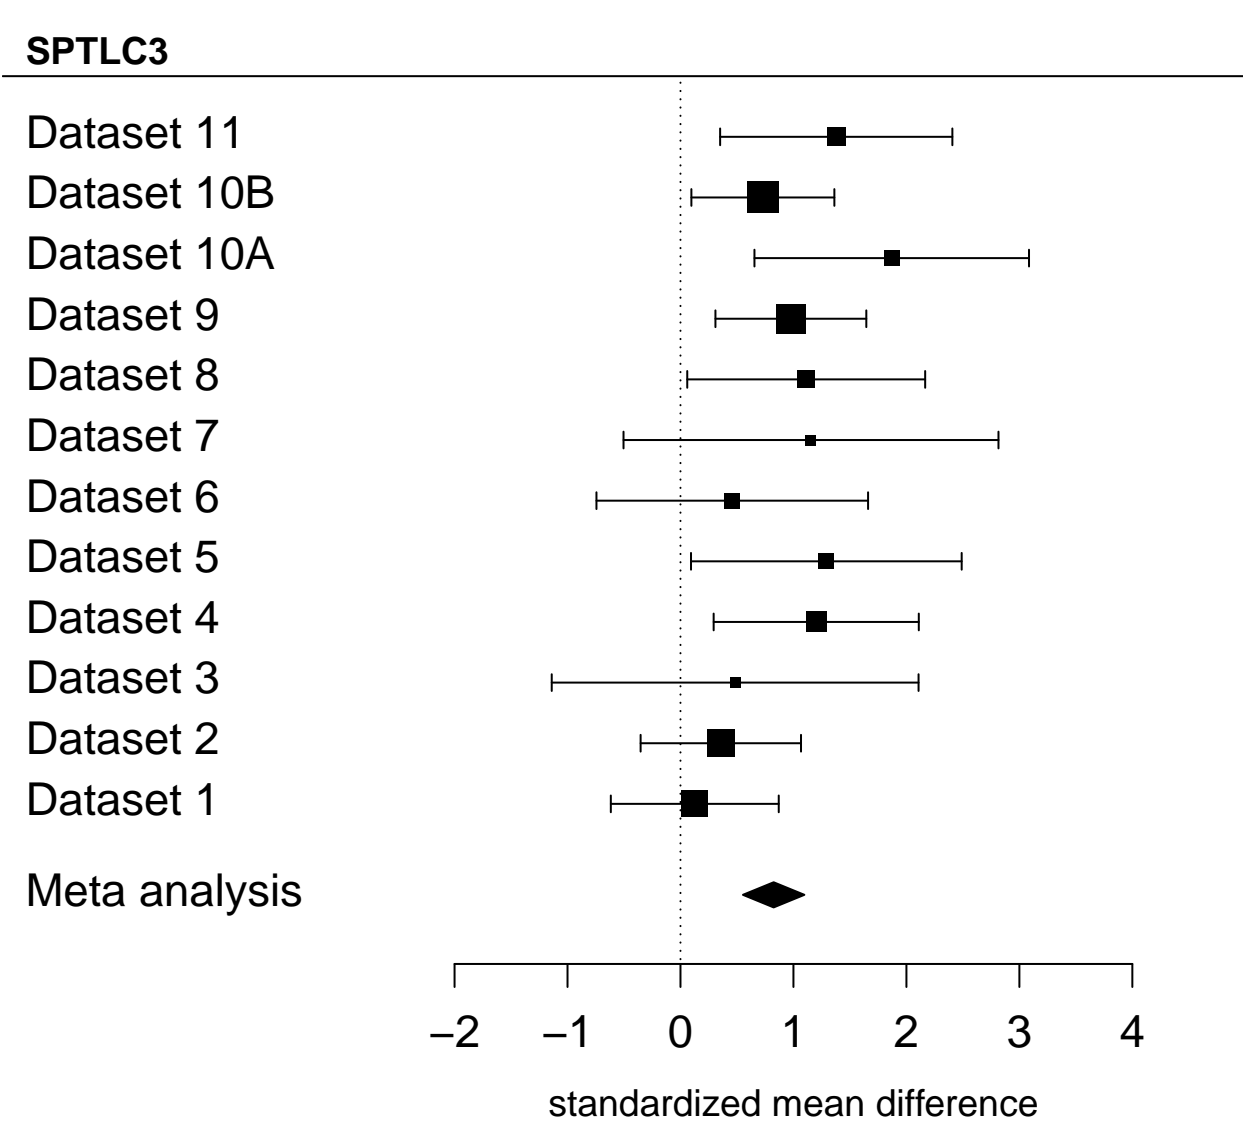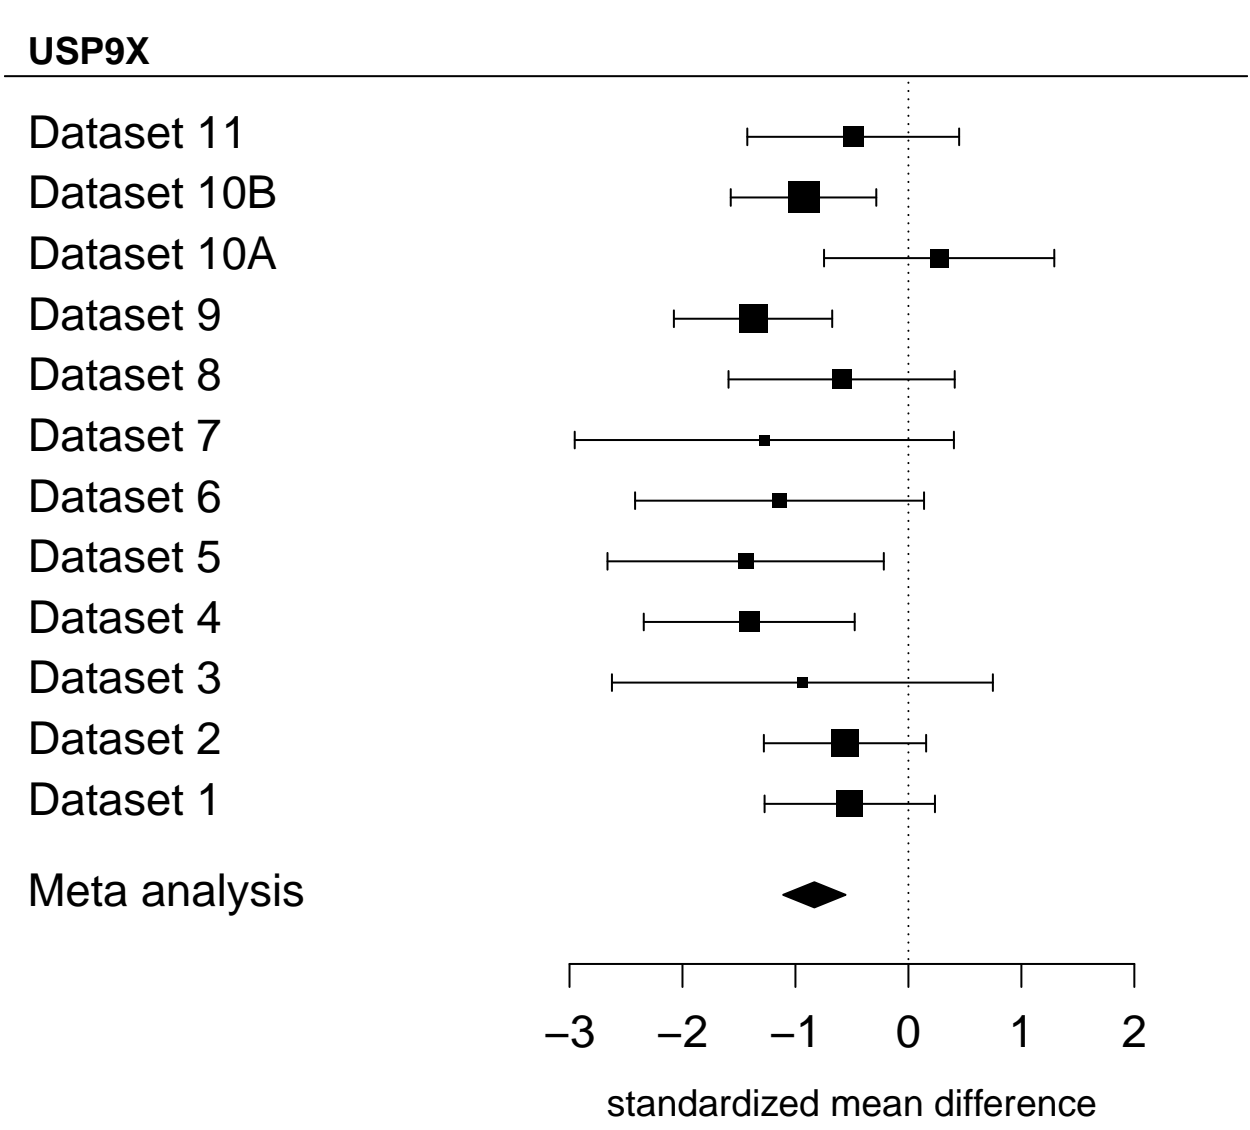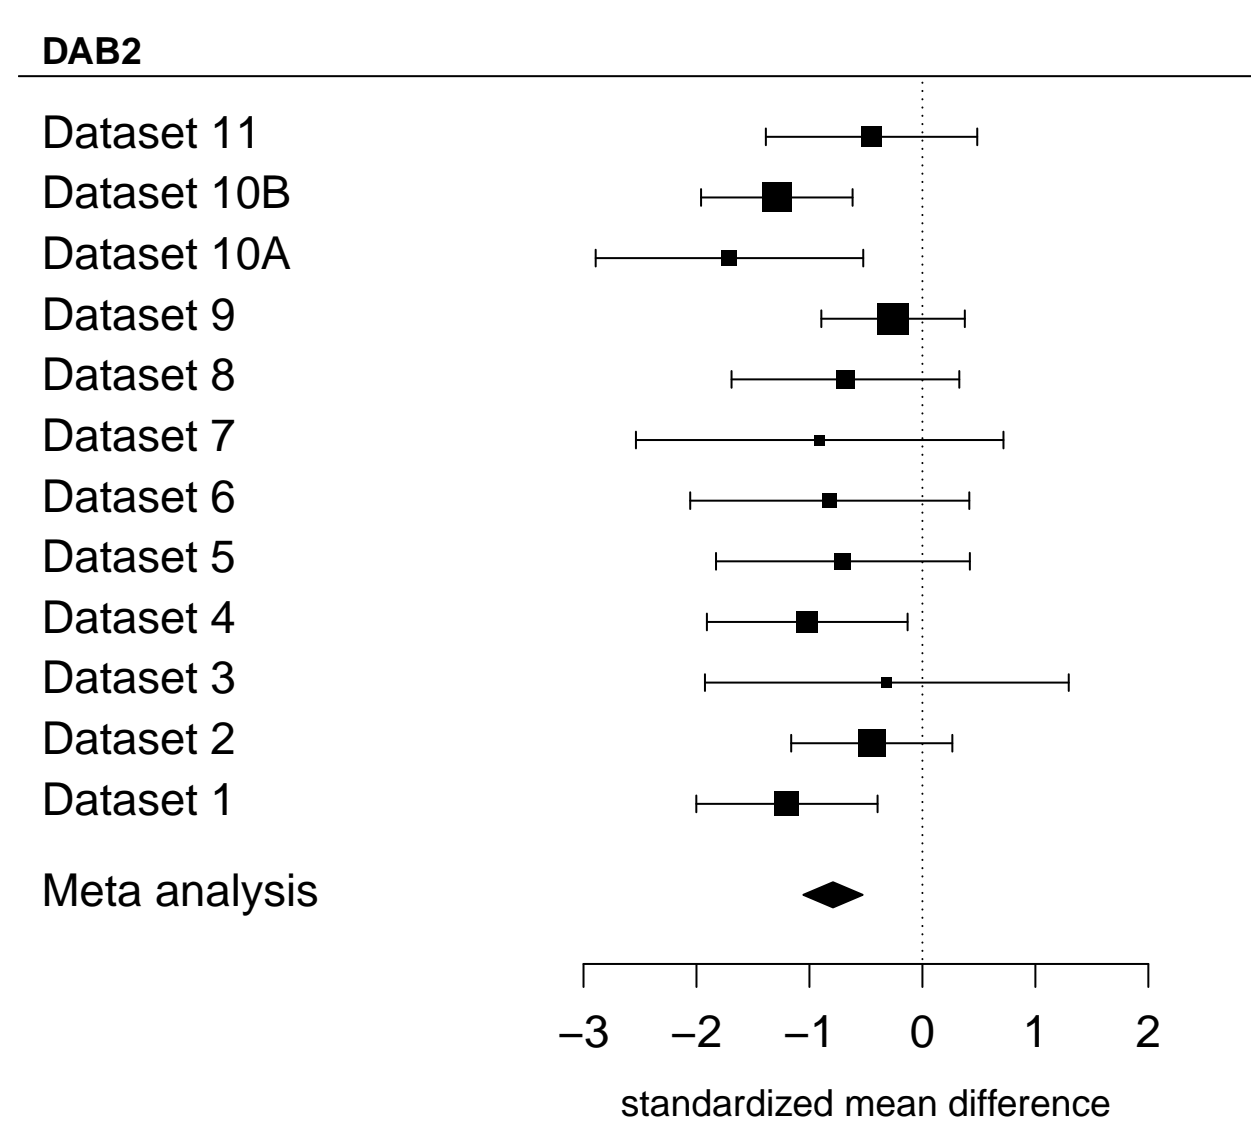

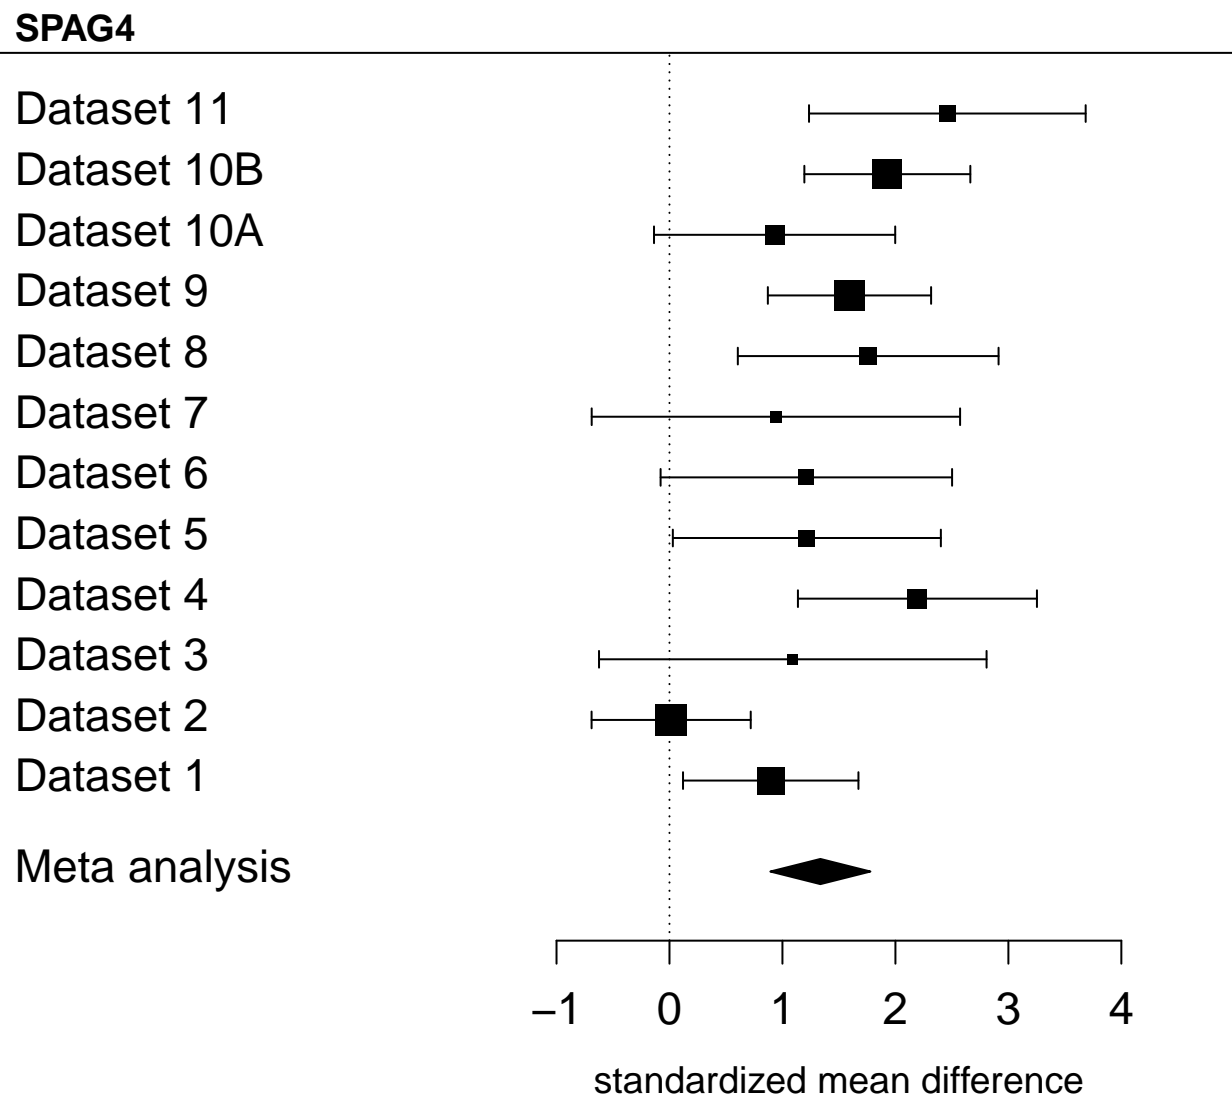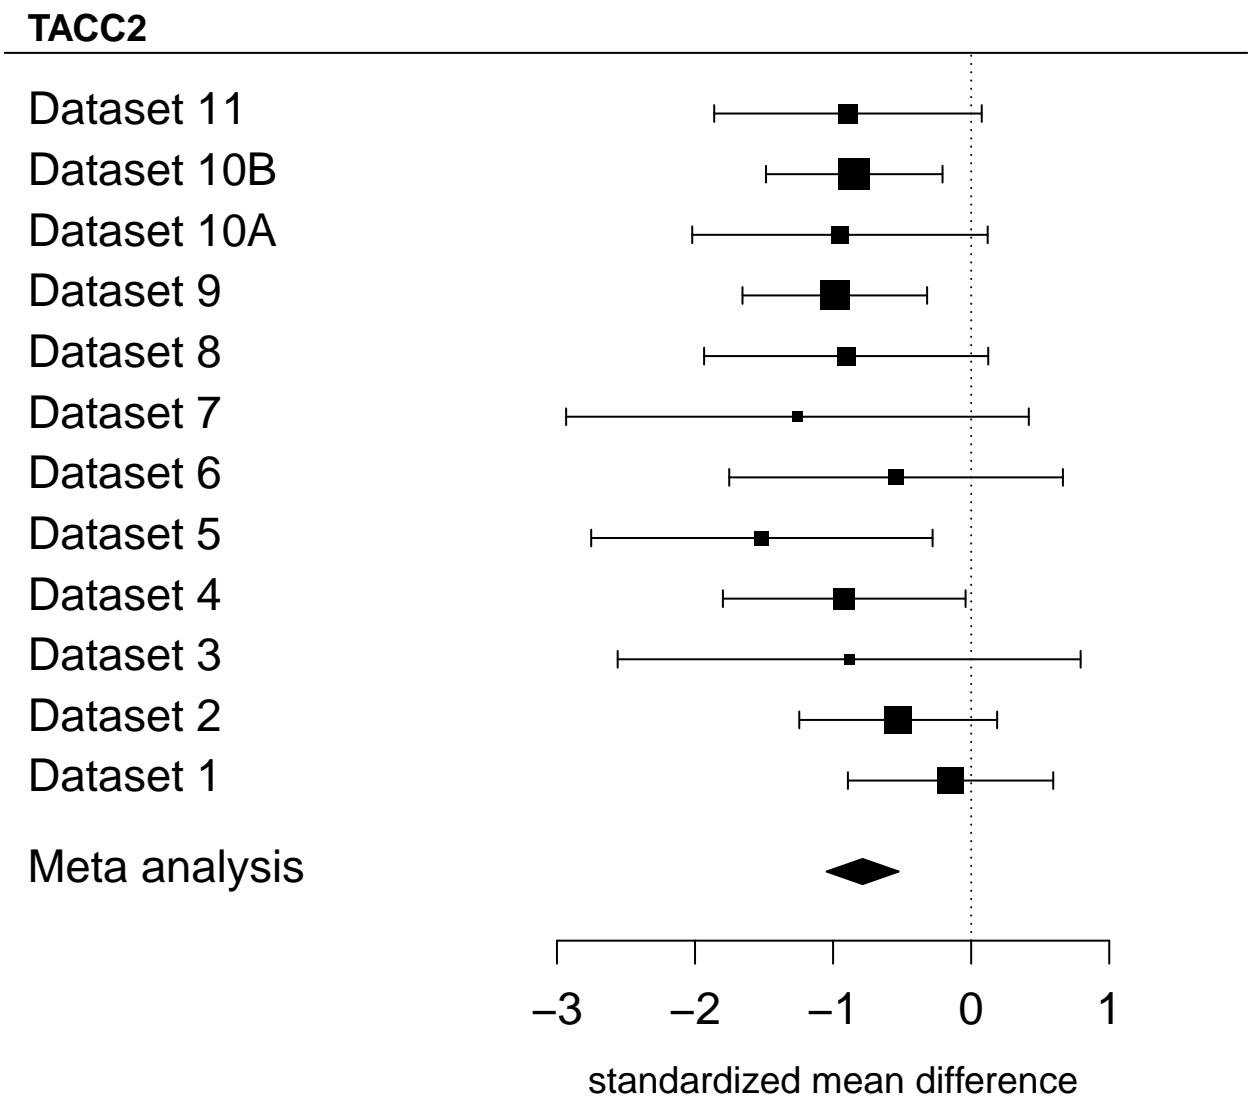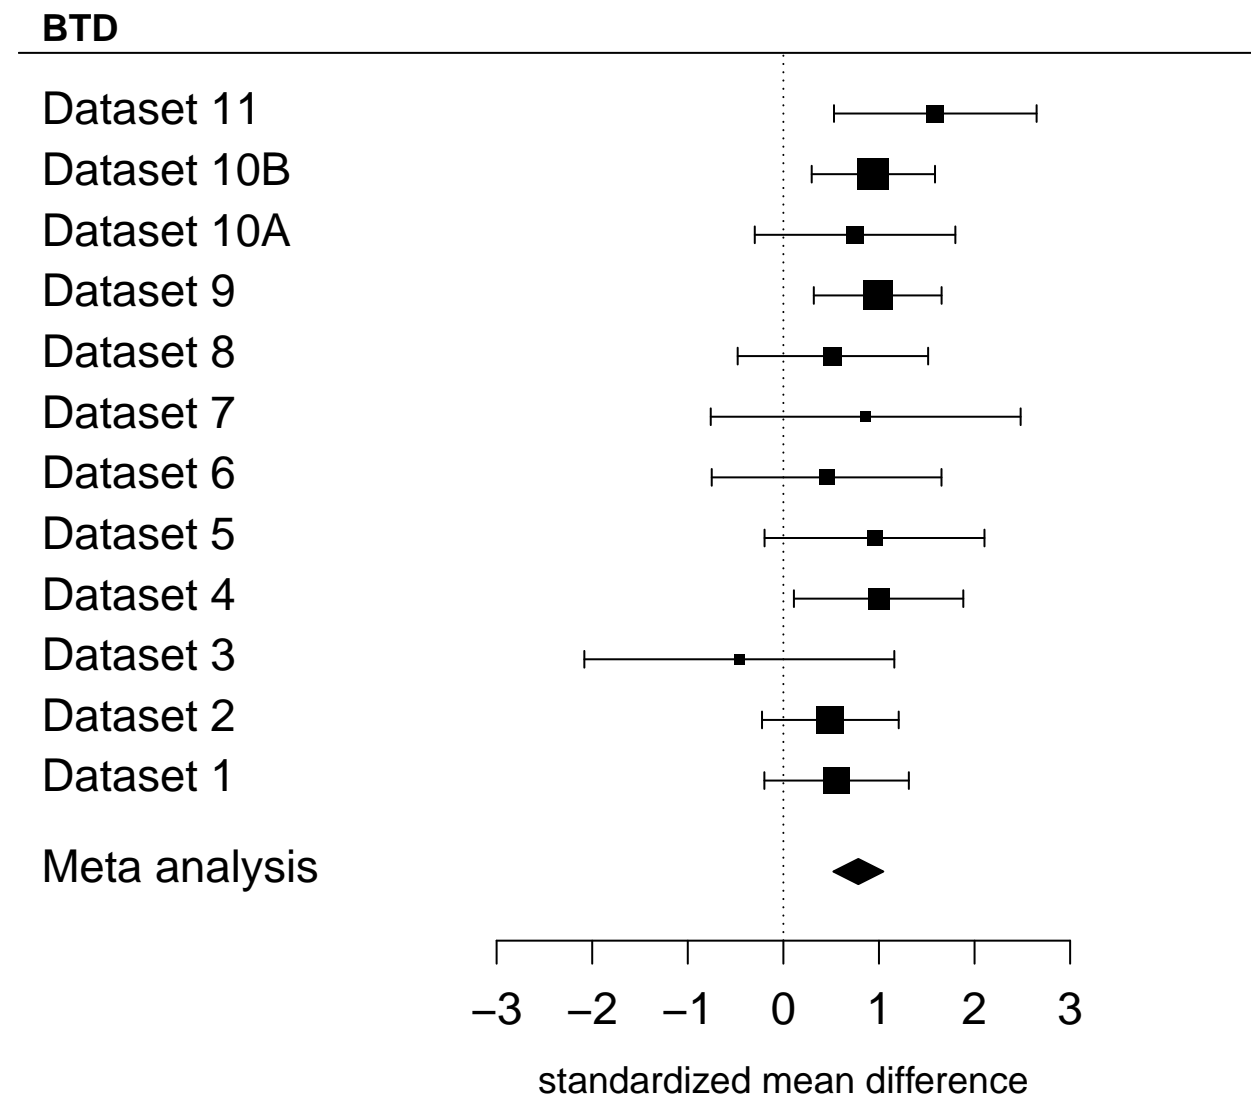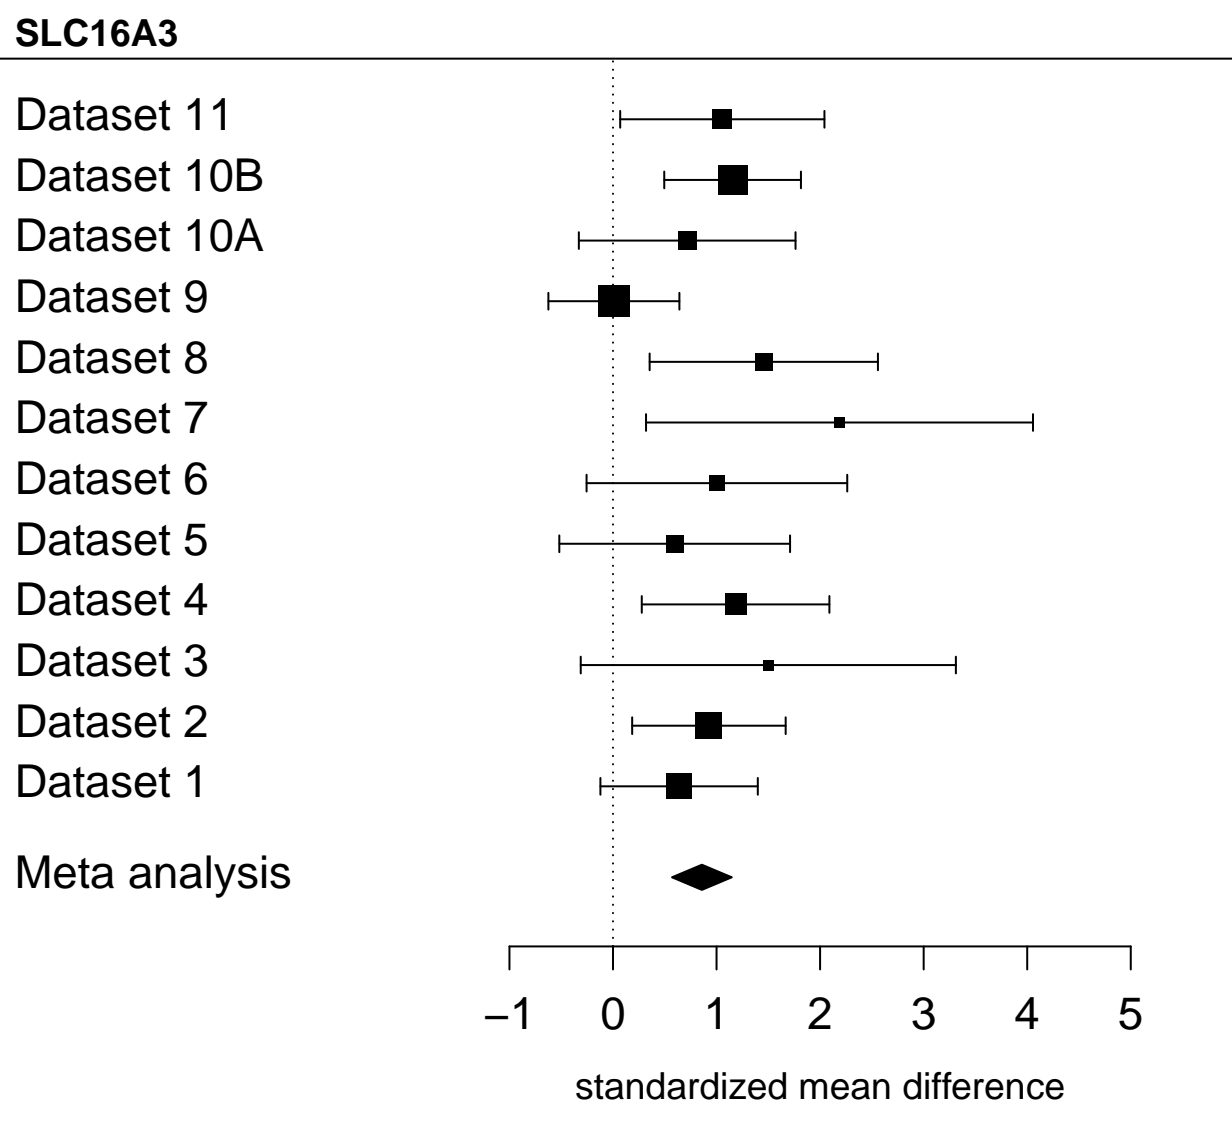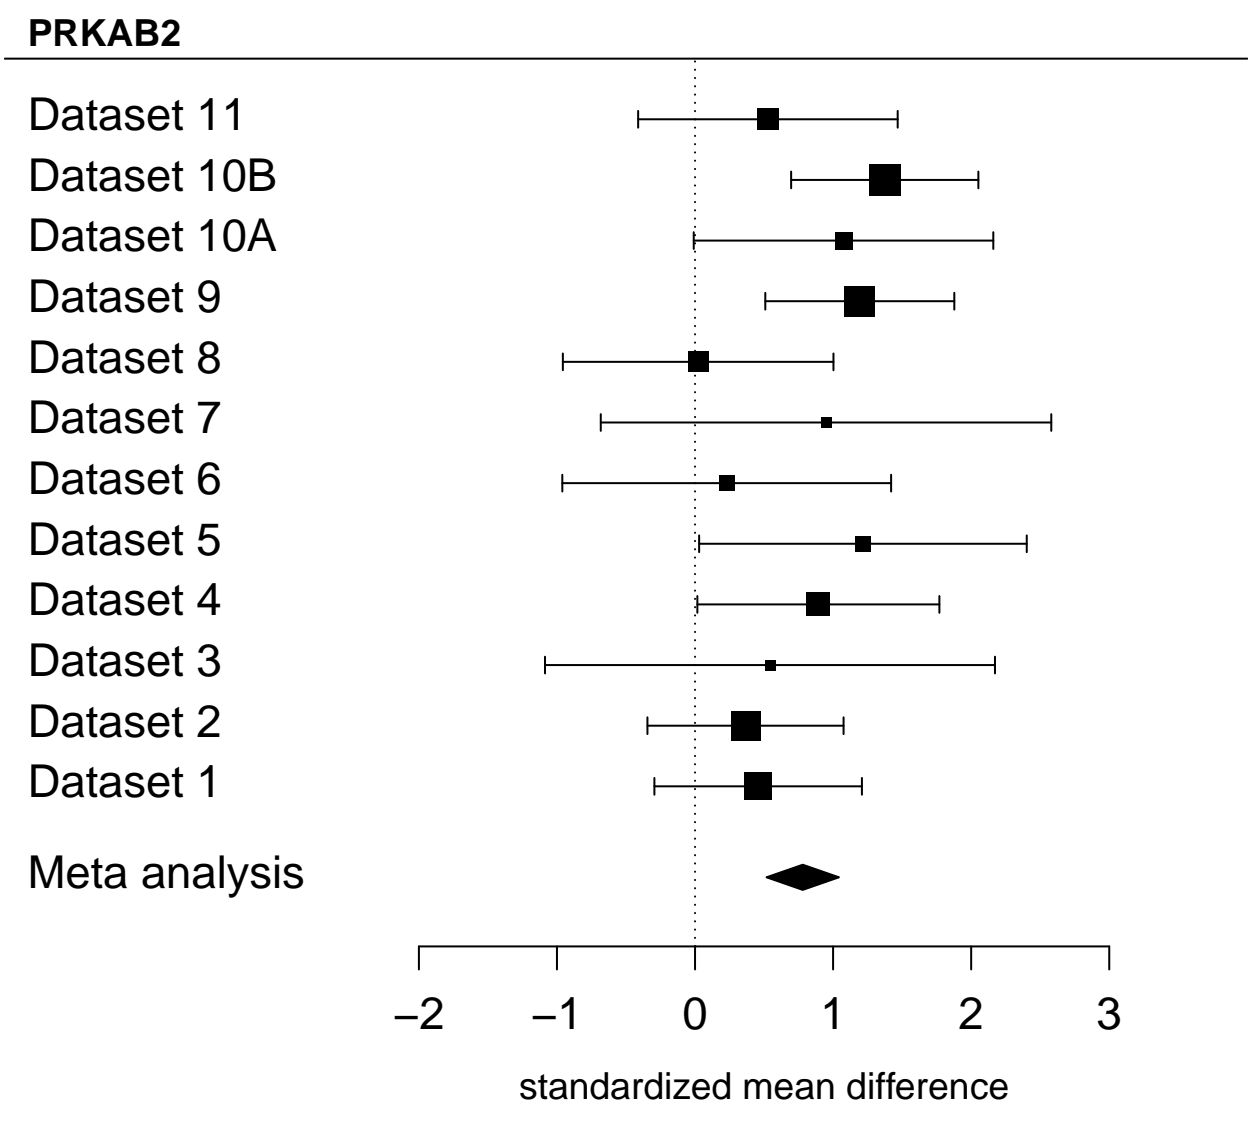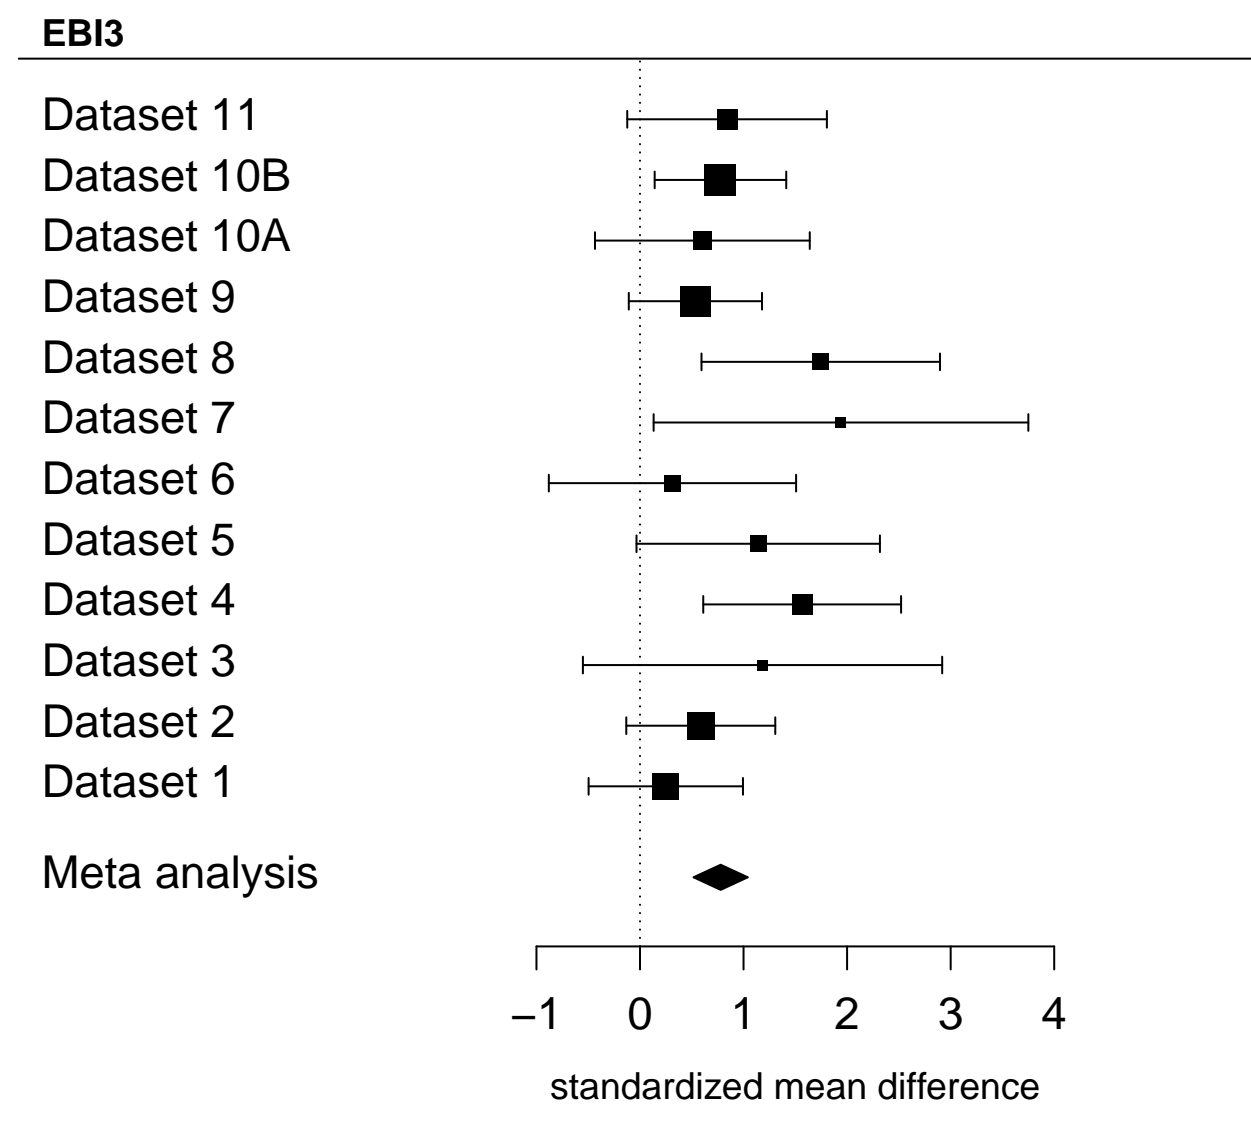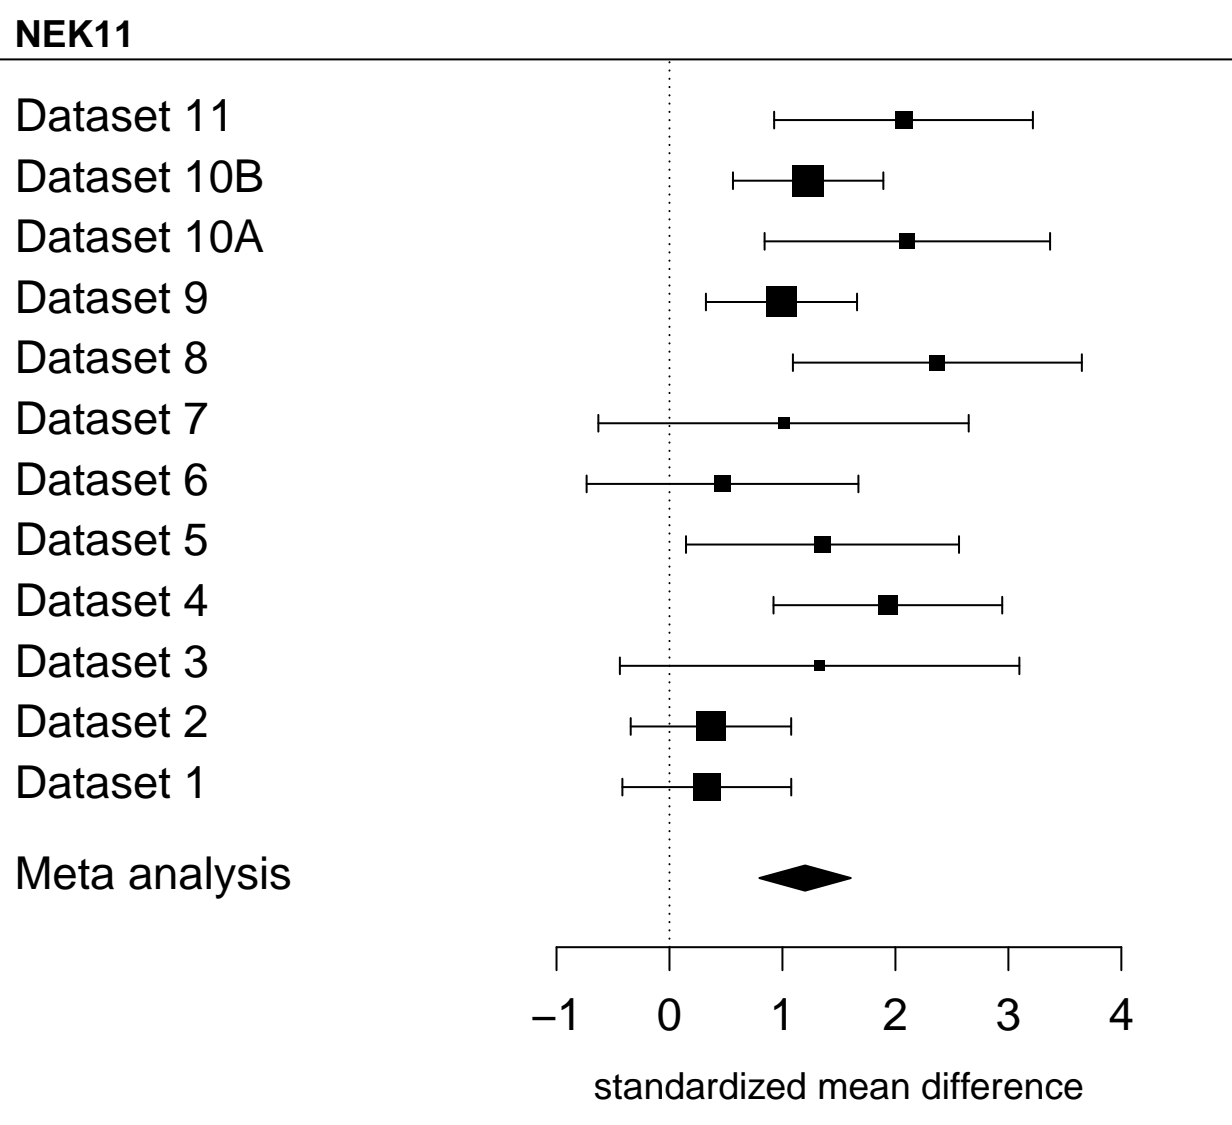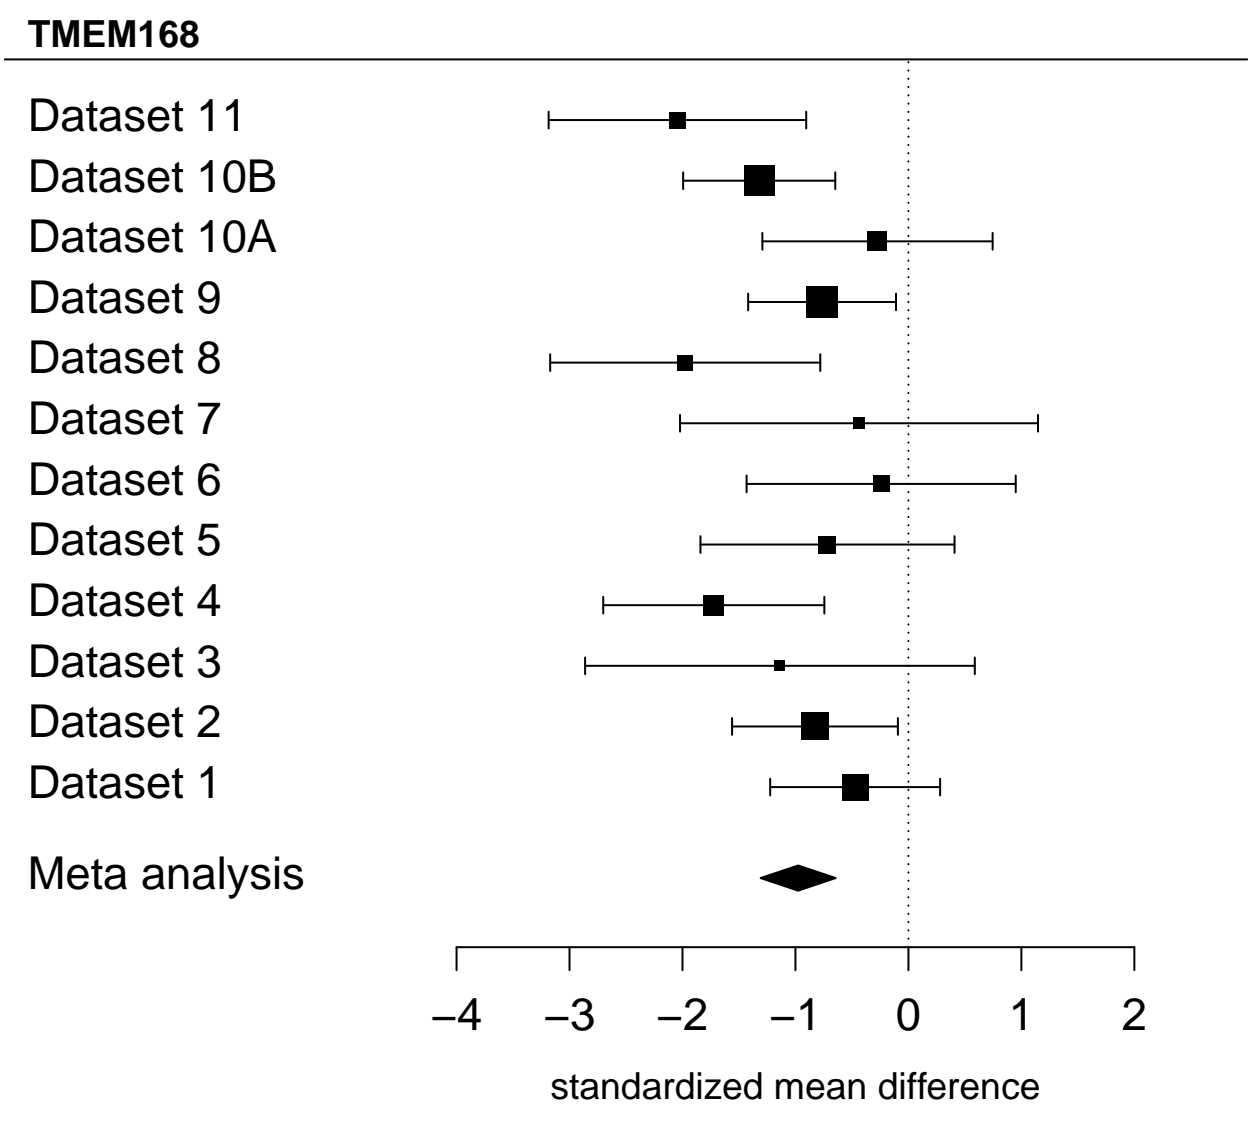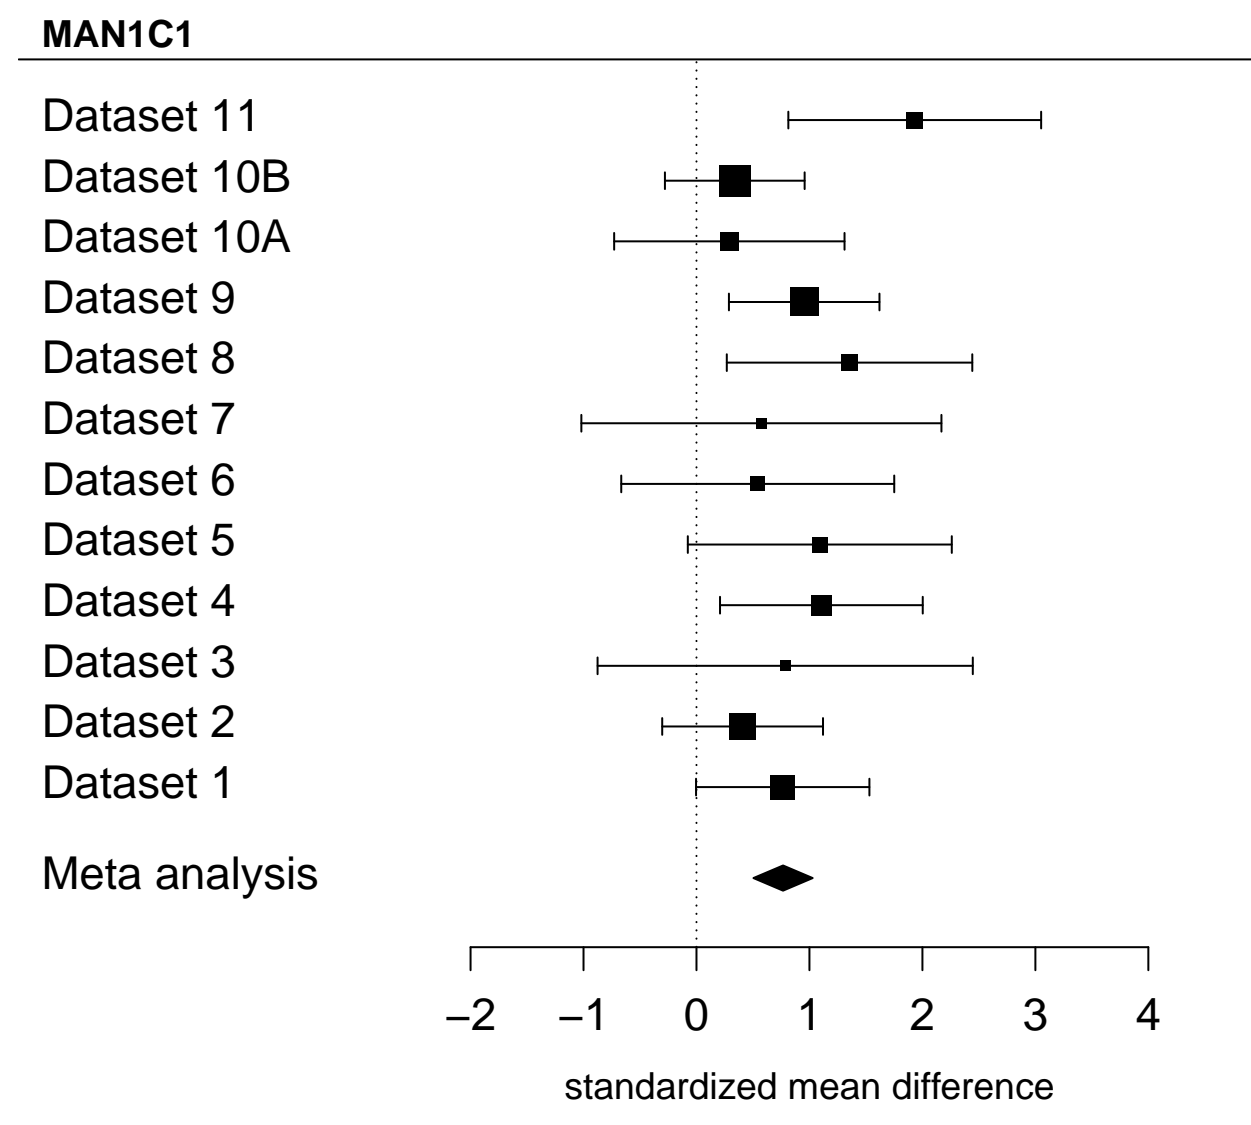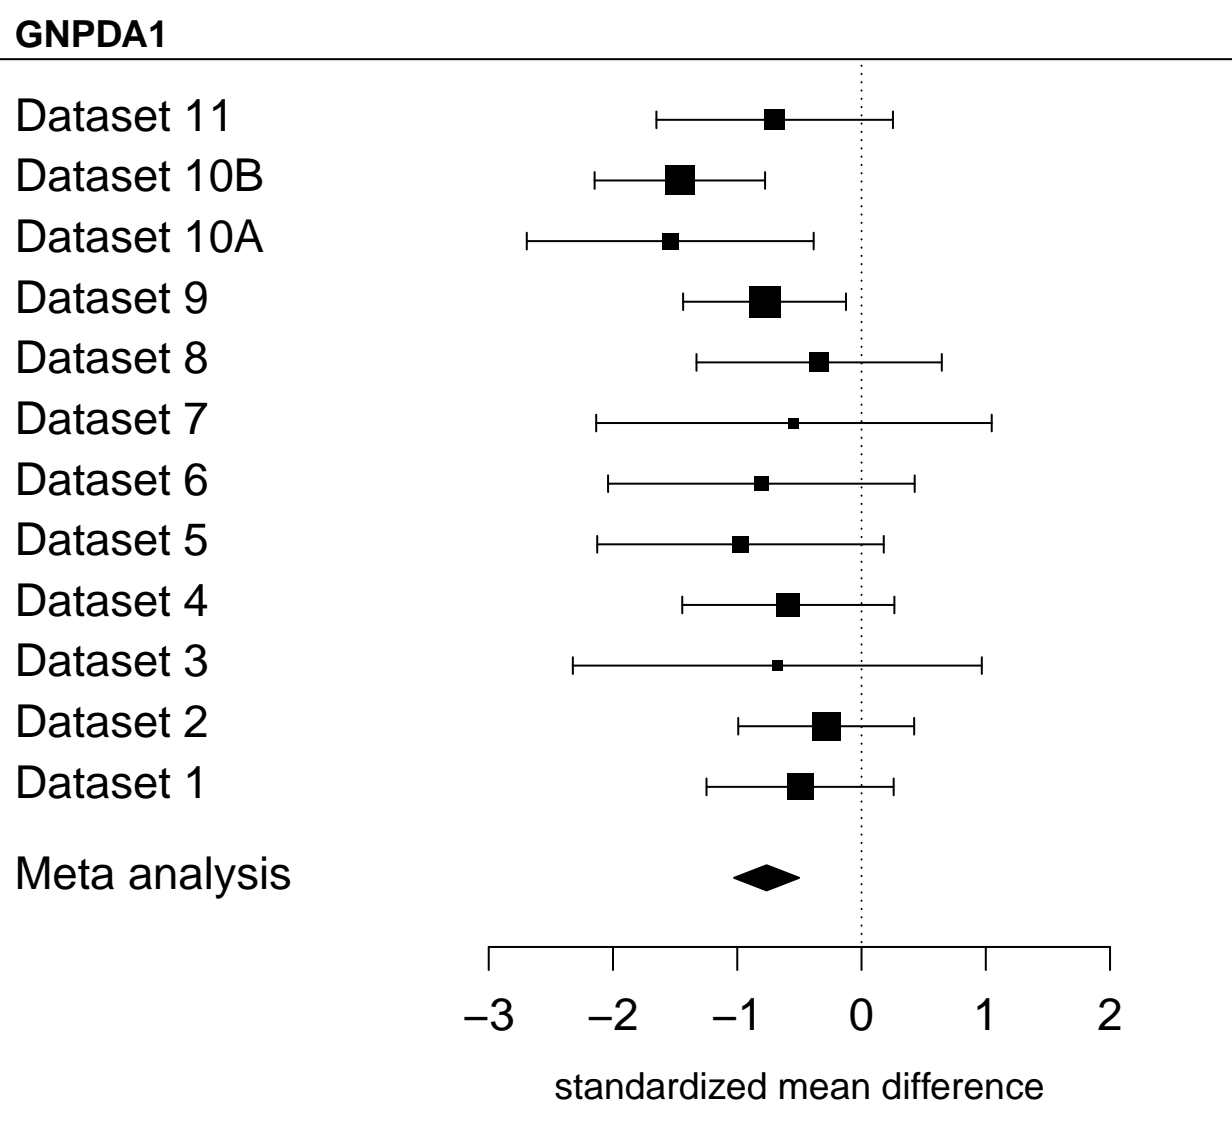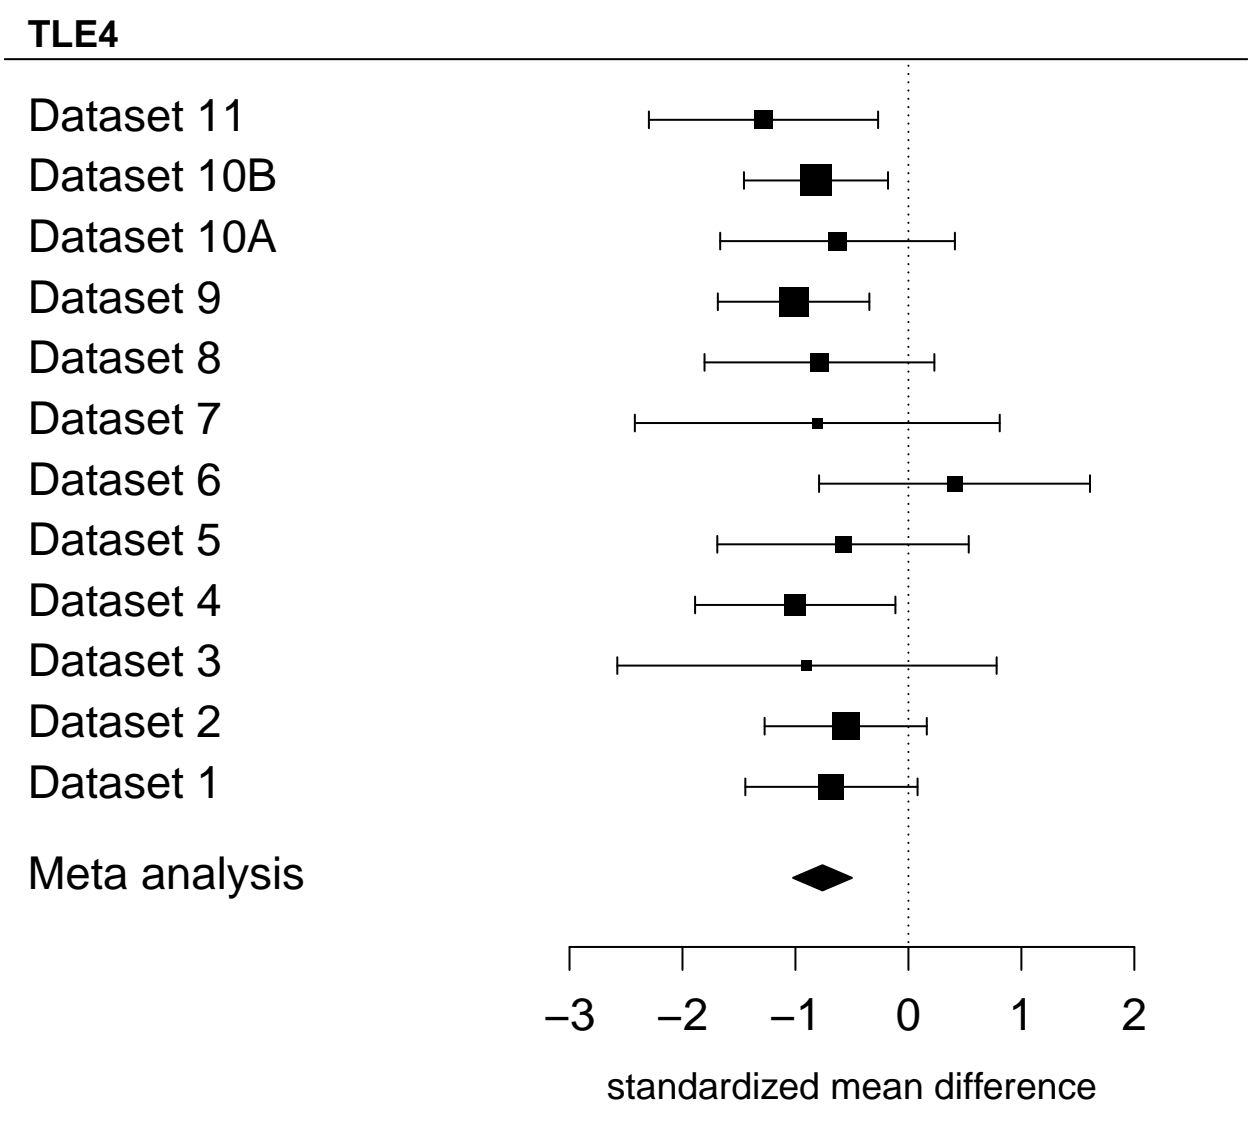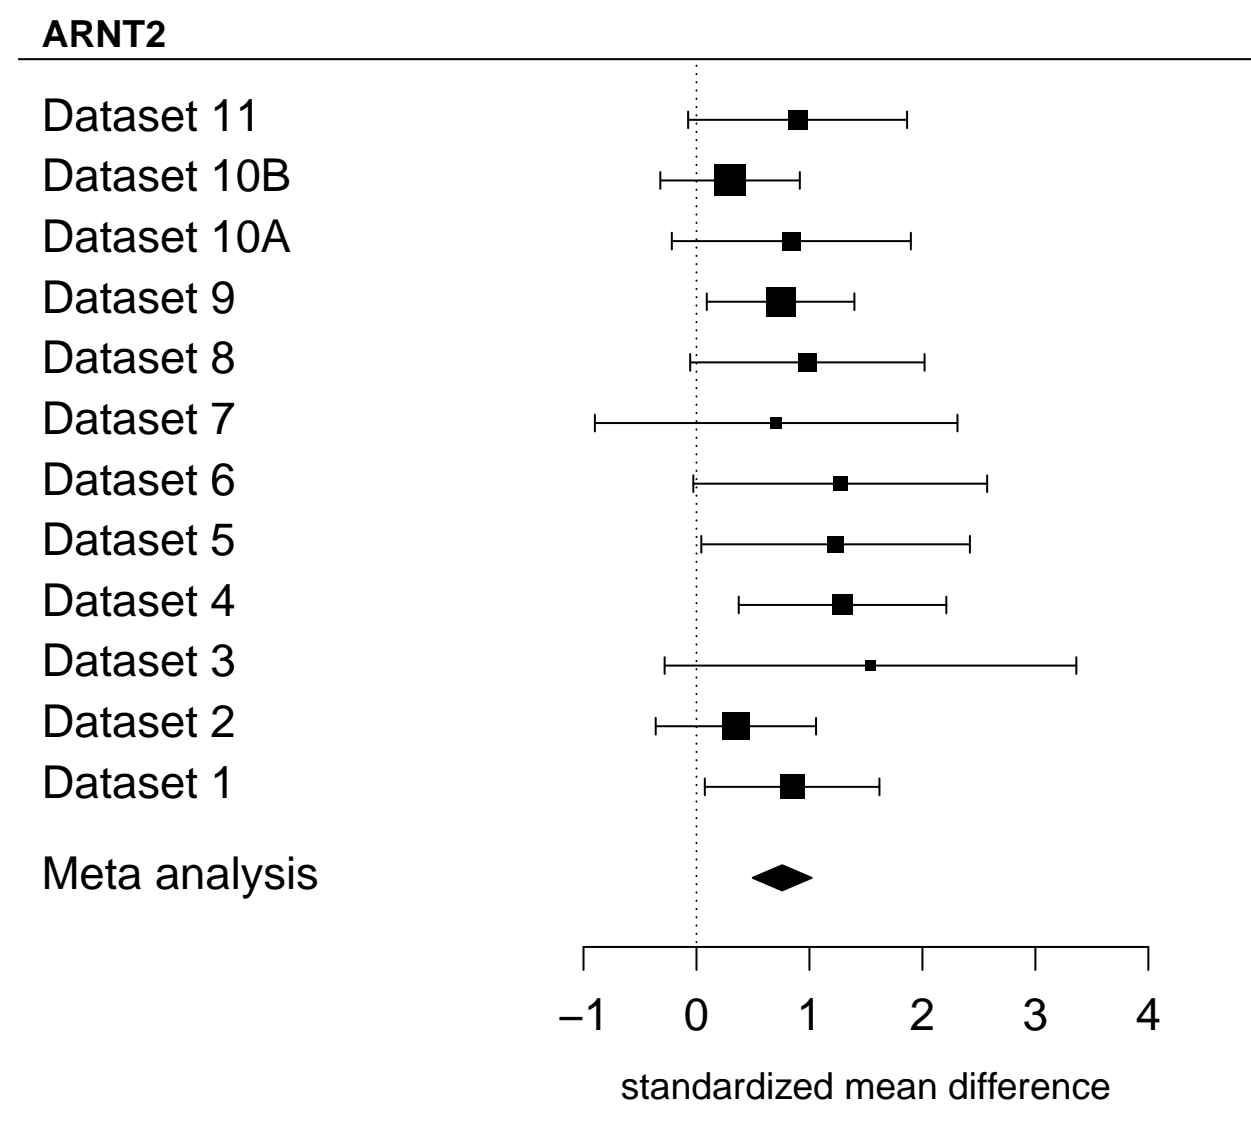

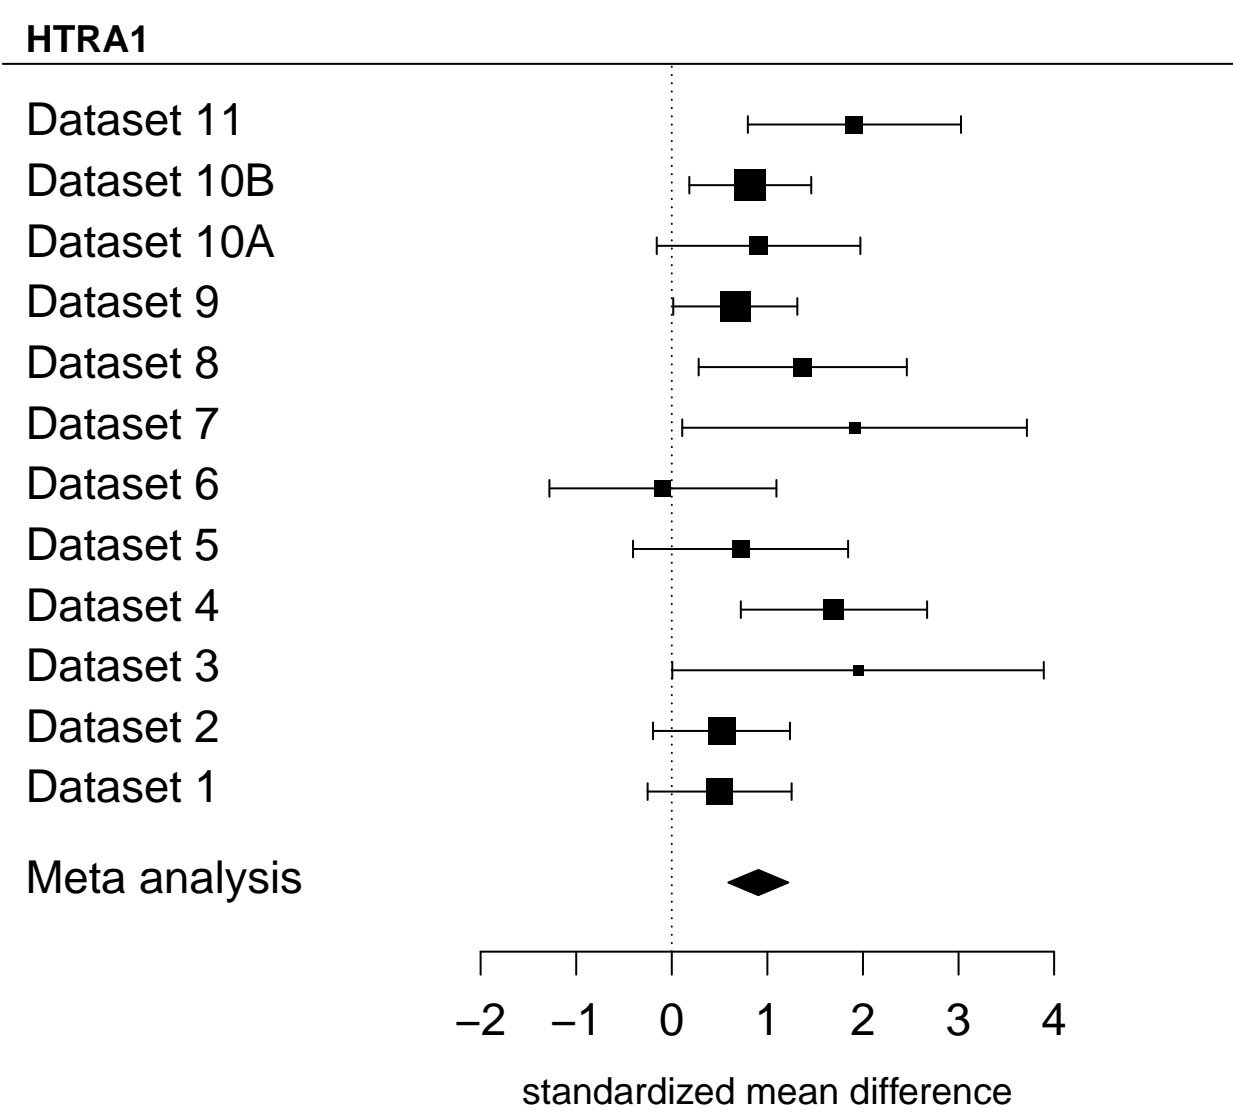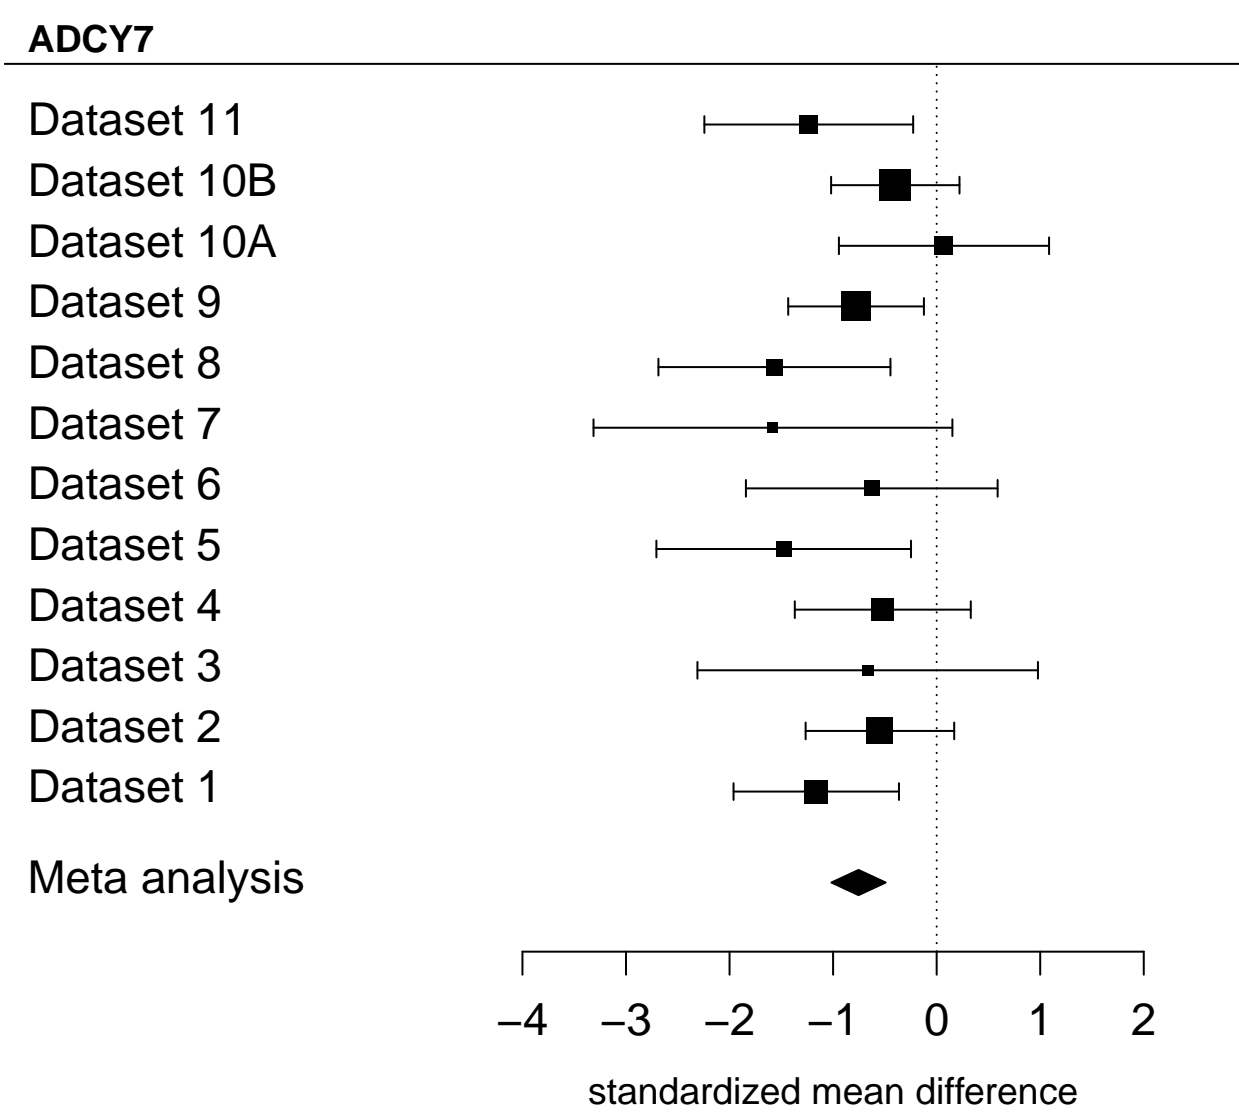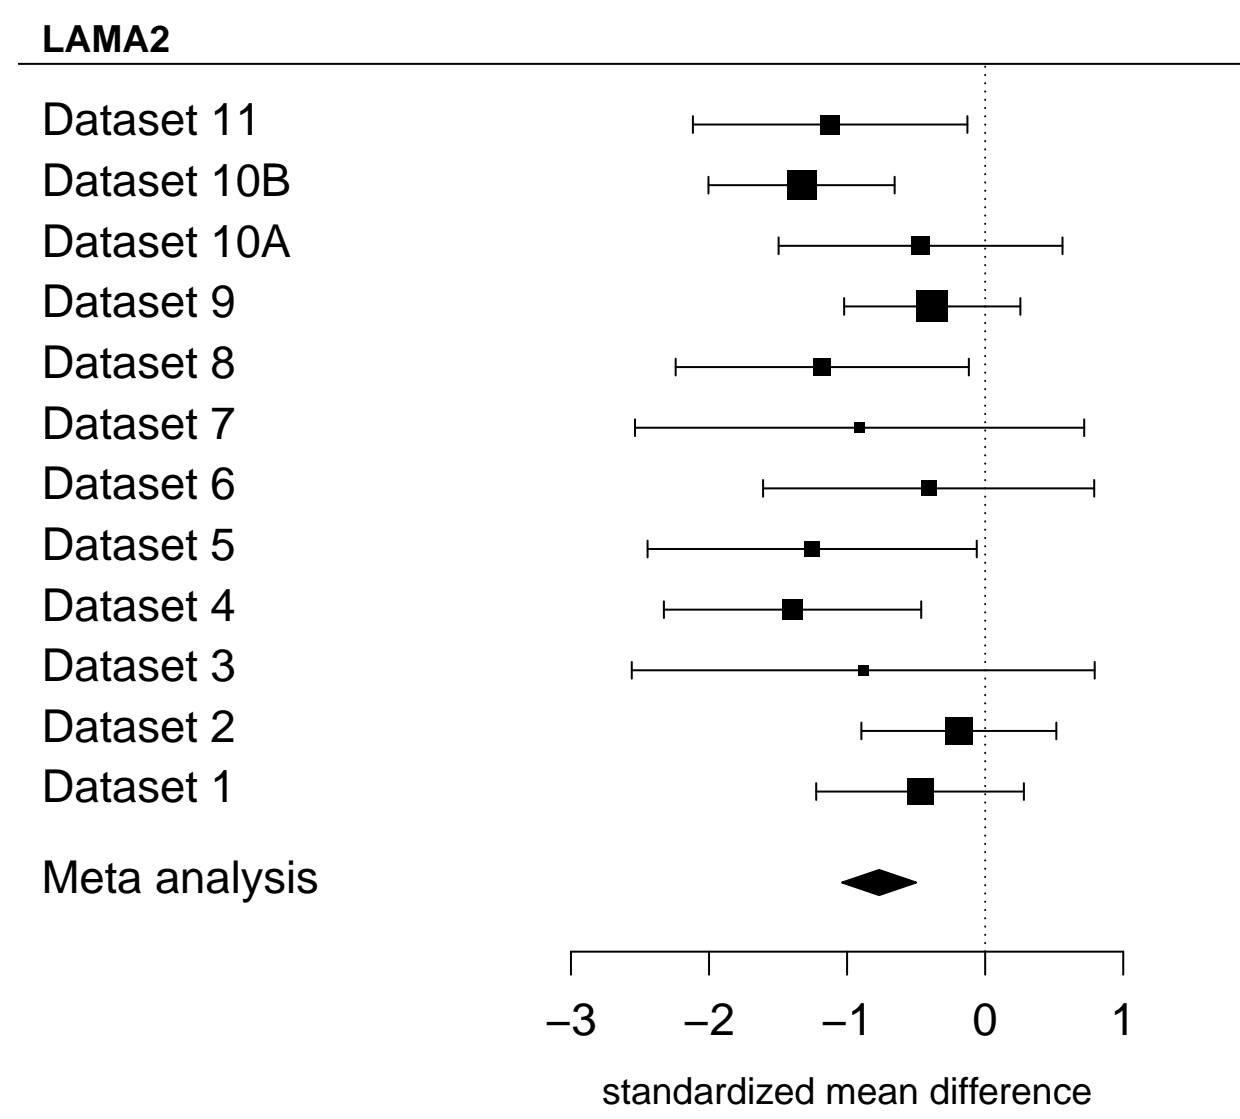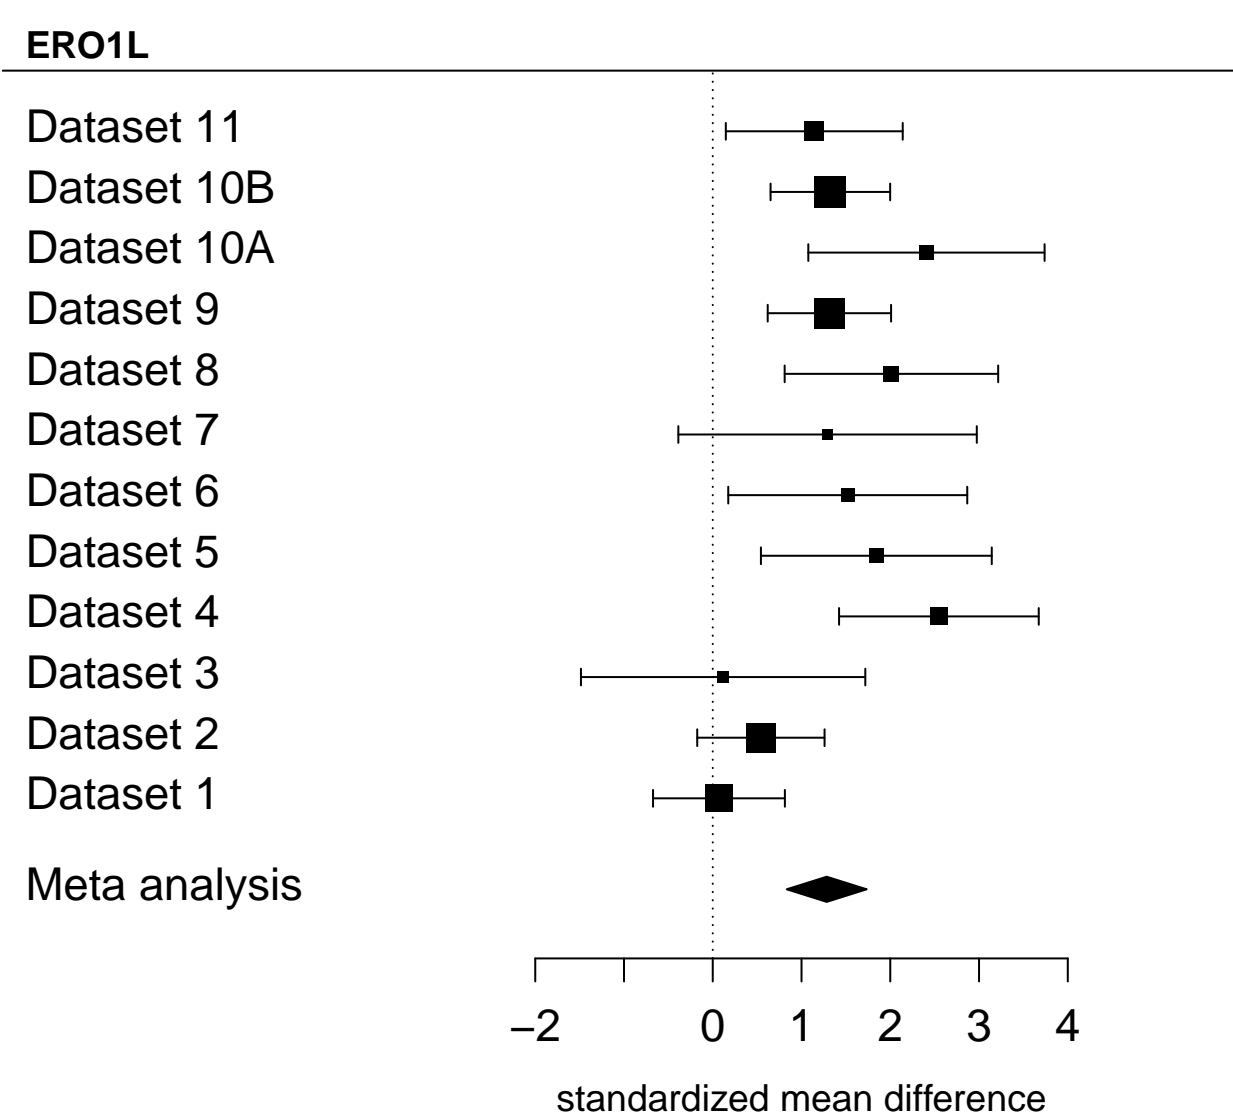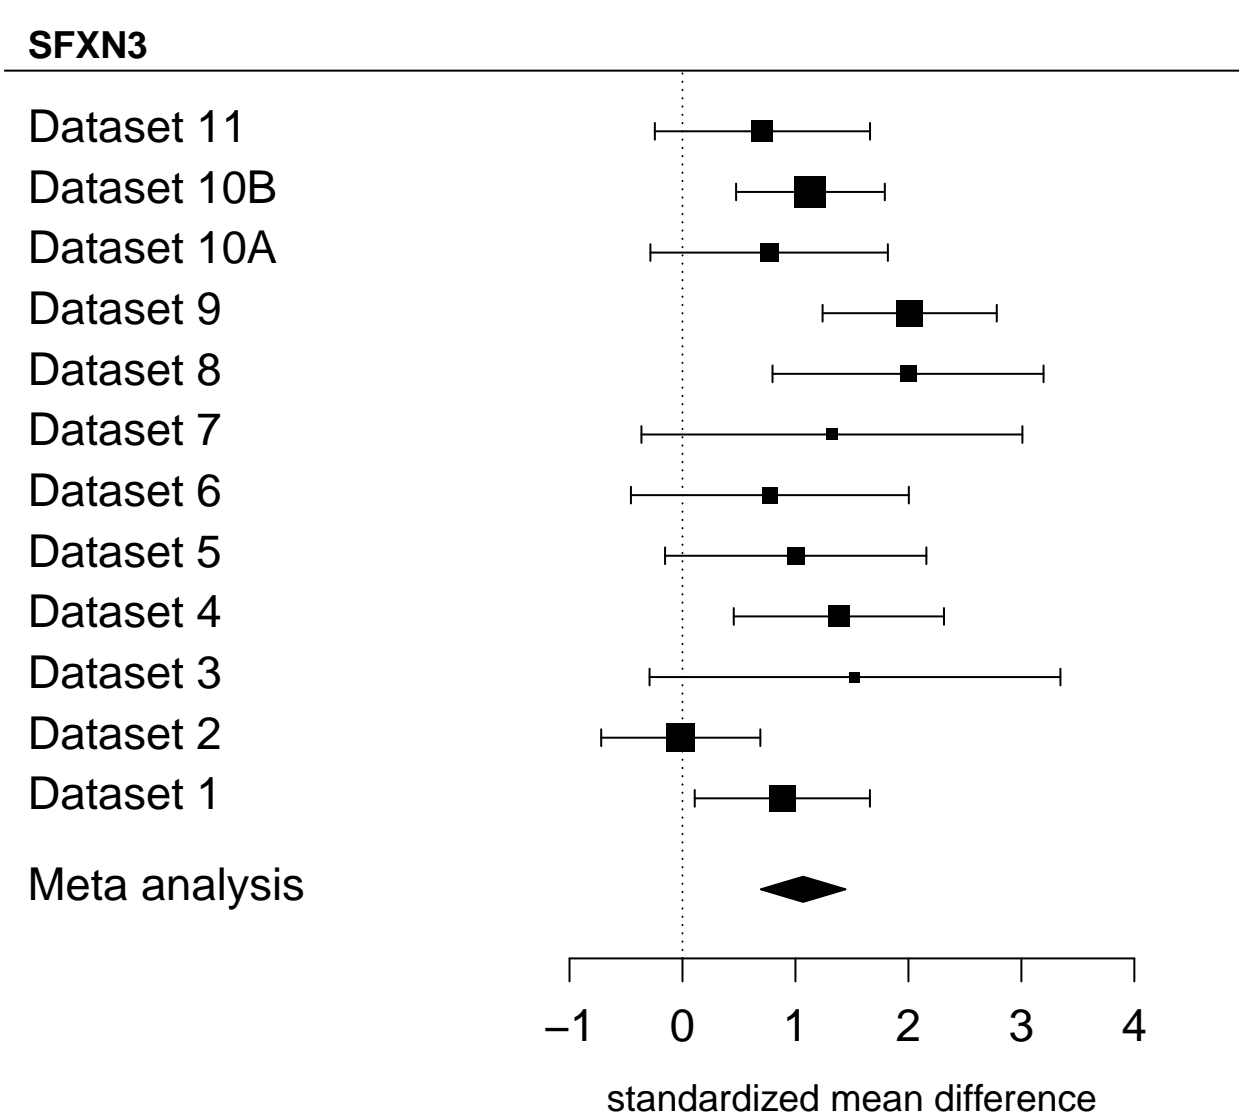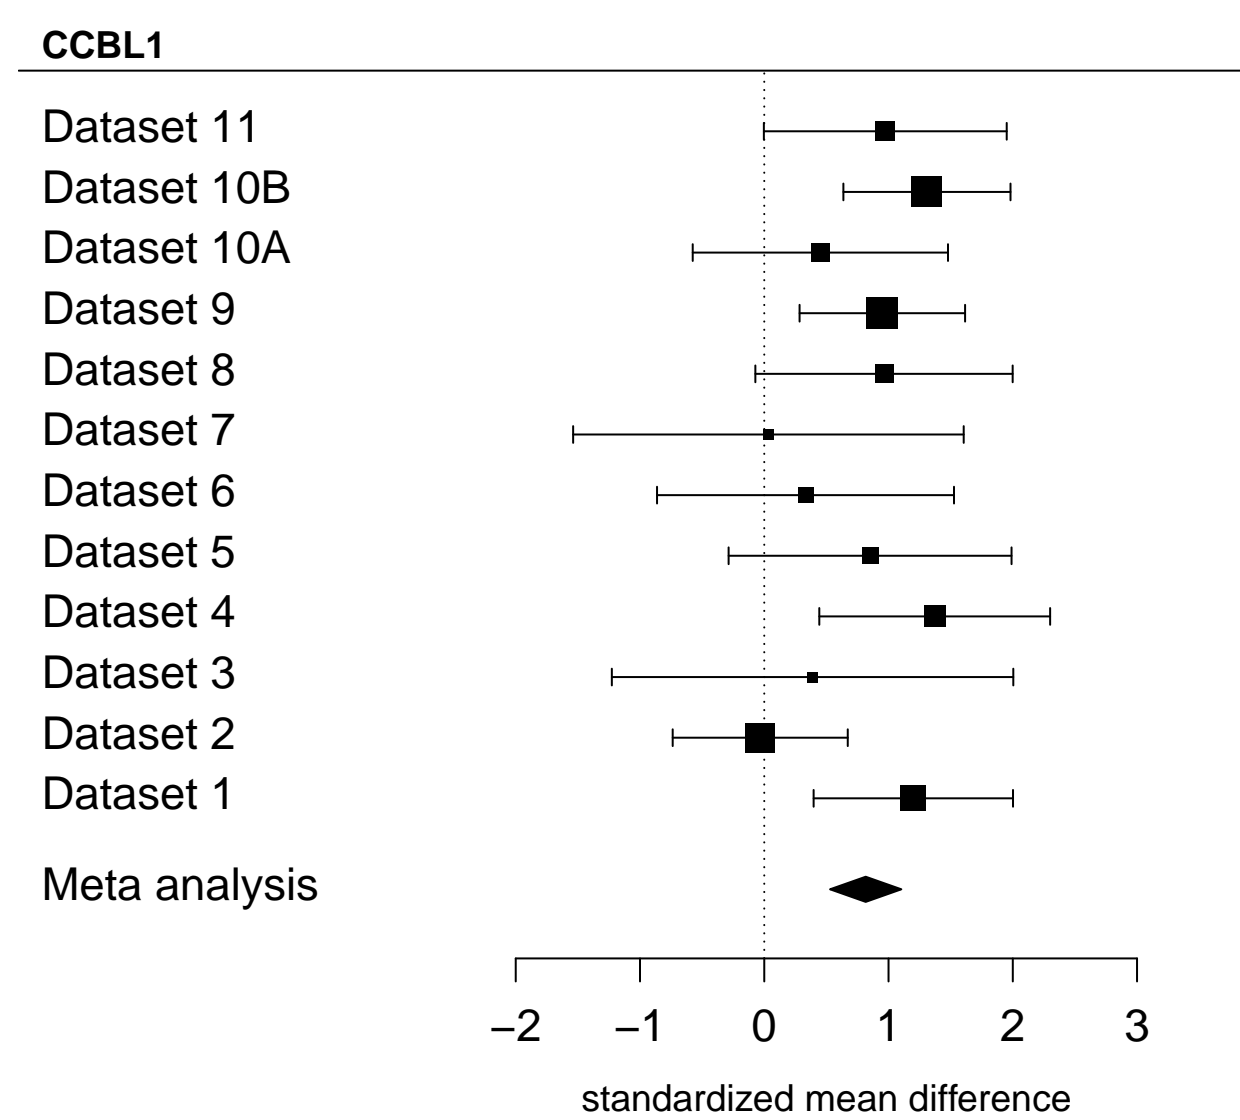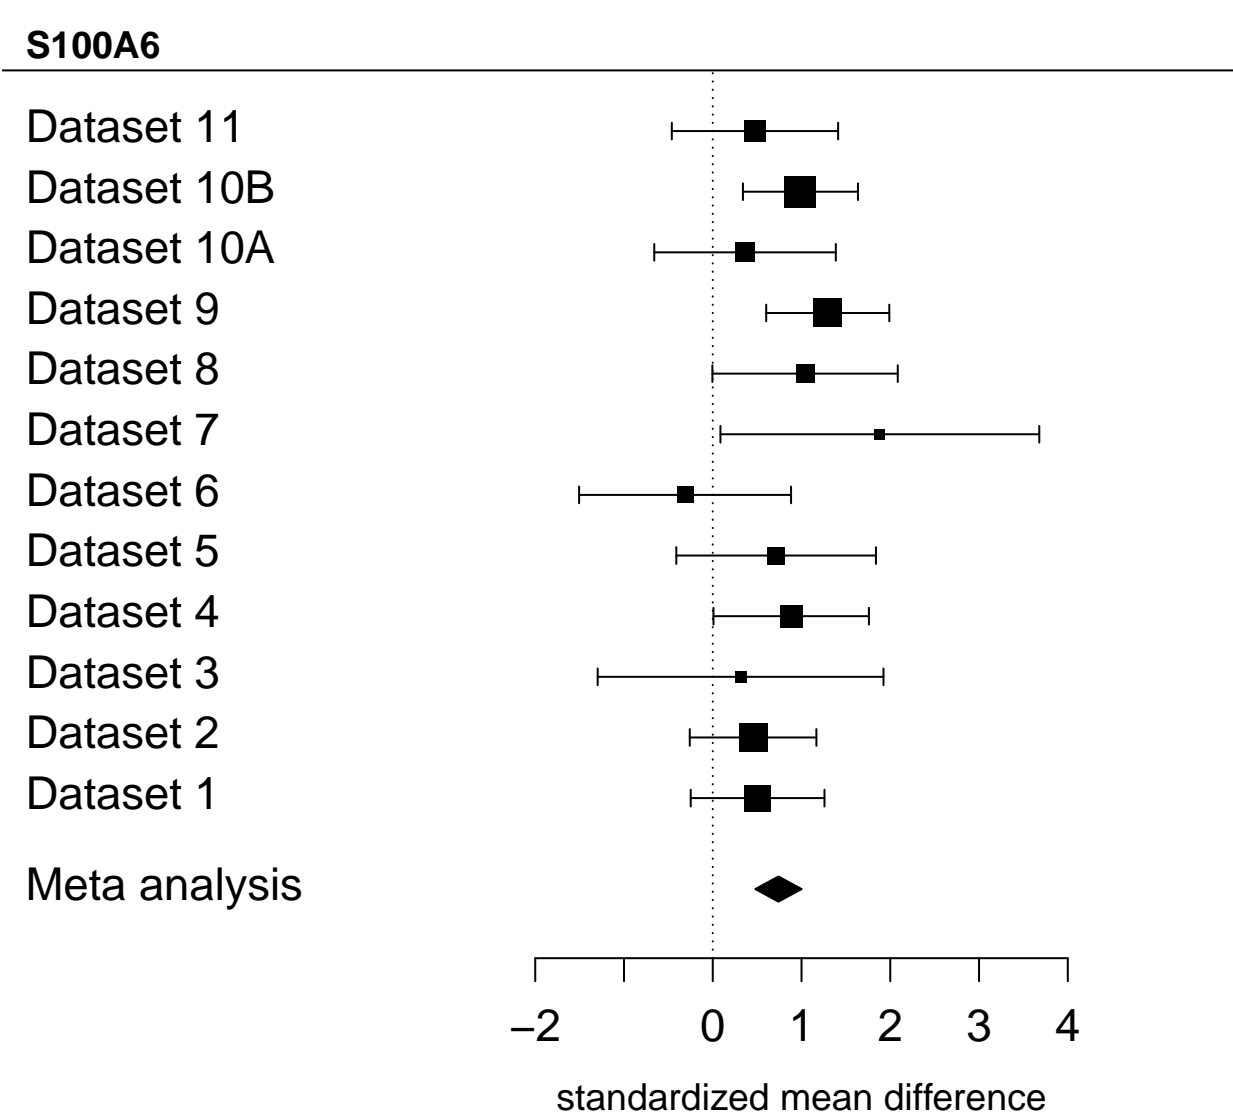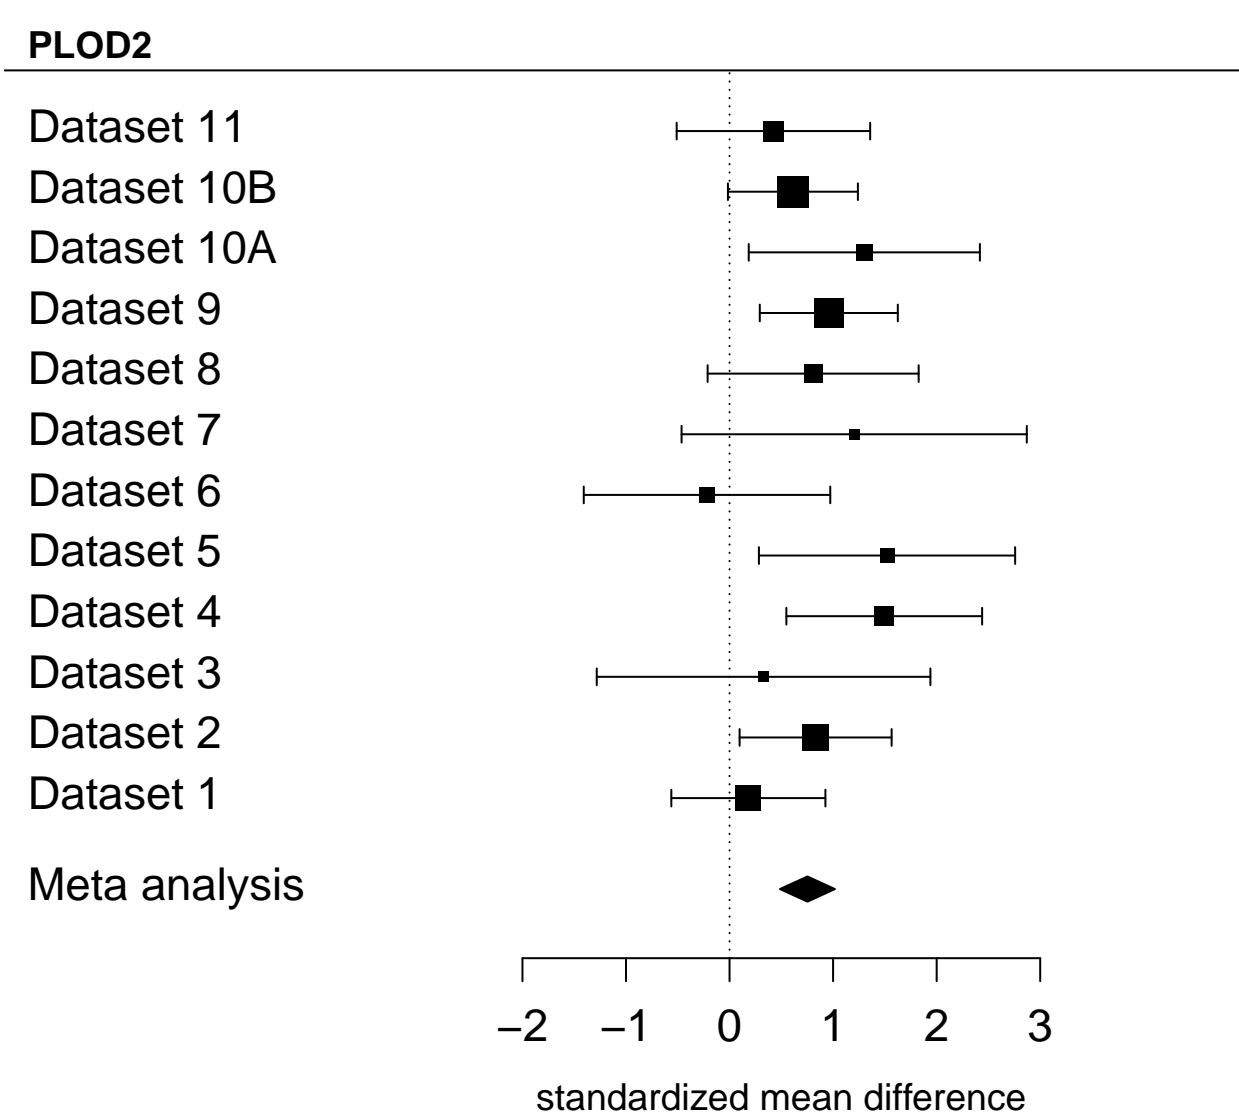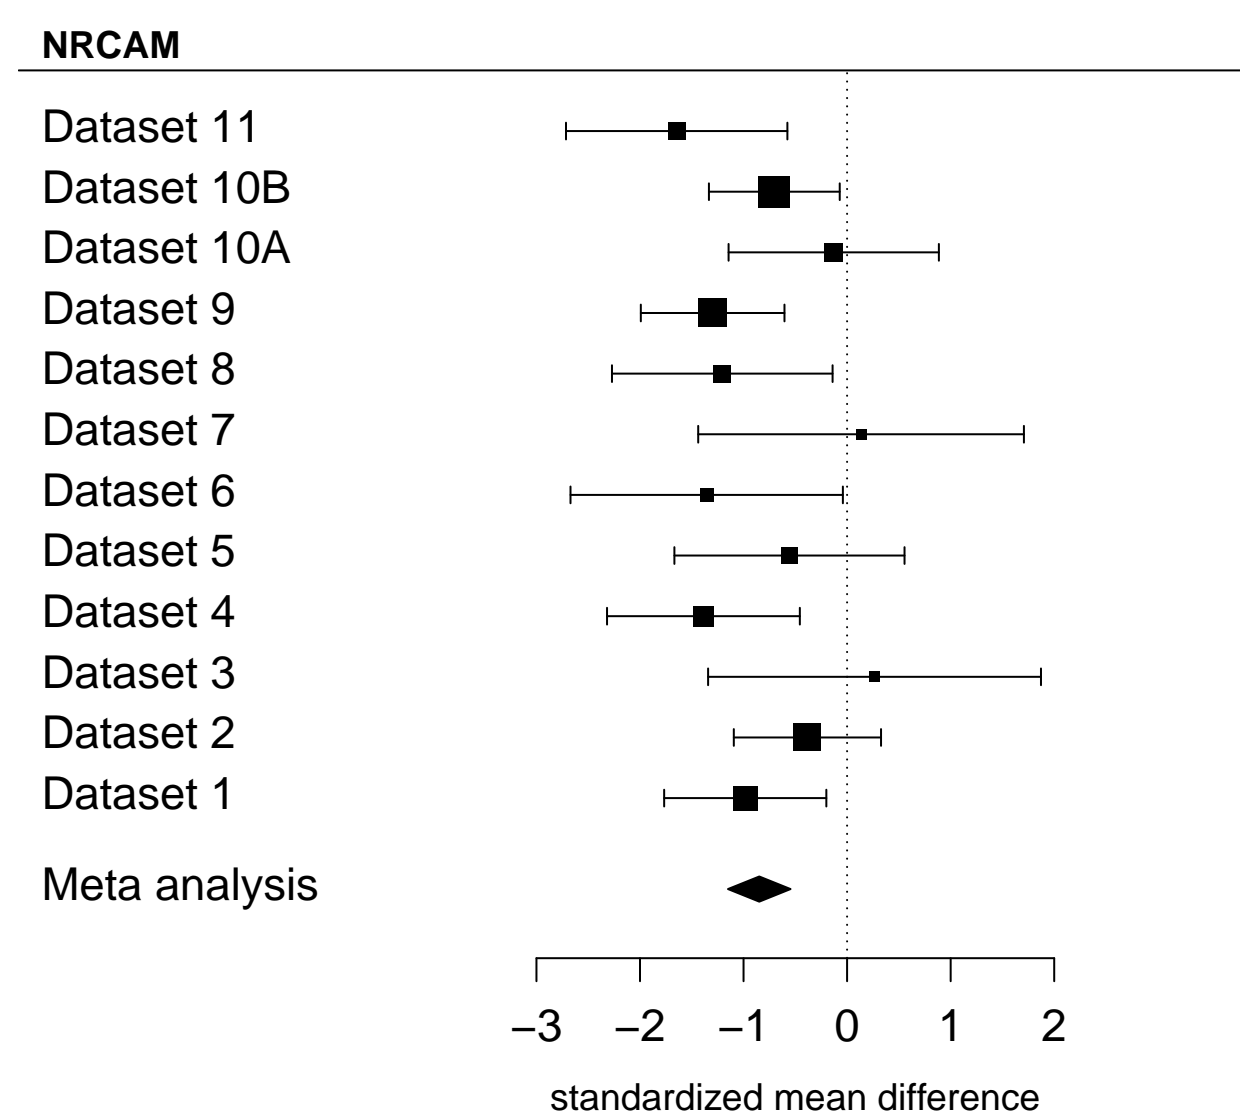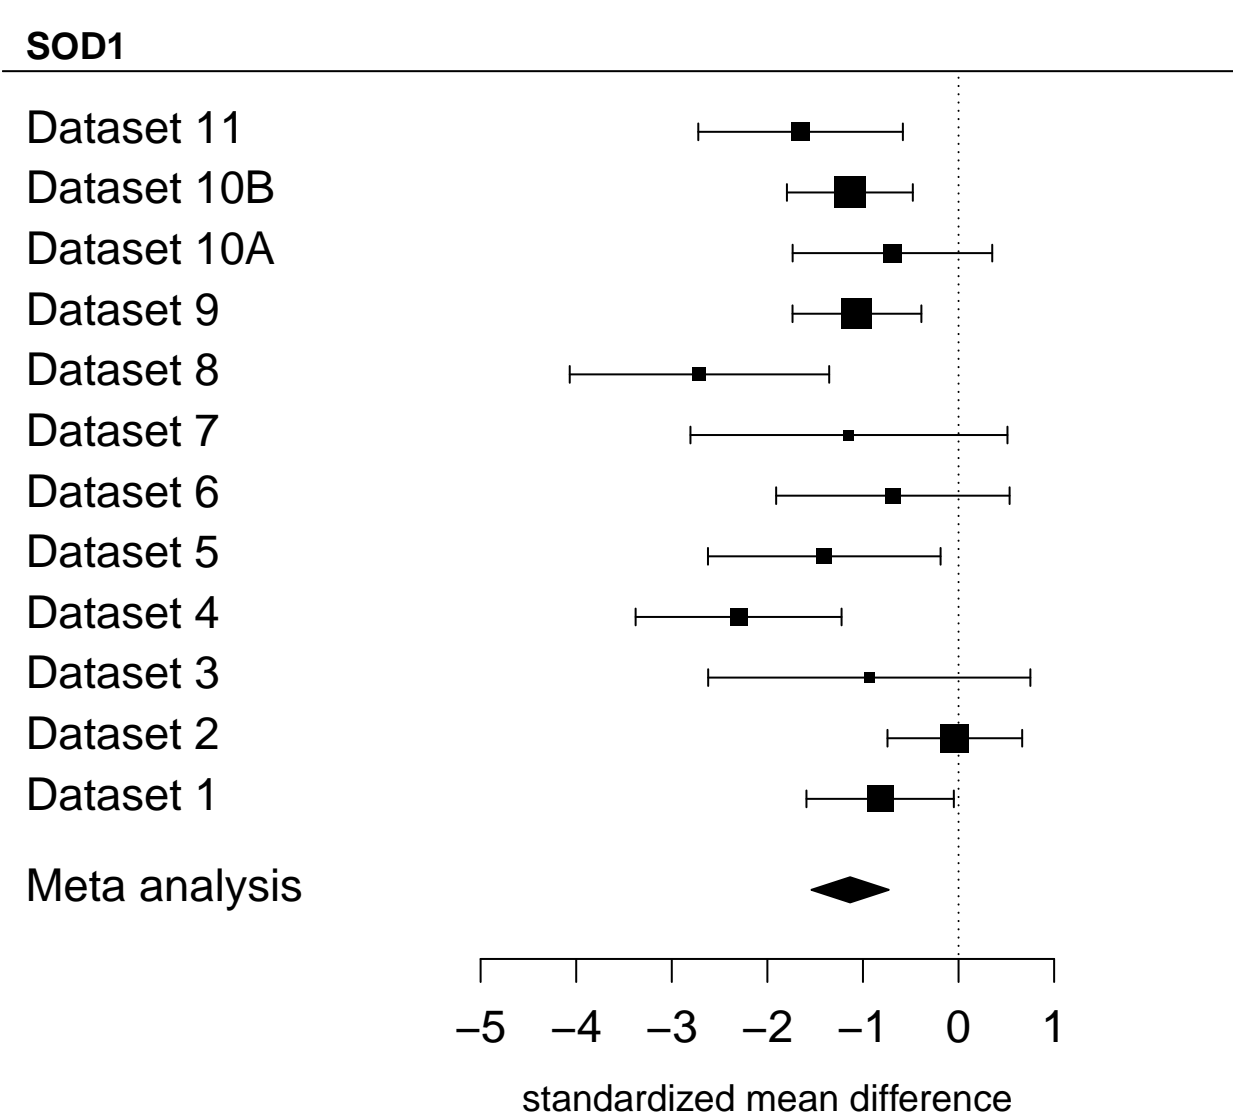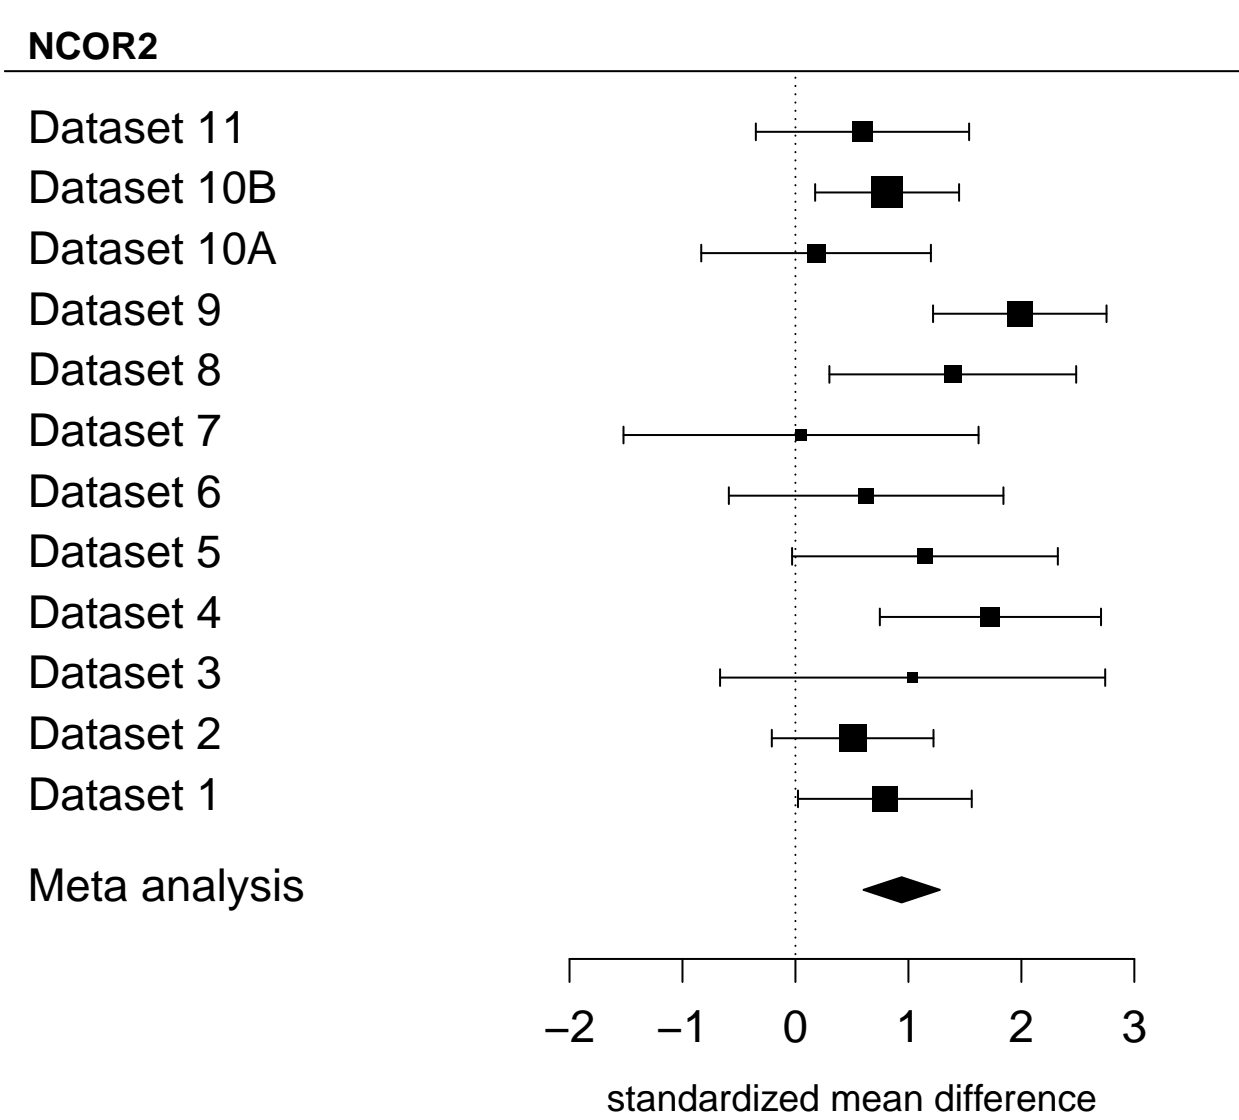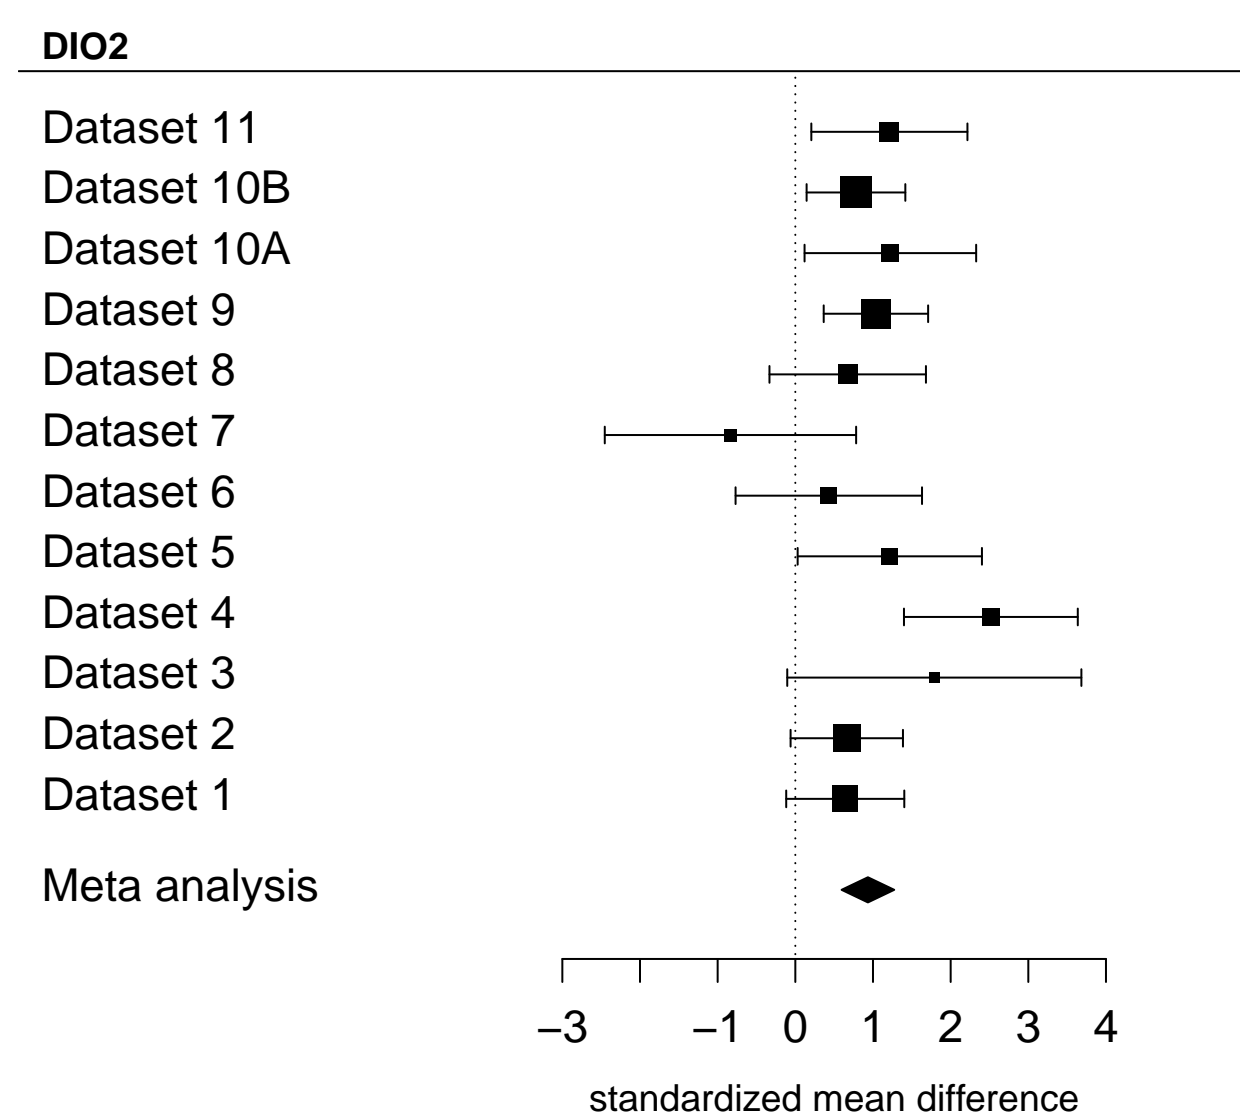

**HEXB**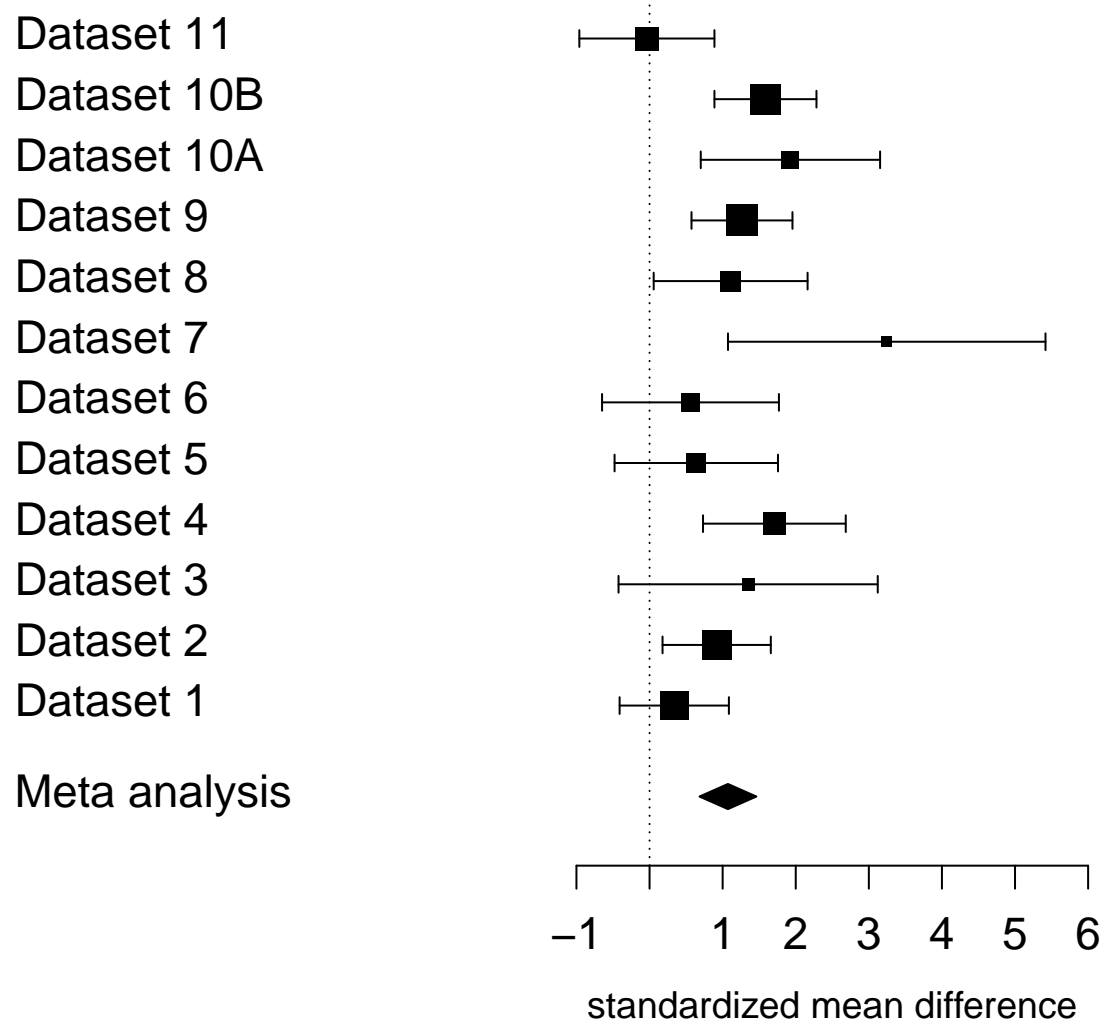**CASD1**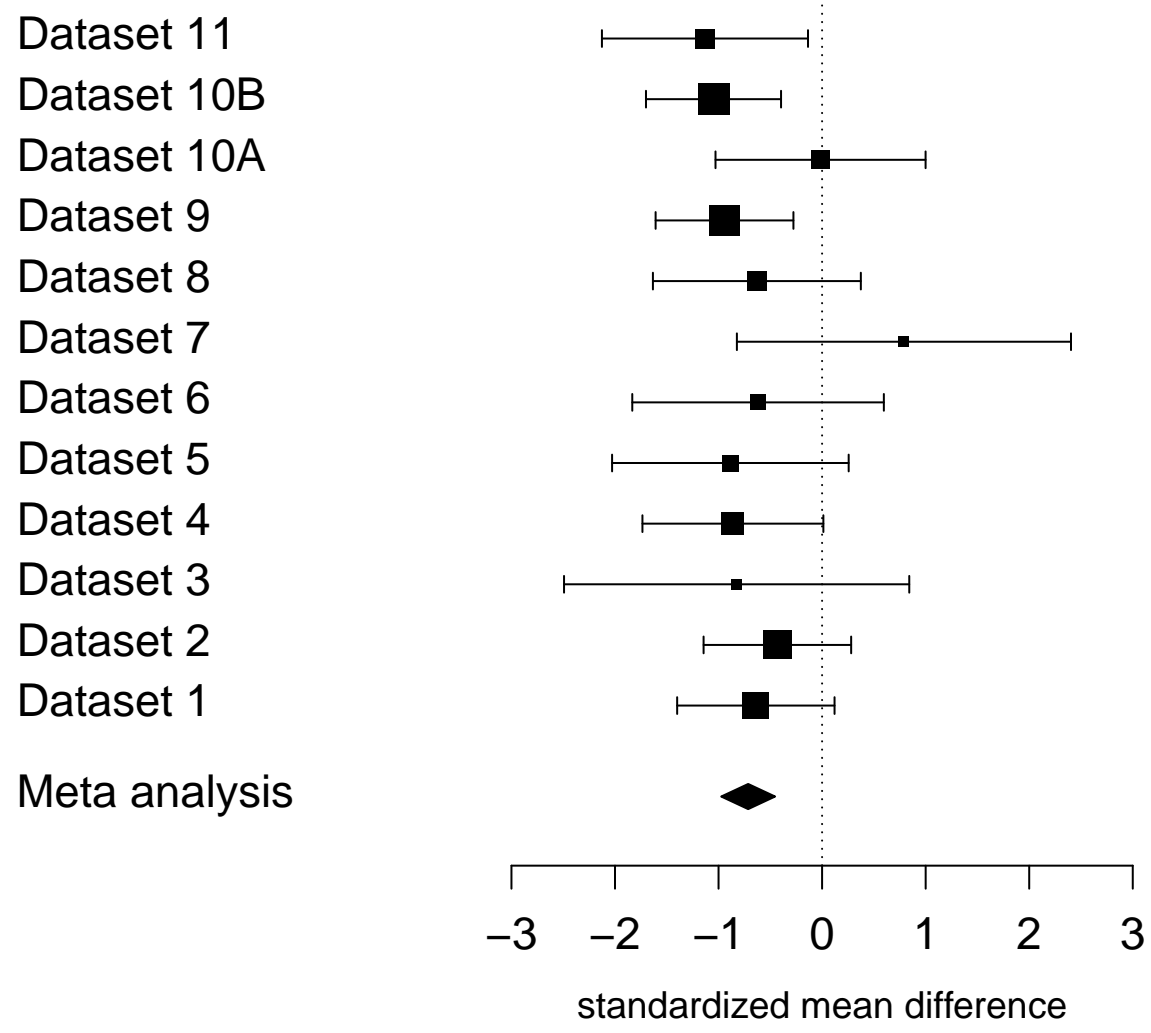**C10orf10**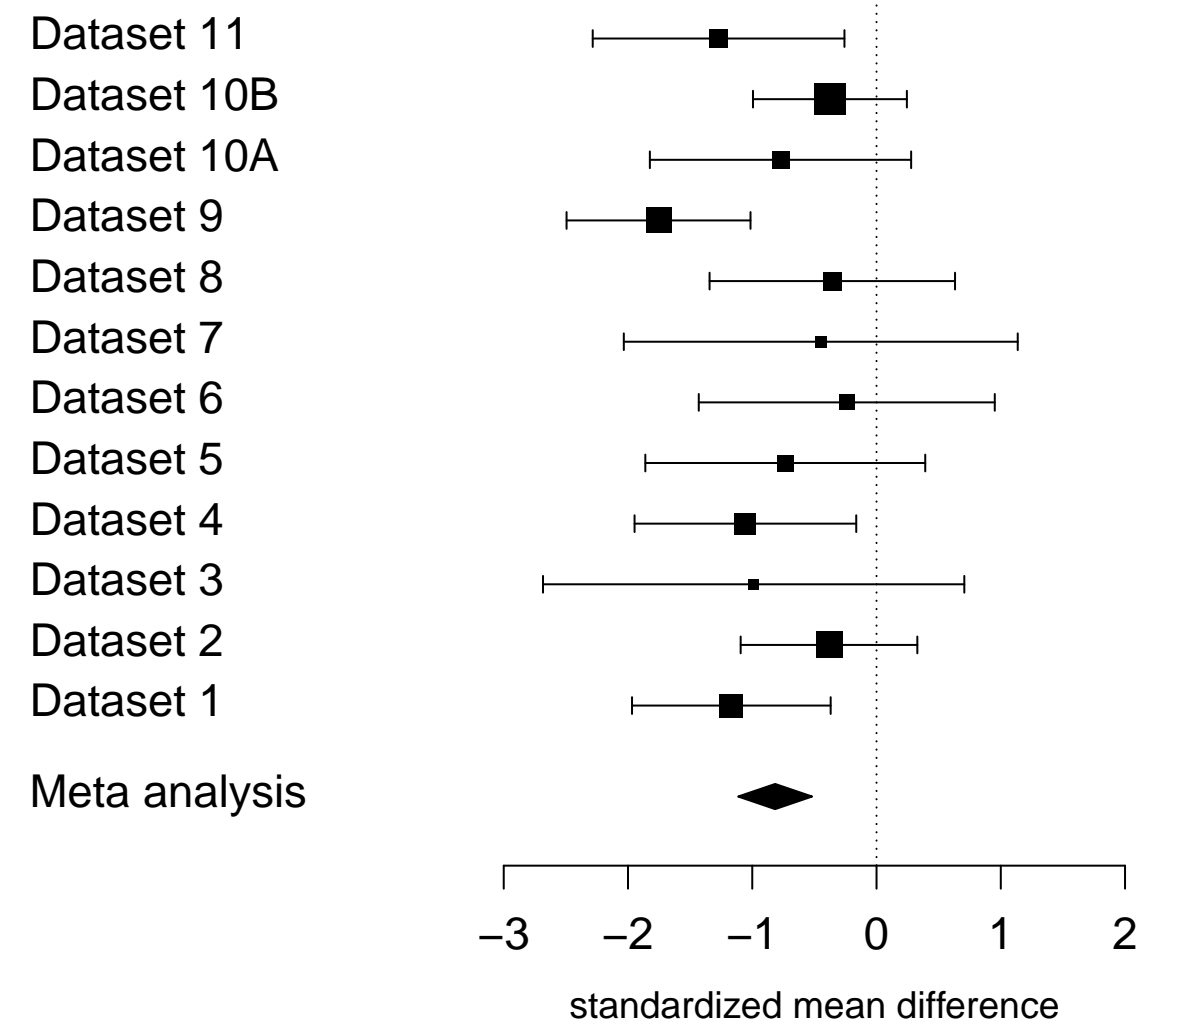**LCP1**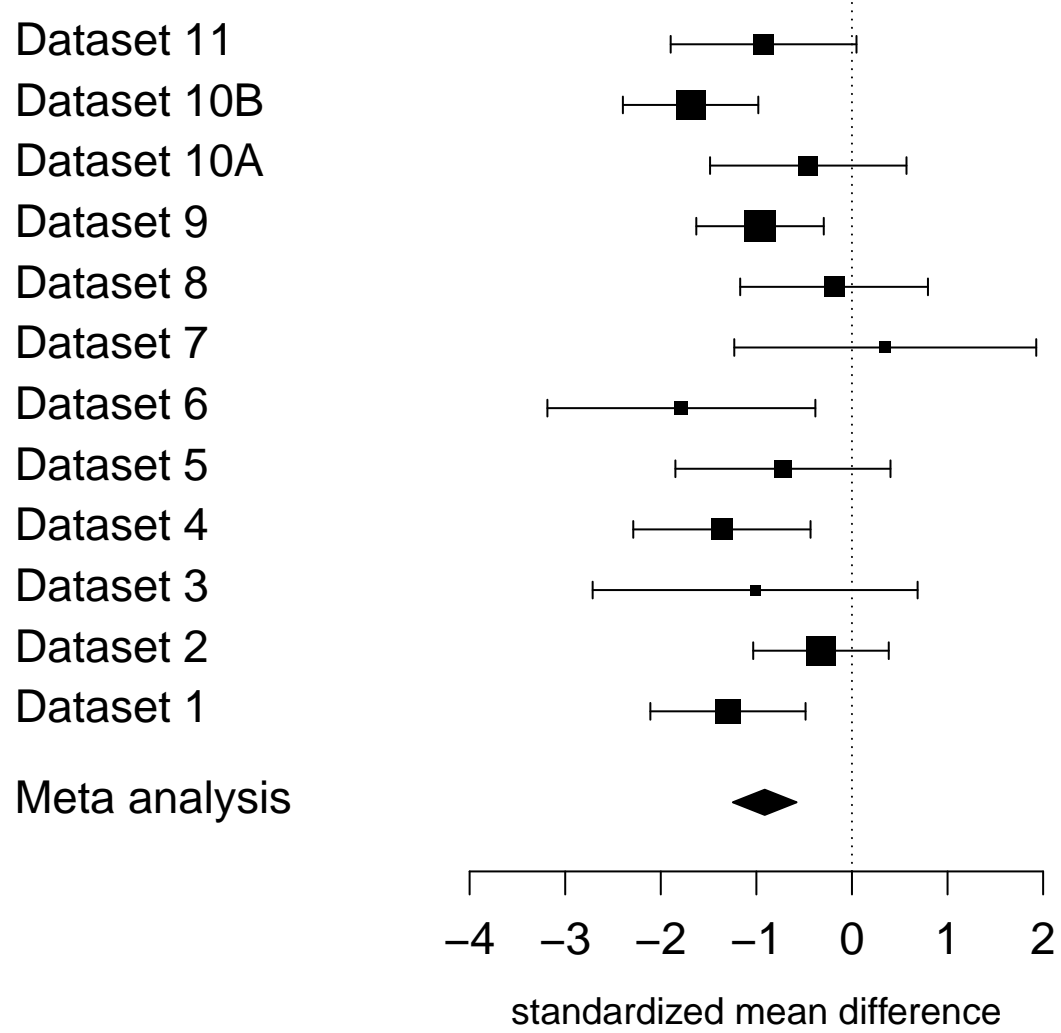**ANK3**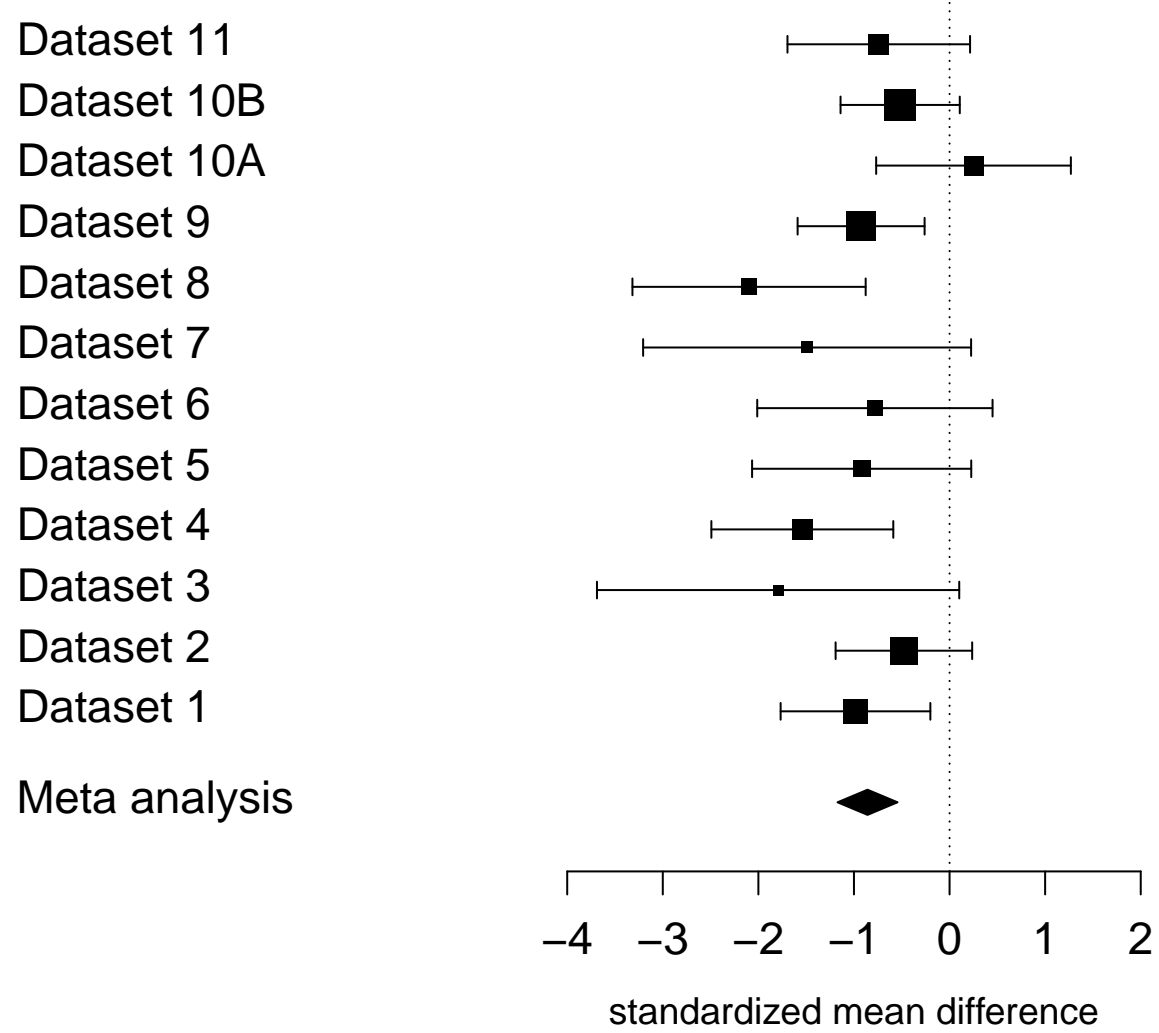**ENPP1**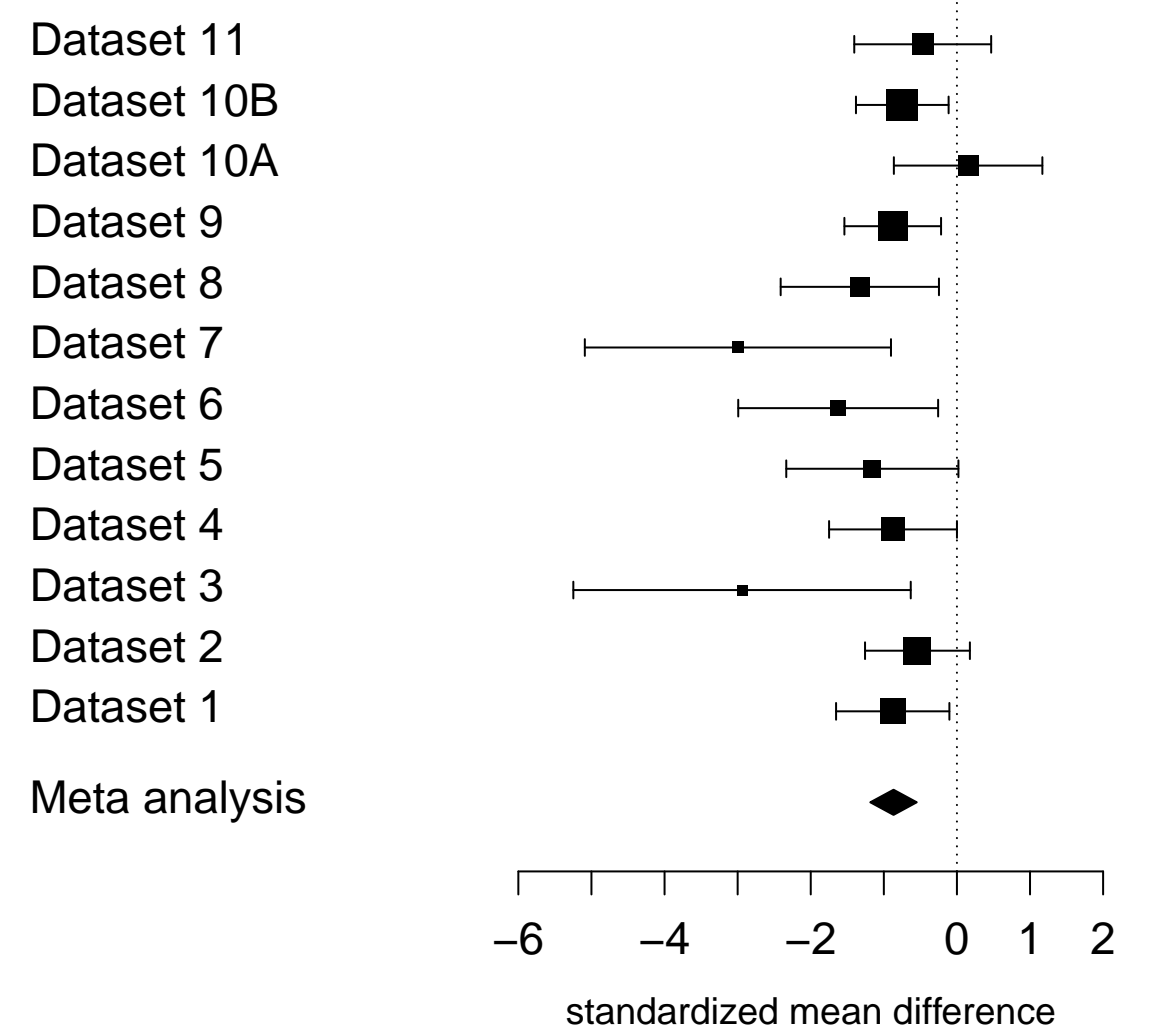**LIMCH1**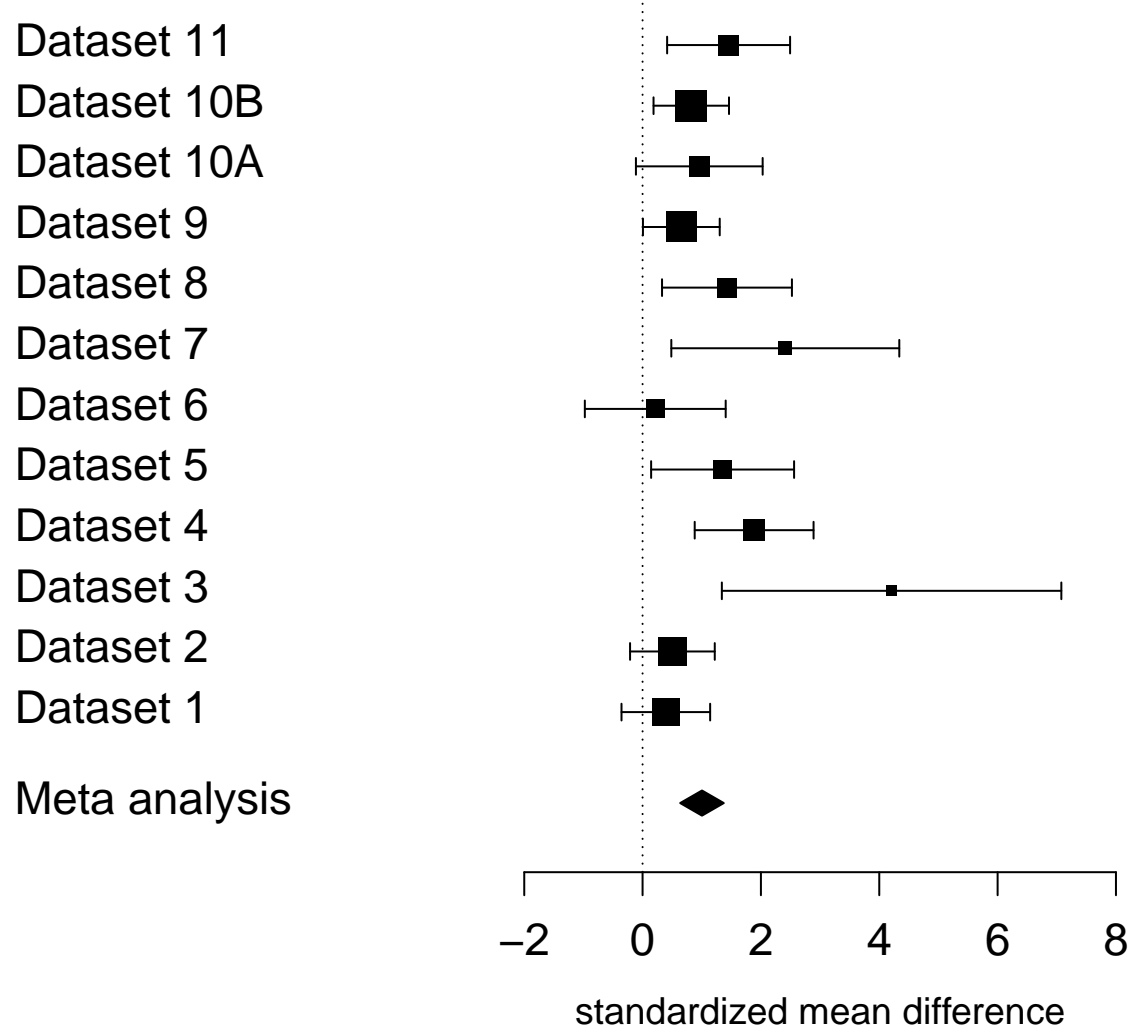**ARHGAP17**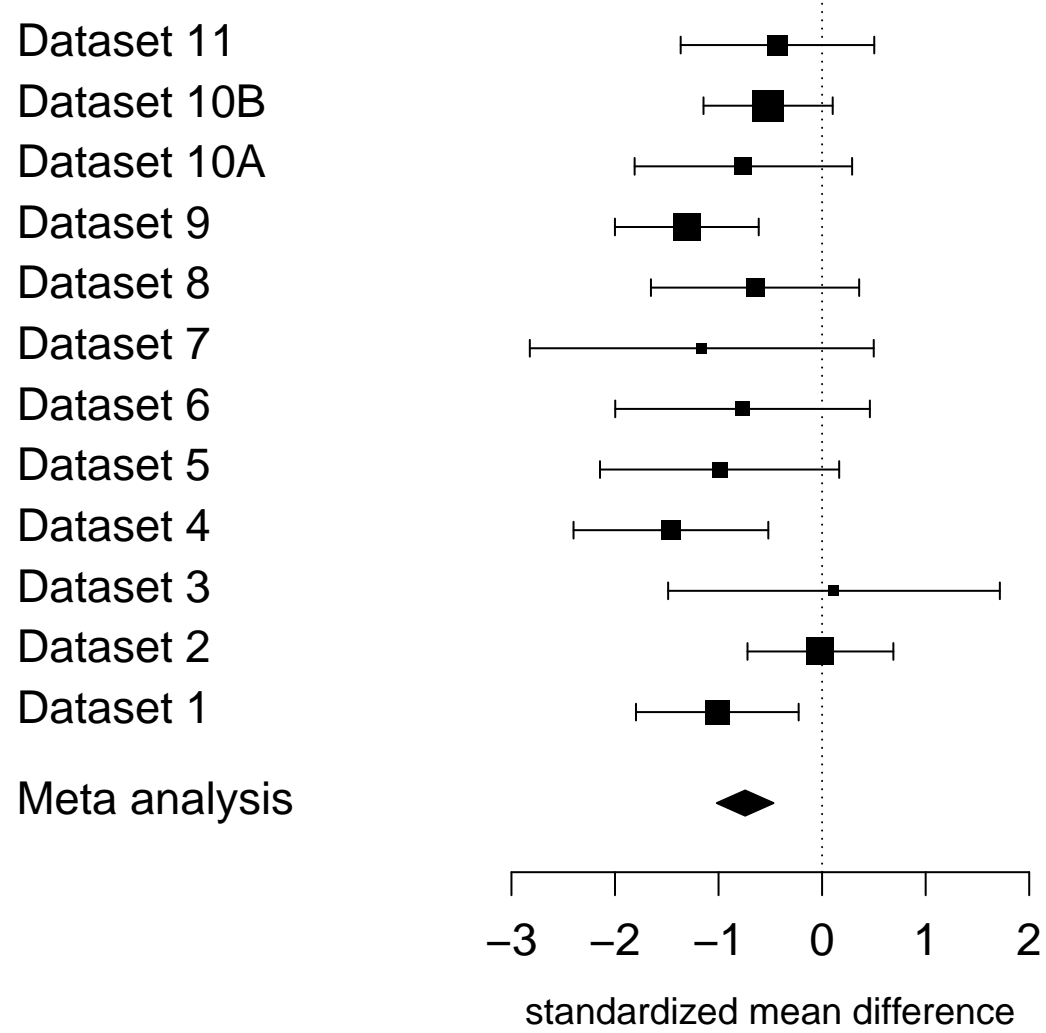**GFOD2**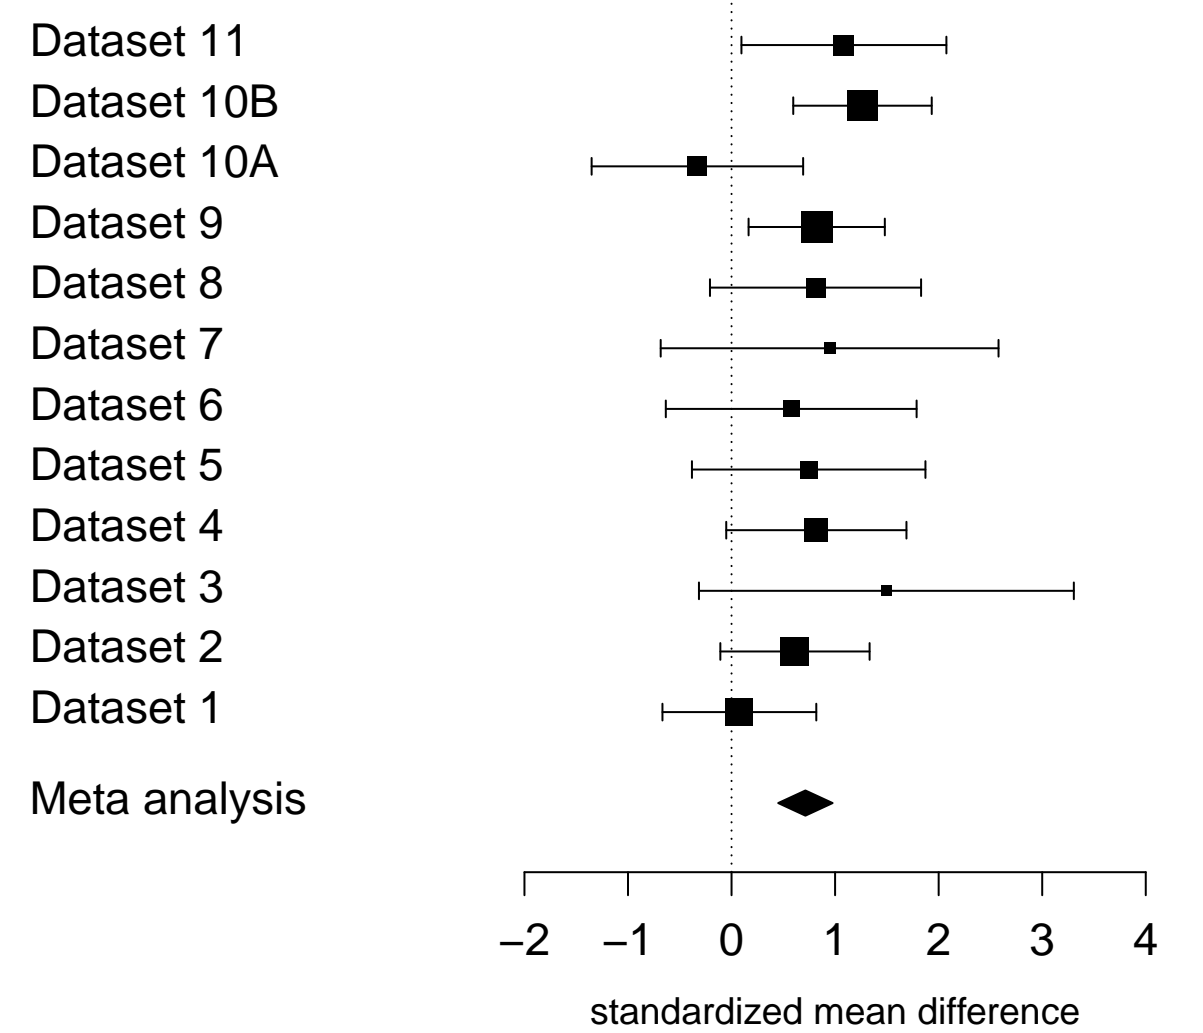**ARPC5**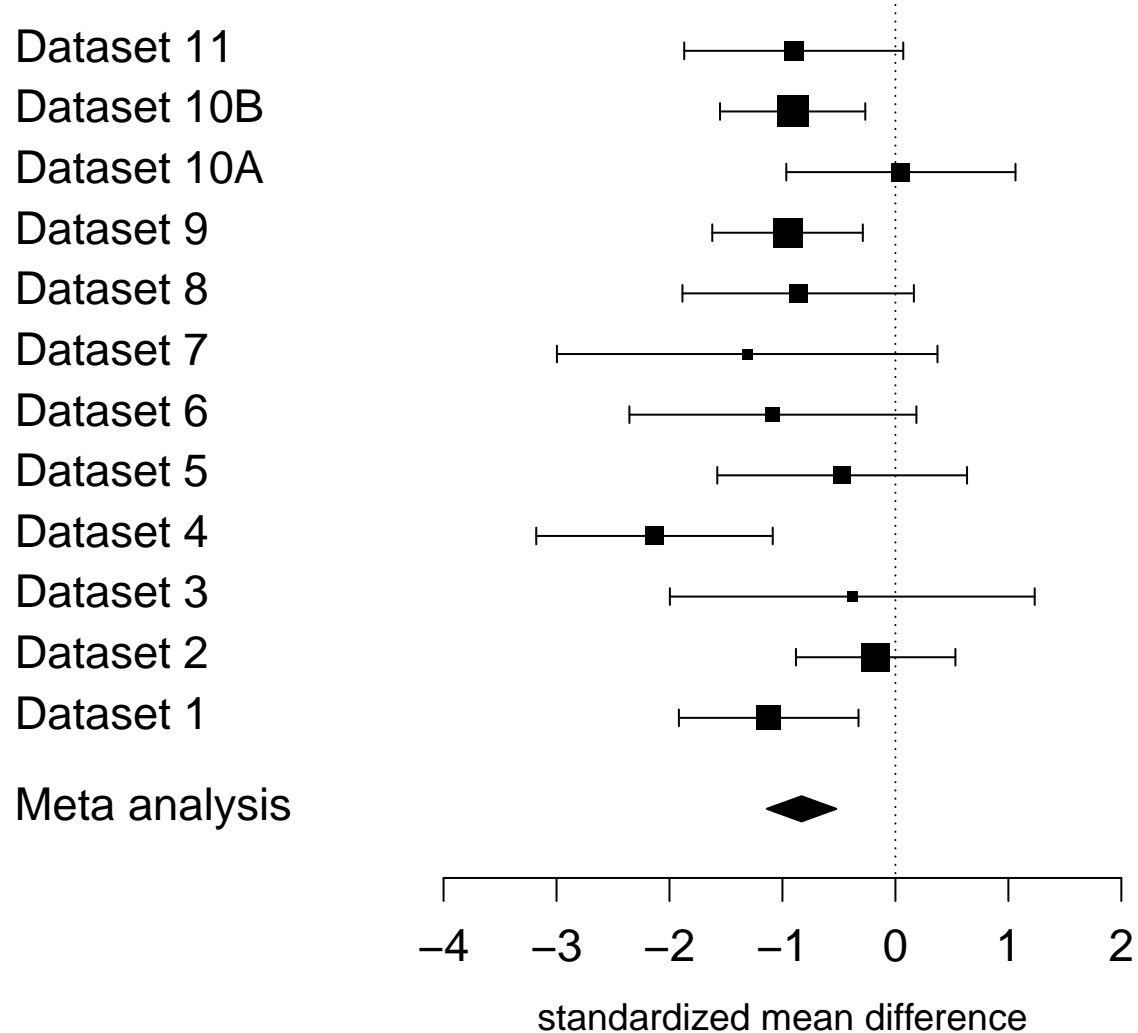**ENPP2**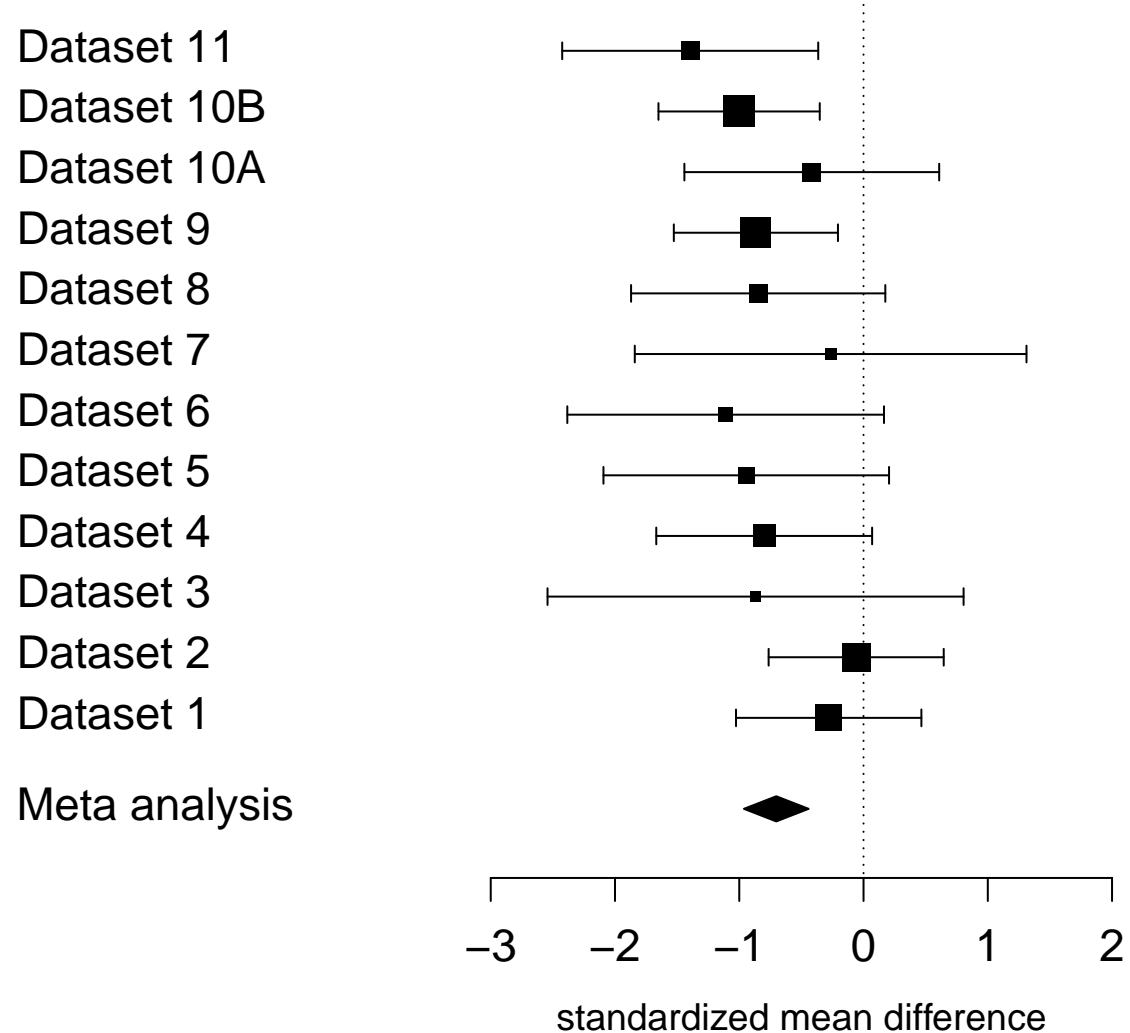**SEMA4C**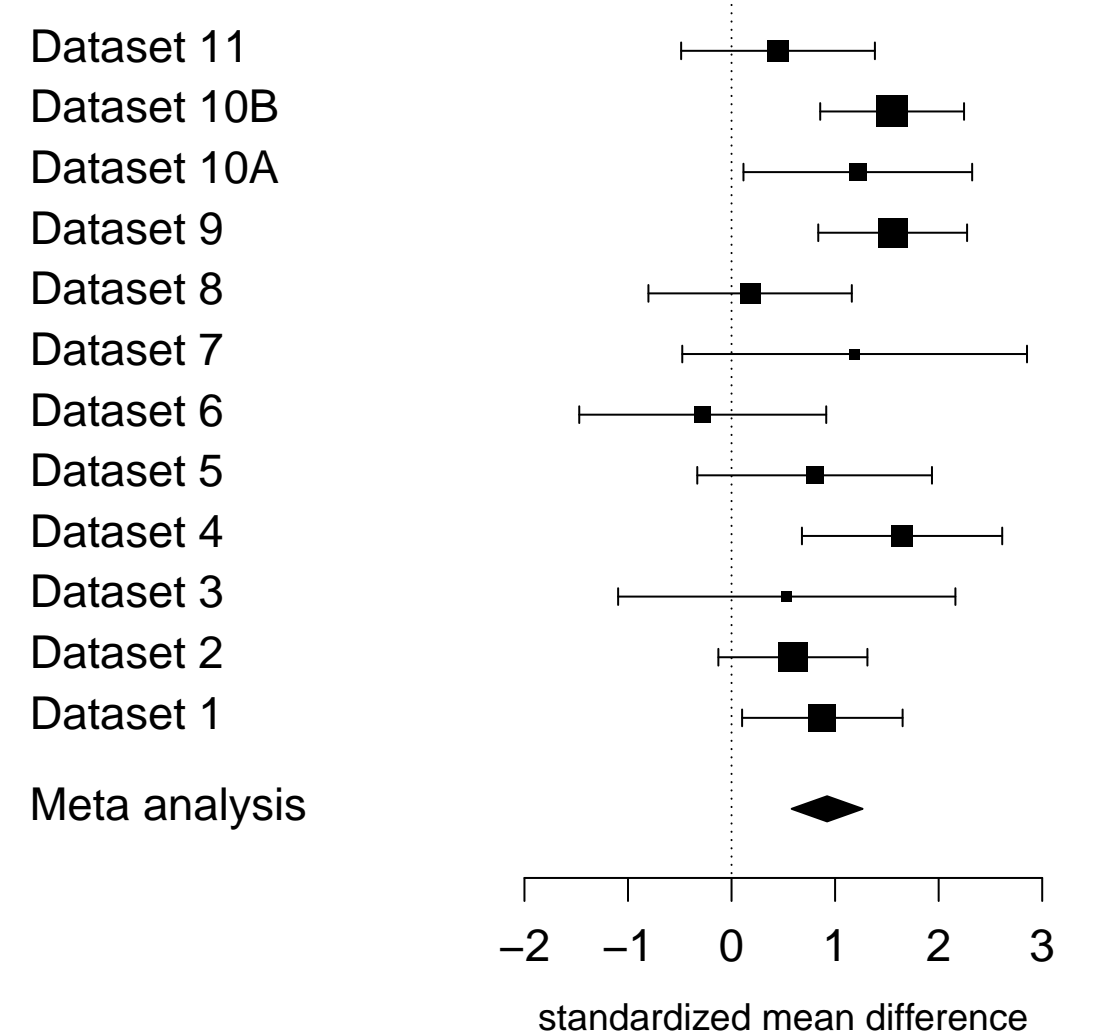





**CD53**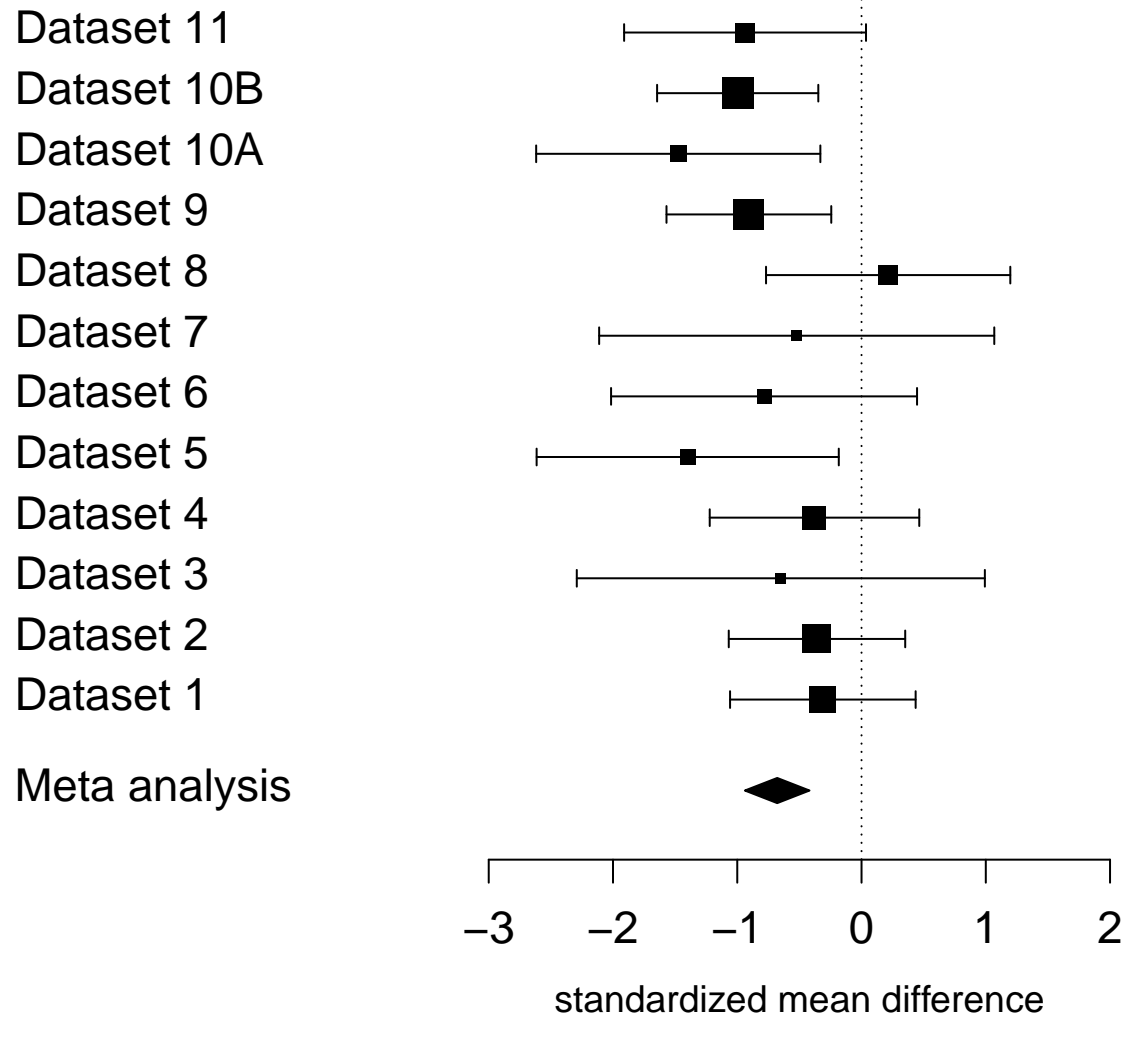**CYP26A1**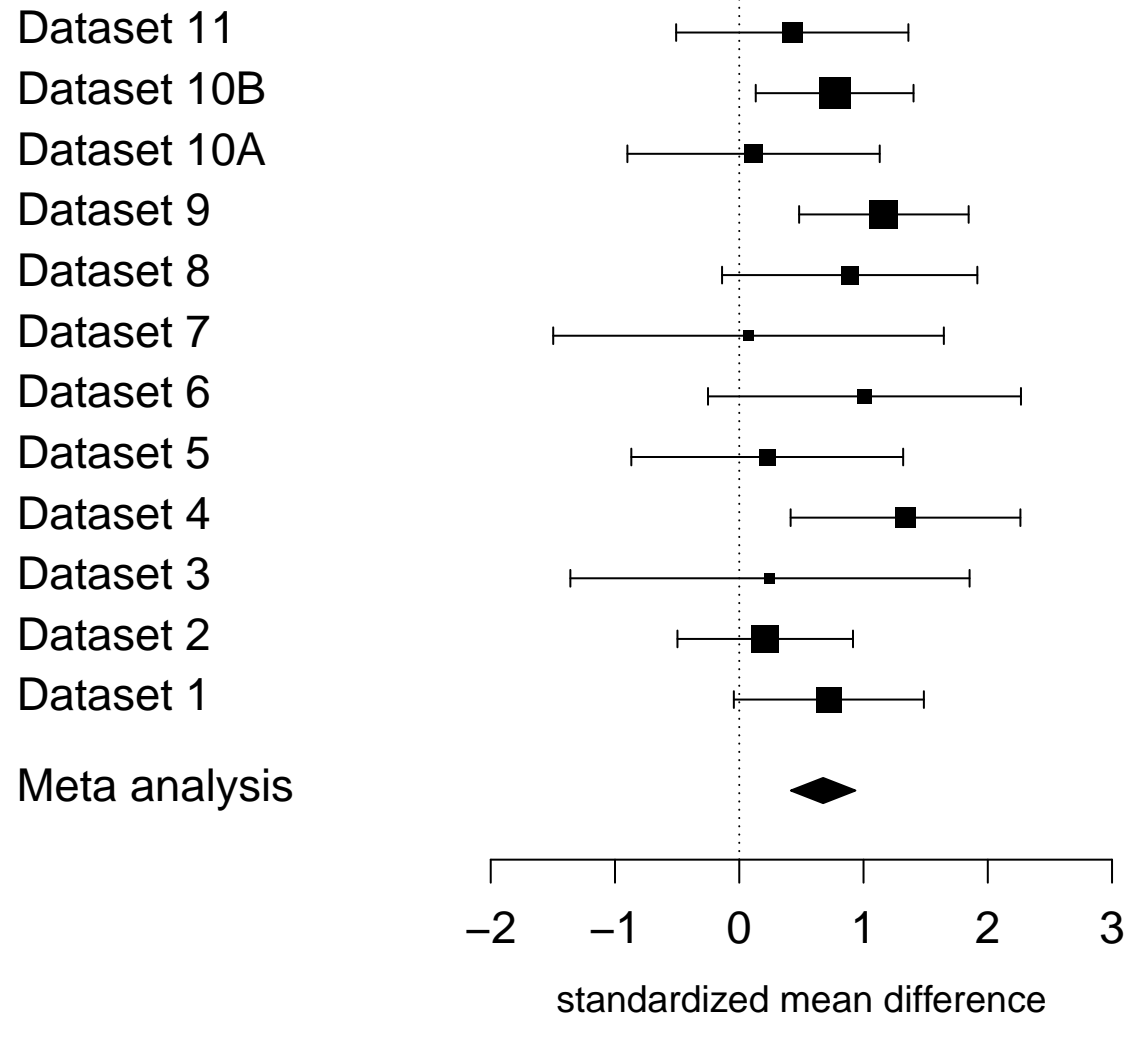**MAF**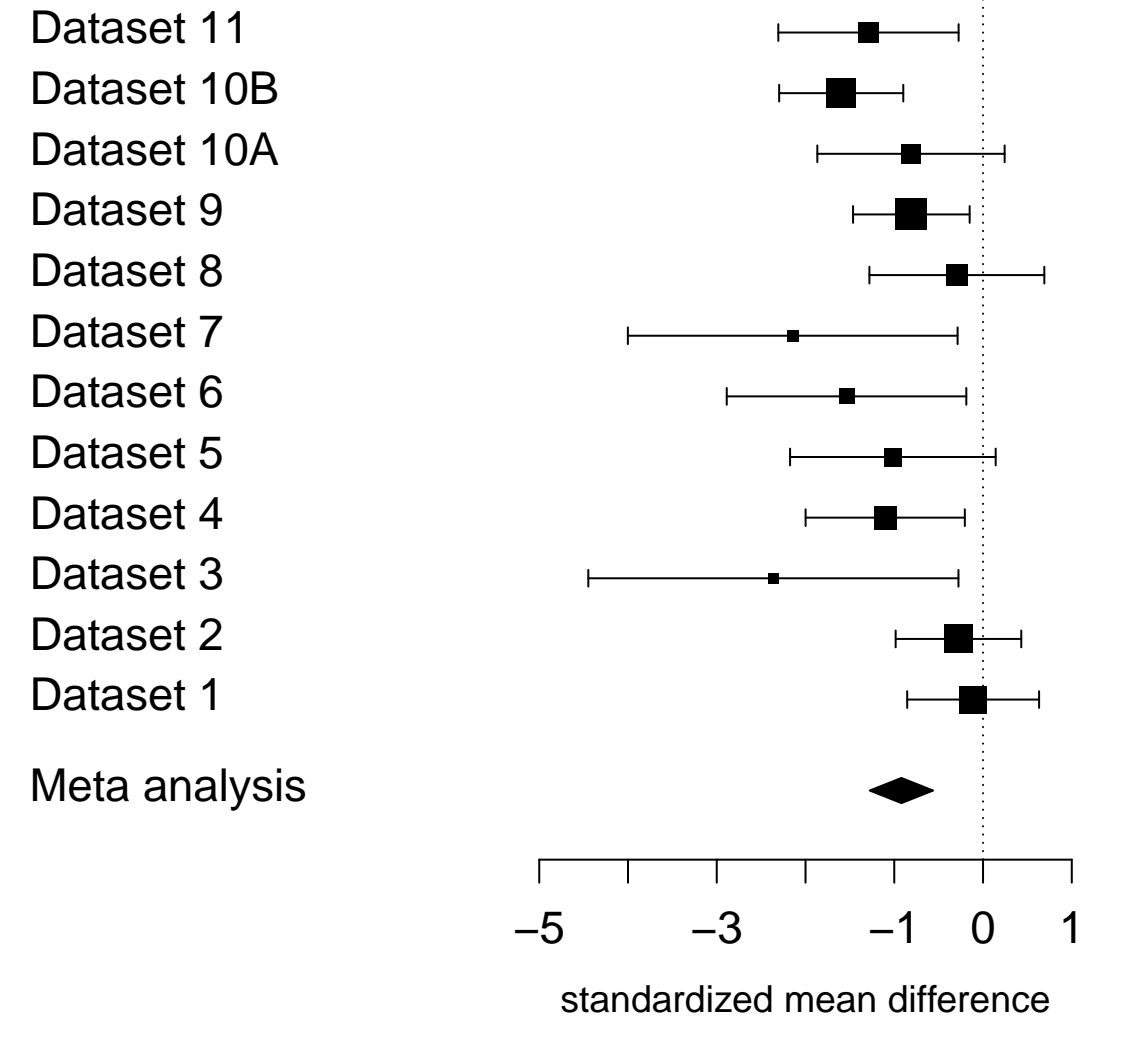**CDO1**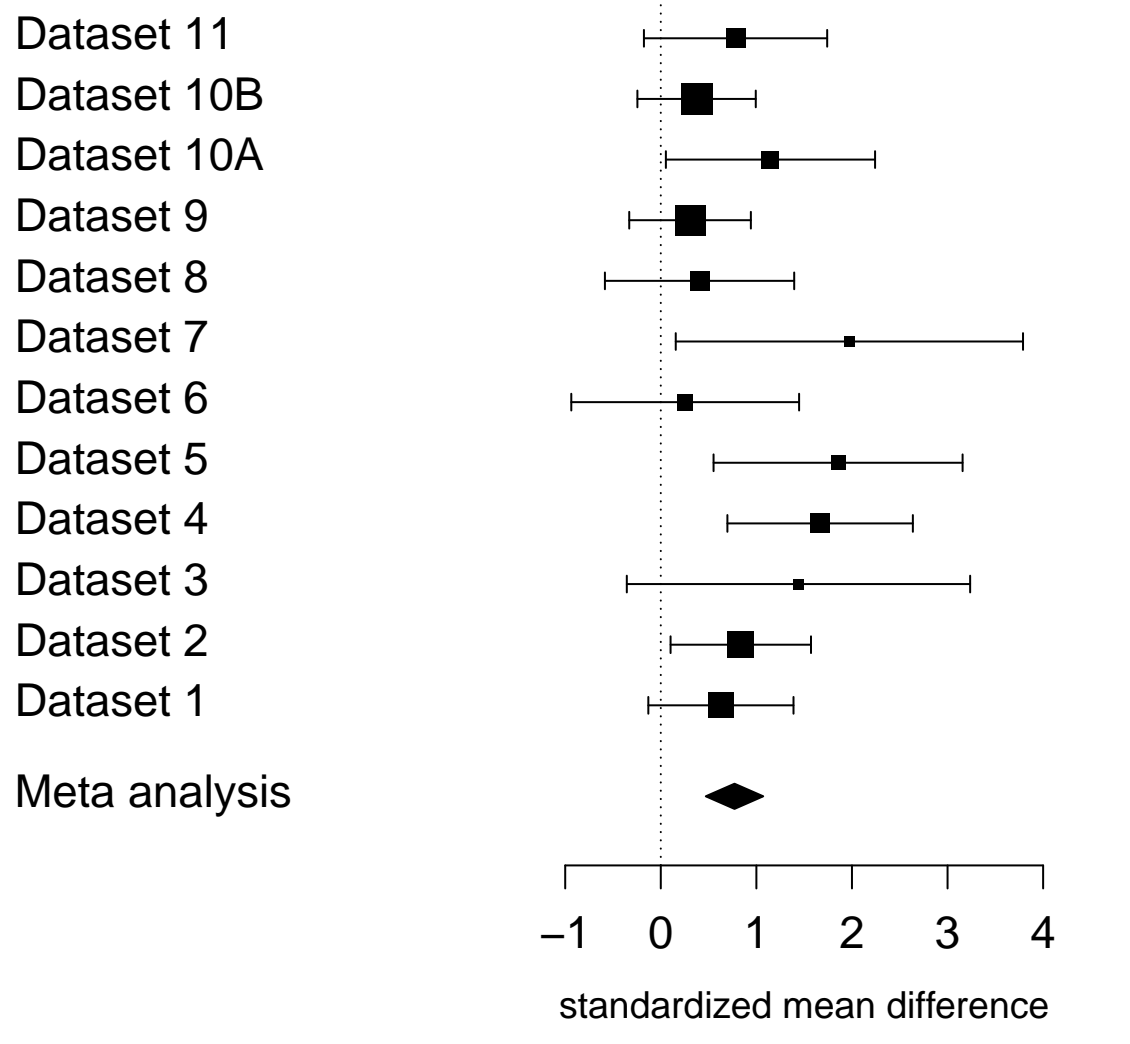**SLCO2A1**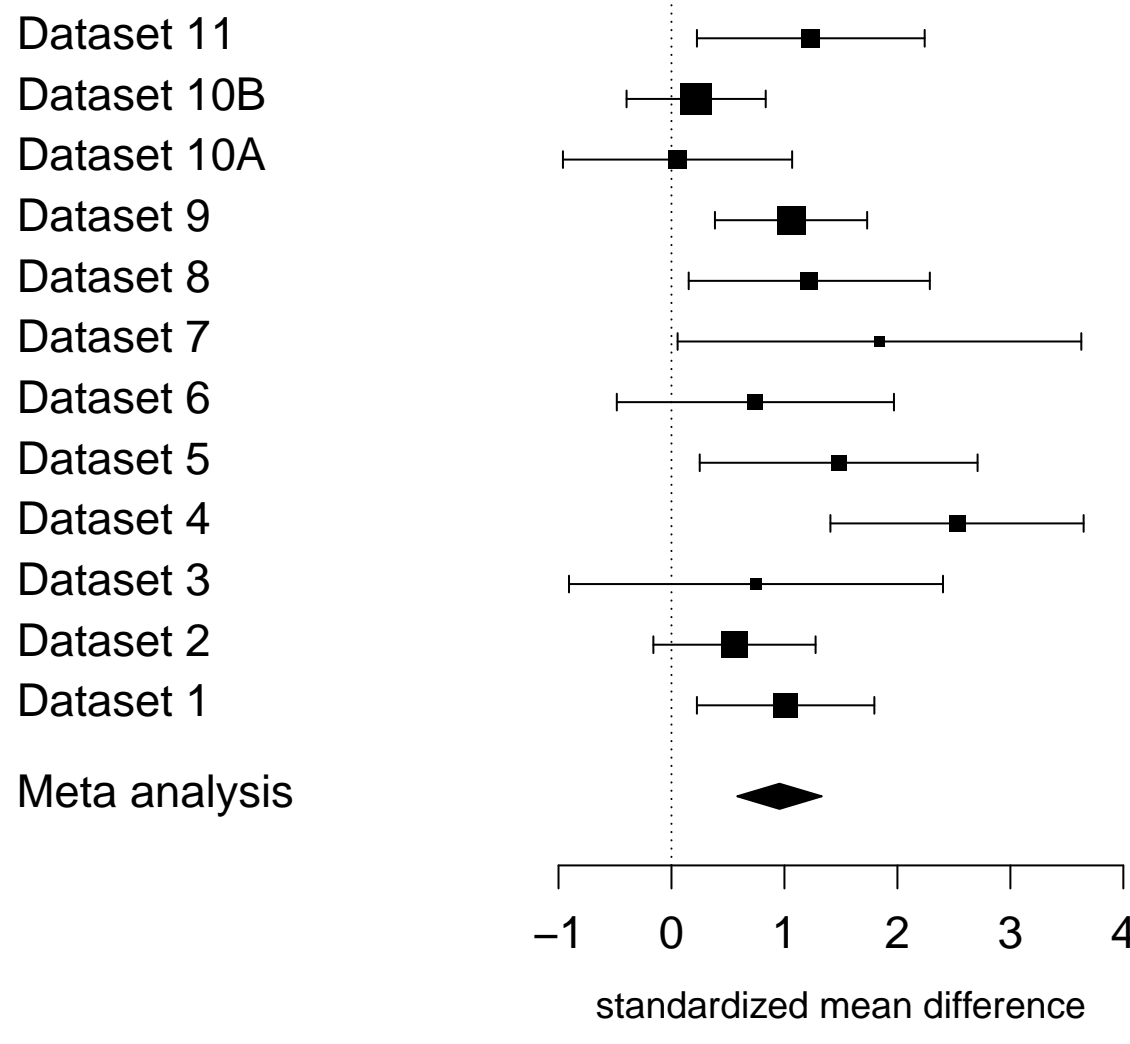**HILPDA**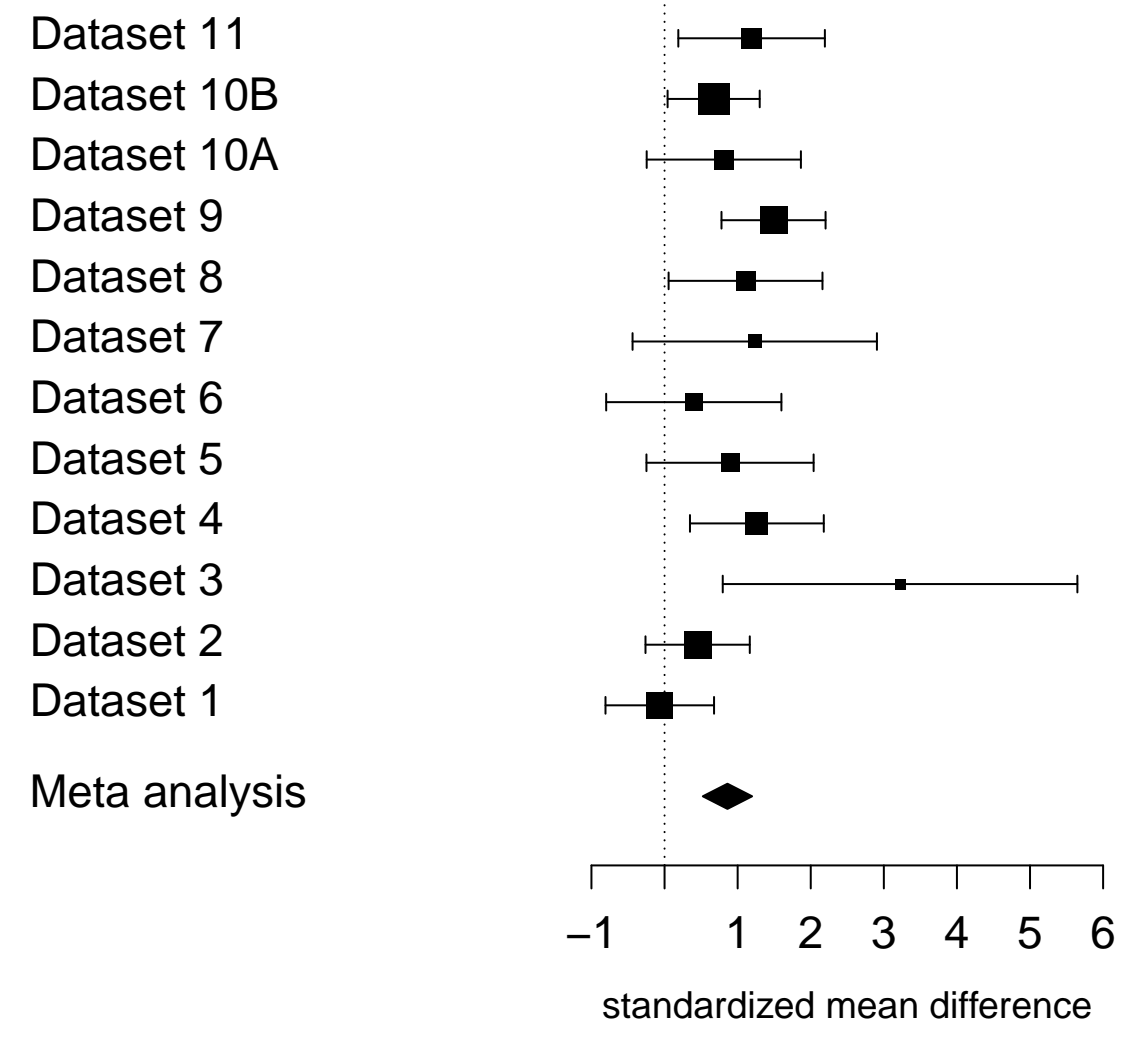**INSL4**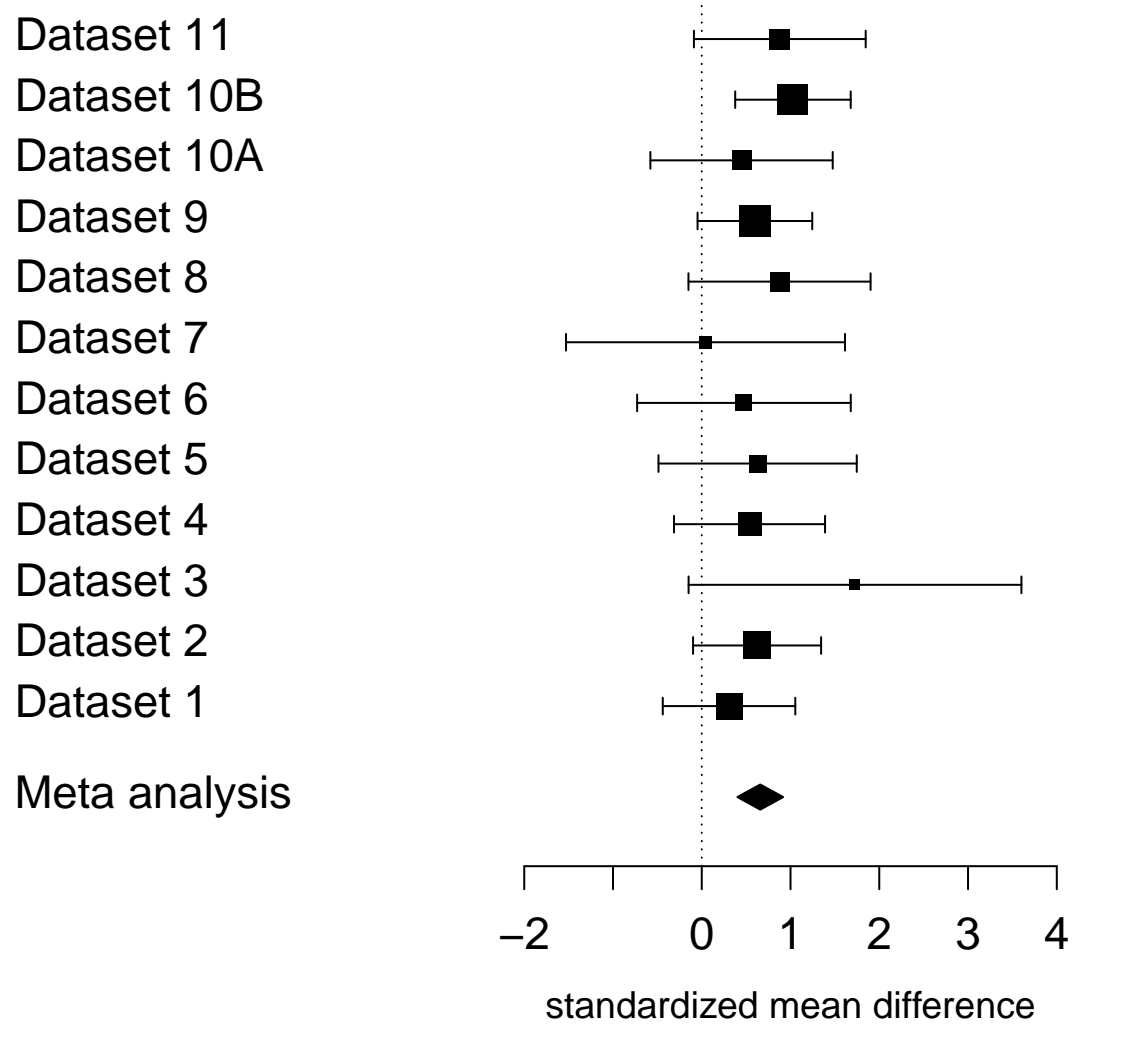**KDM3A**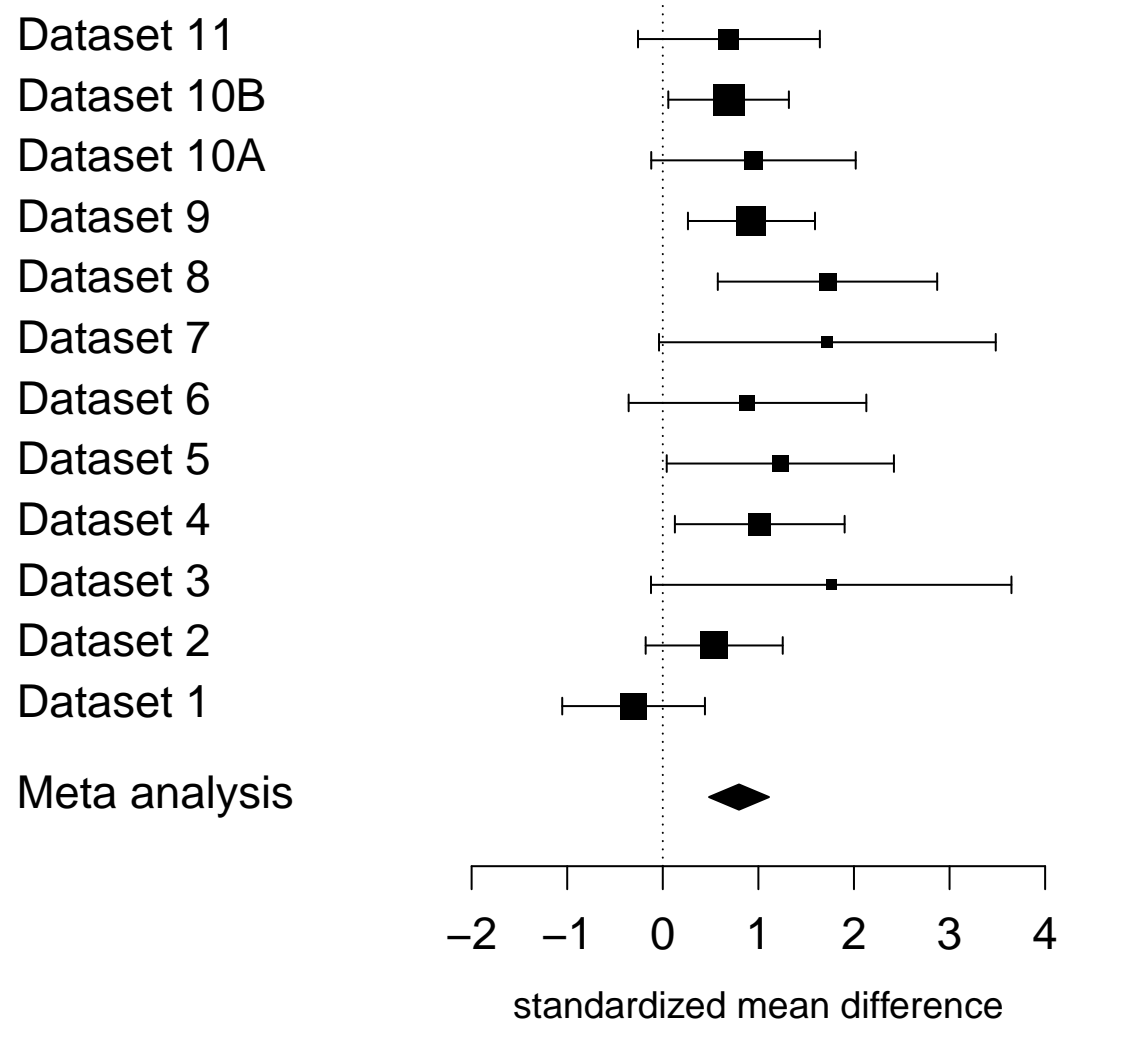**ARHGEF4**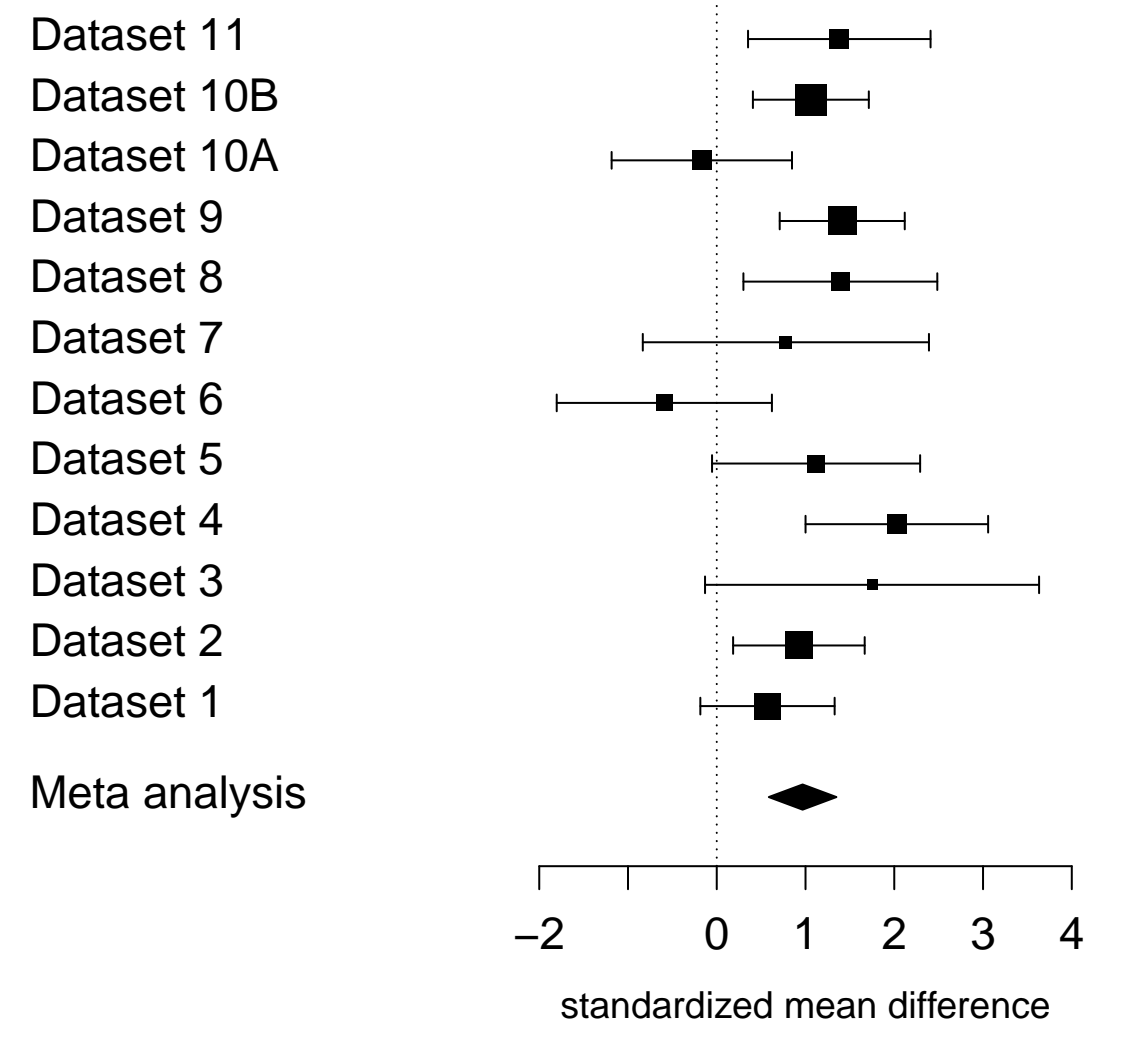**PPP1R15A**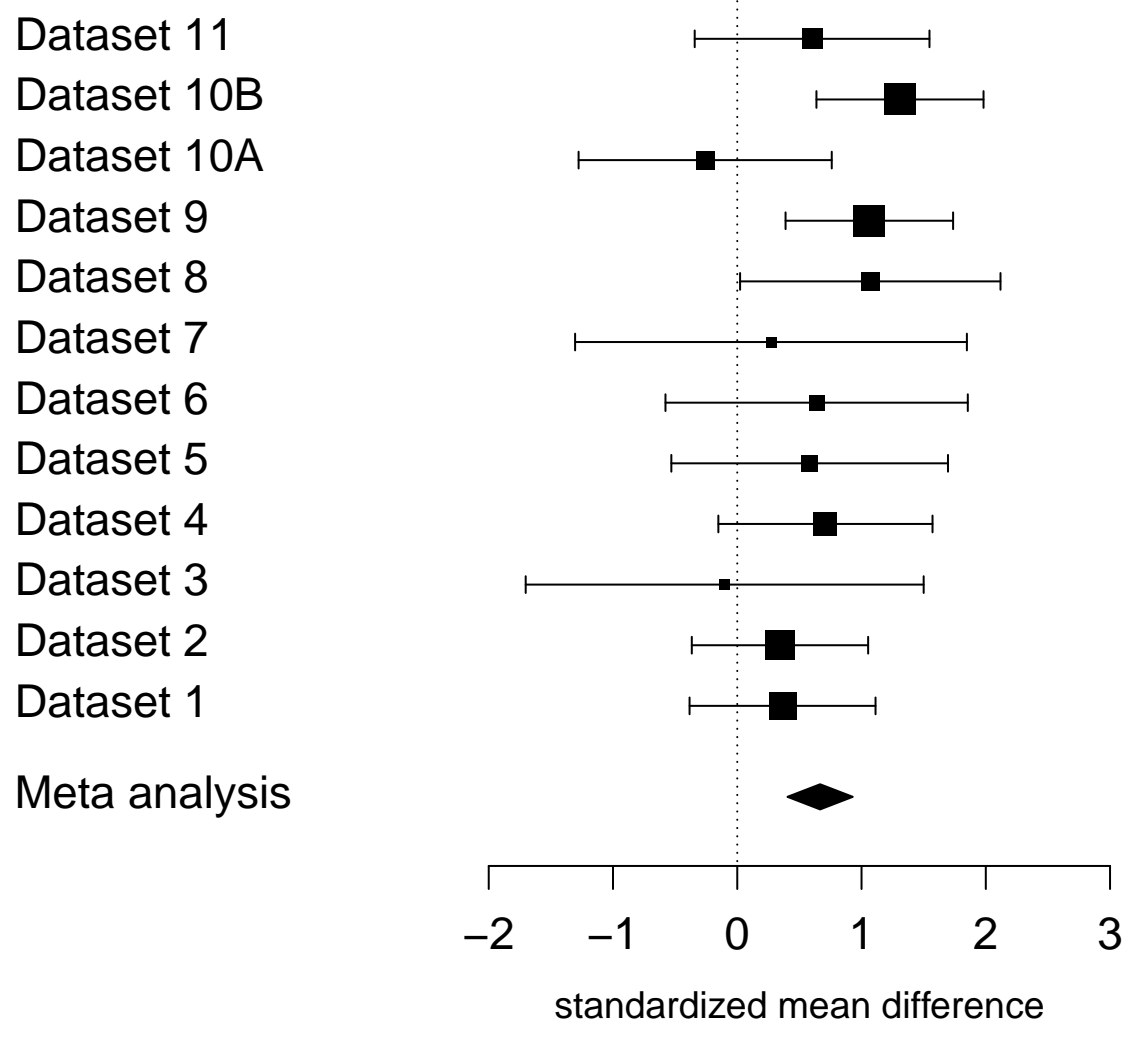**SLC2A1**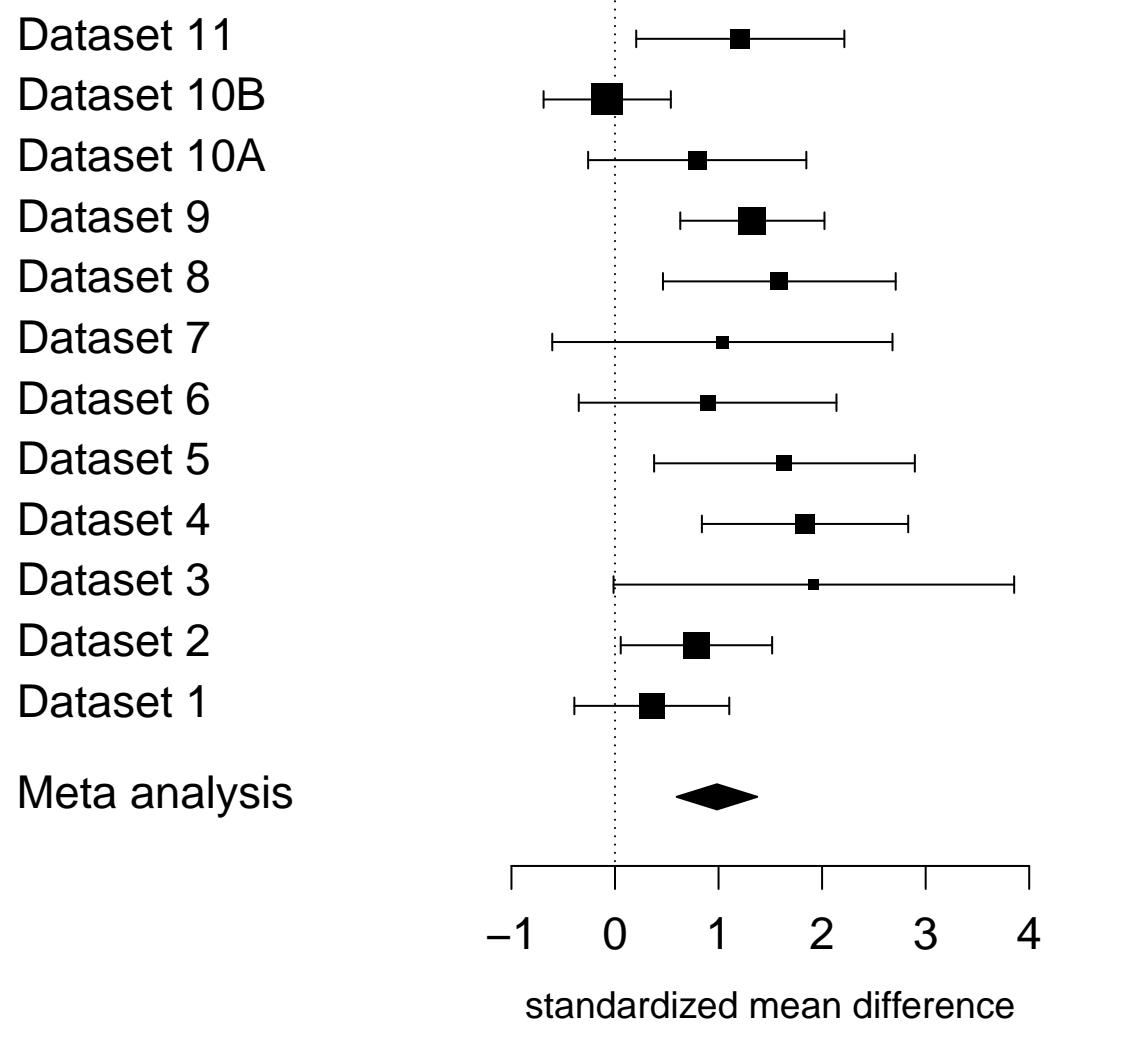**RASL11B**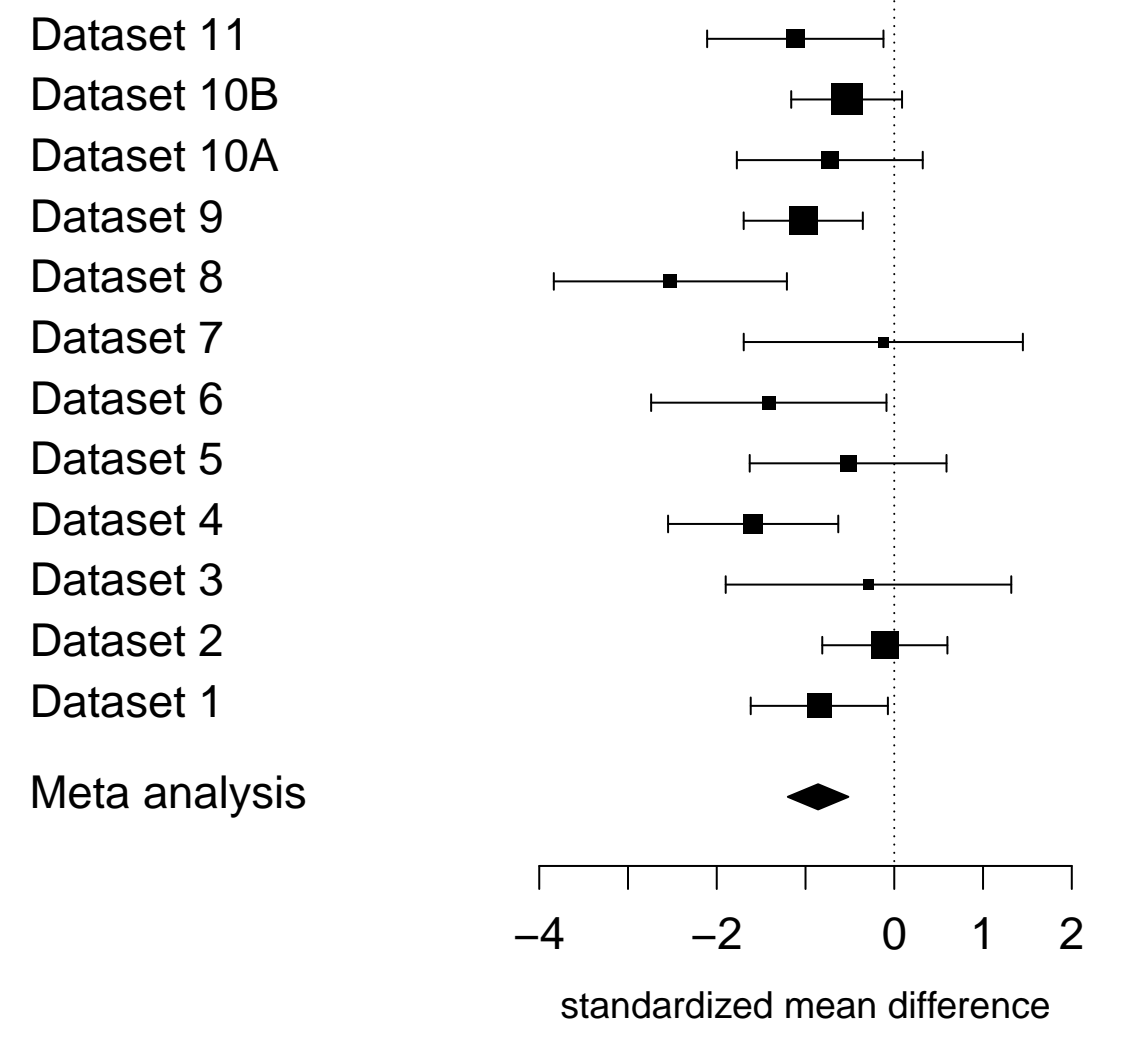

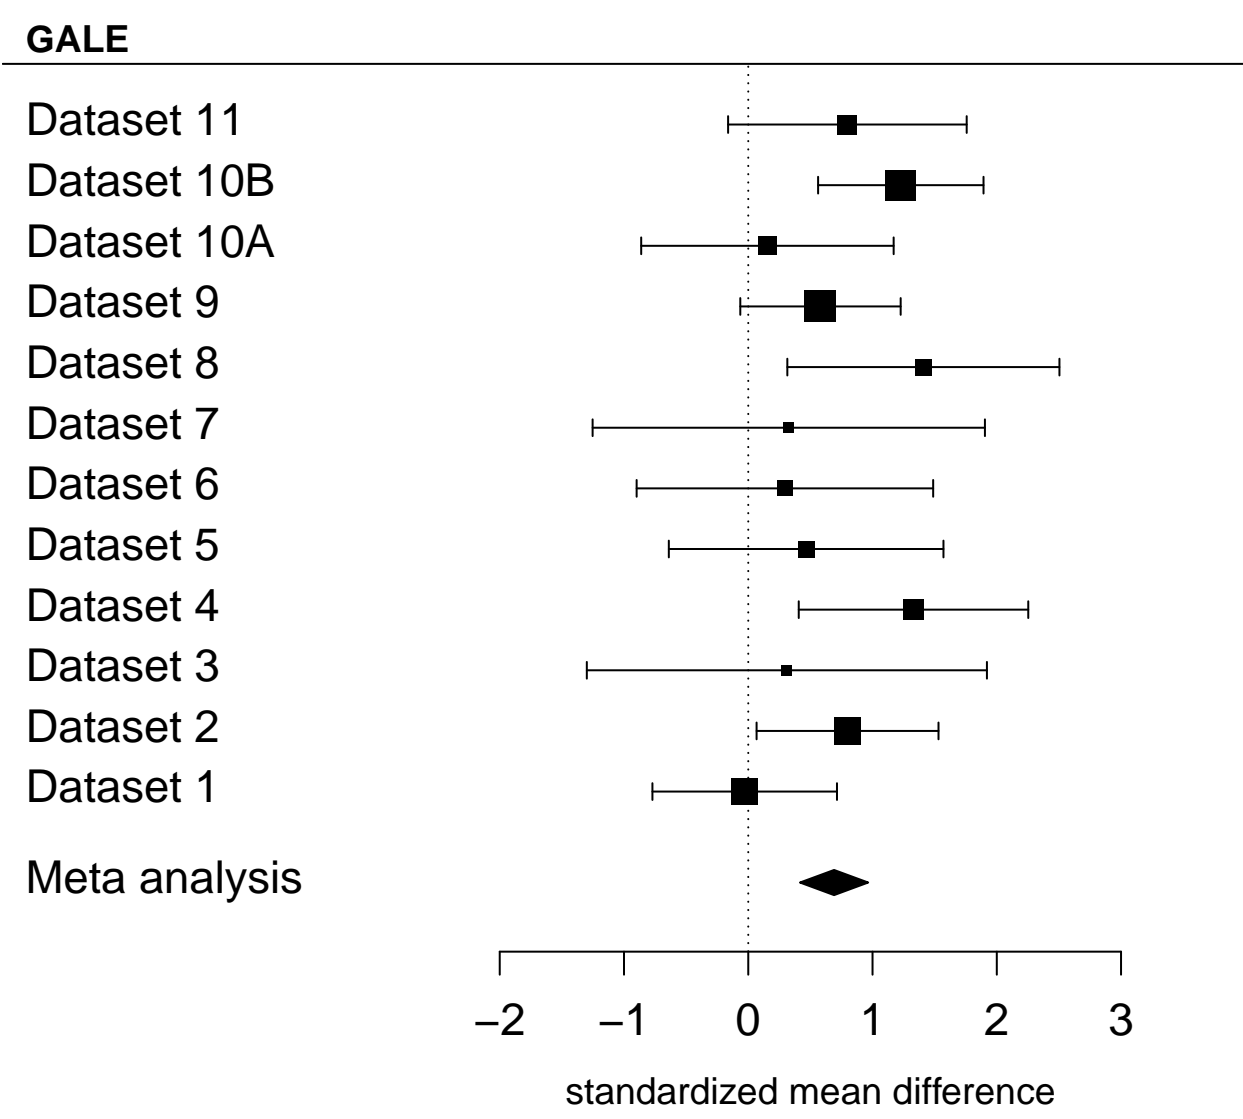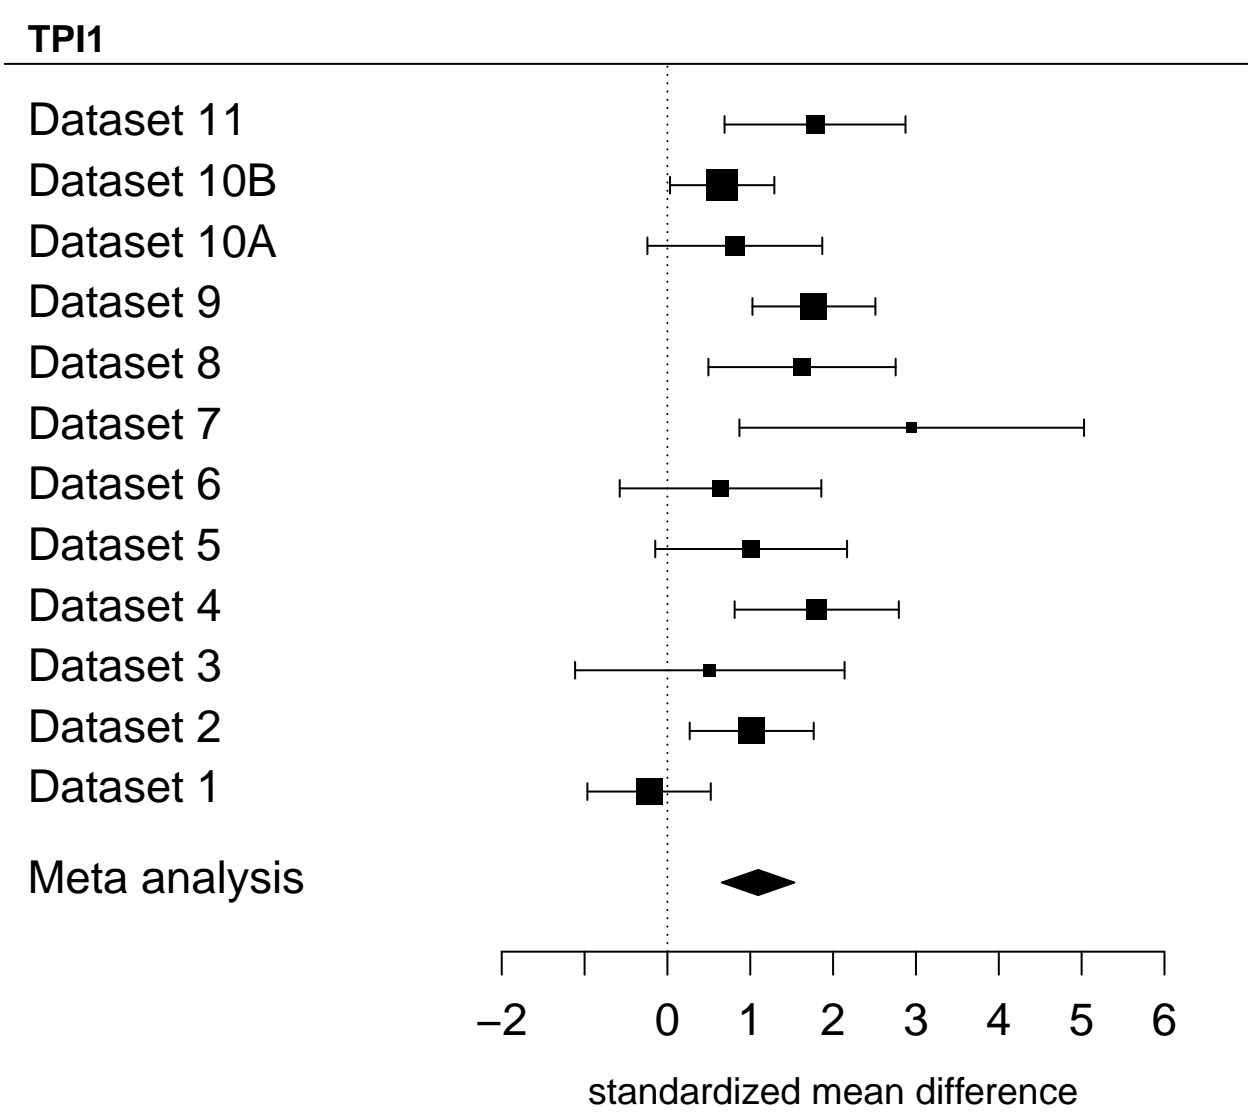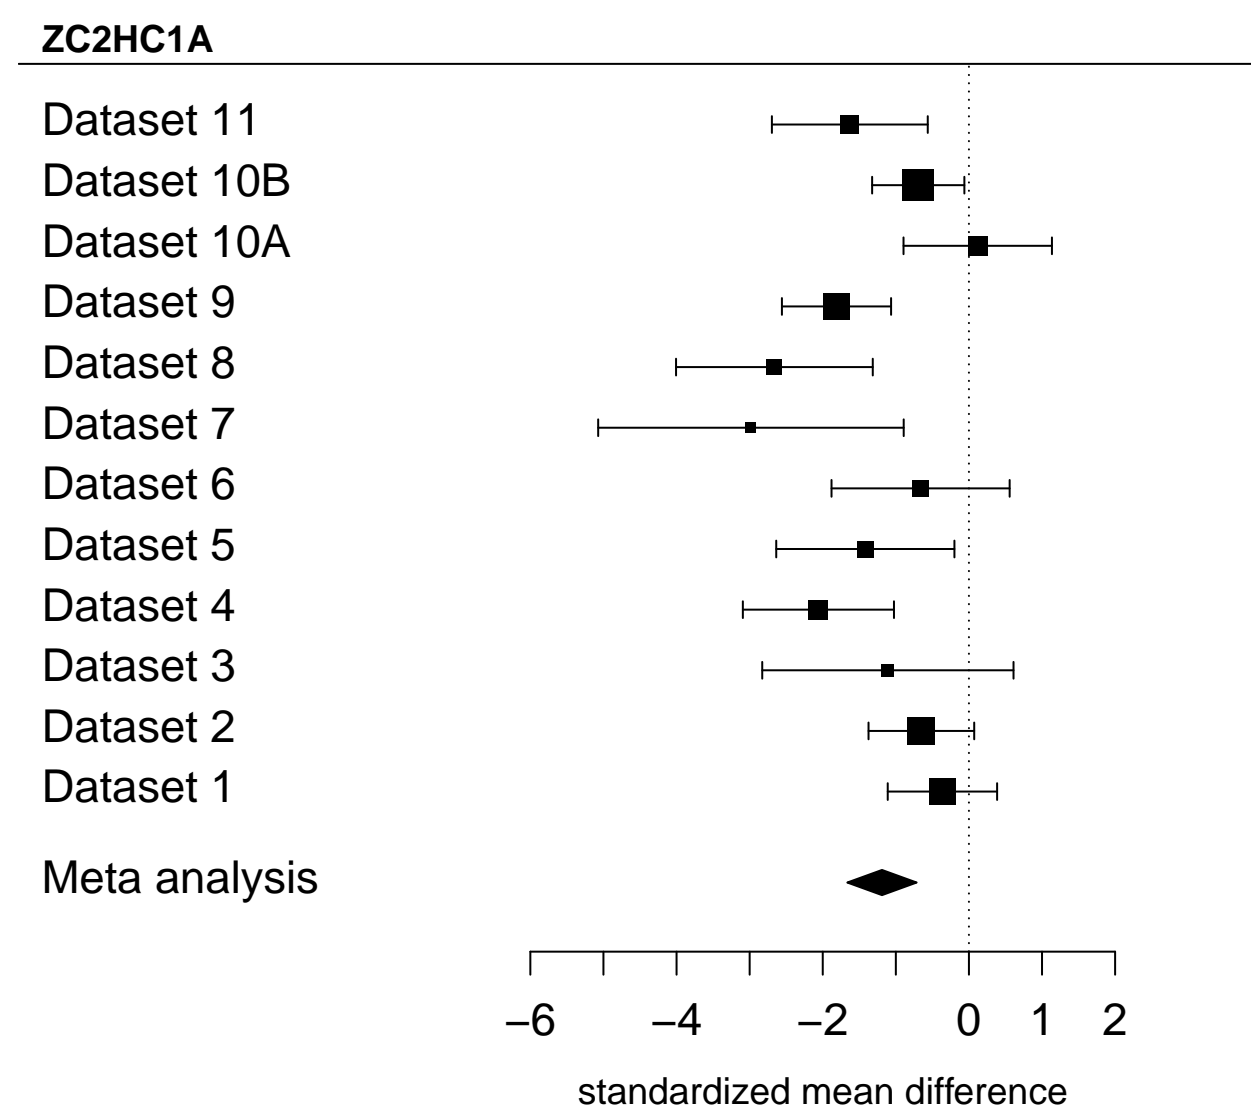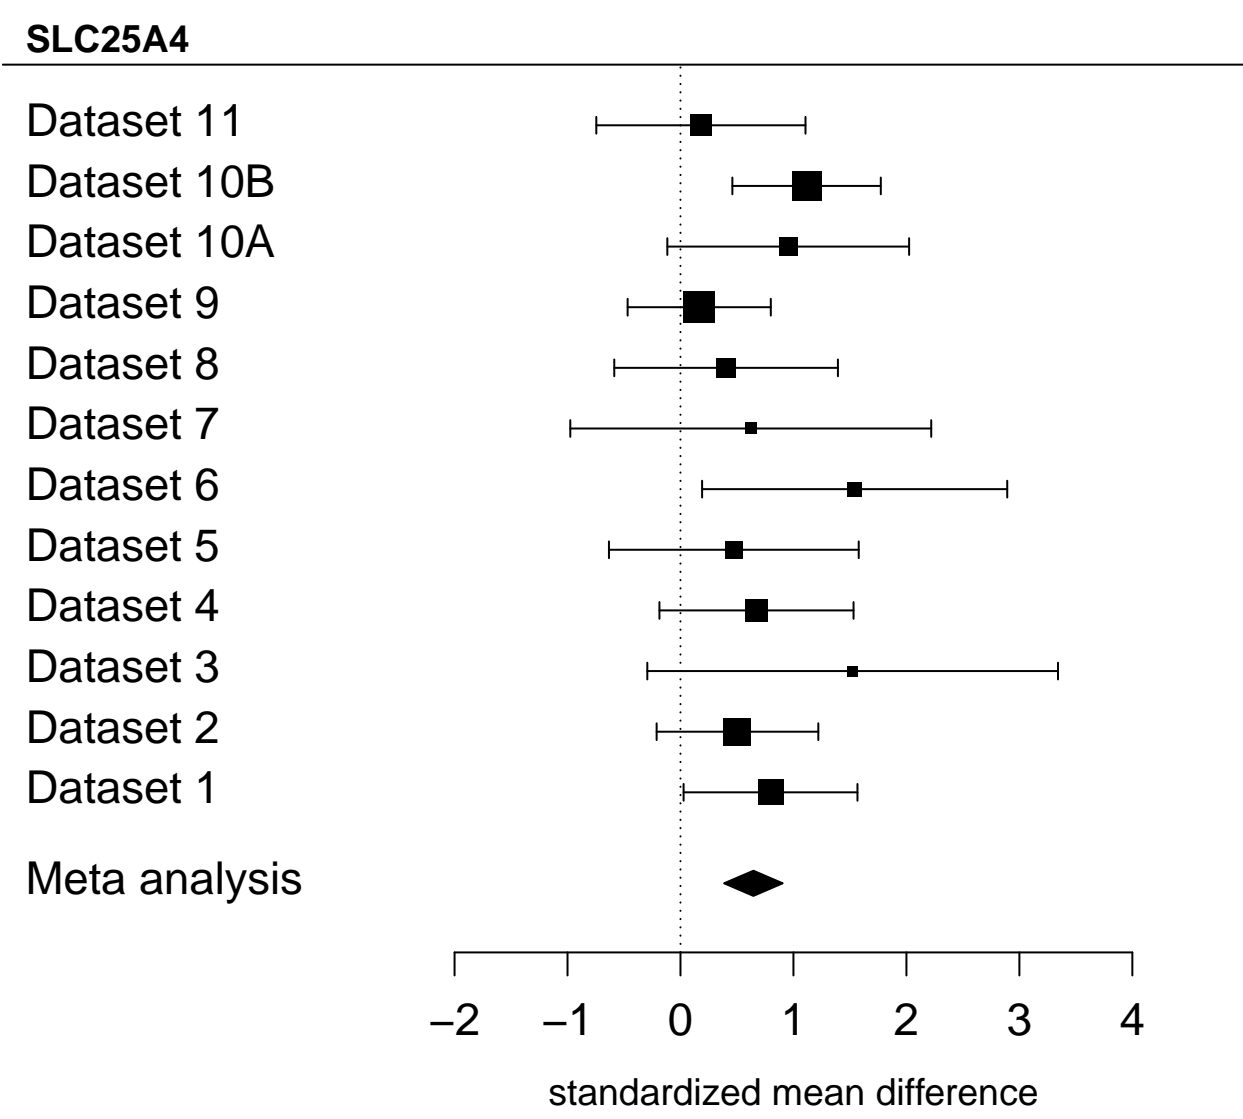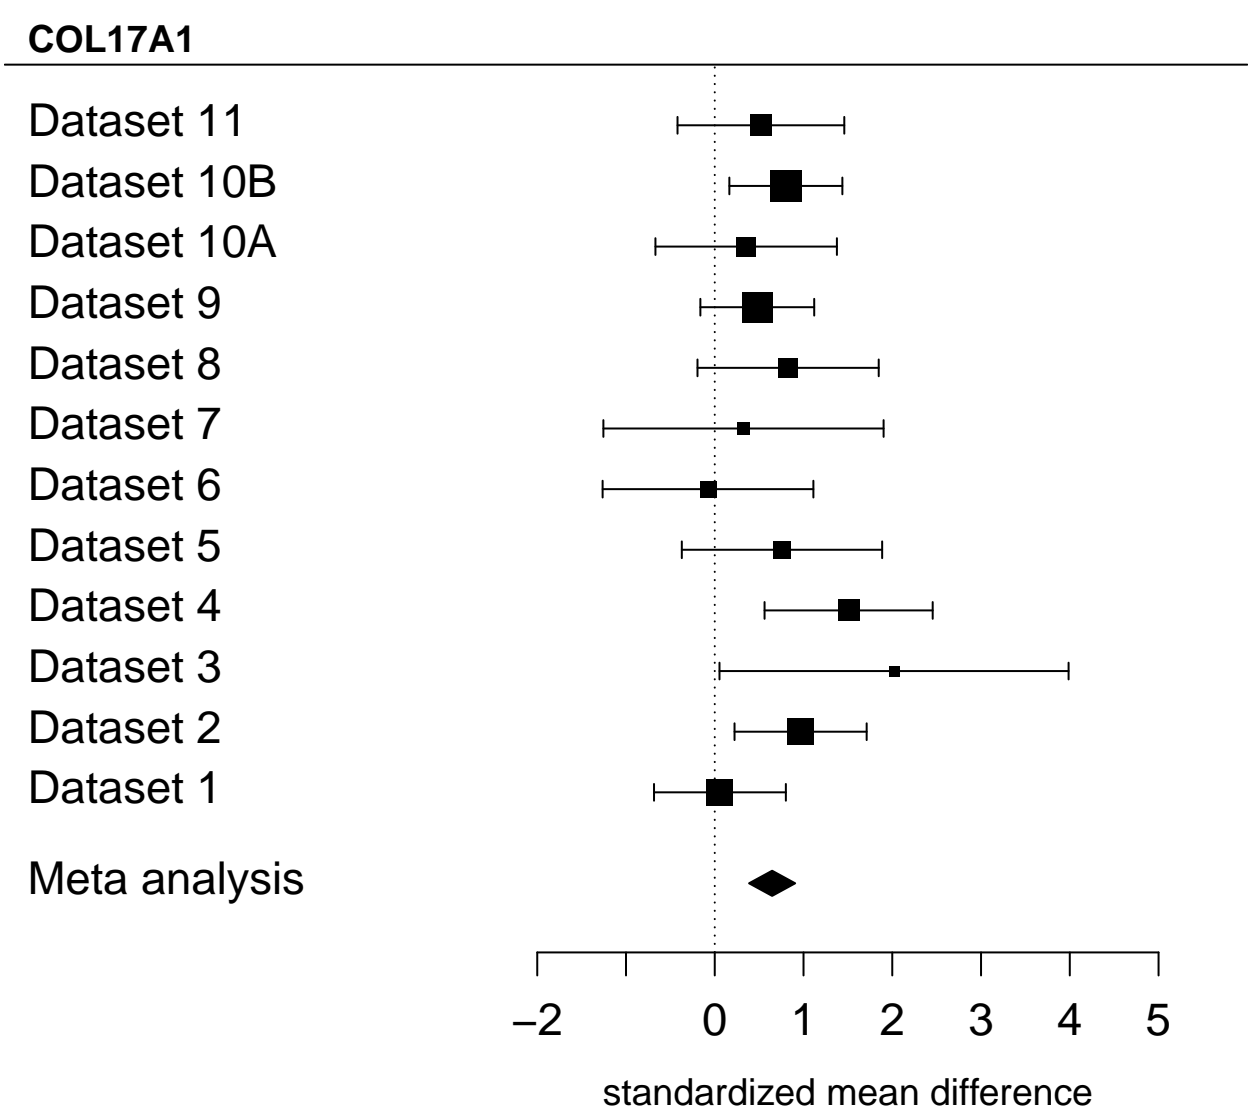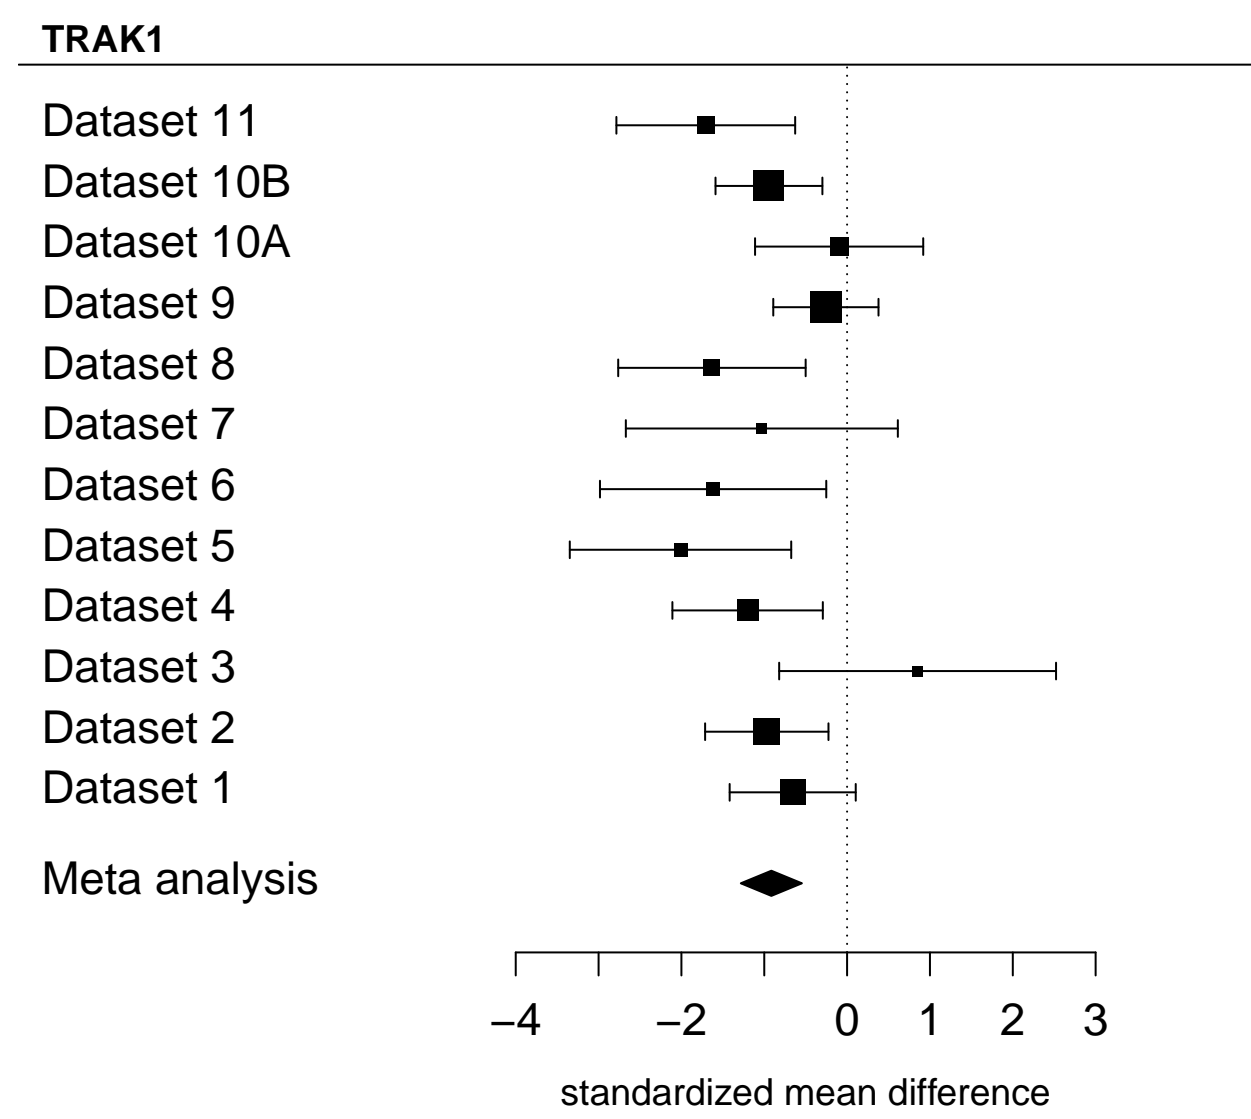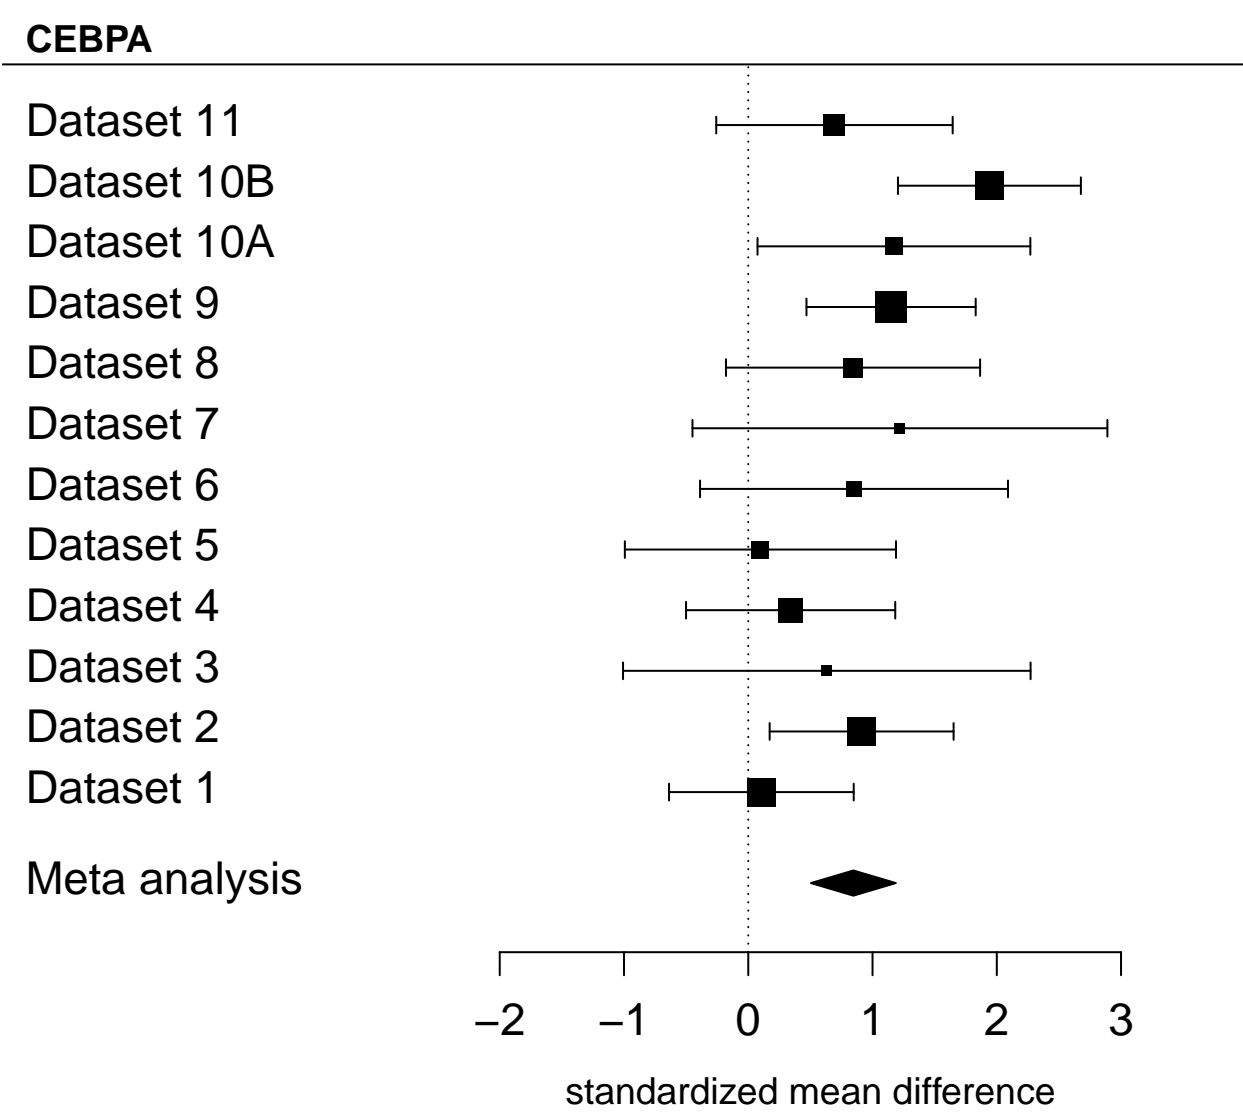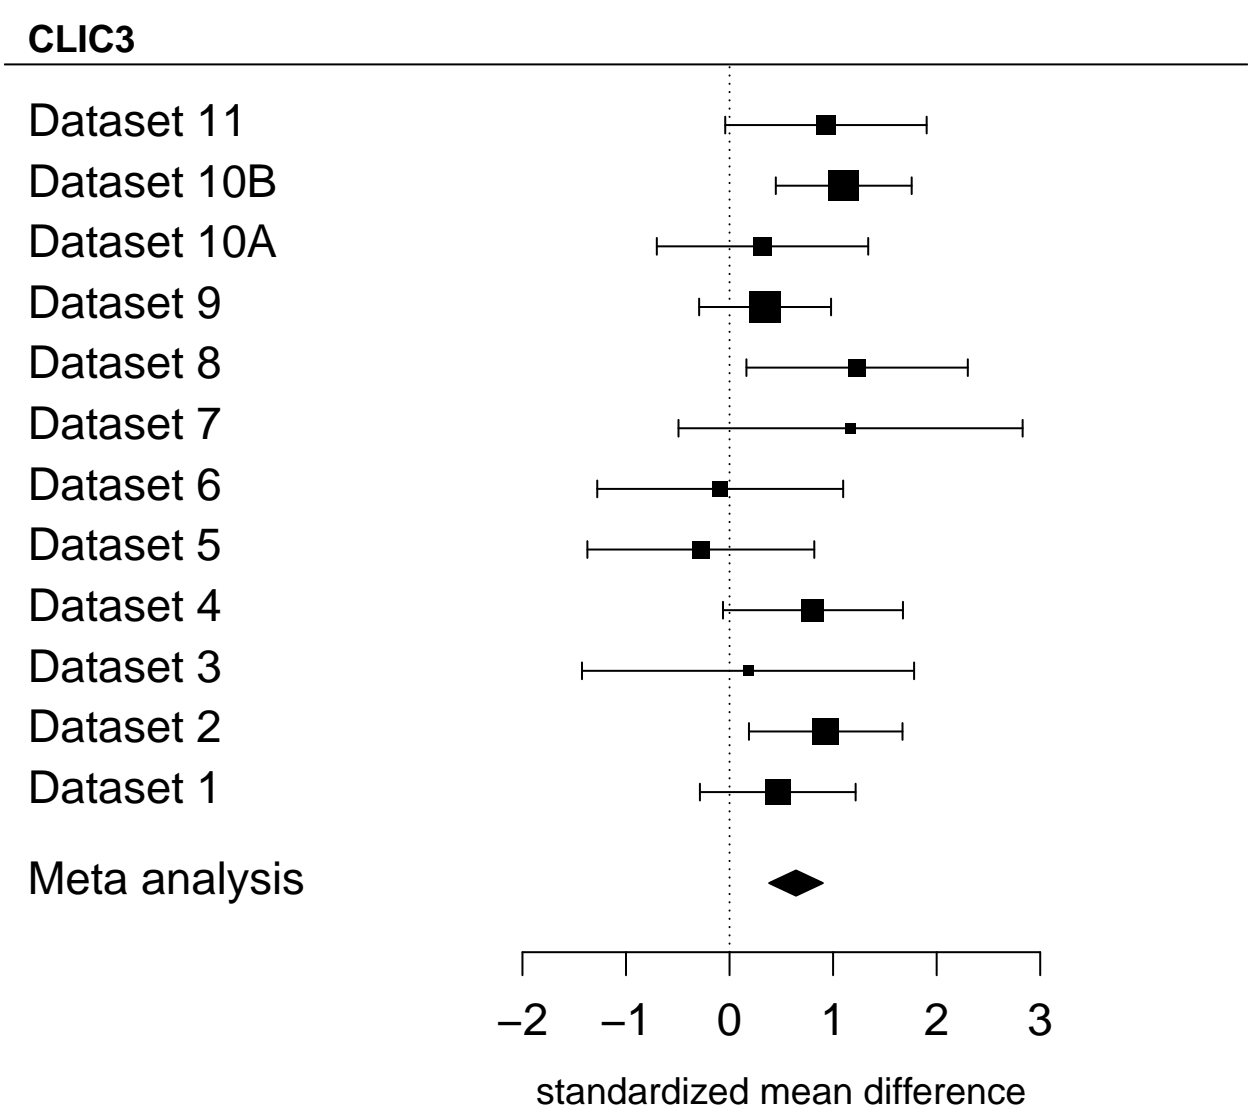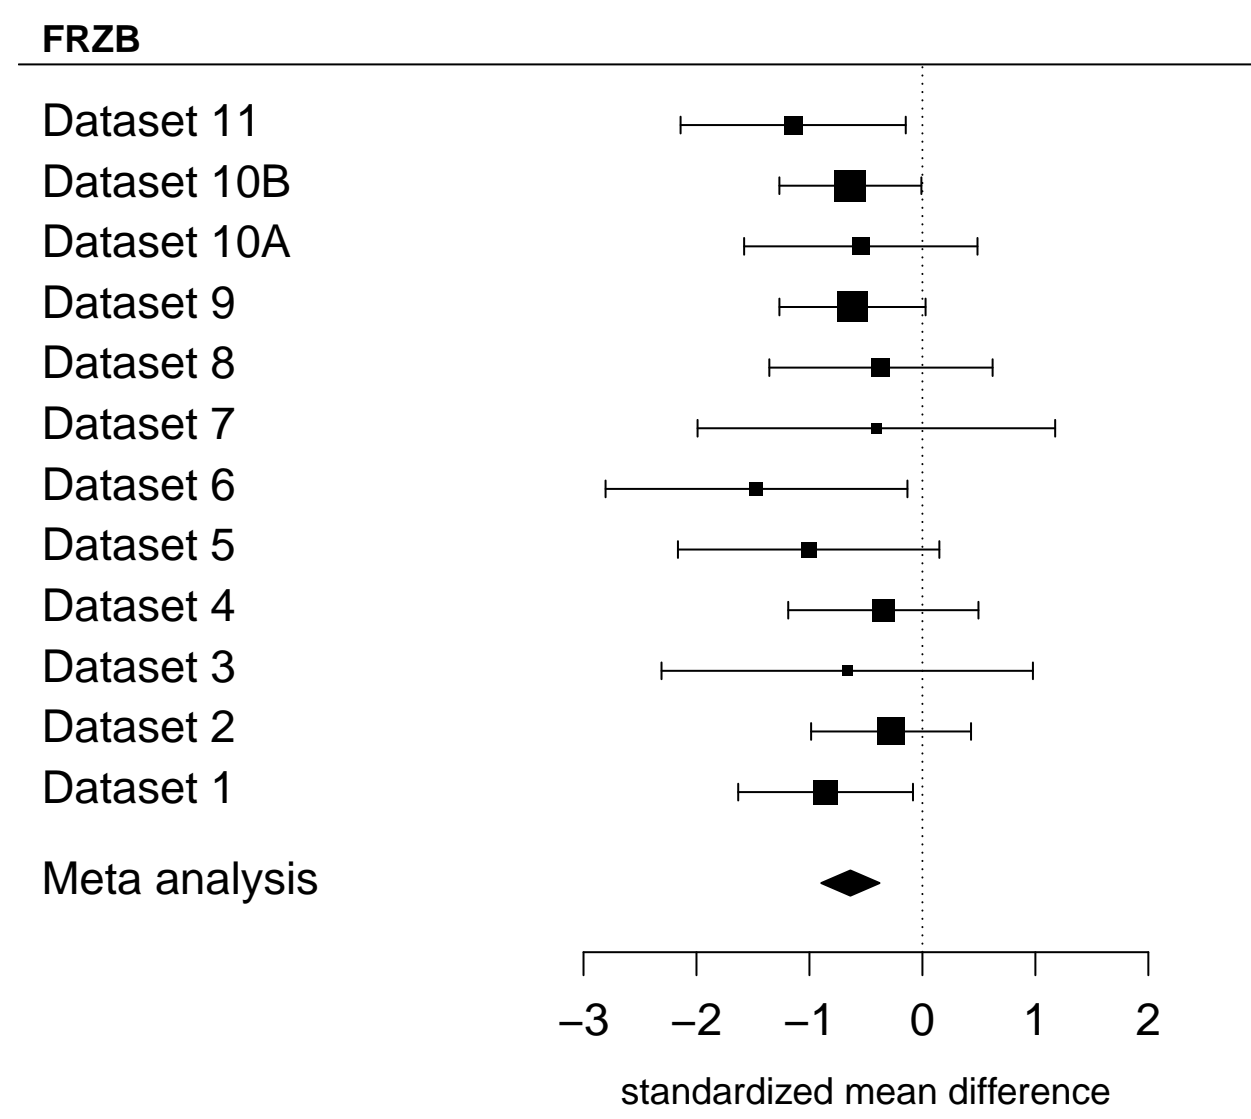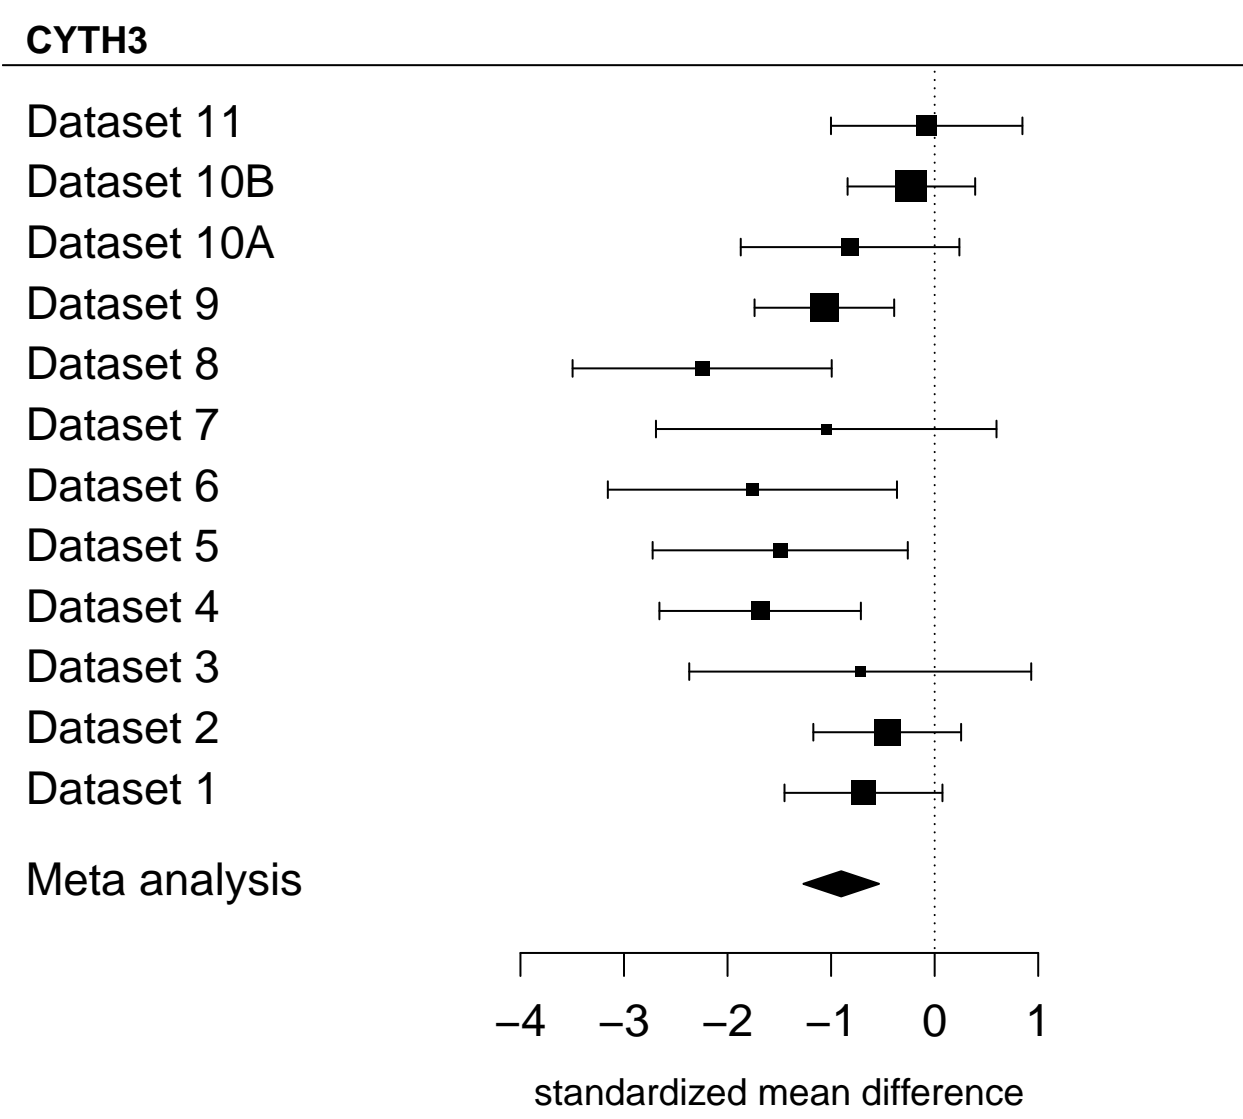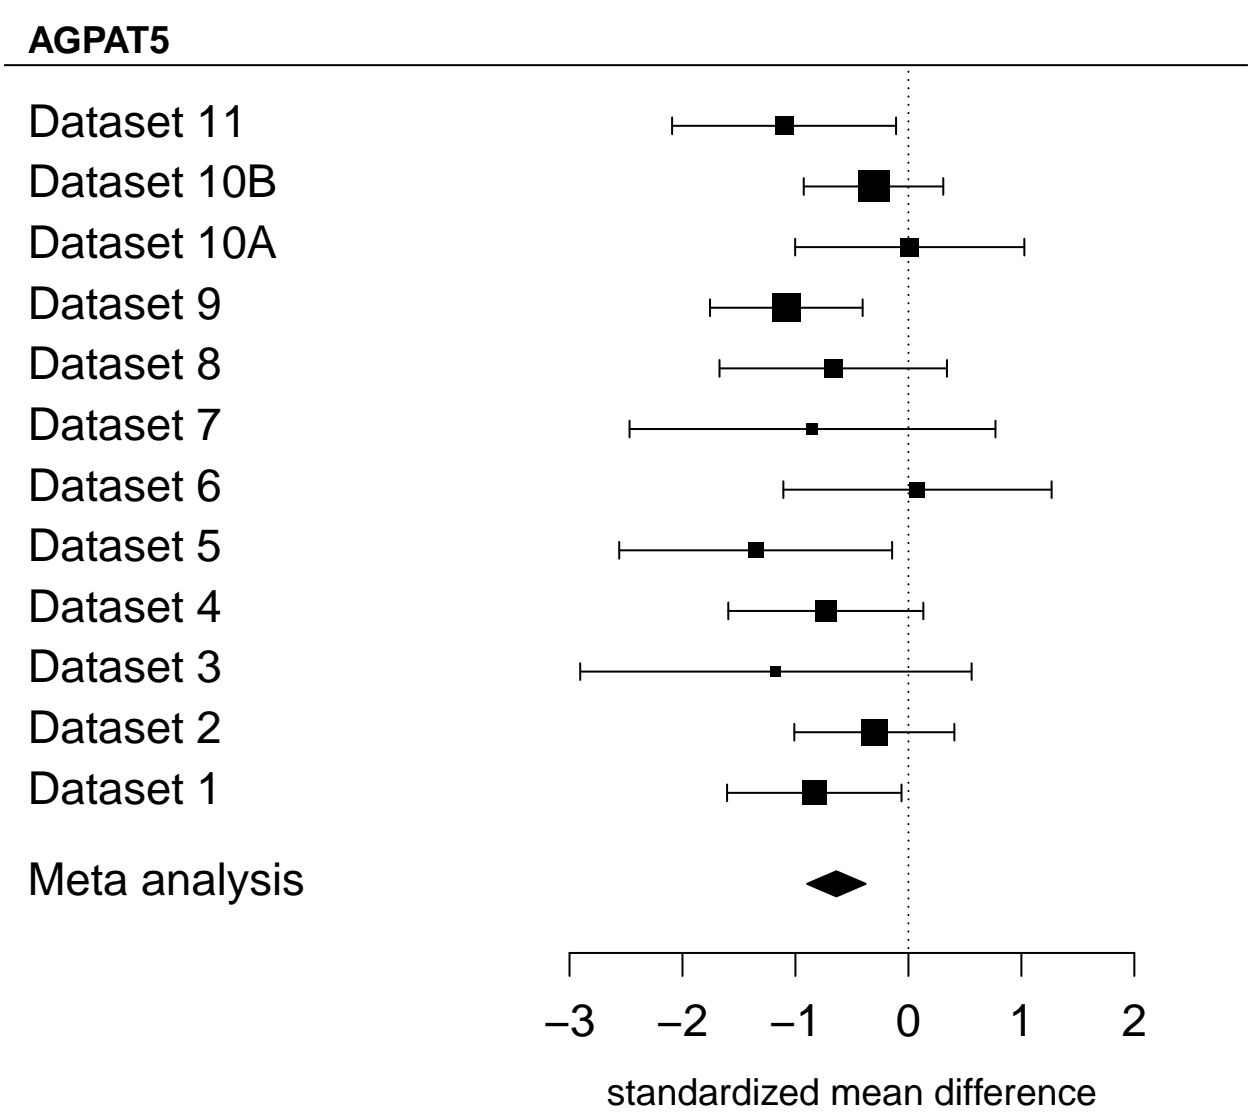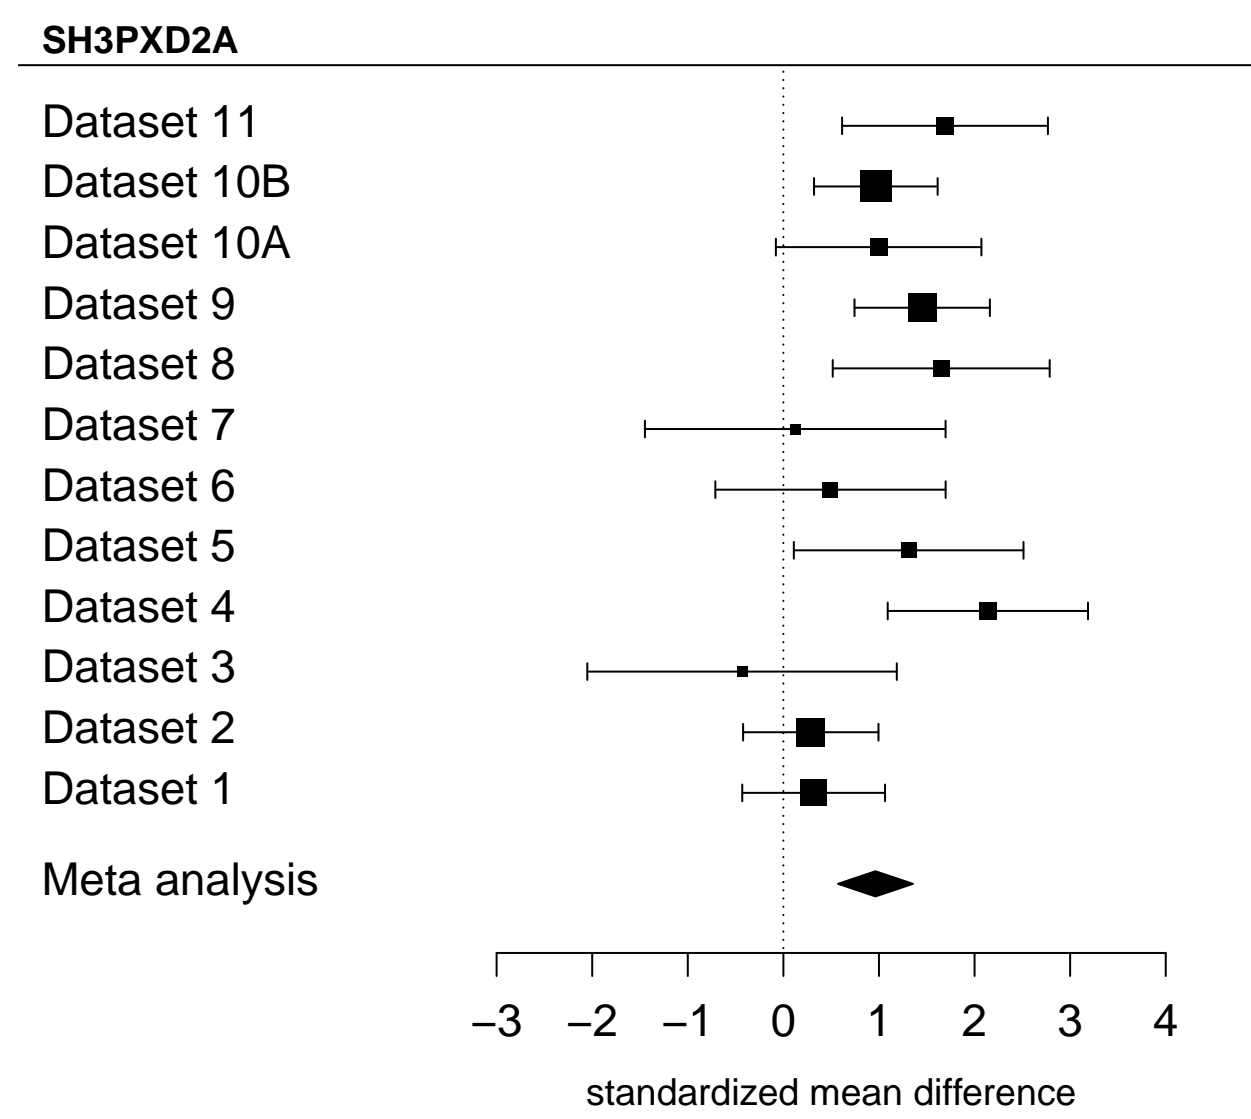

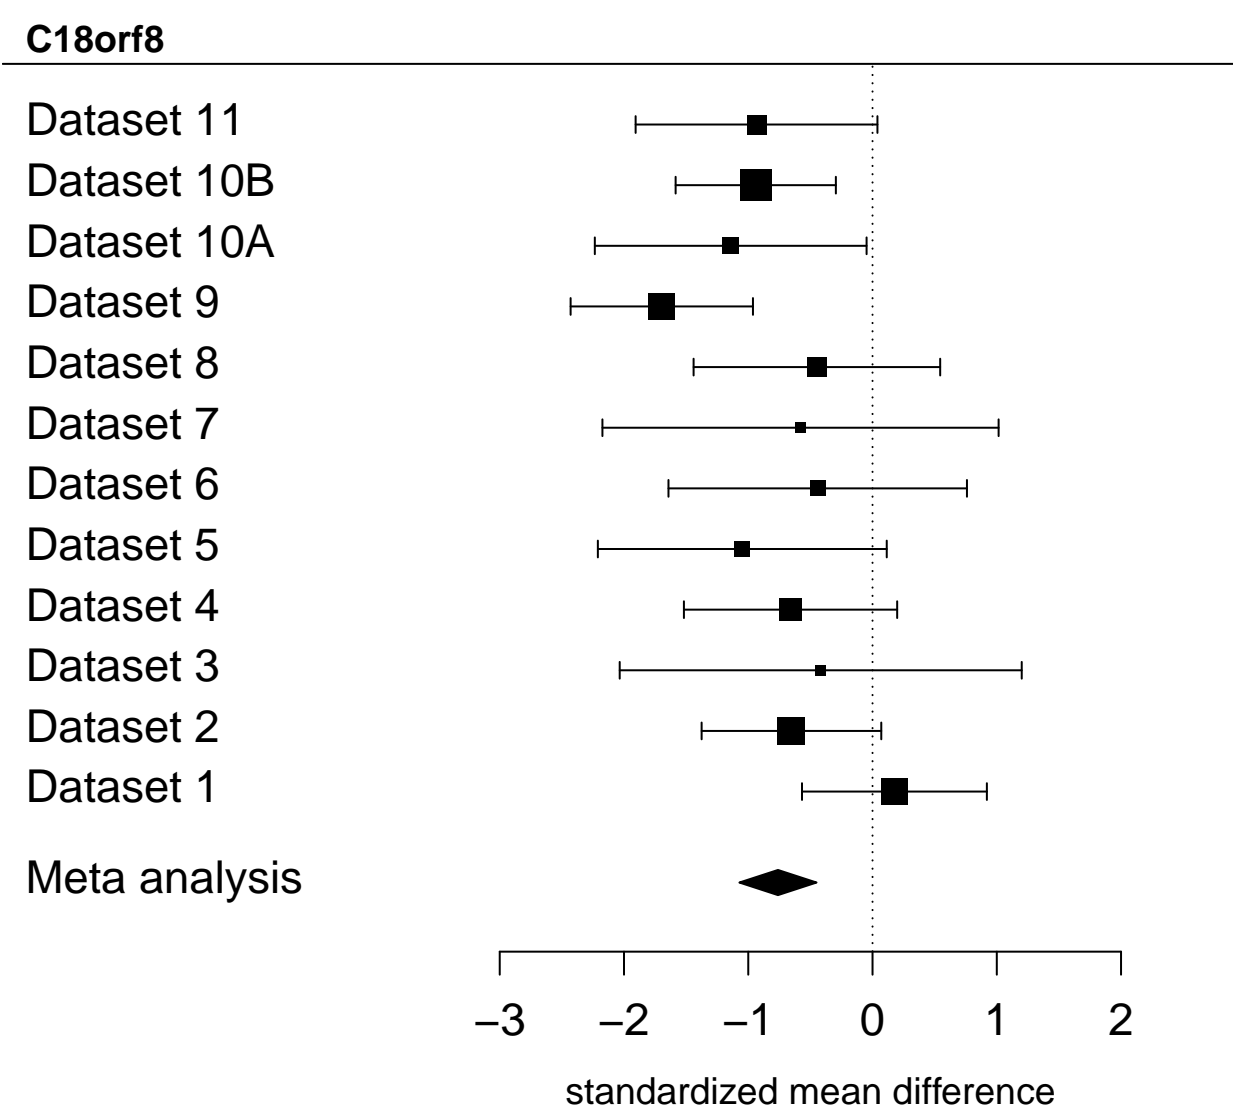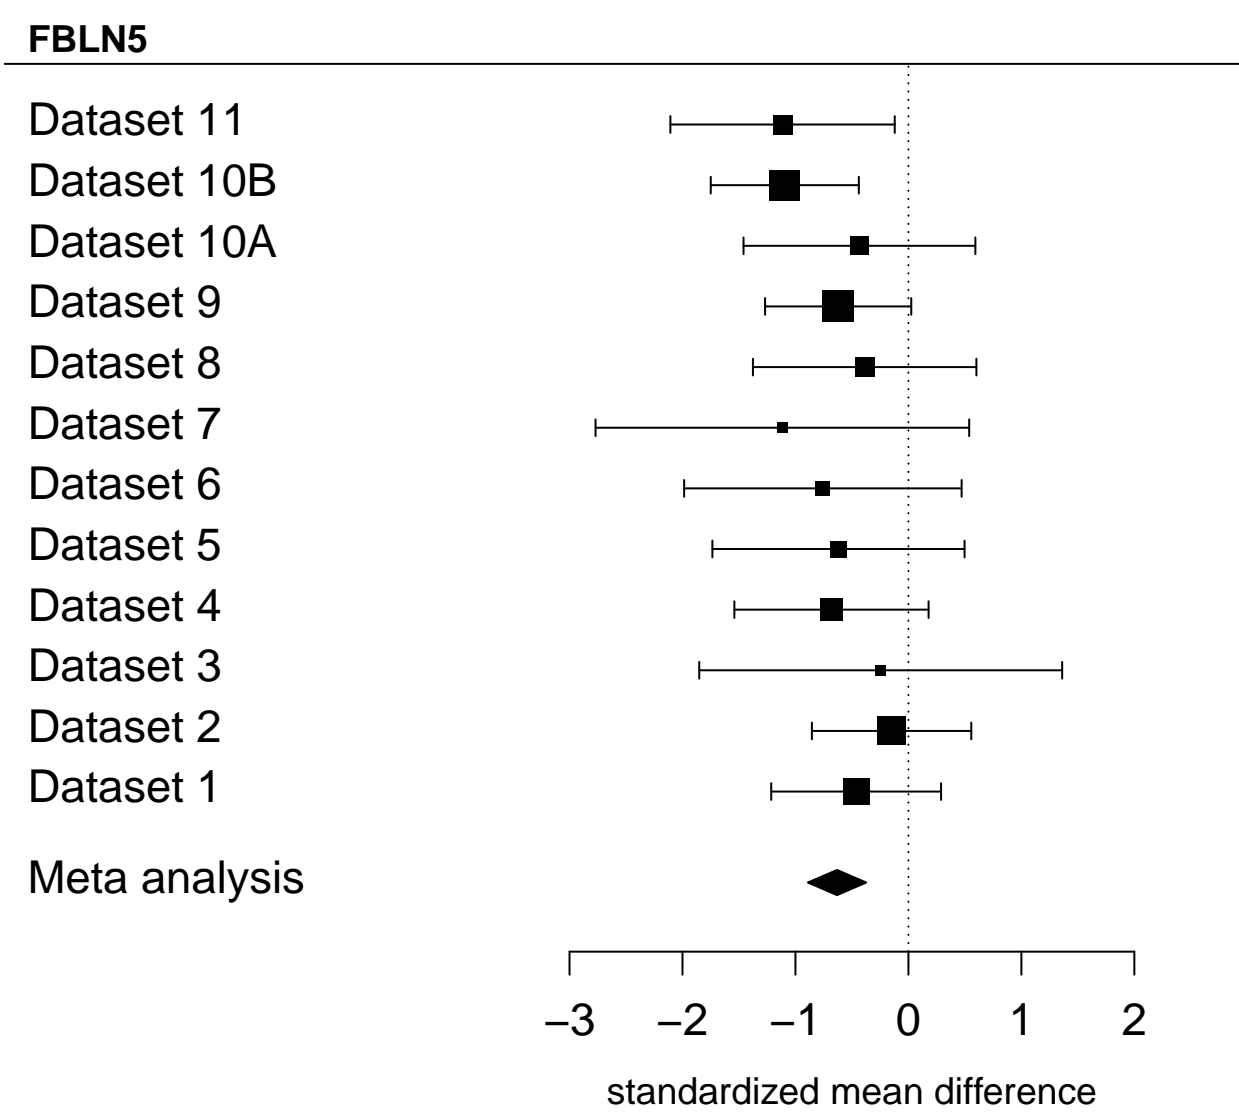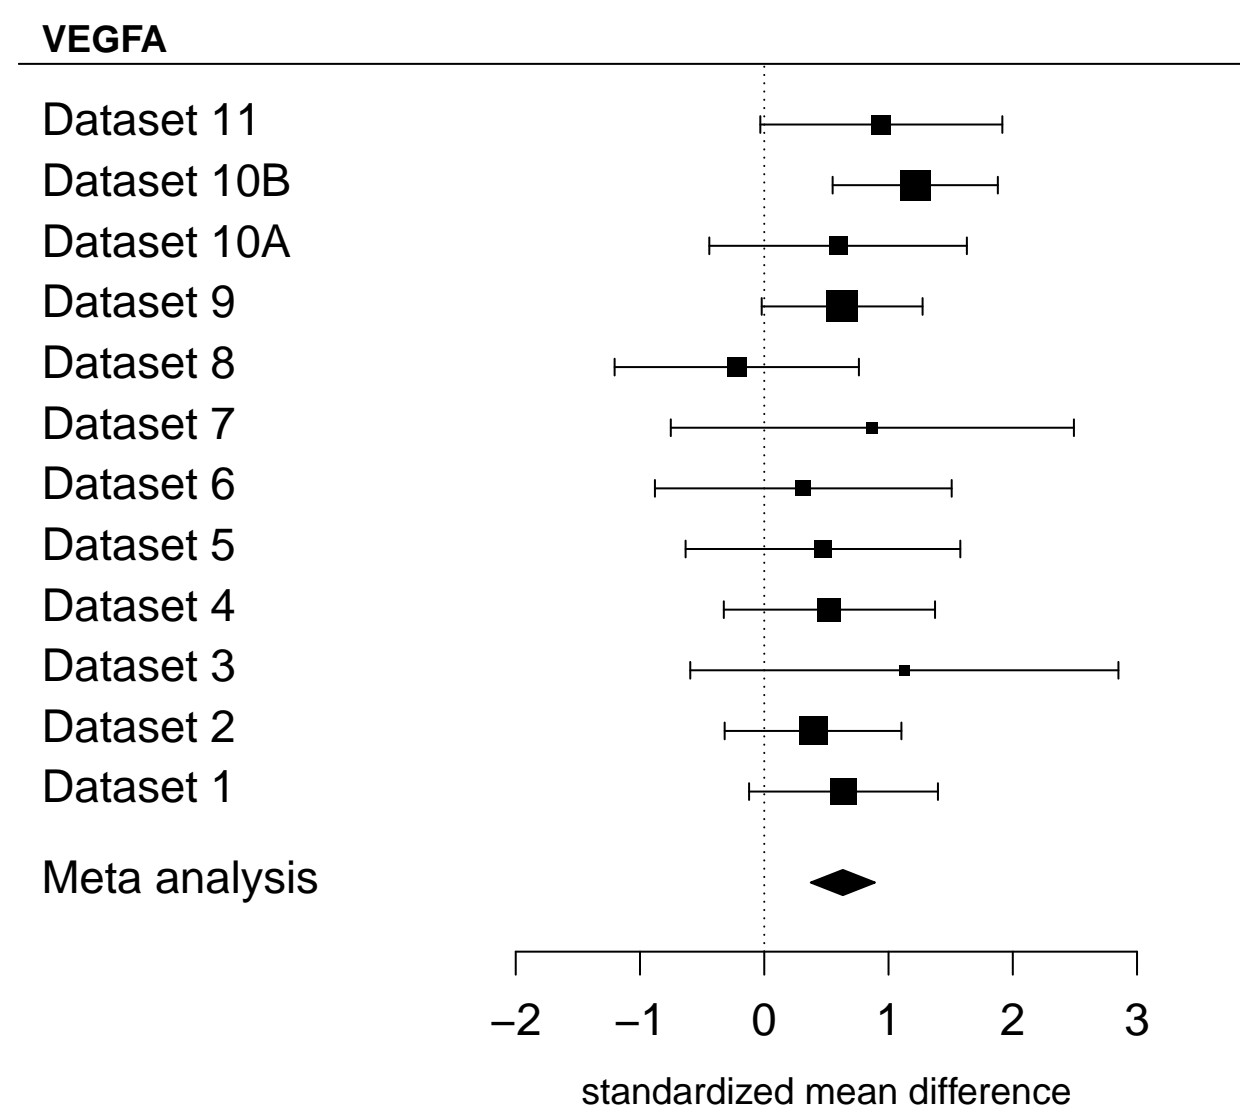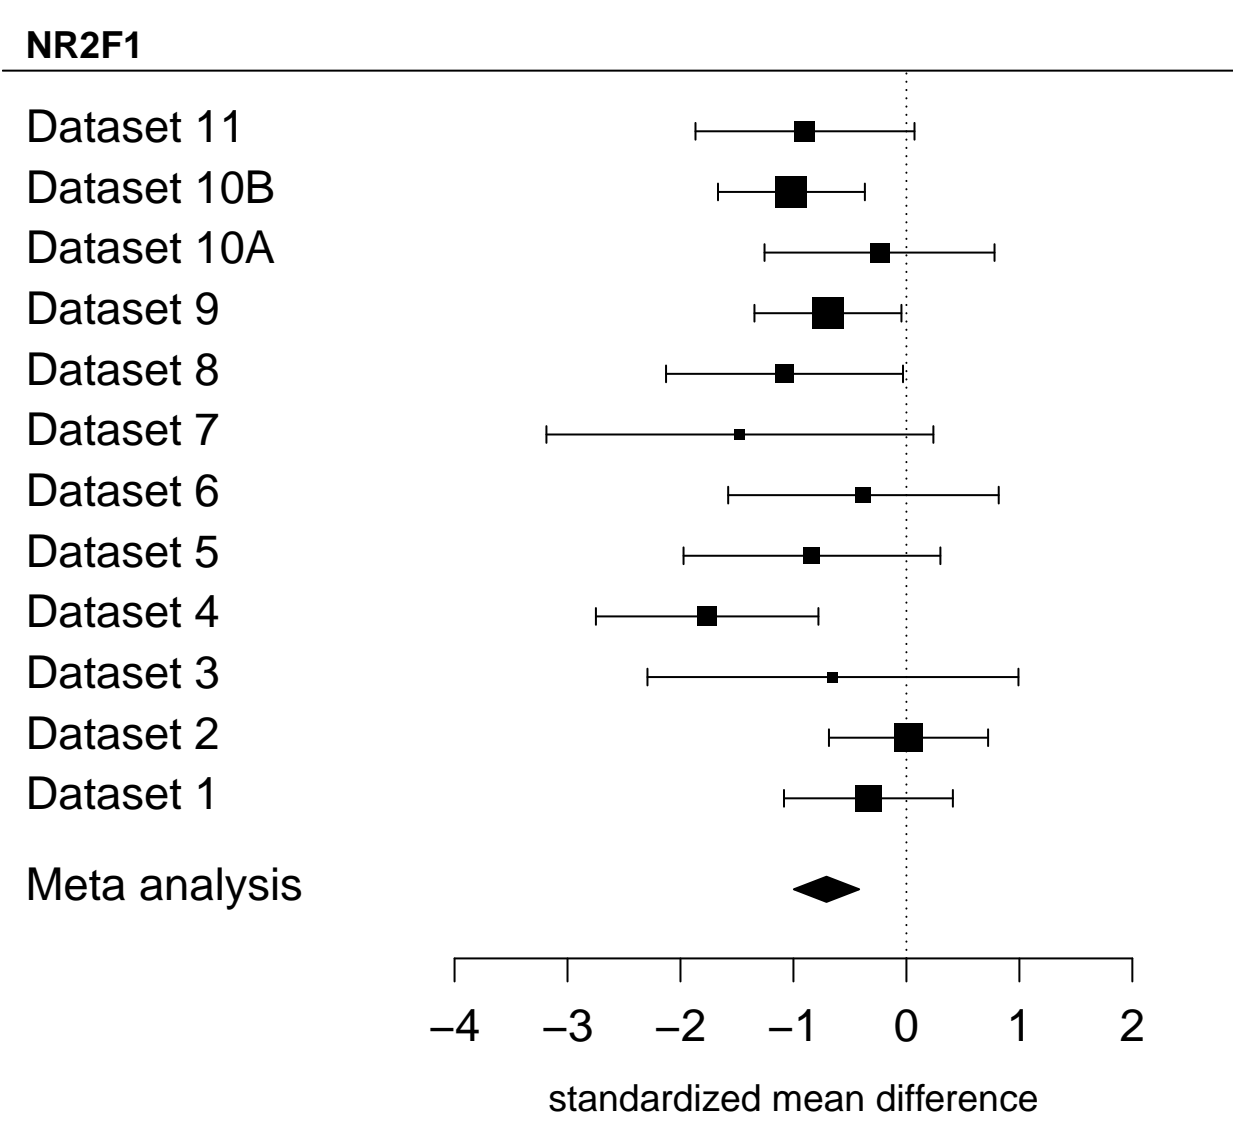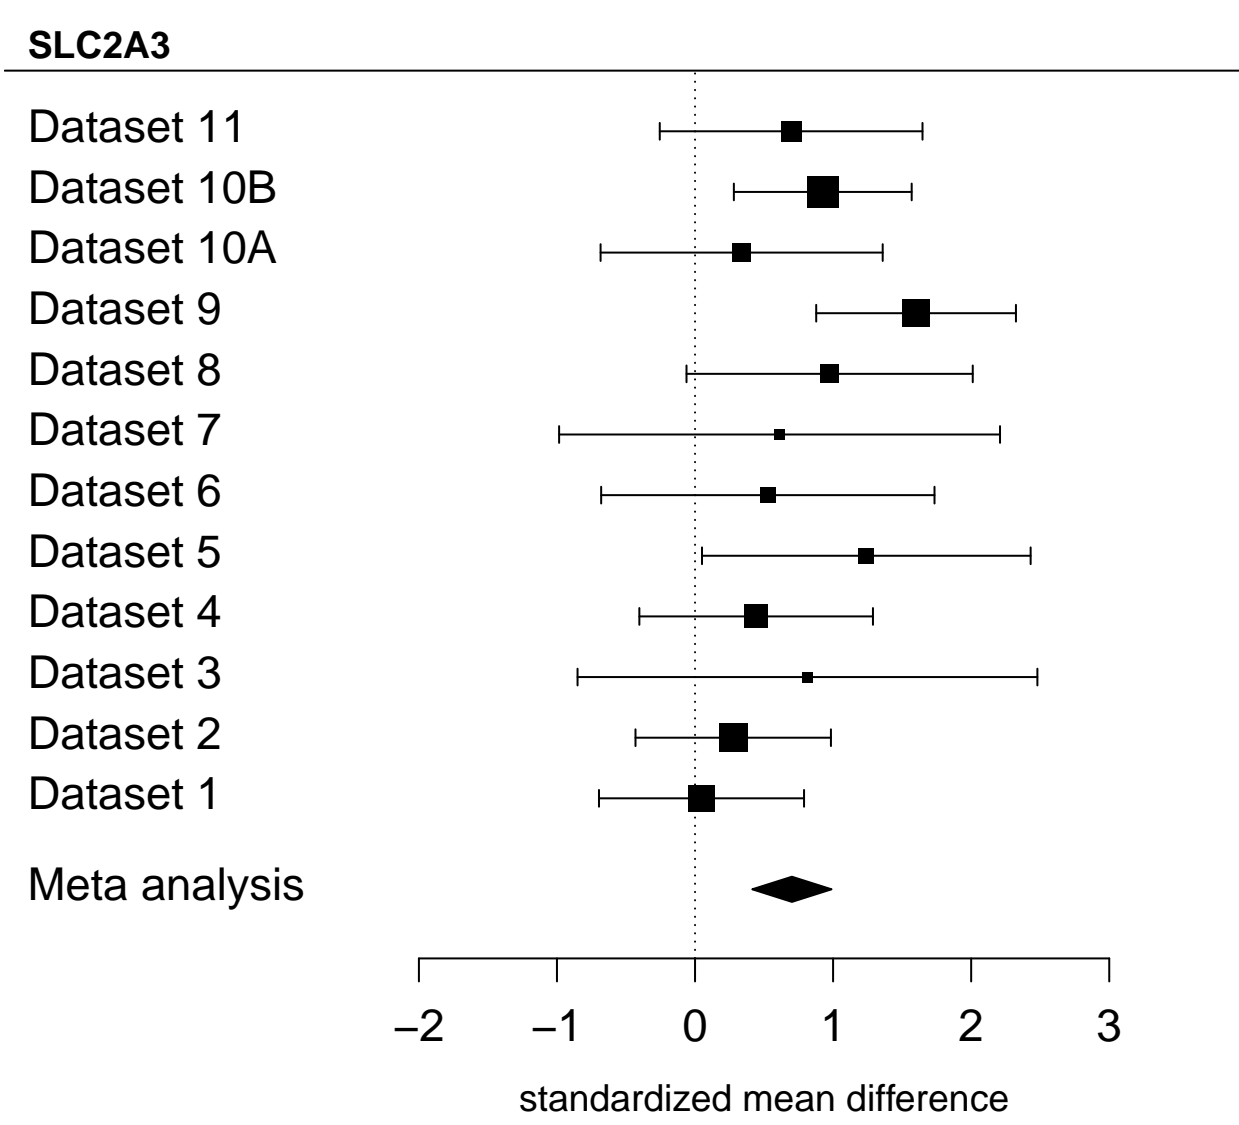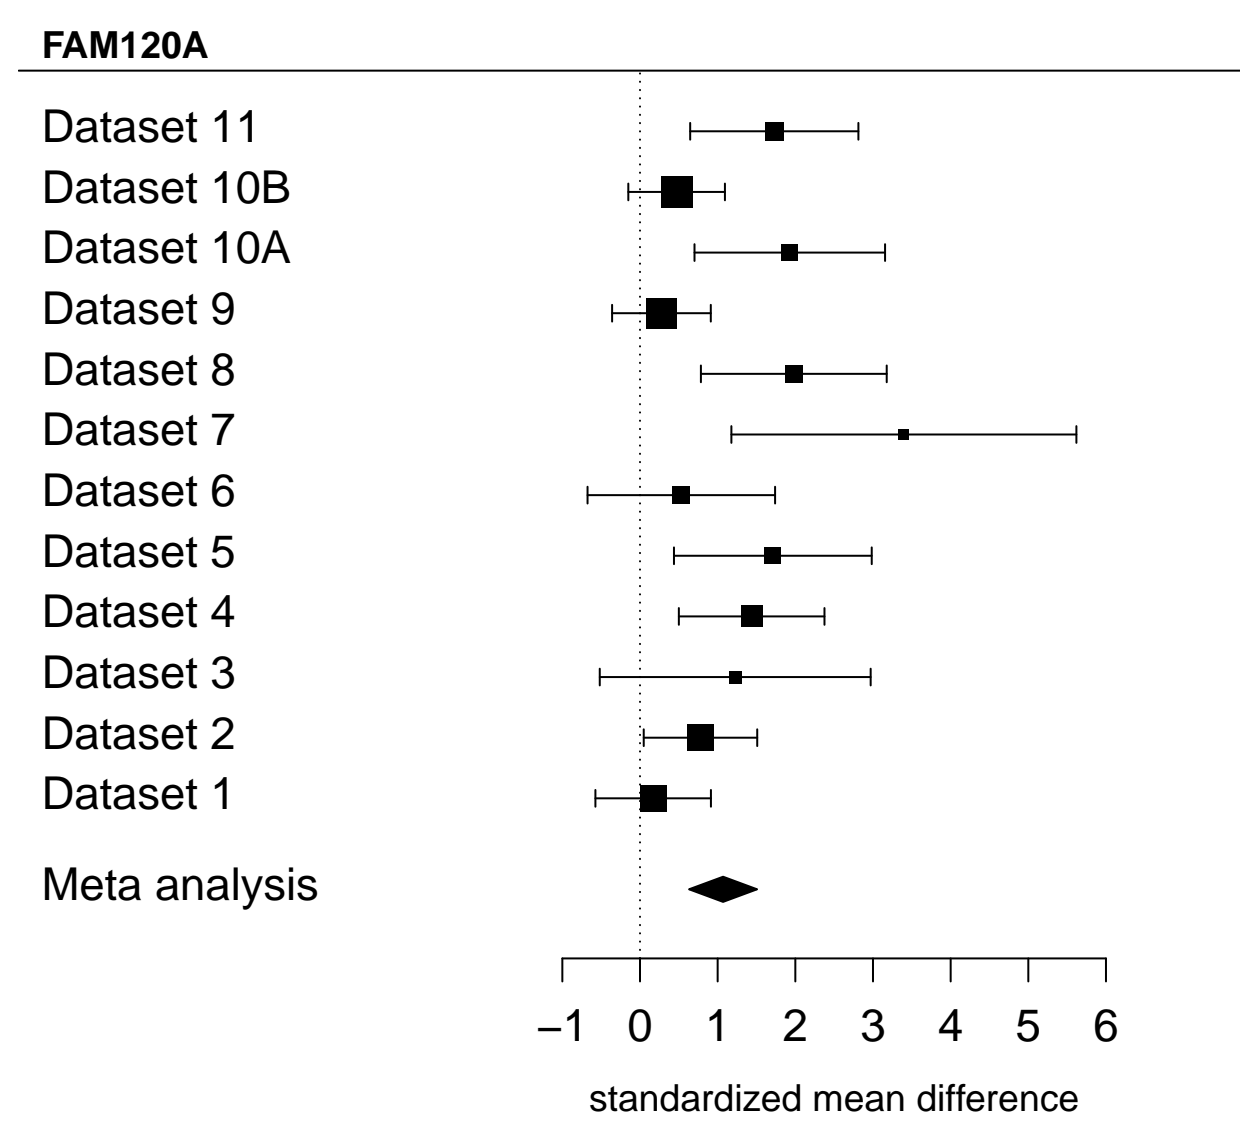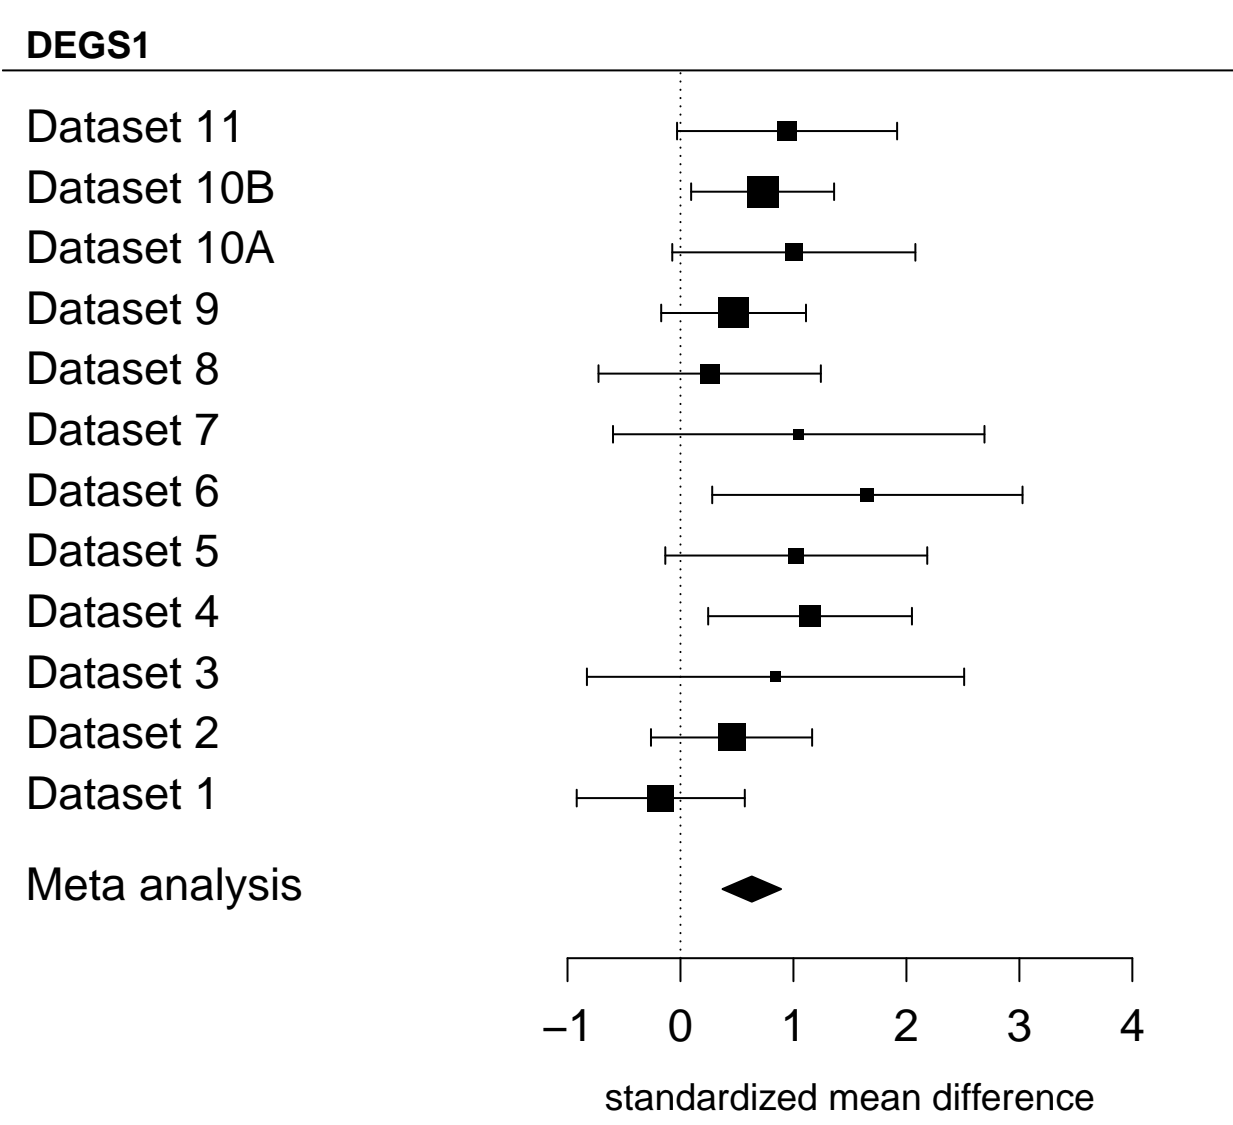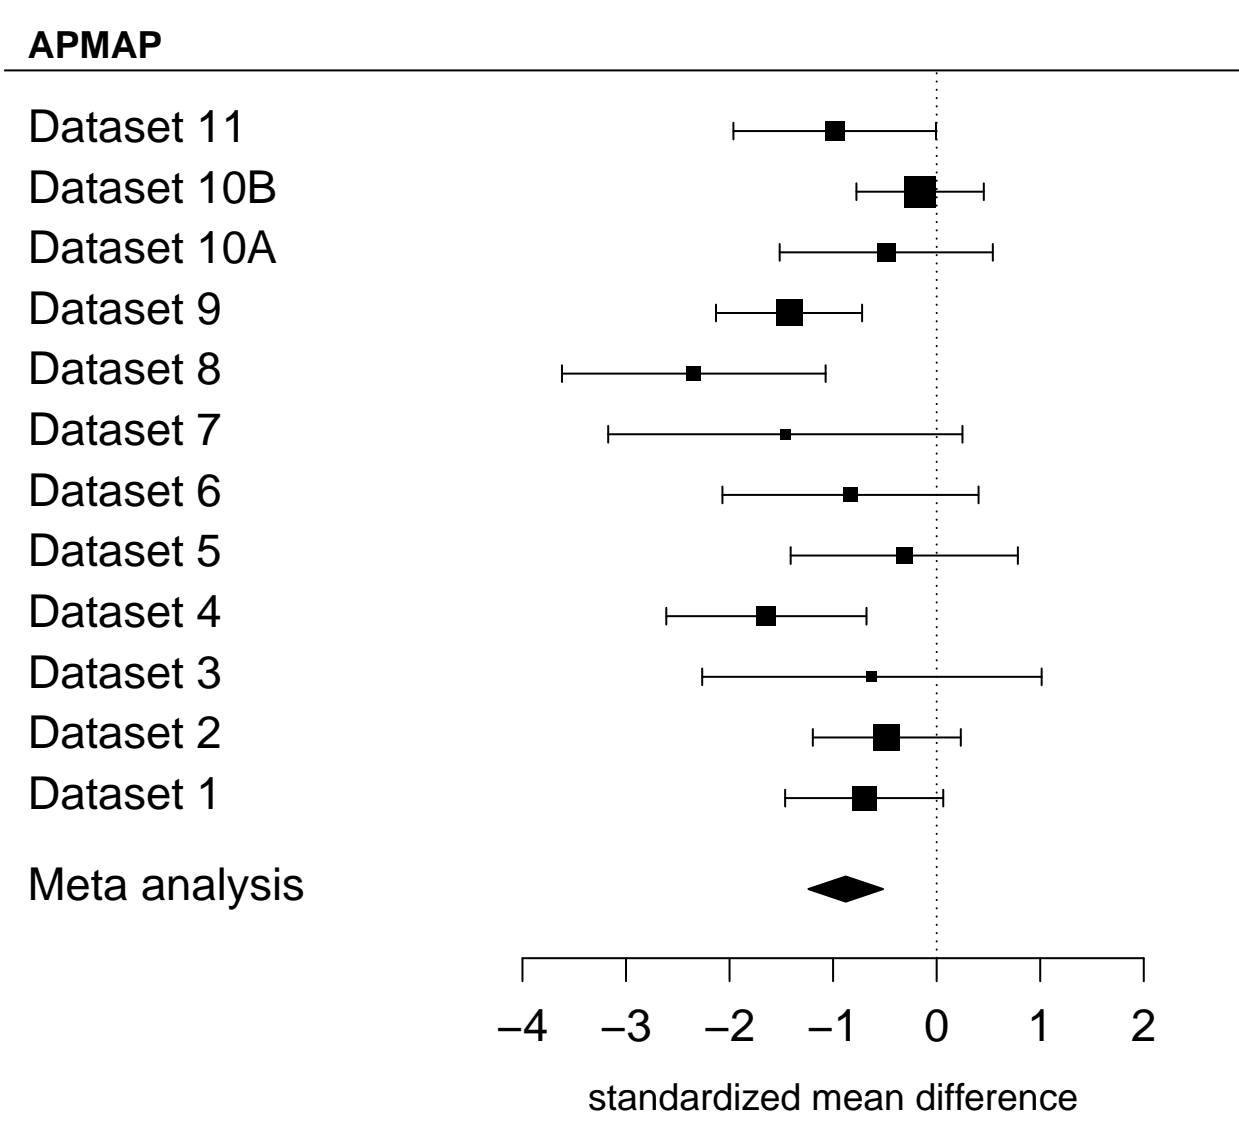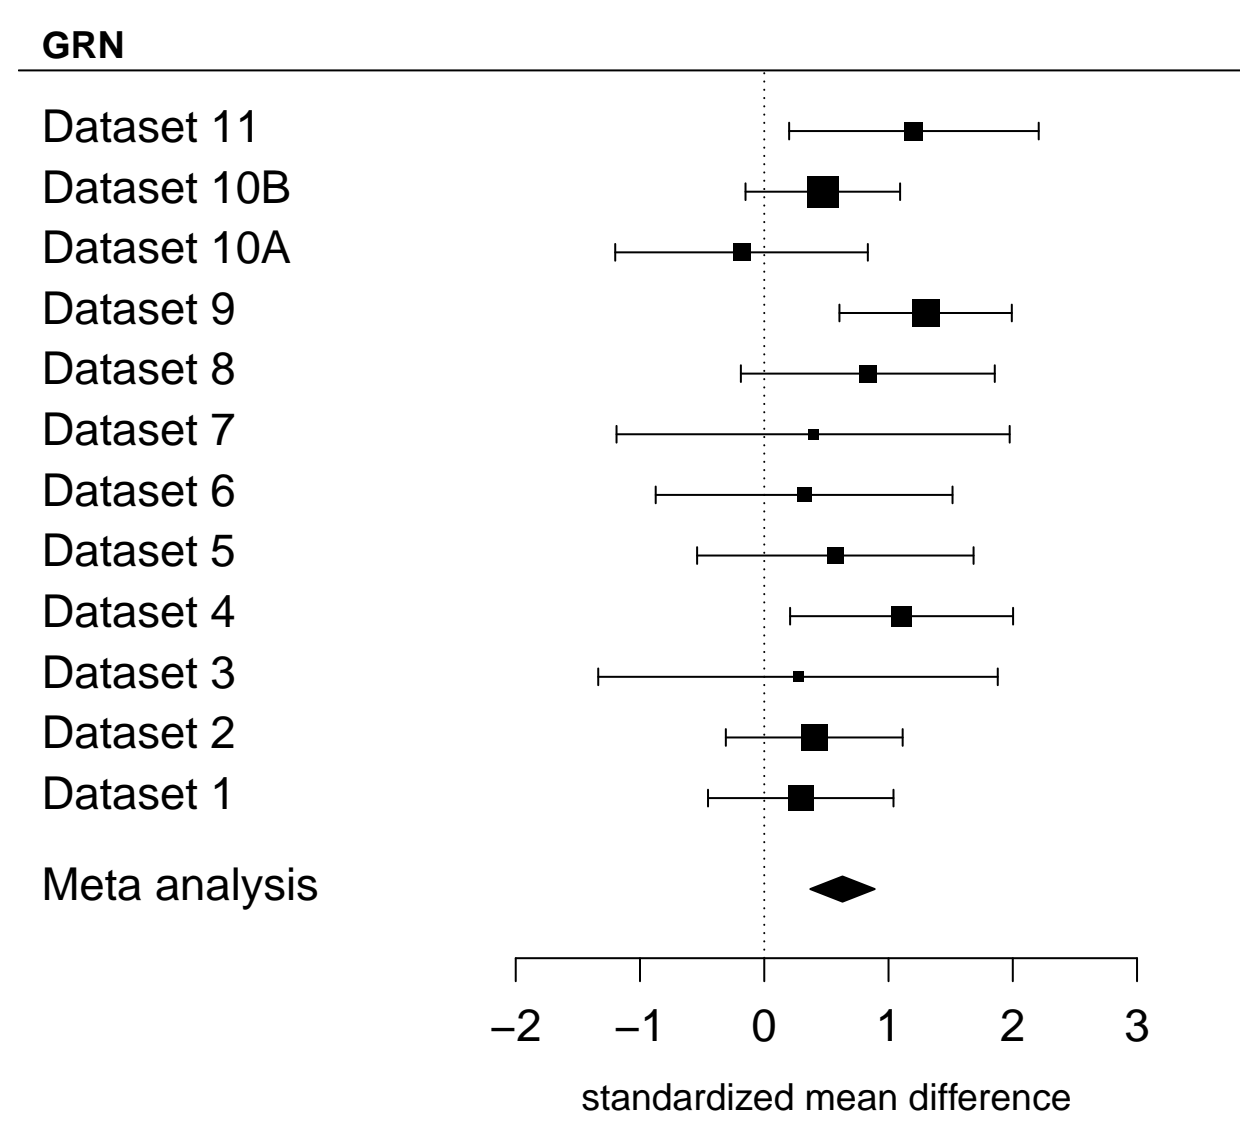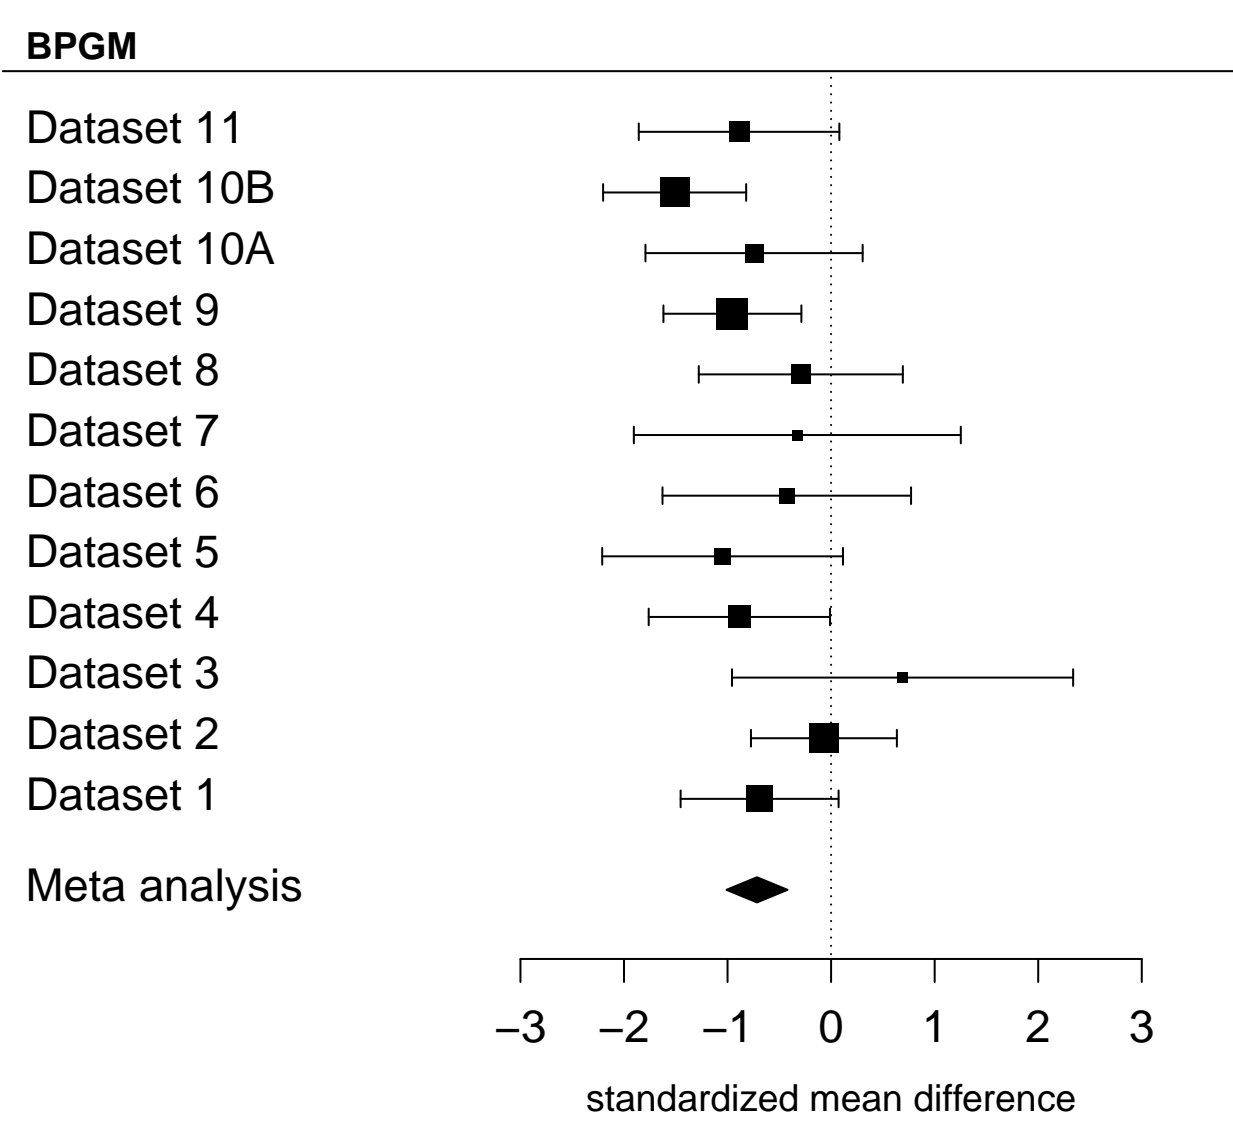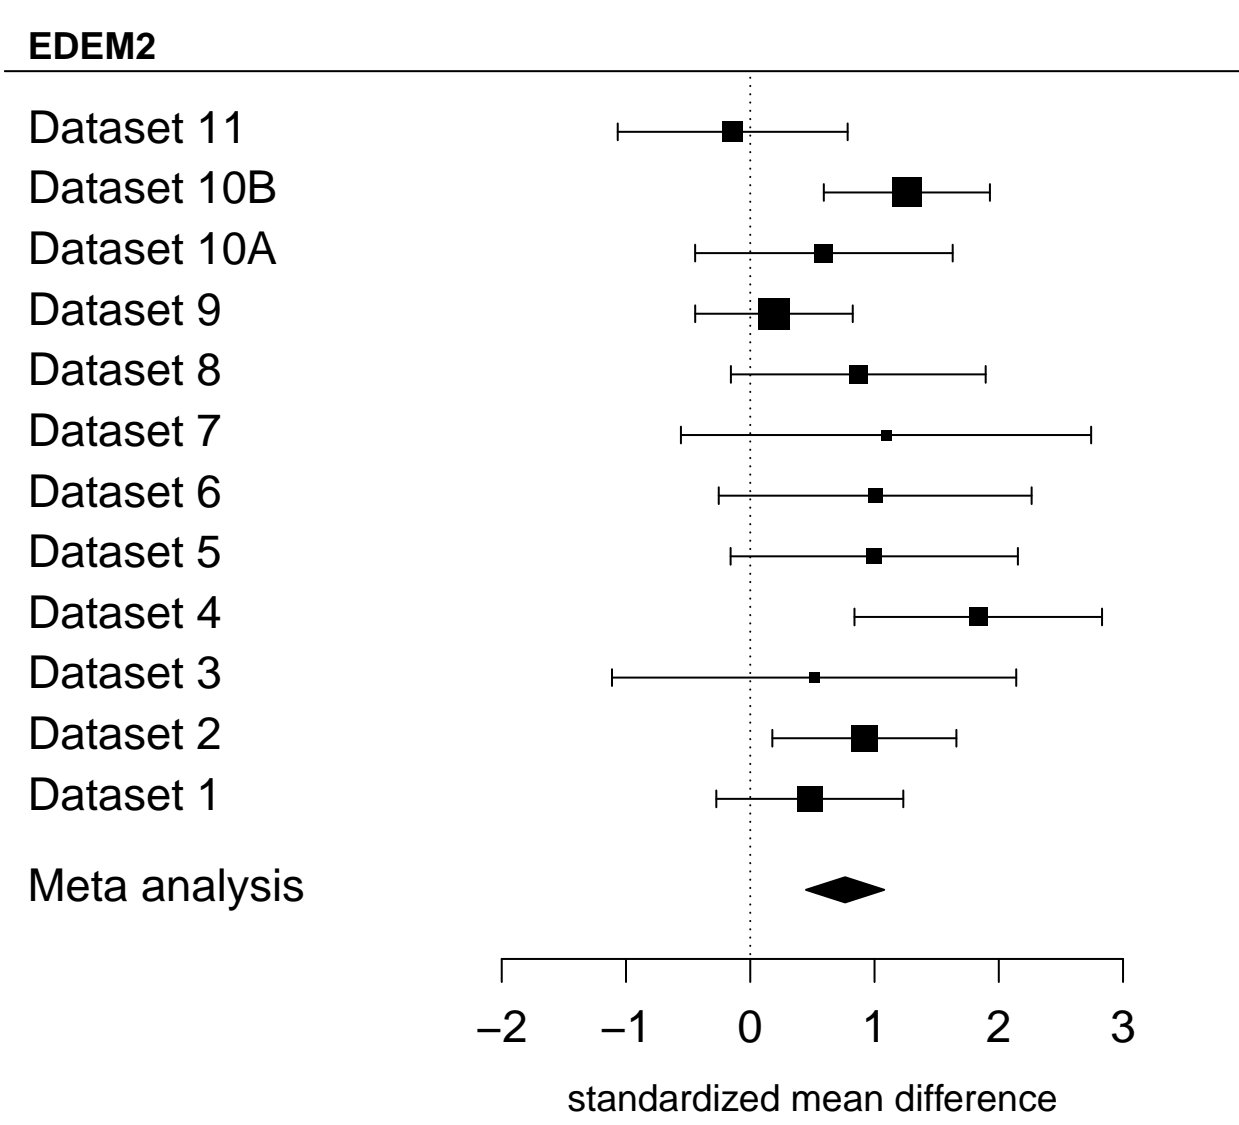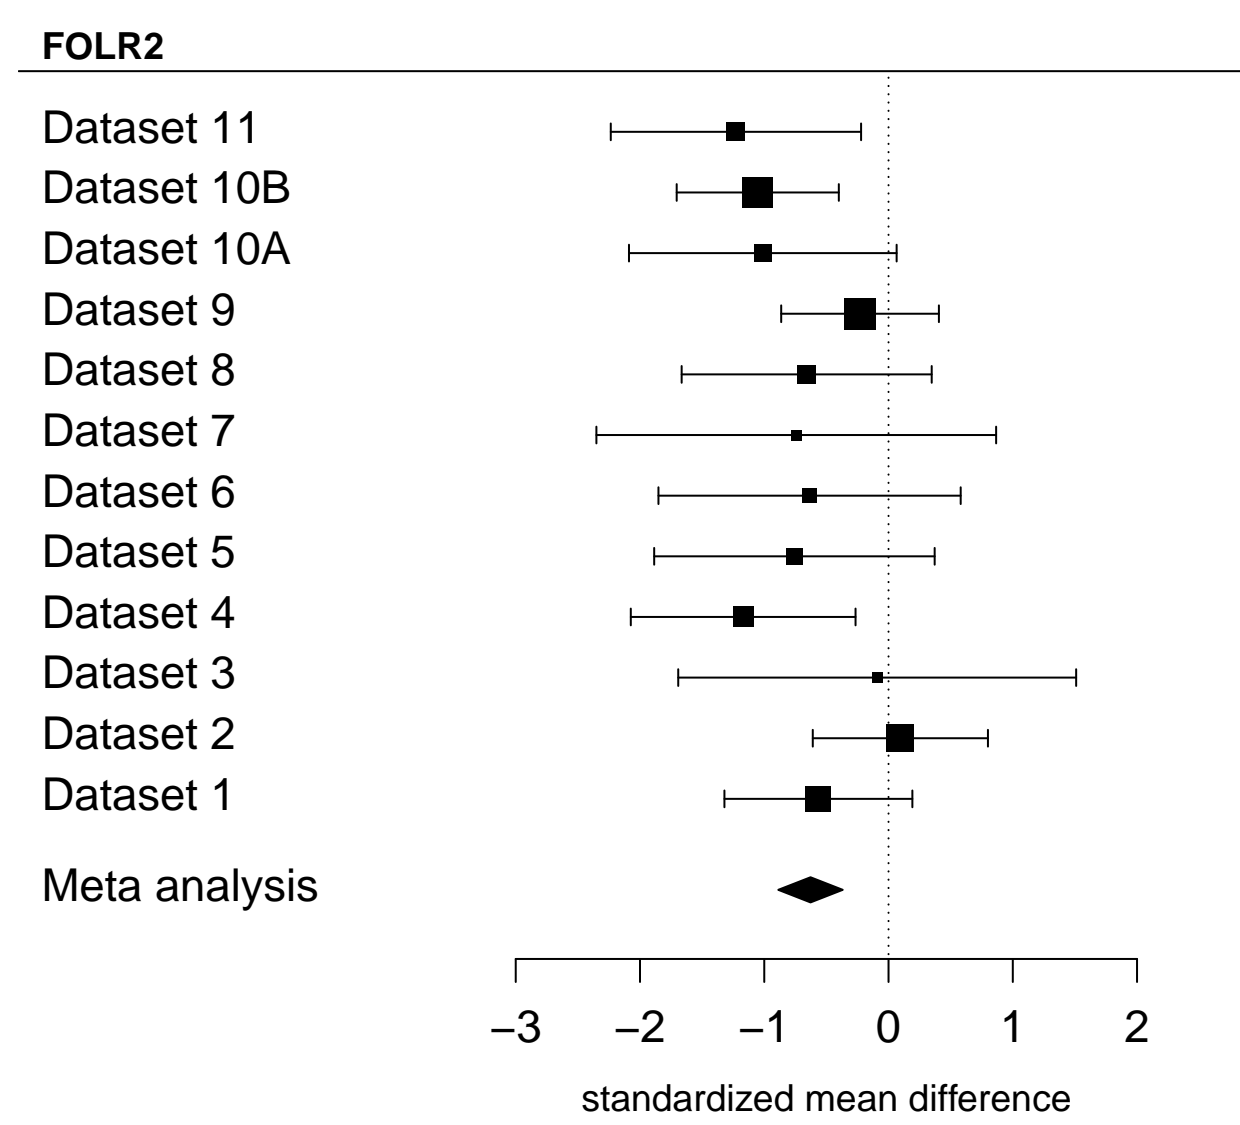

**ARID5B**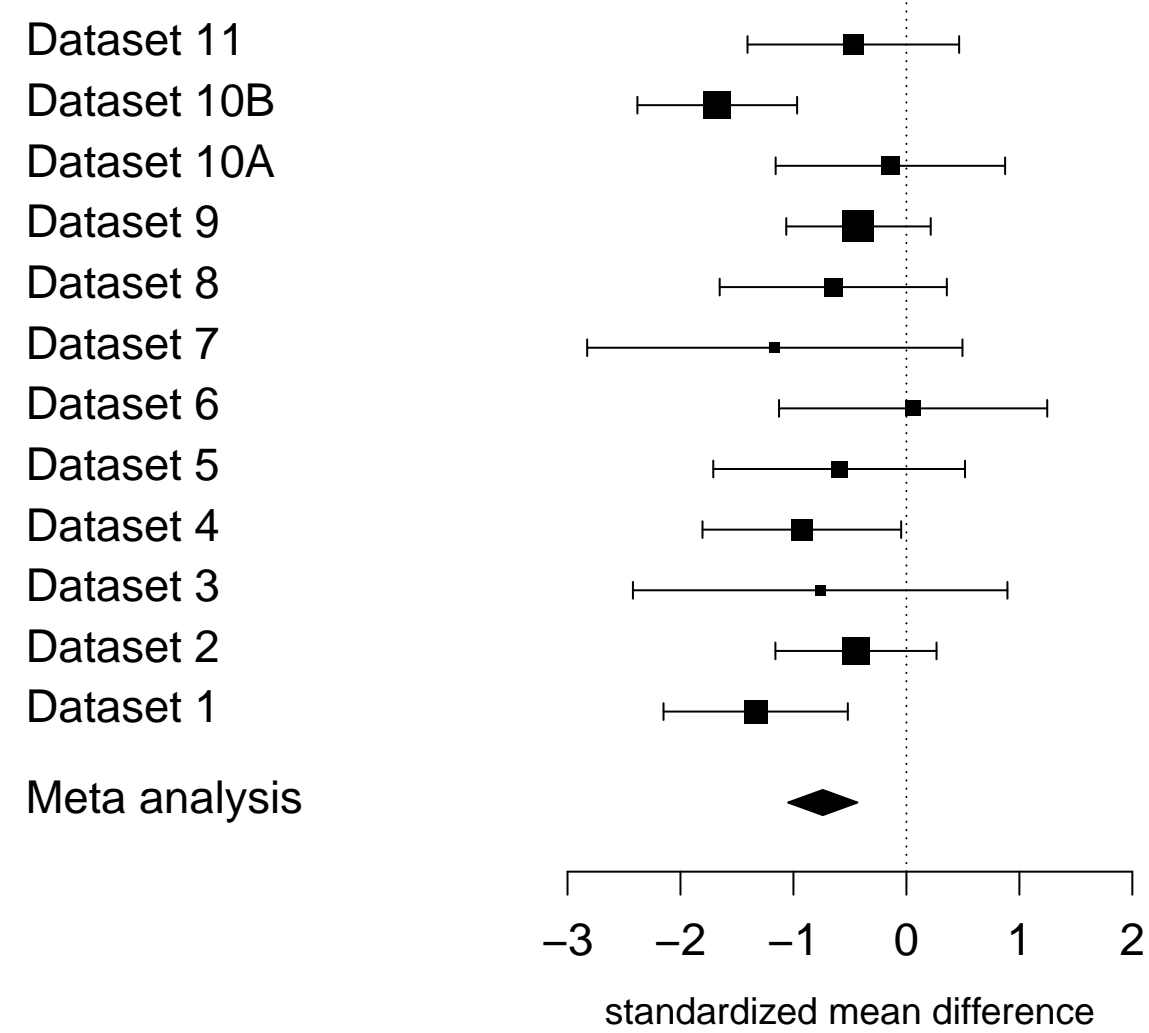**APPBP2**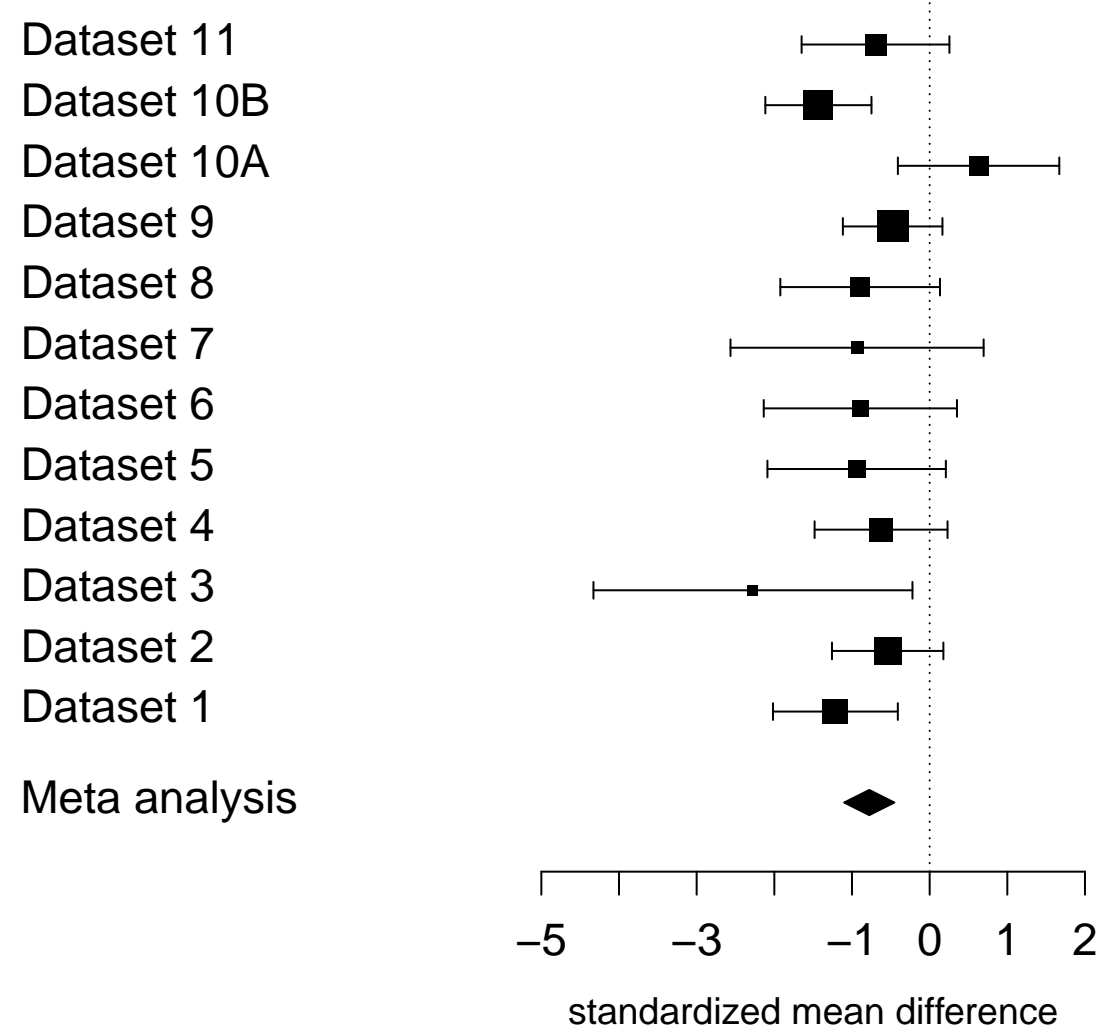**AQP1**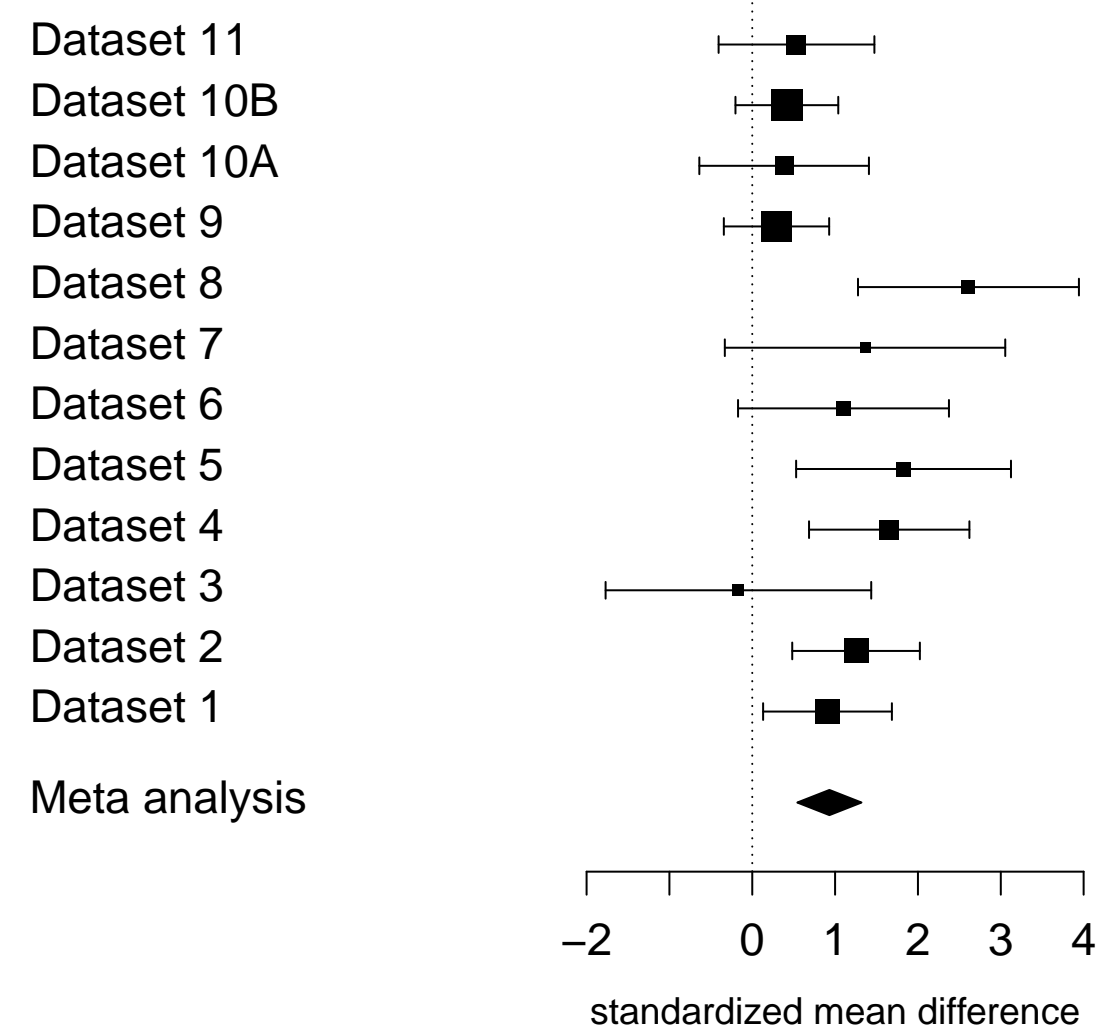**MTX1**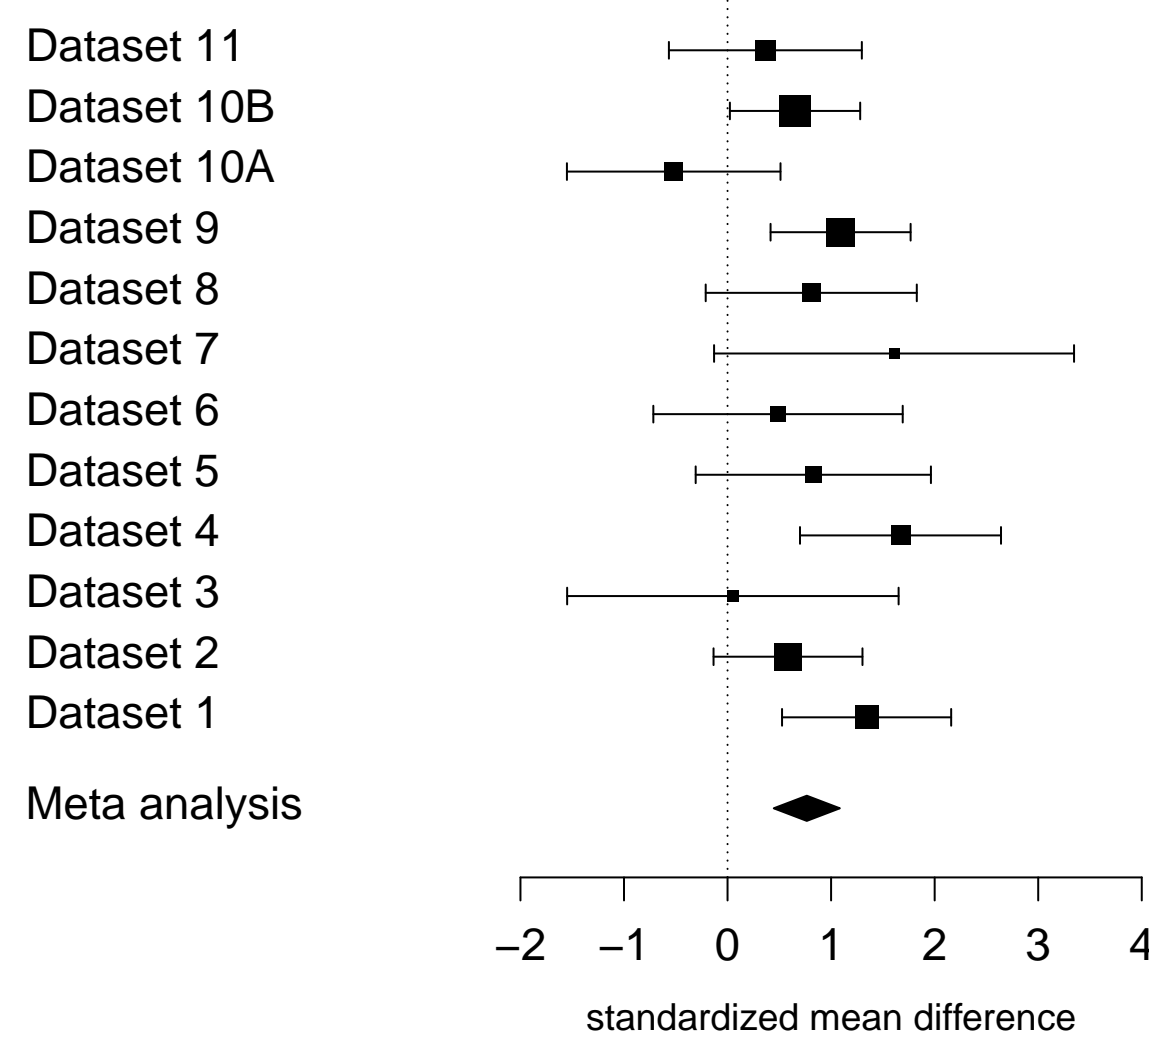**SPP1**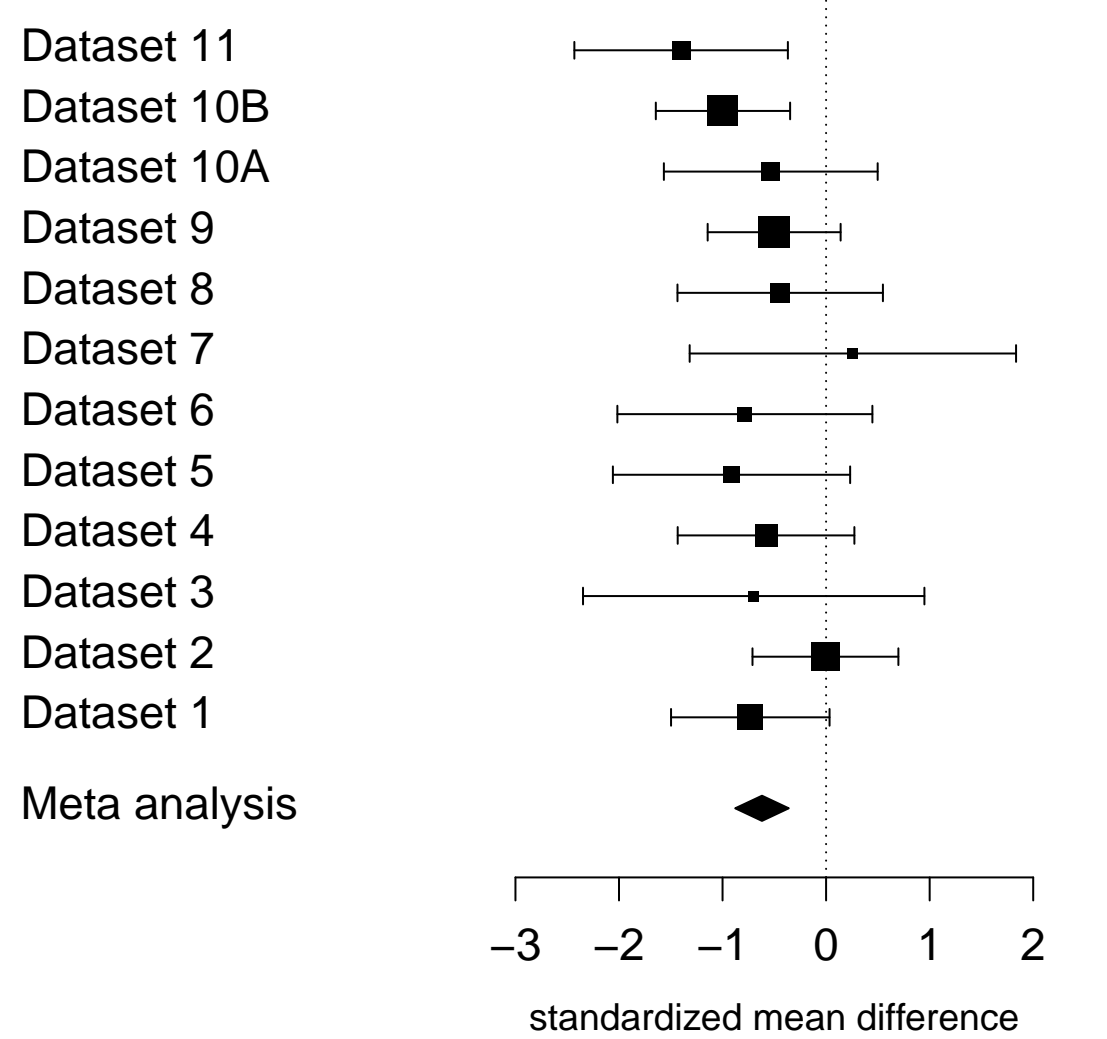**PLEC**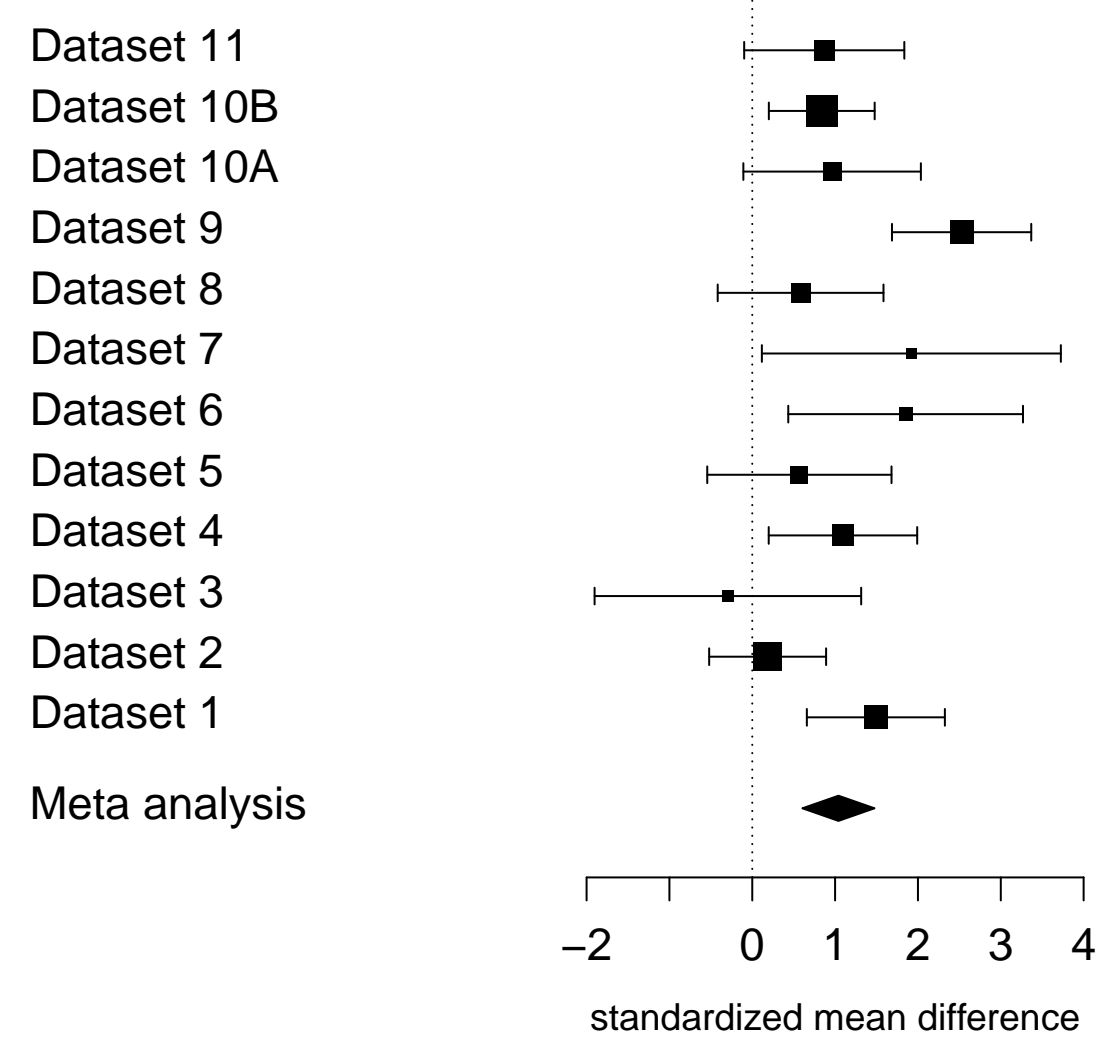**HMOX1**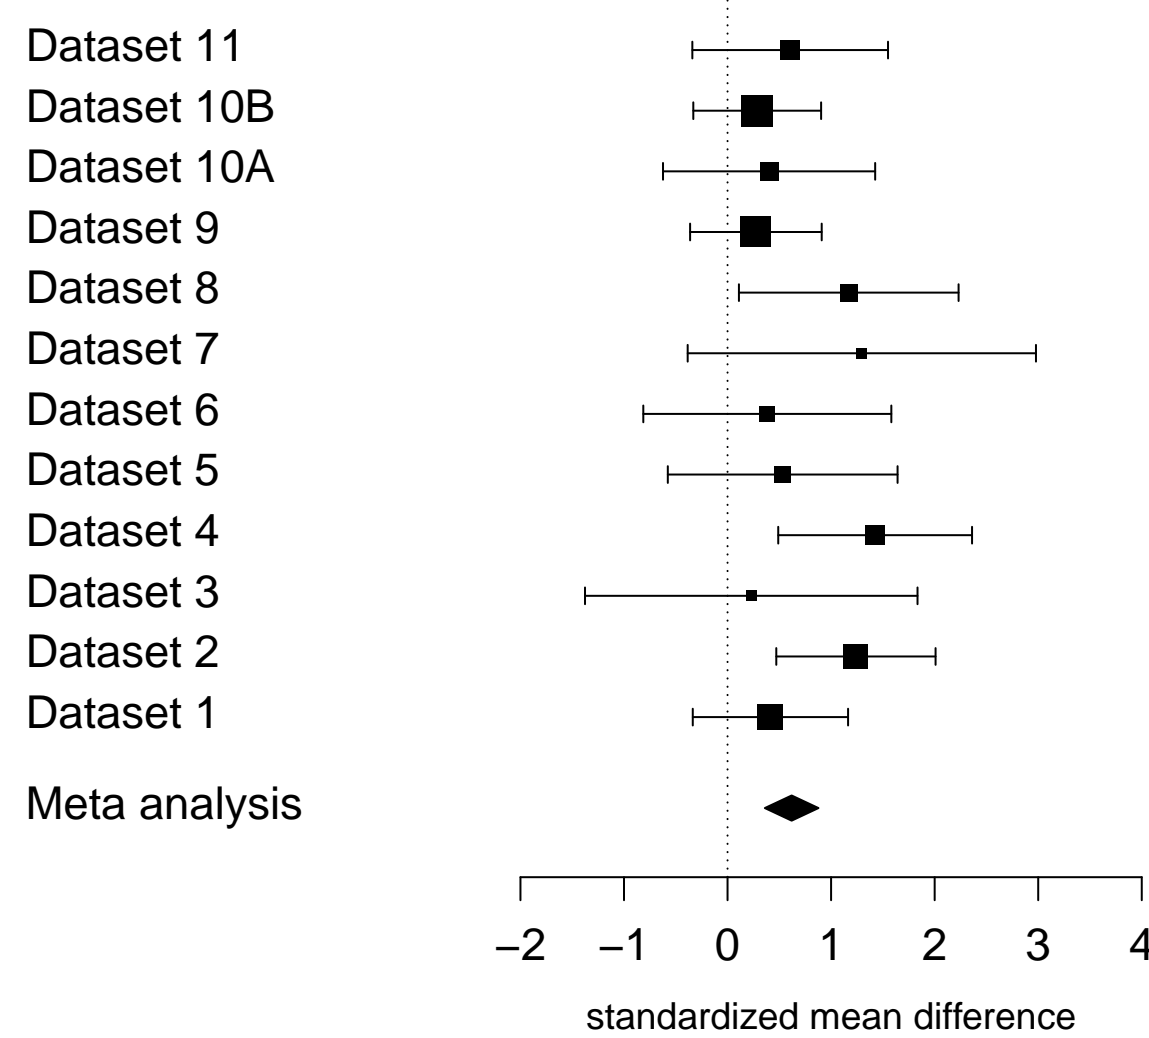**MAP4K3**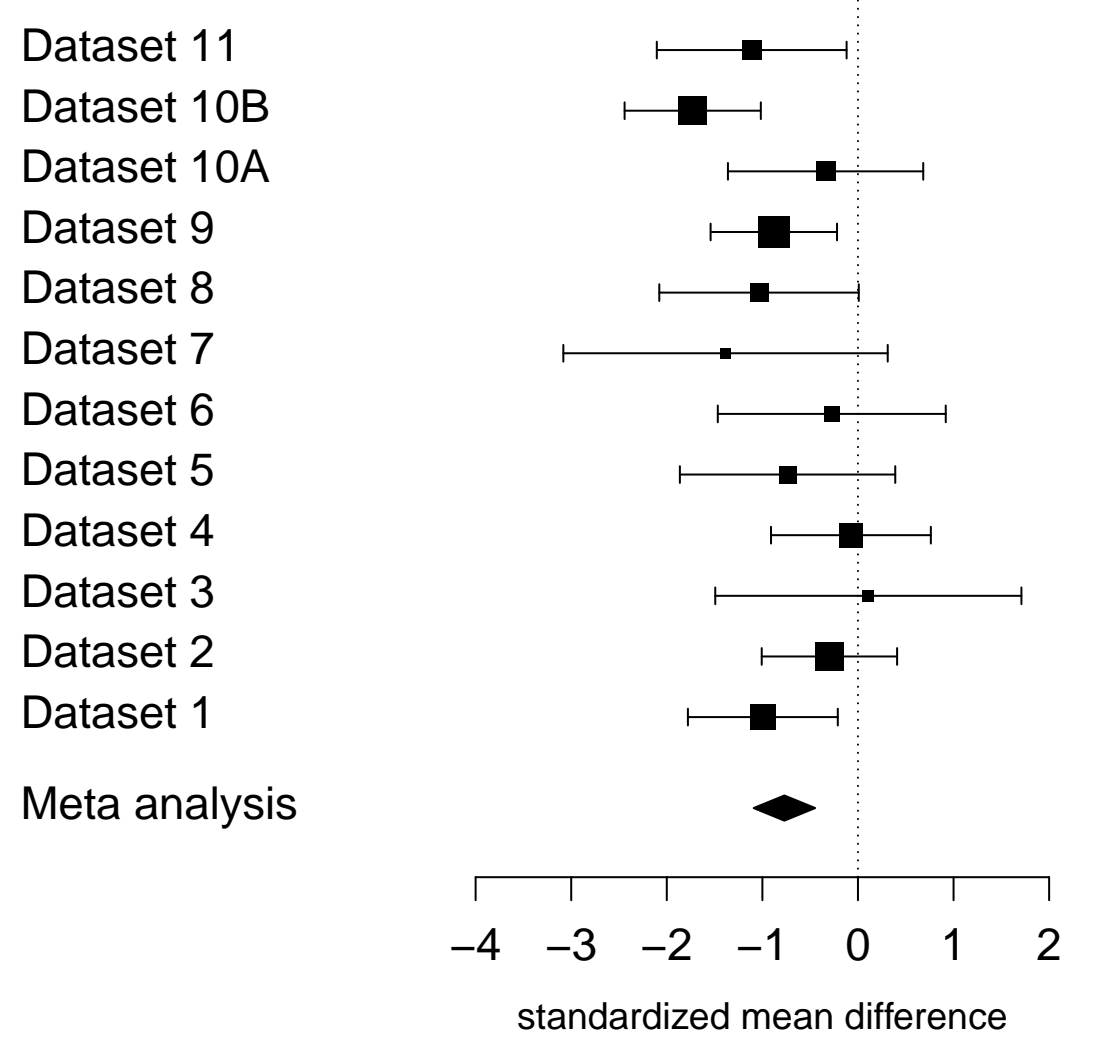**HMGB3**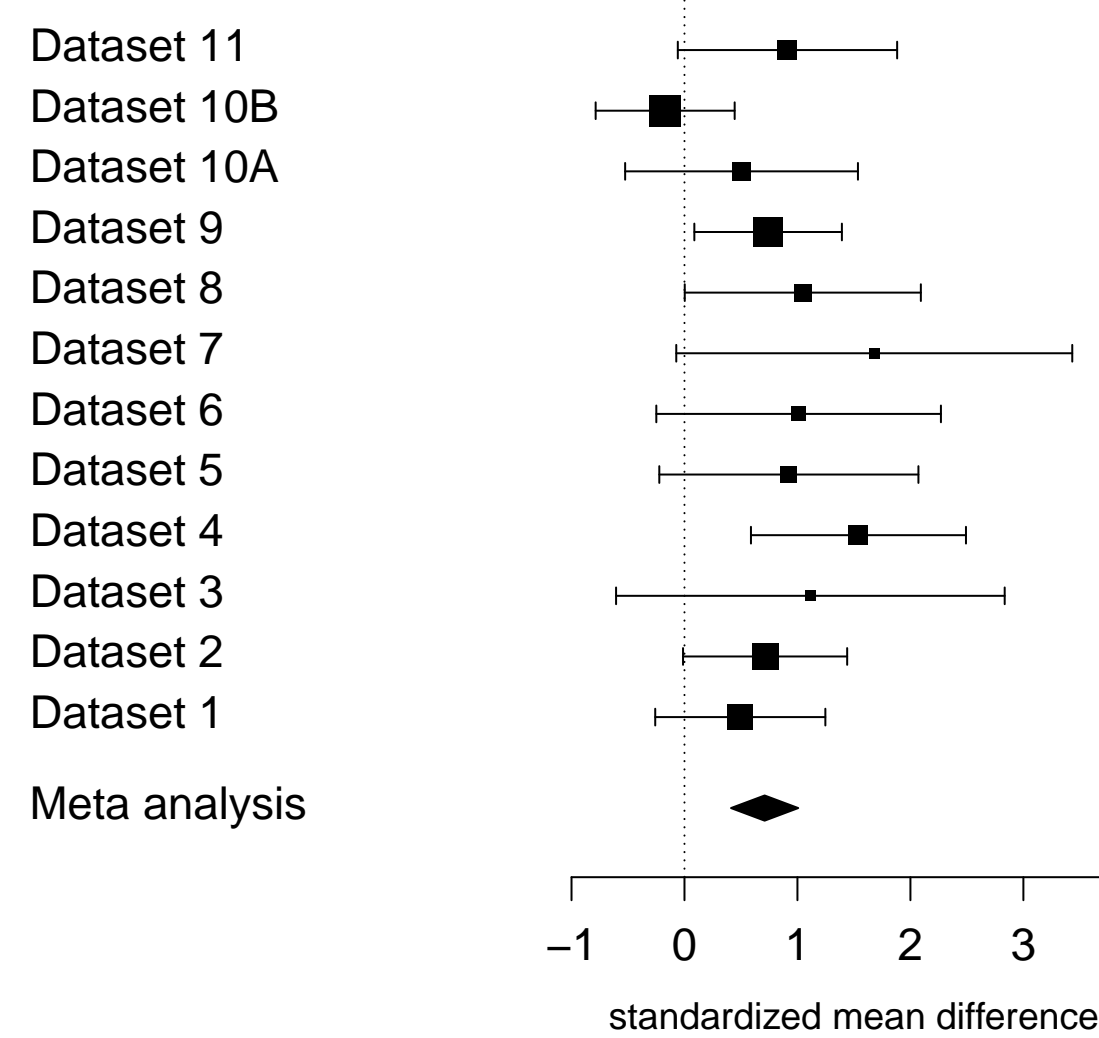**SH3BGRL**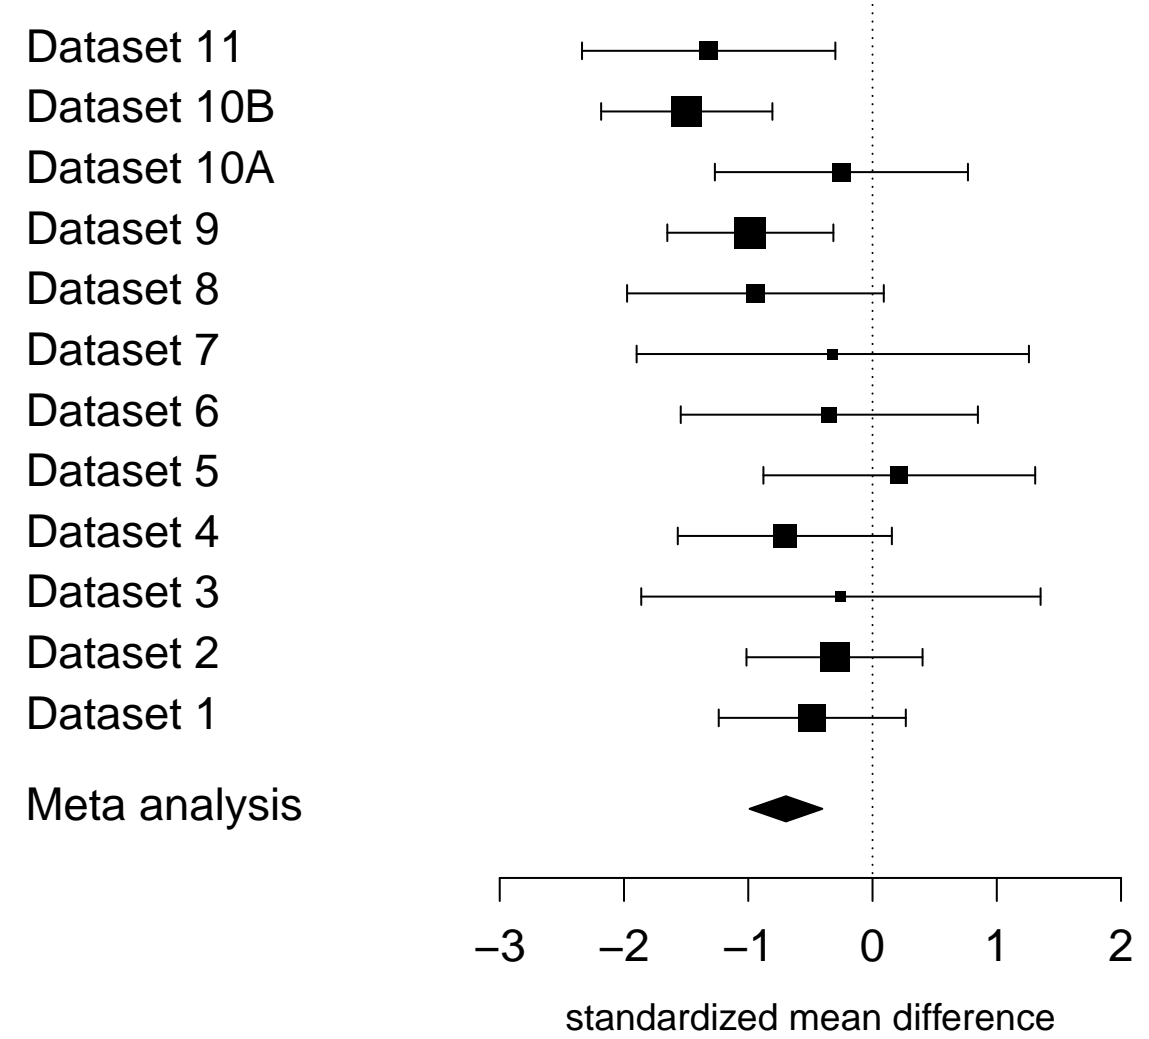**CXCL14**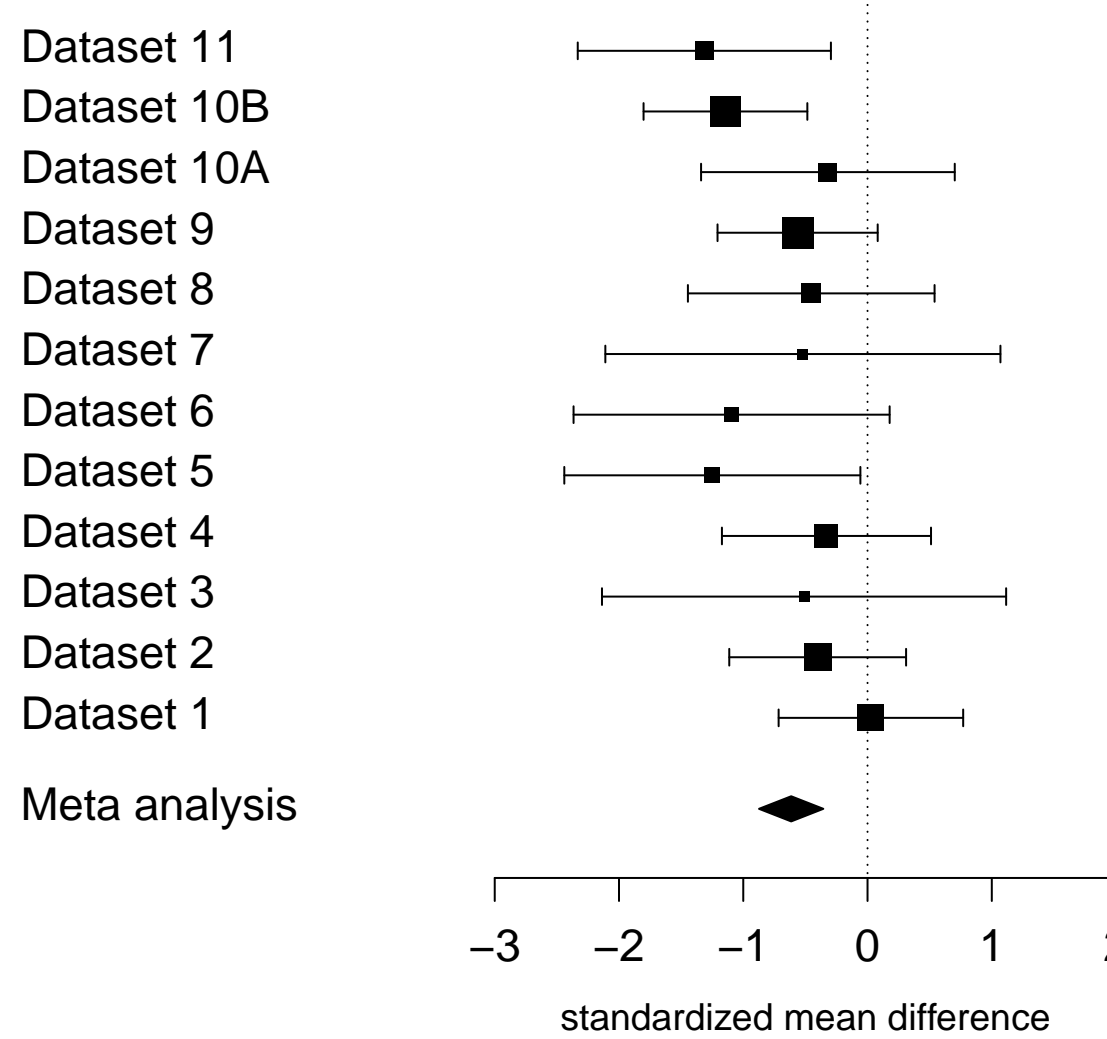**EPHB6**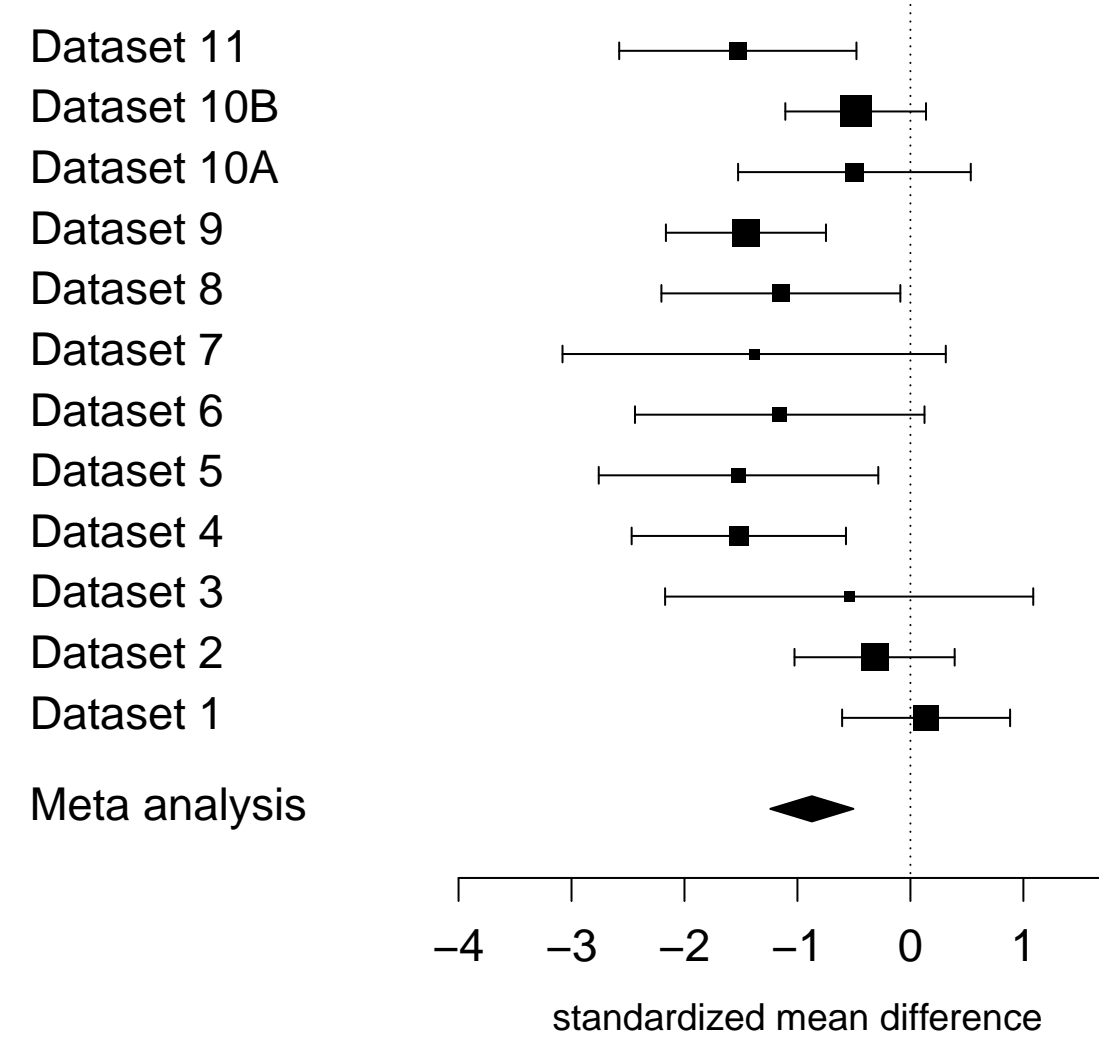

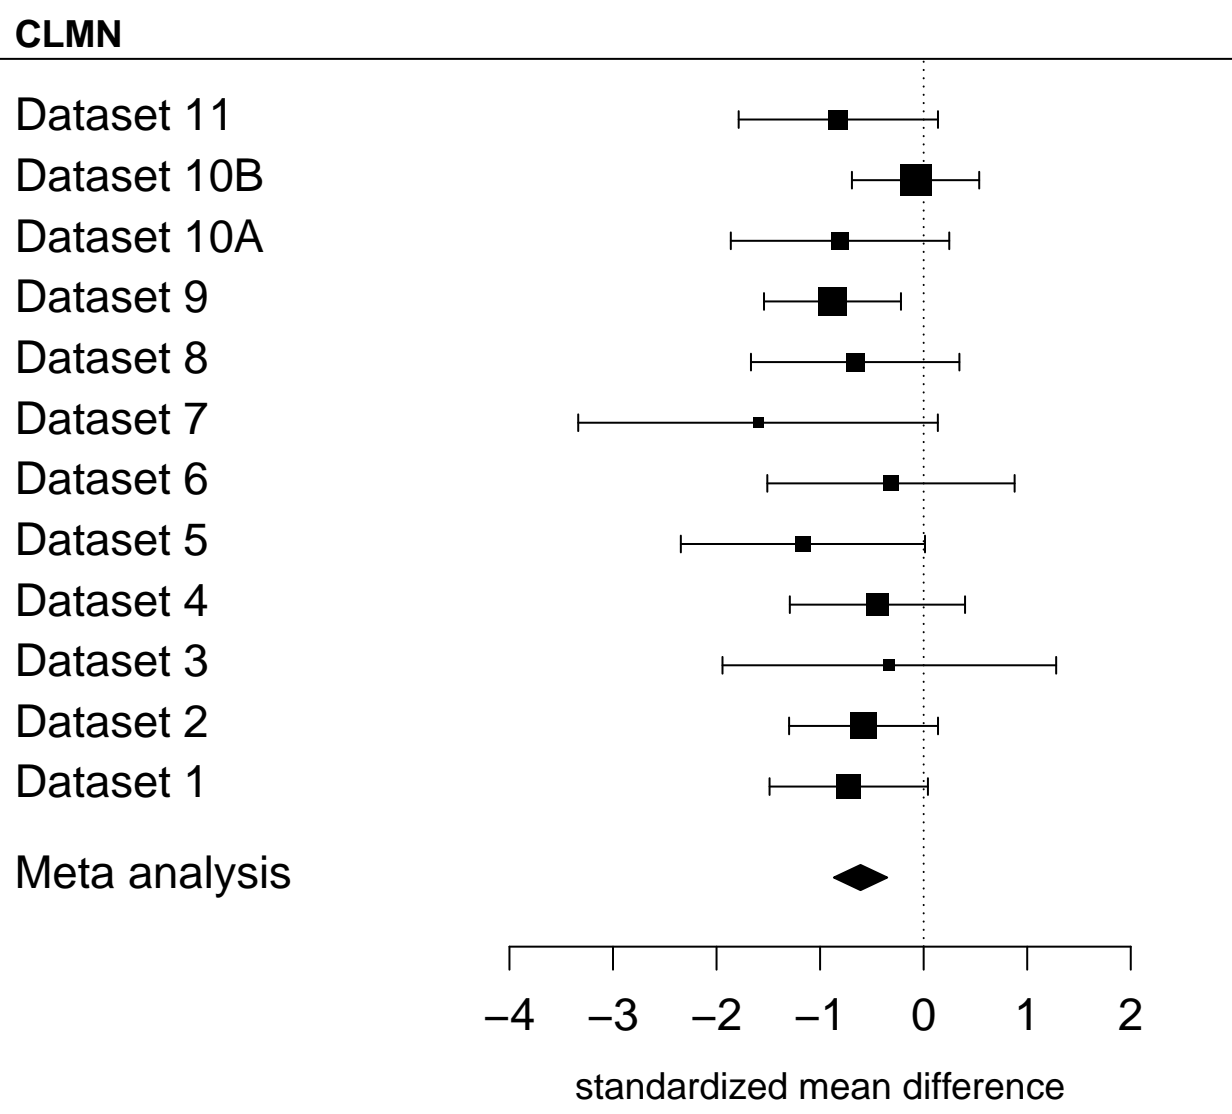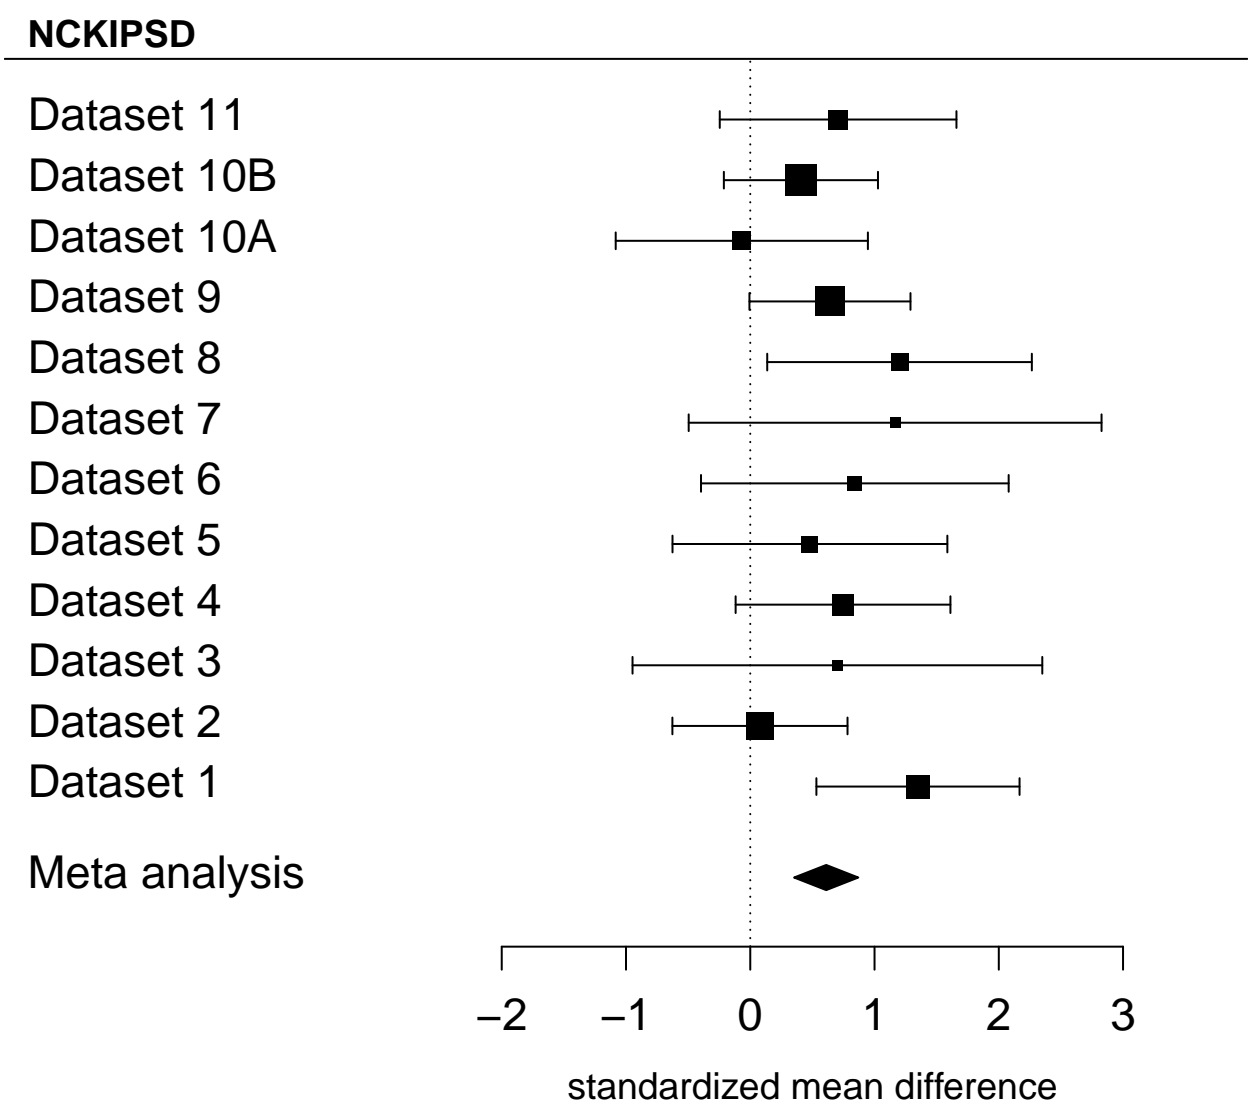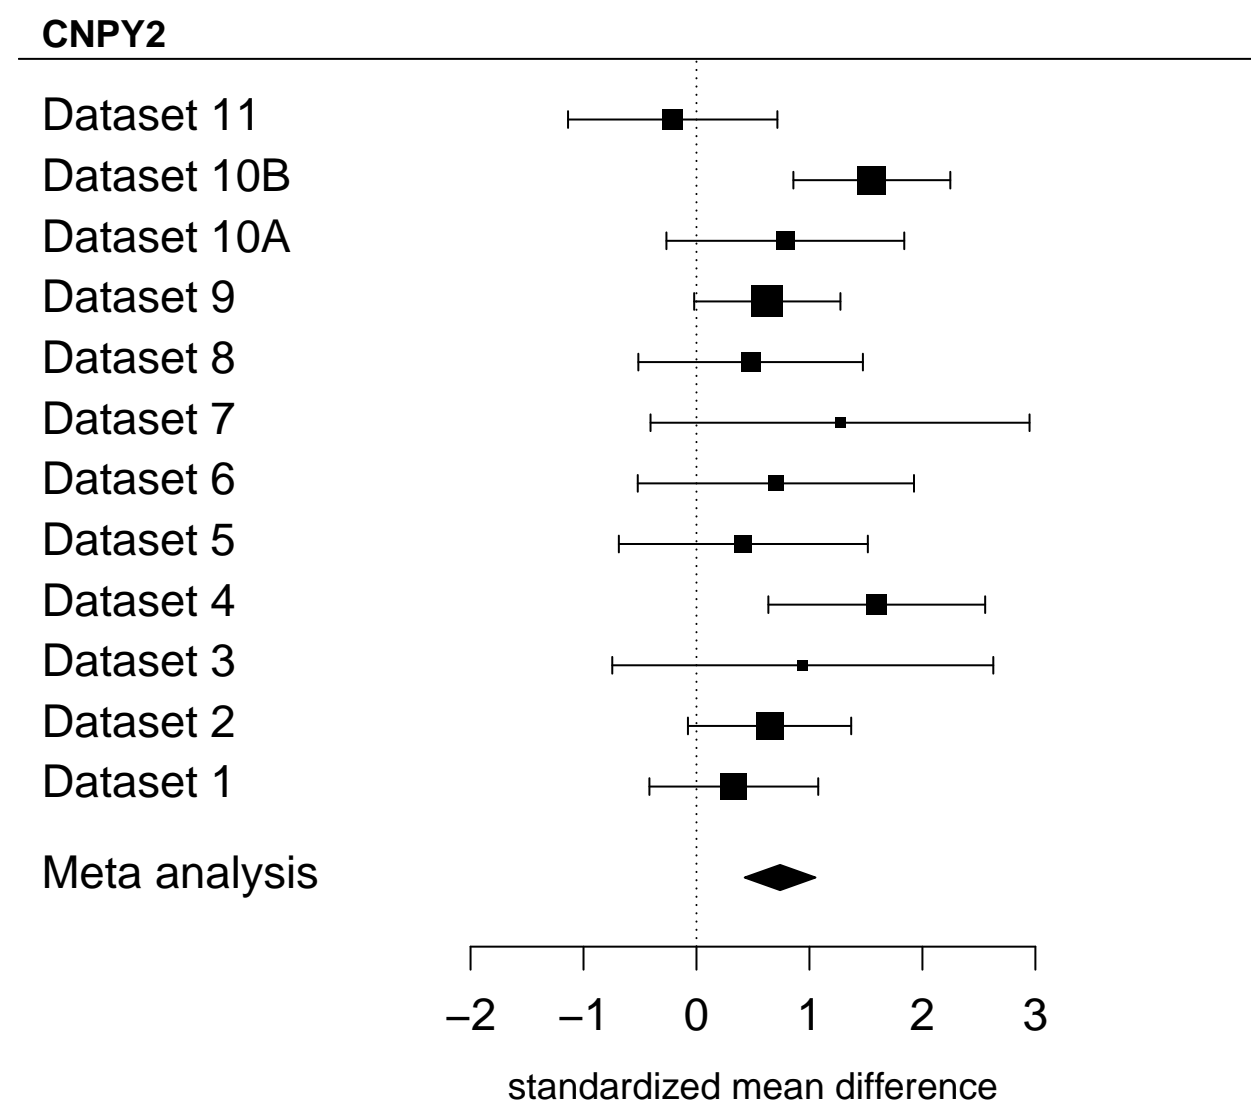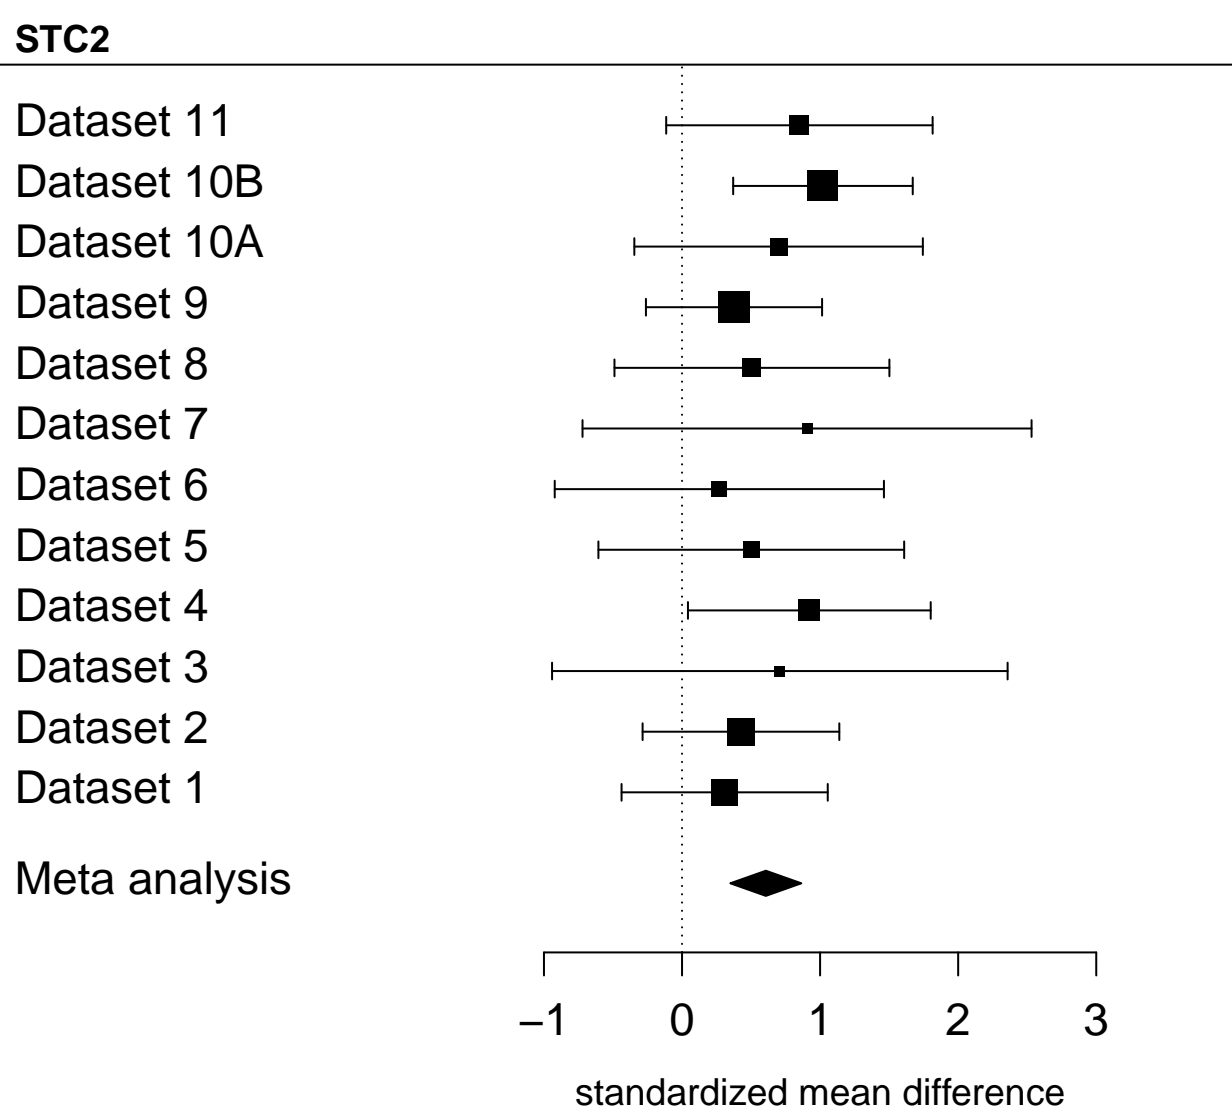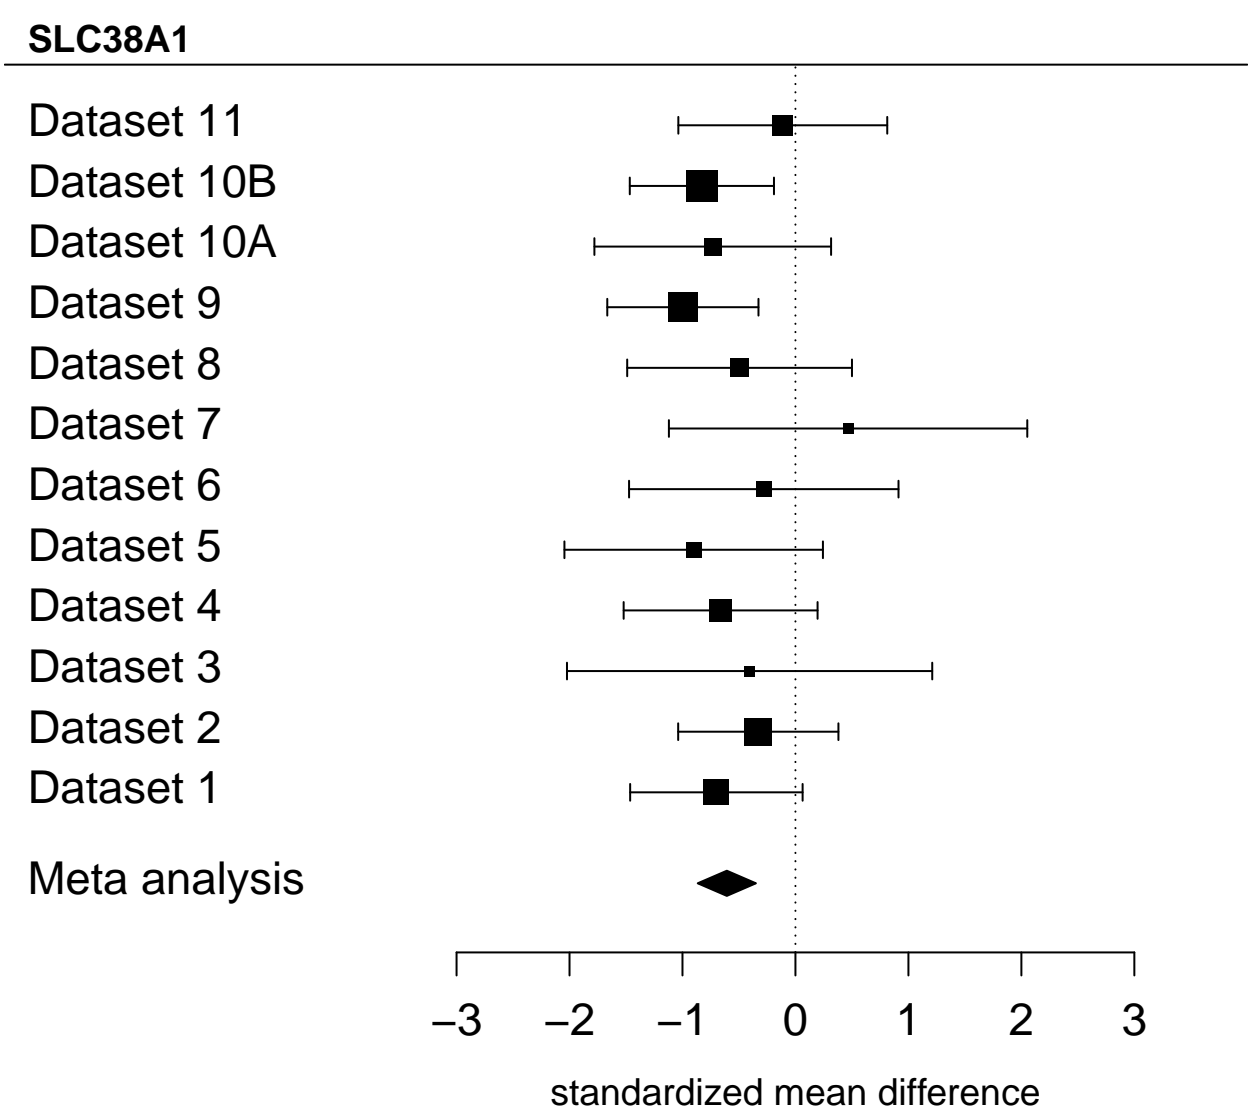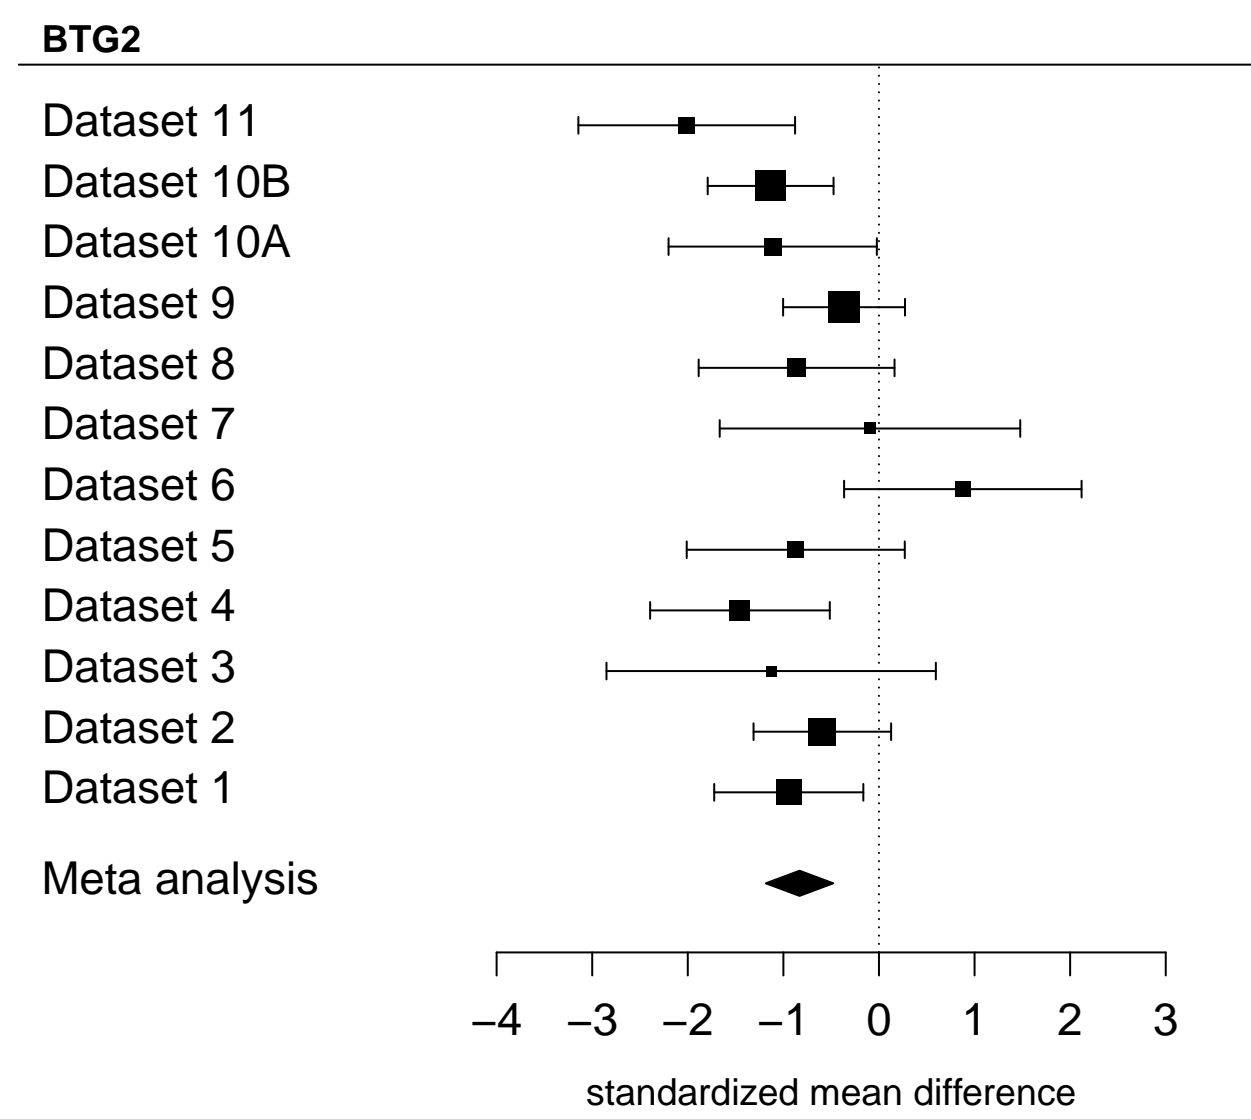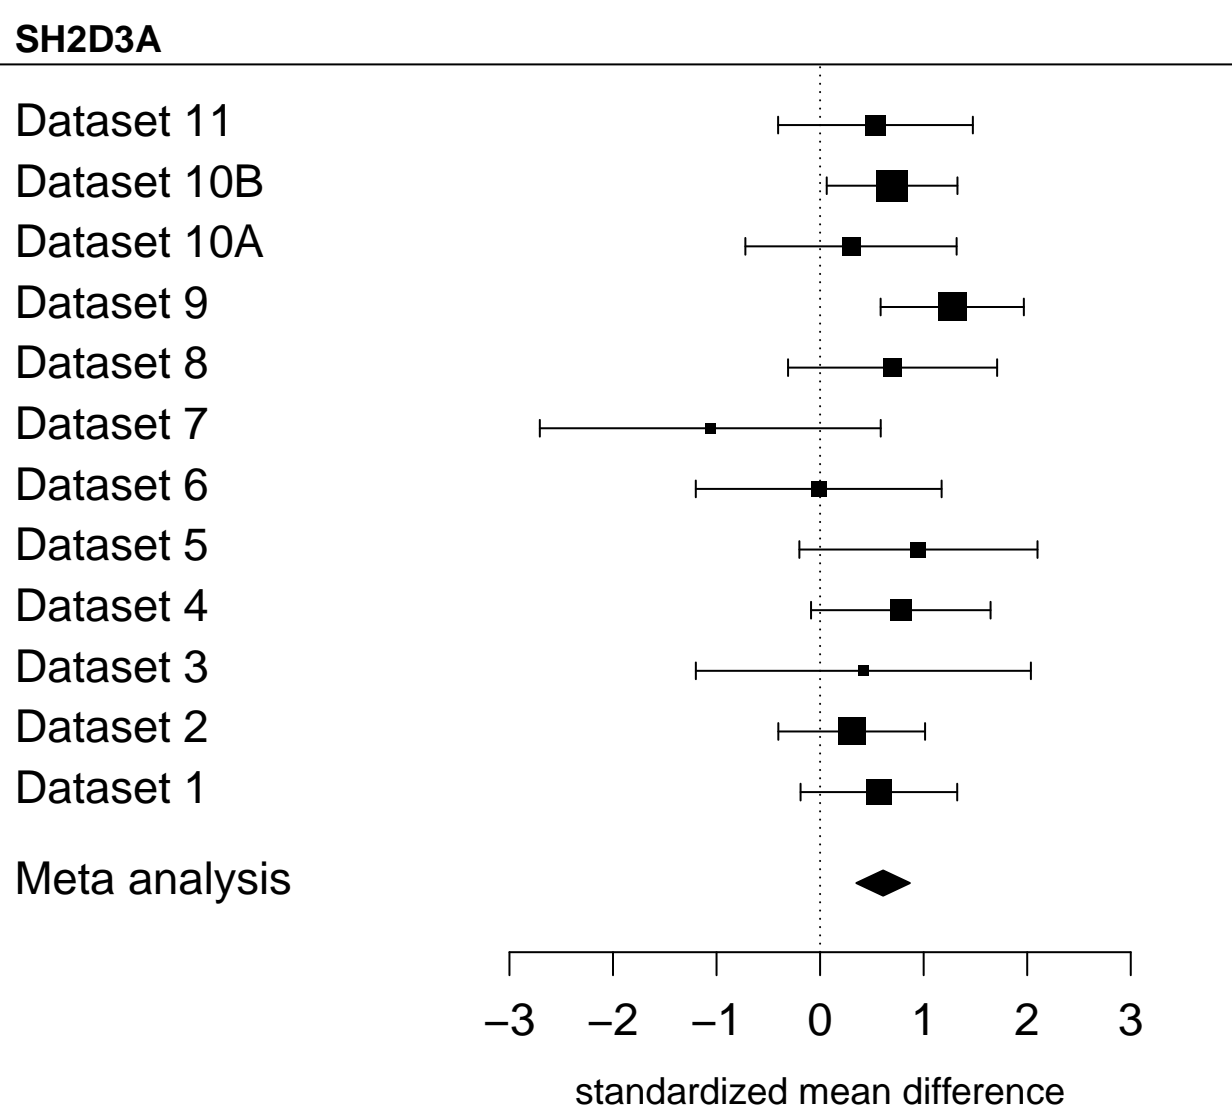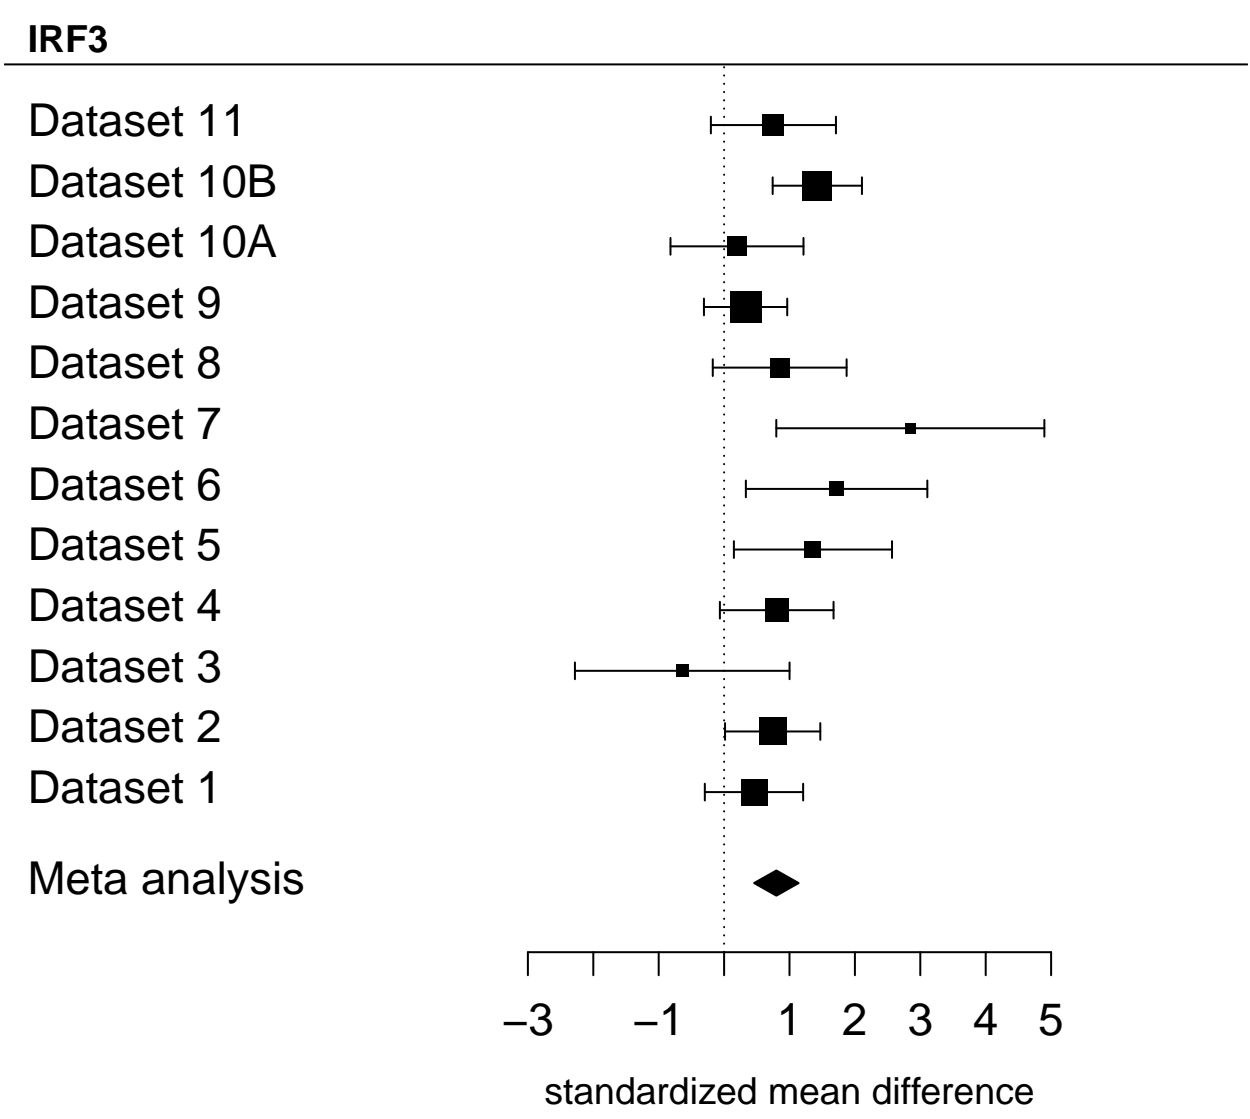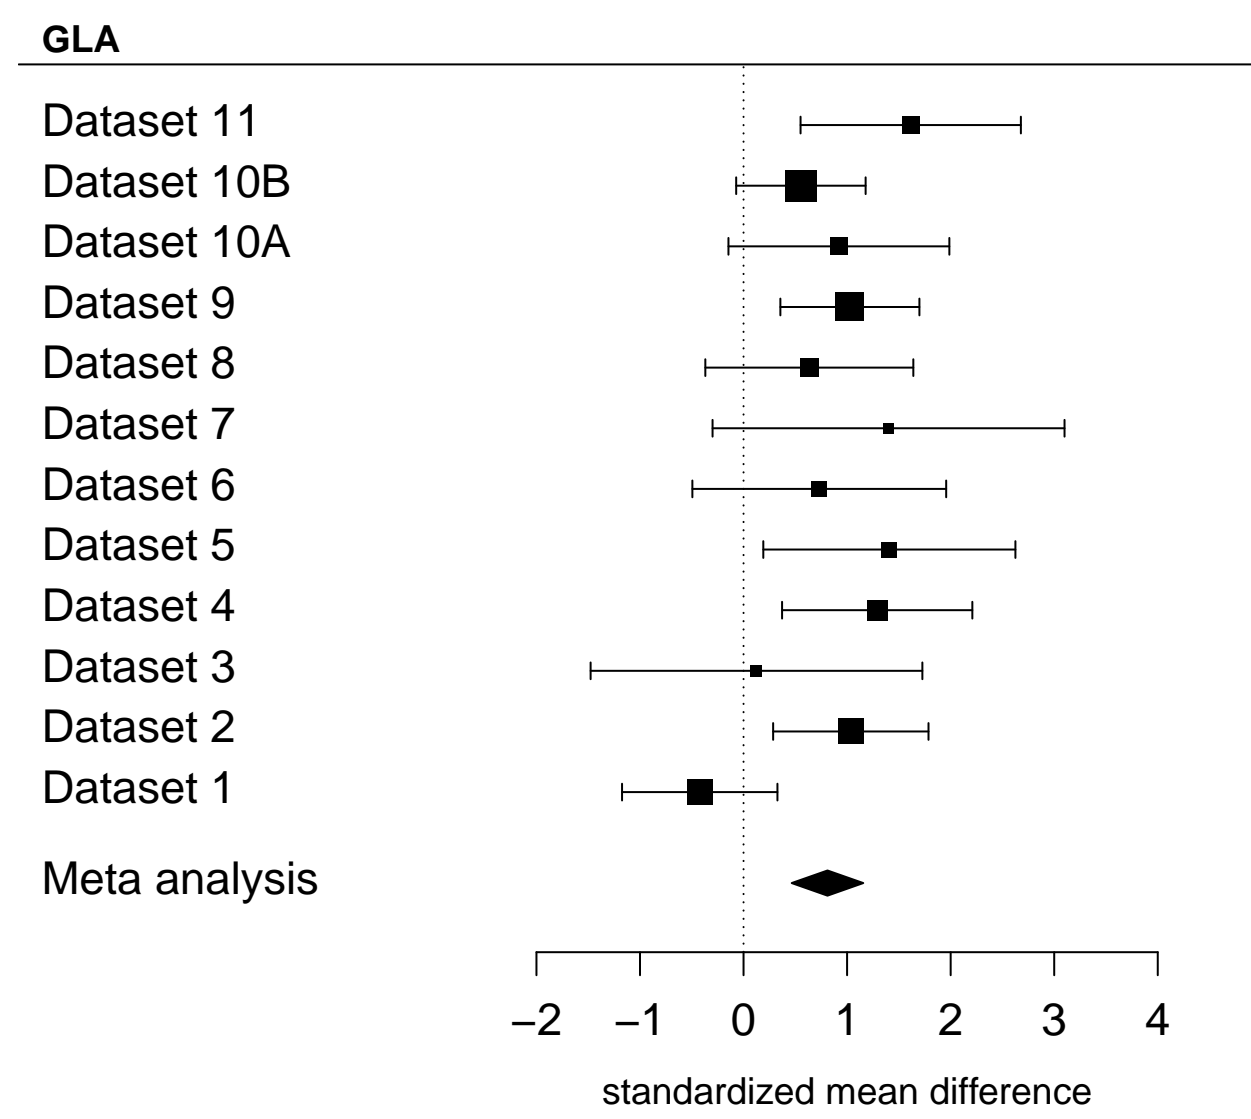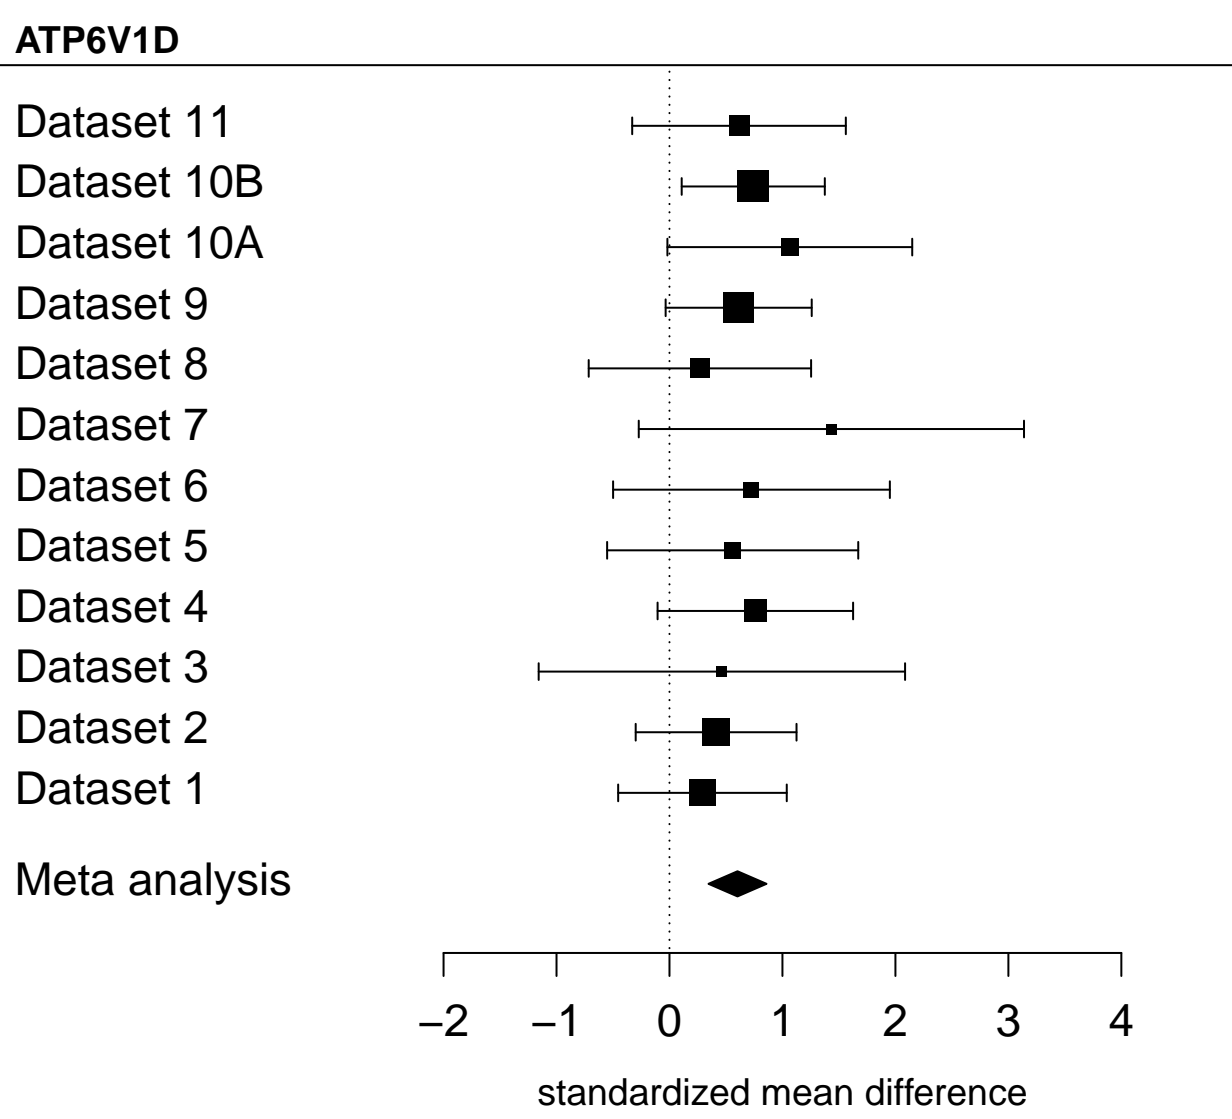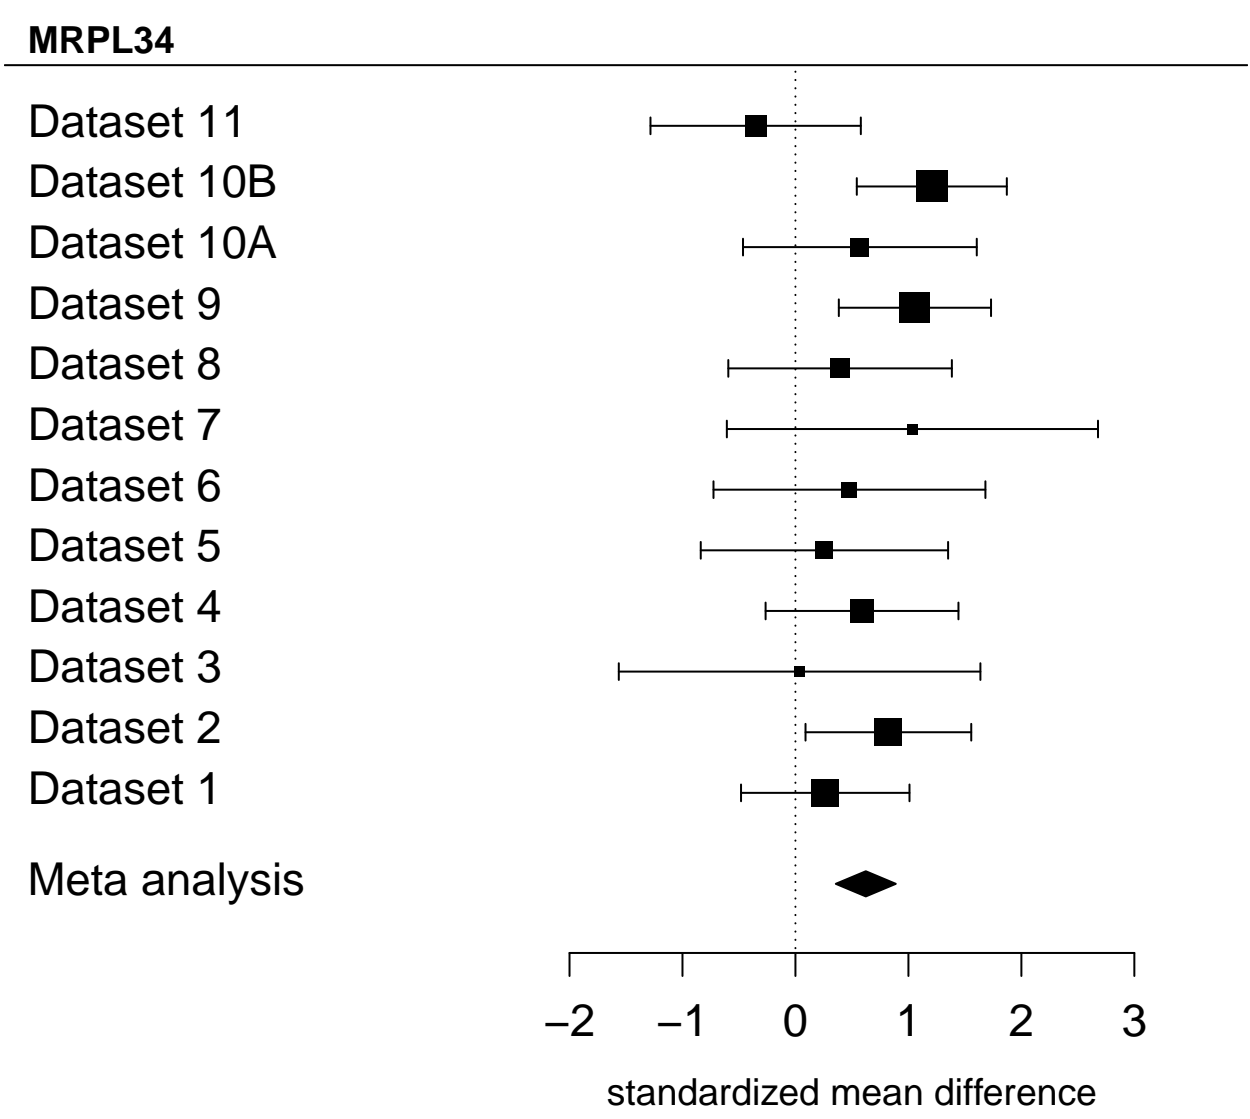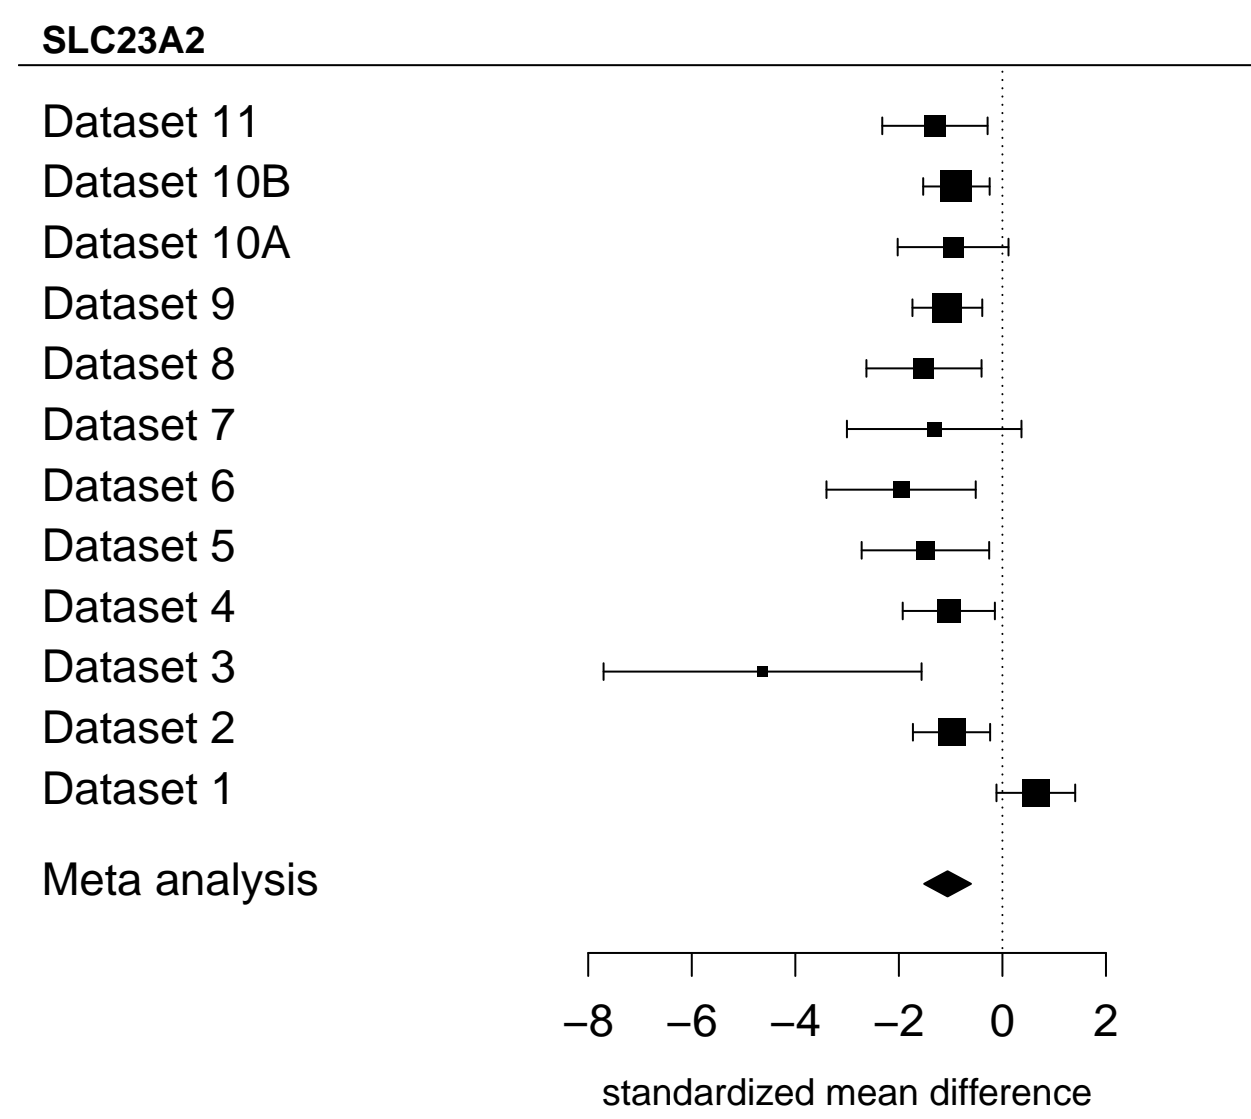

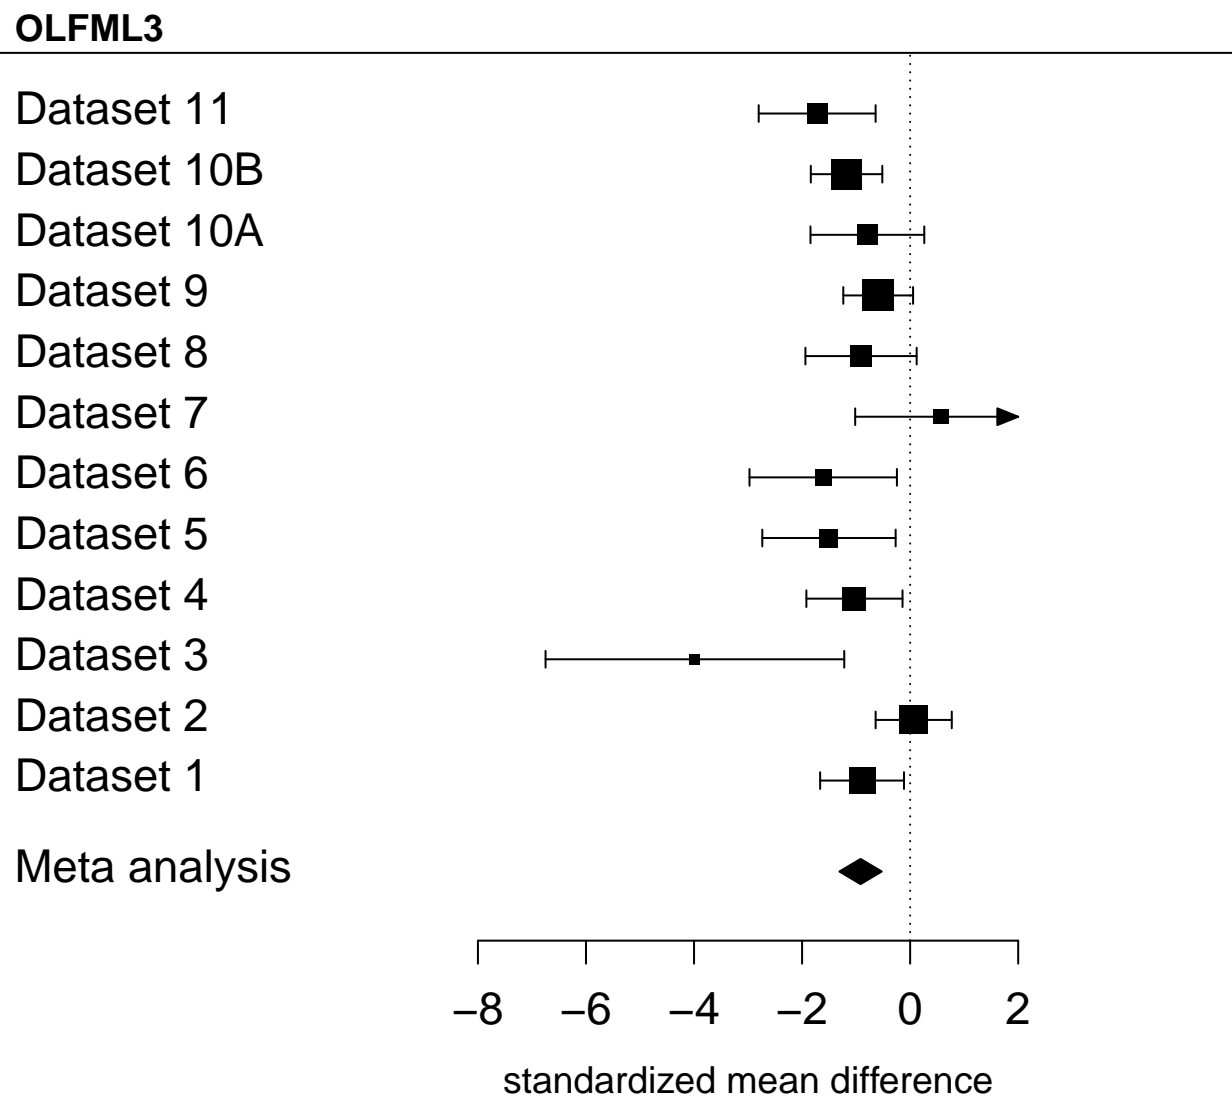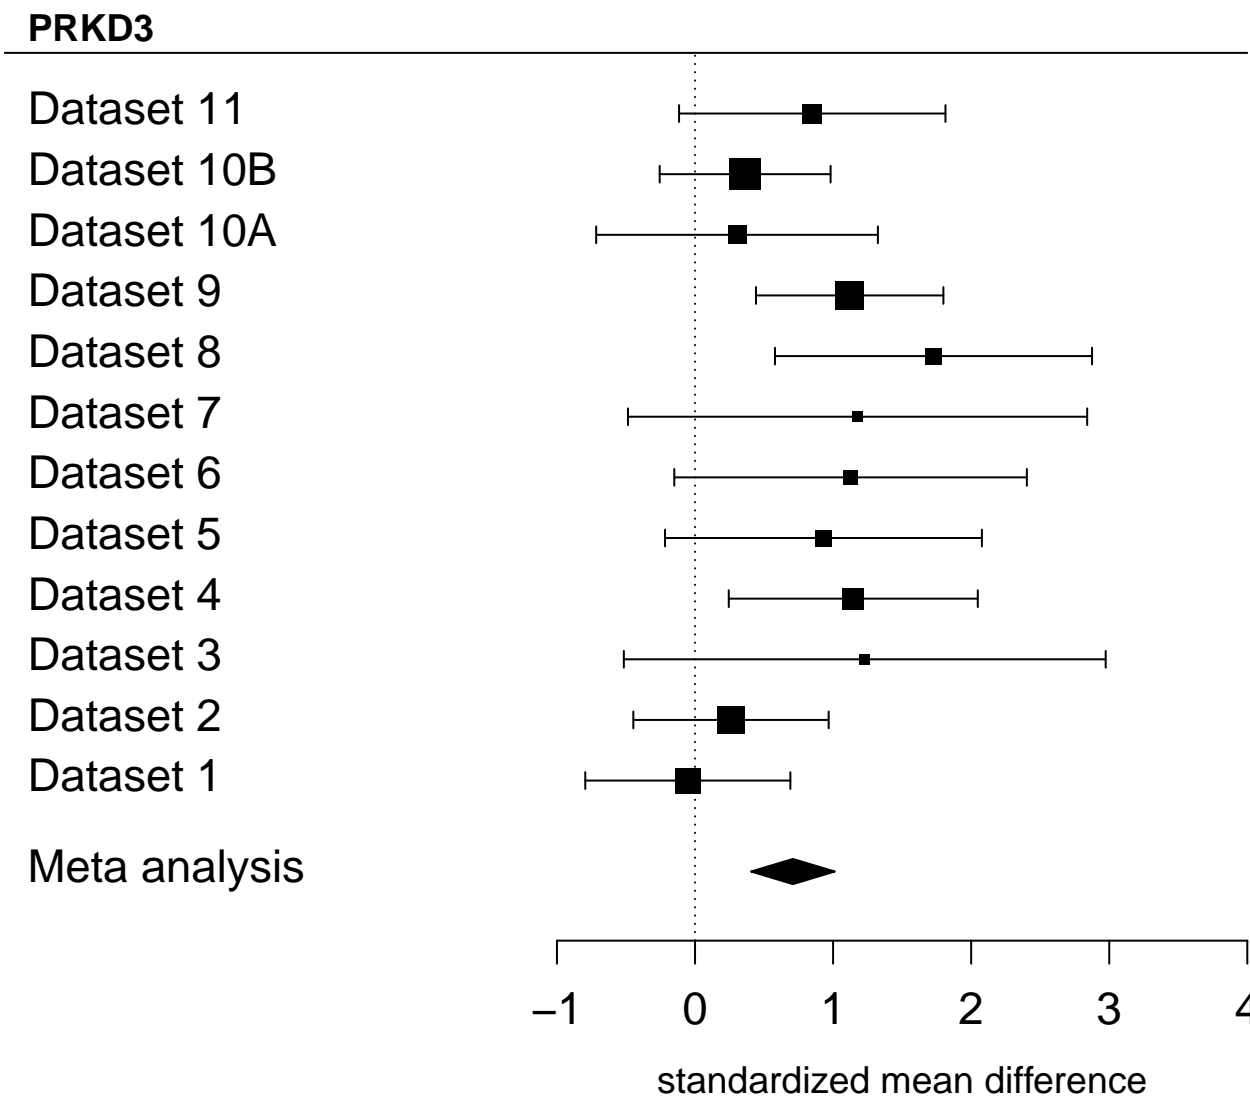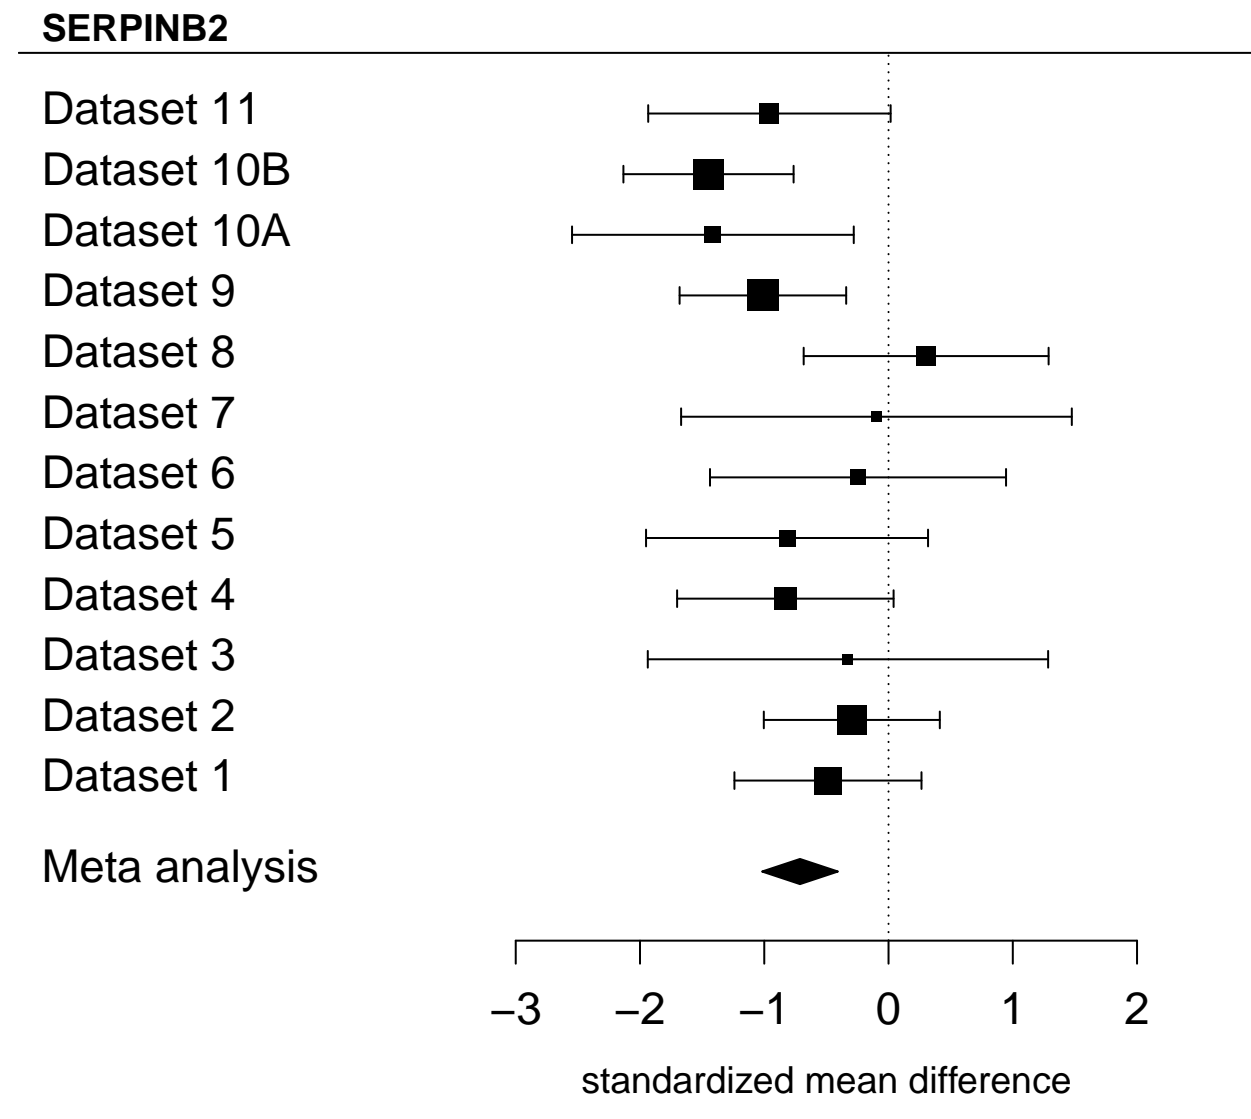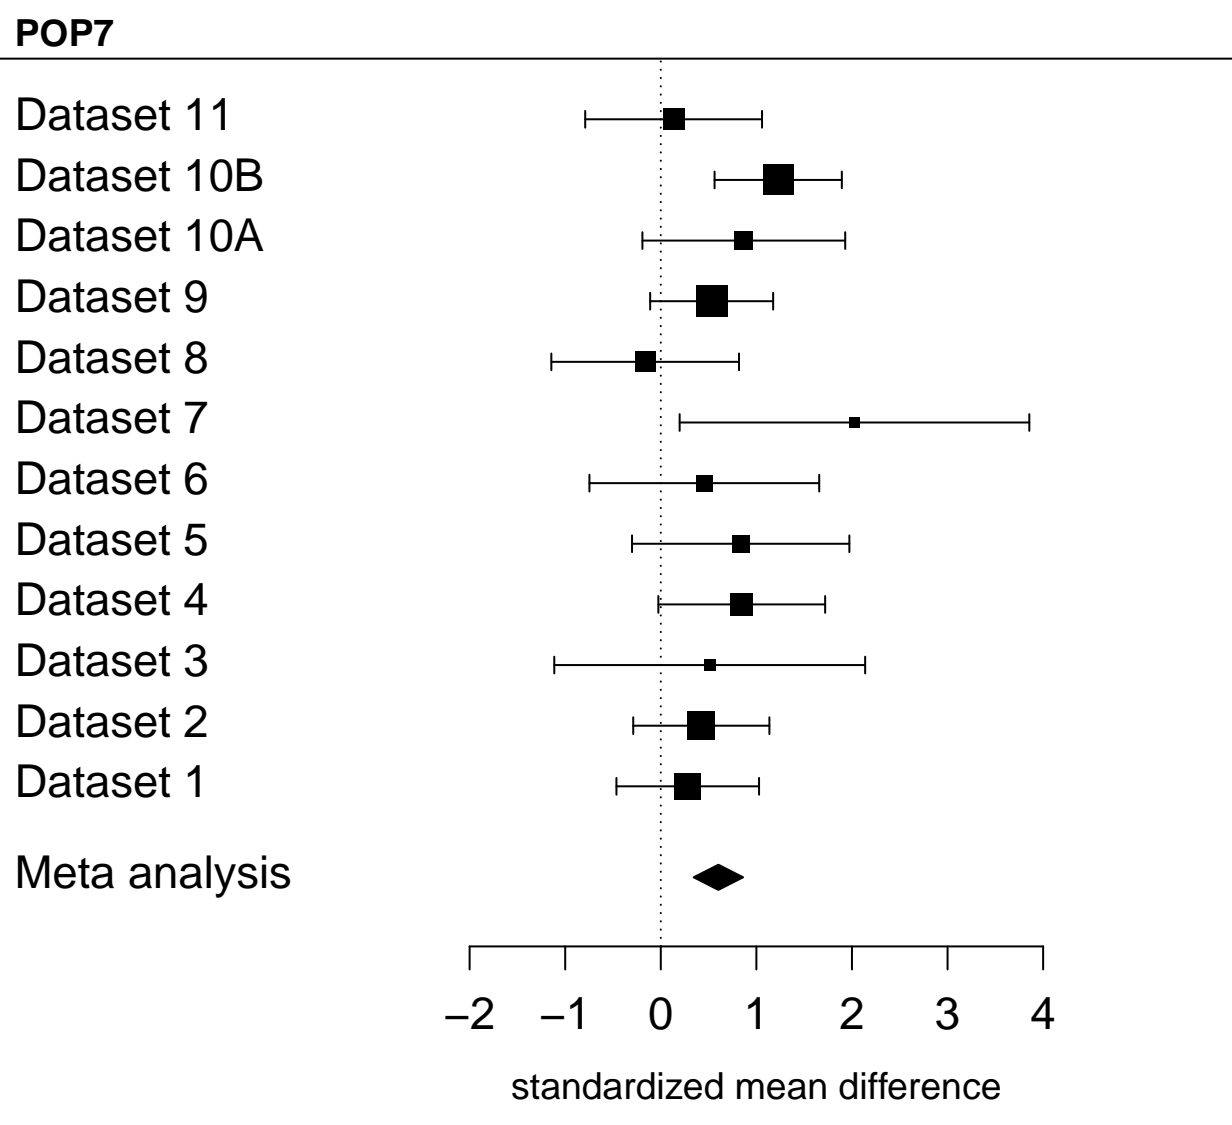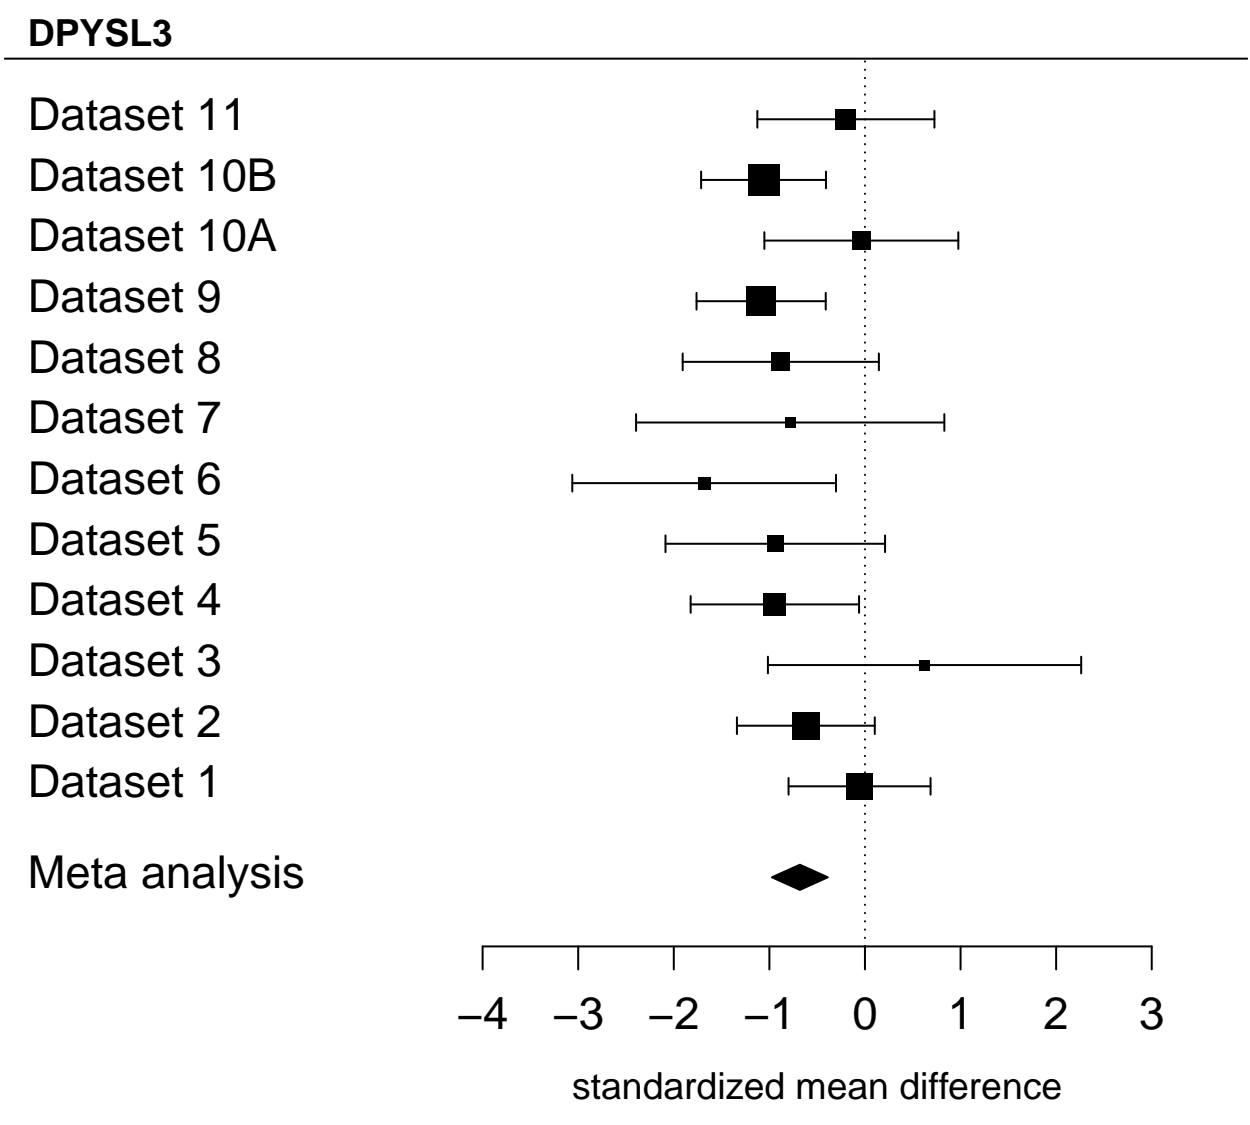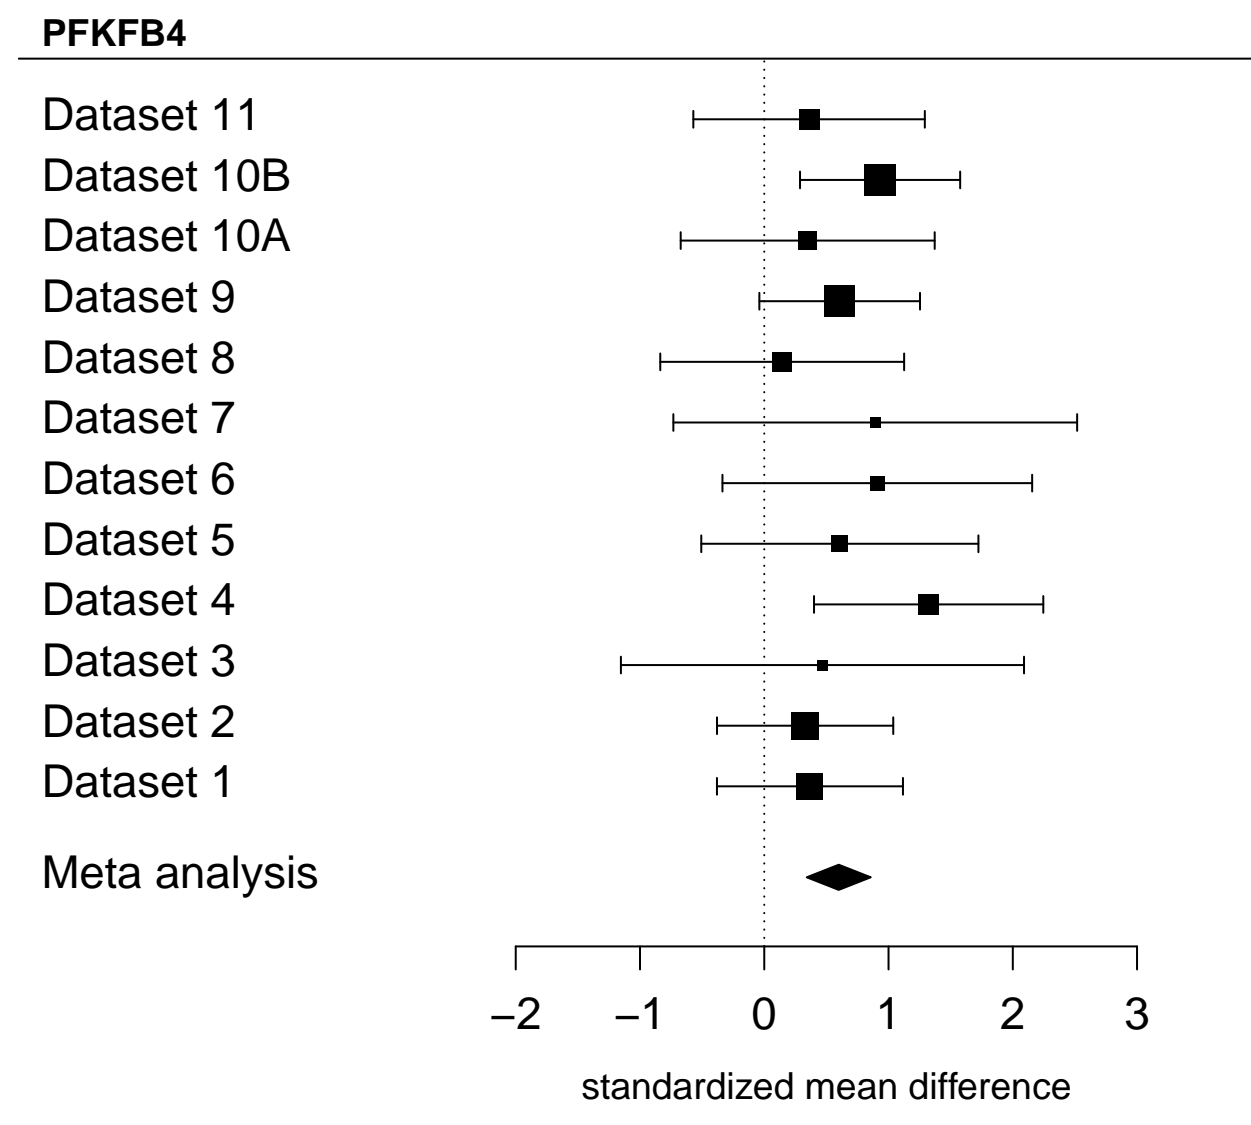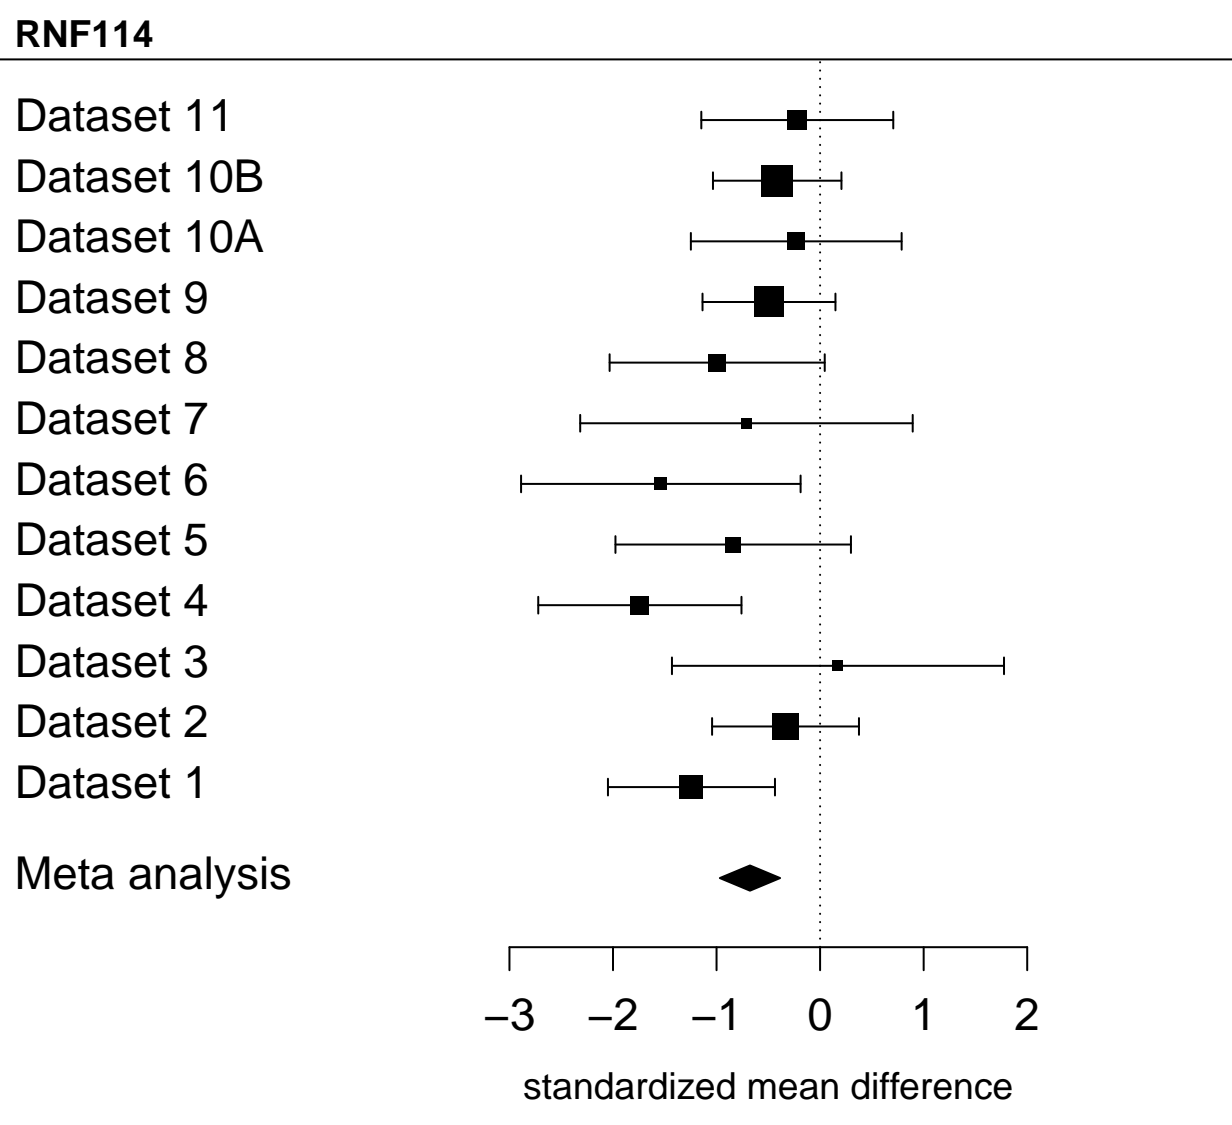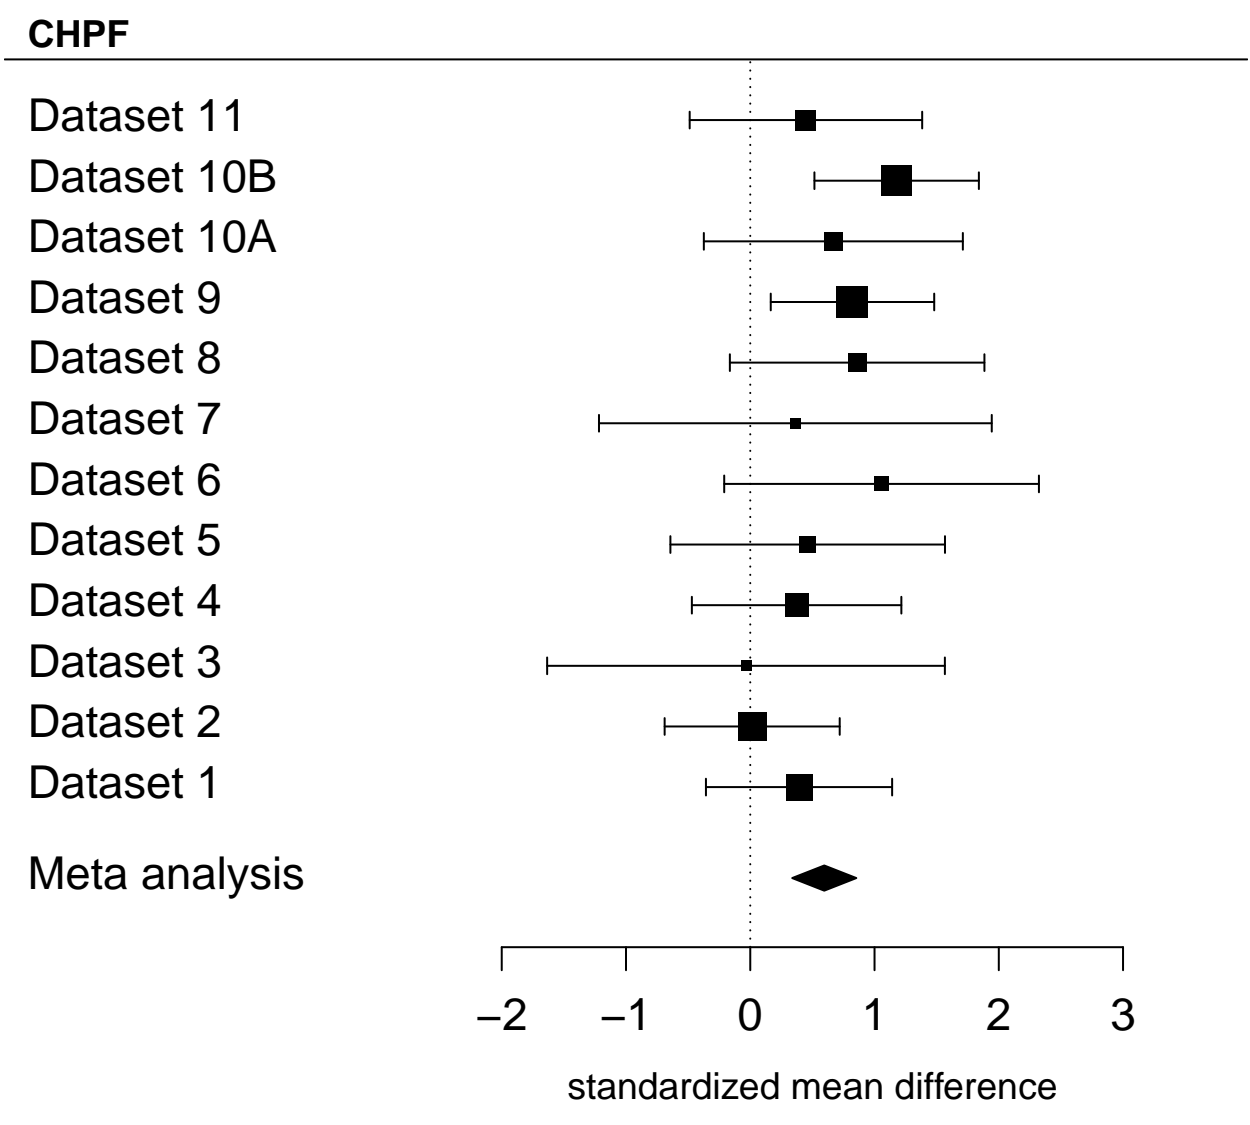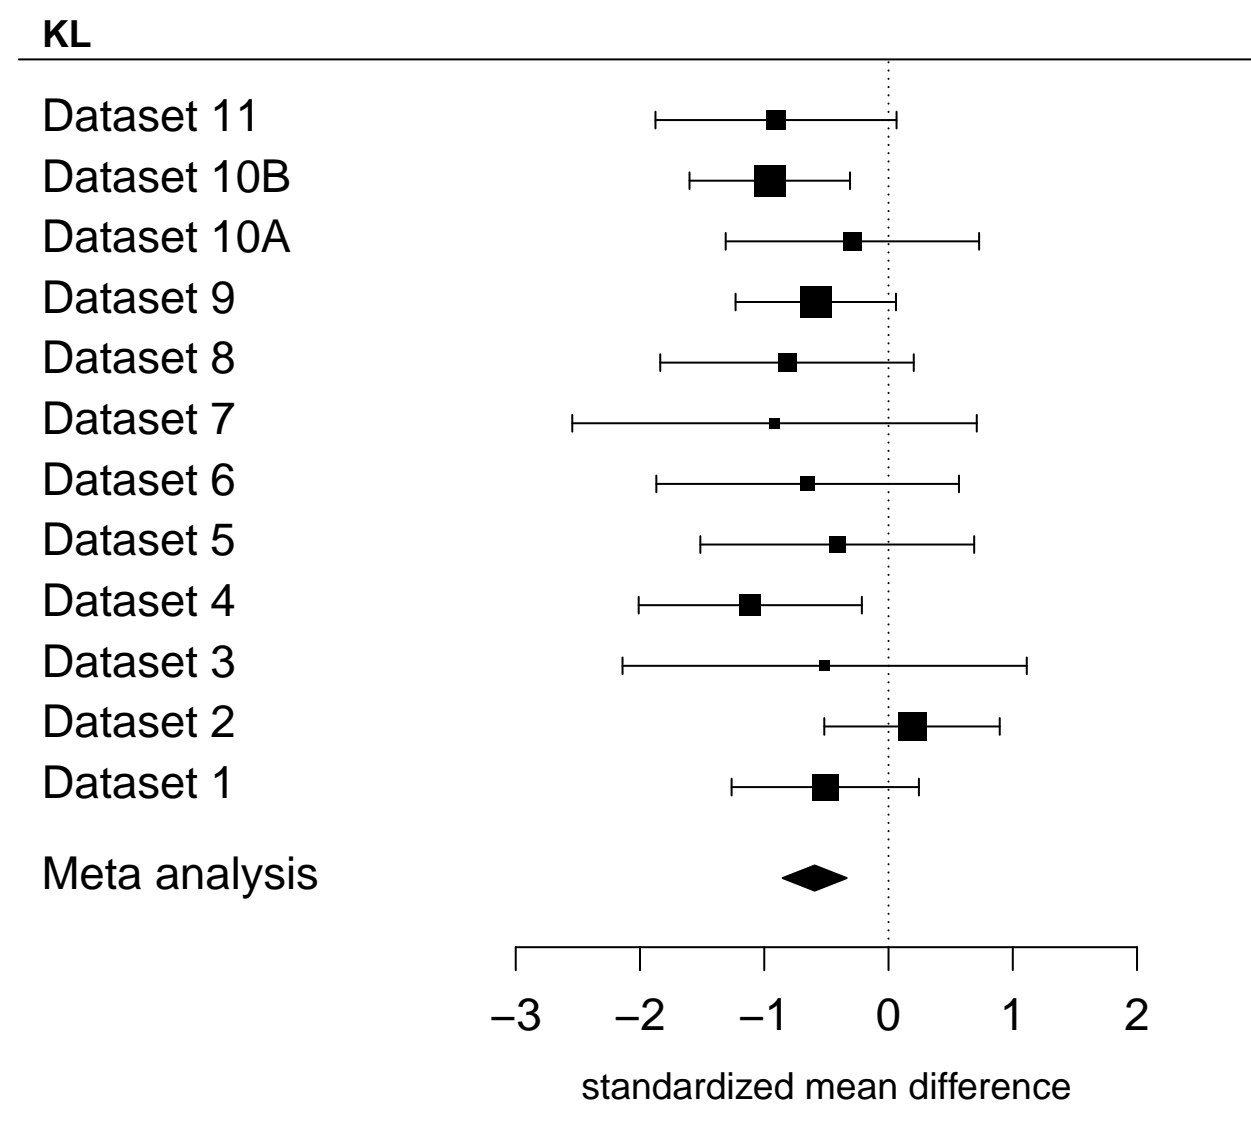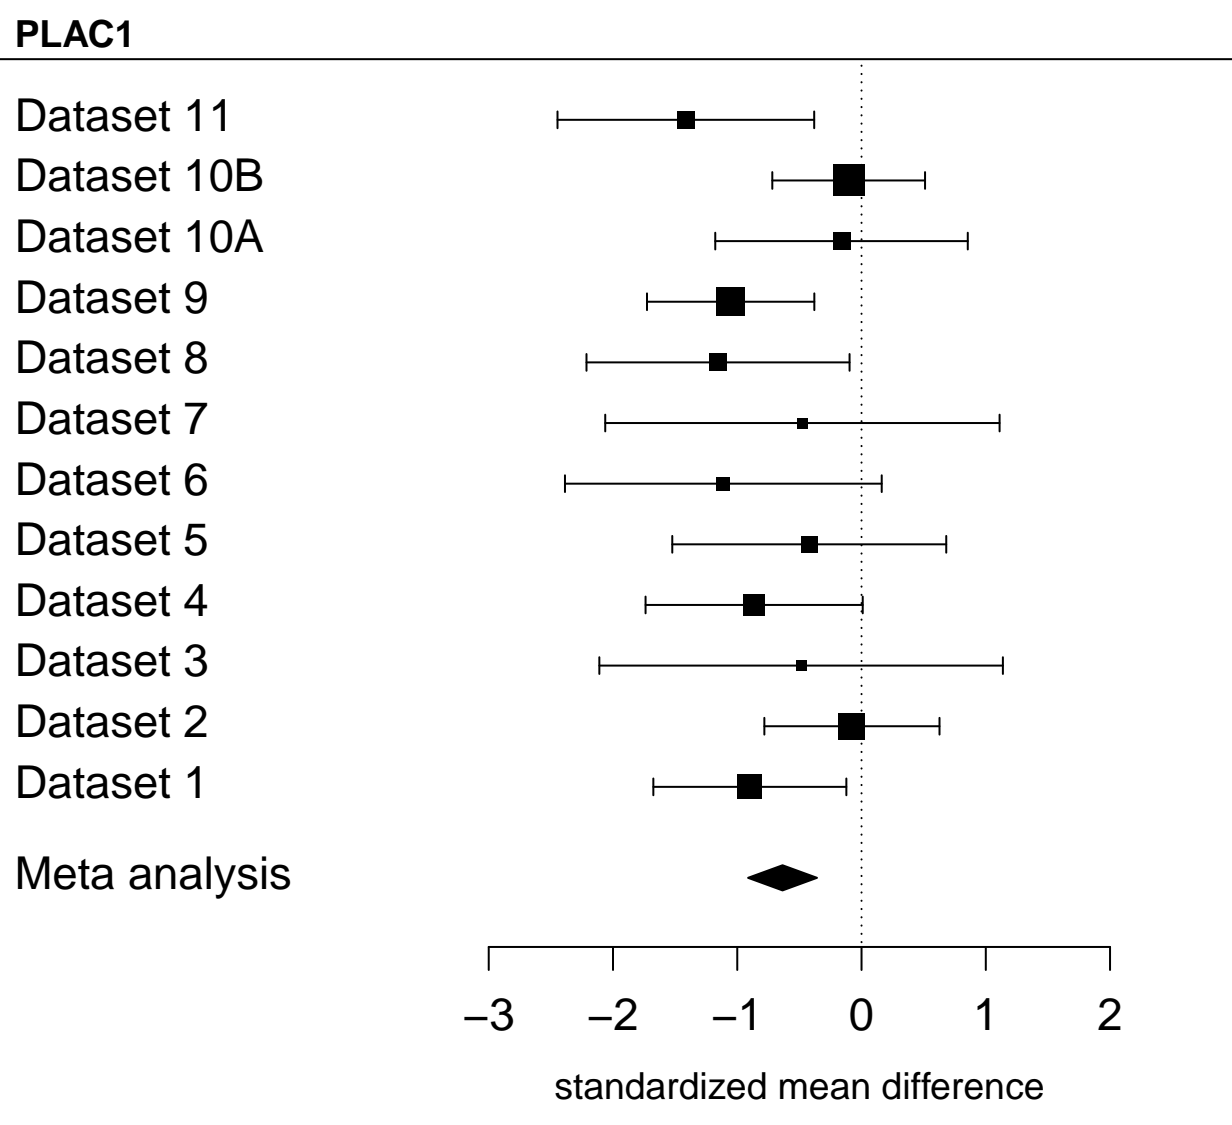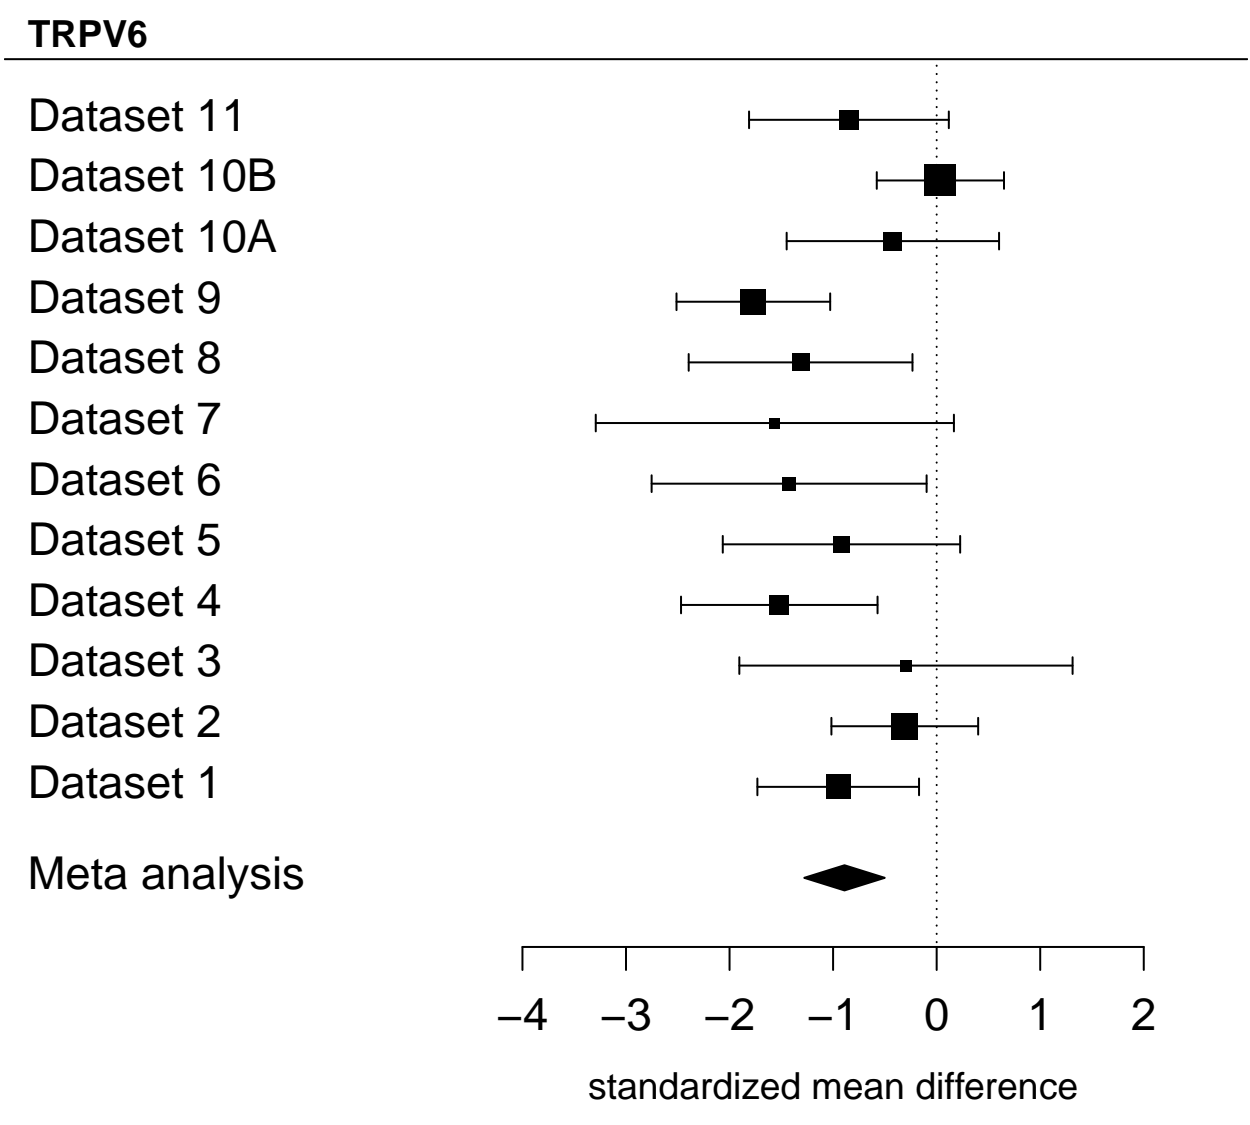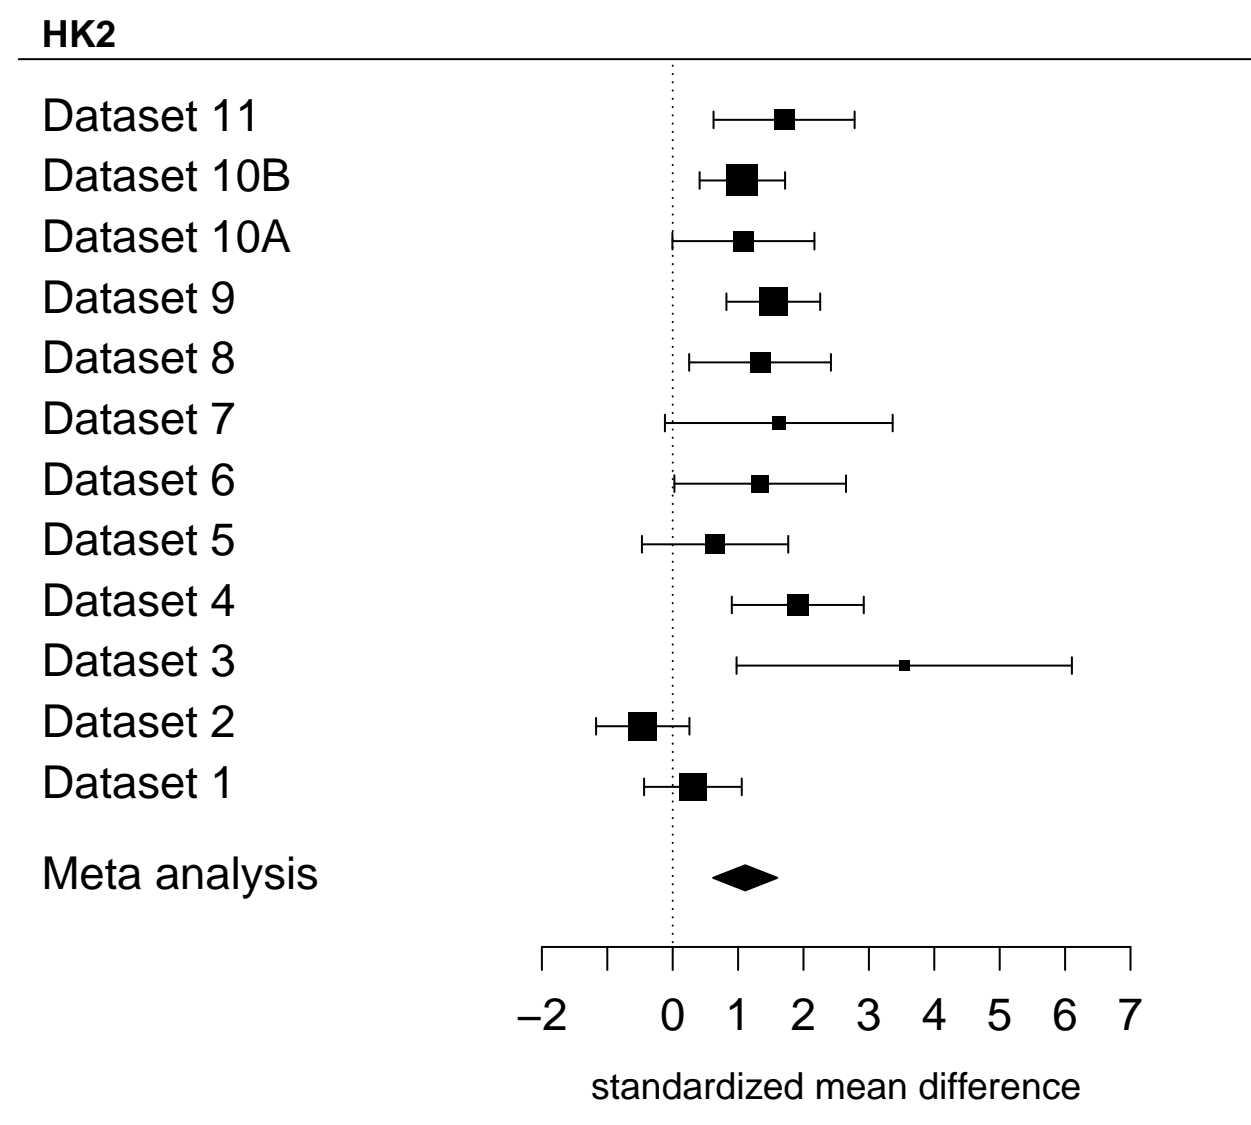



**CCND2**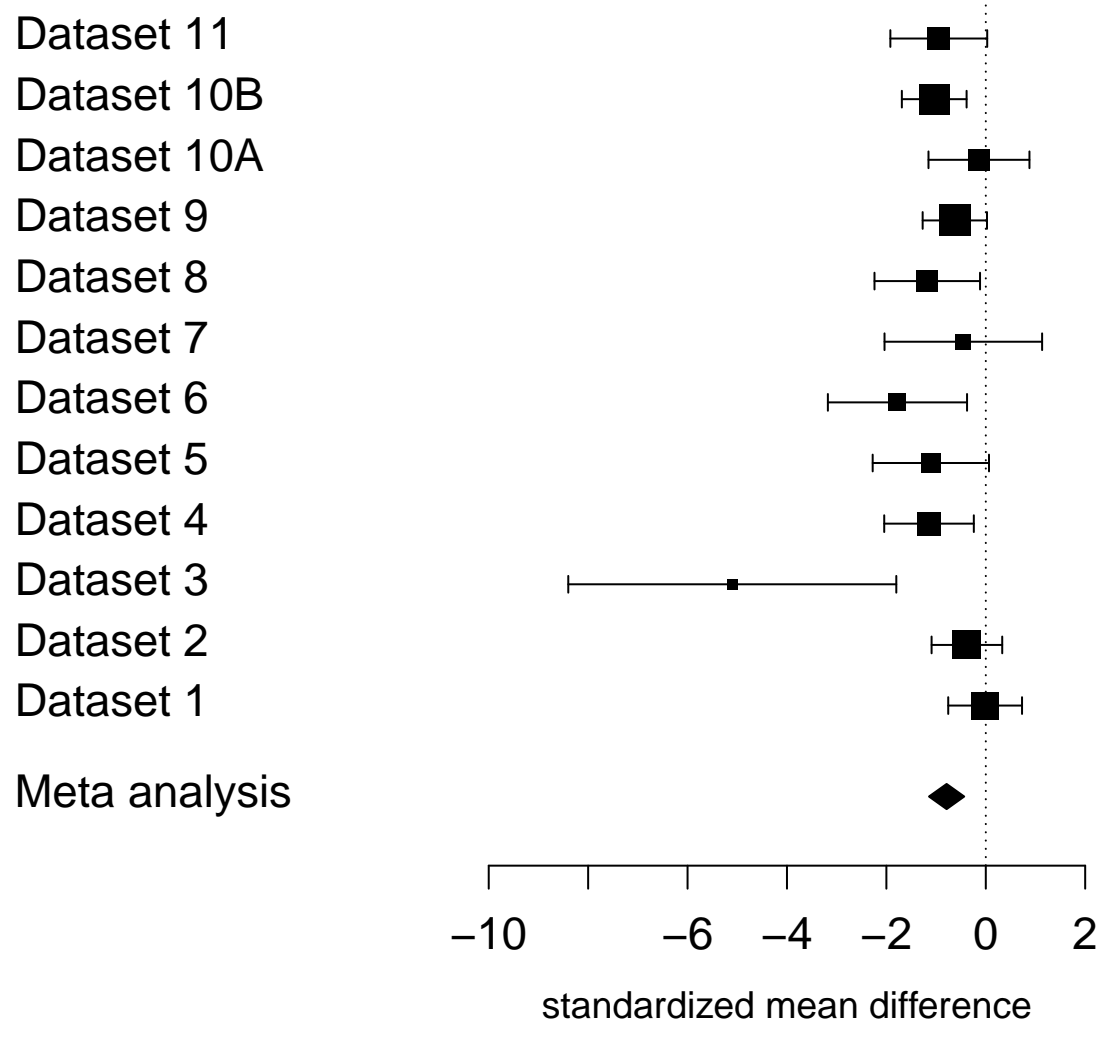**ZNF185**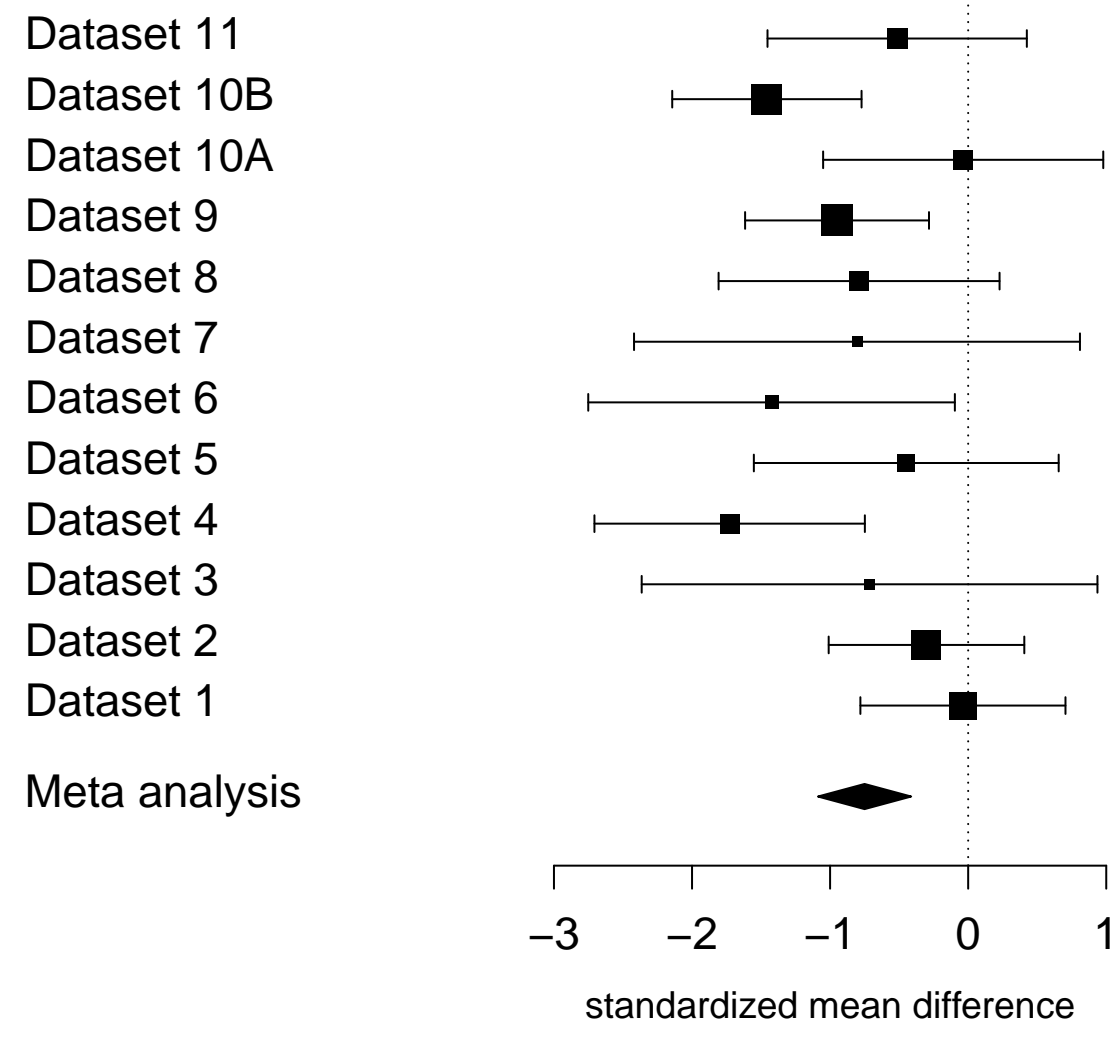**BACH1**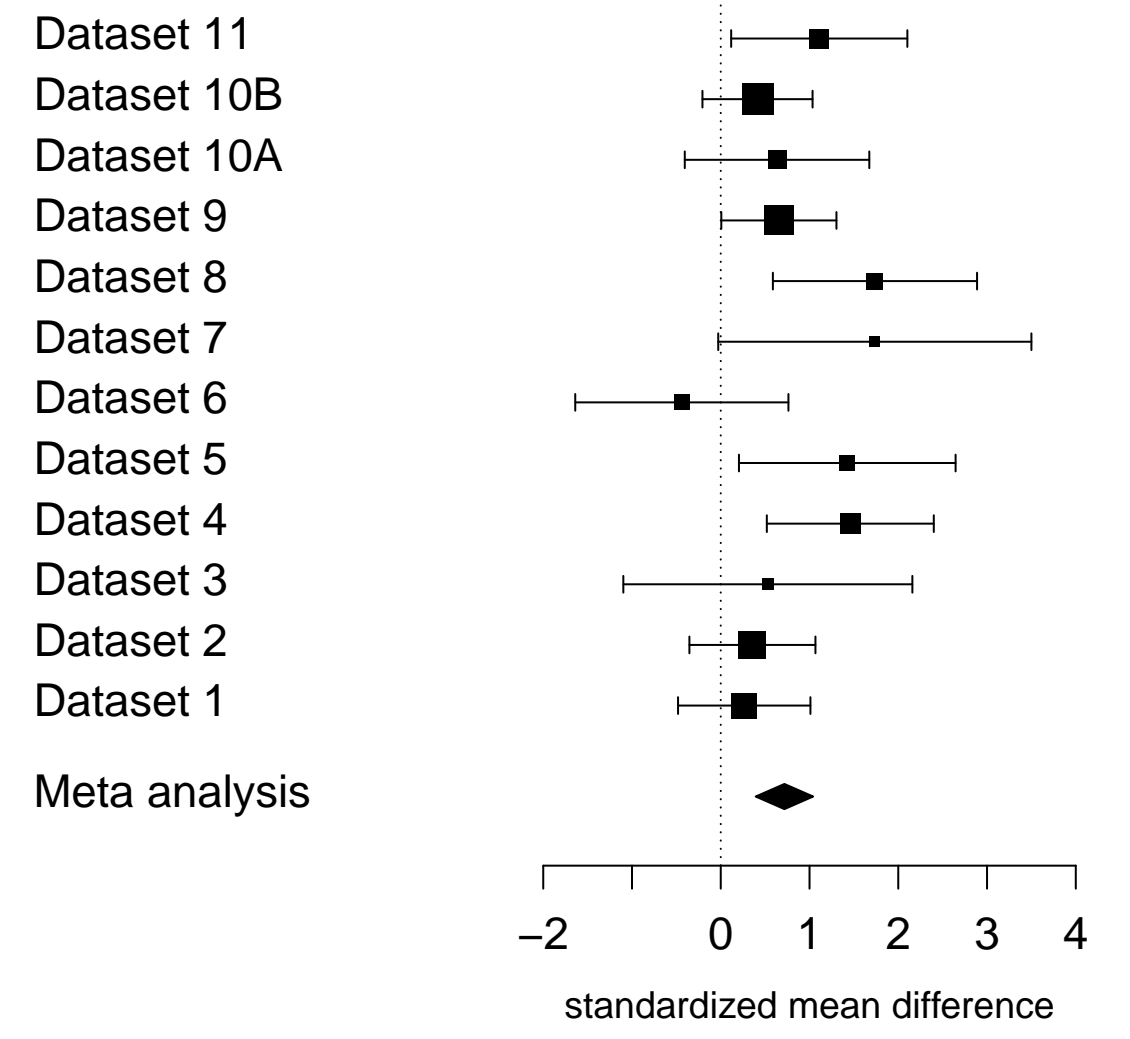**MYO9A**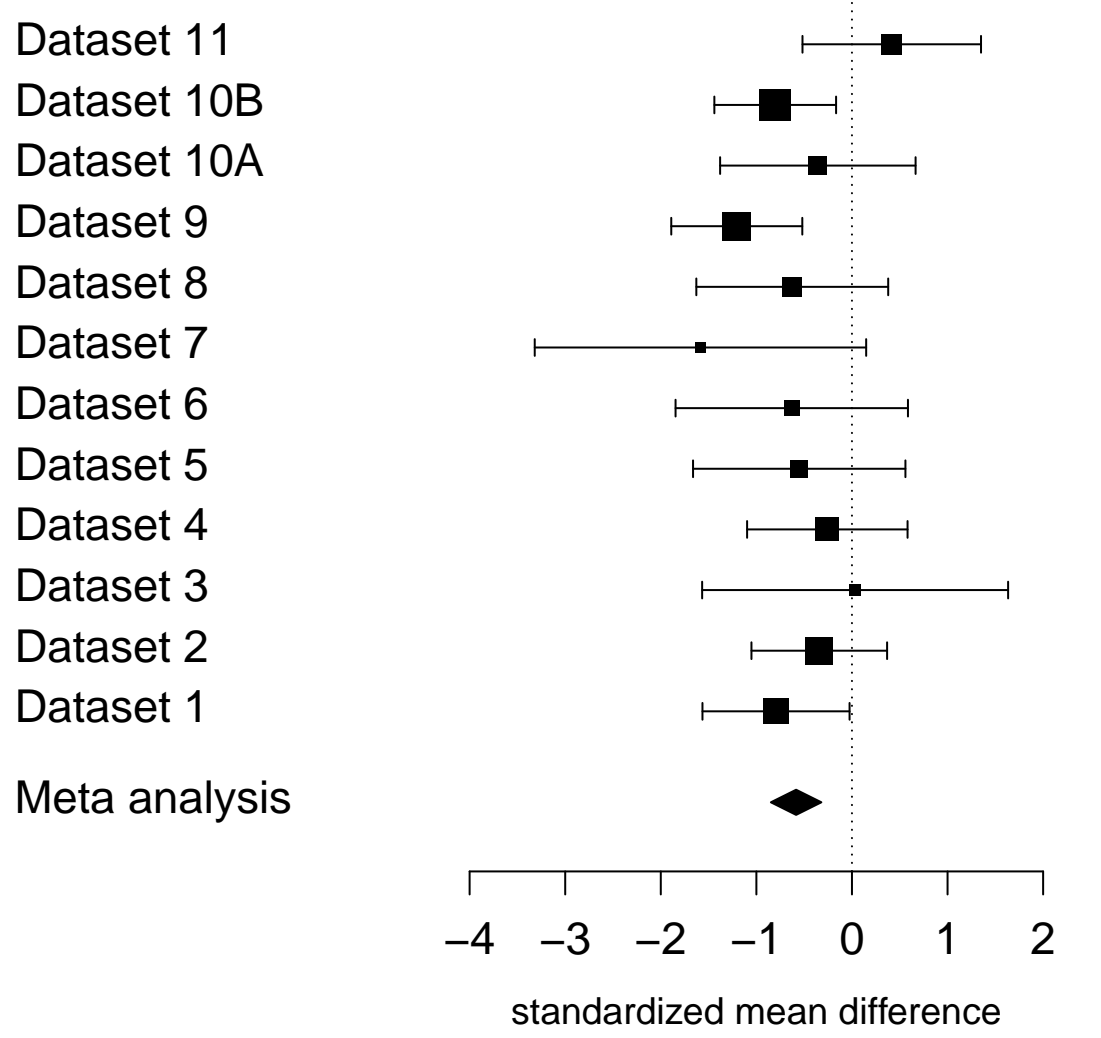**KANSL2**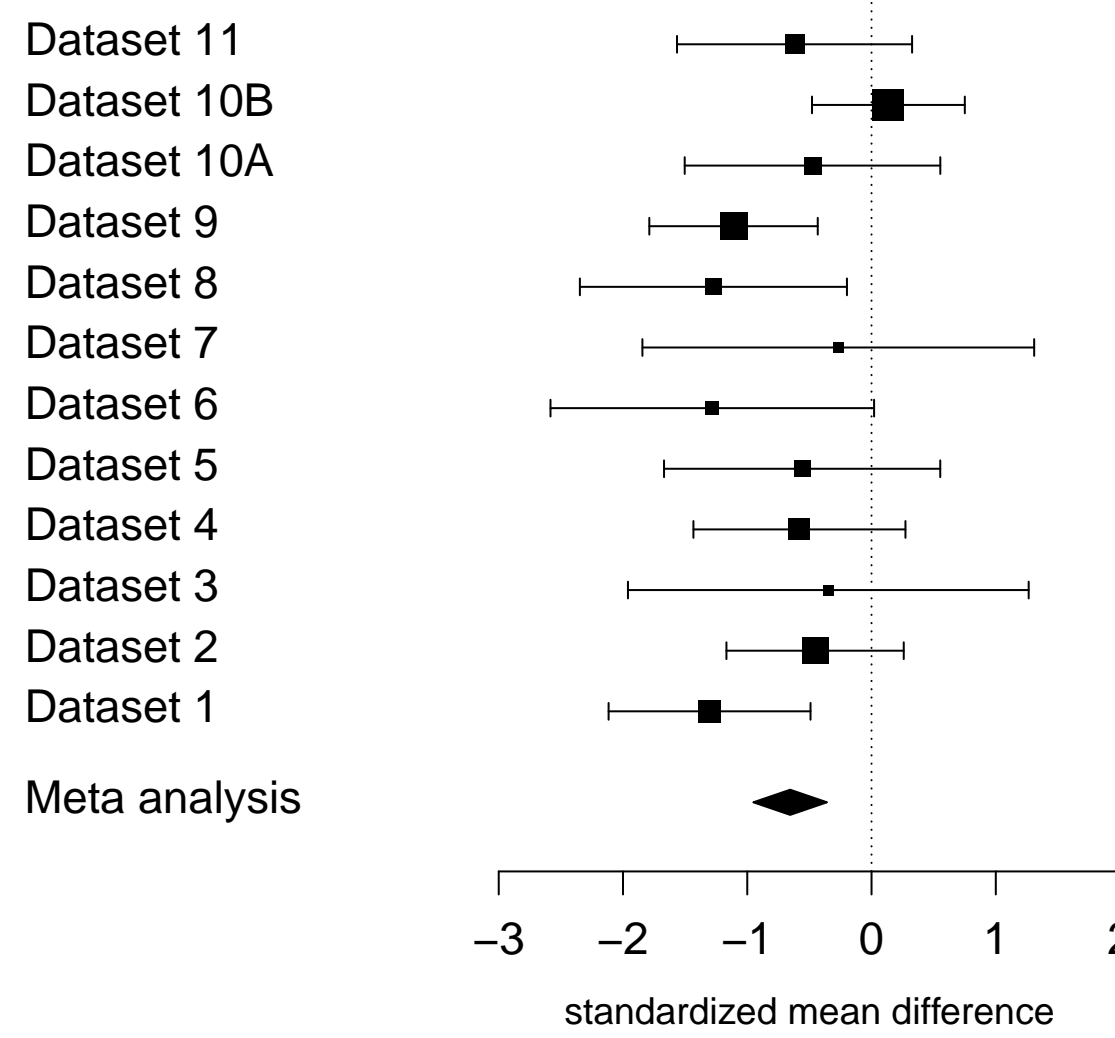**LAMA5**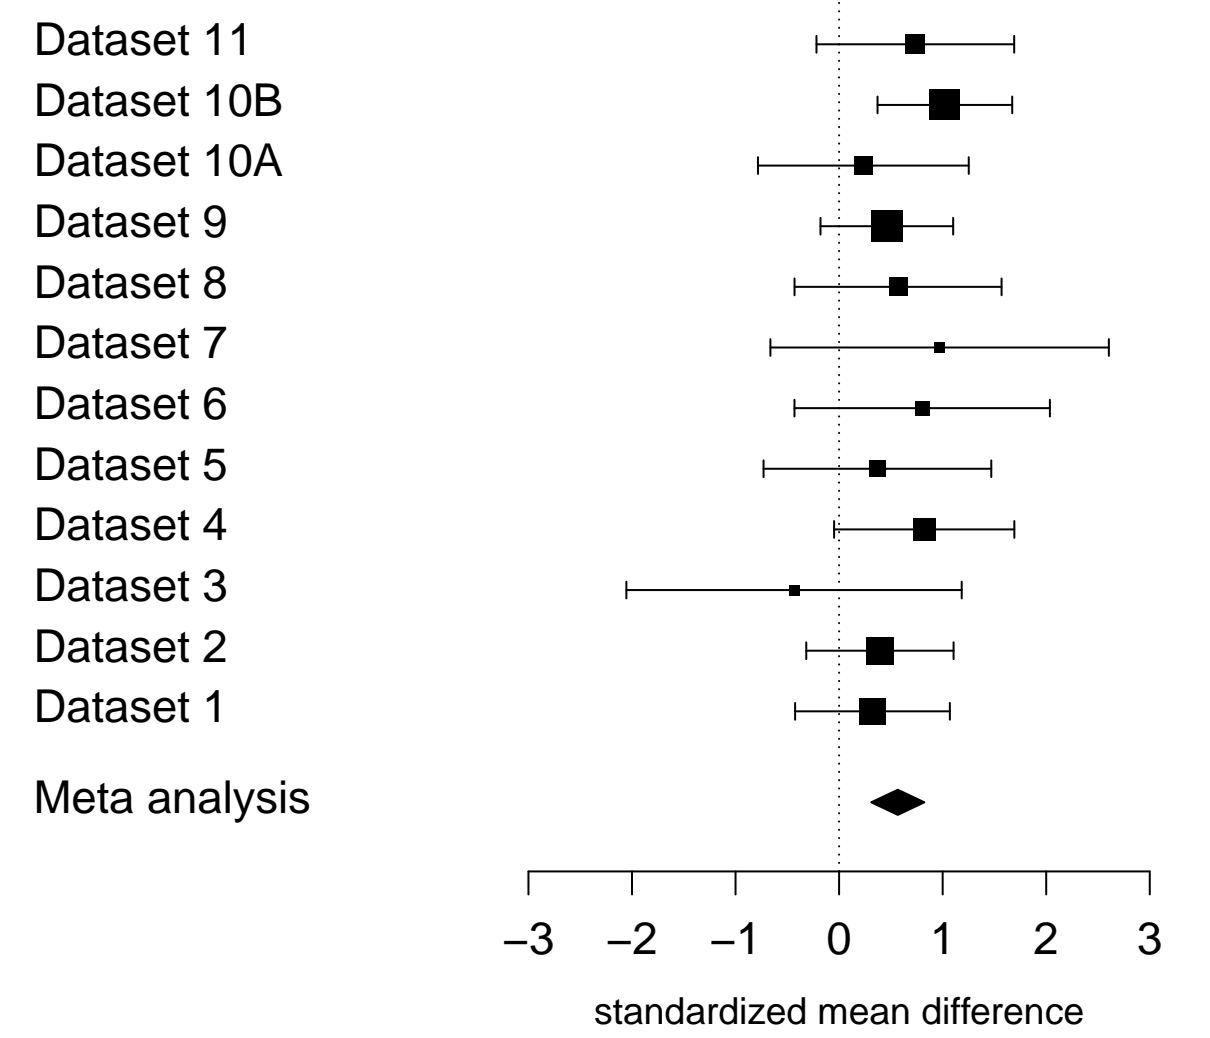**IL1RAP**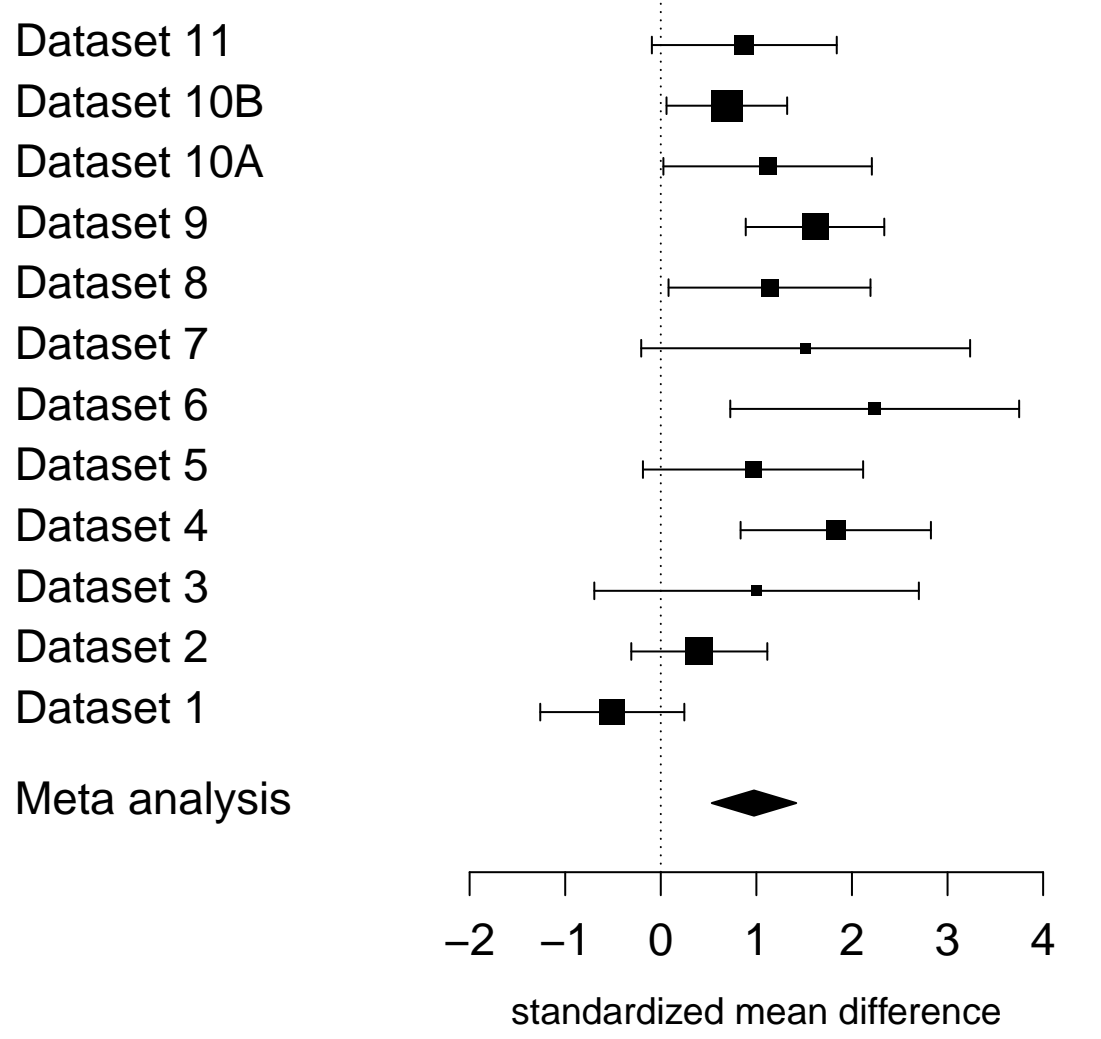**NDEL1**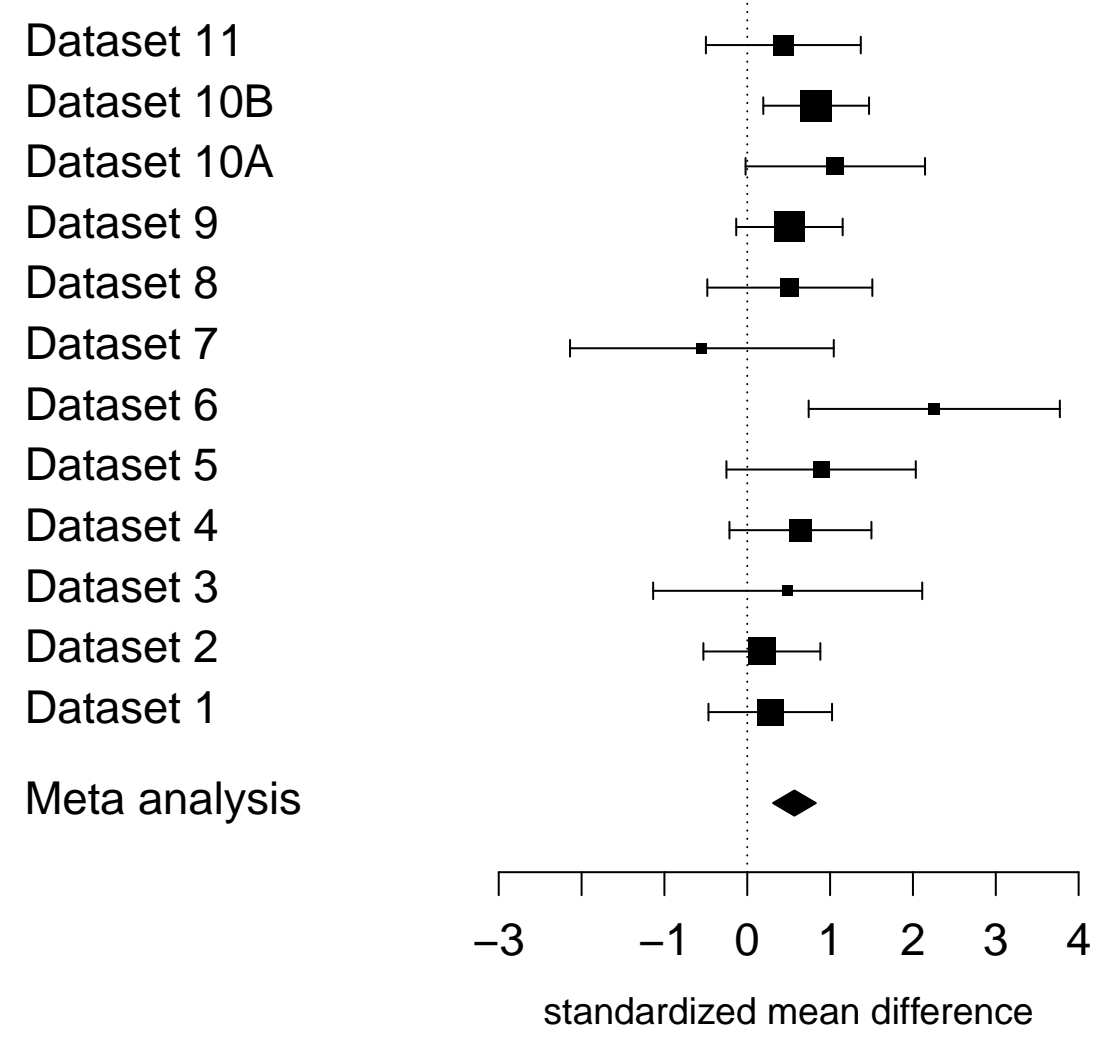**FLNB**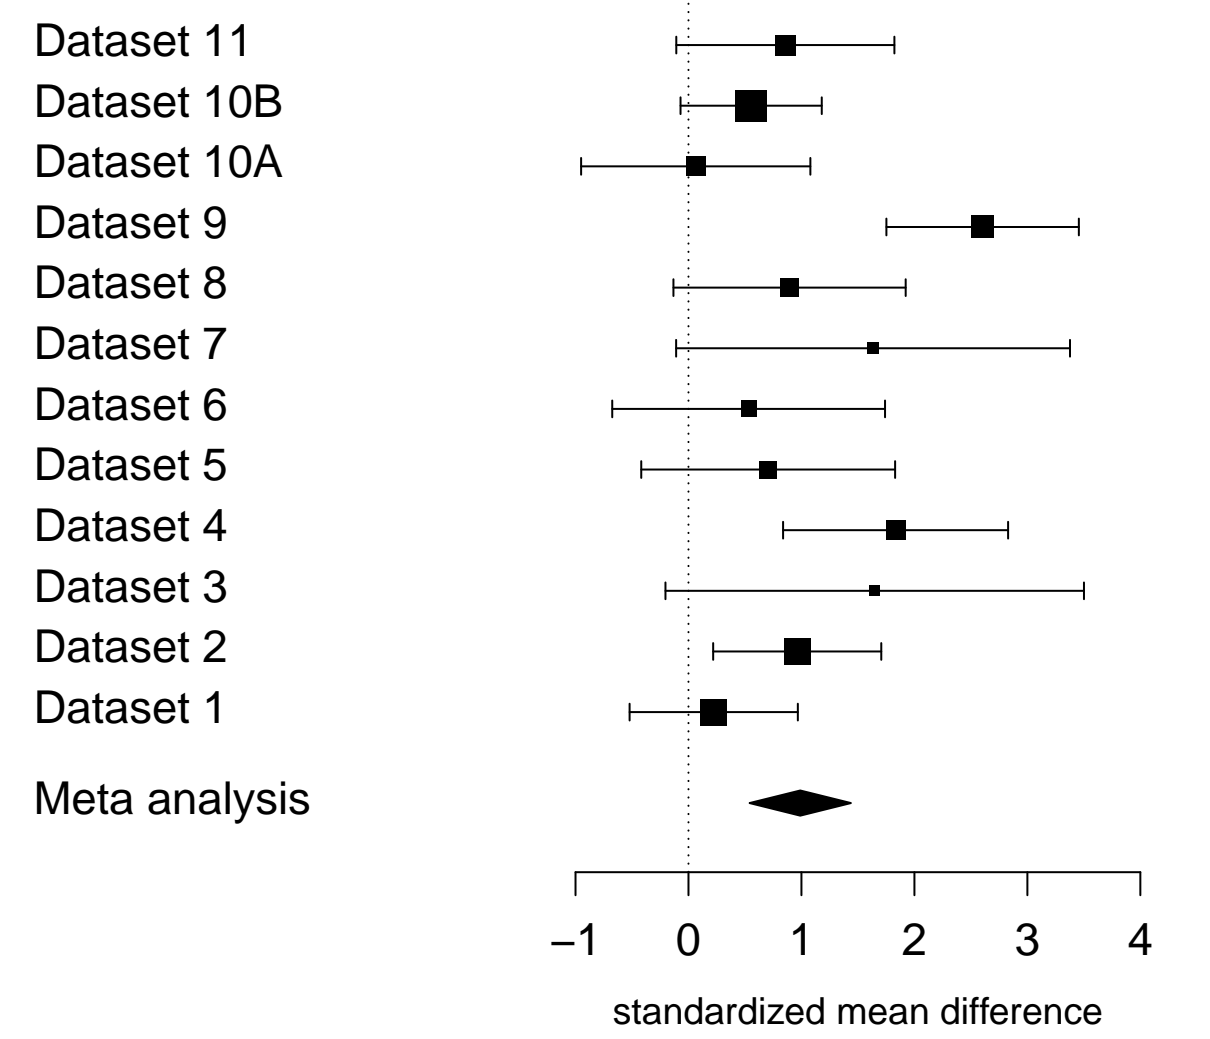**PARP6**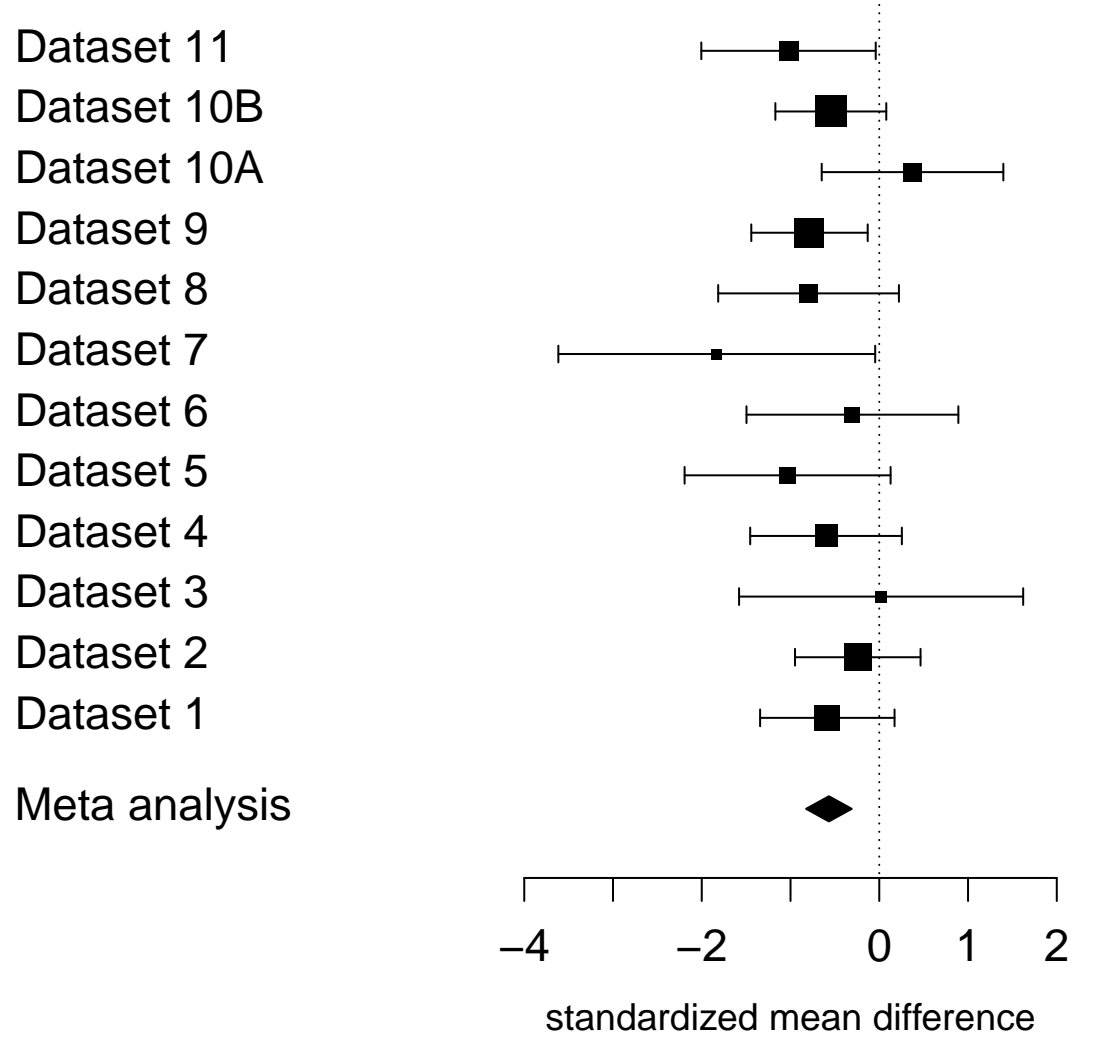**OBSL1**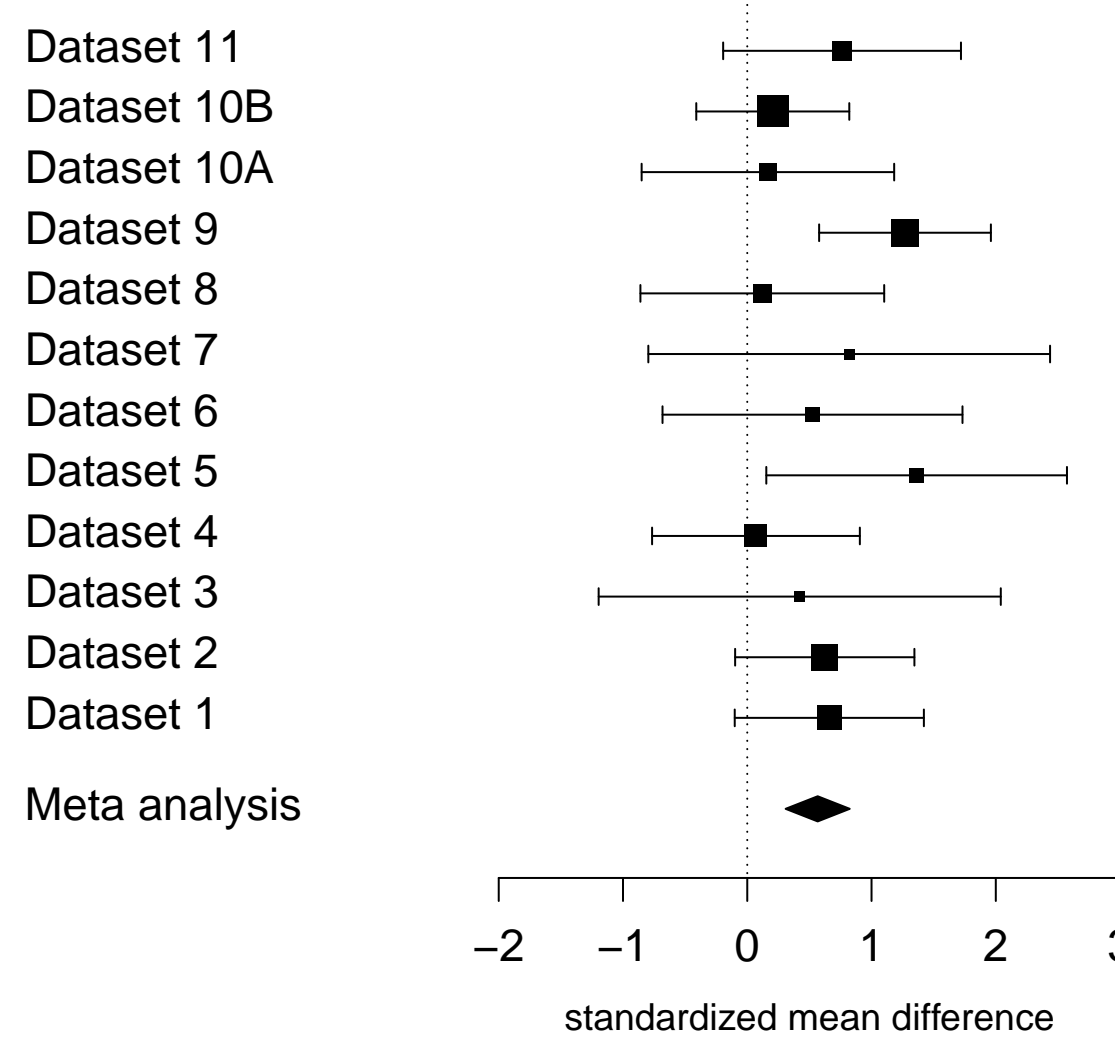**MORC4**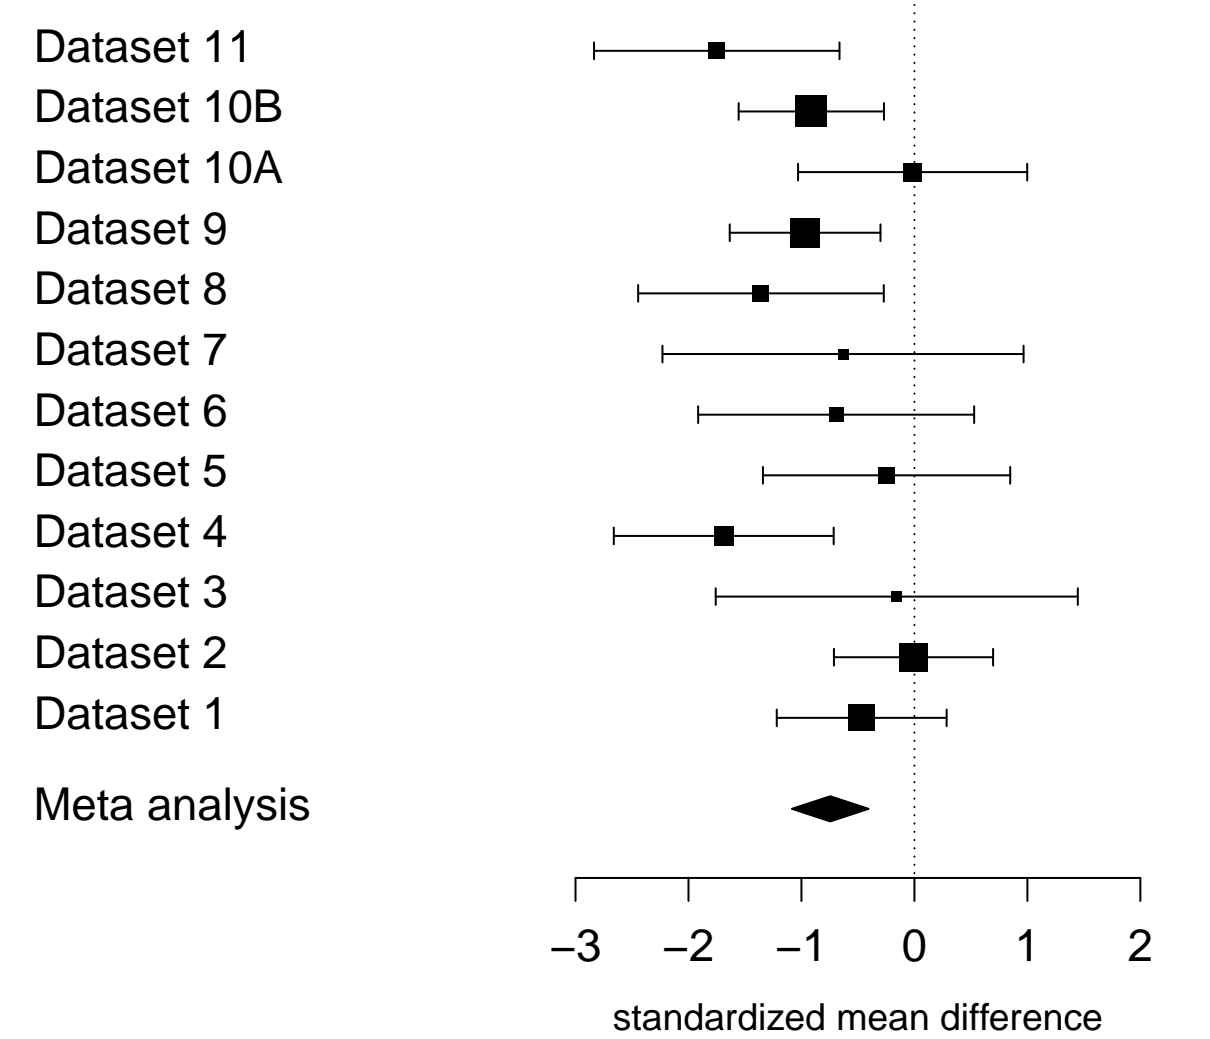



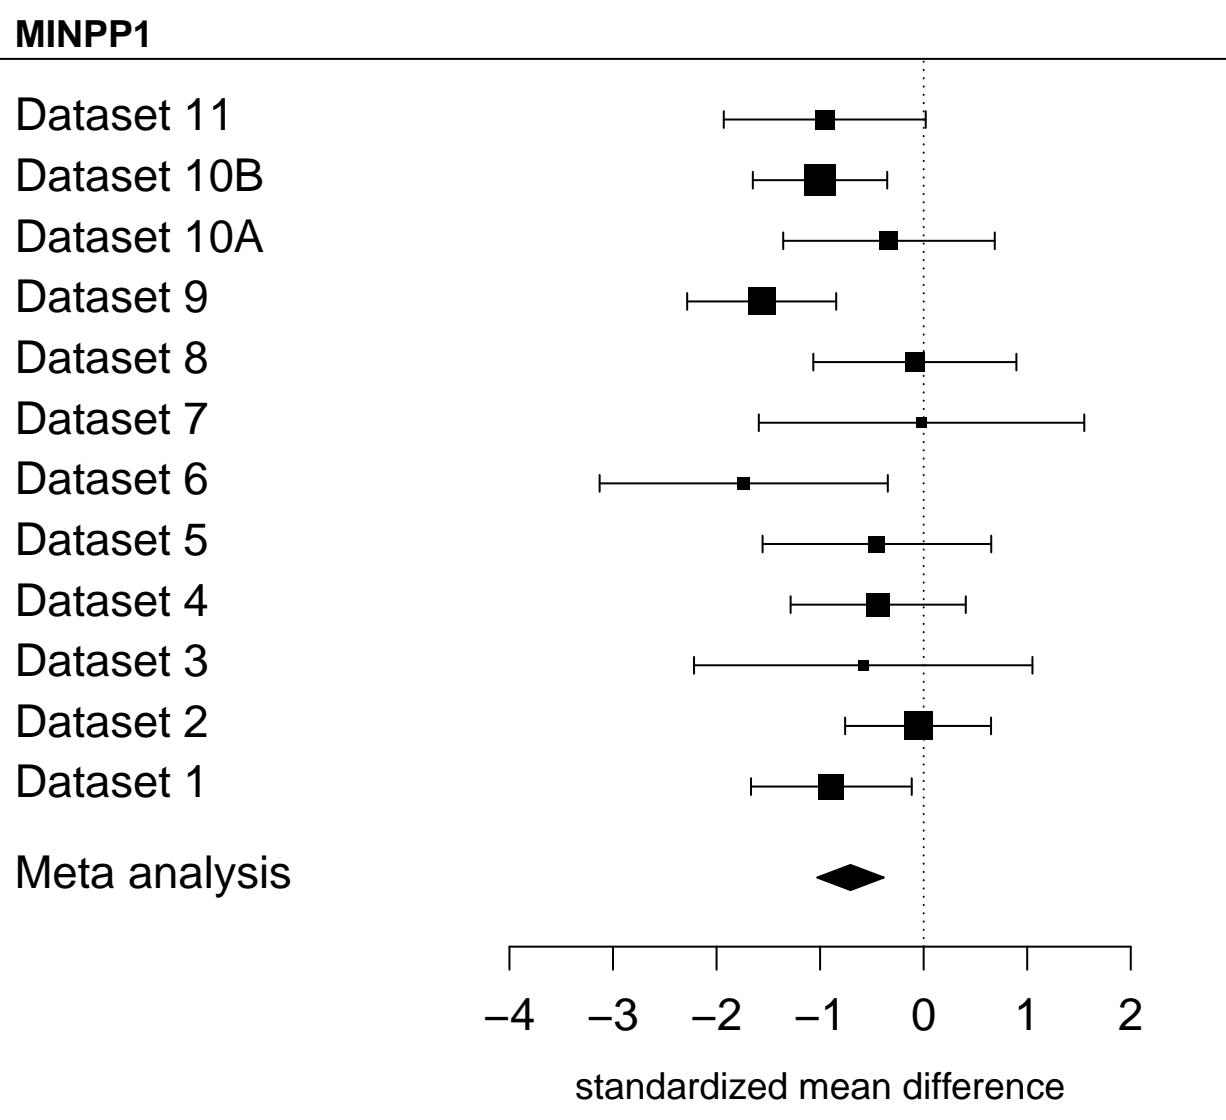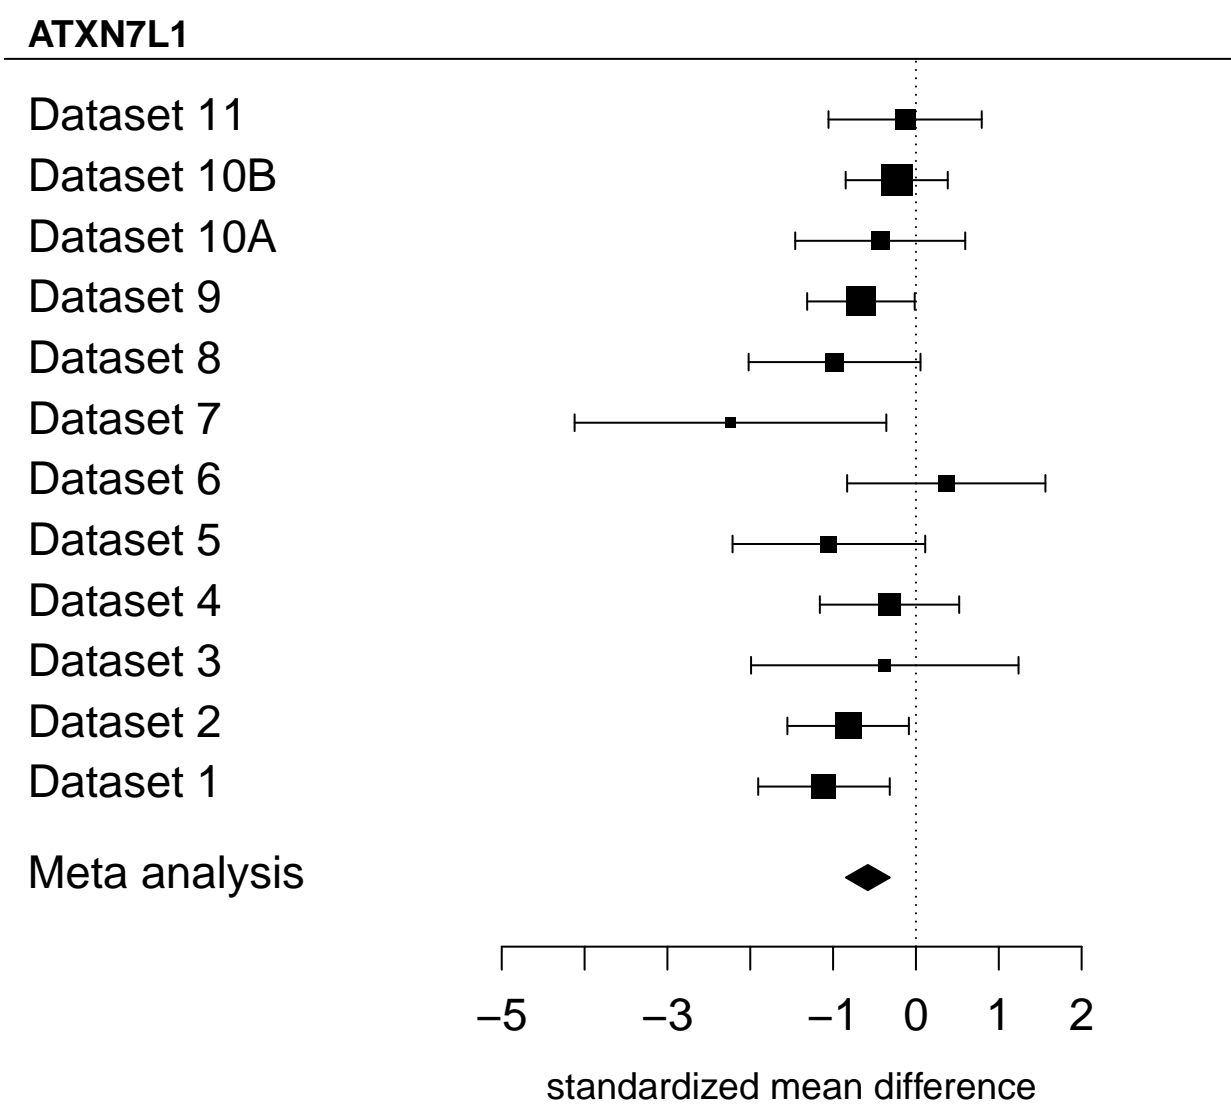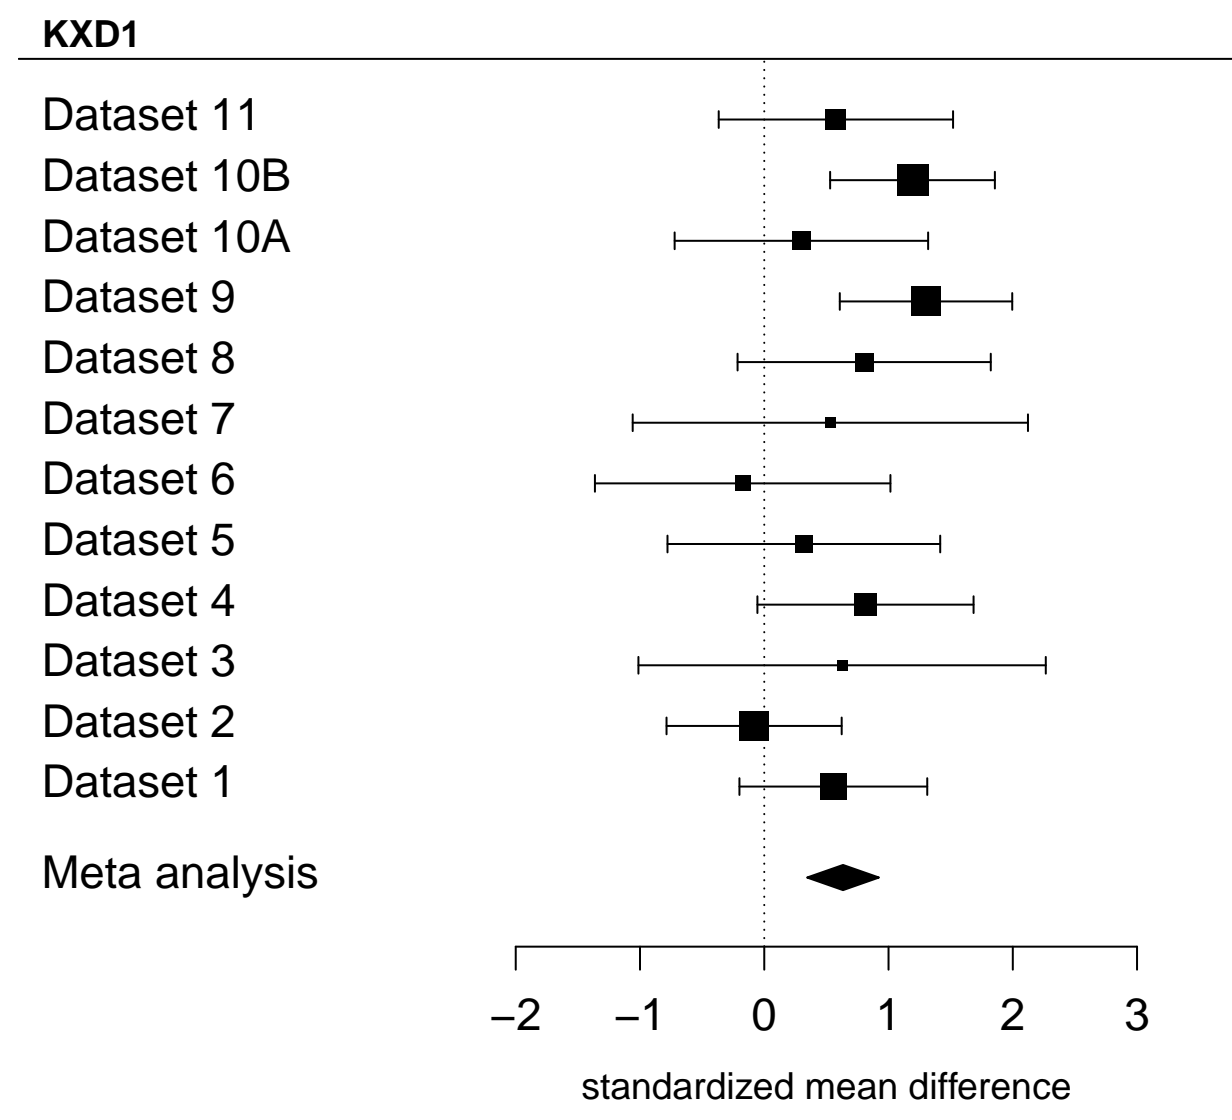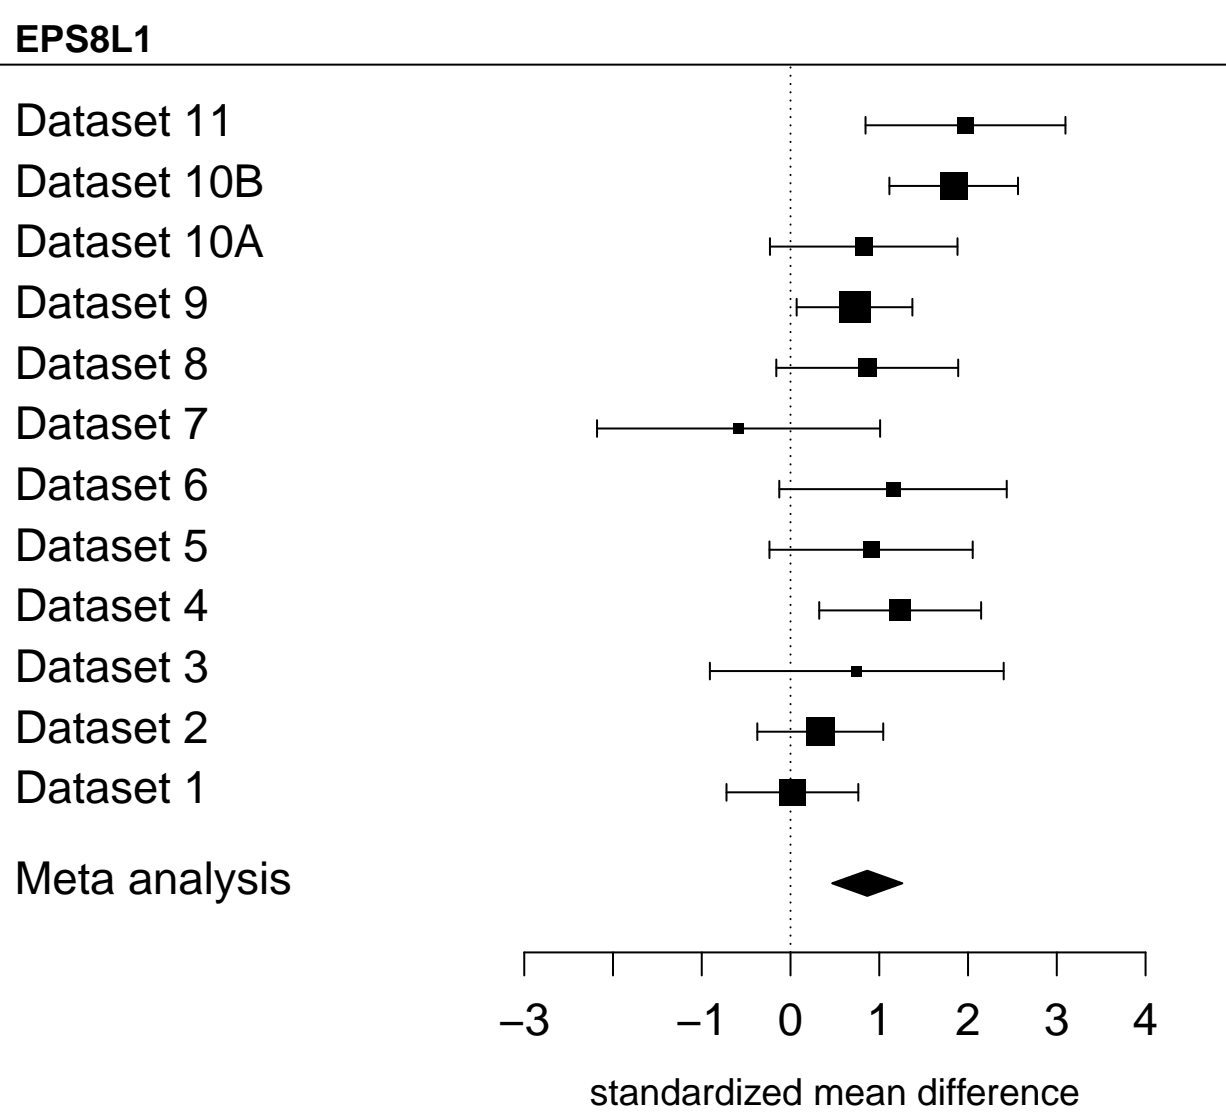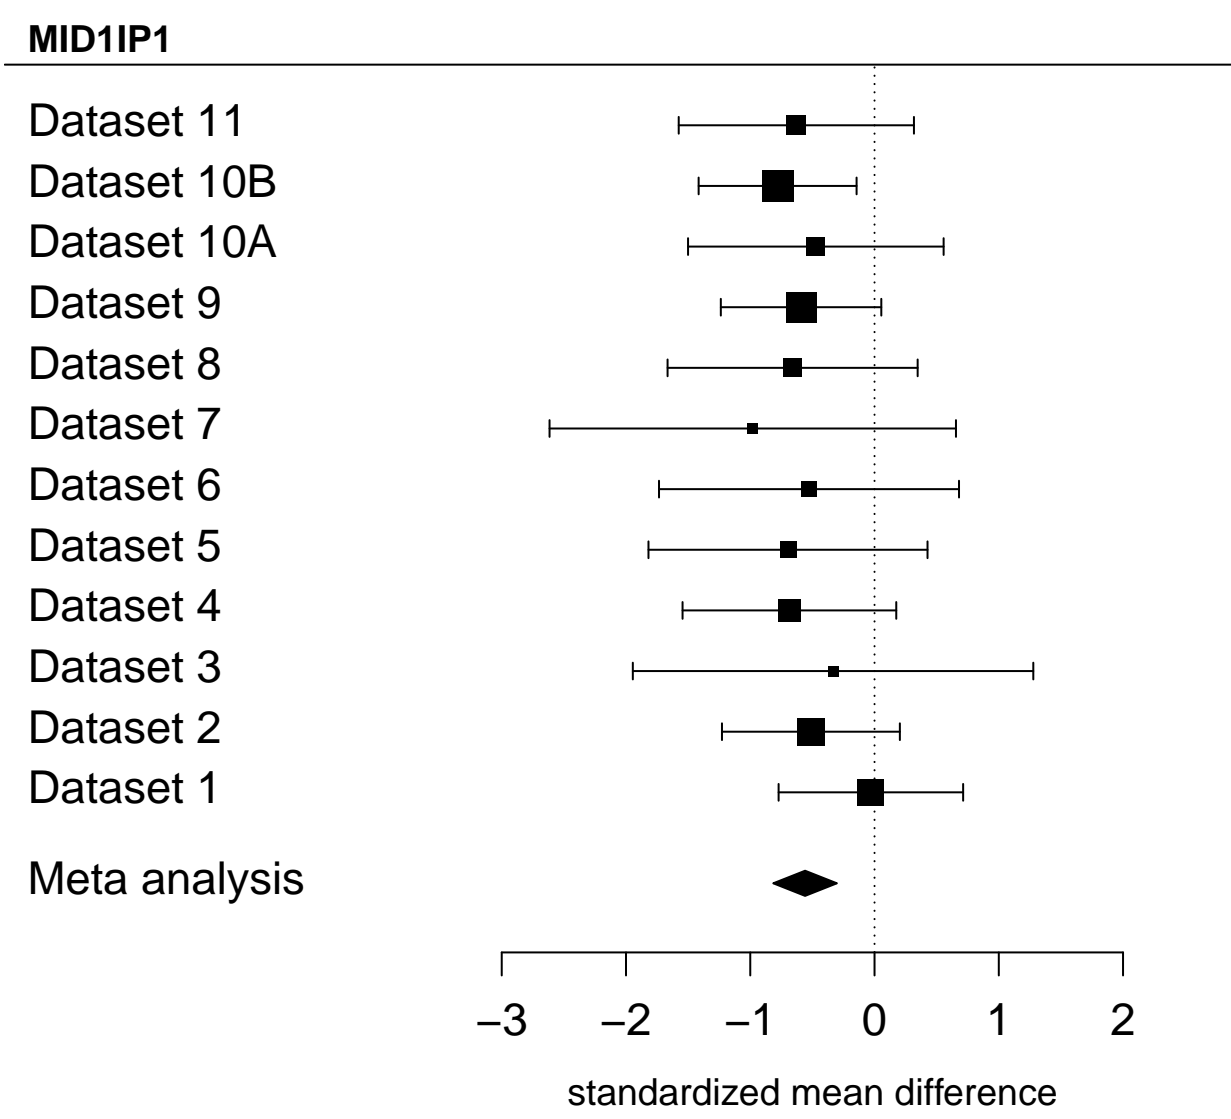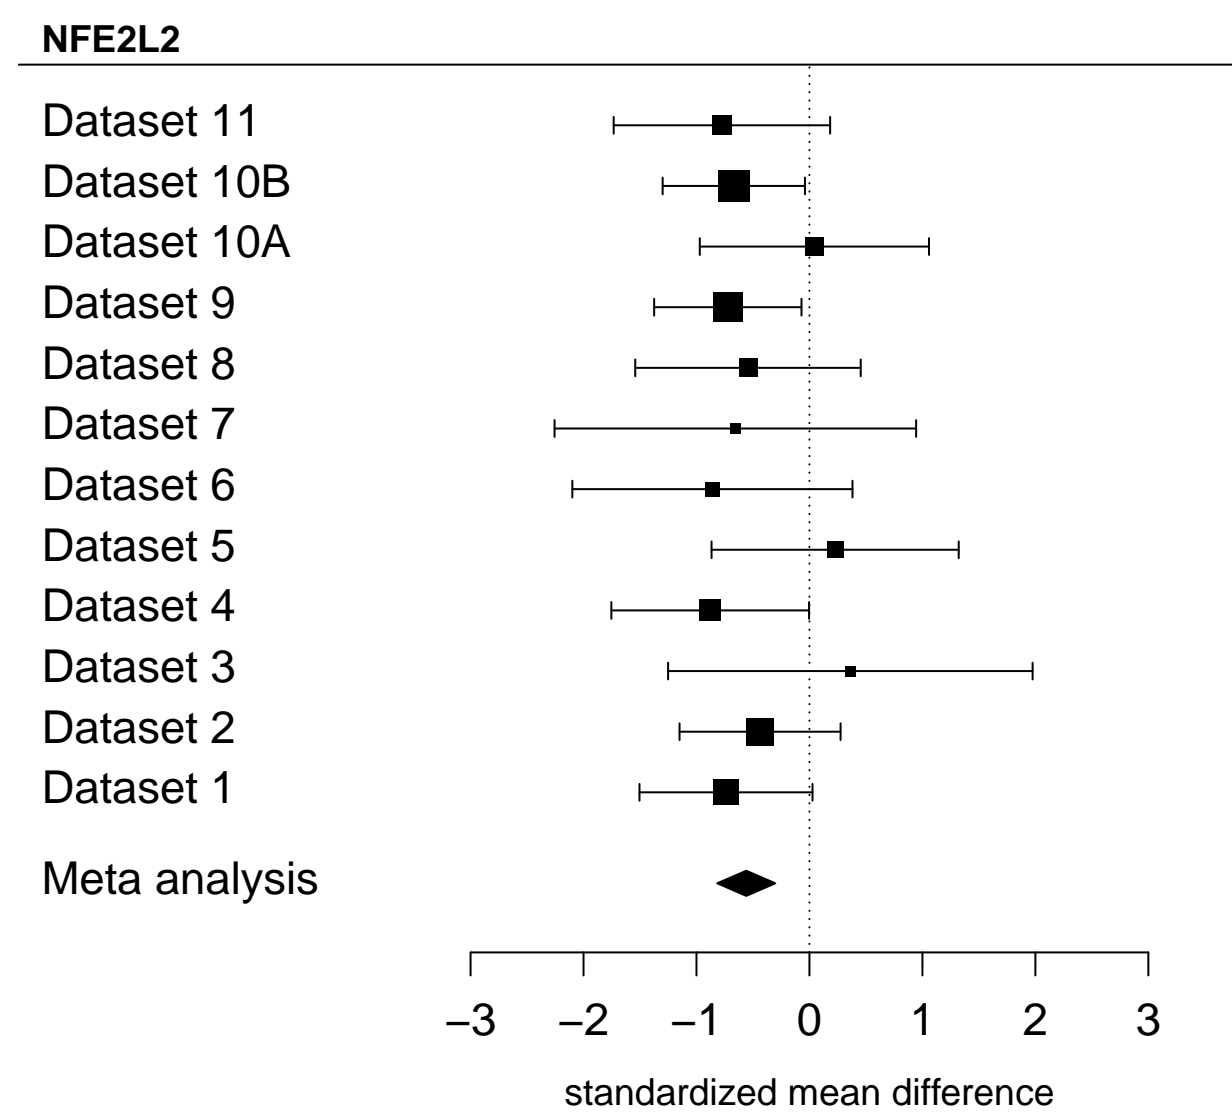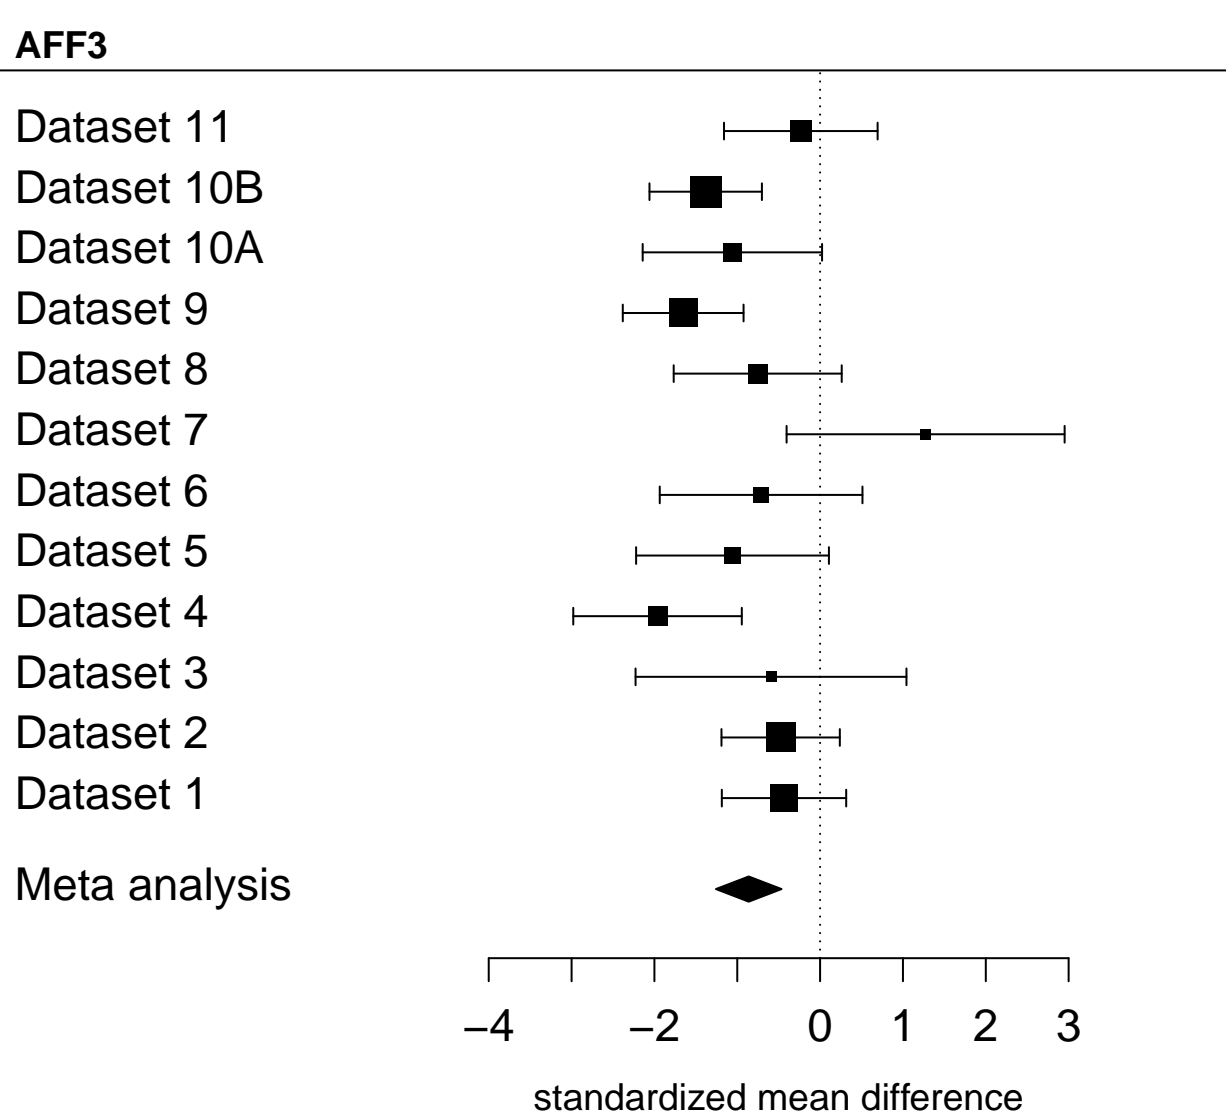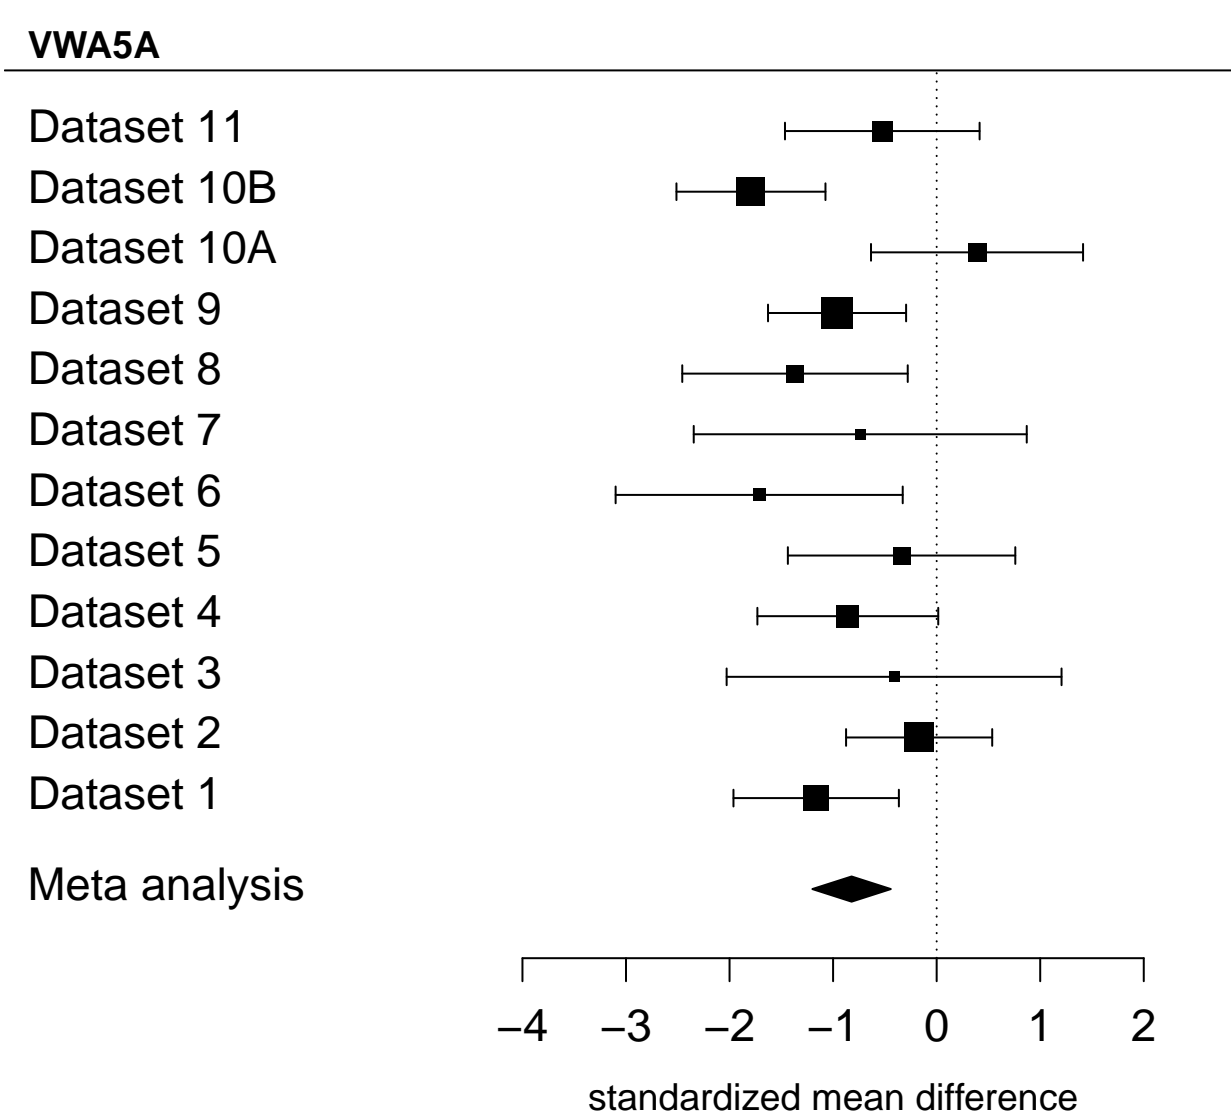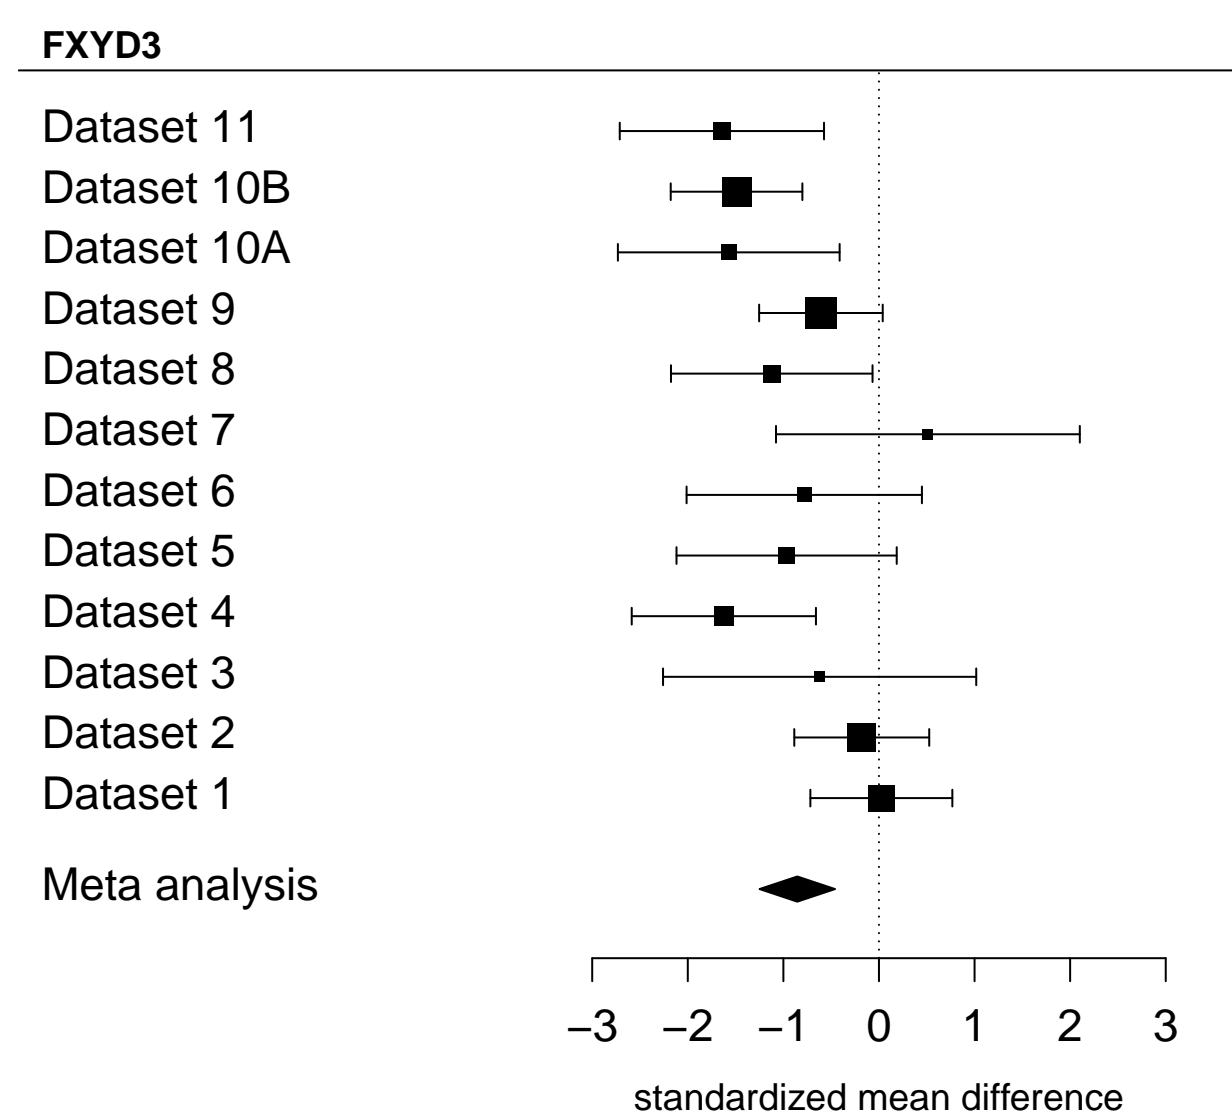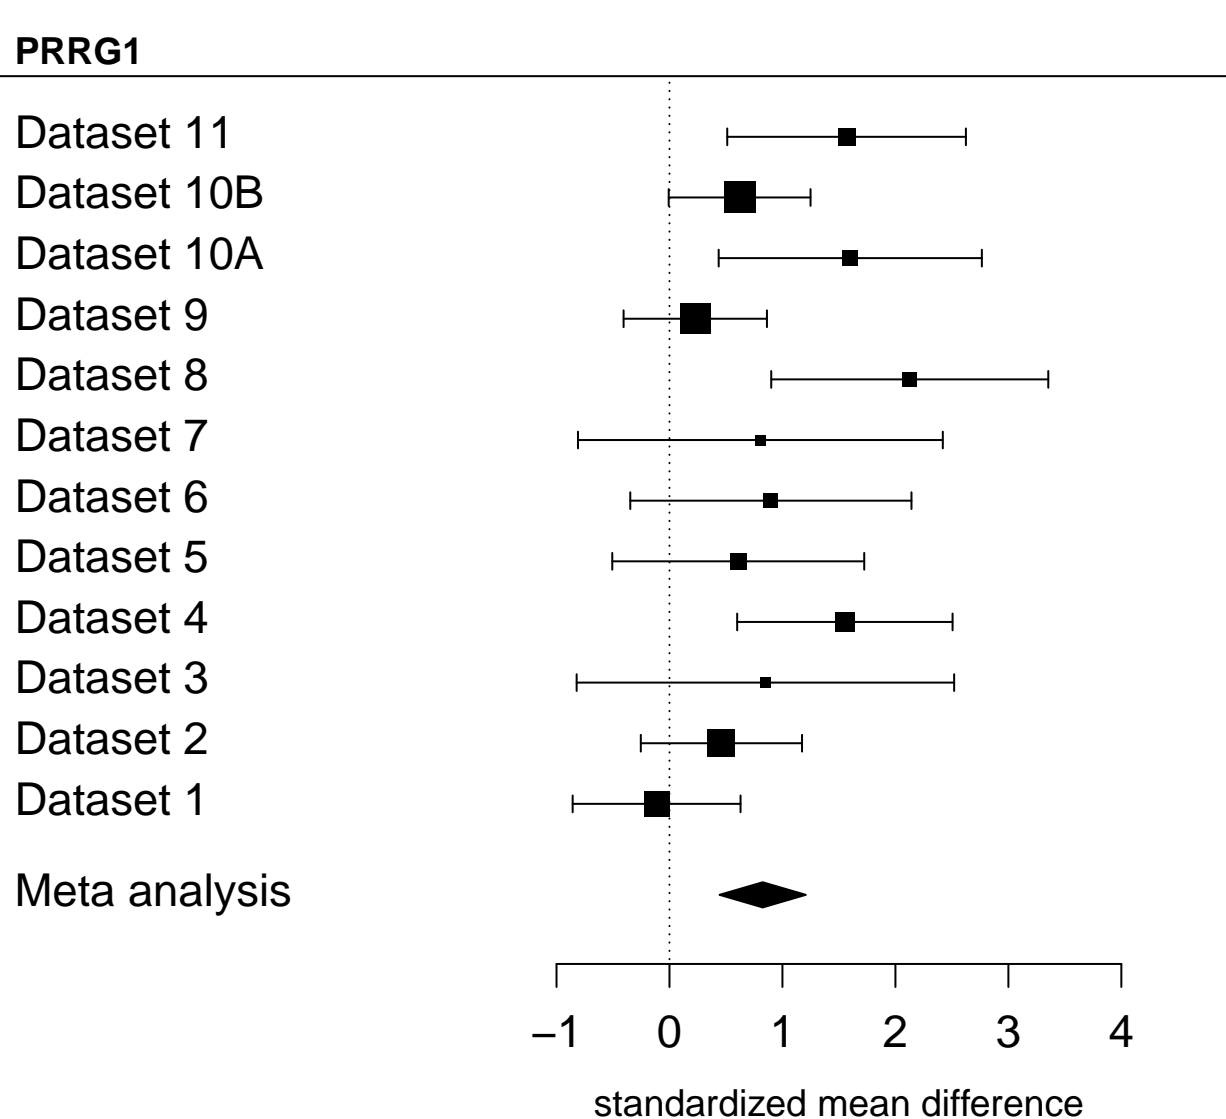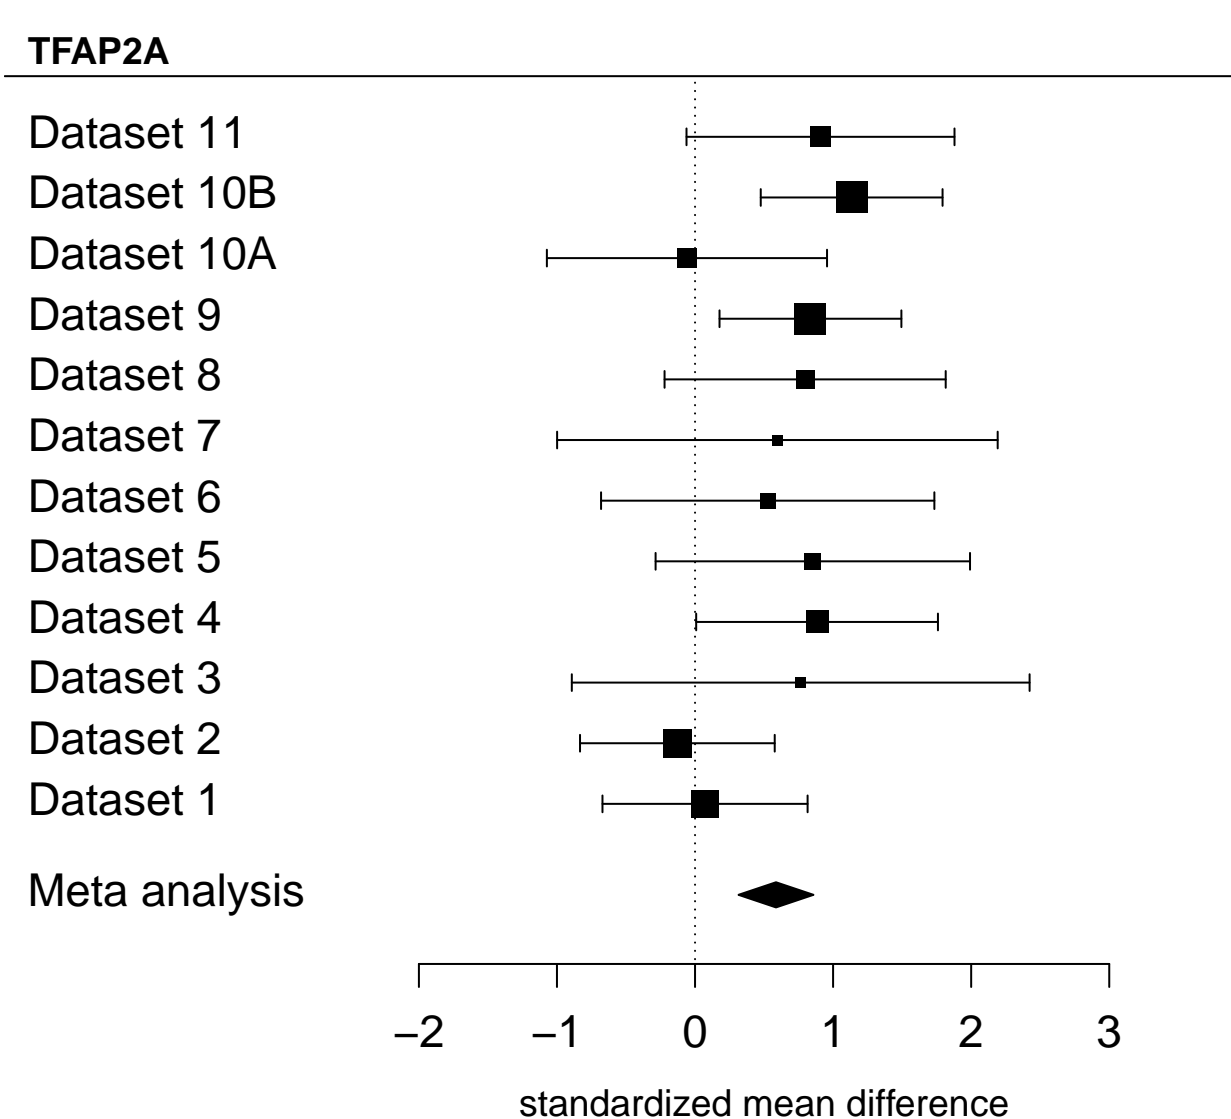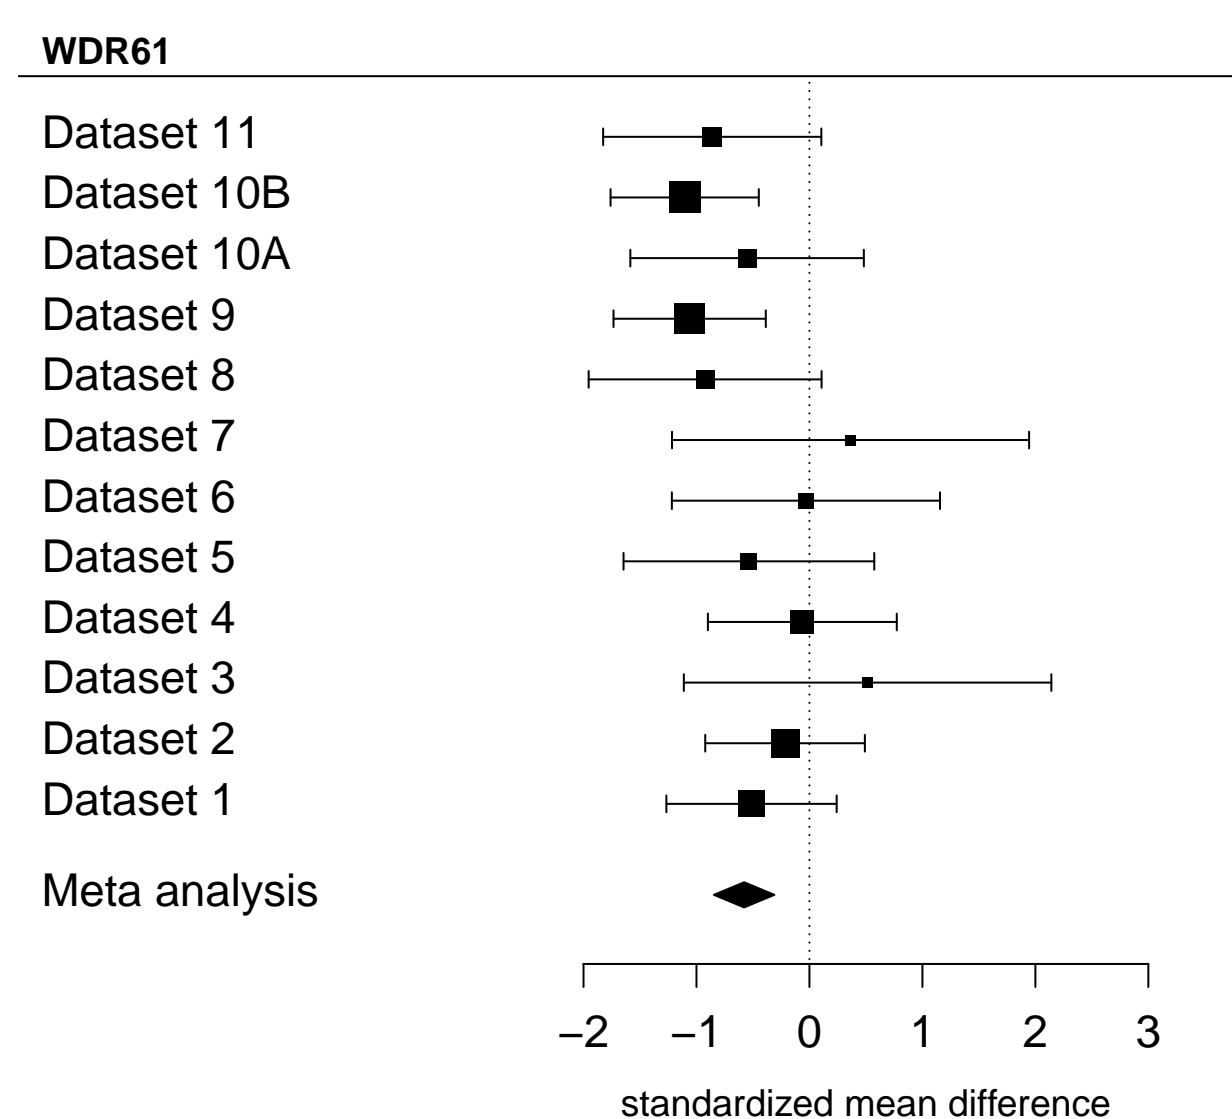

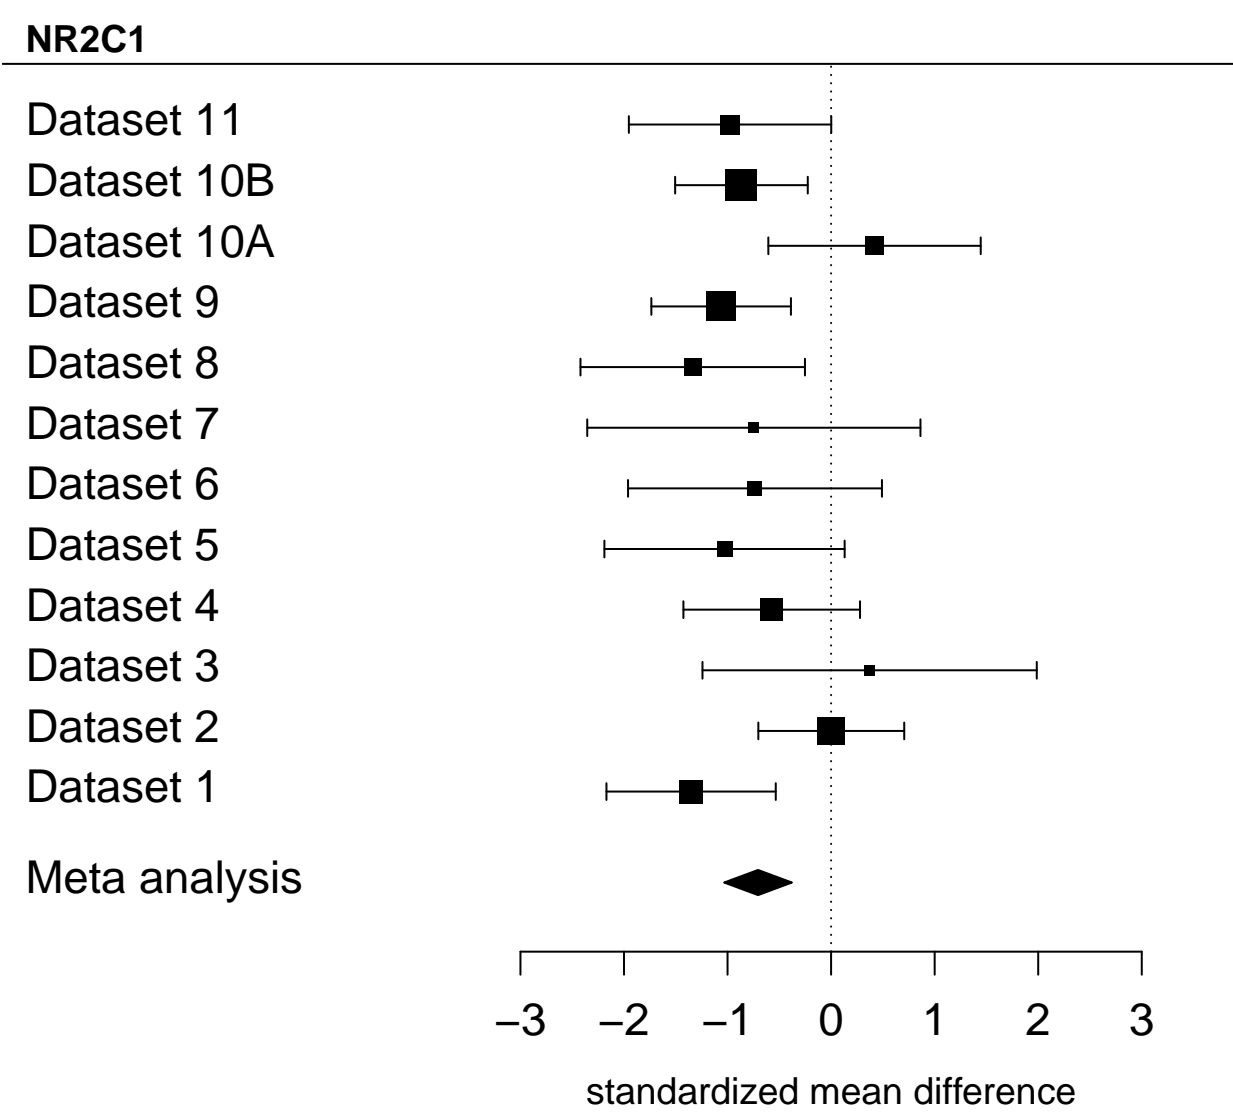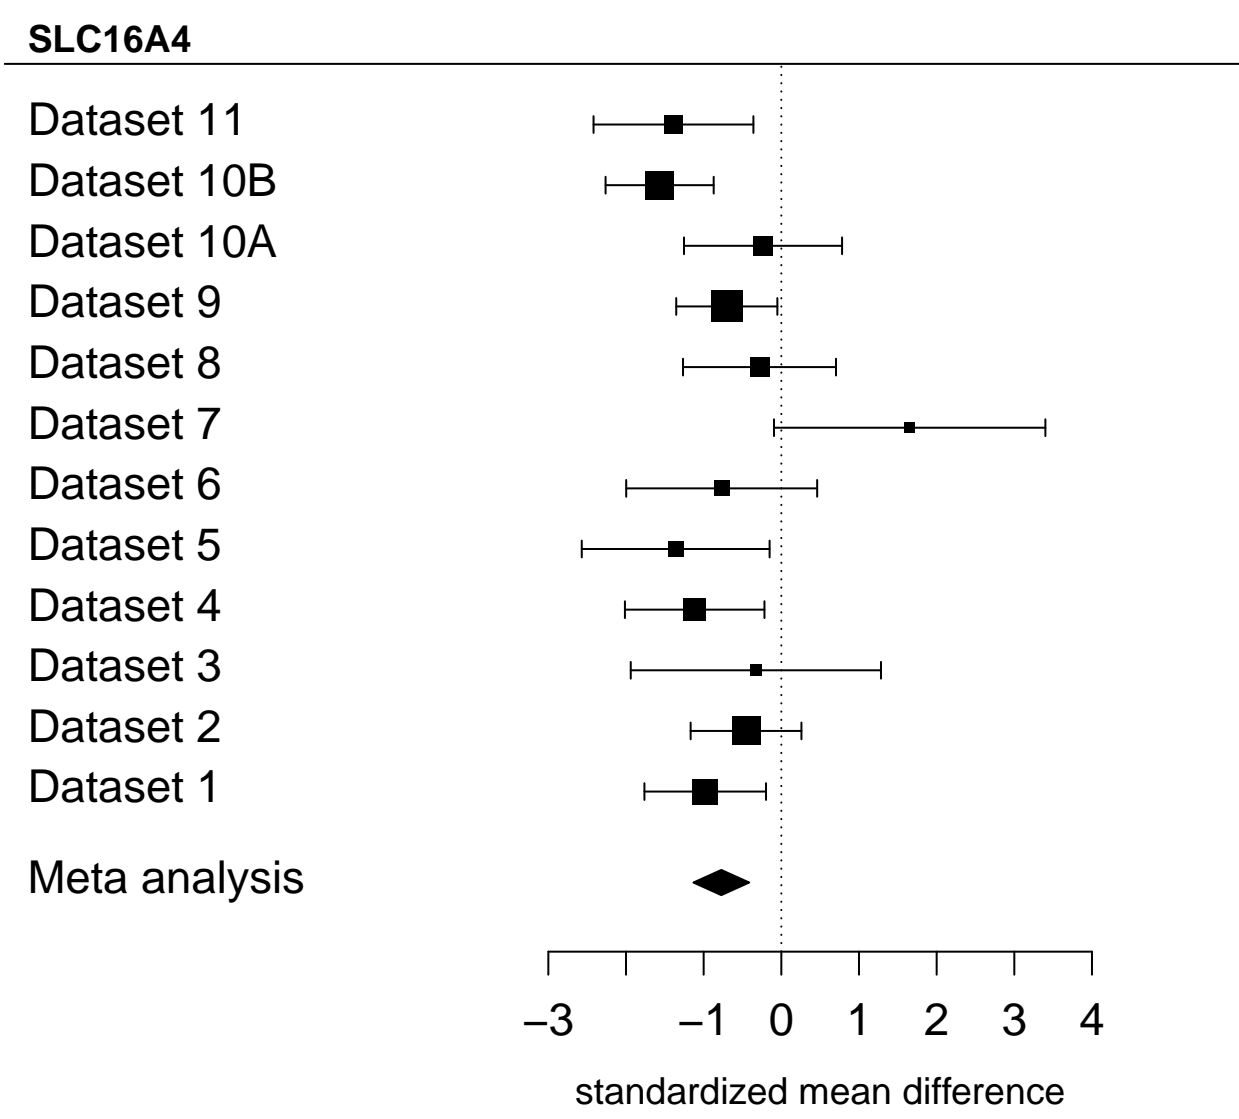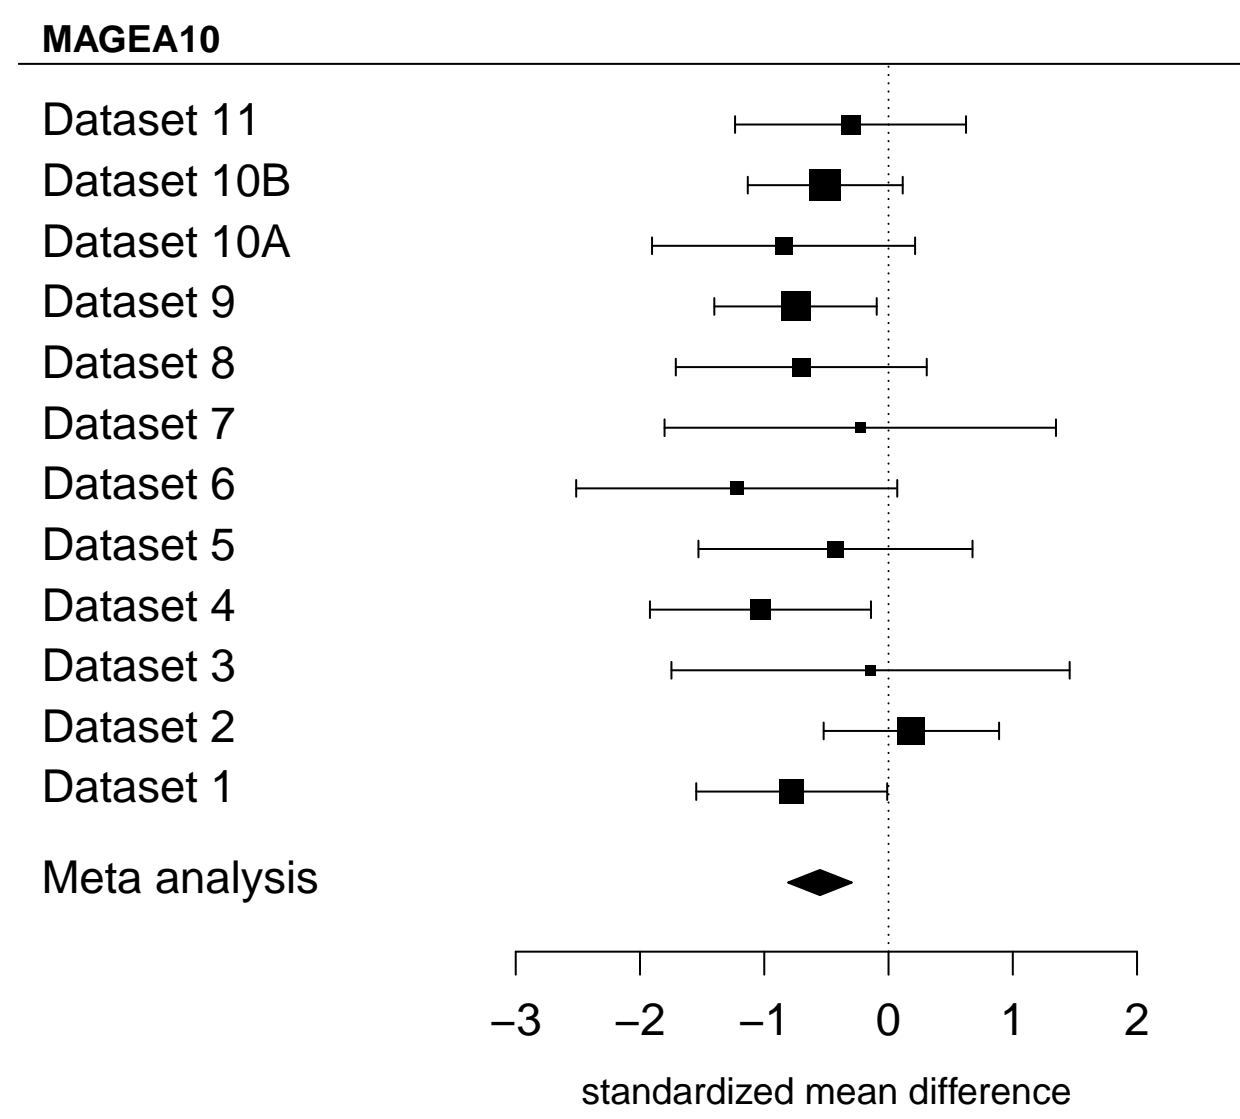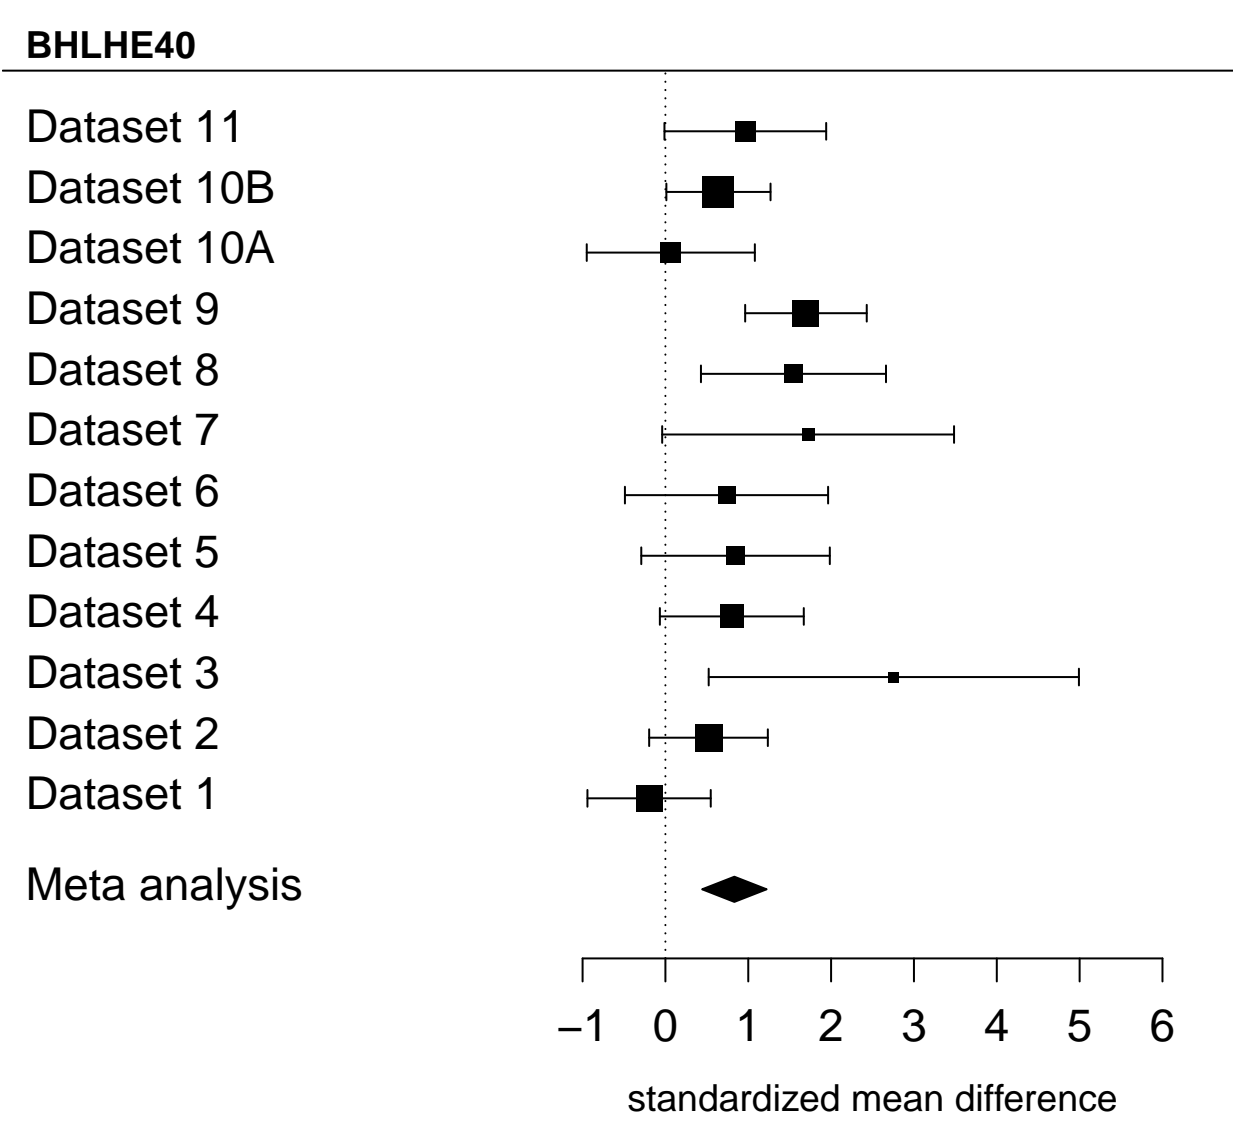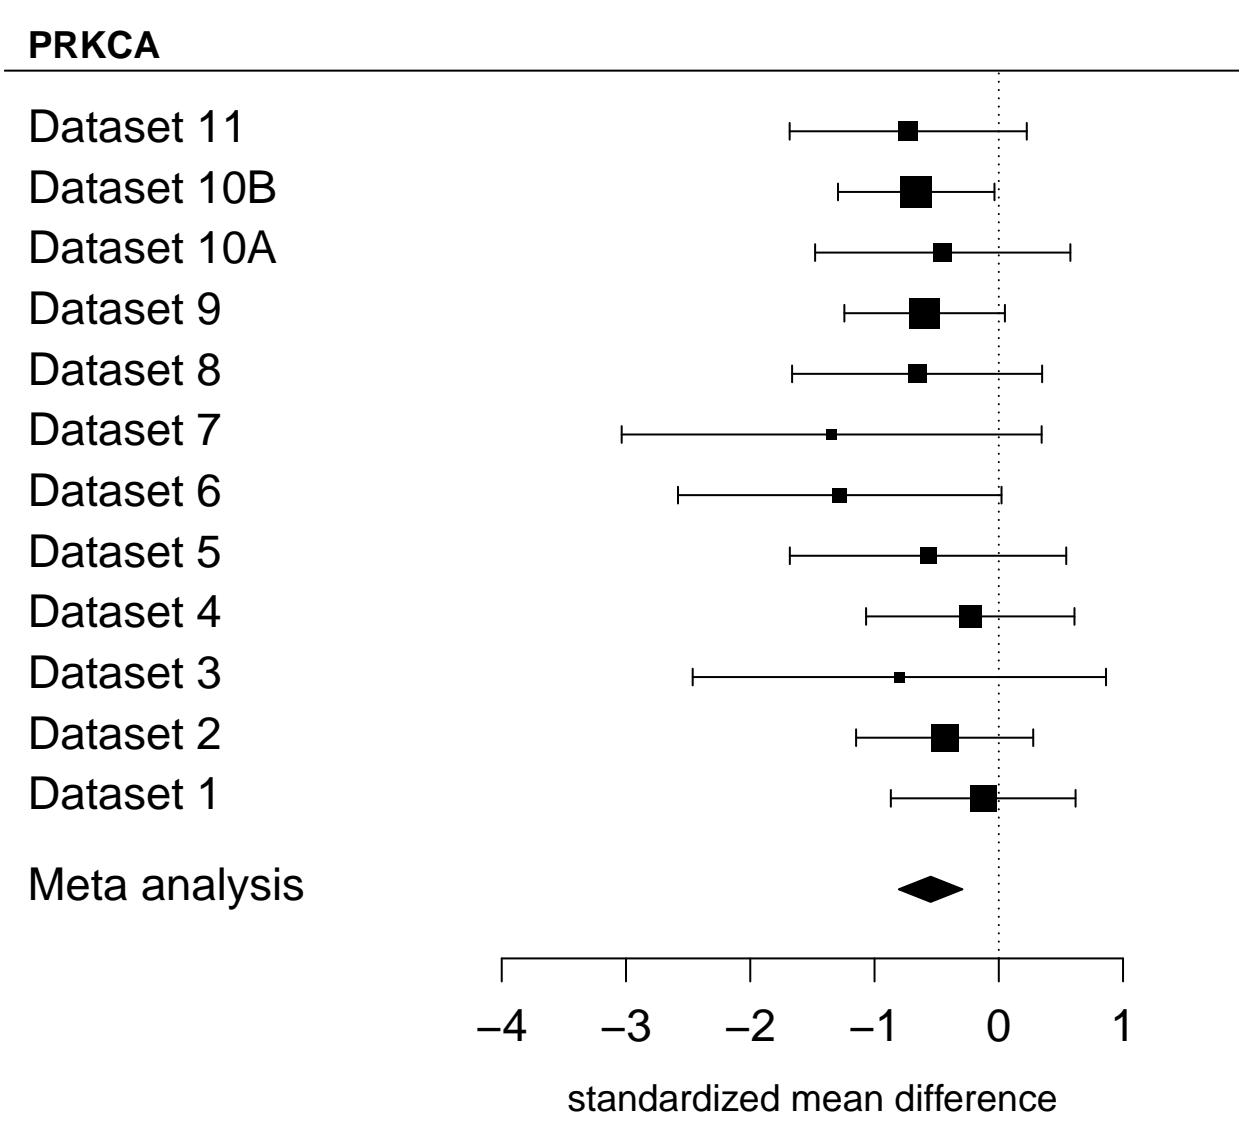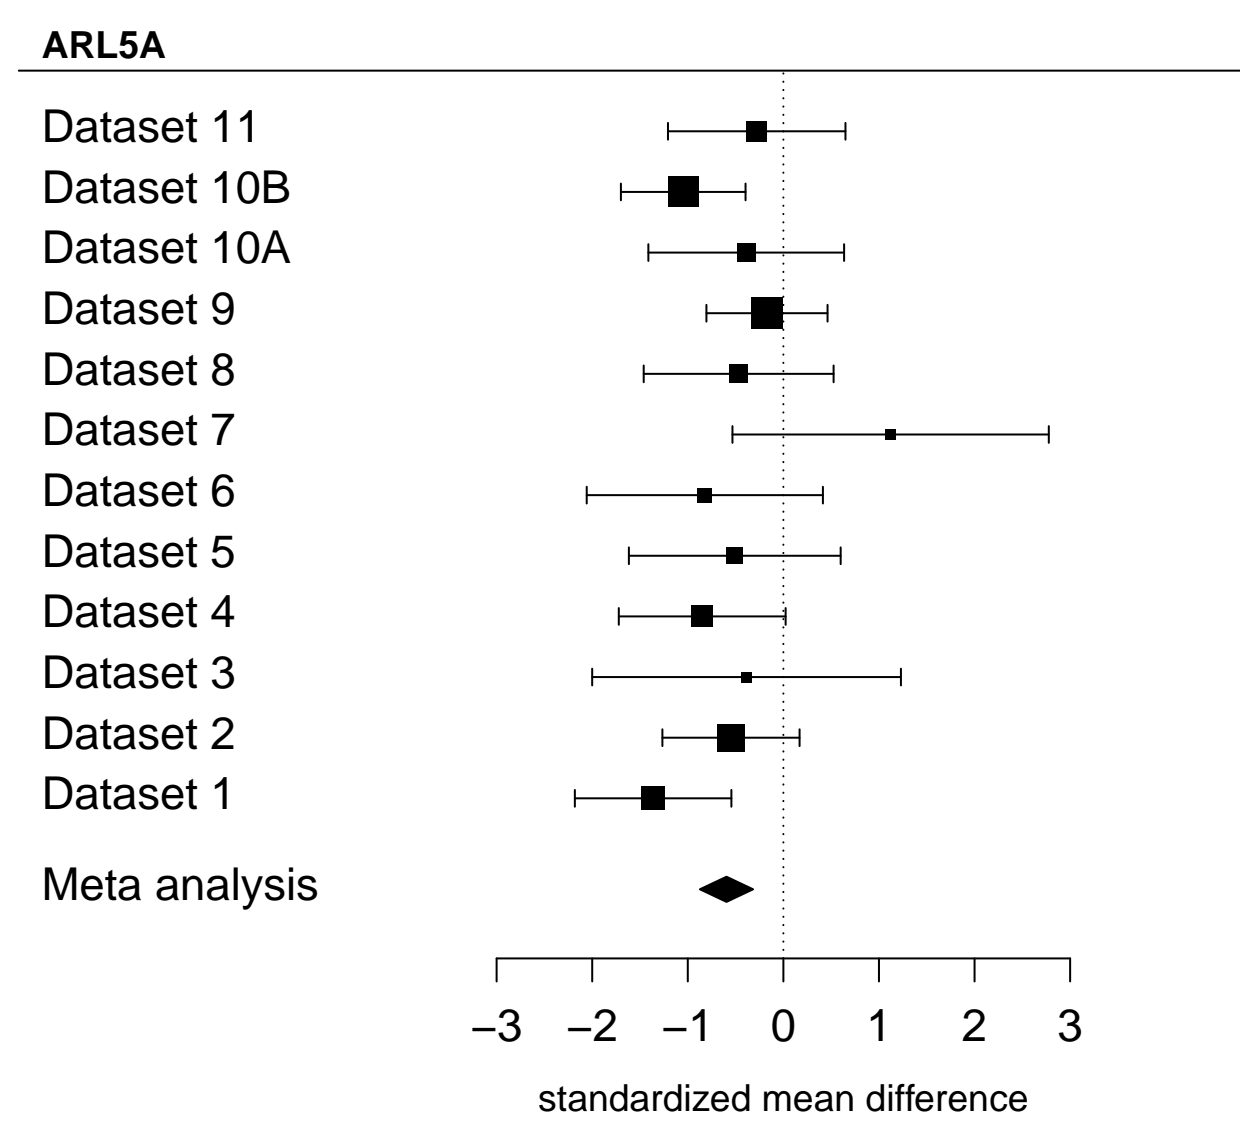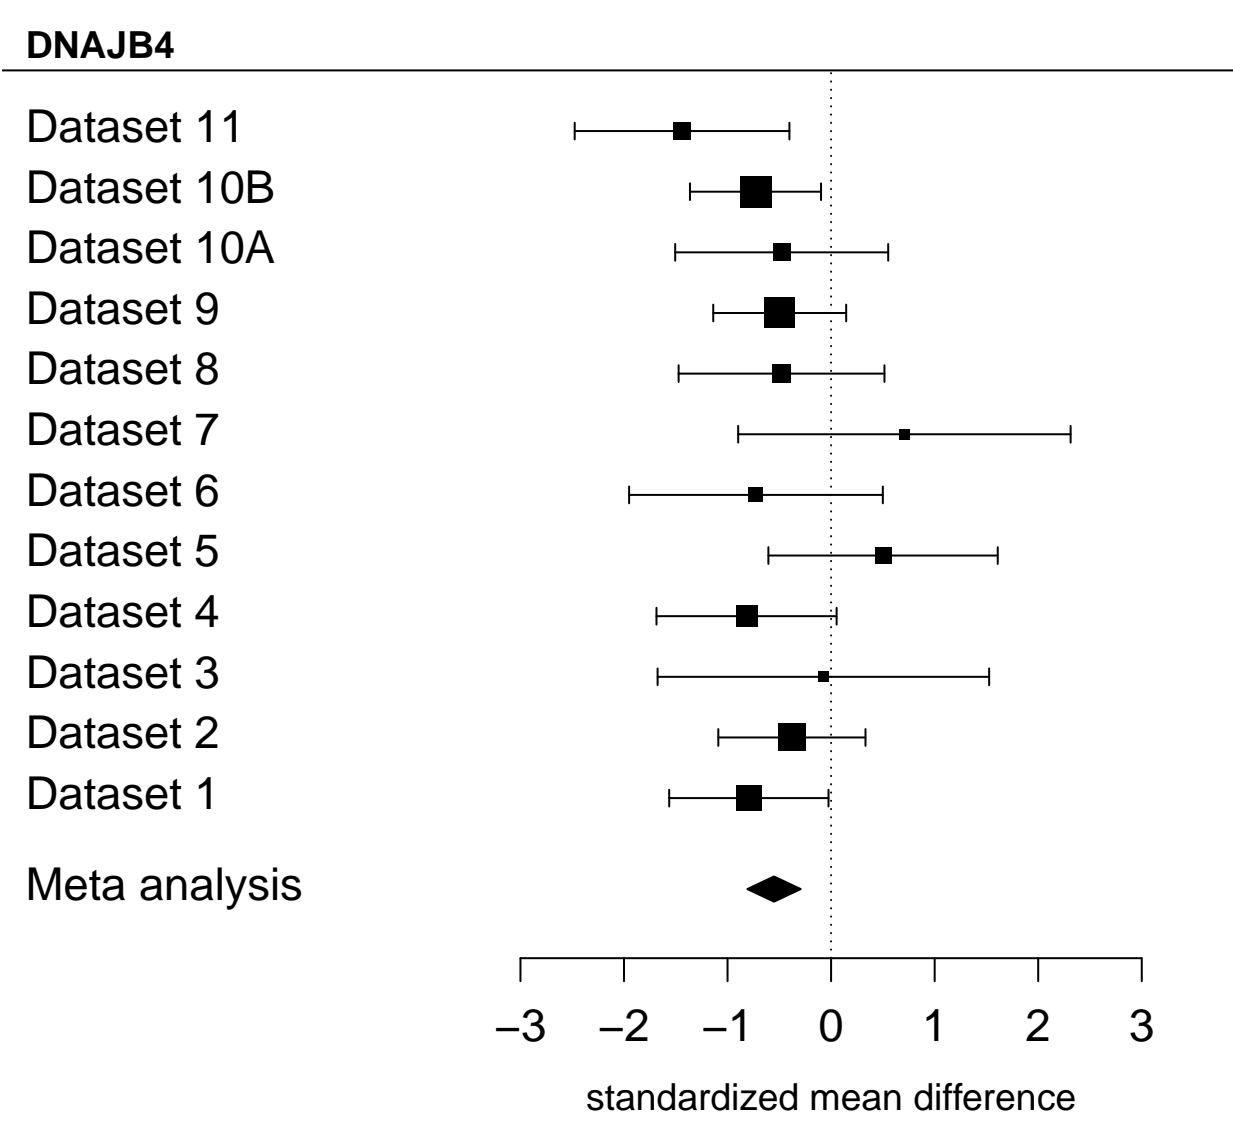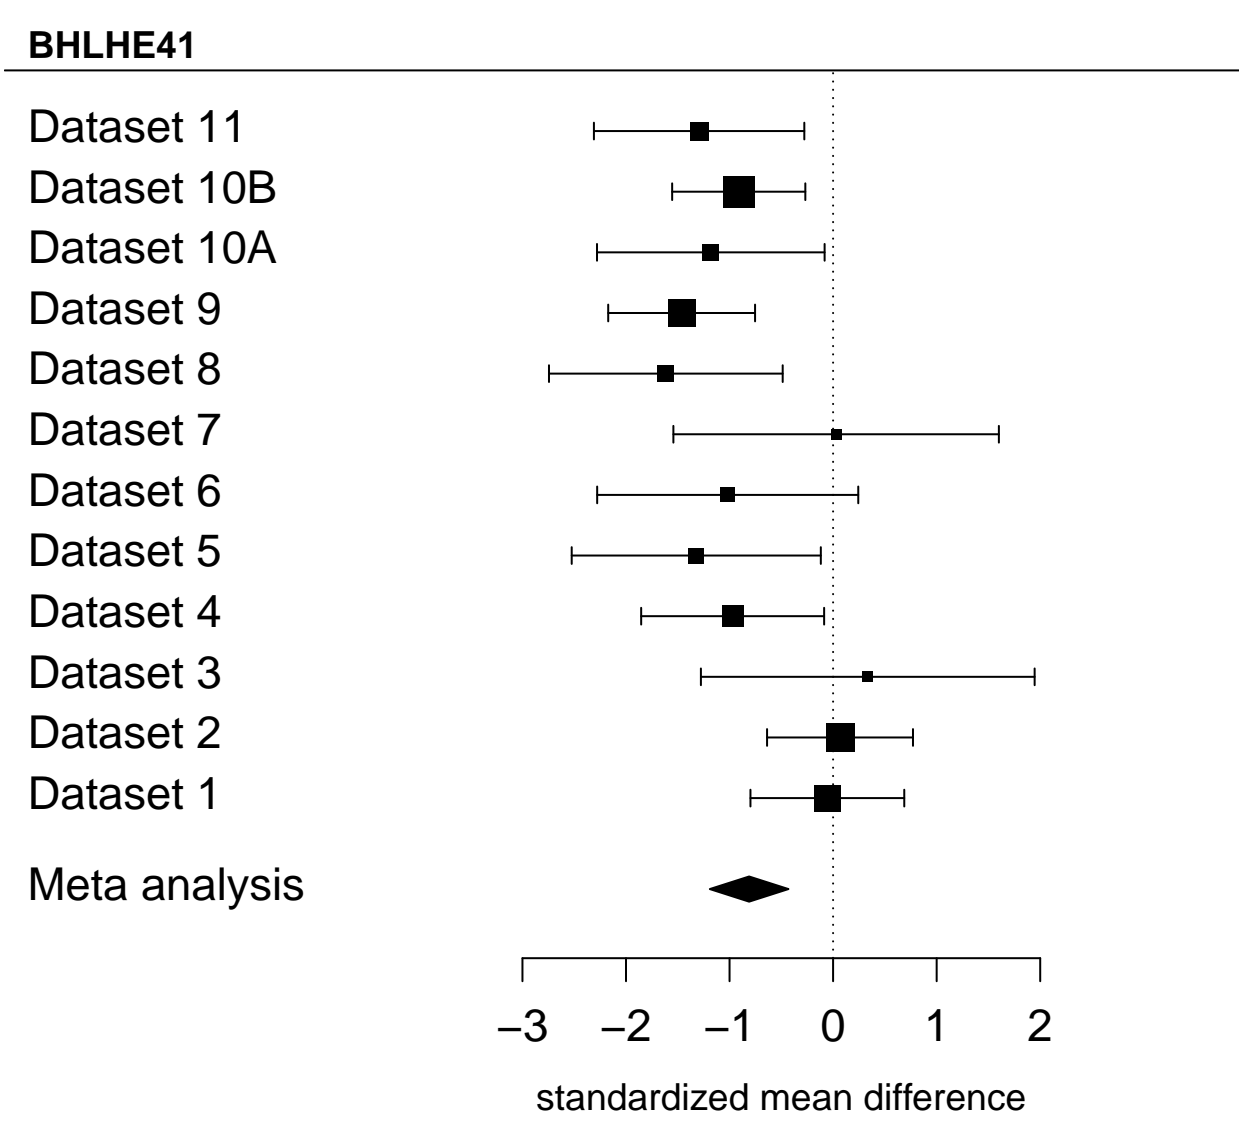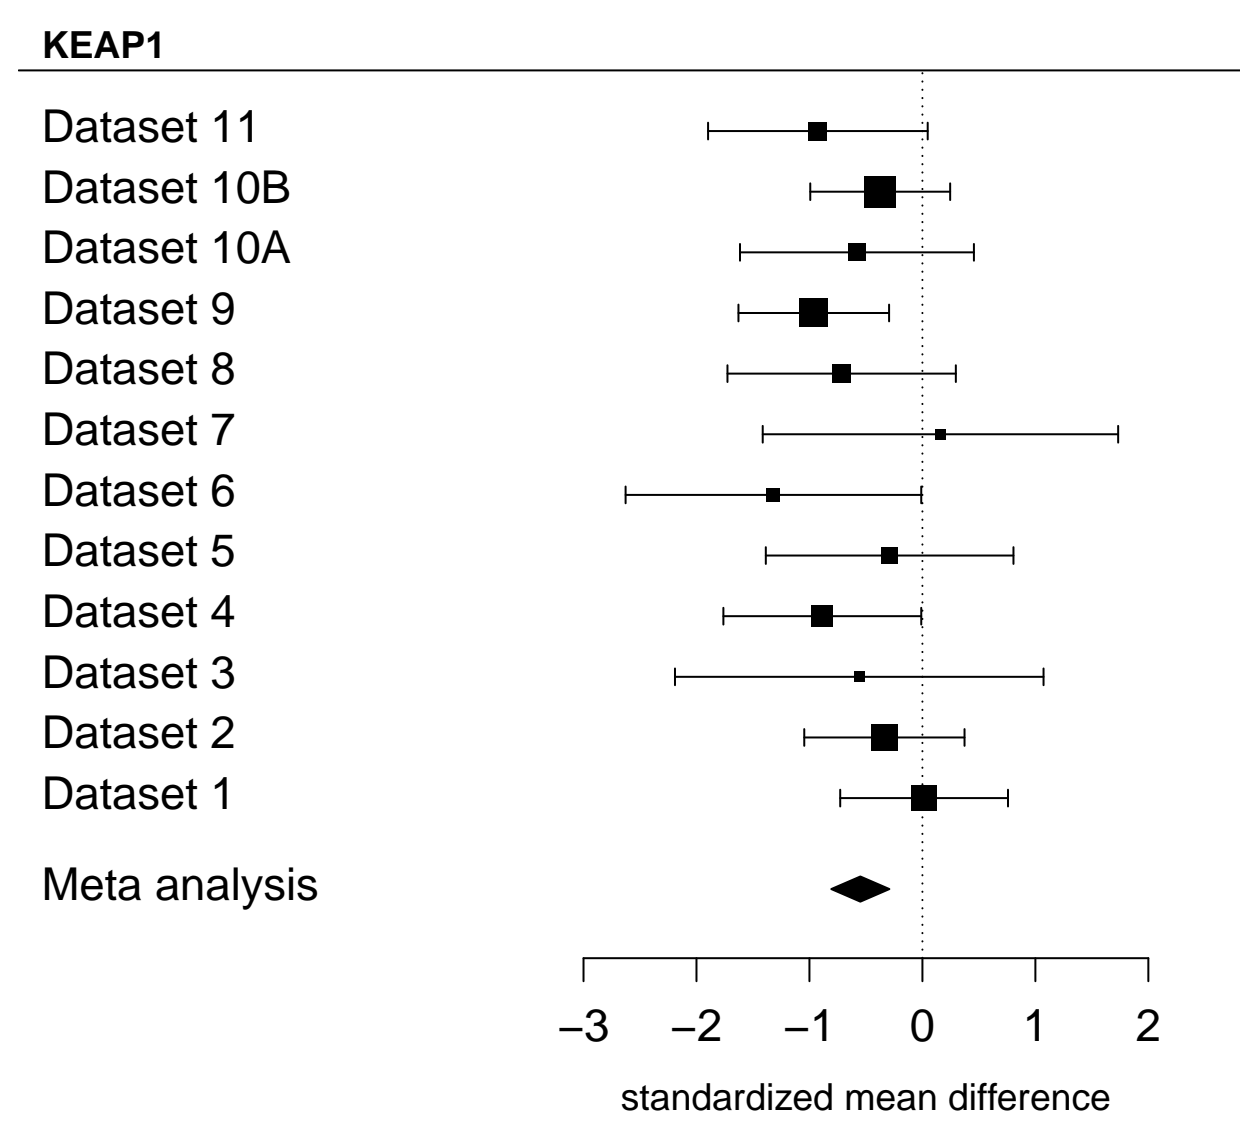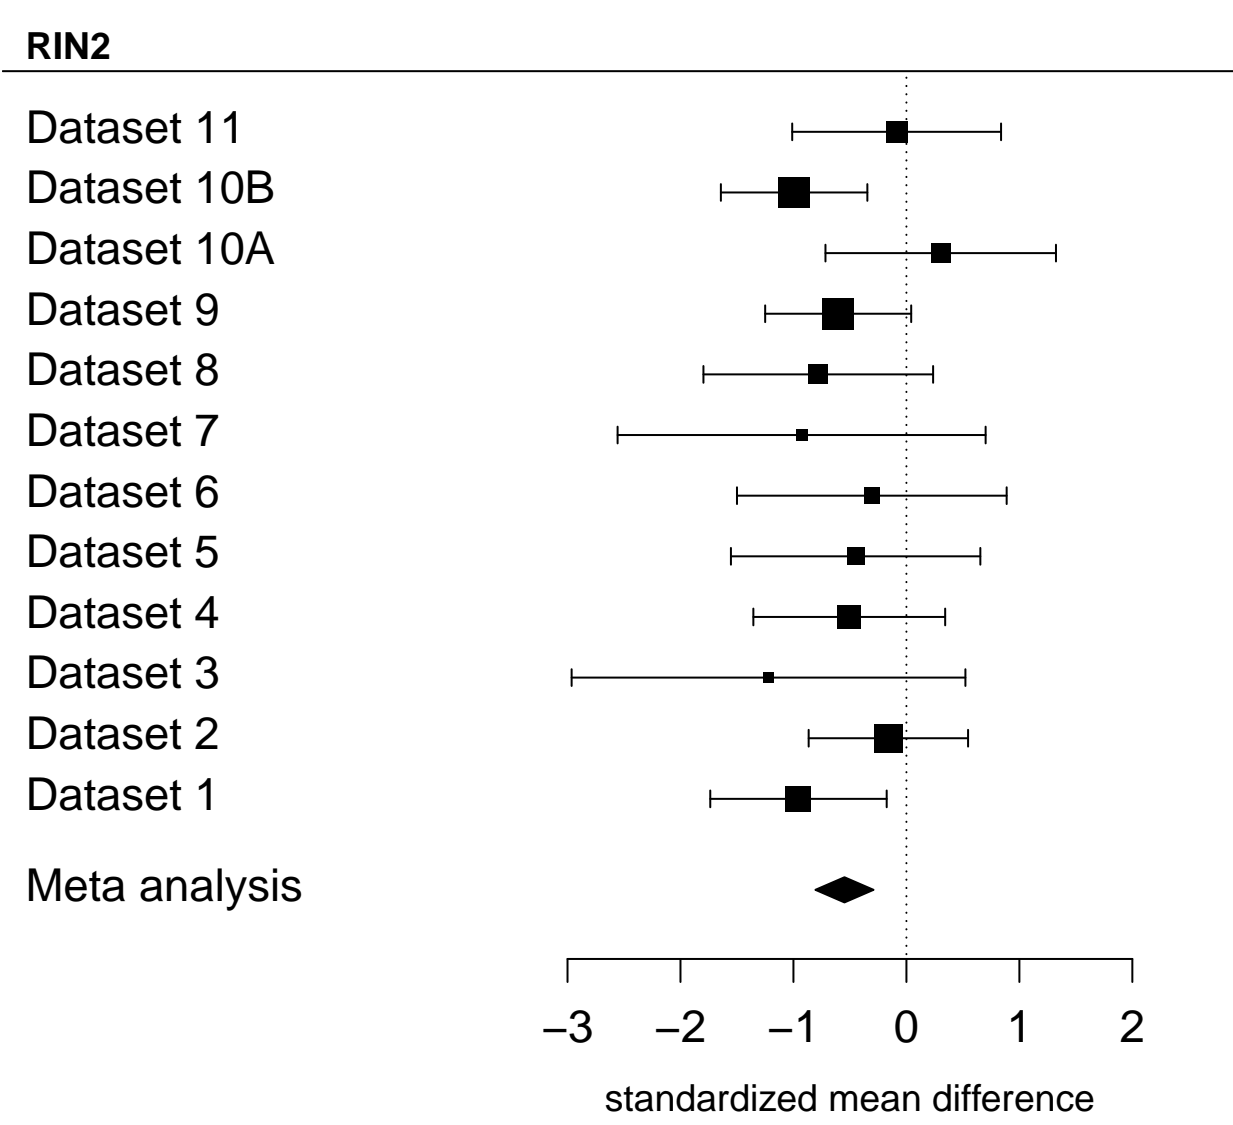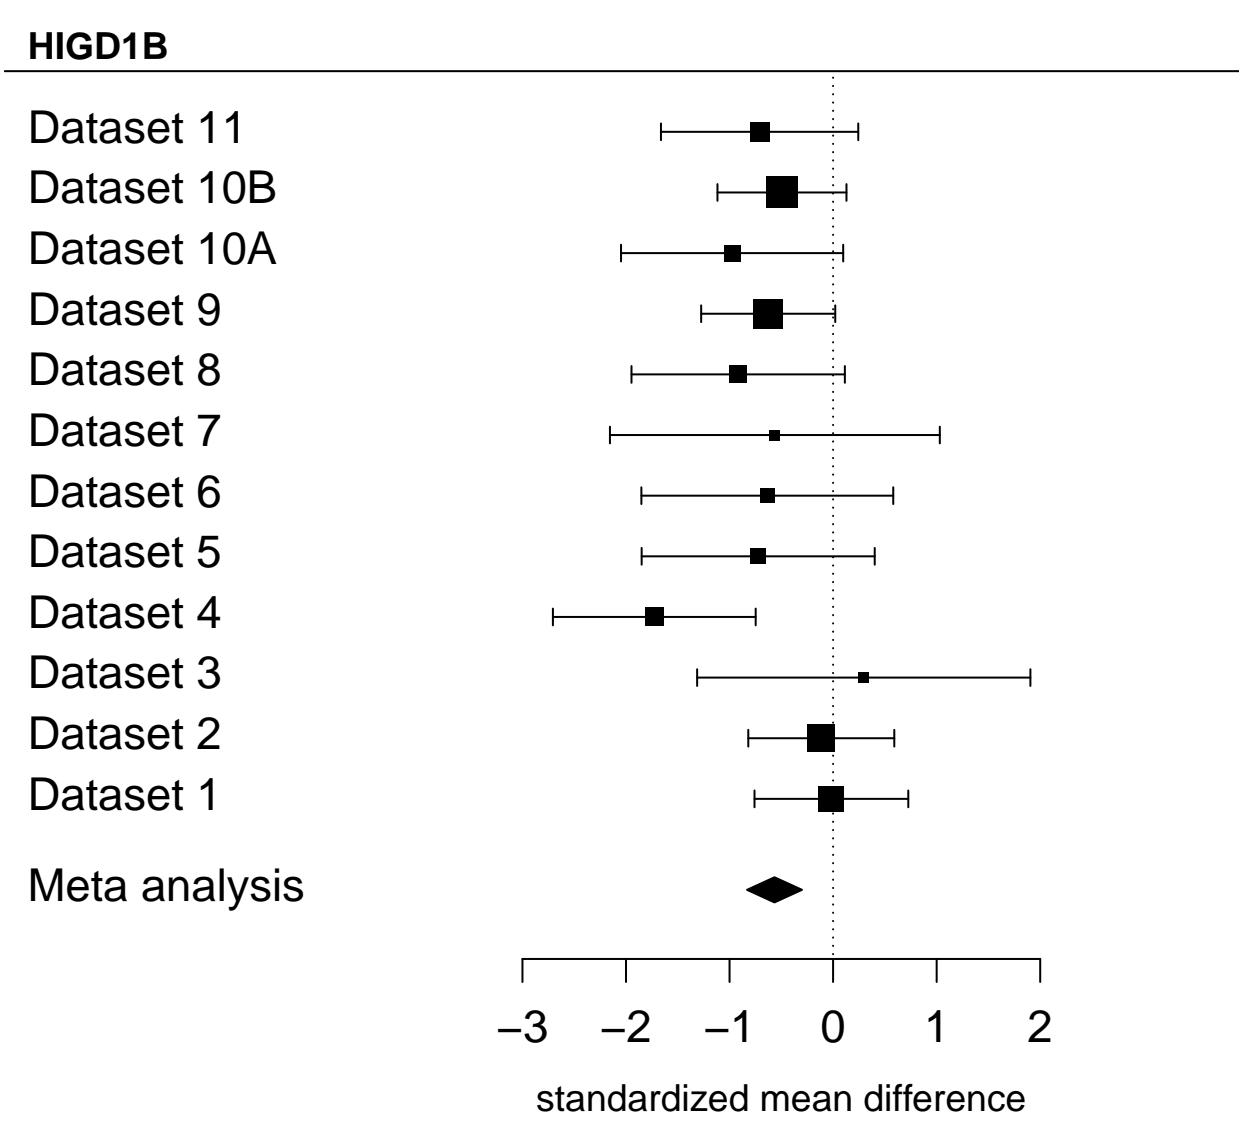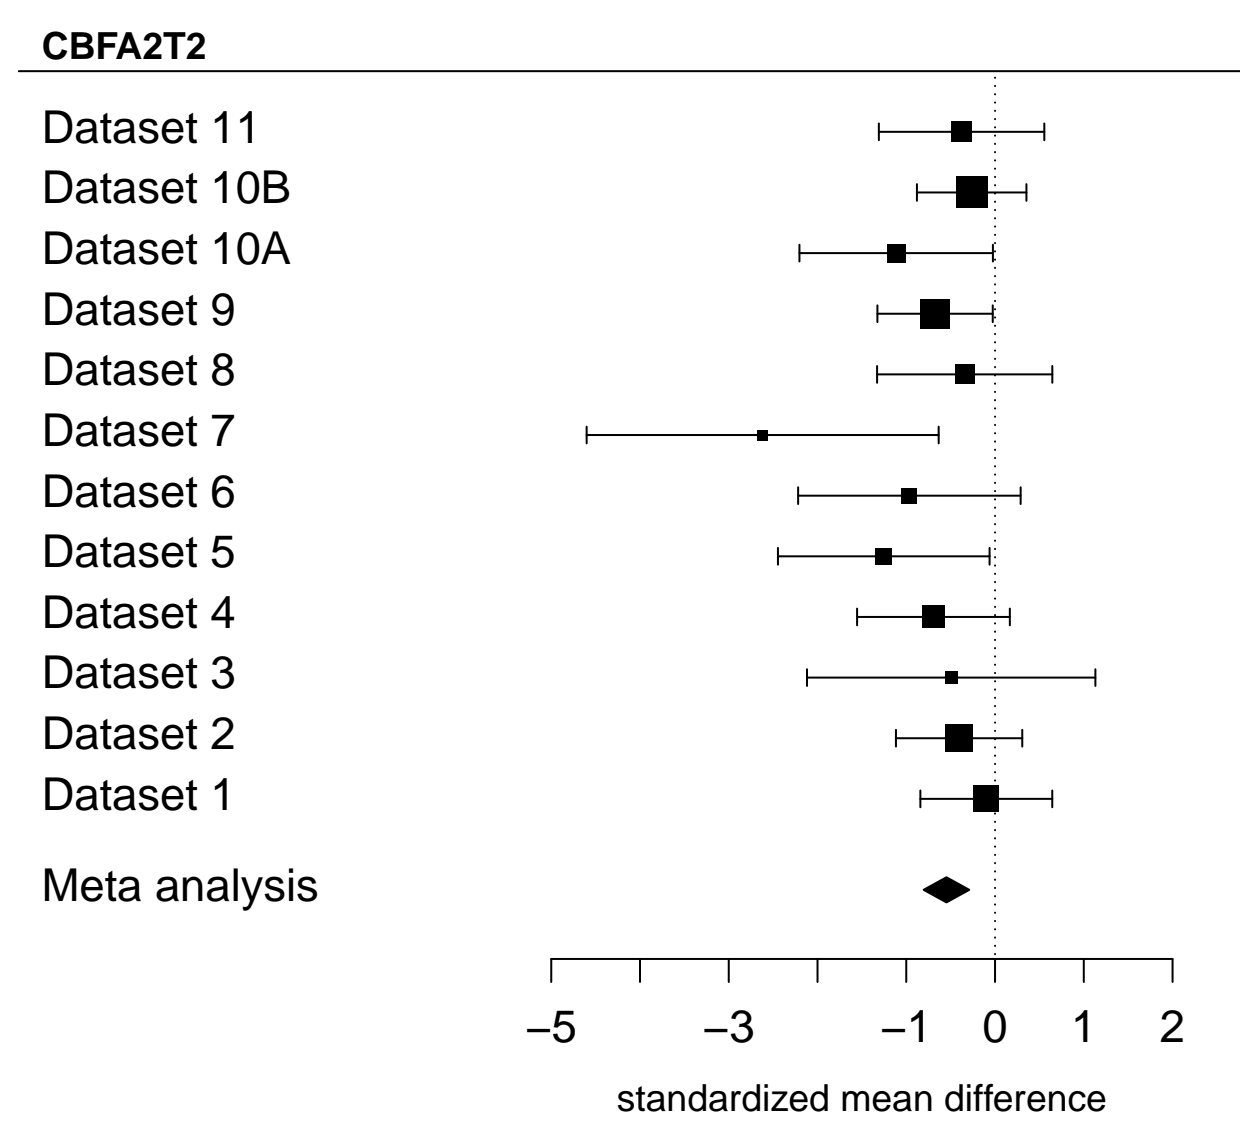

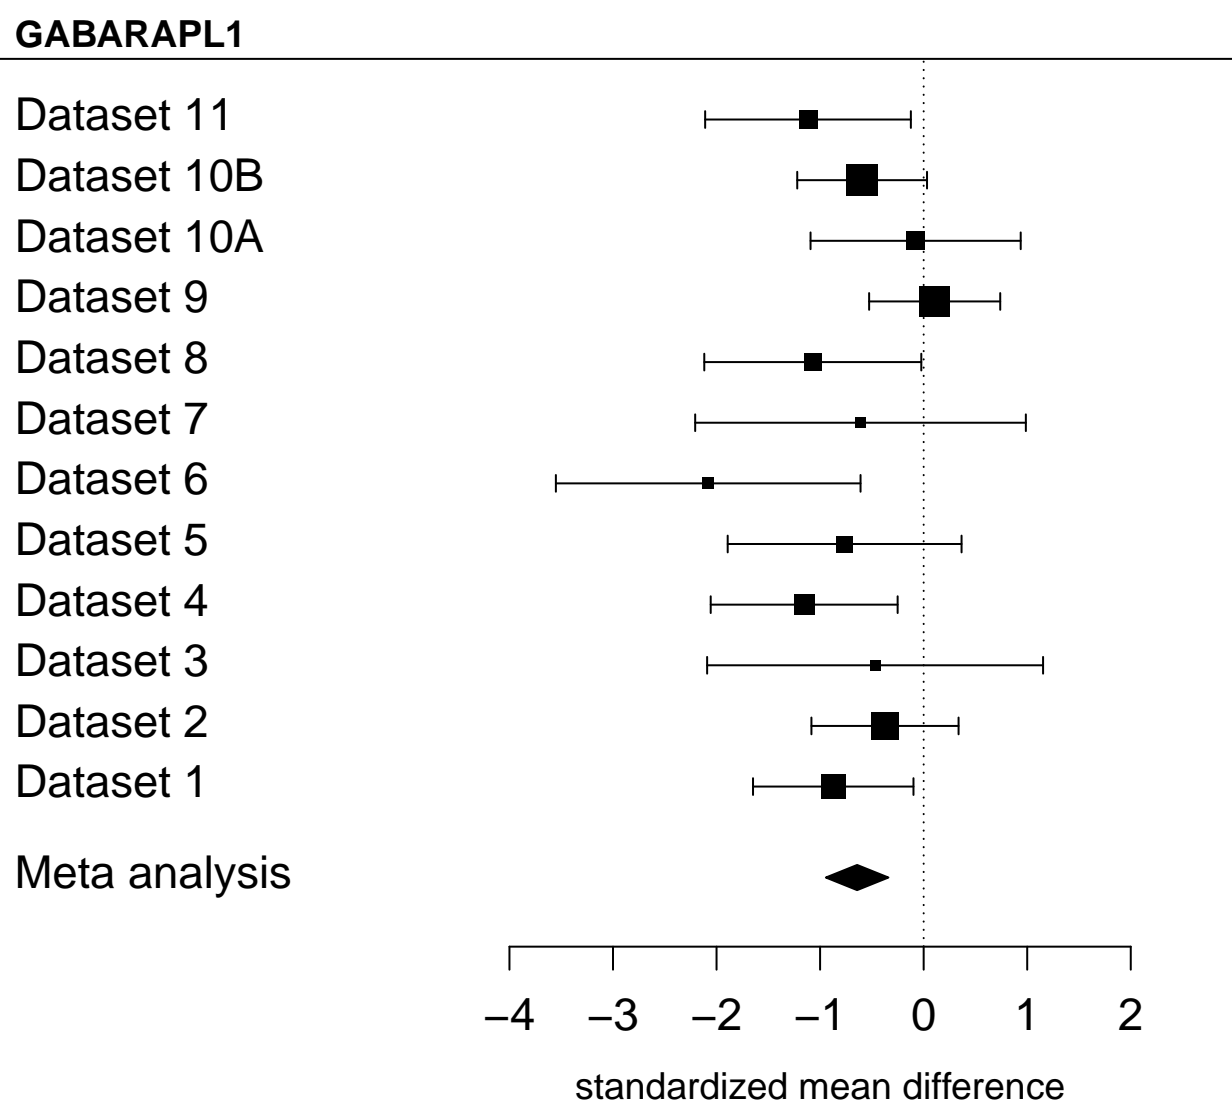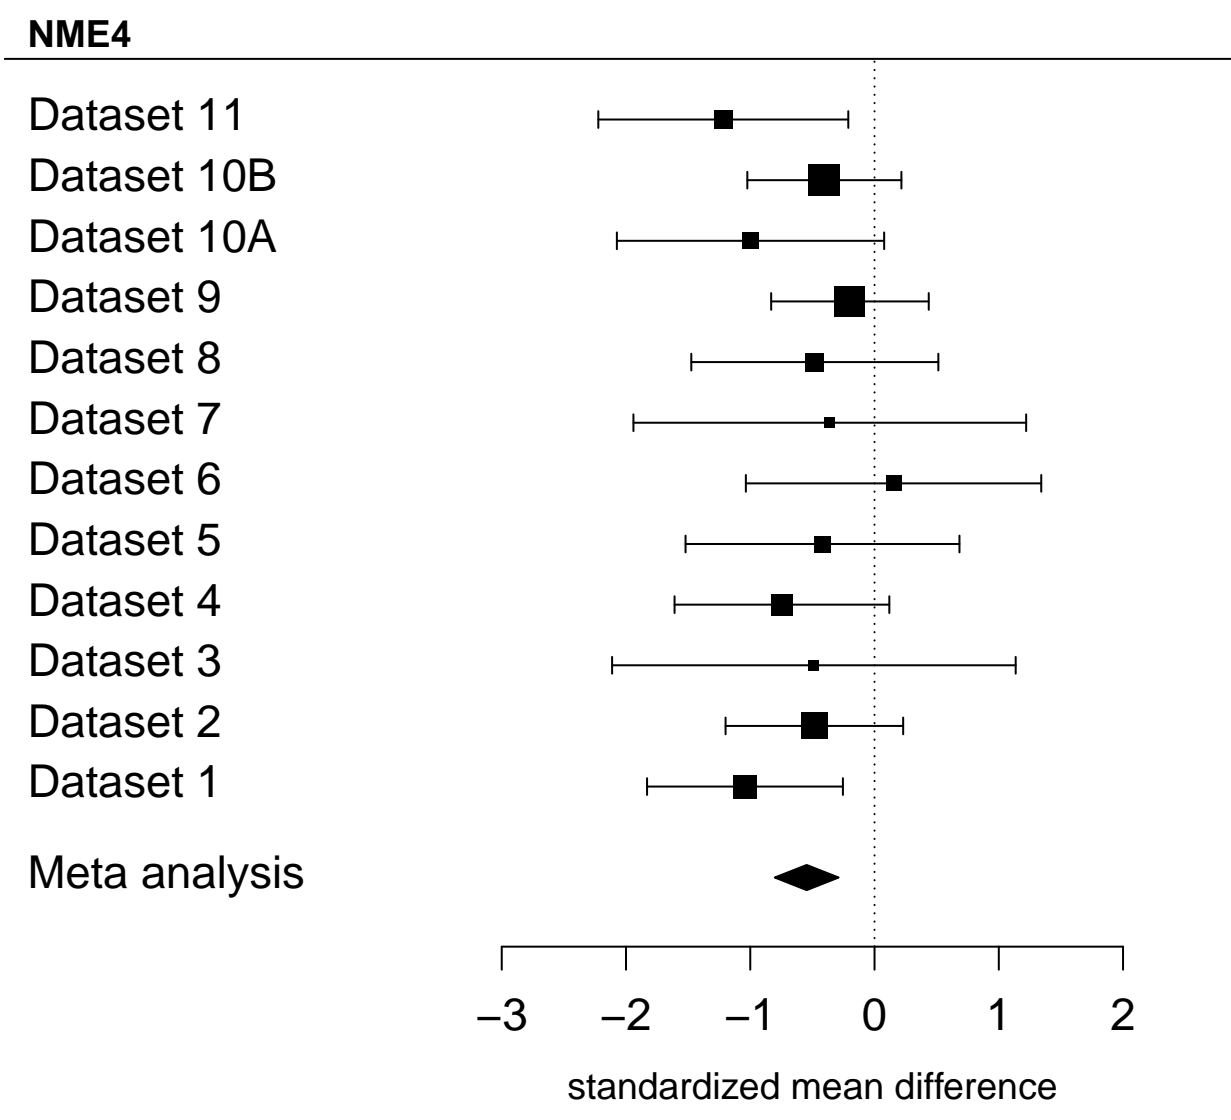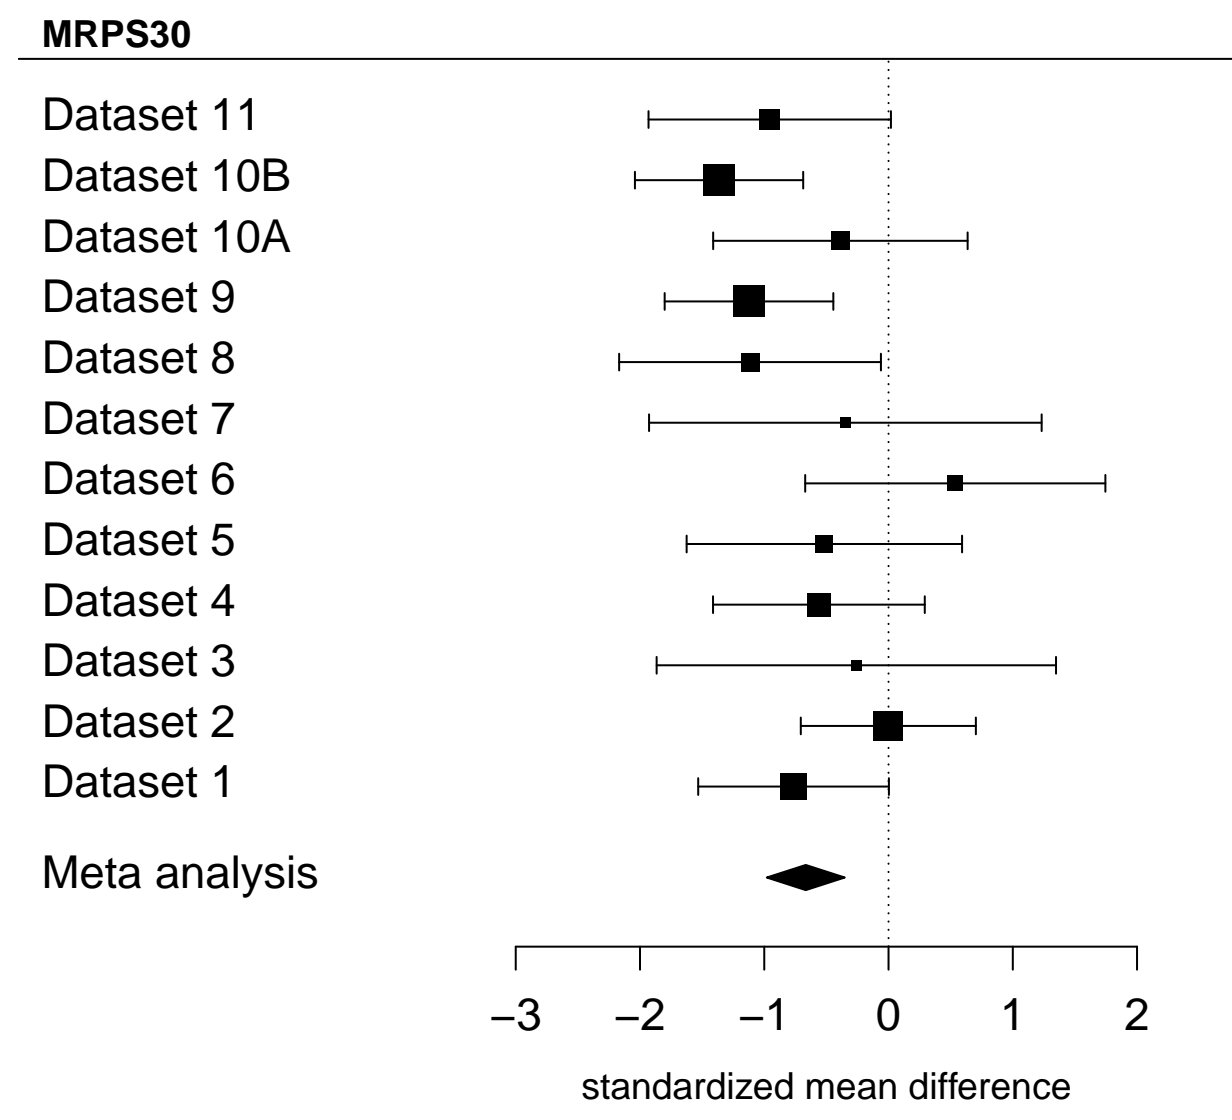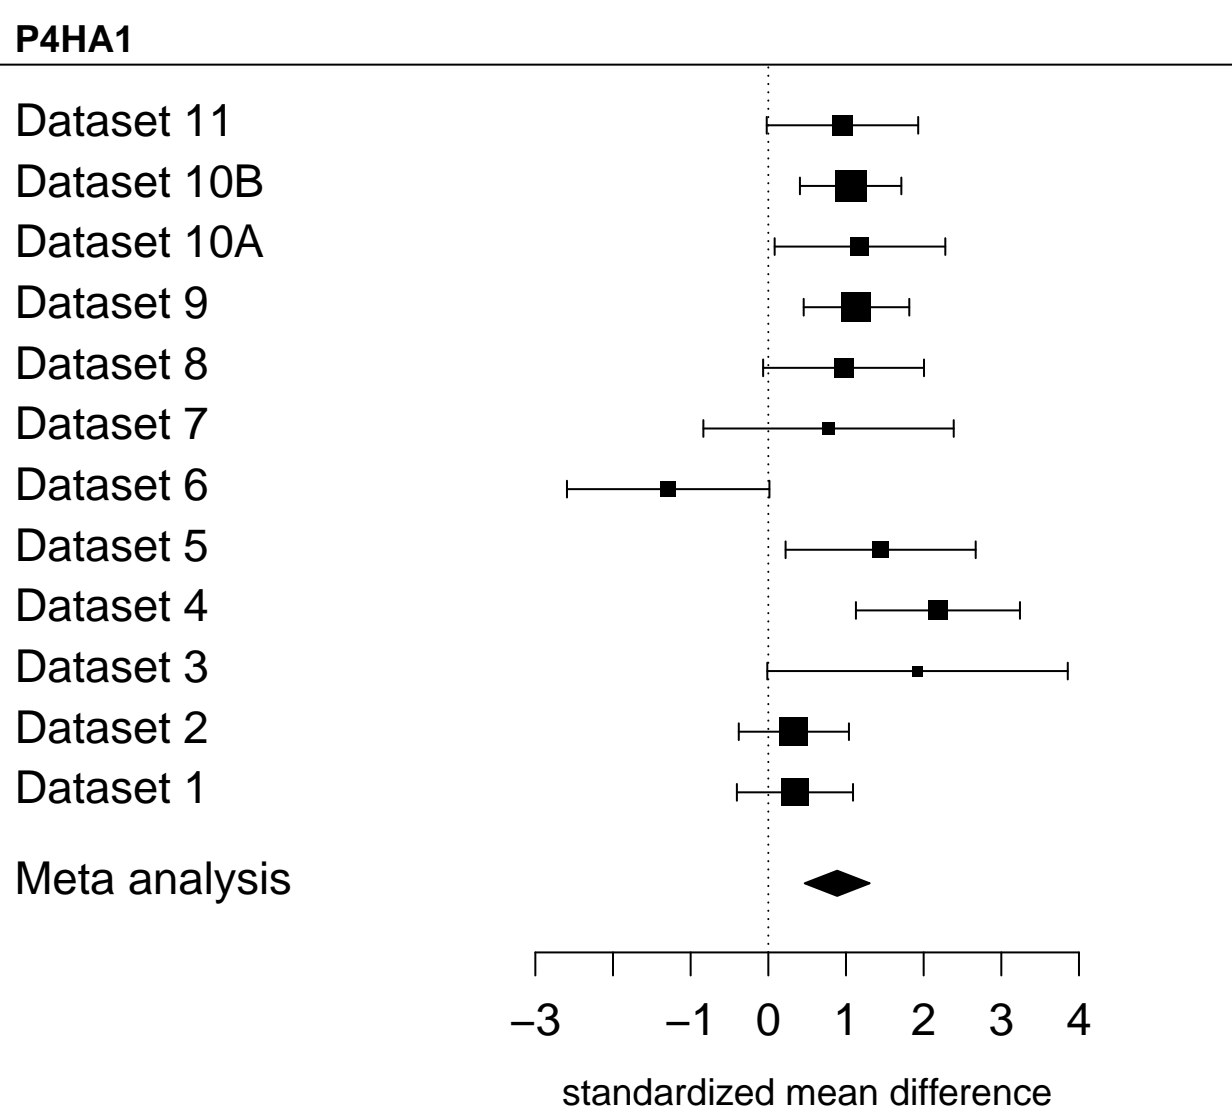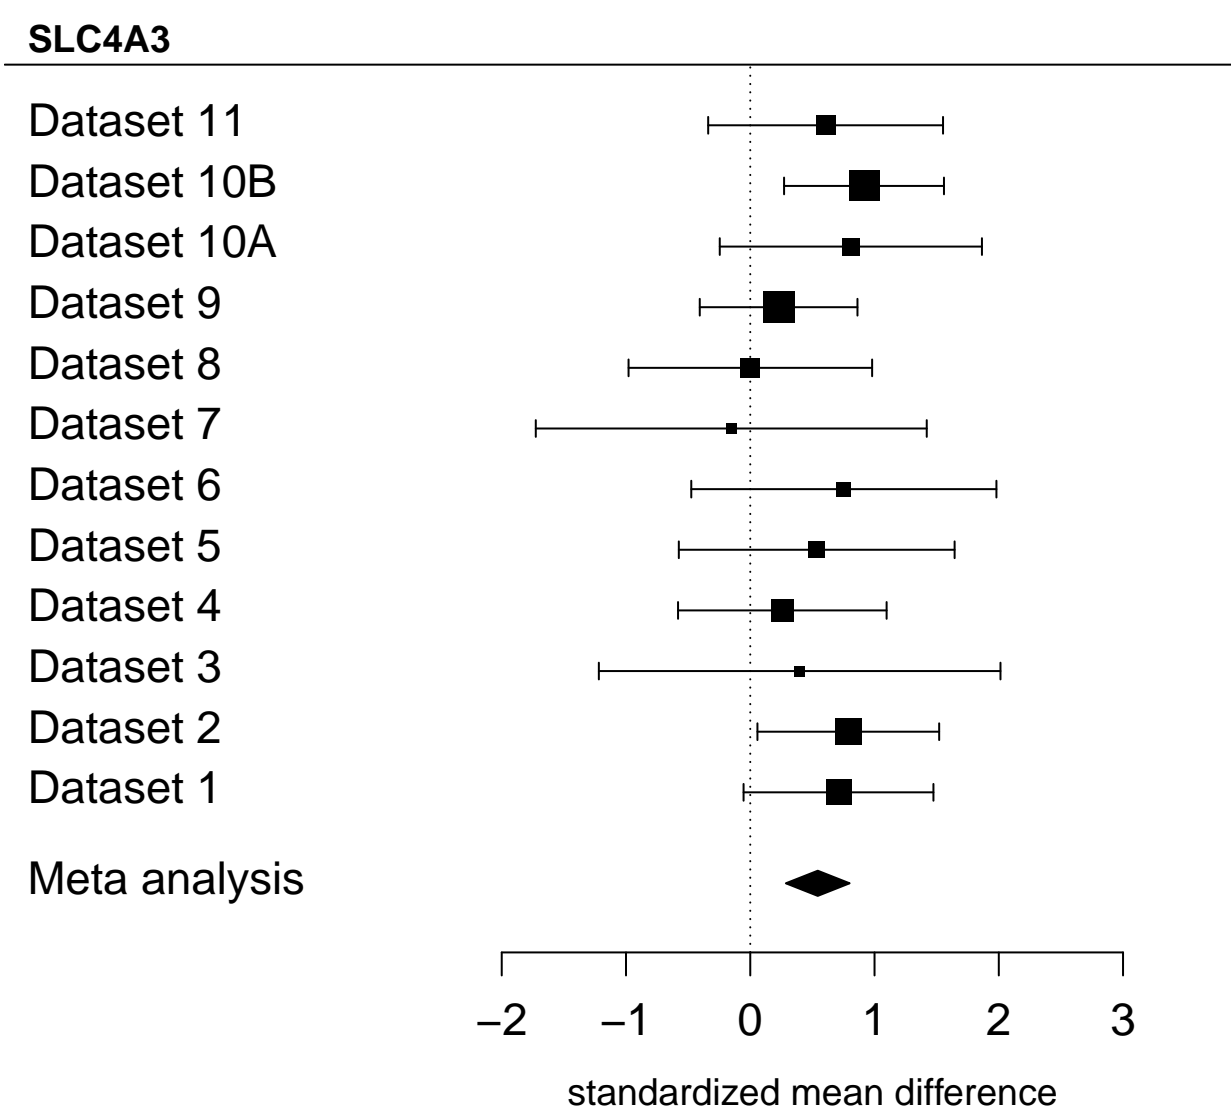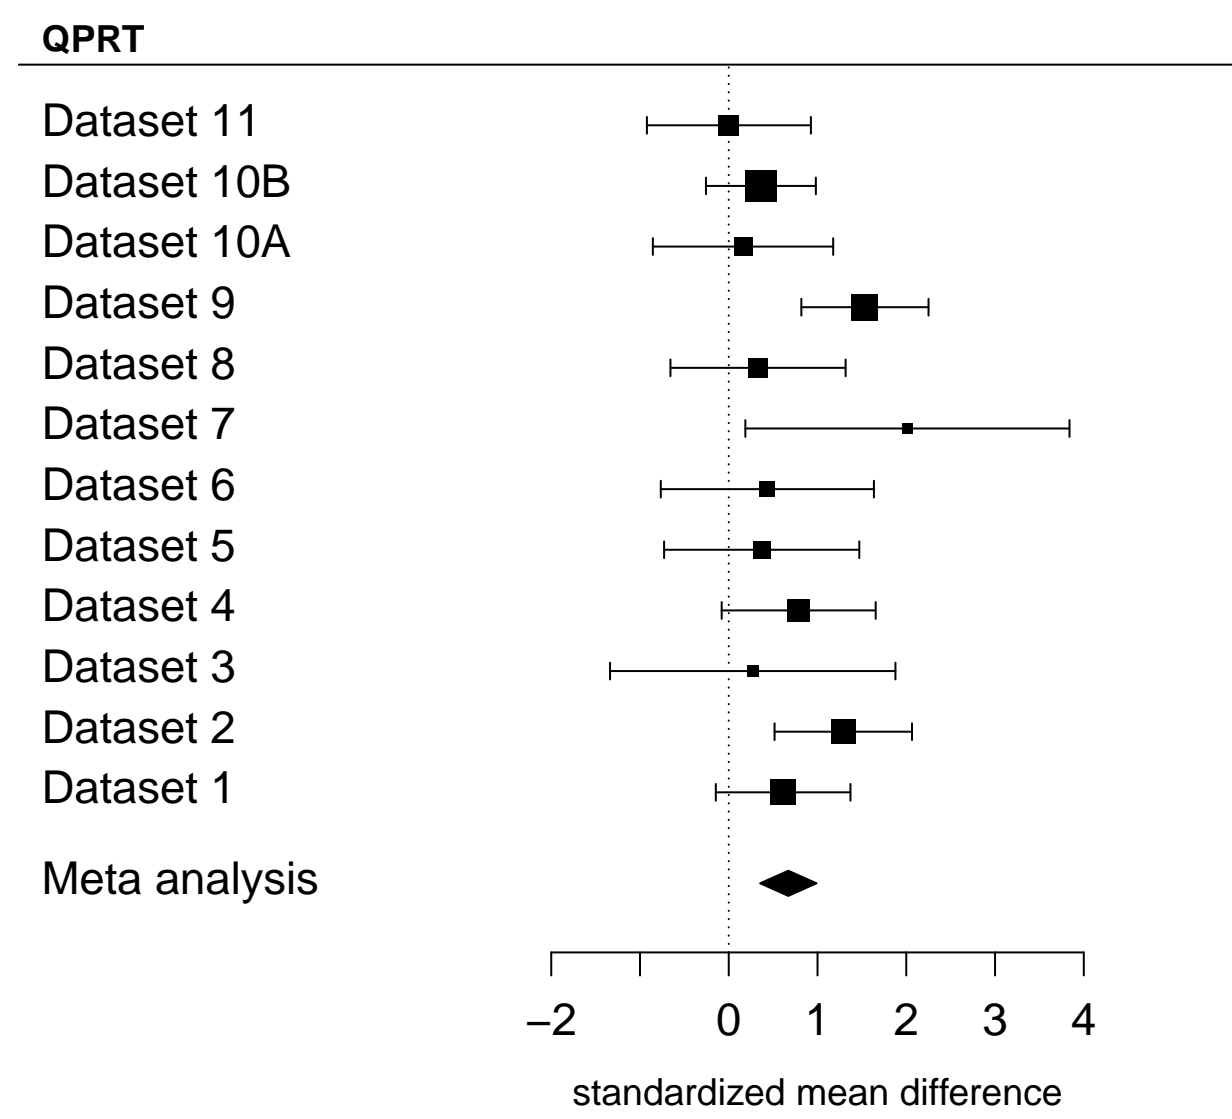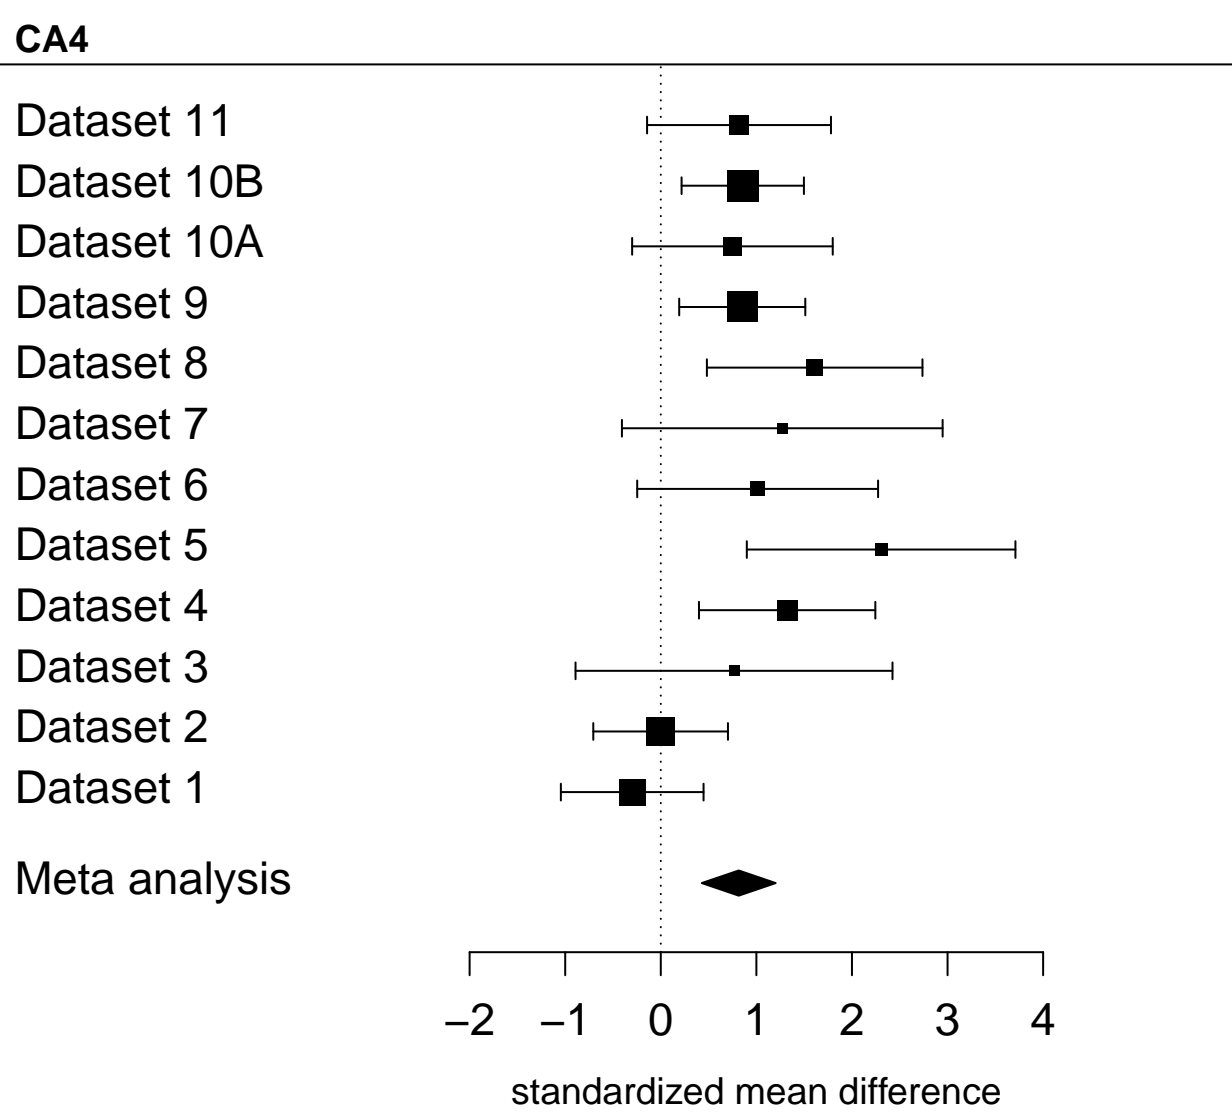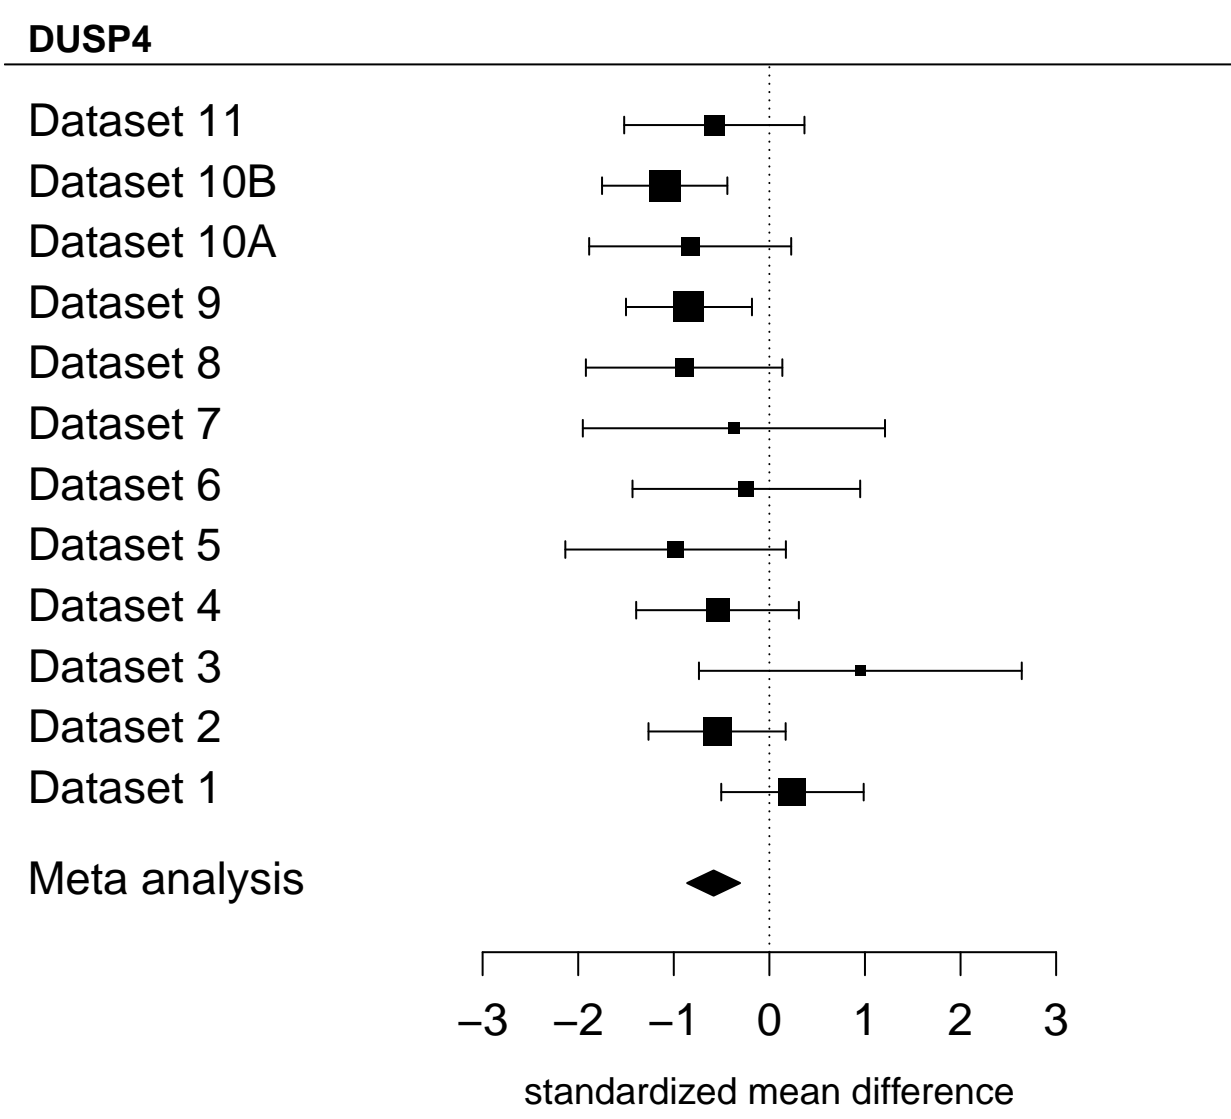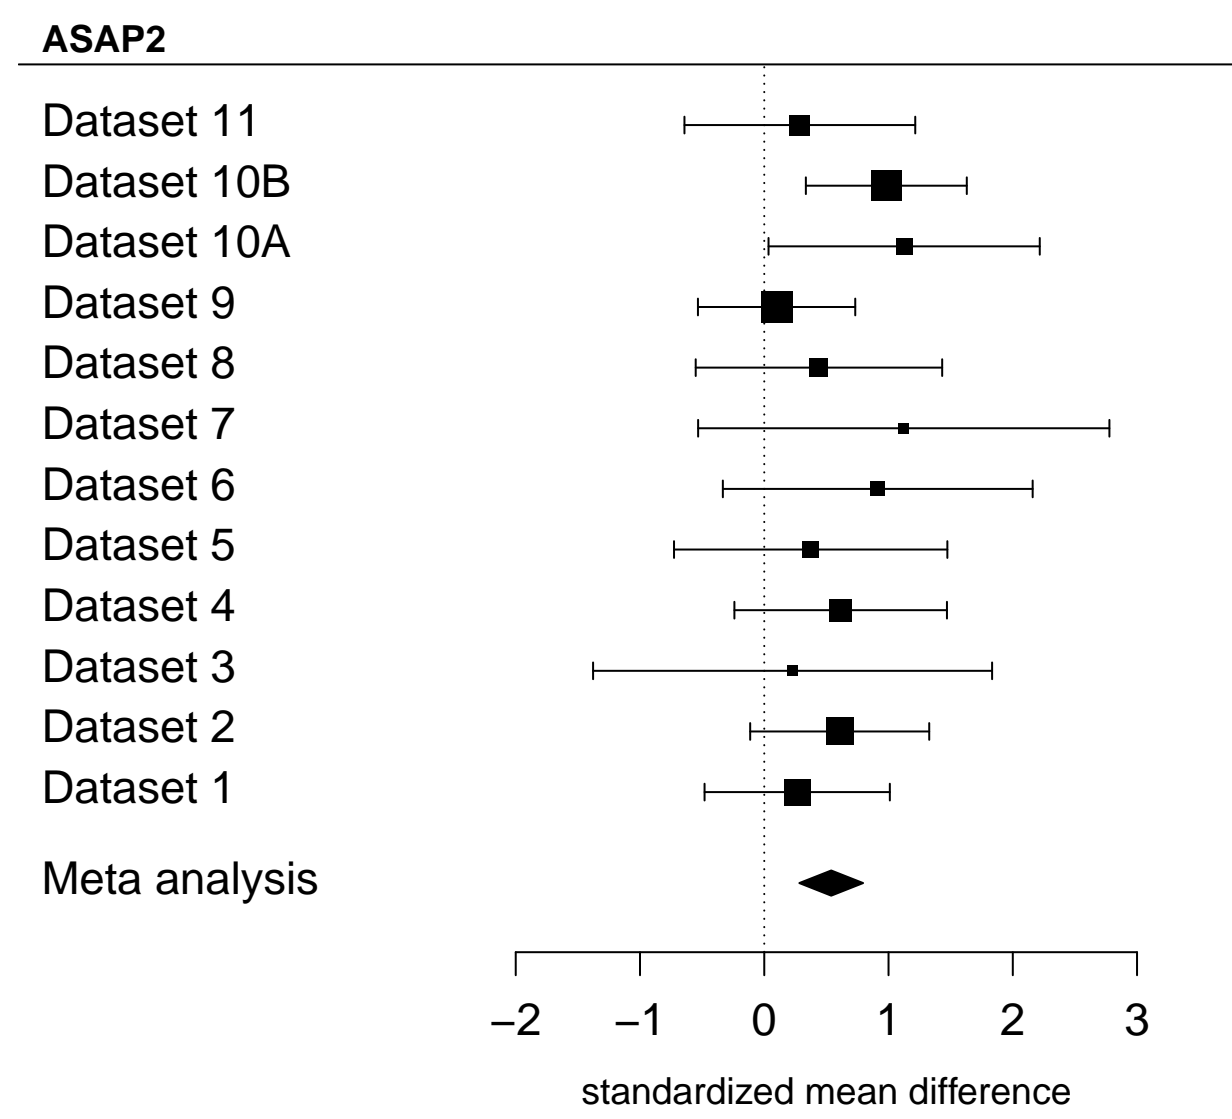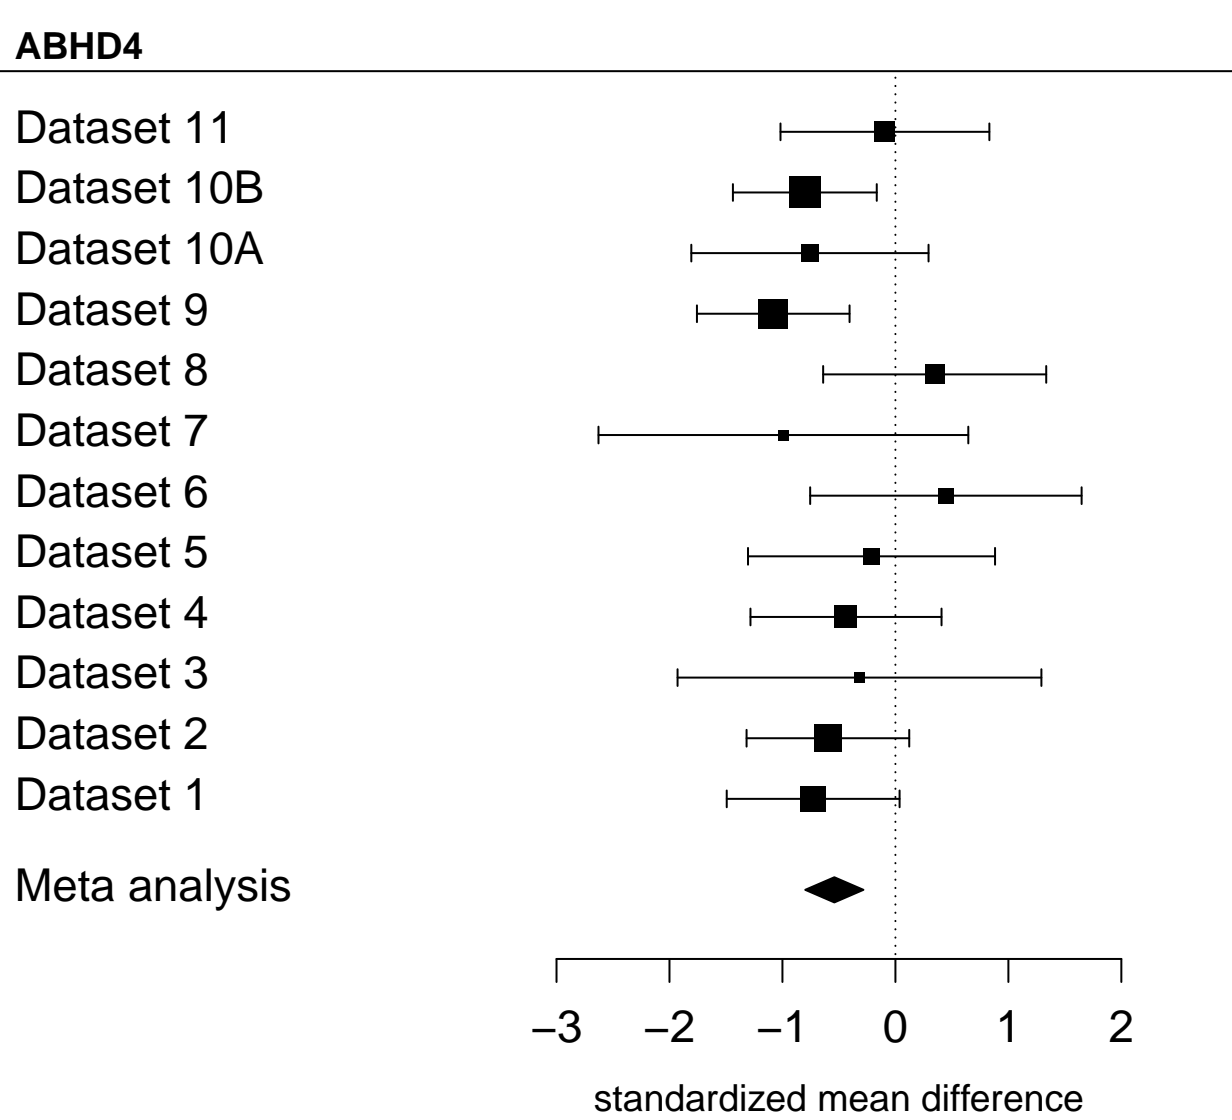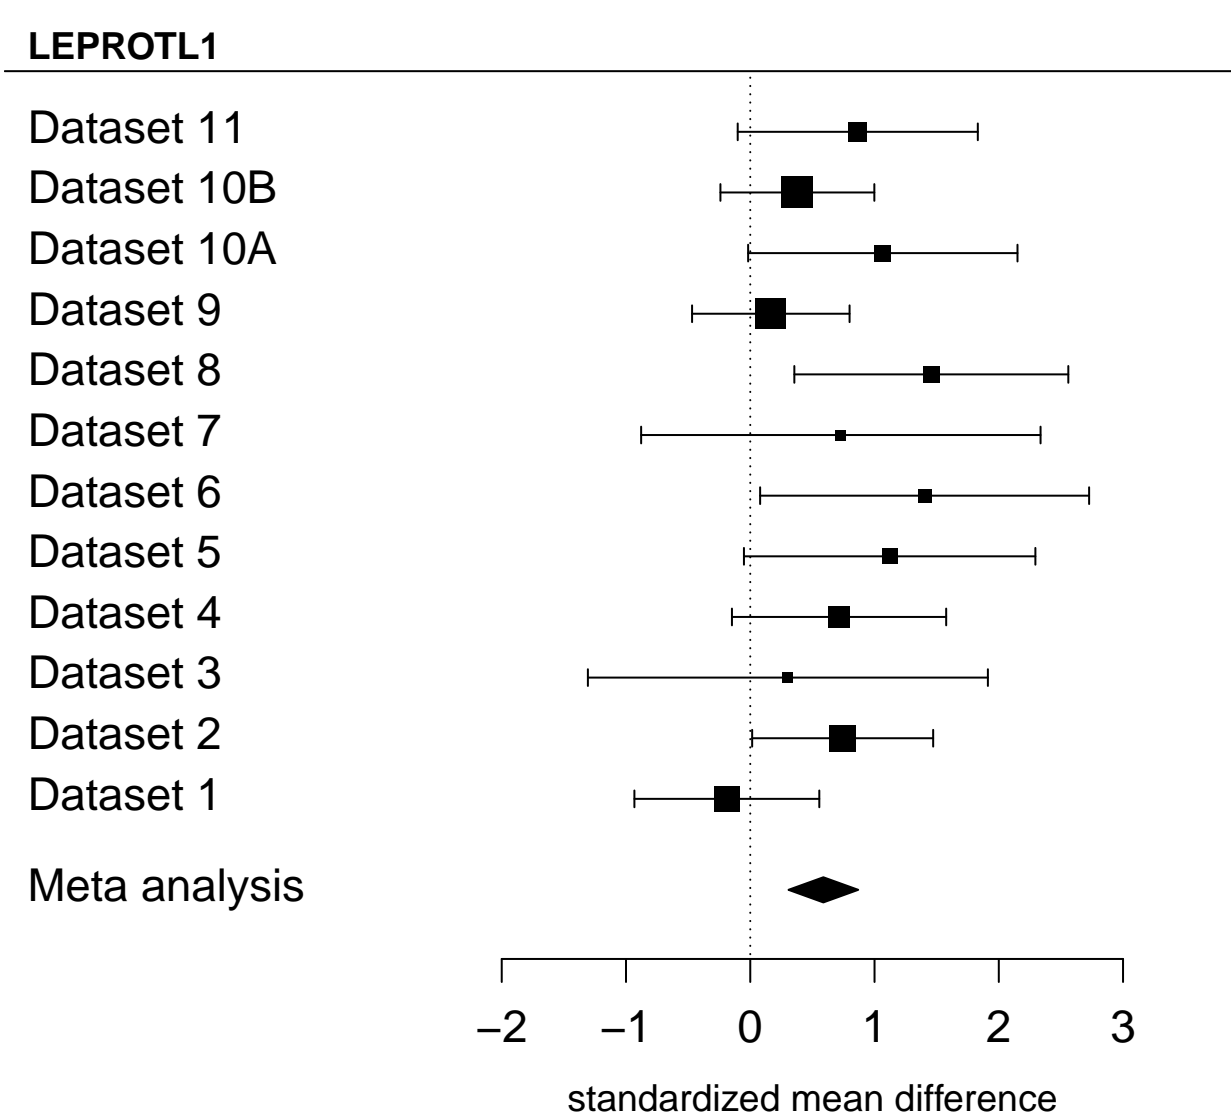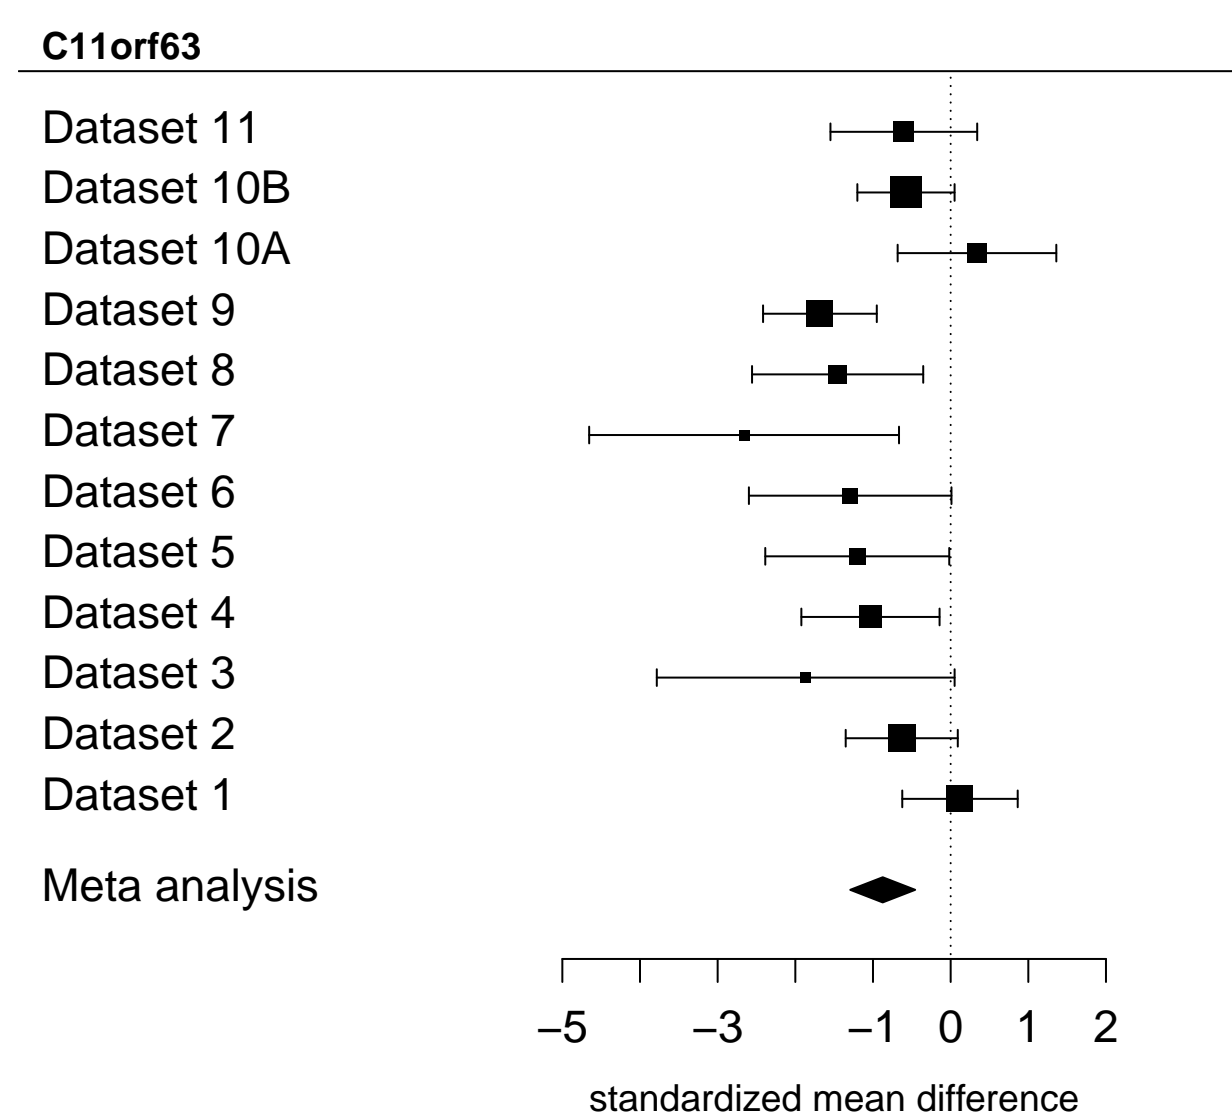

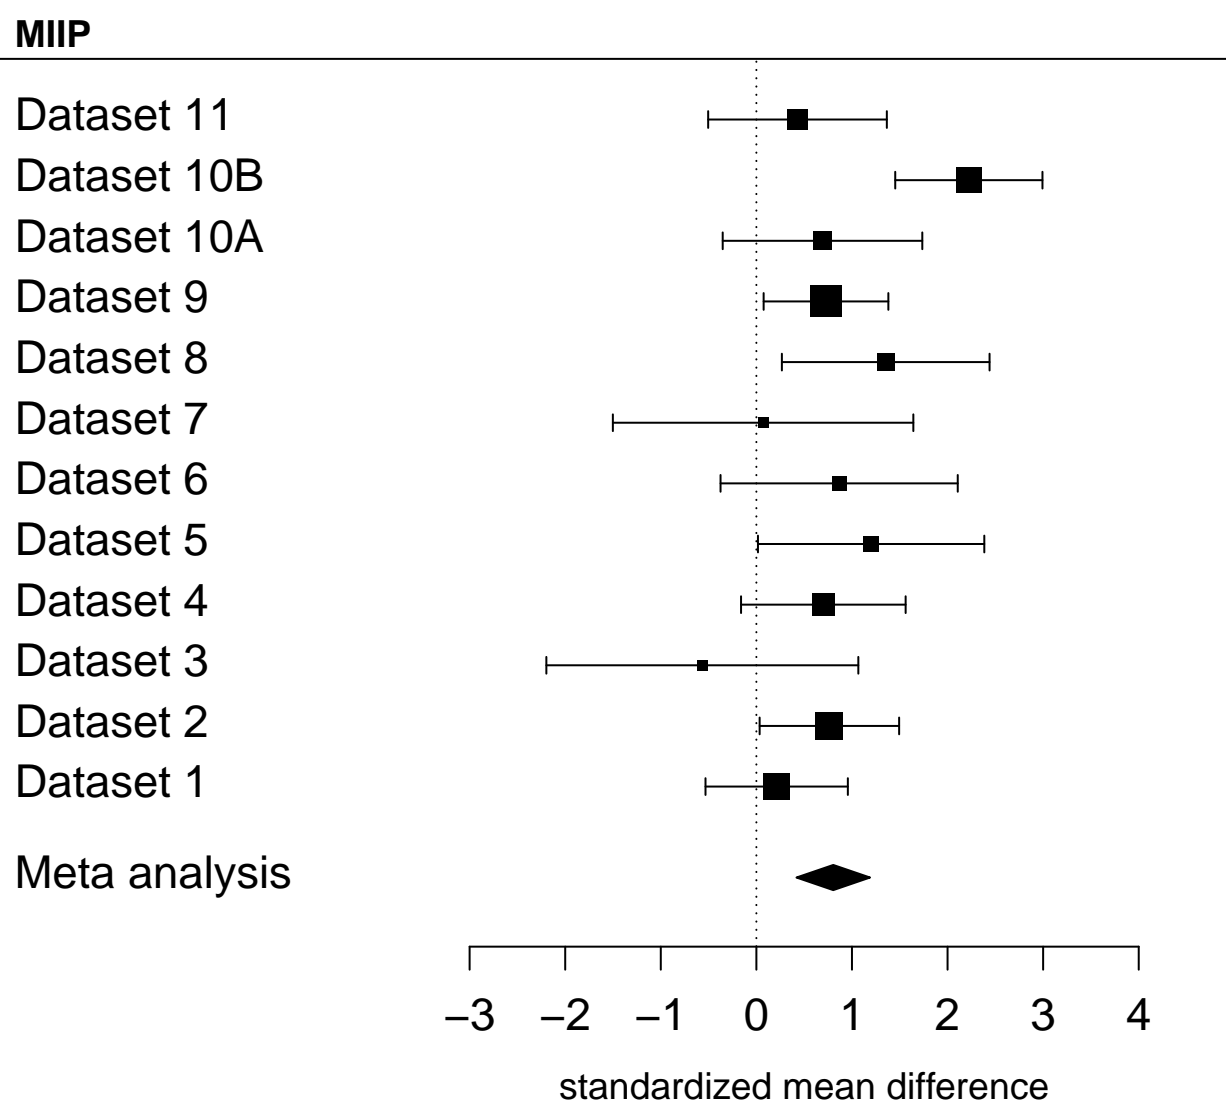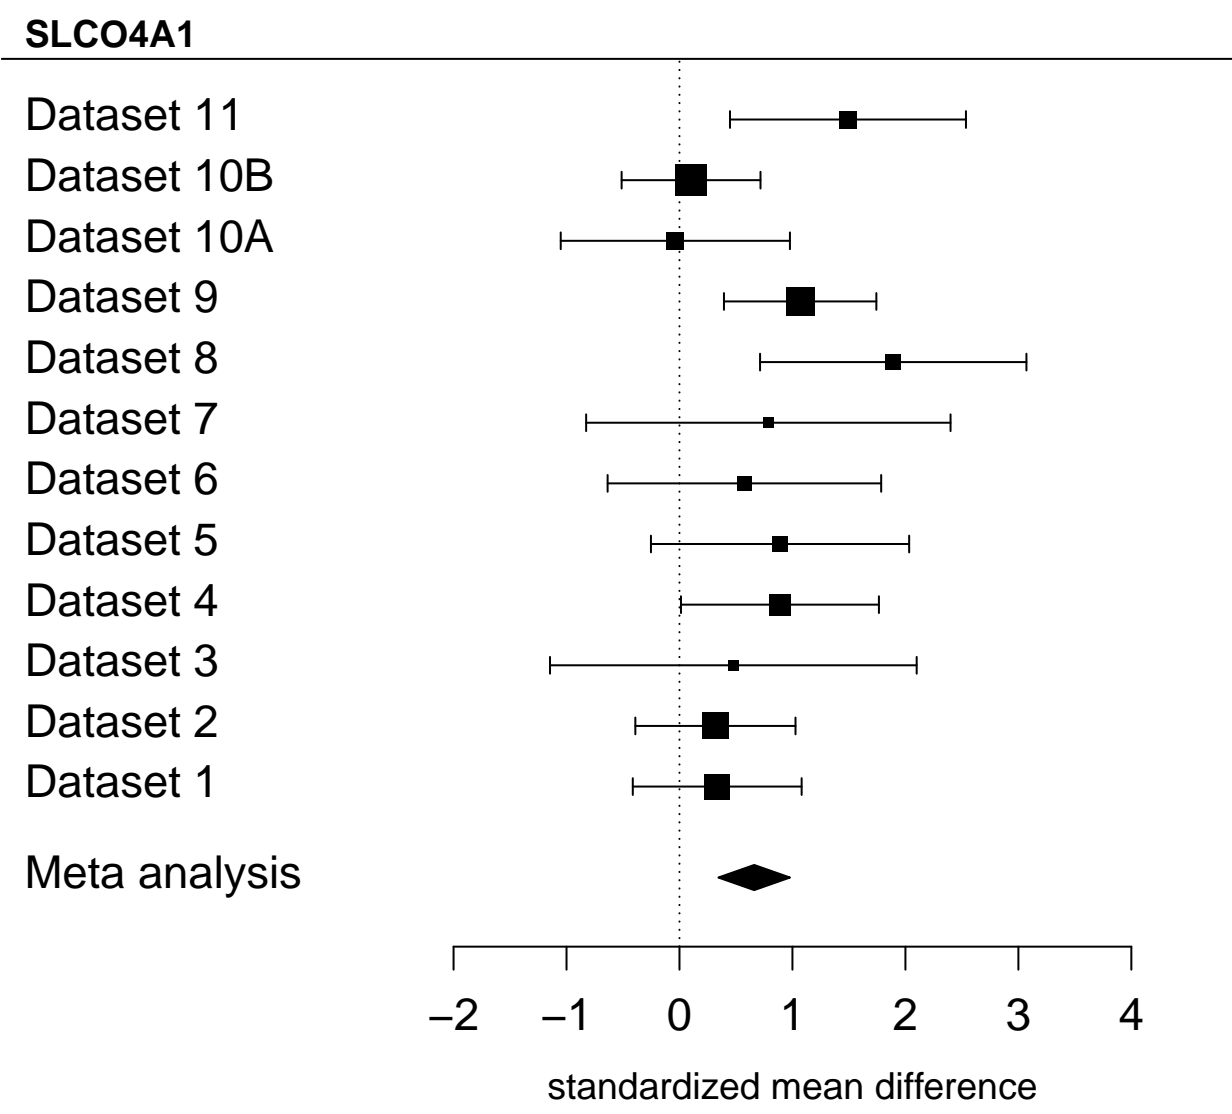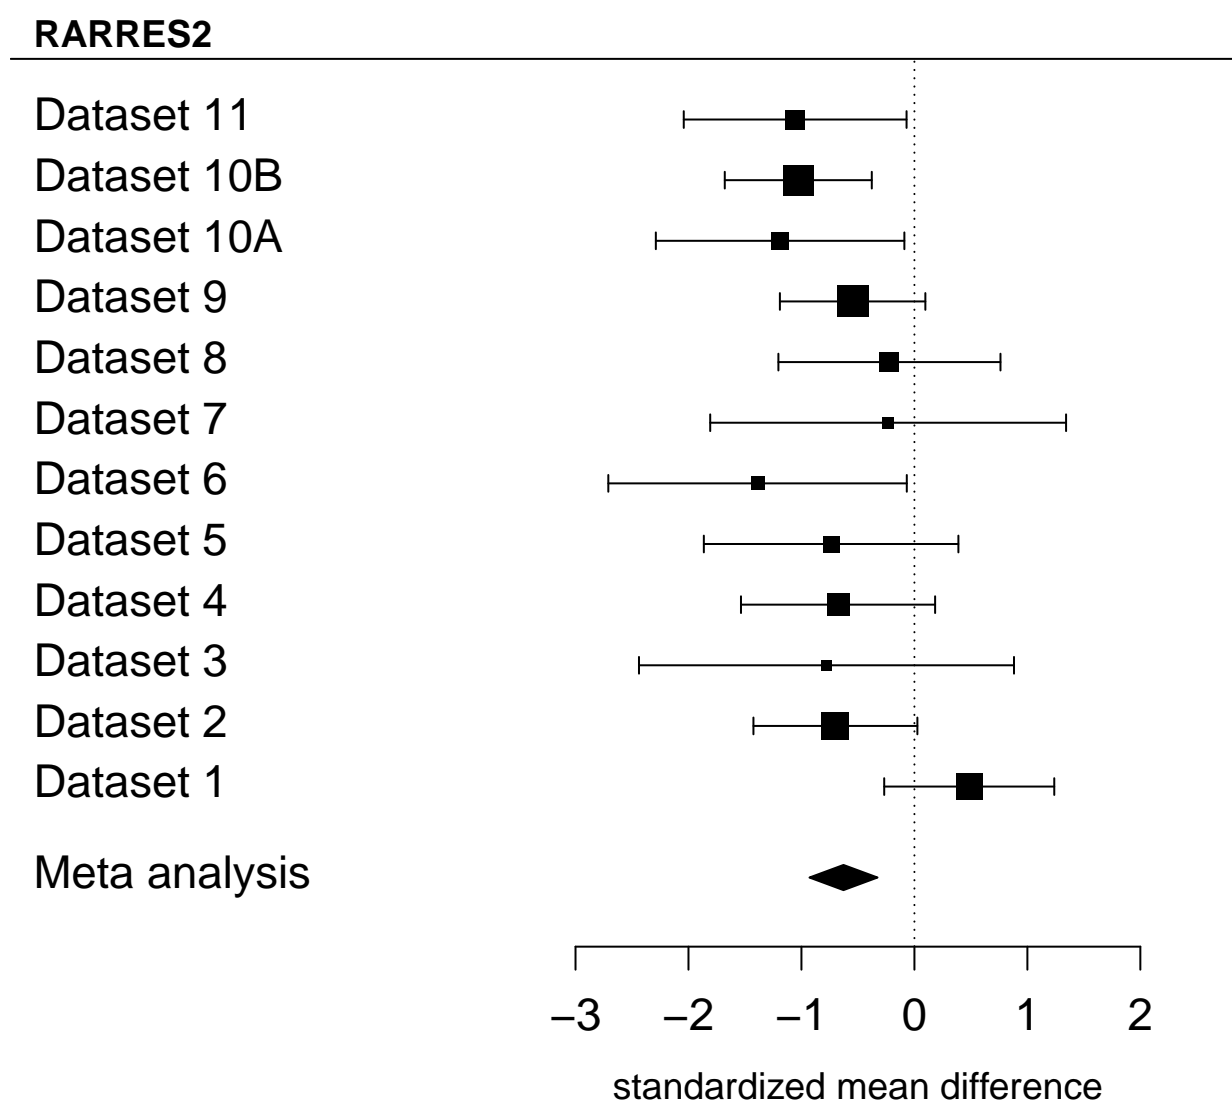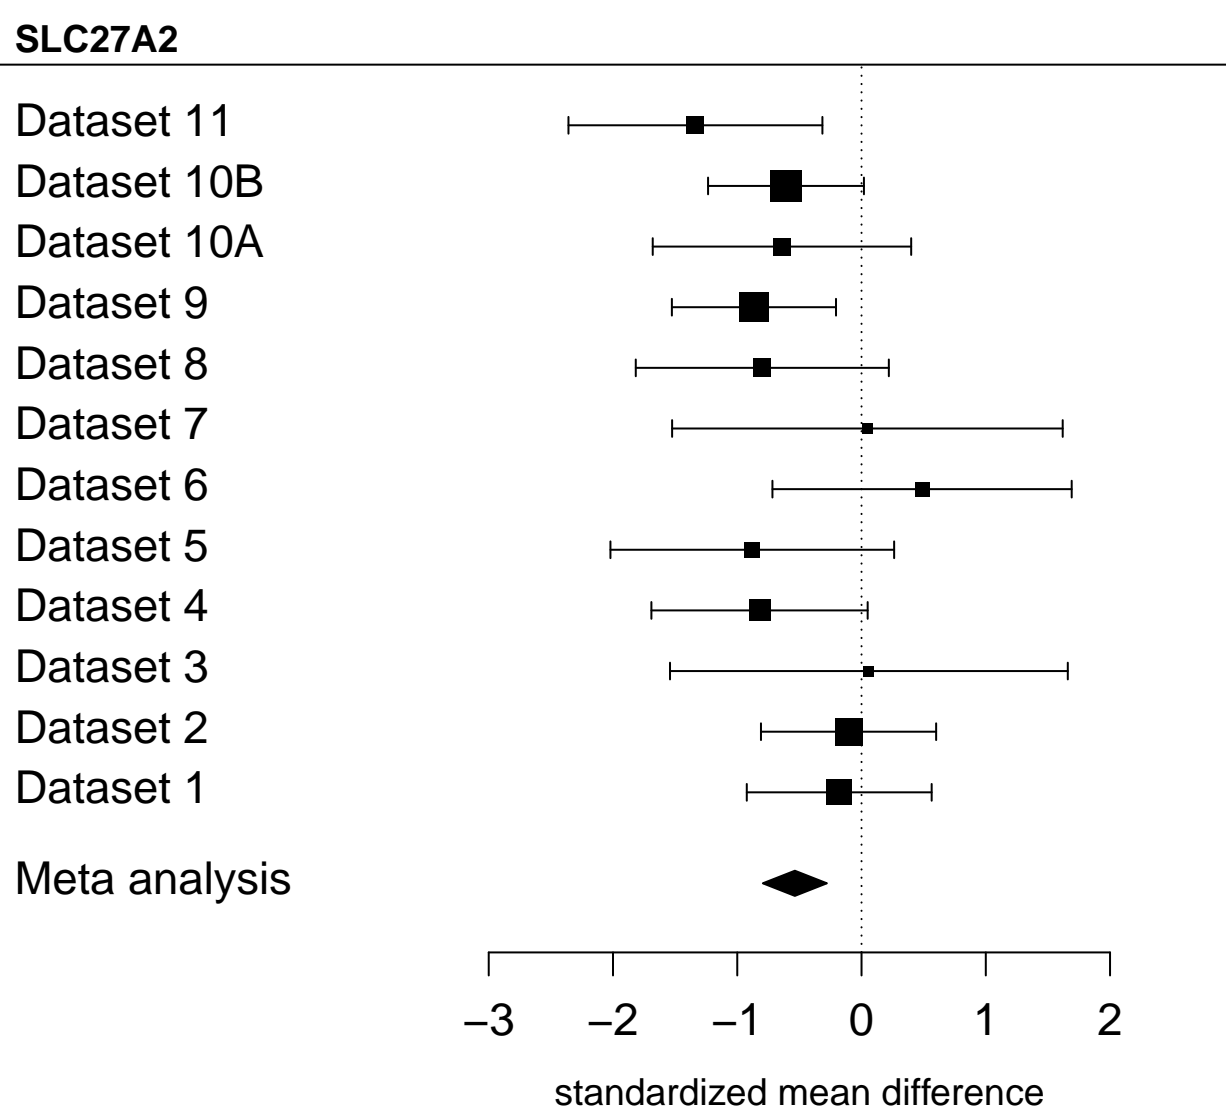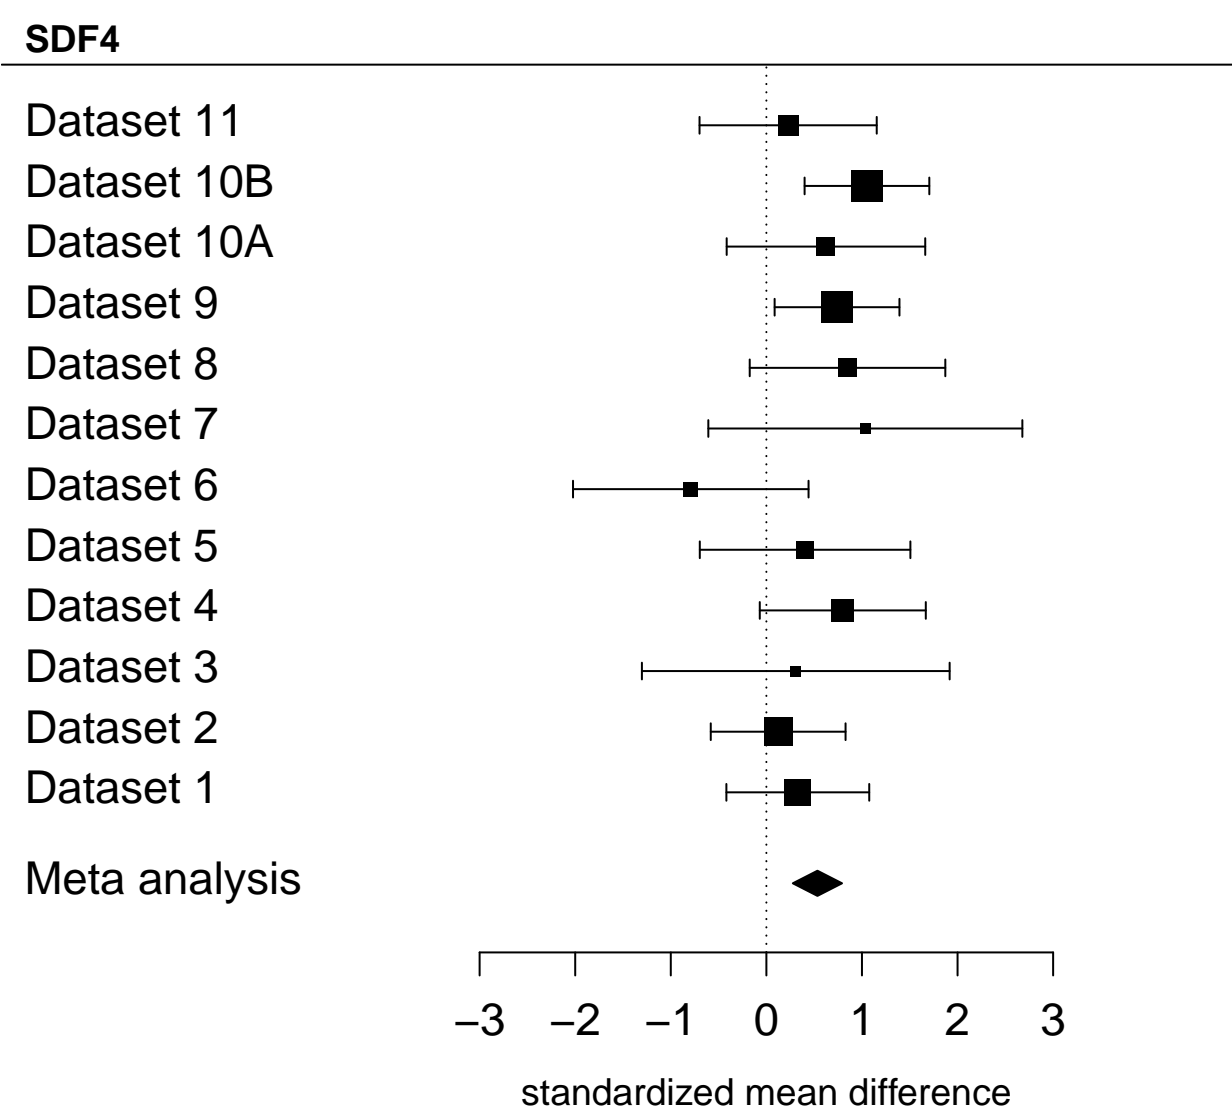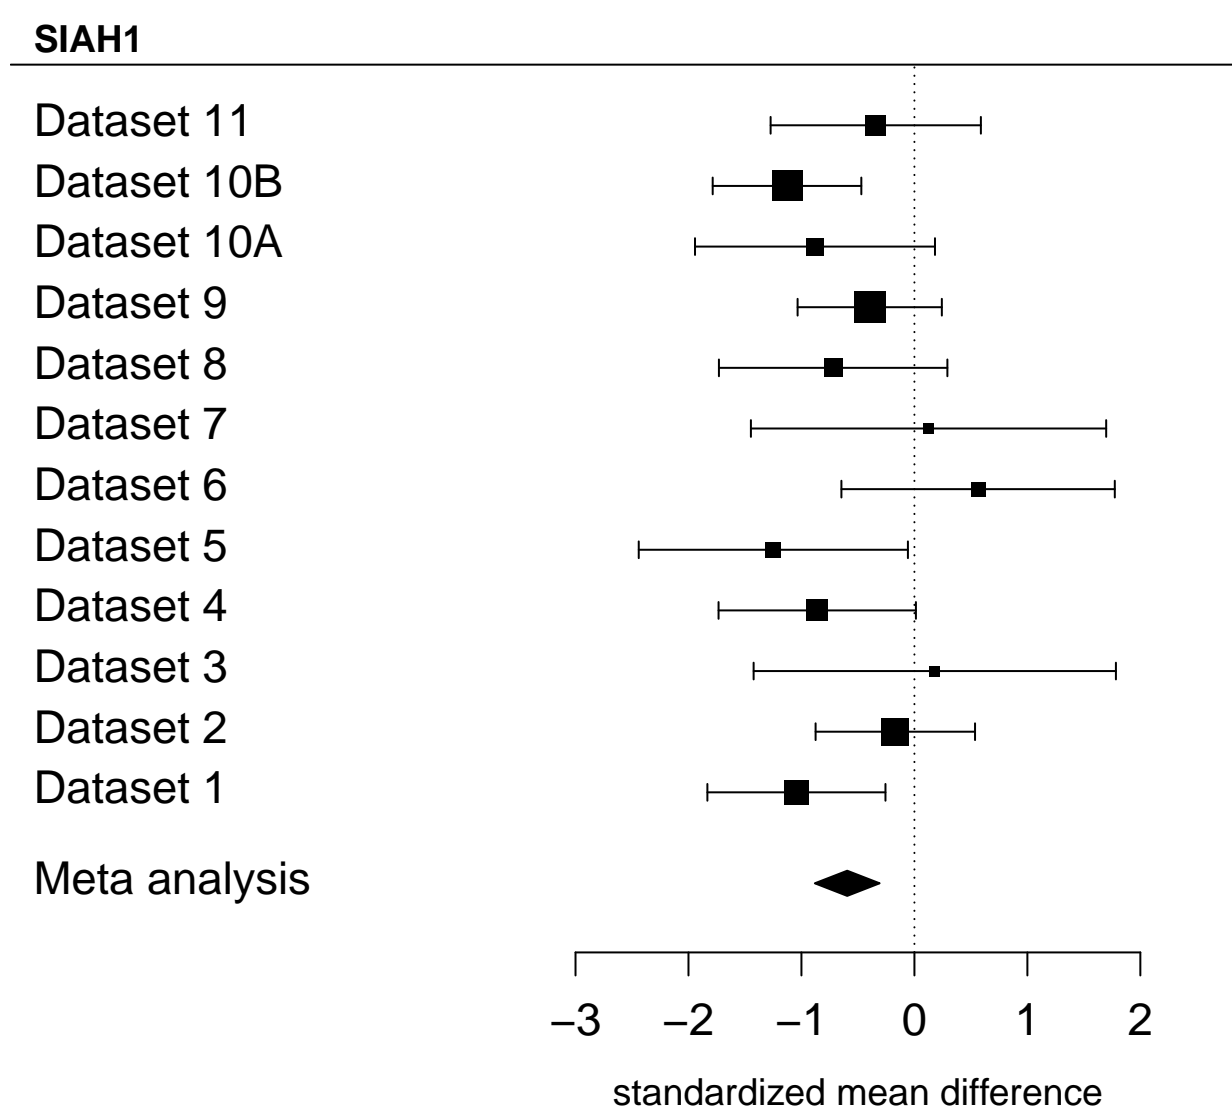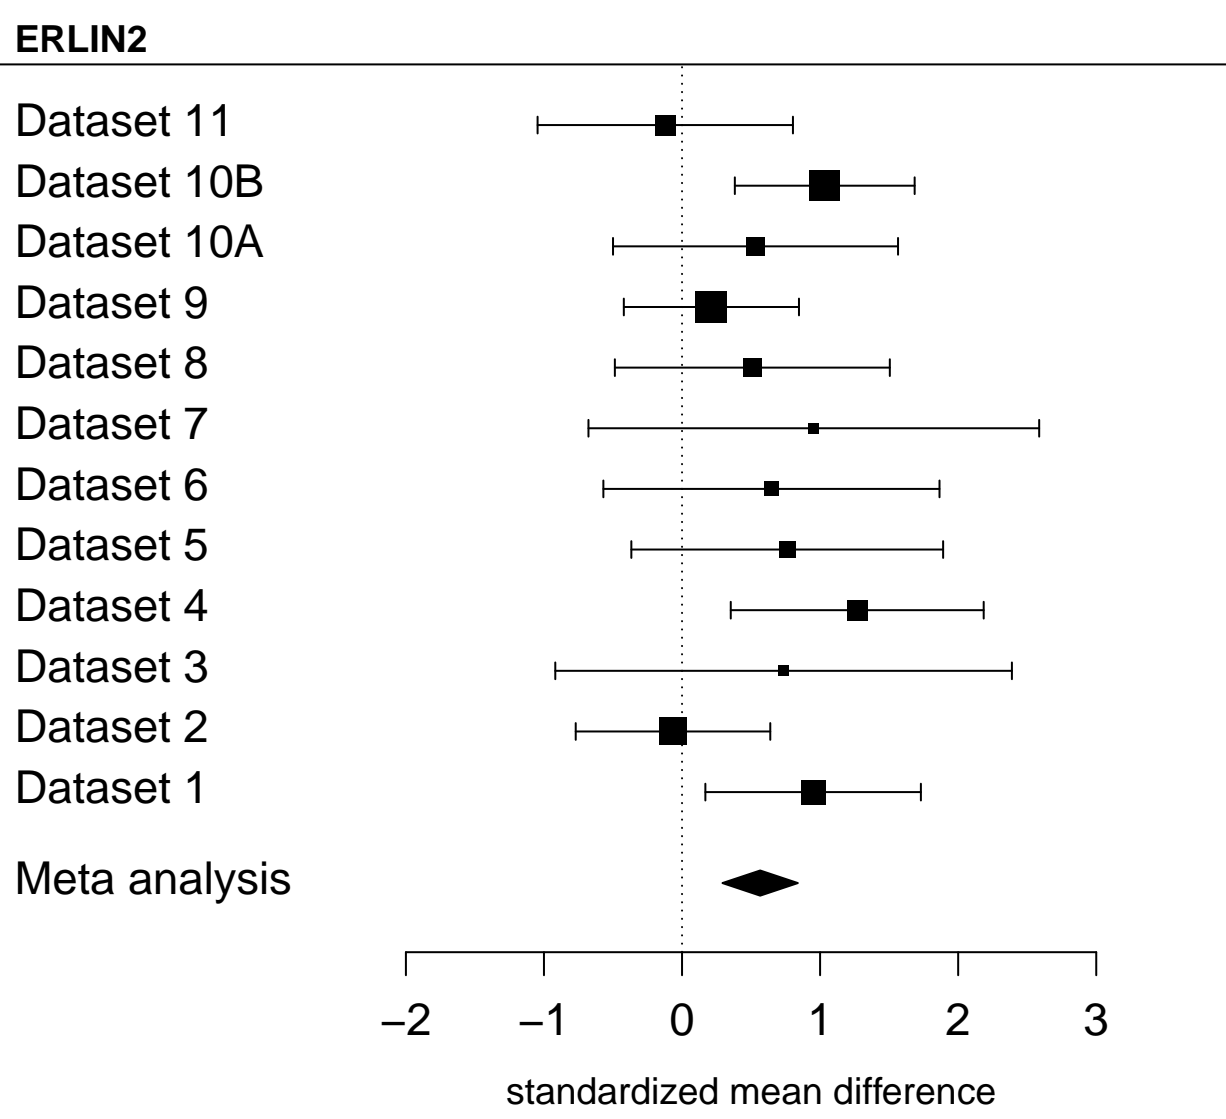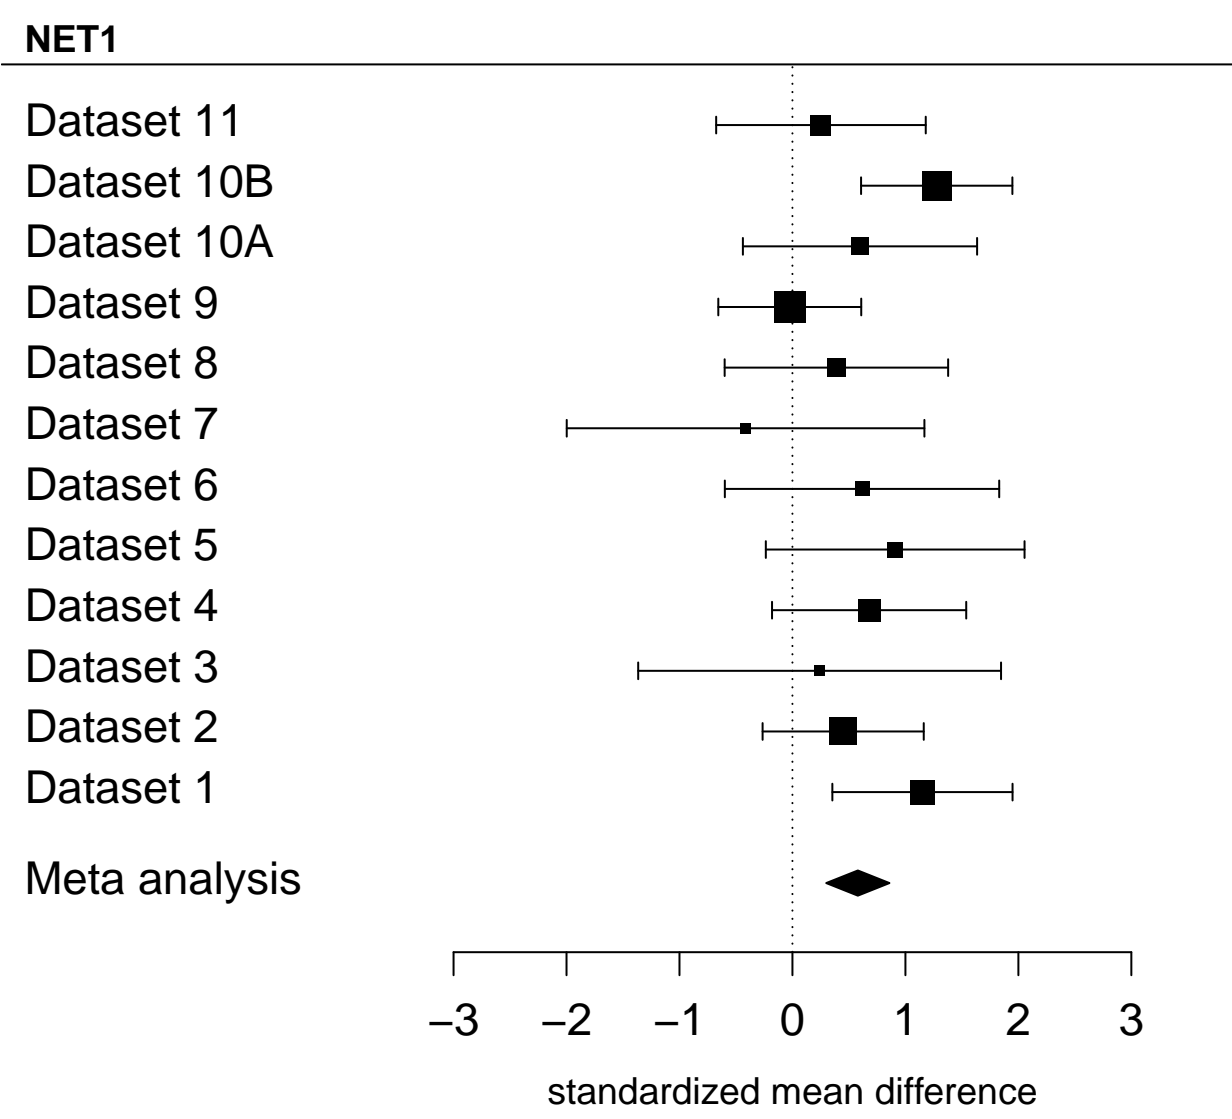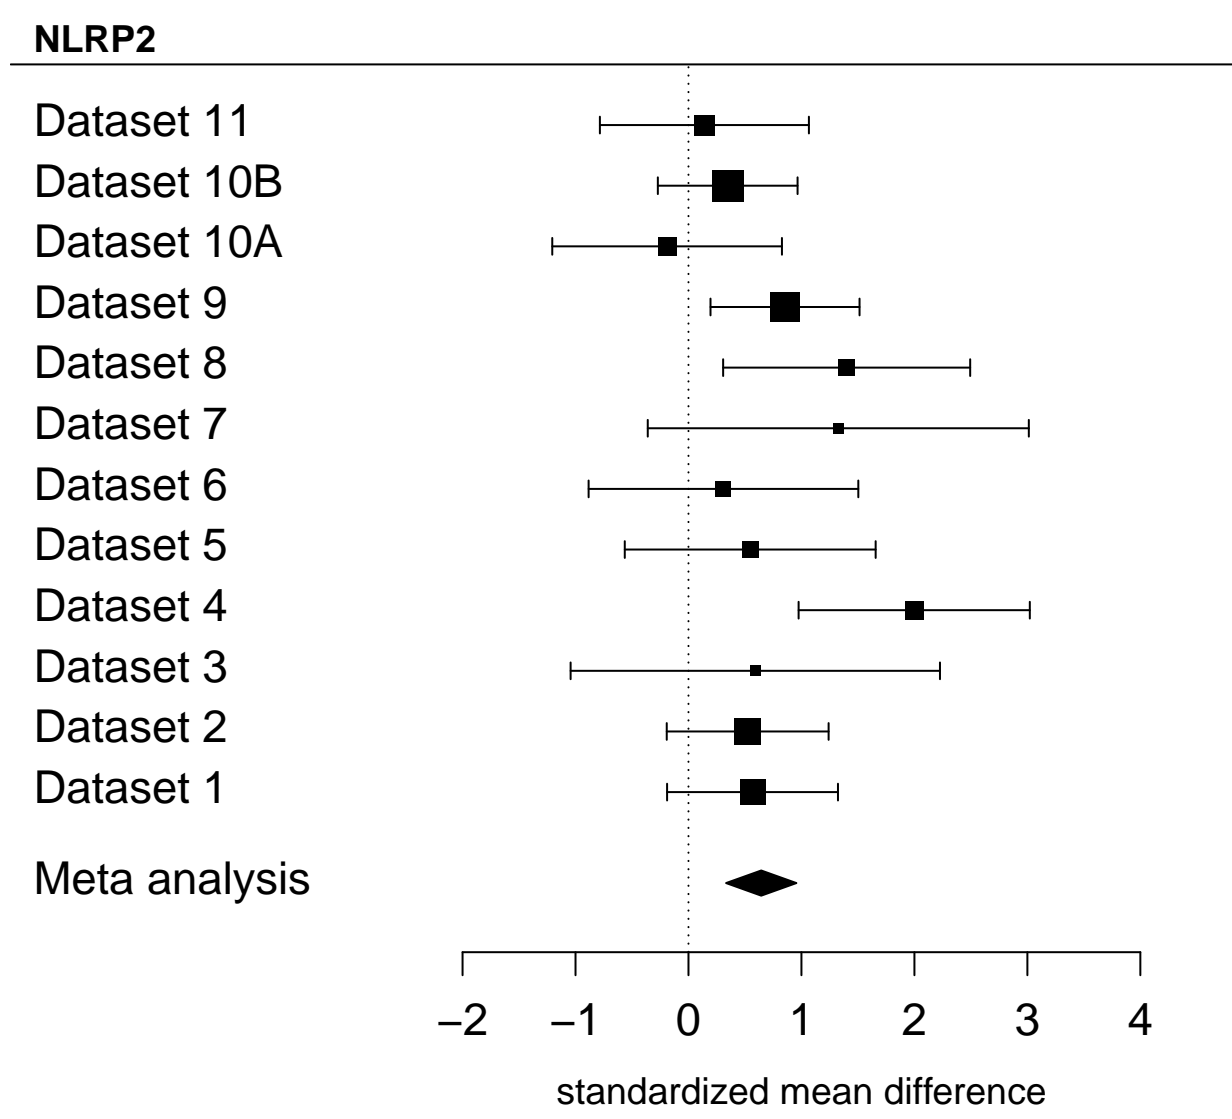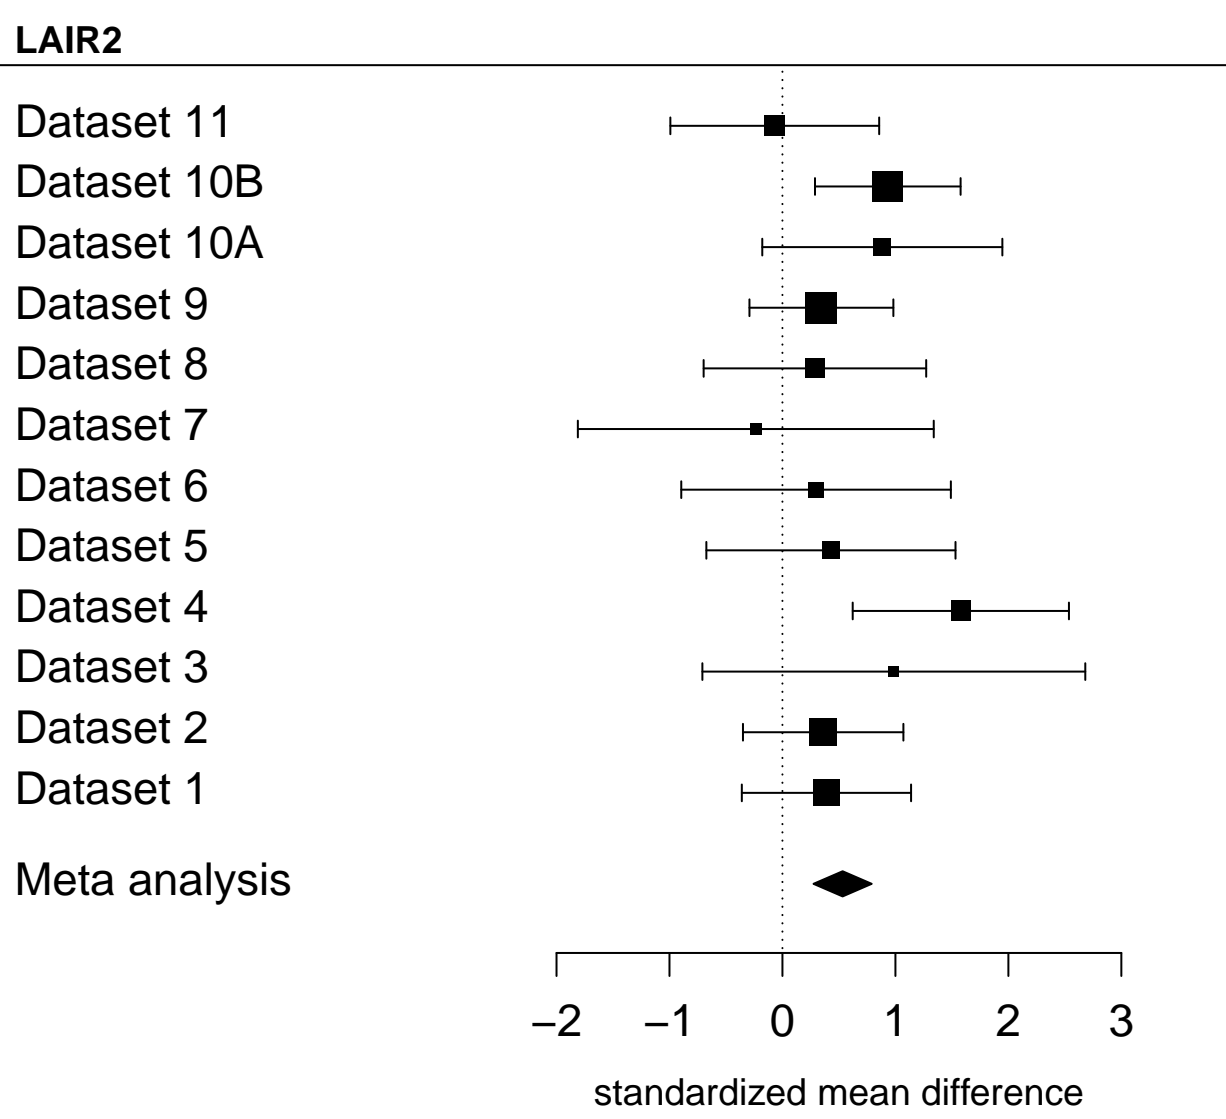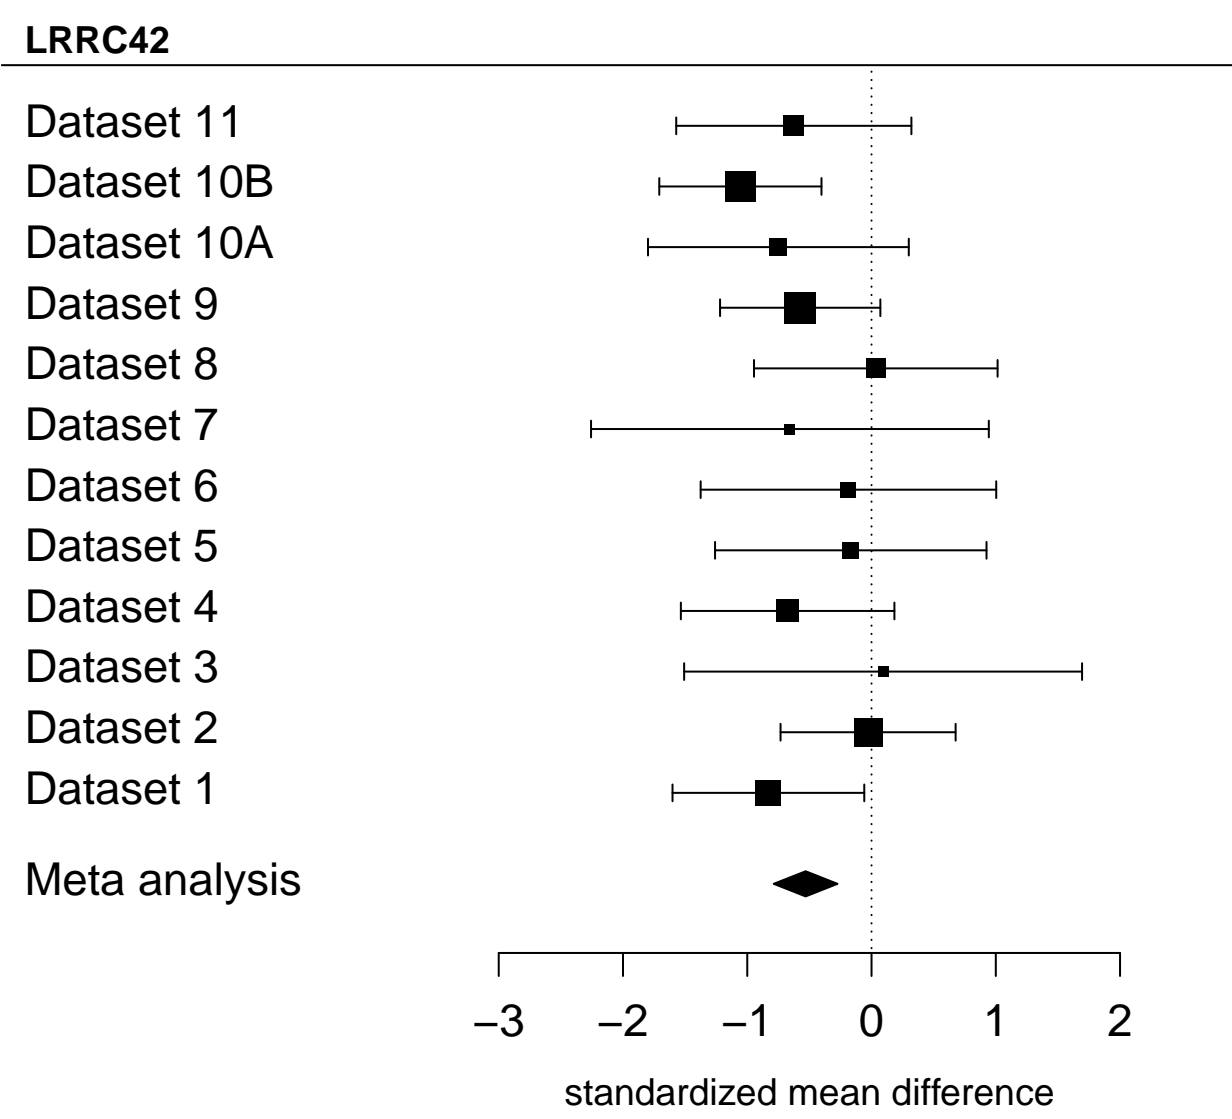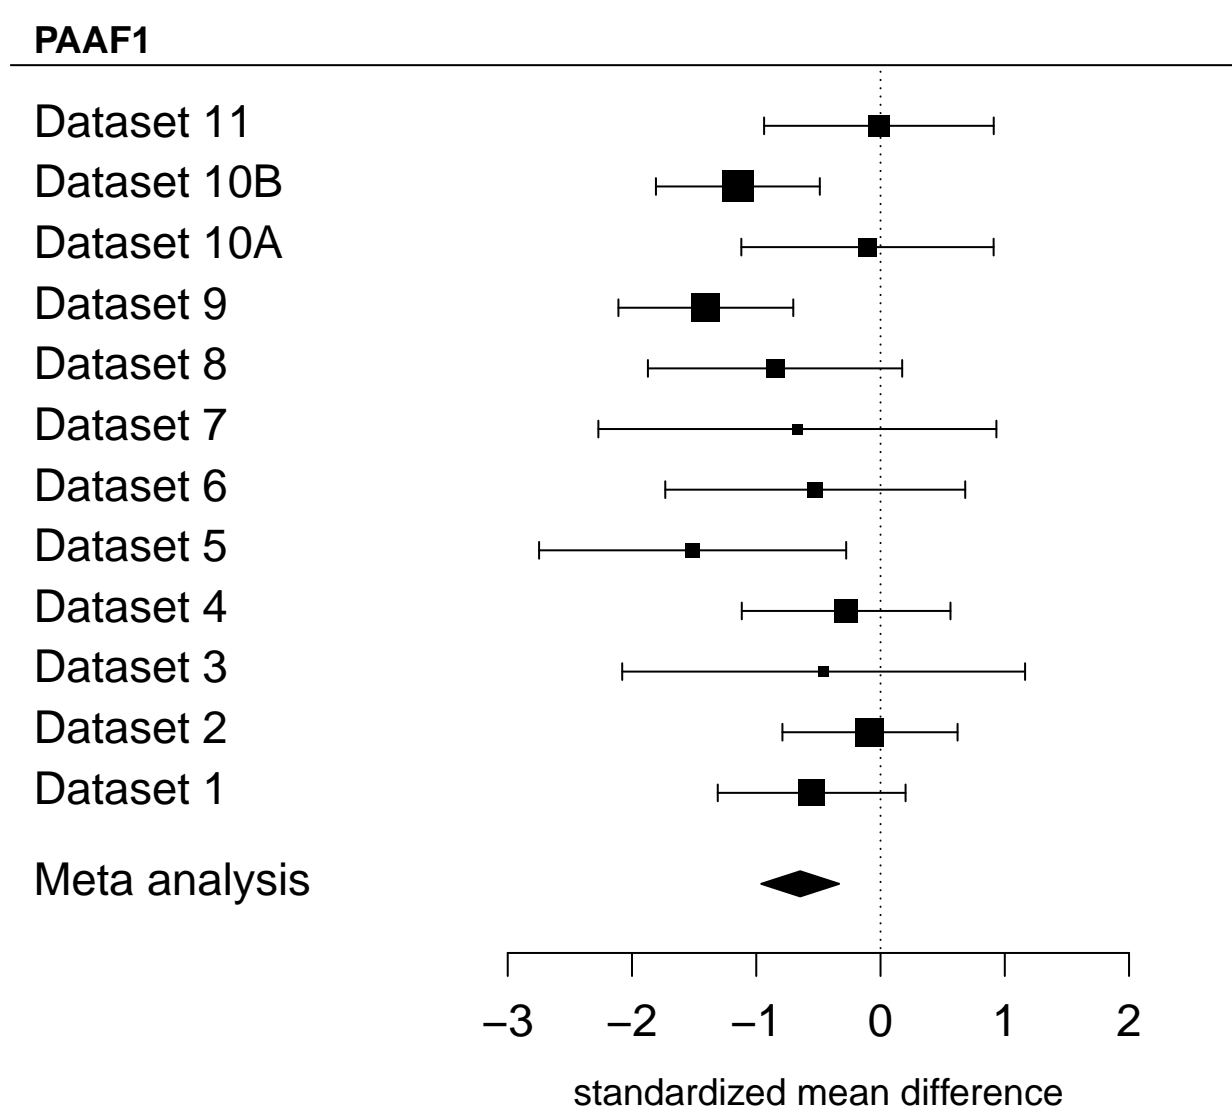



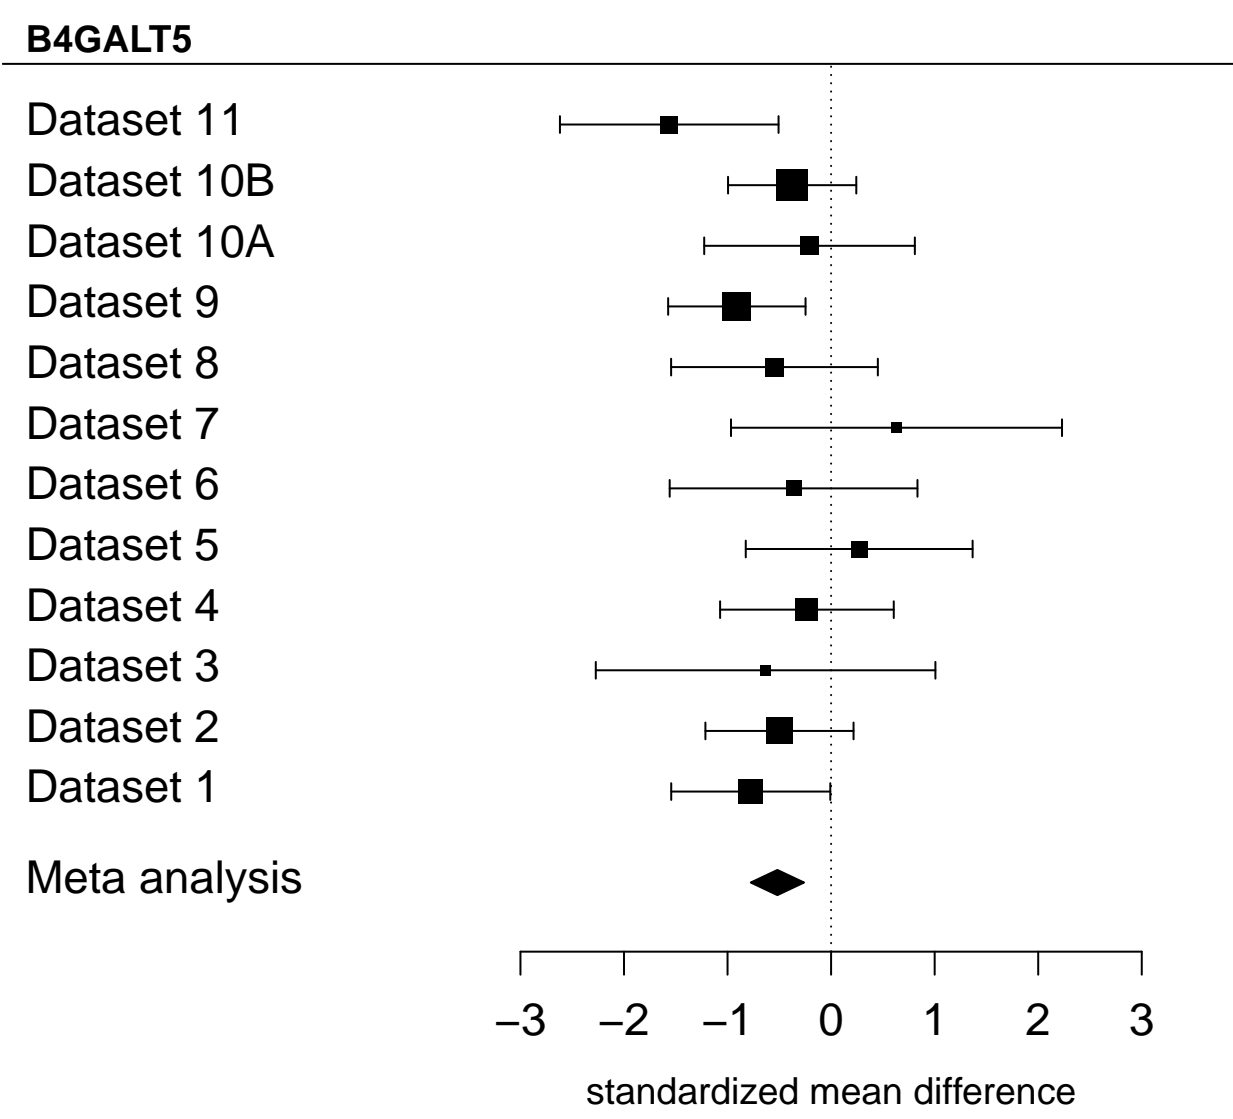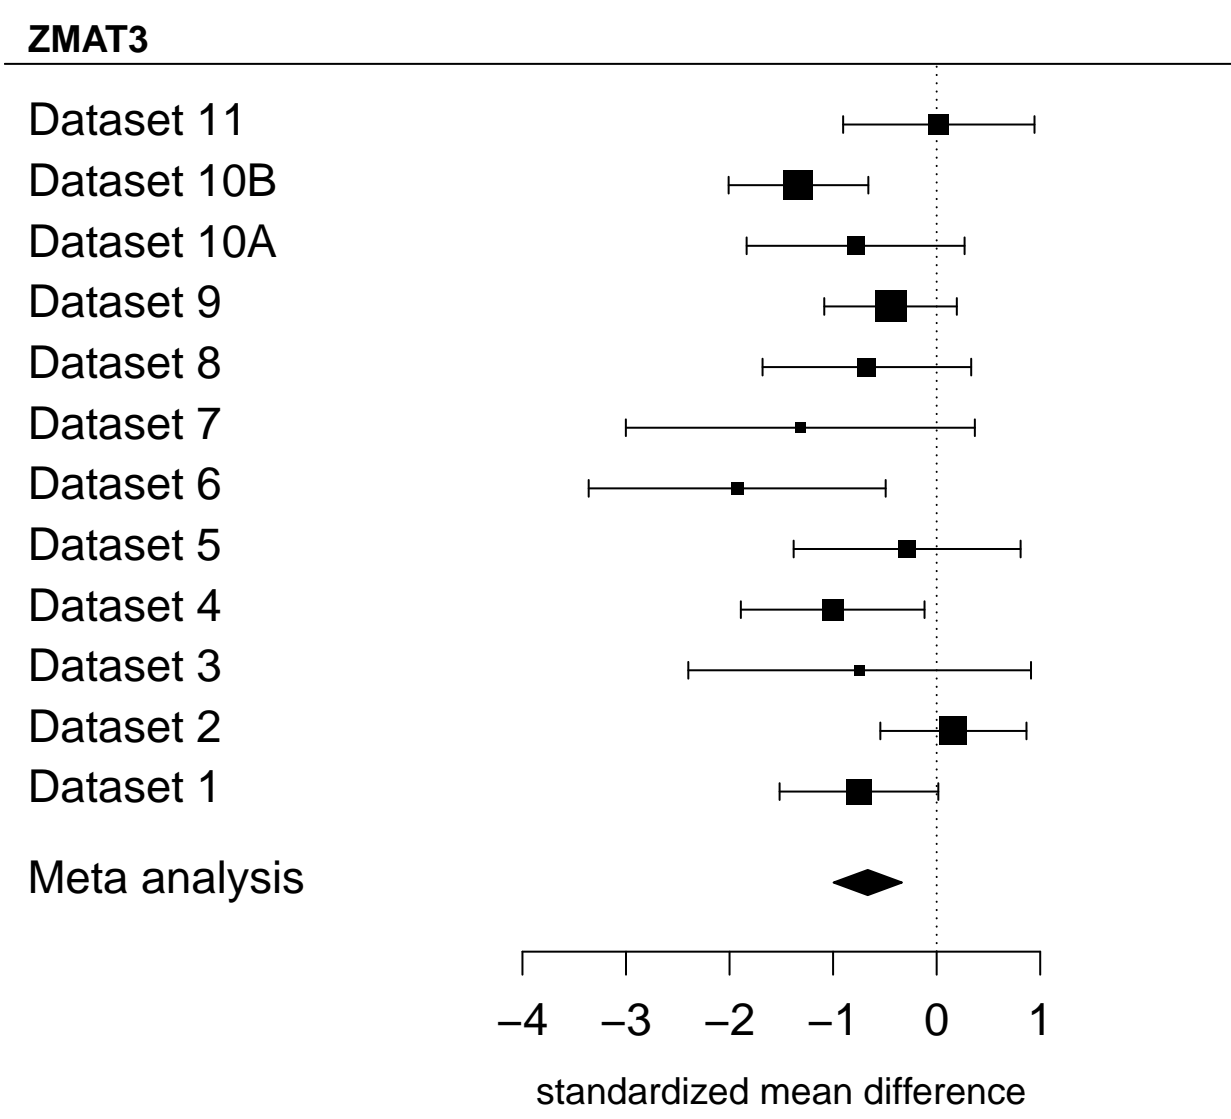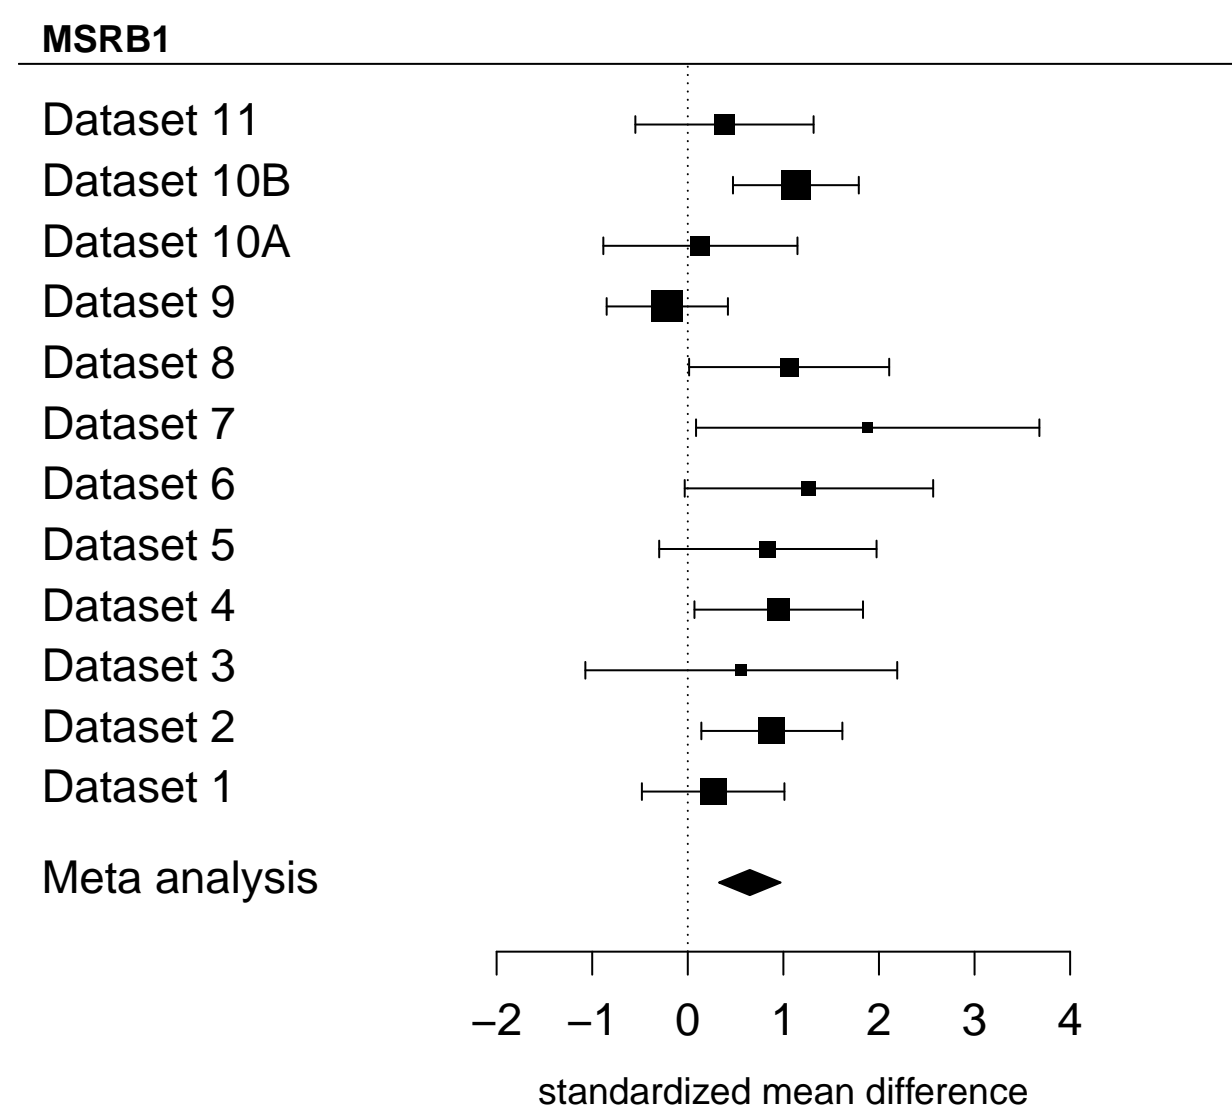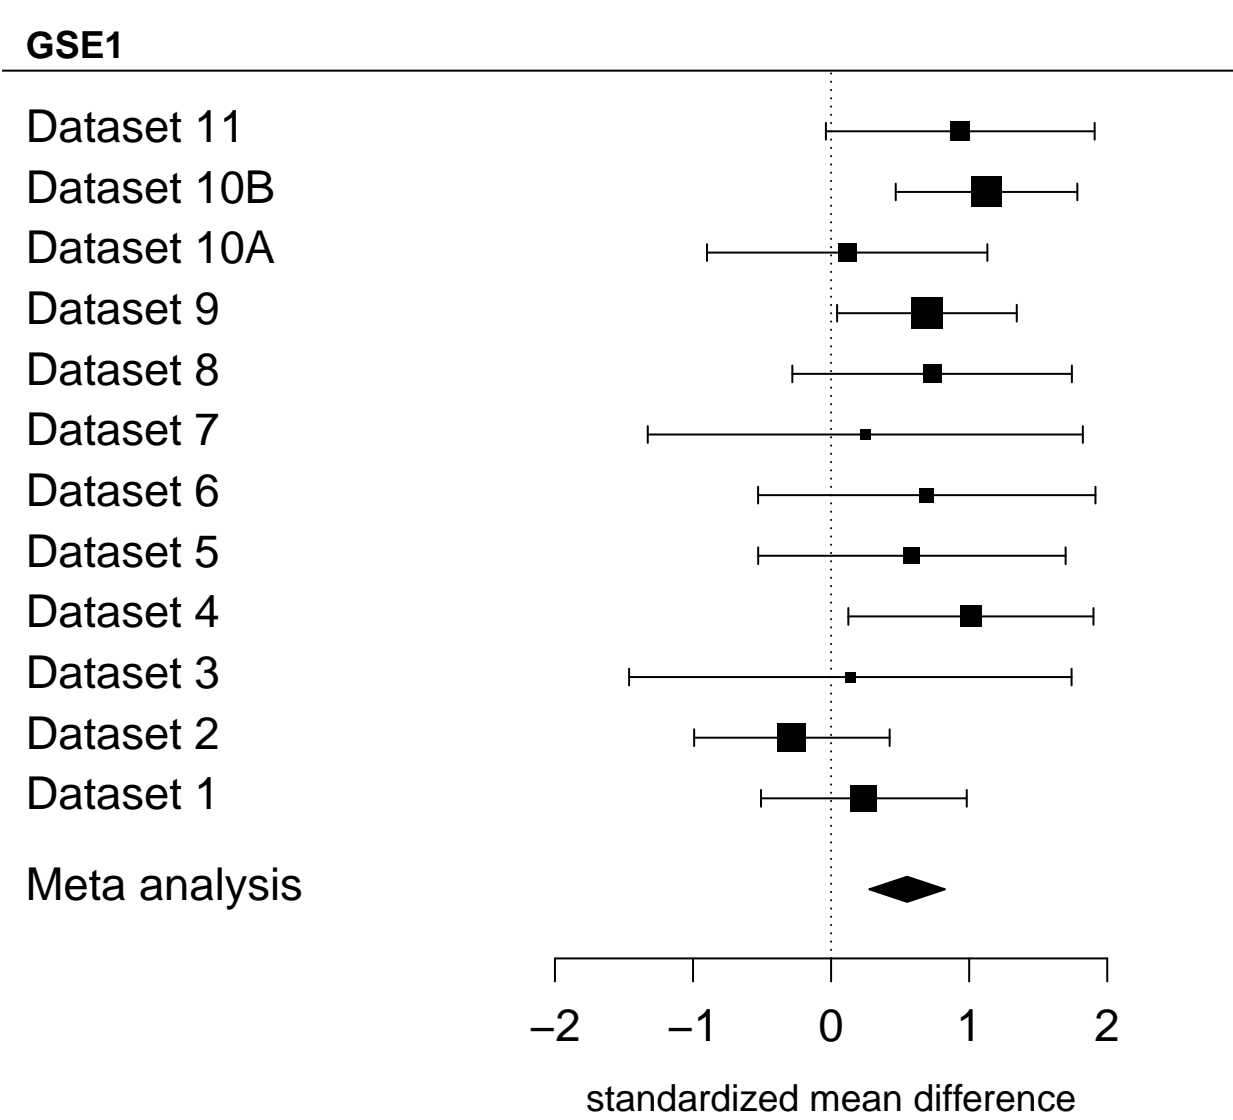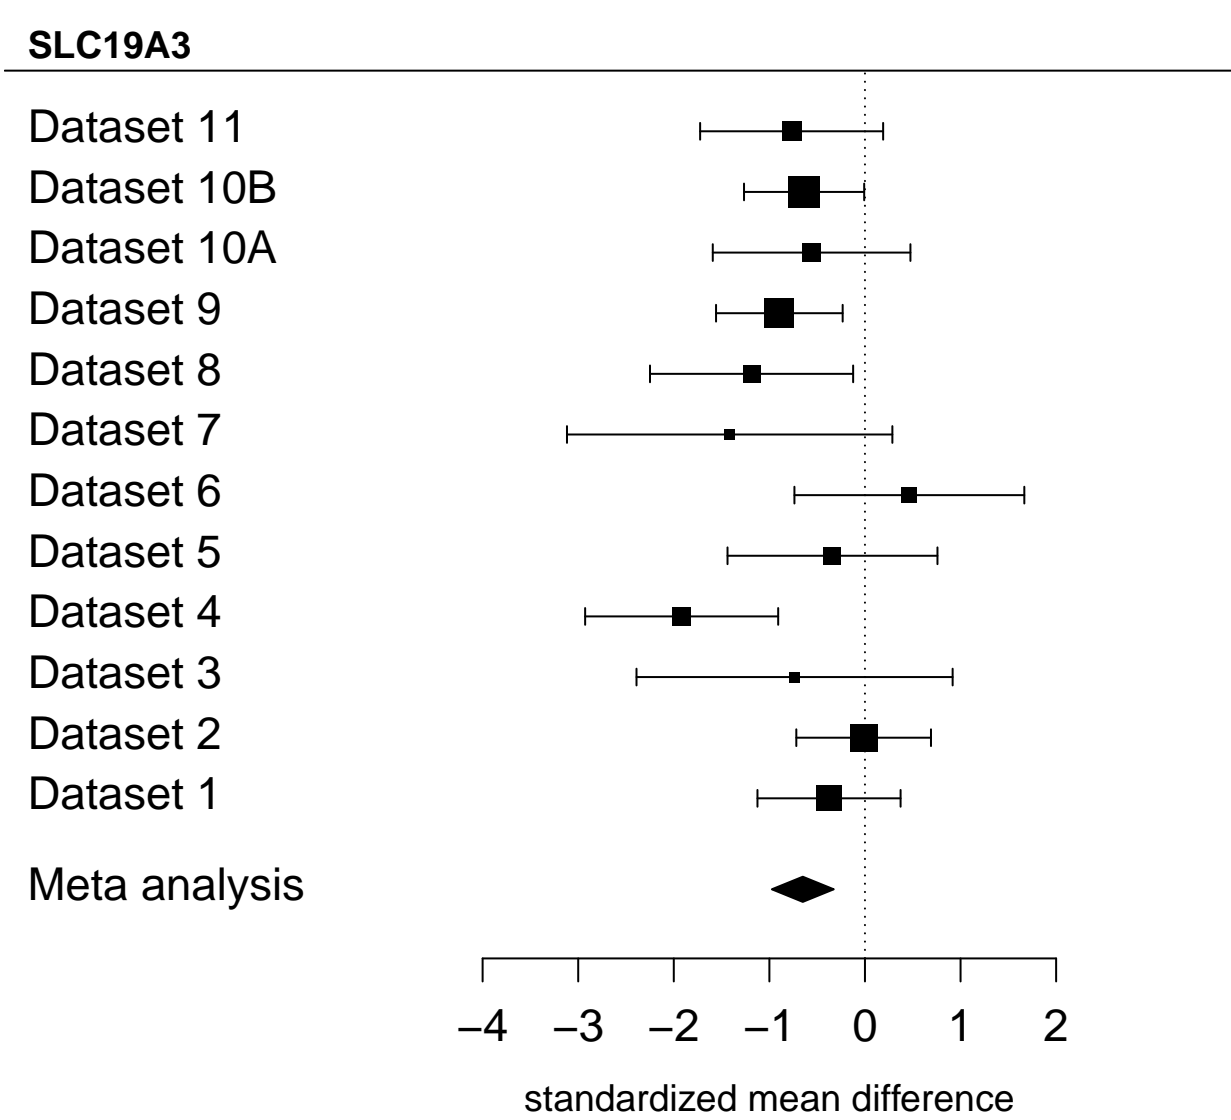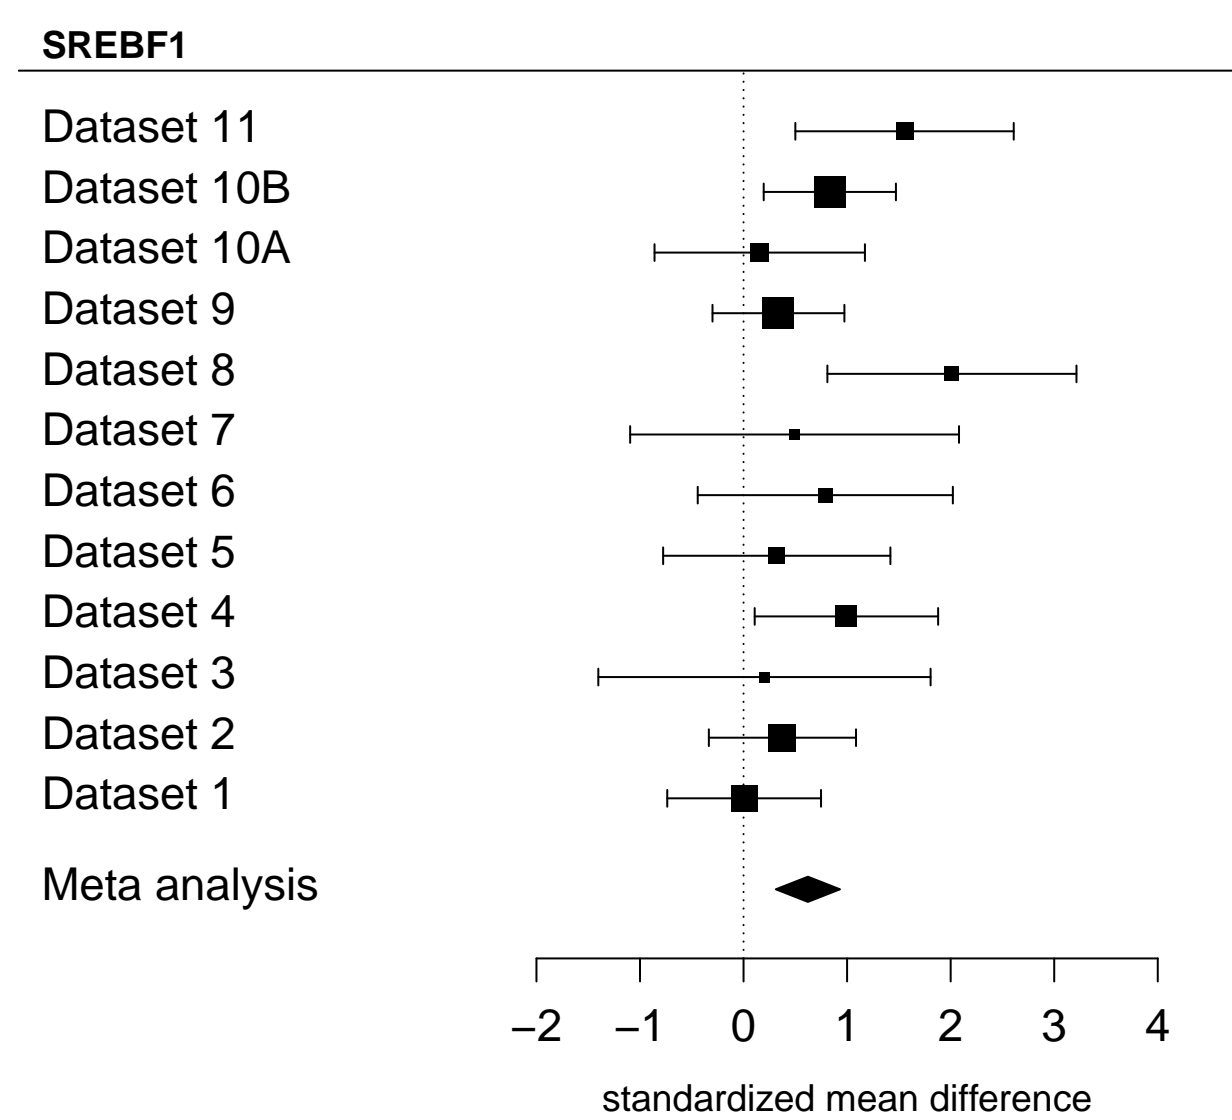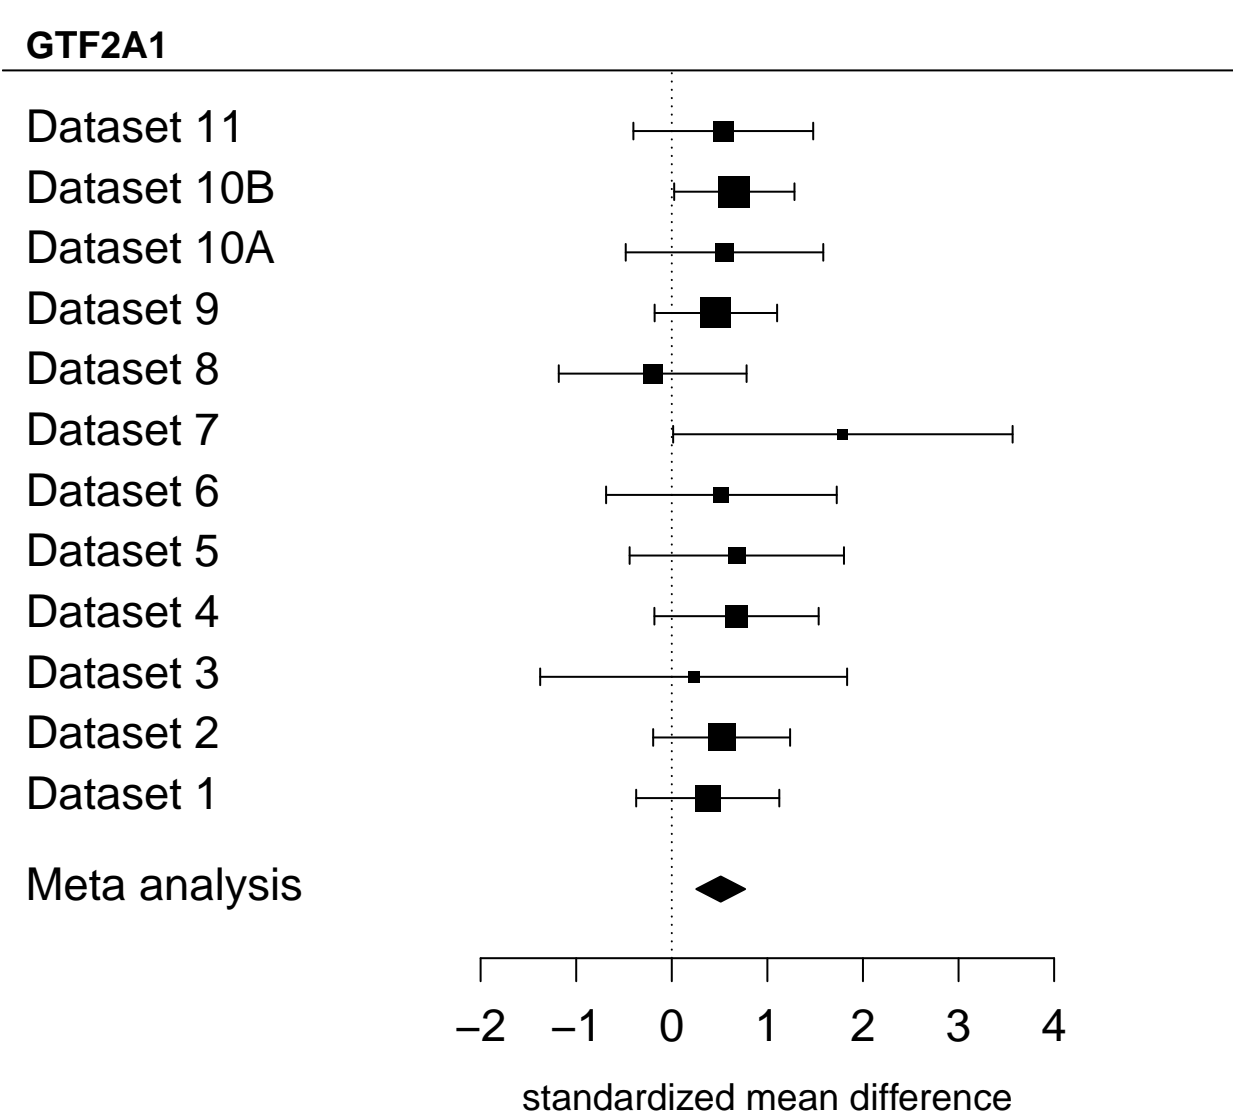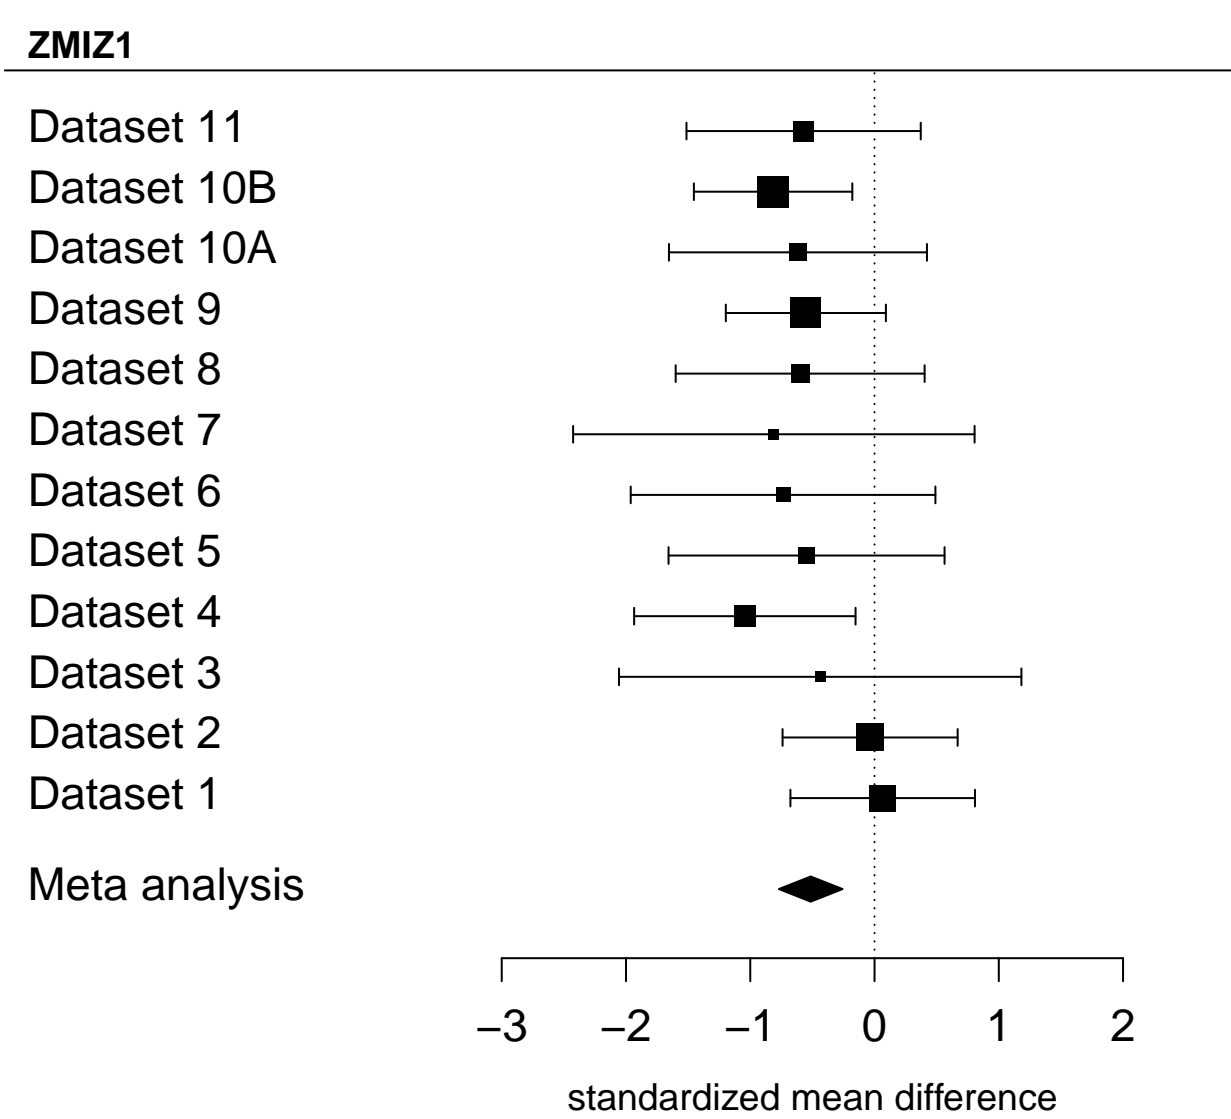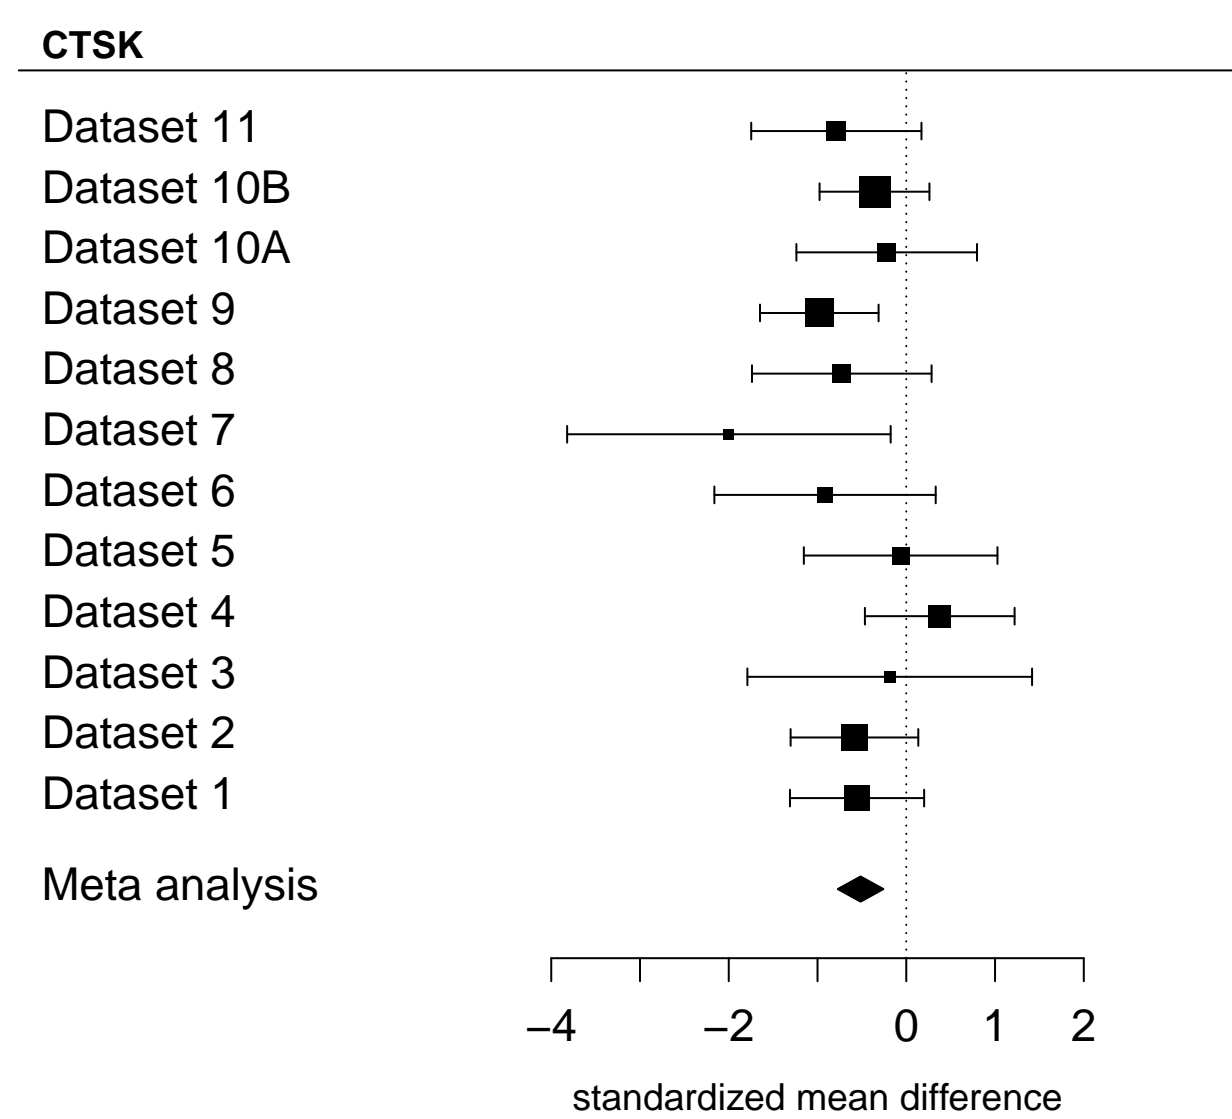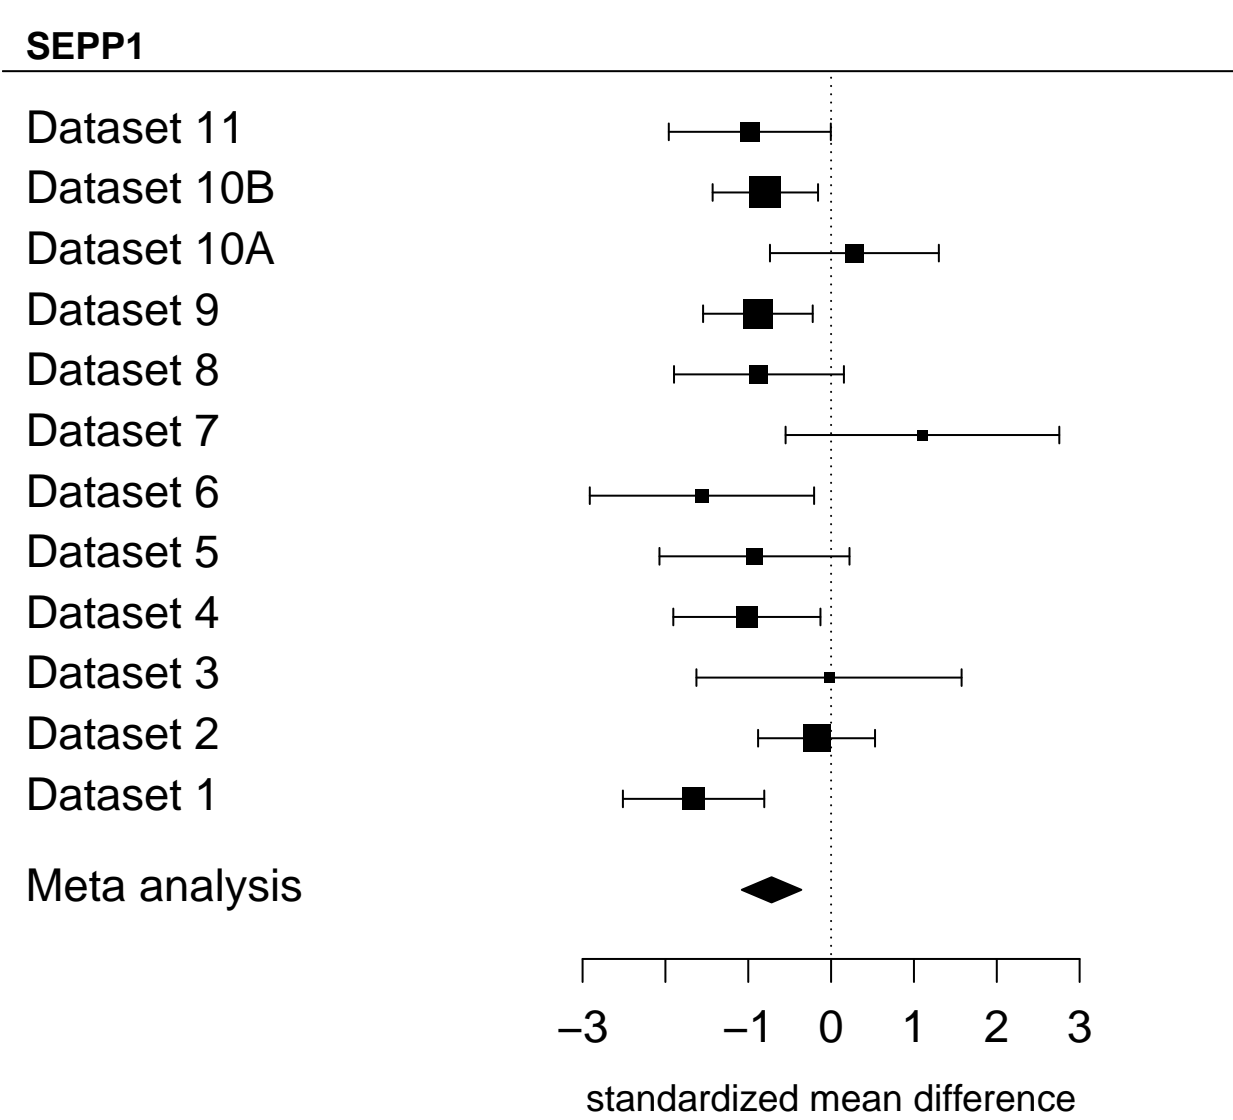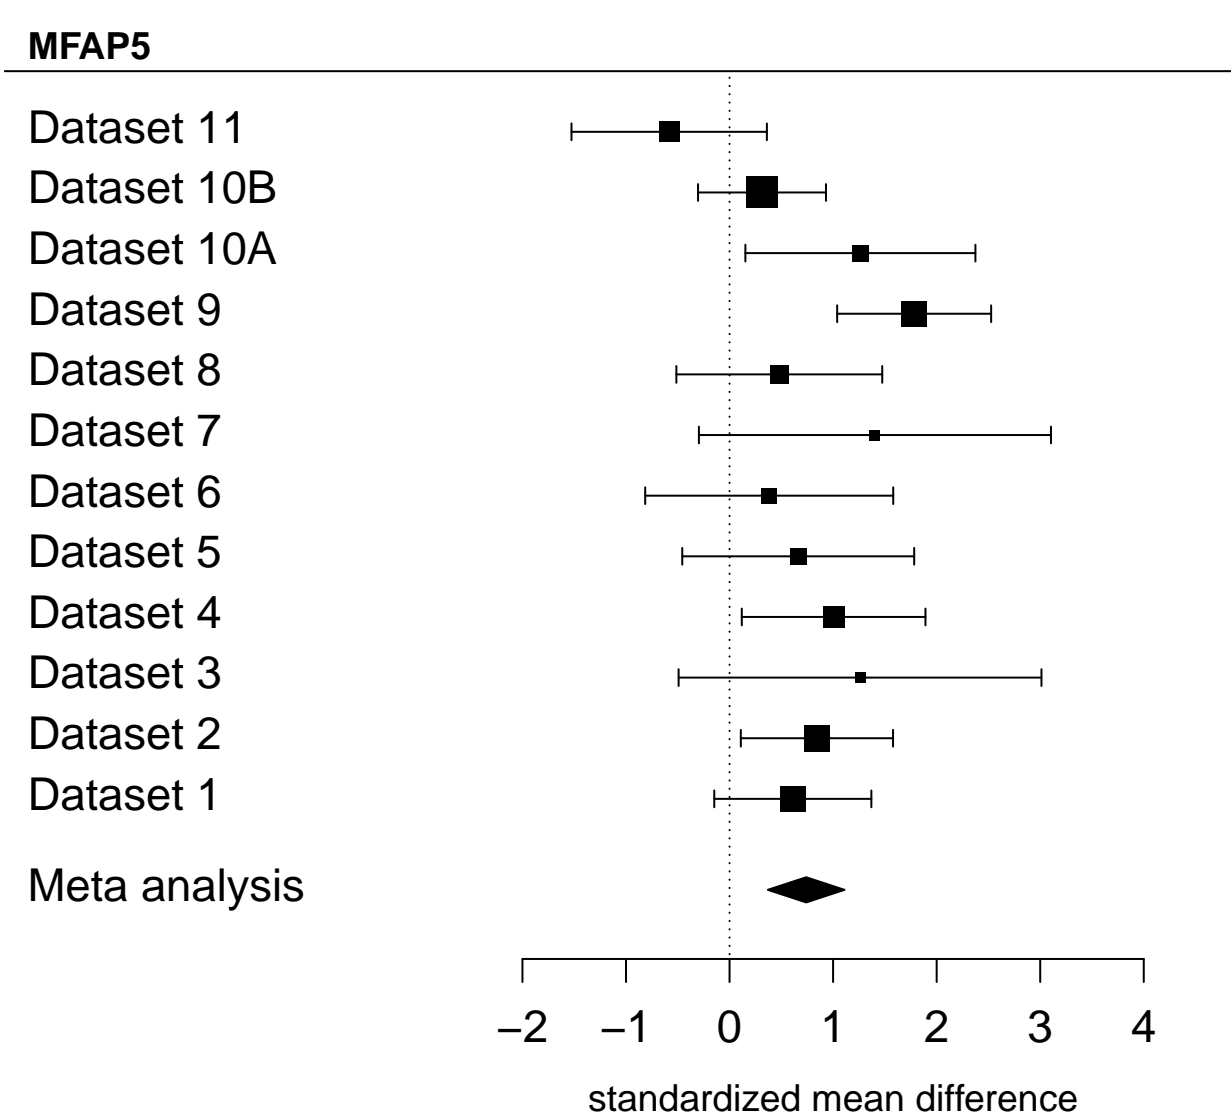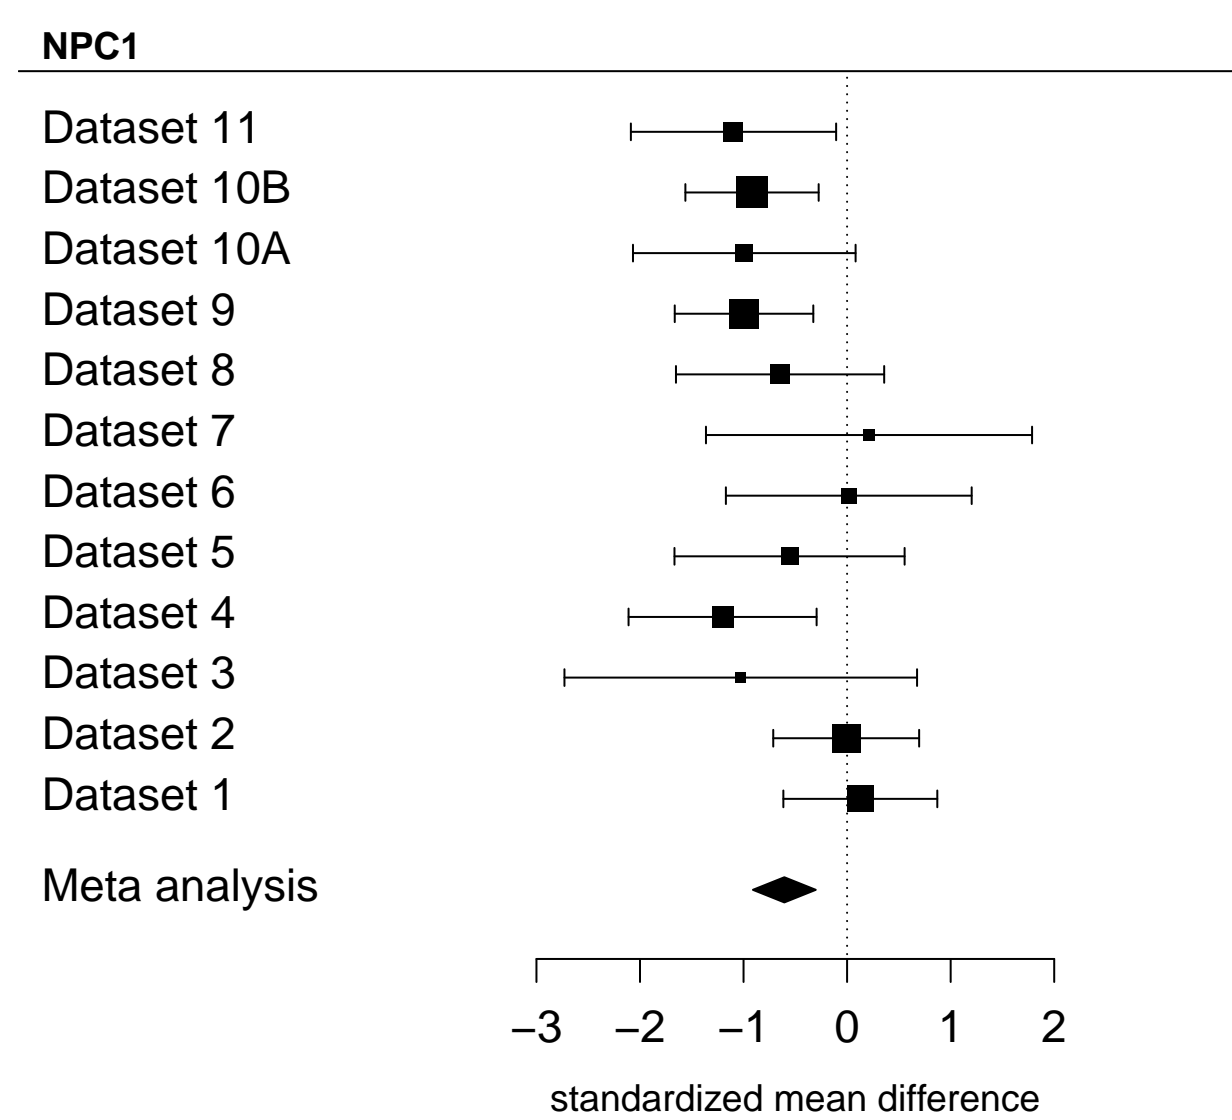







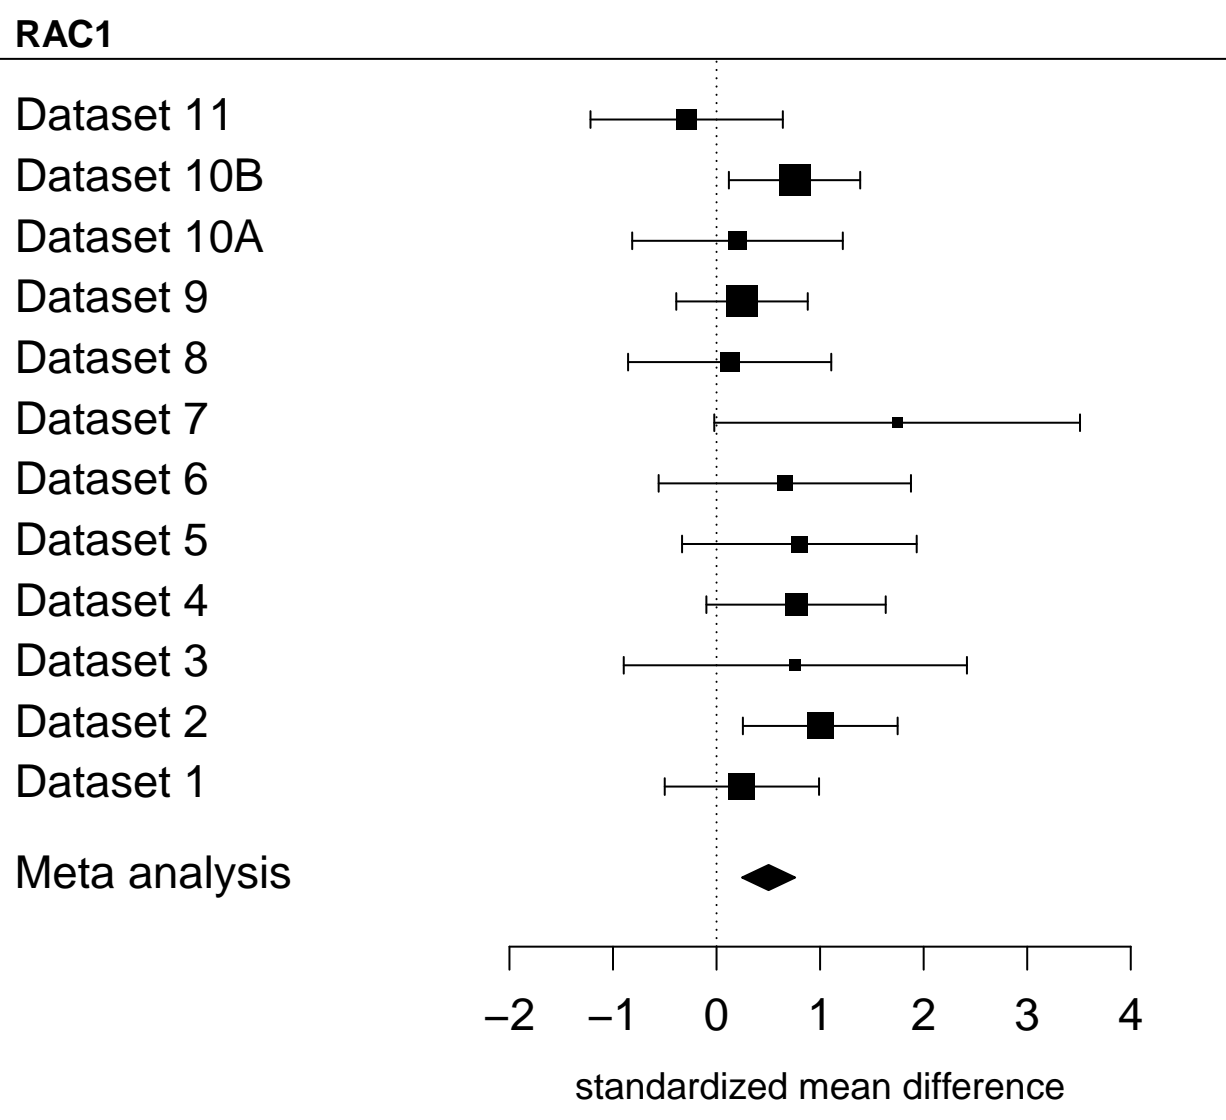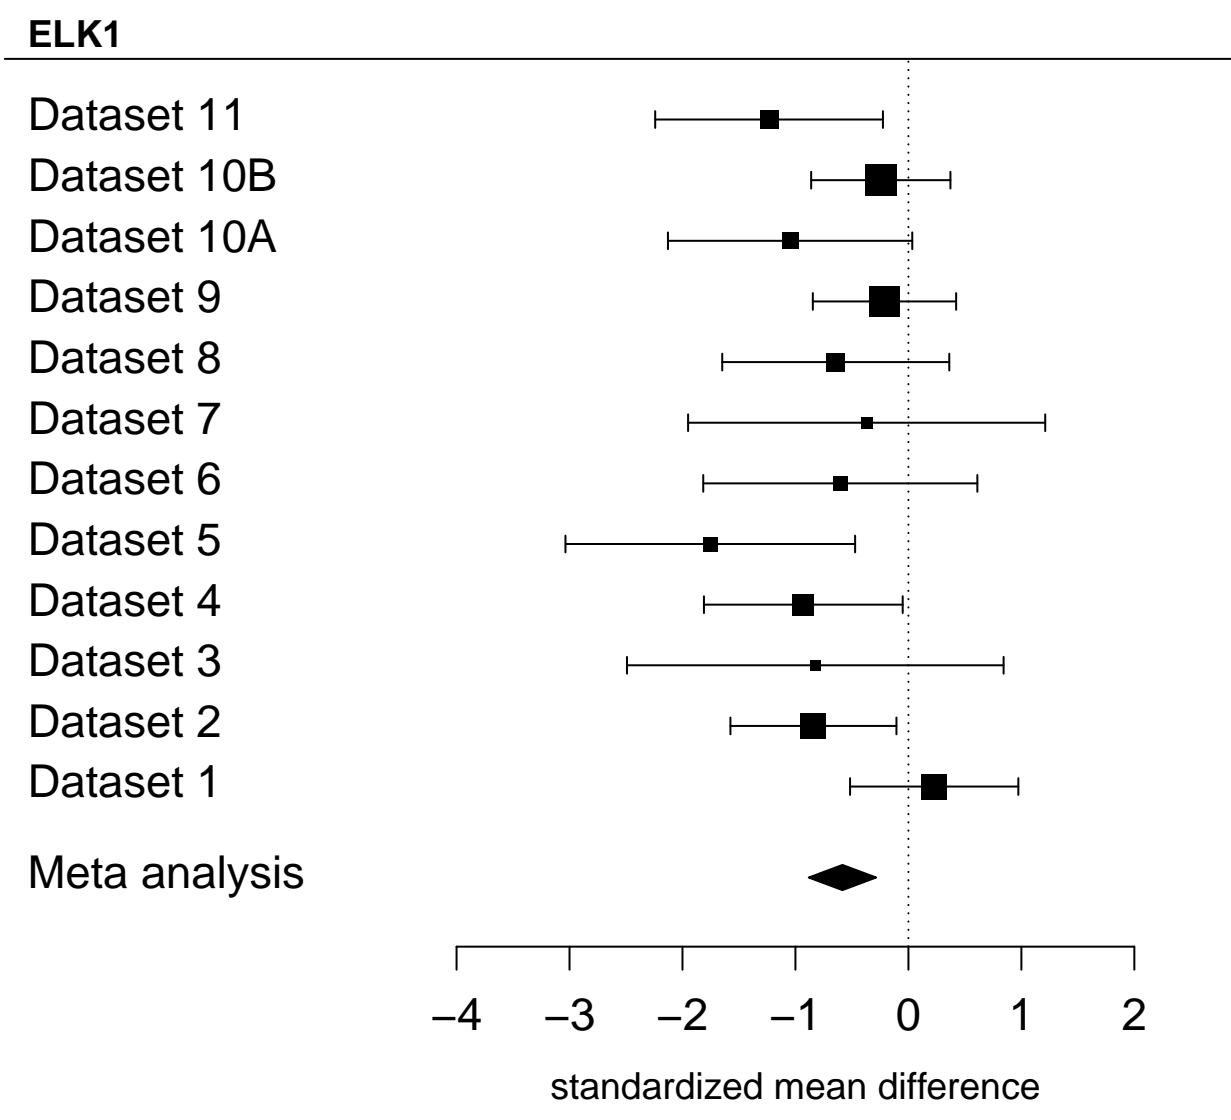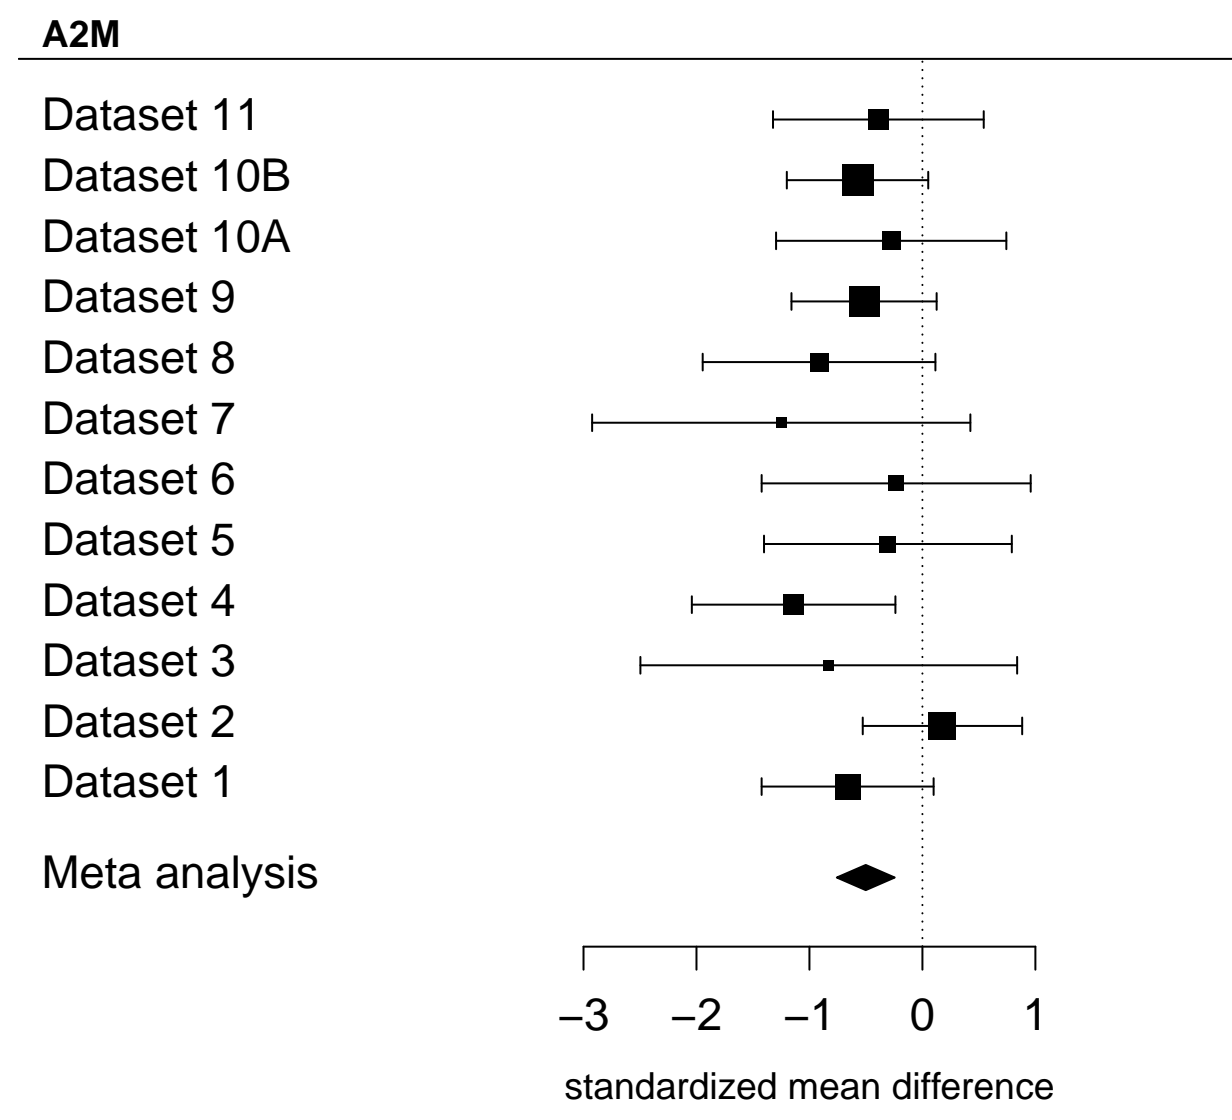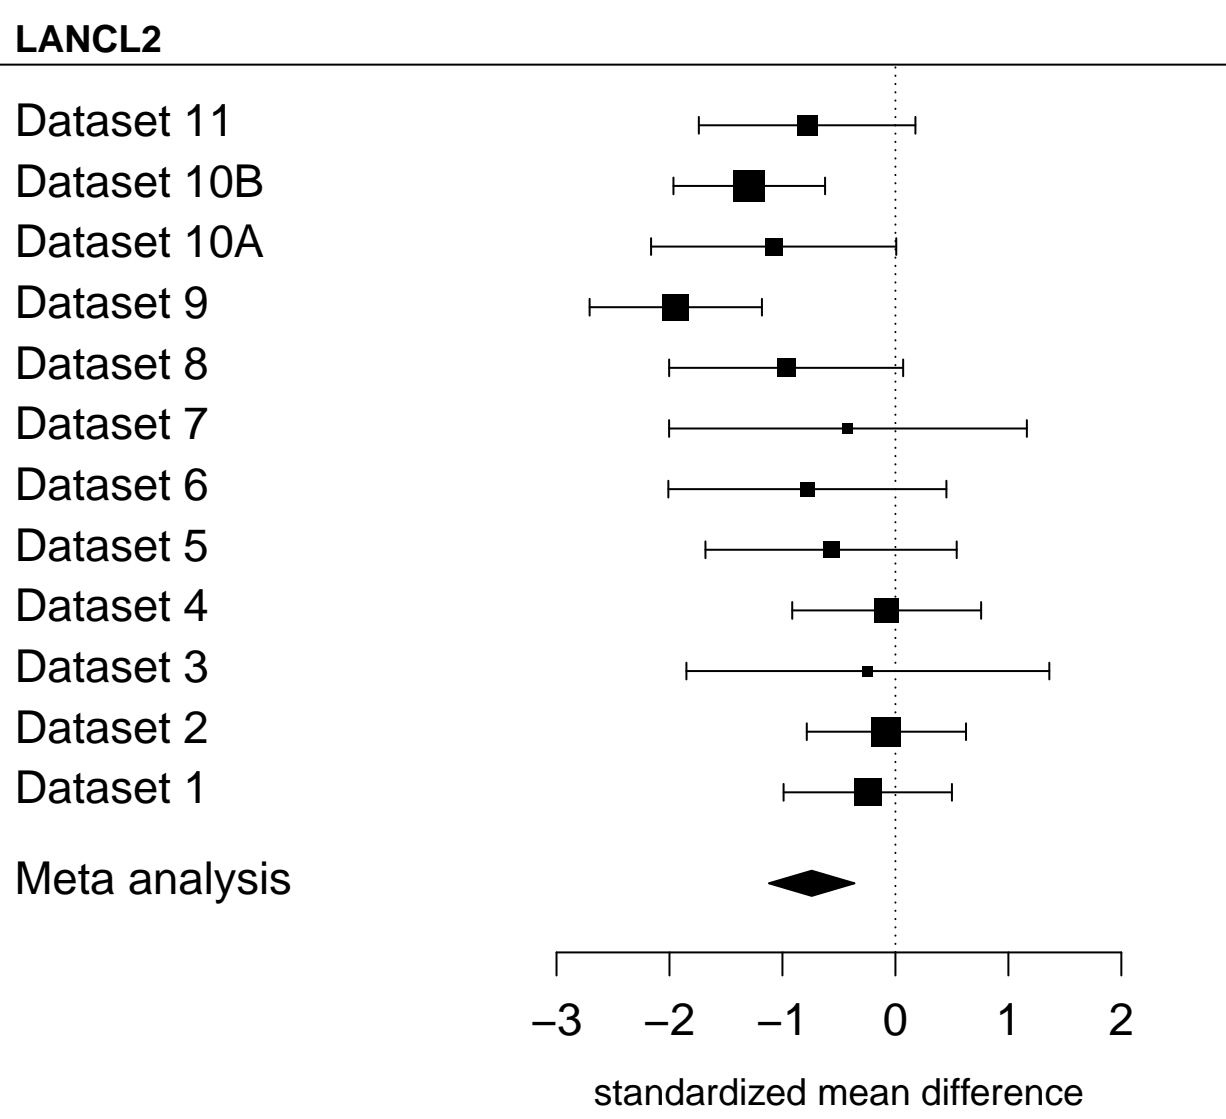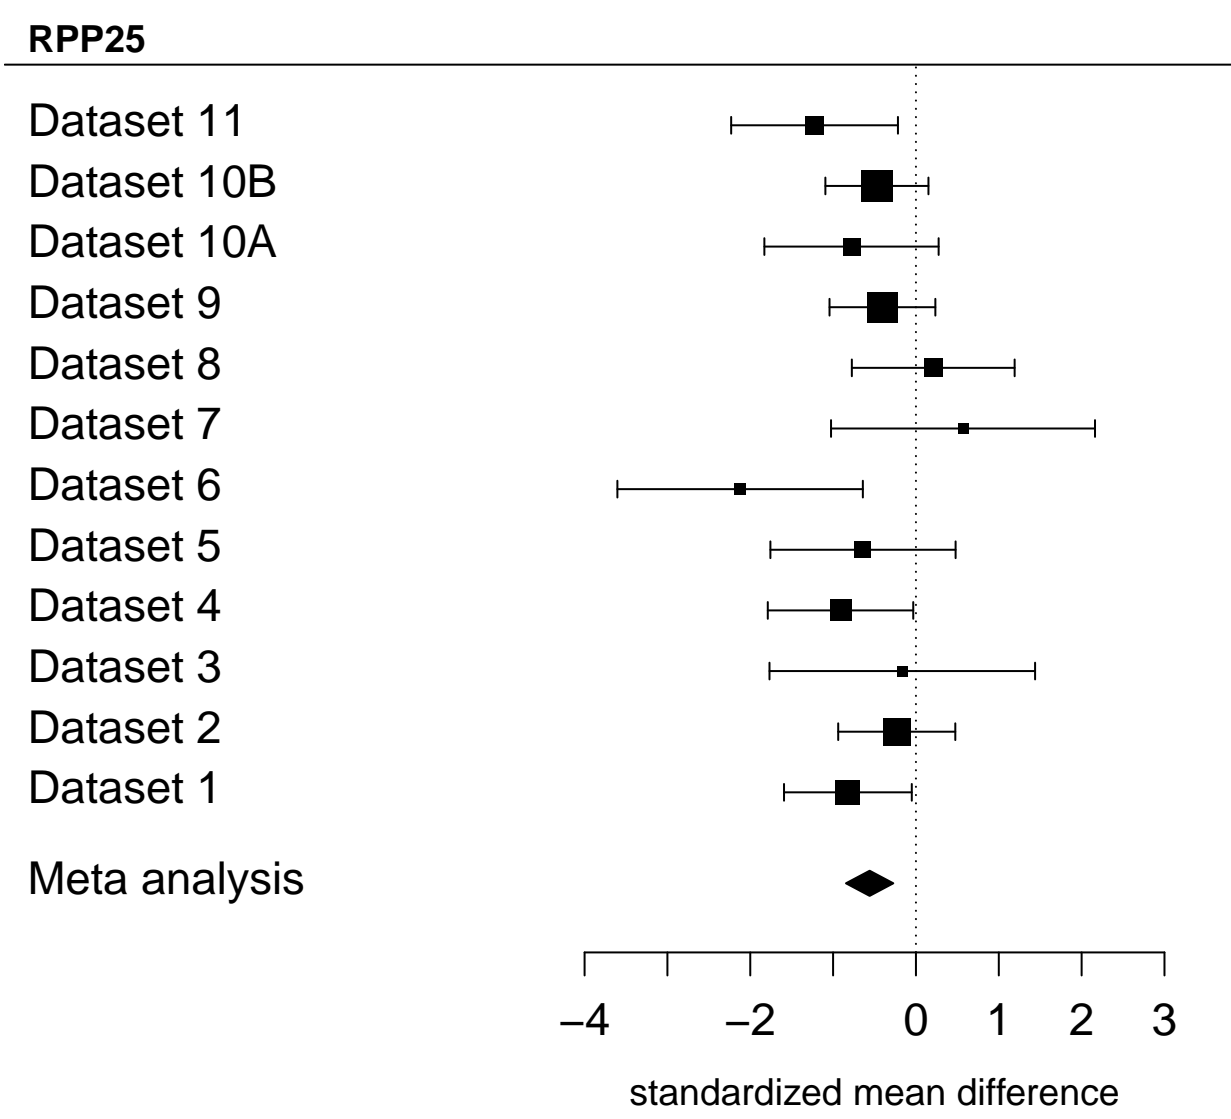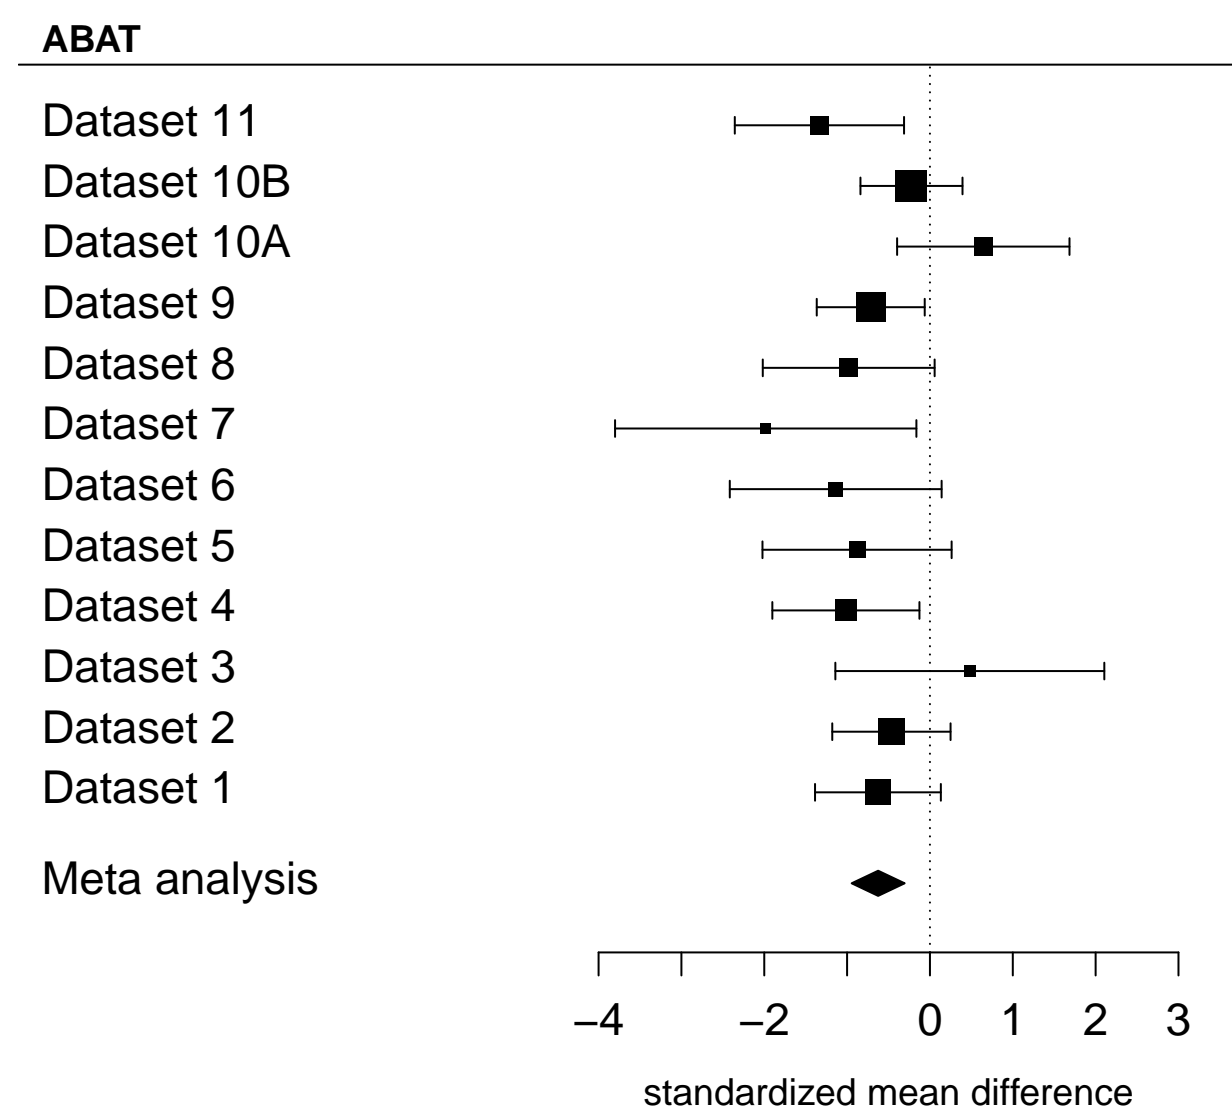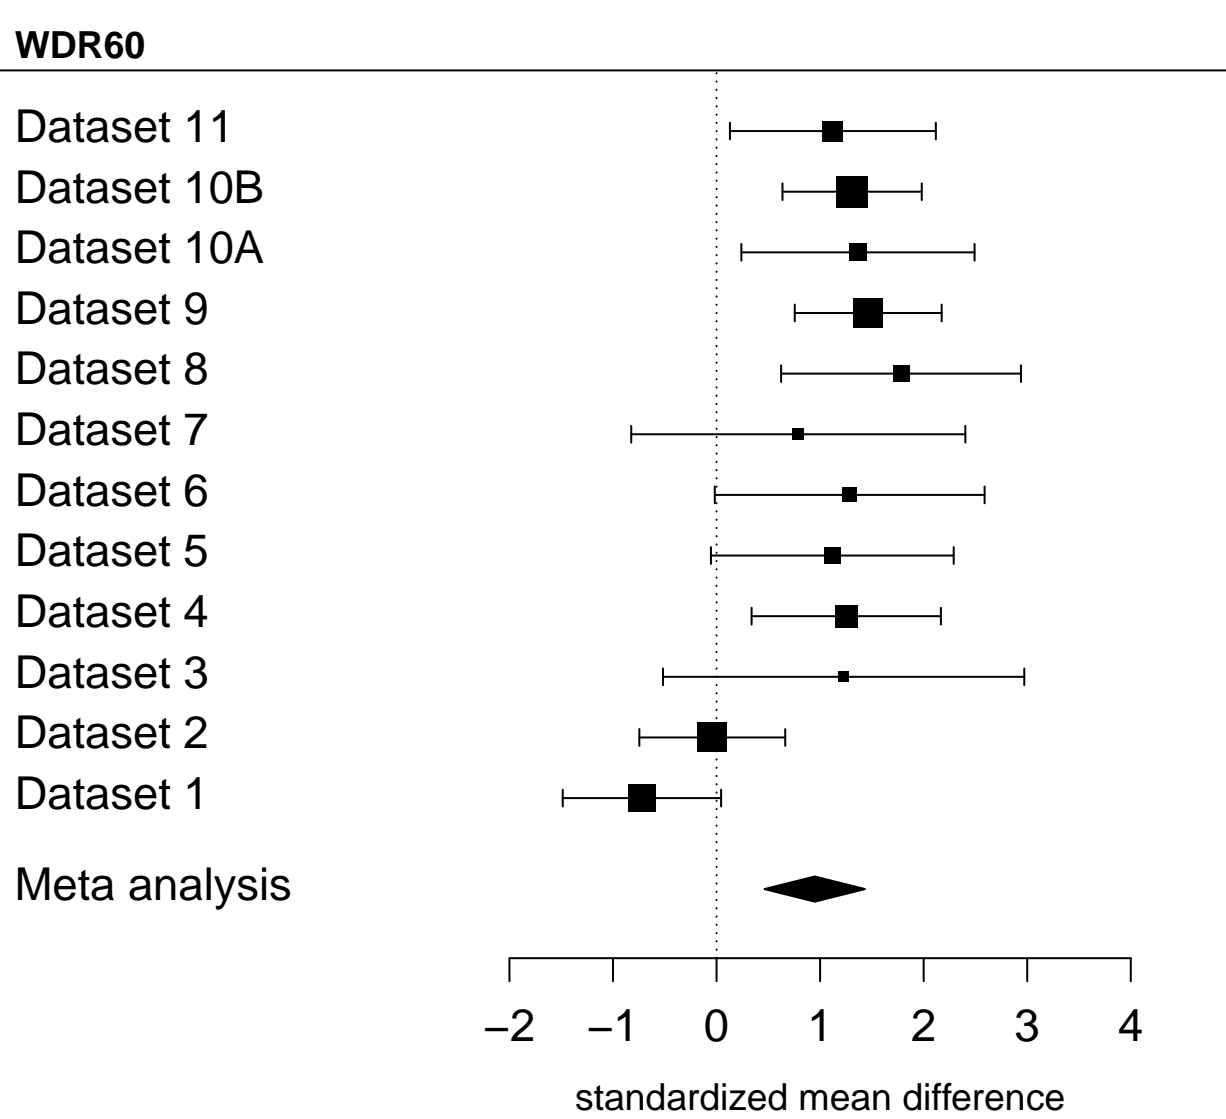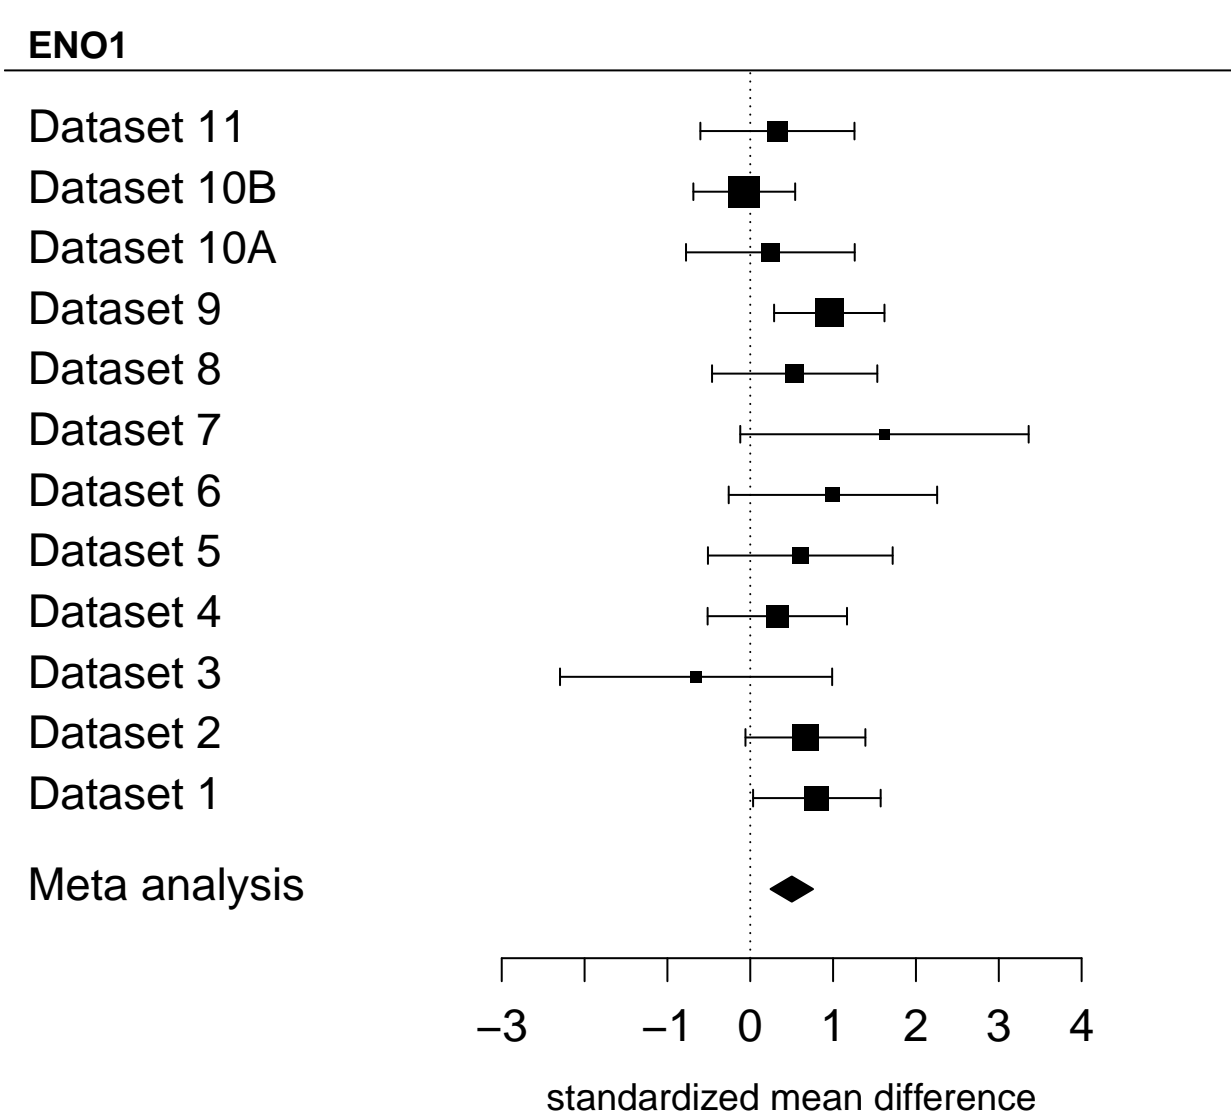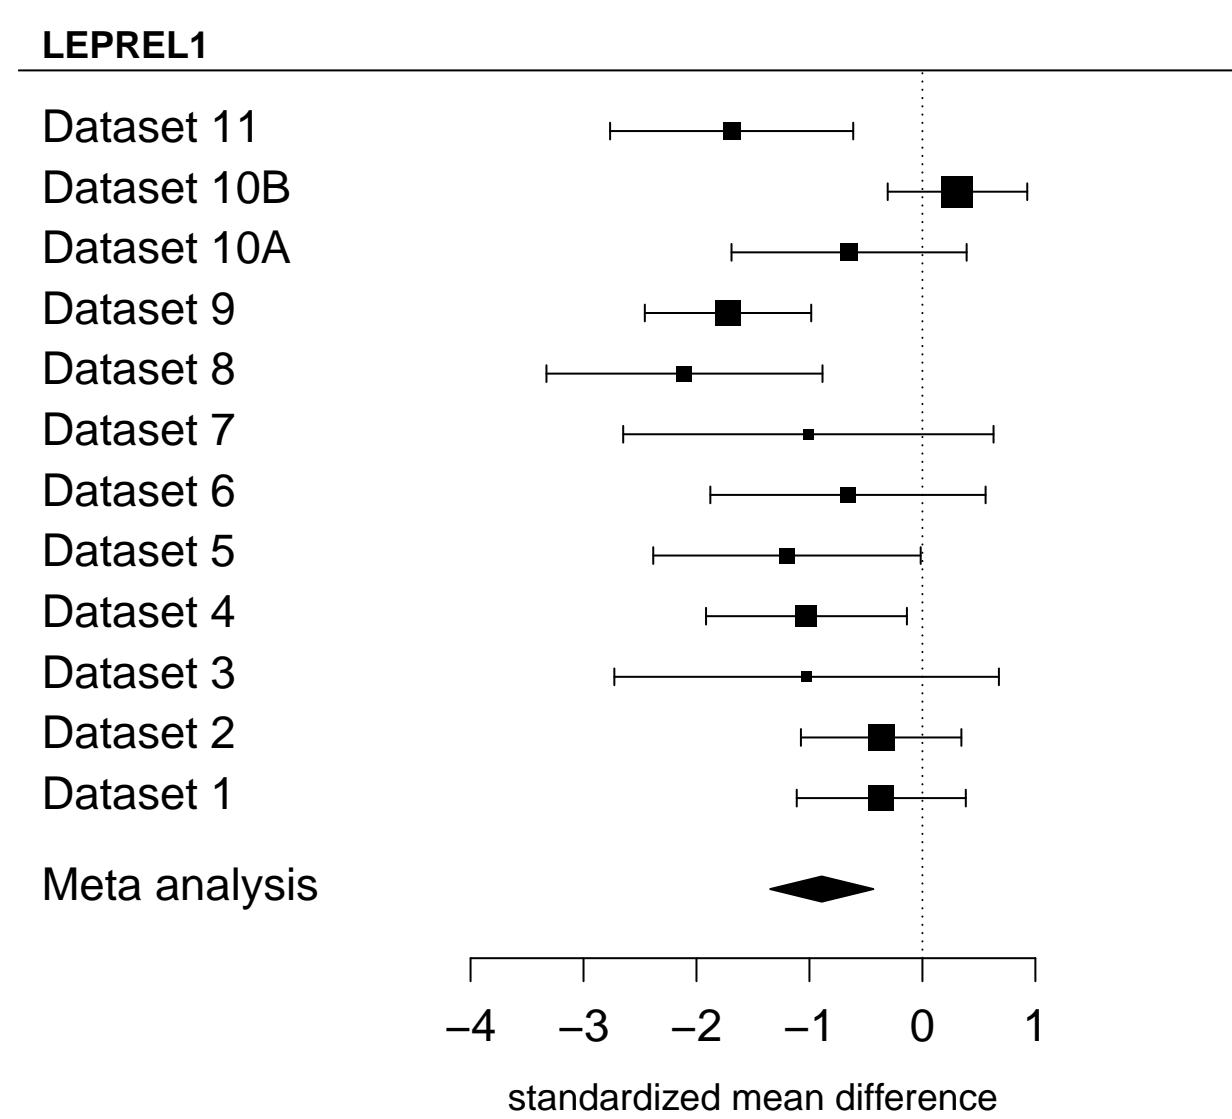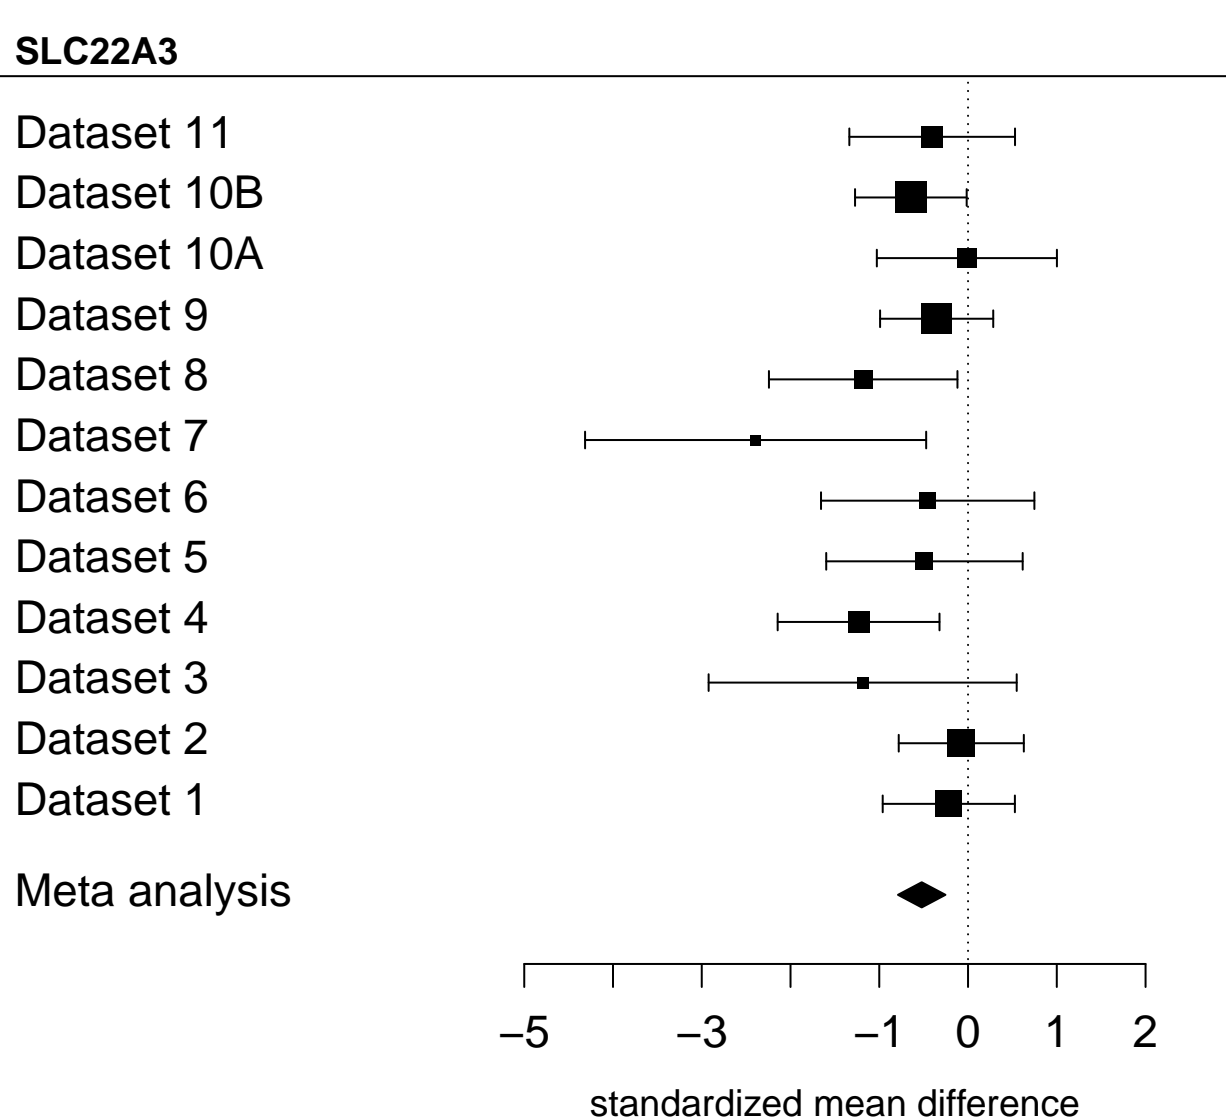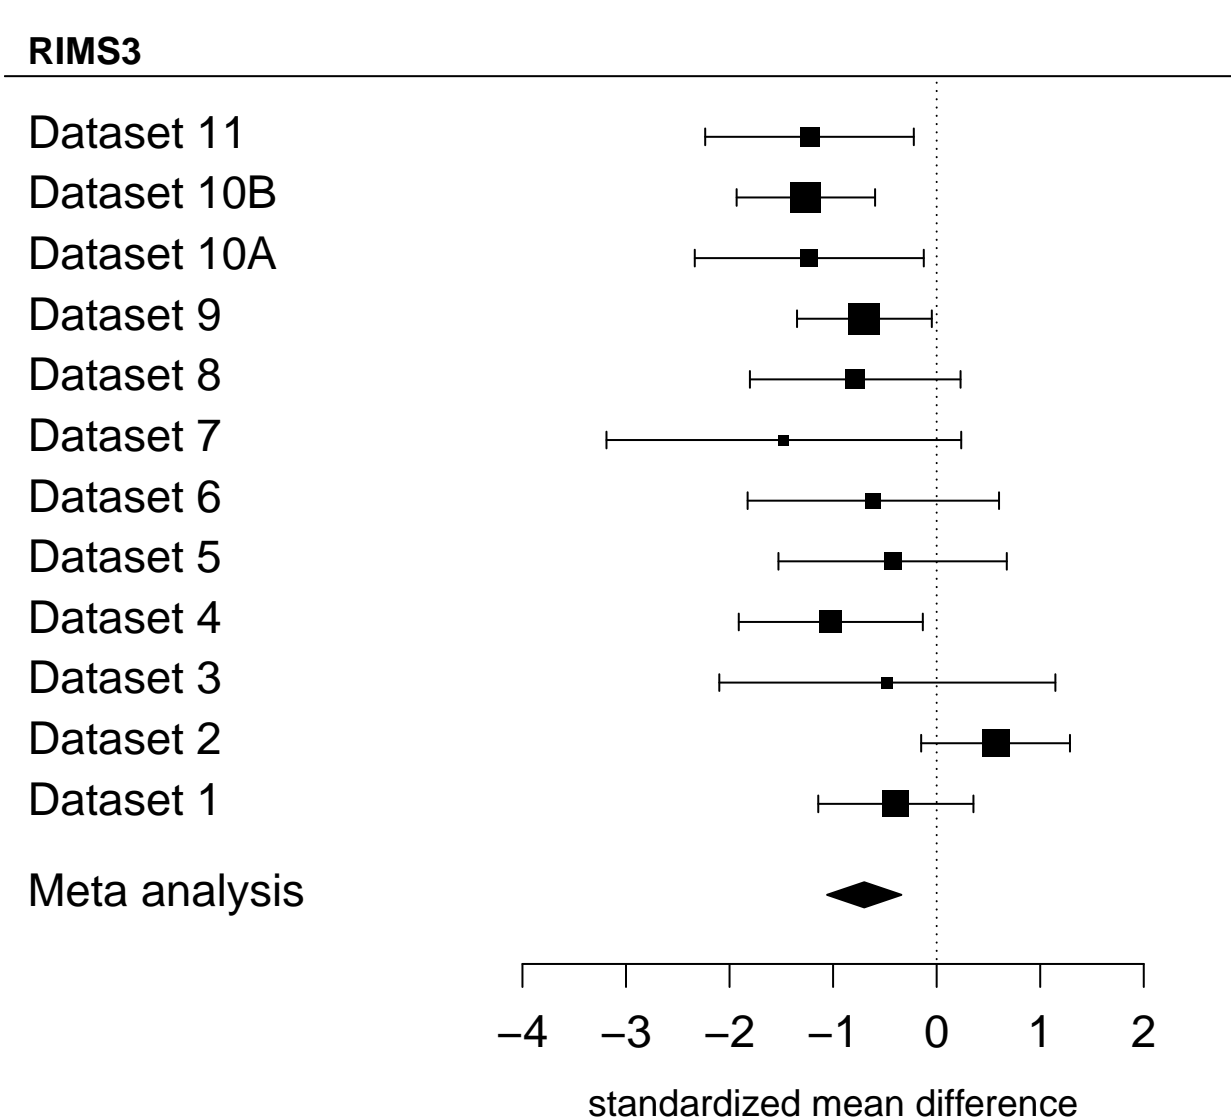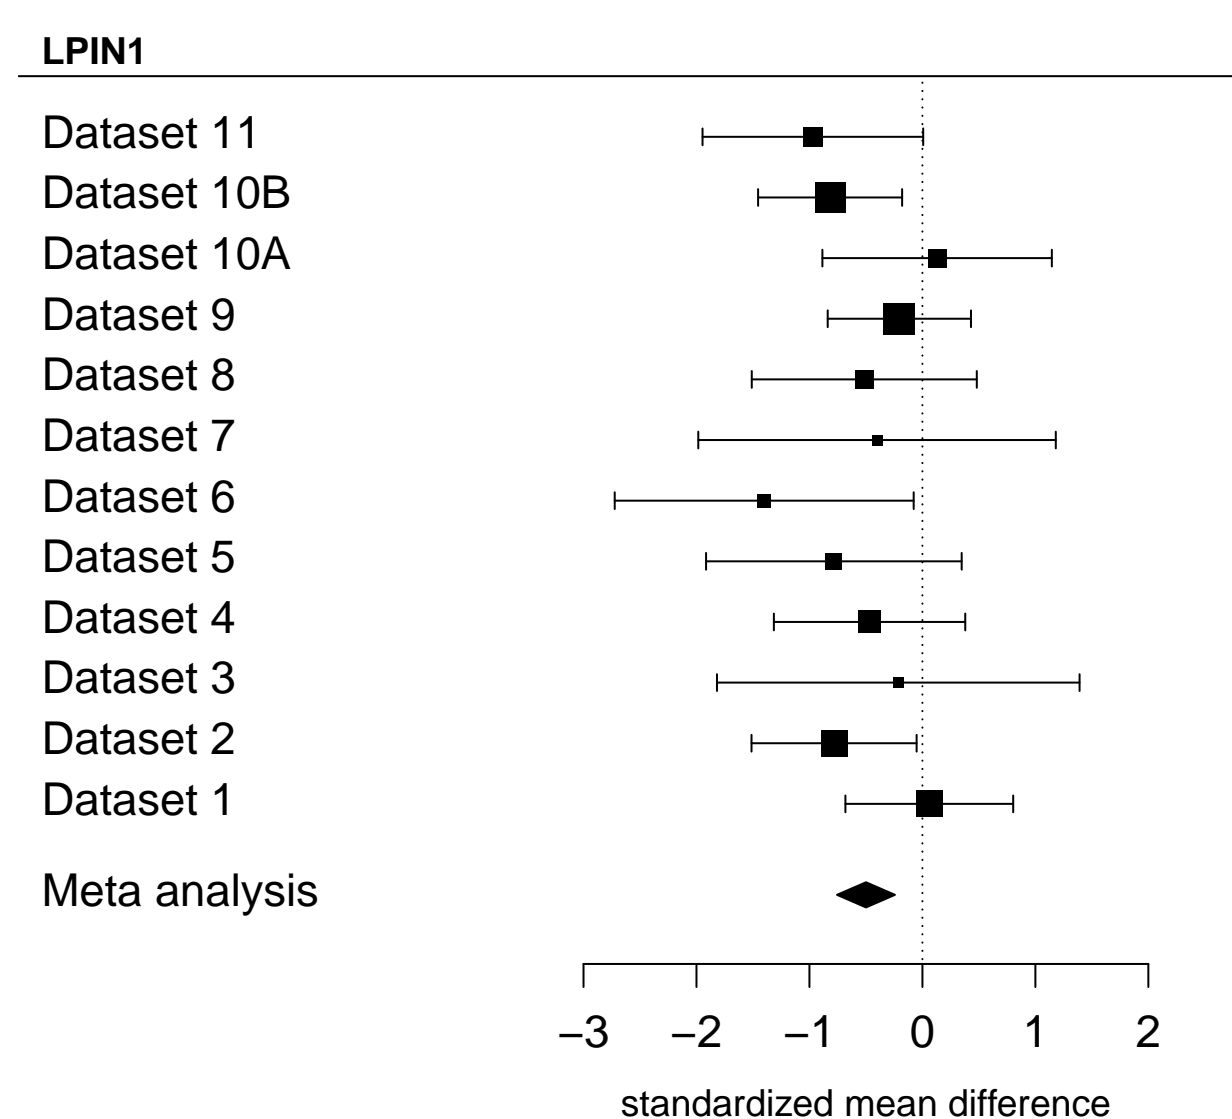

**CEP63**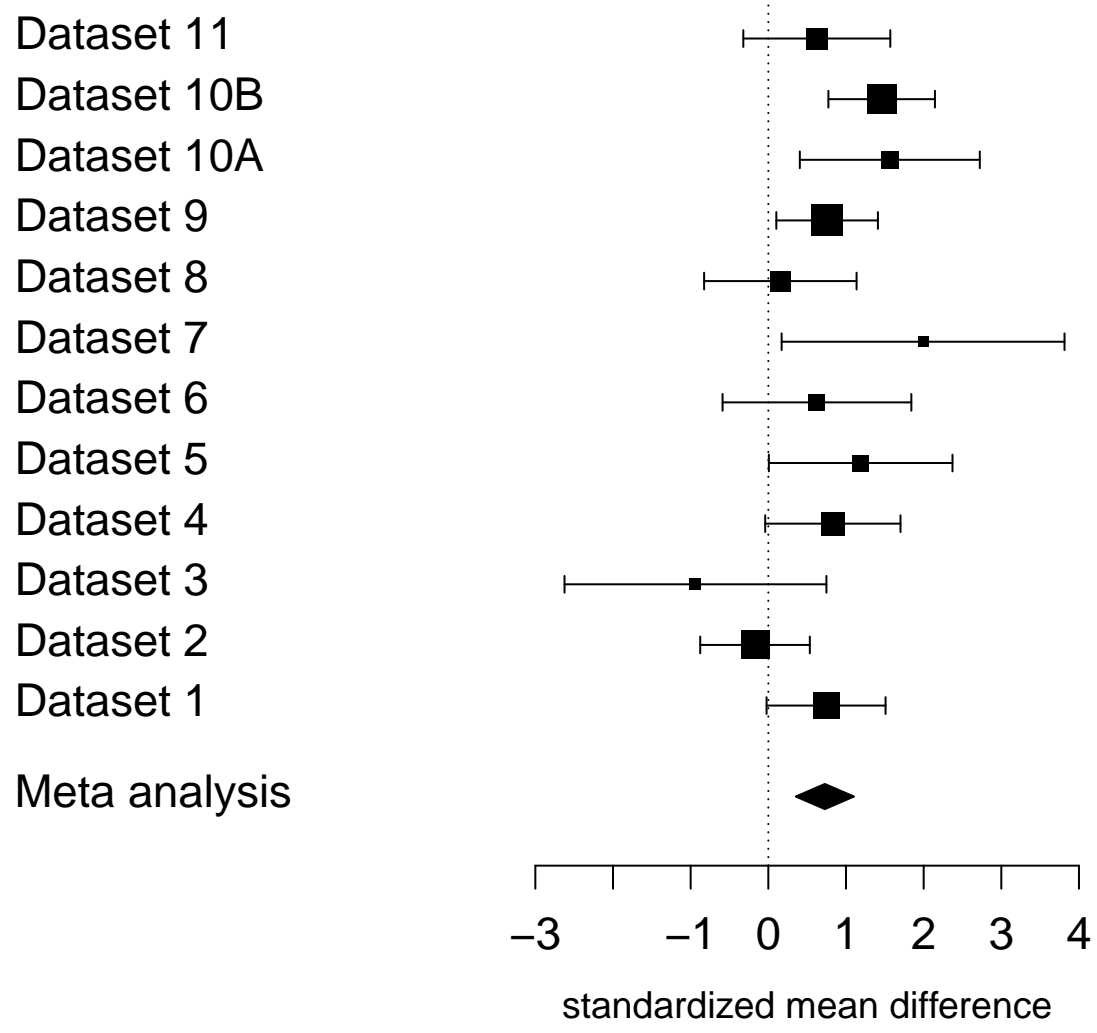**SIK3**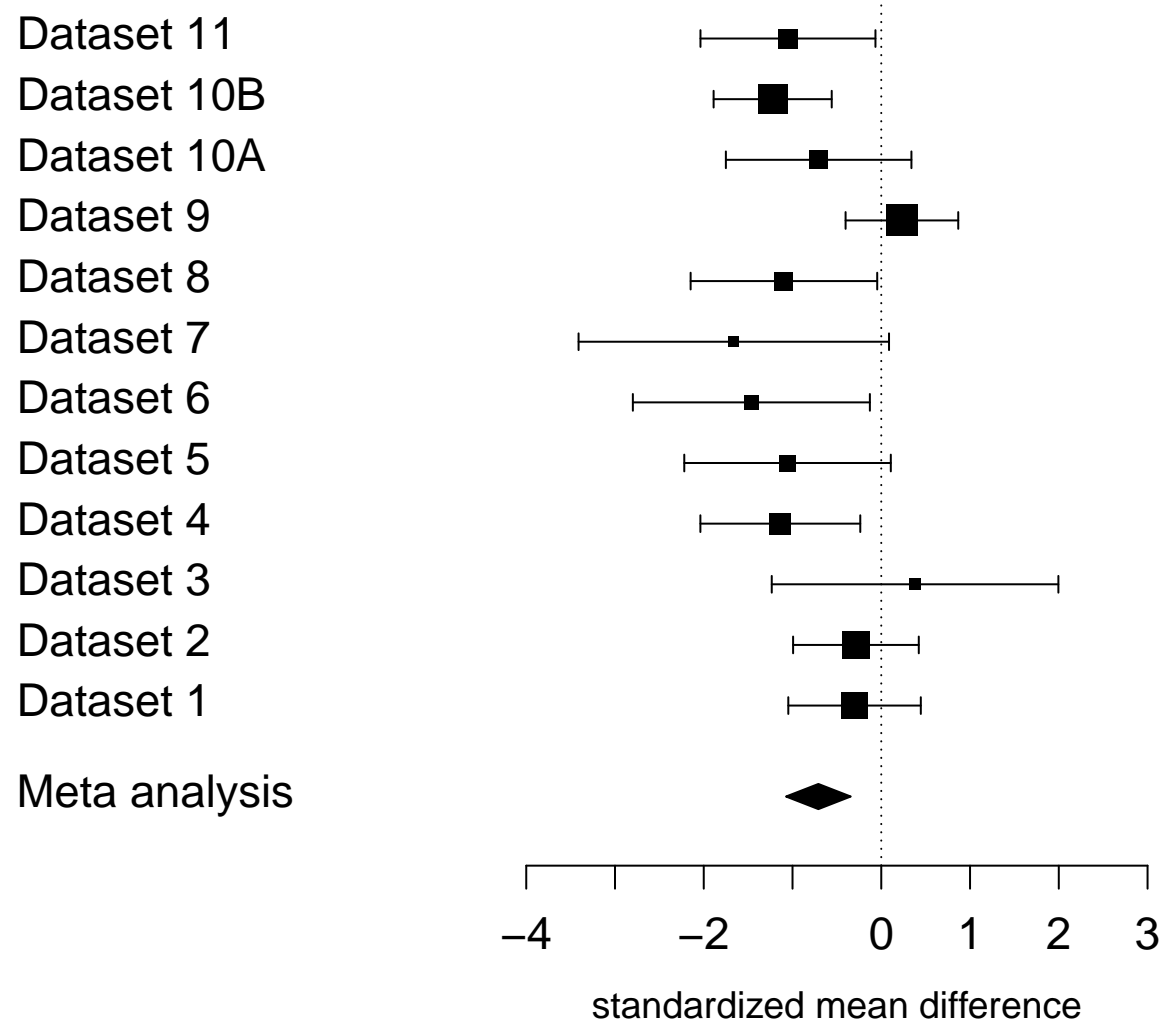**CCK**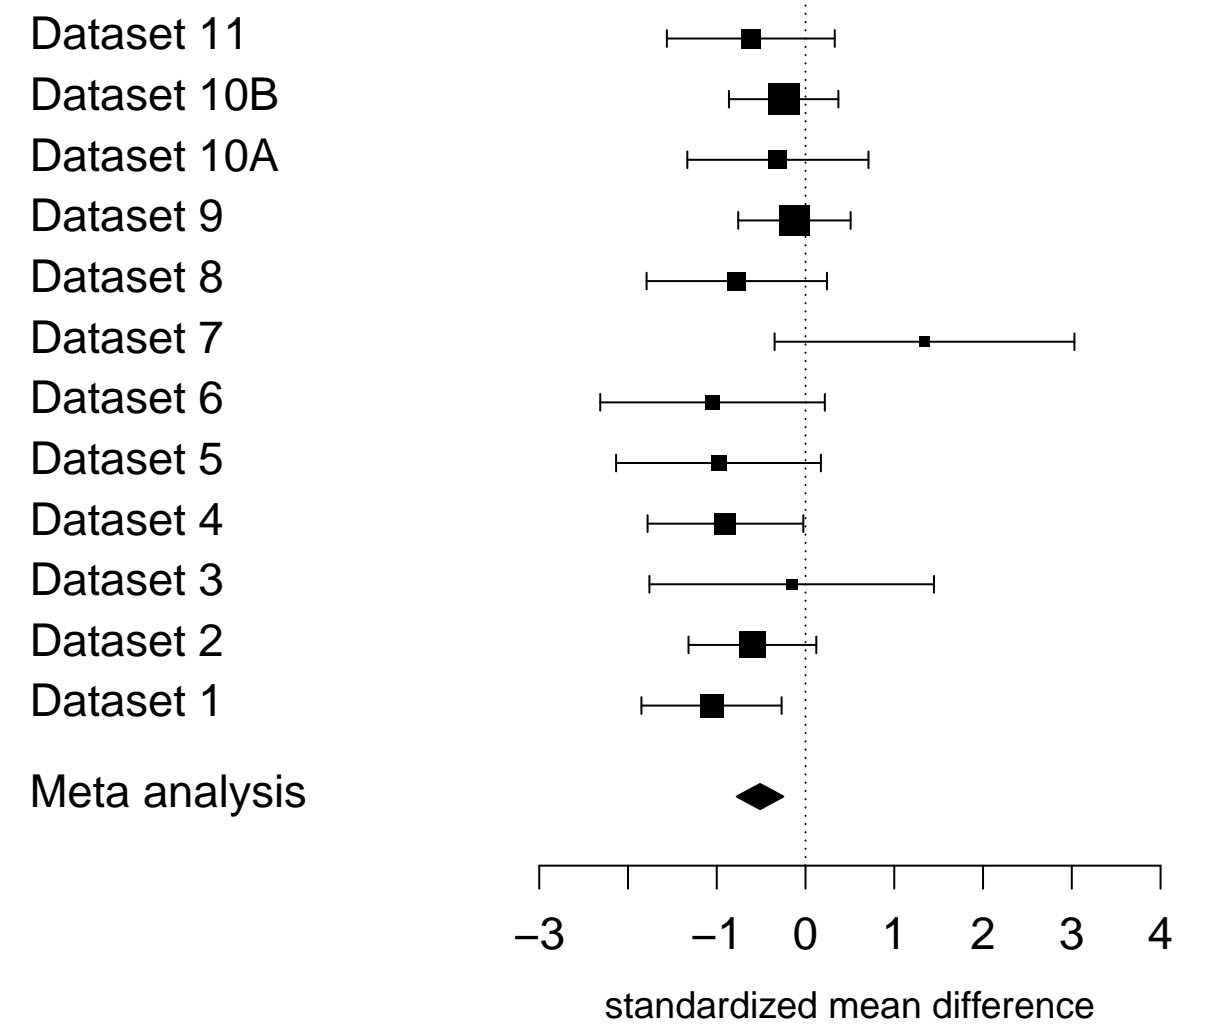**CCBL2**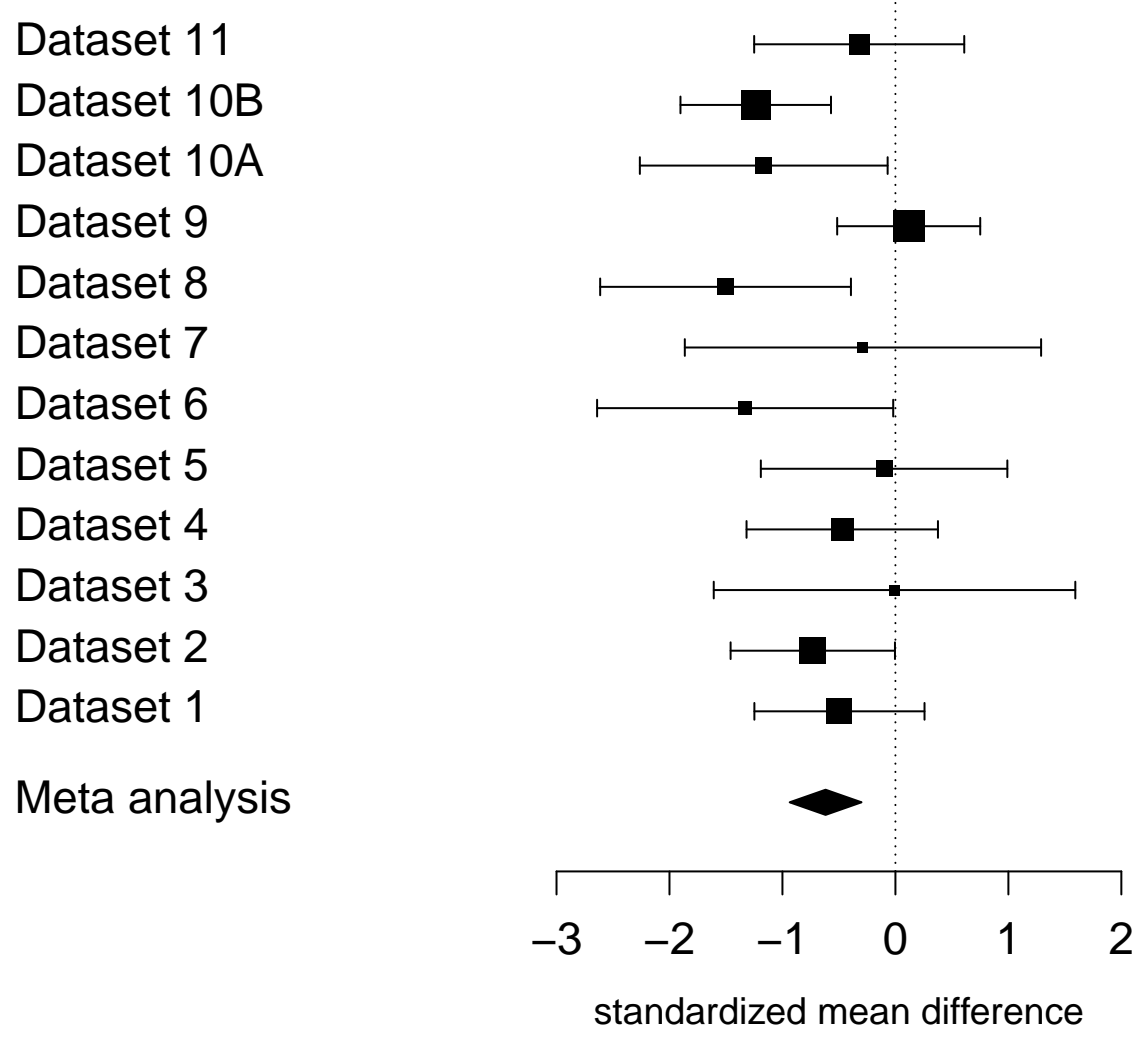**ITPR3**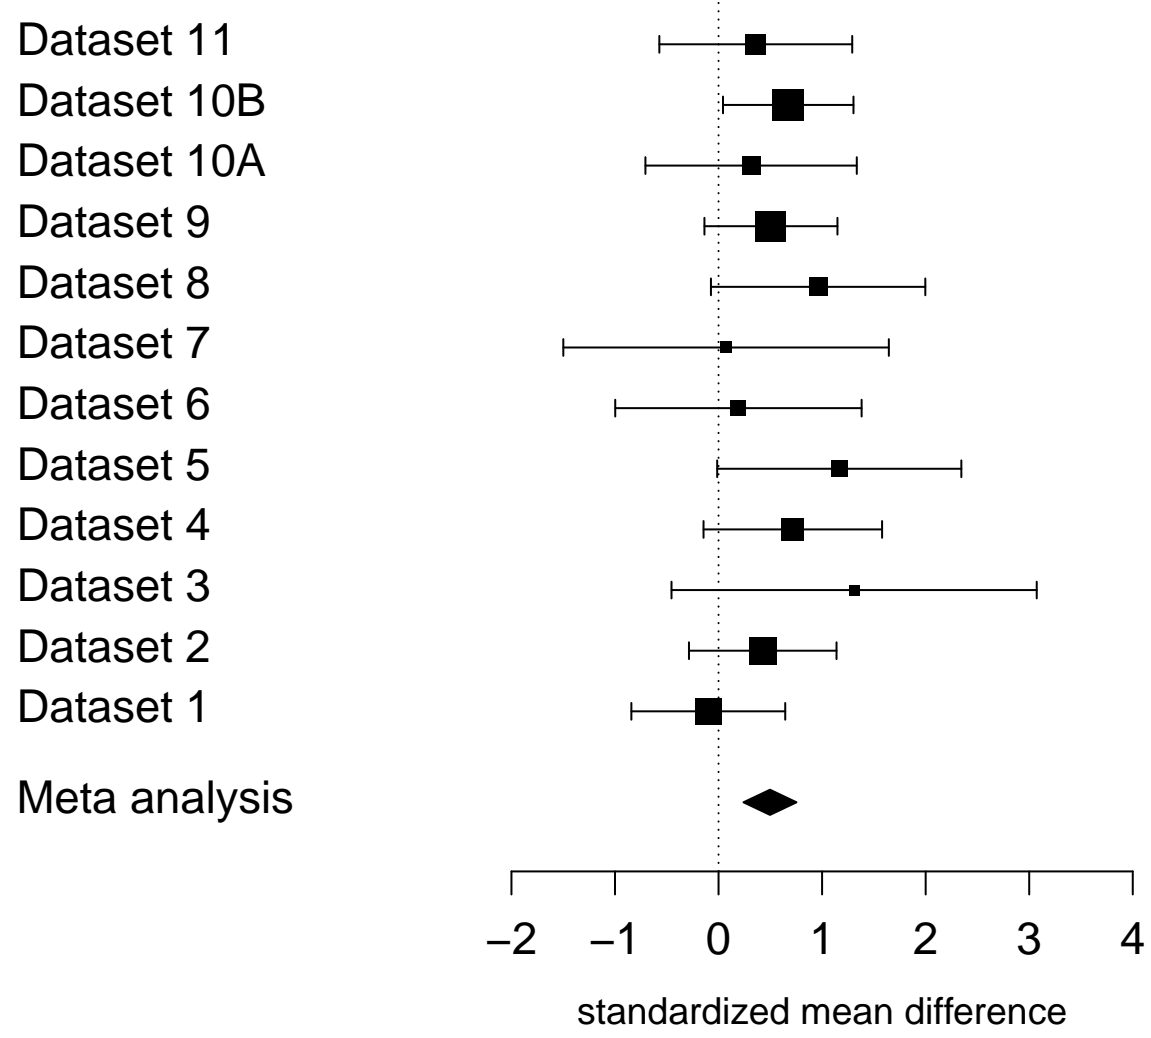**ABCG1**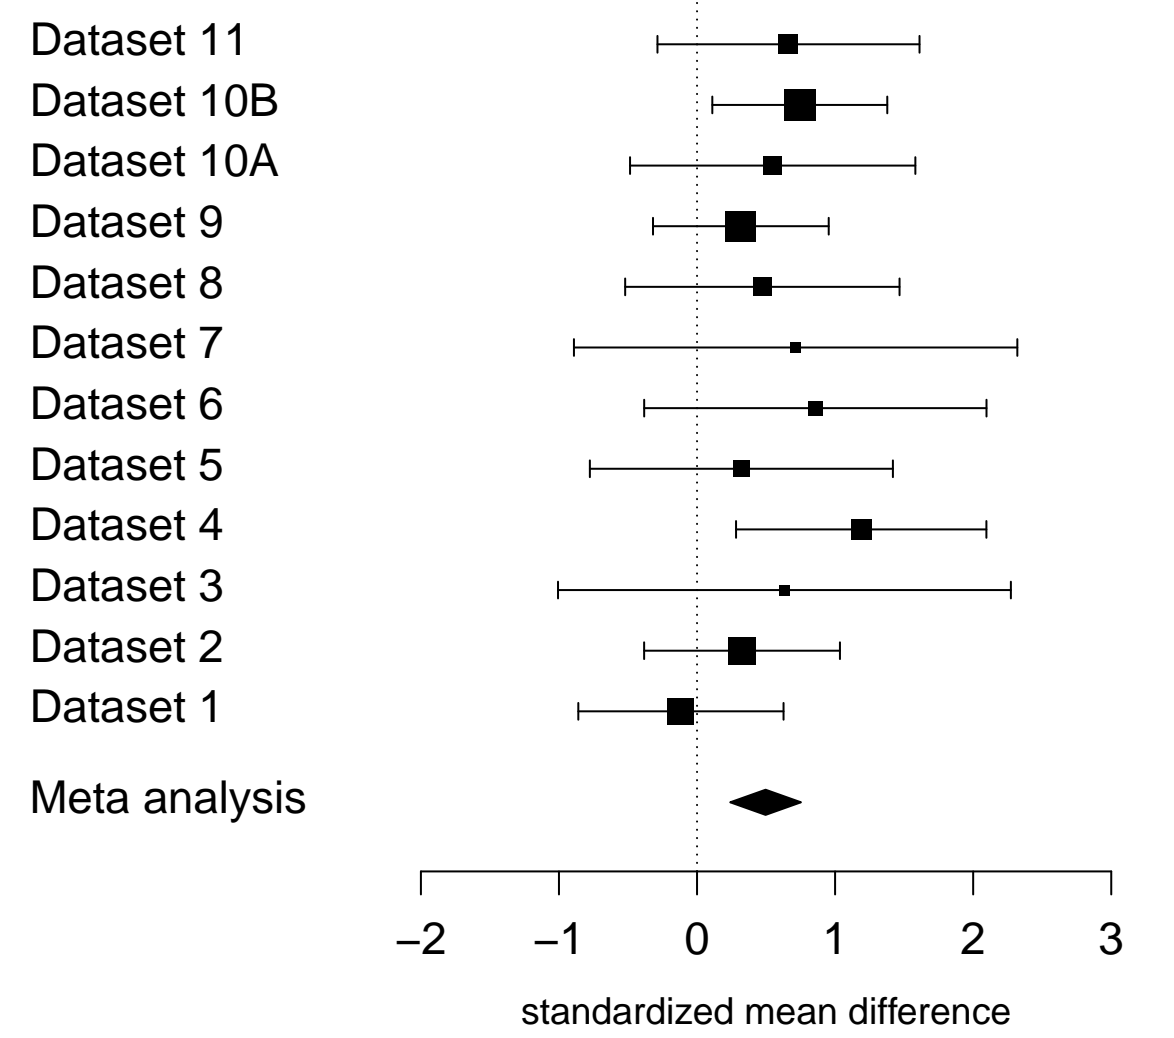**CREBBP**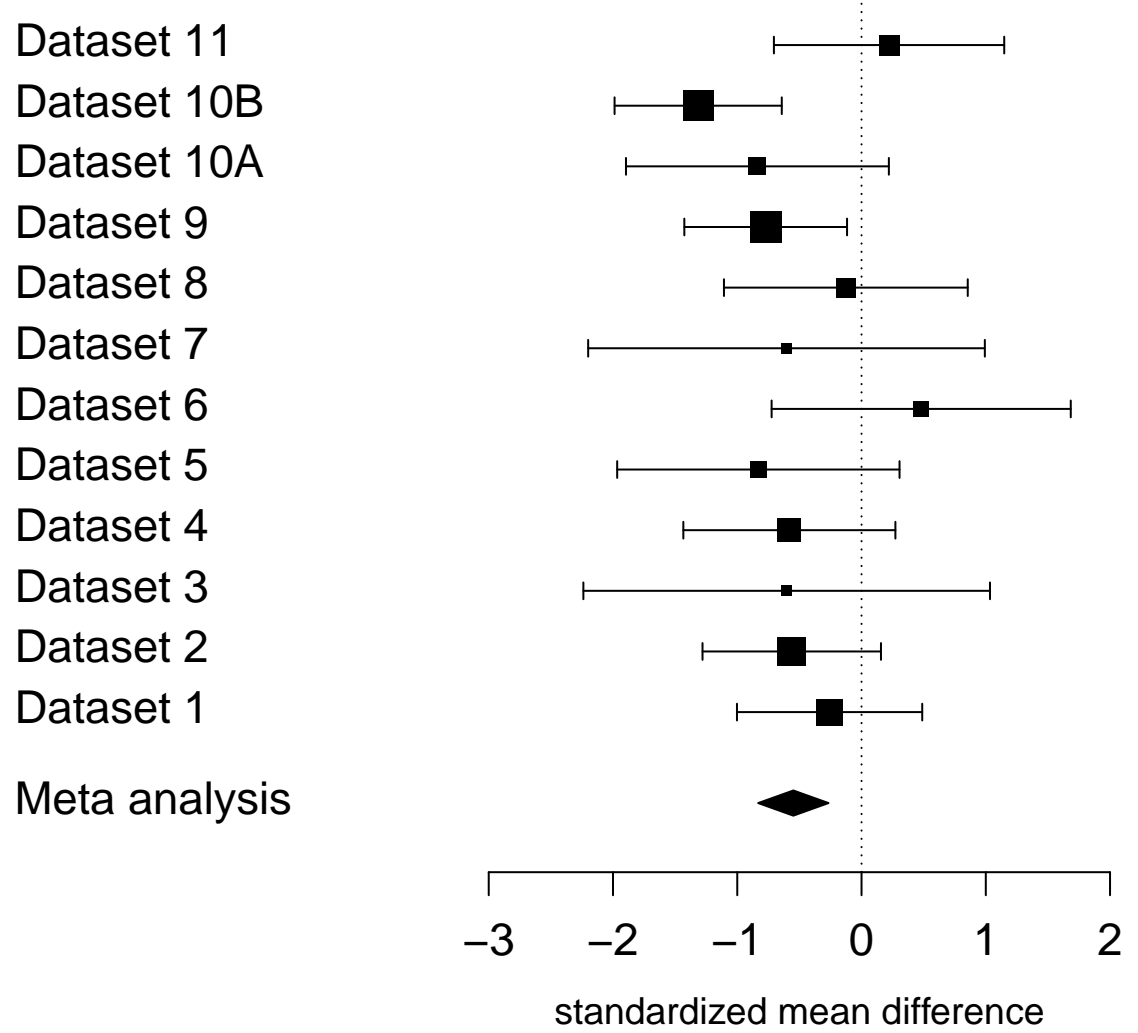**MAP3K8**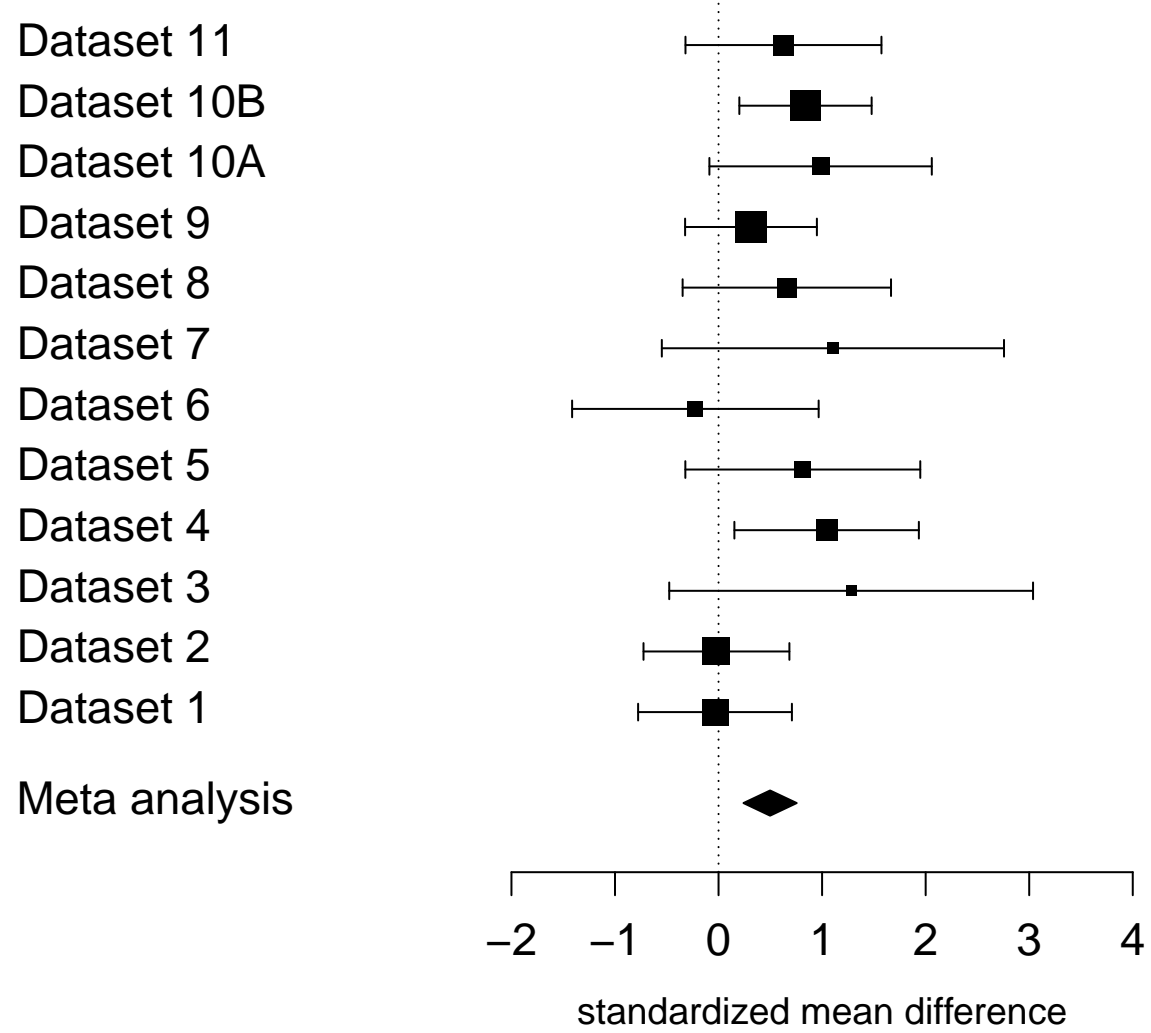**PTPRR**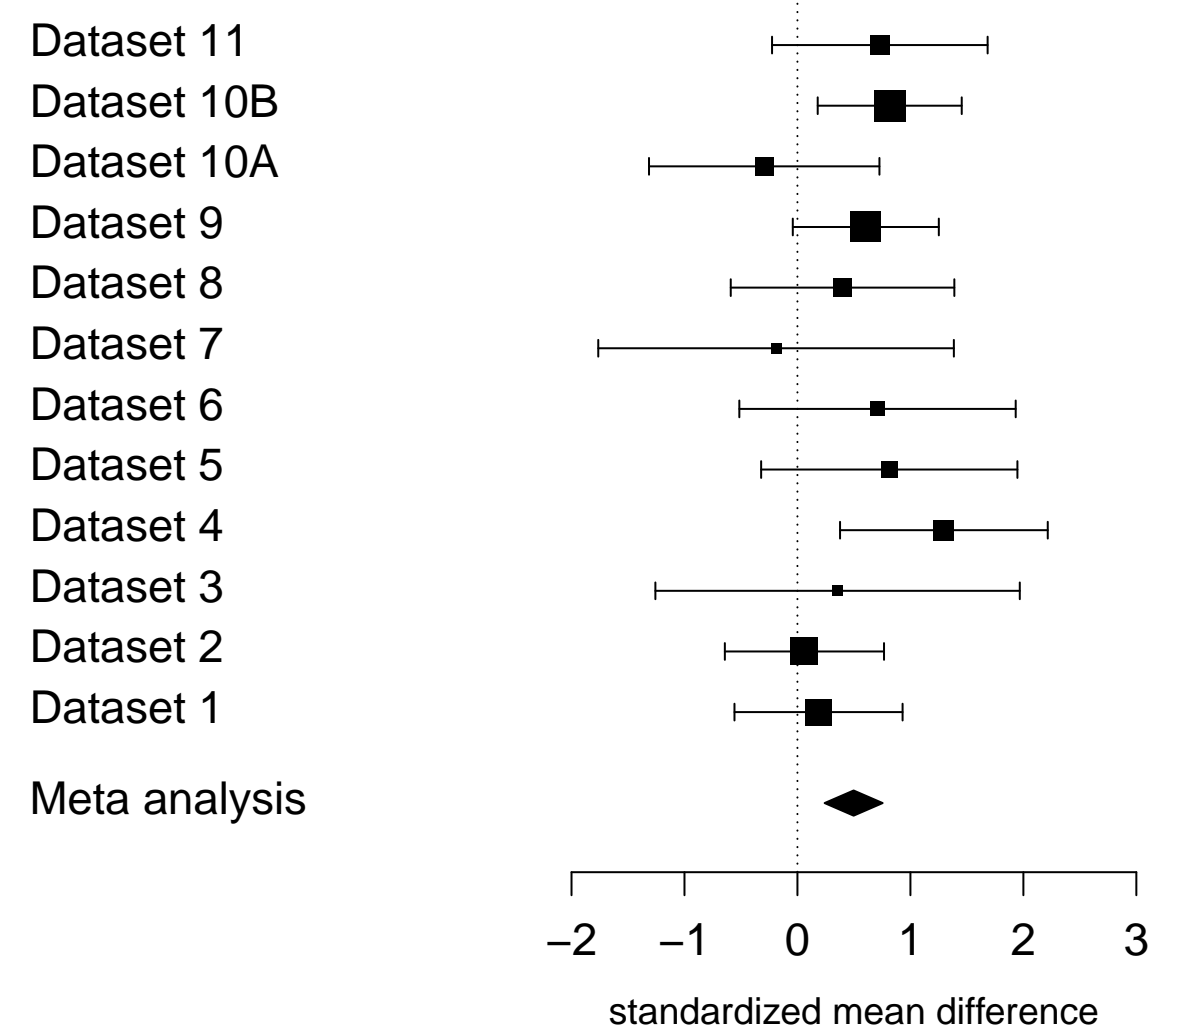**ISG15**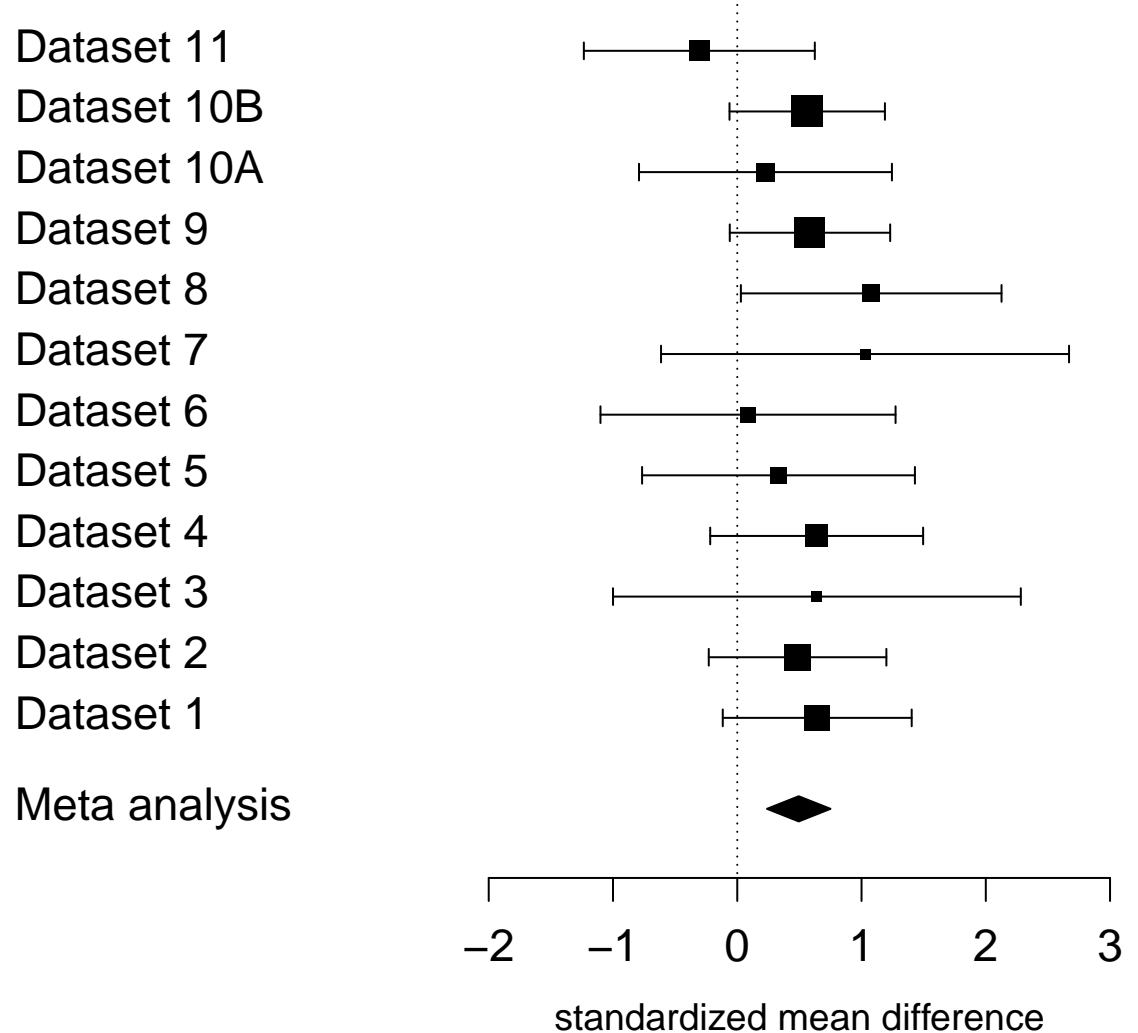**DPYD**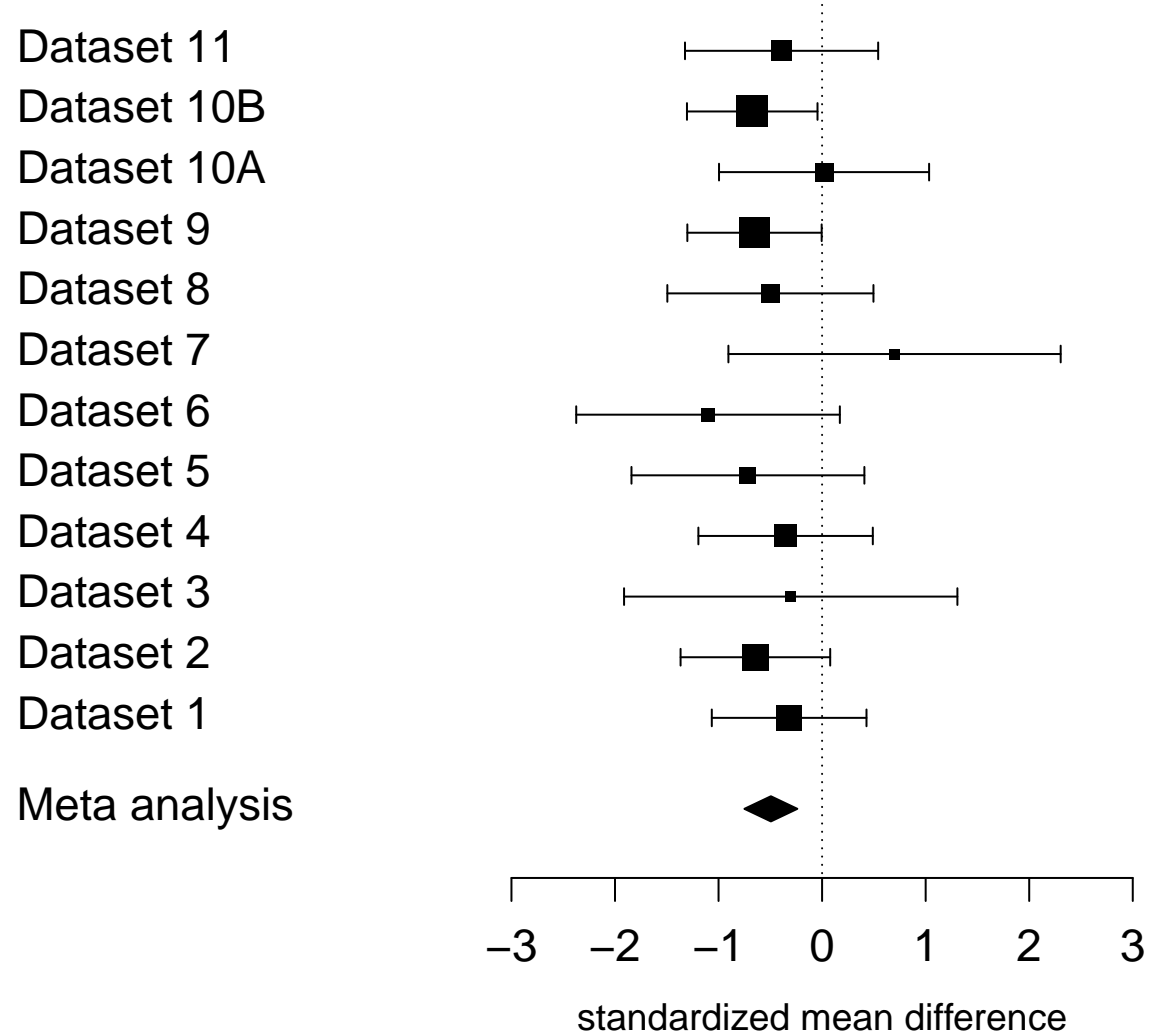**GSN**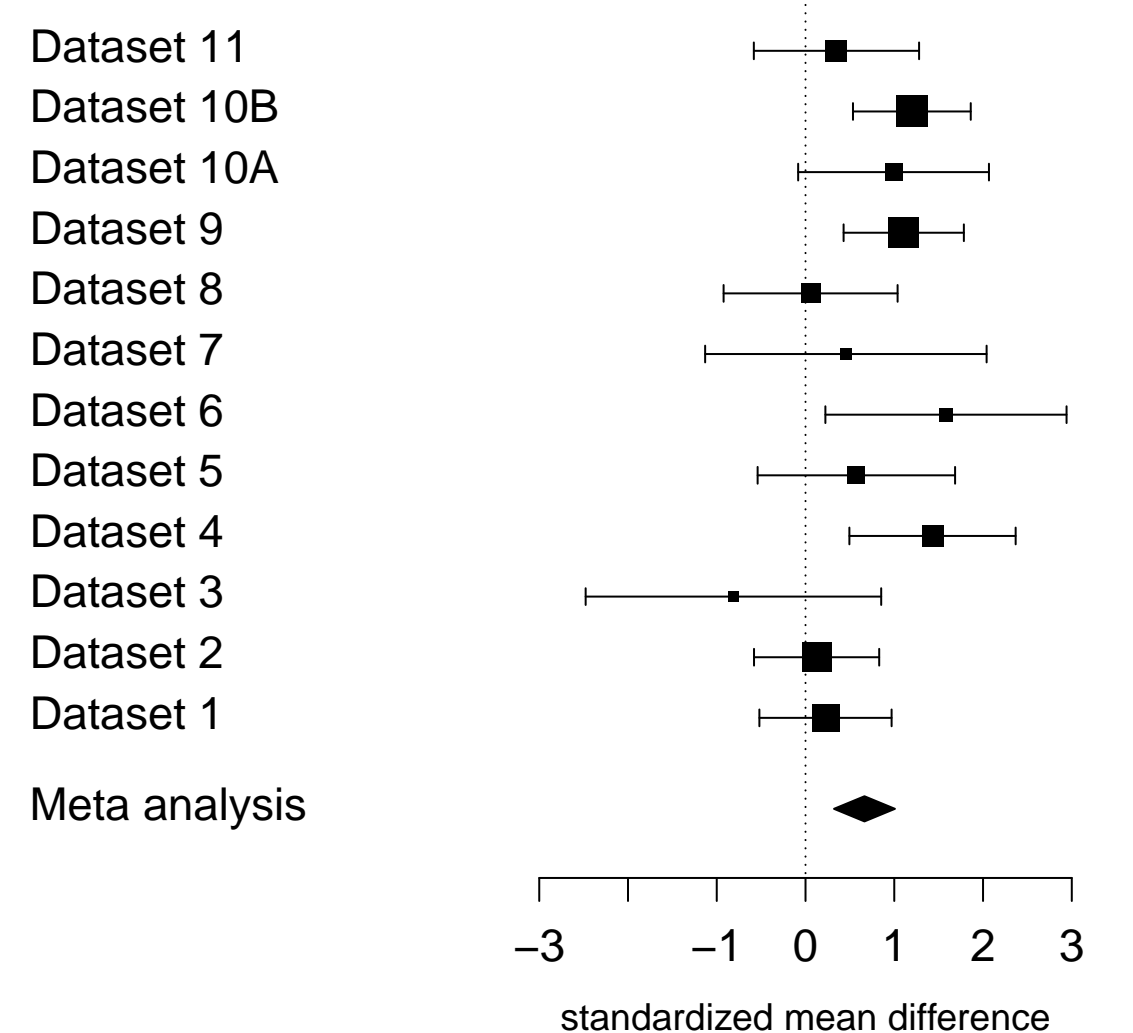

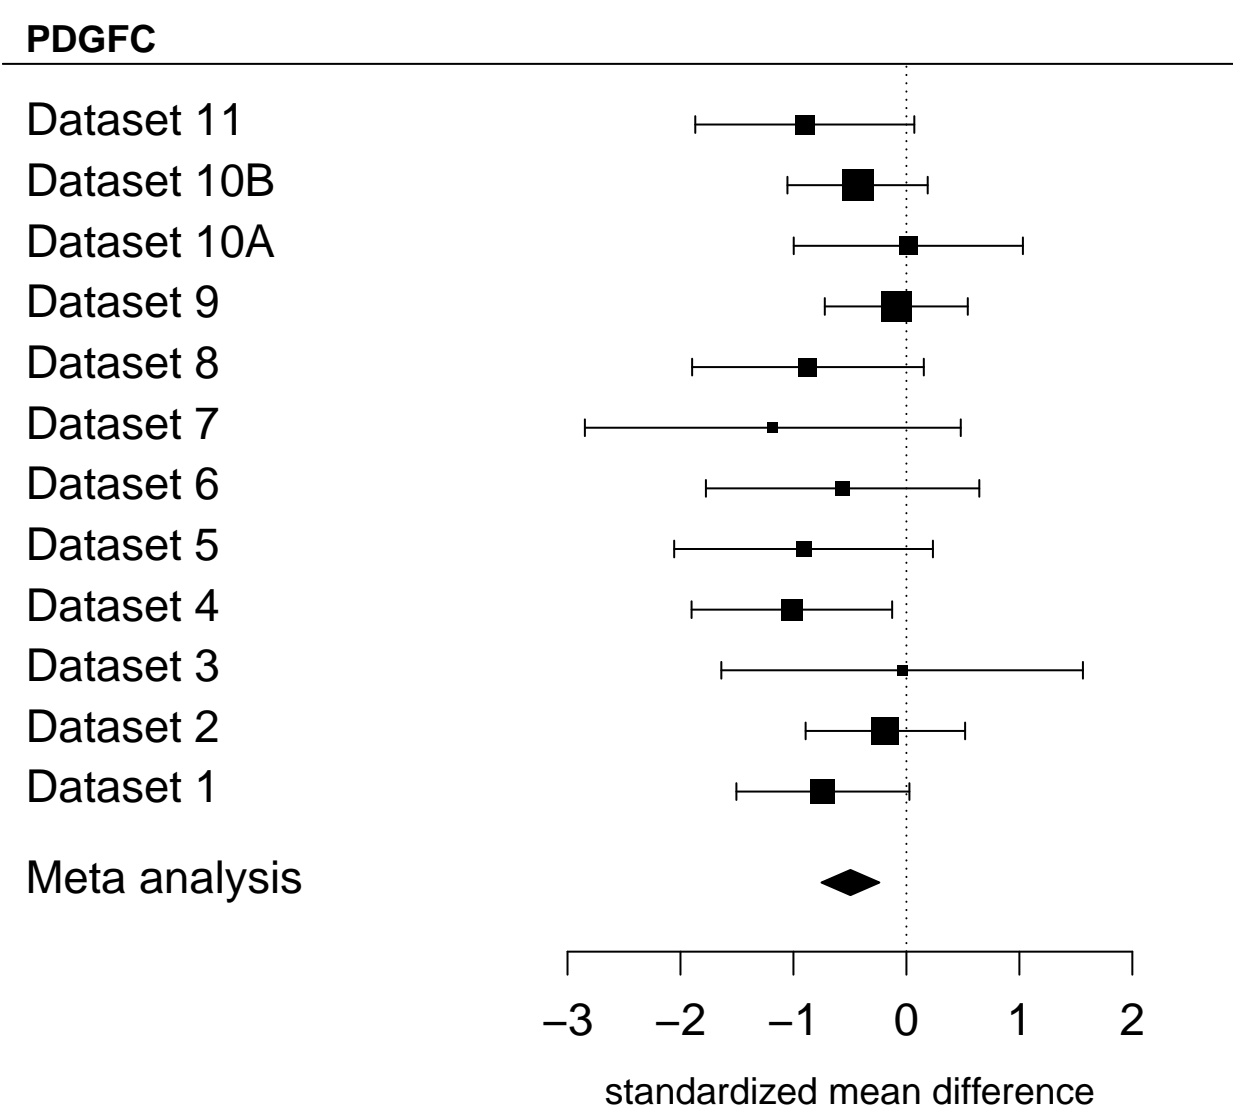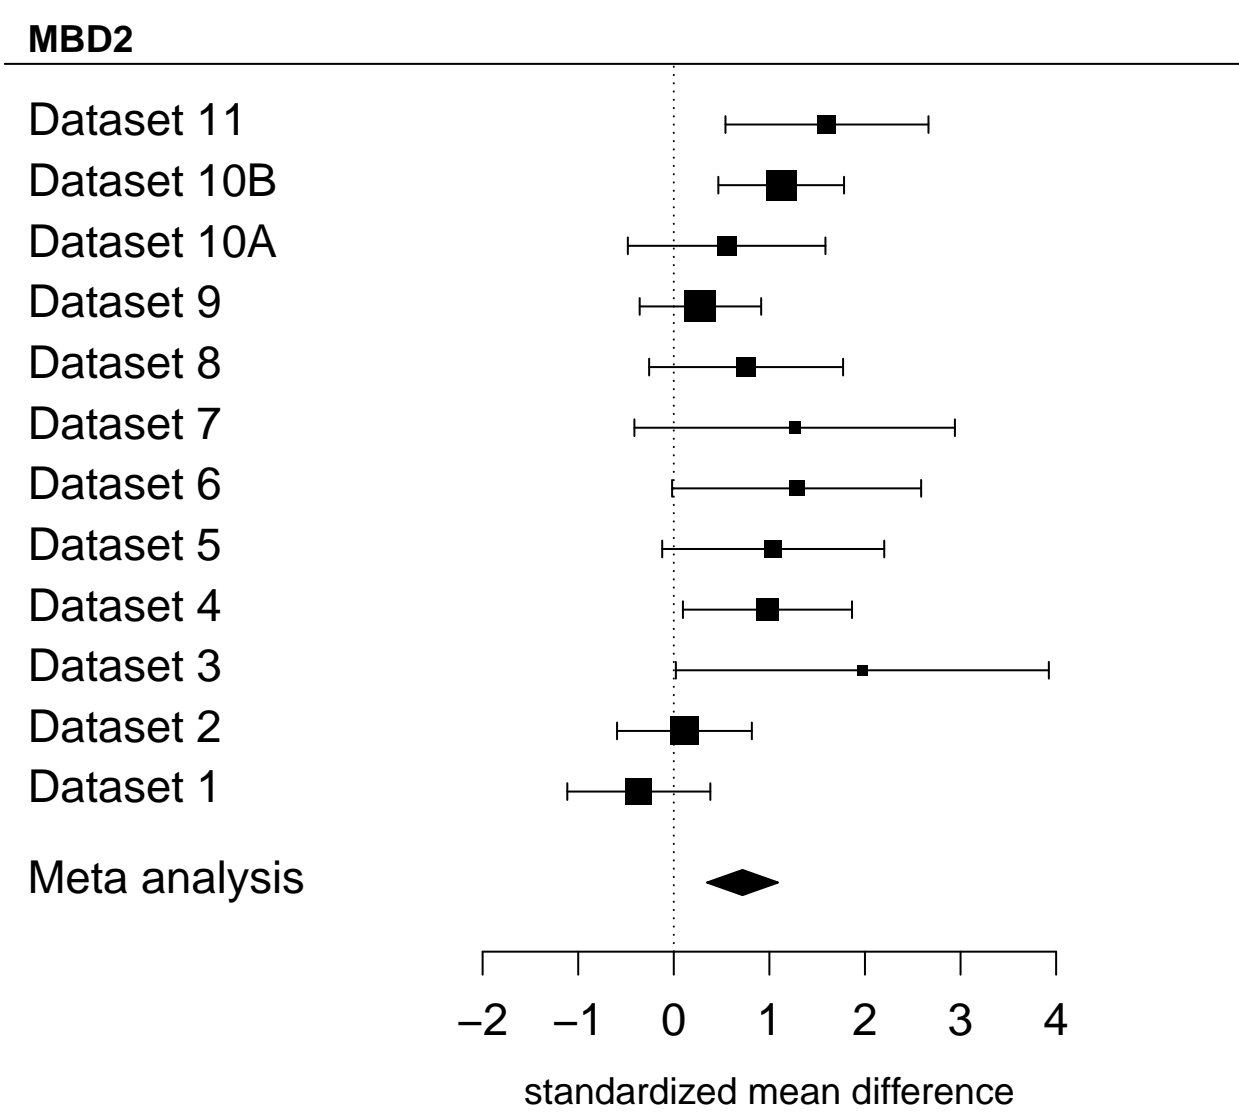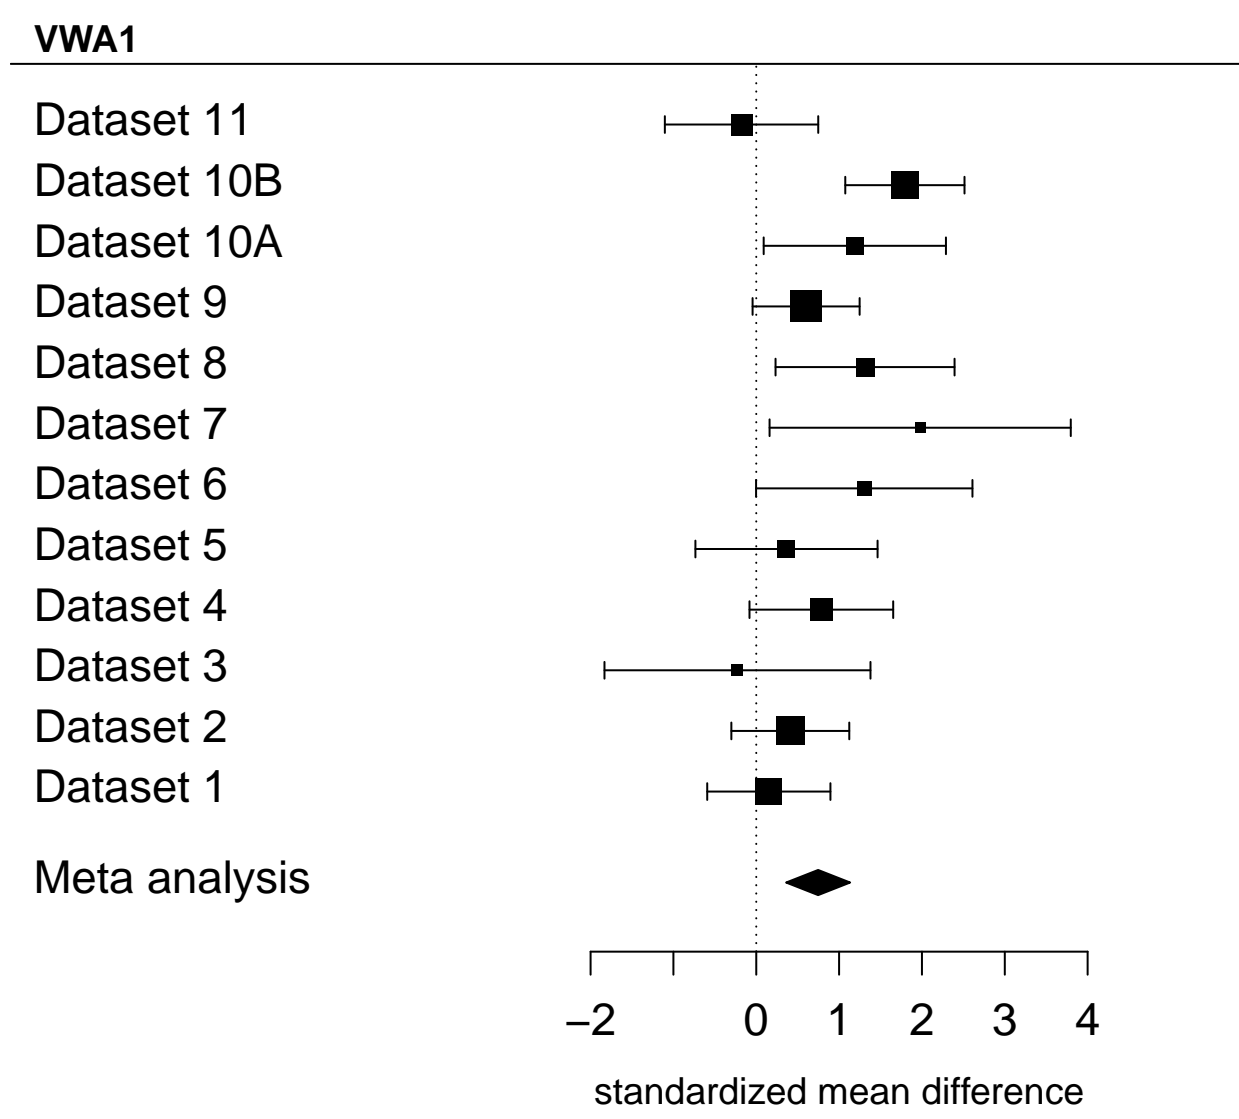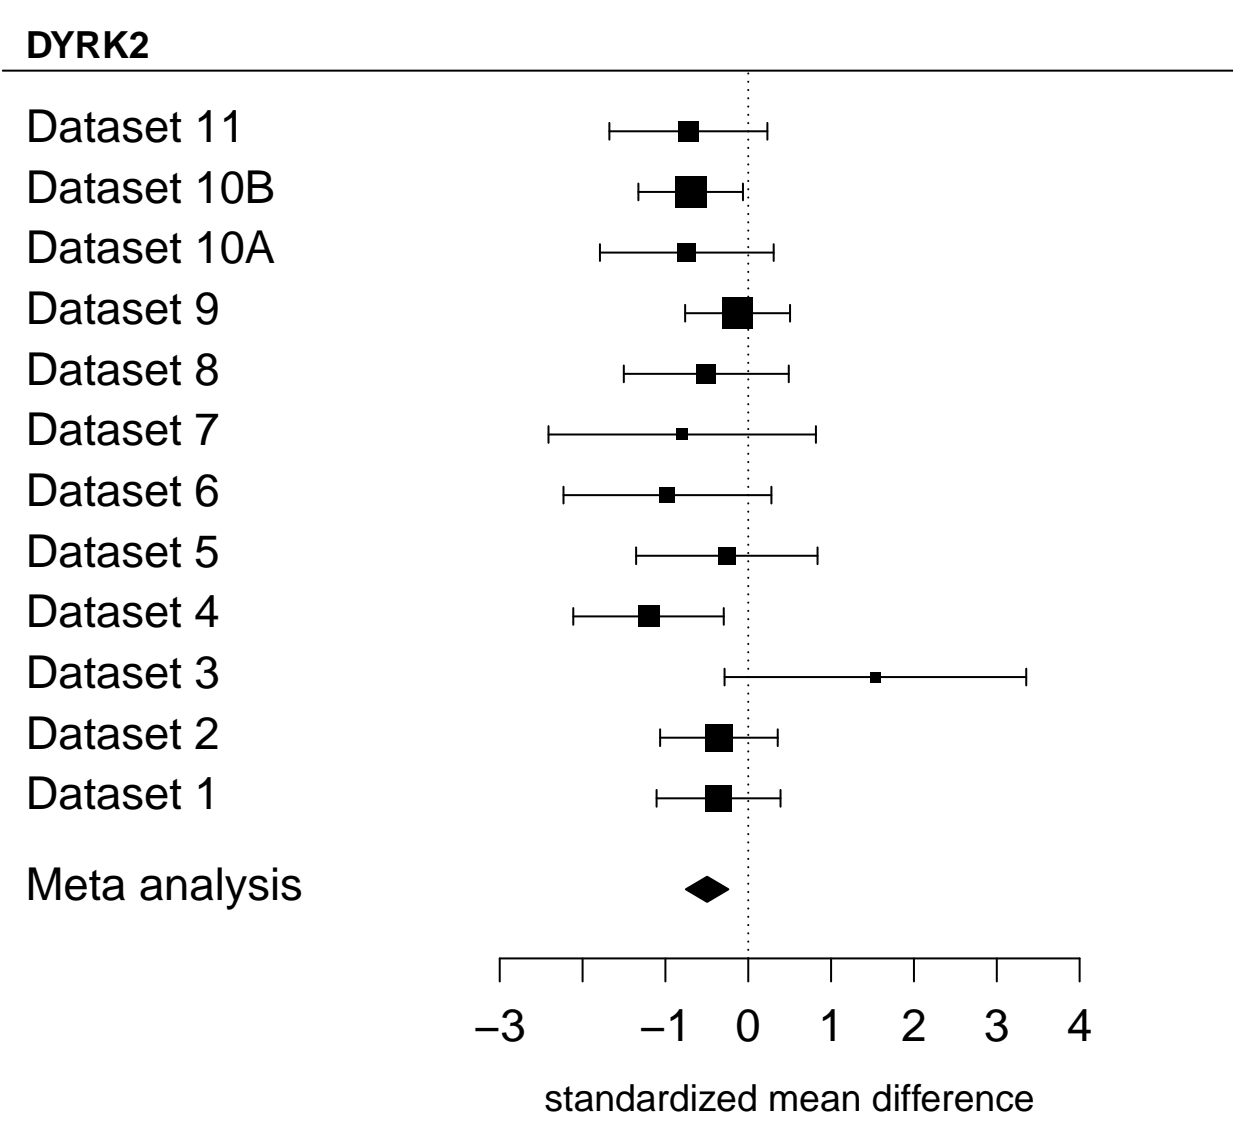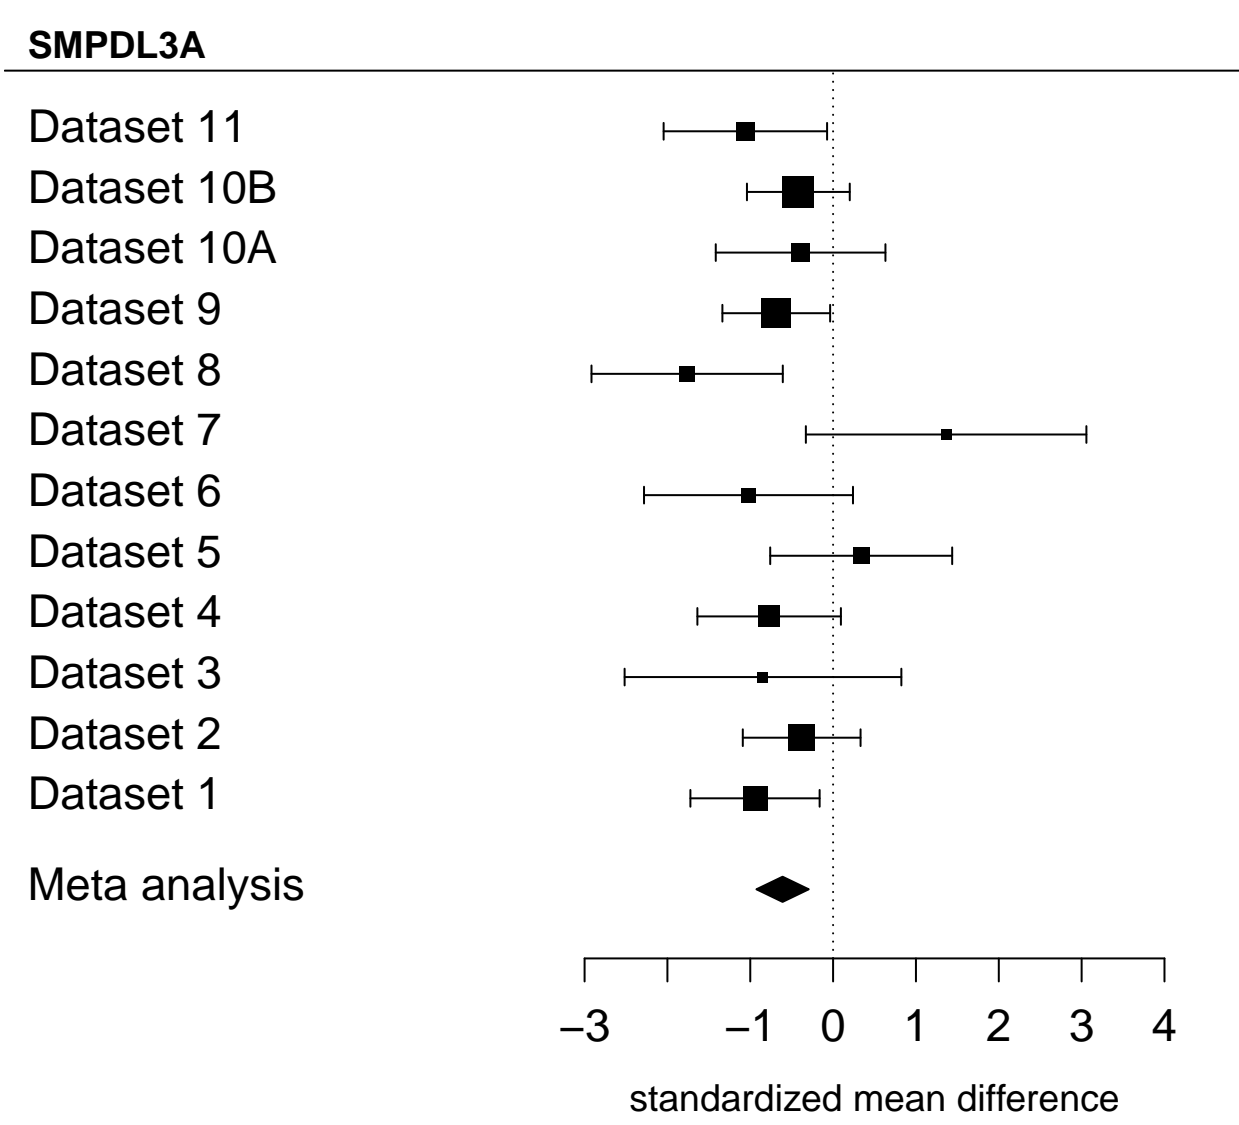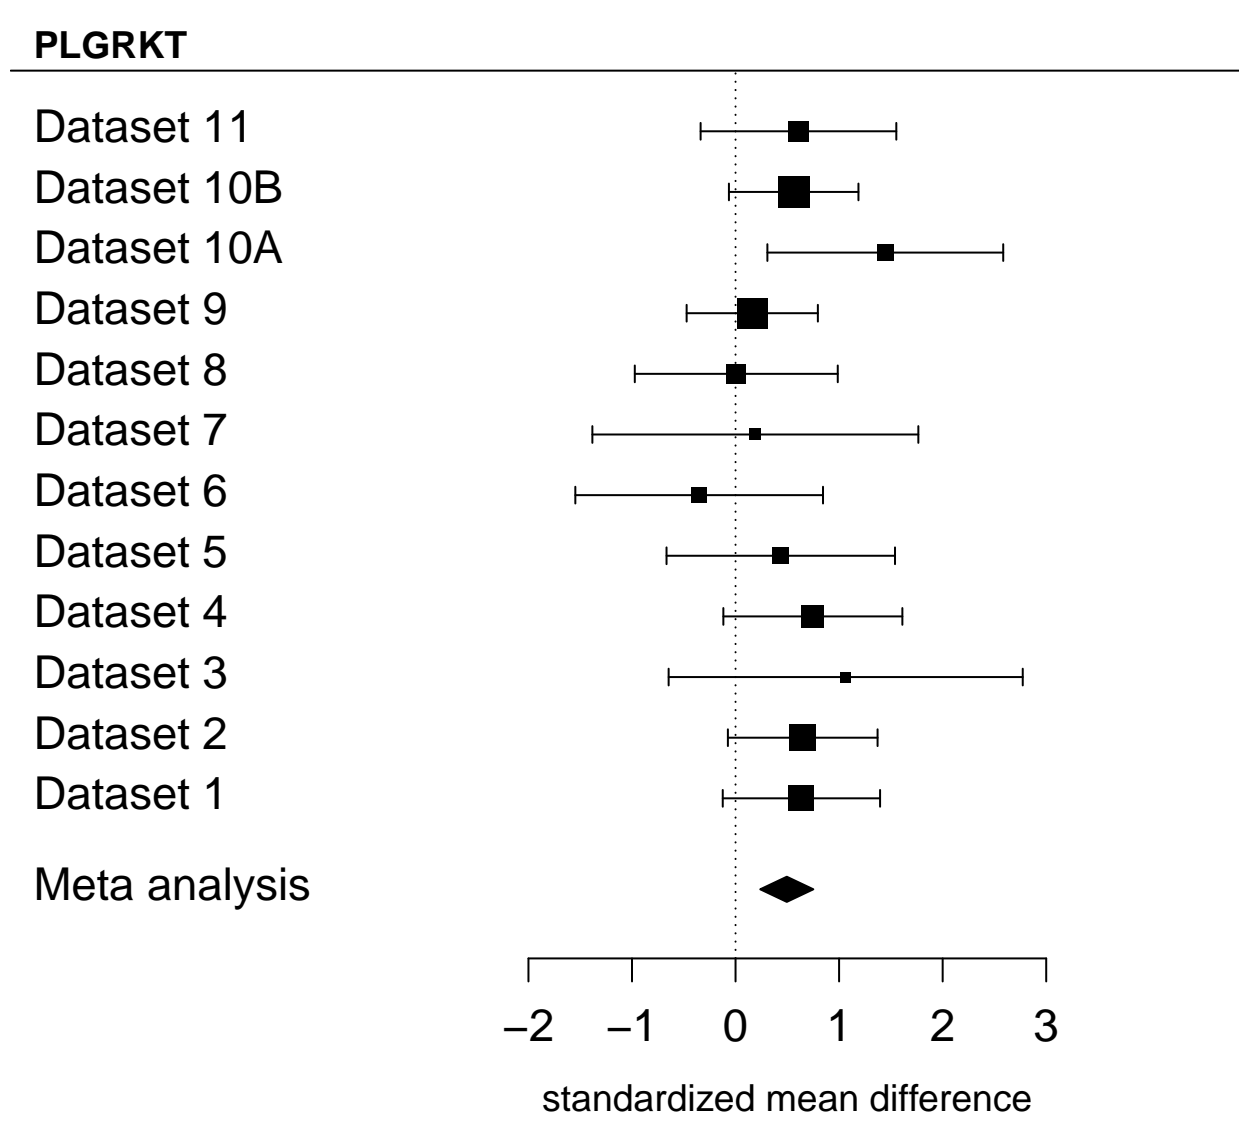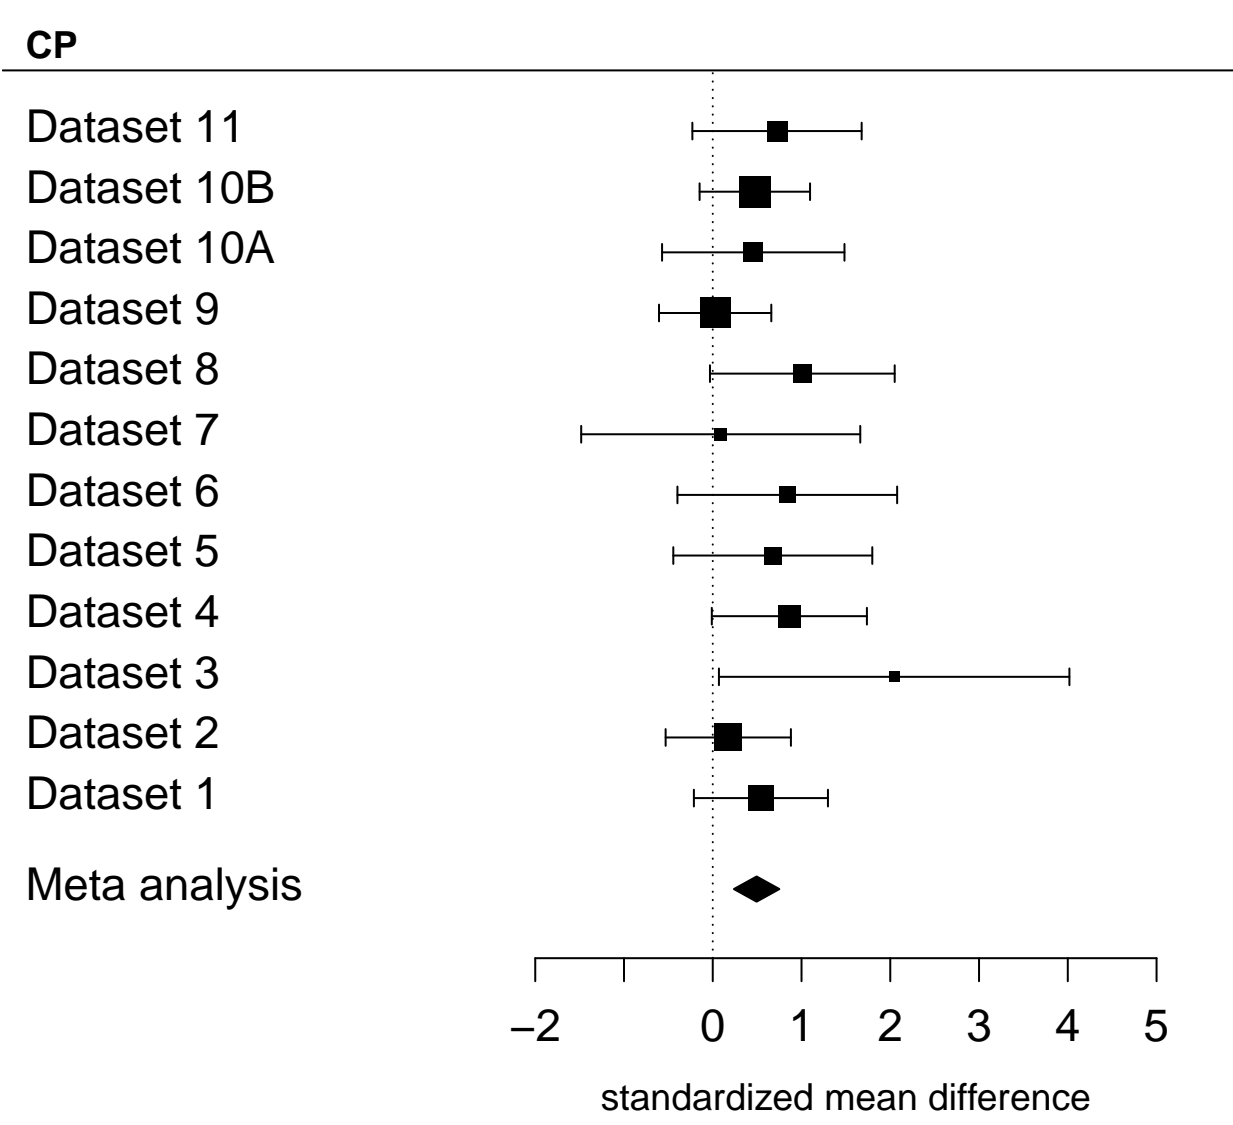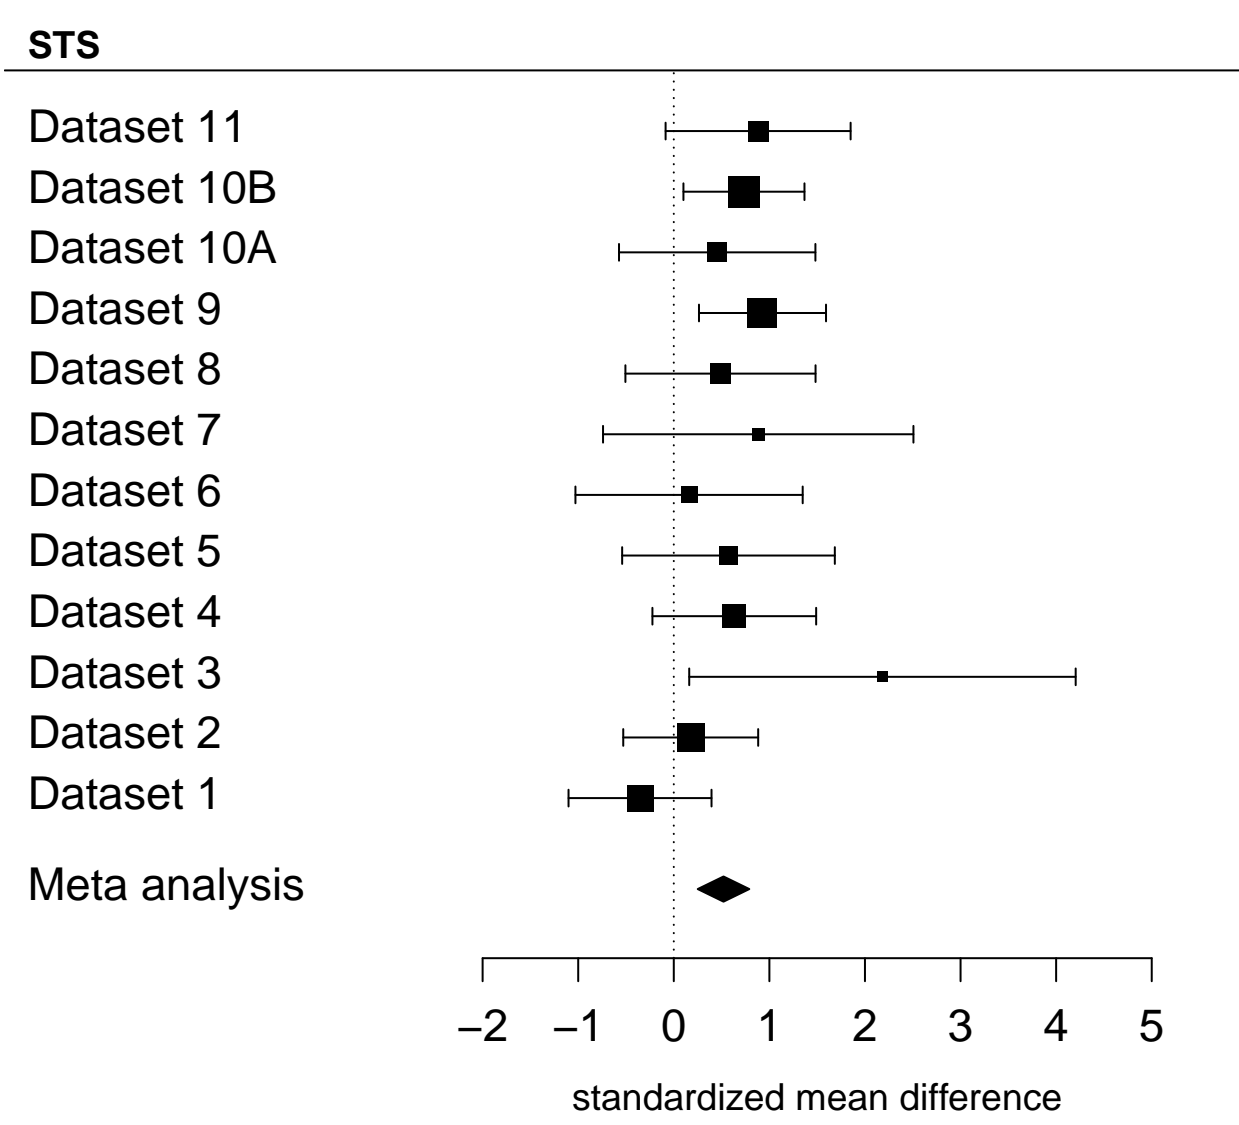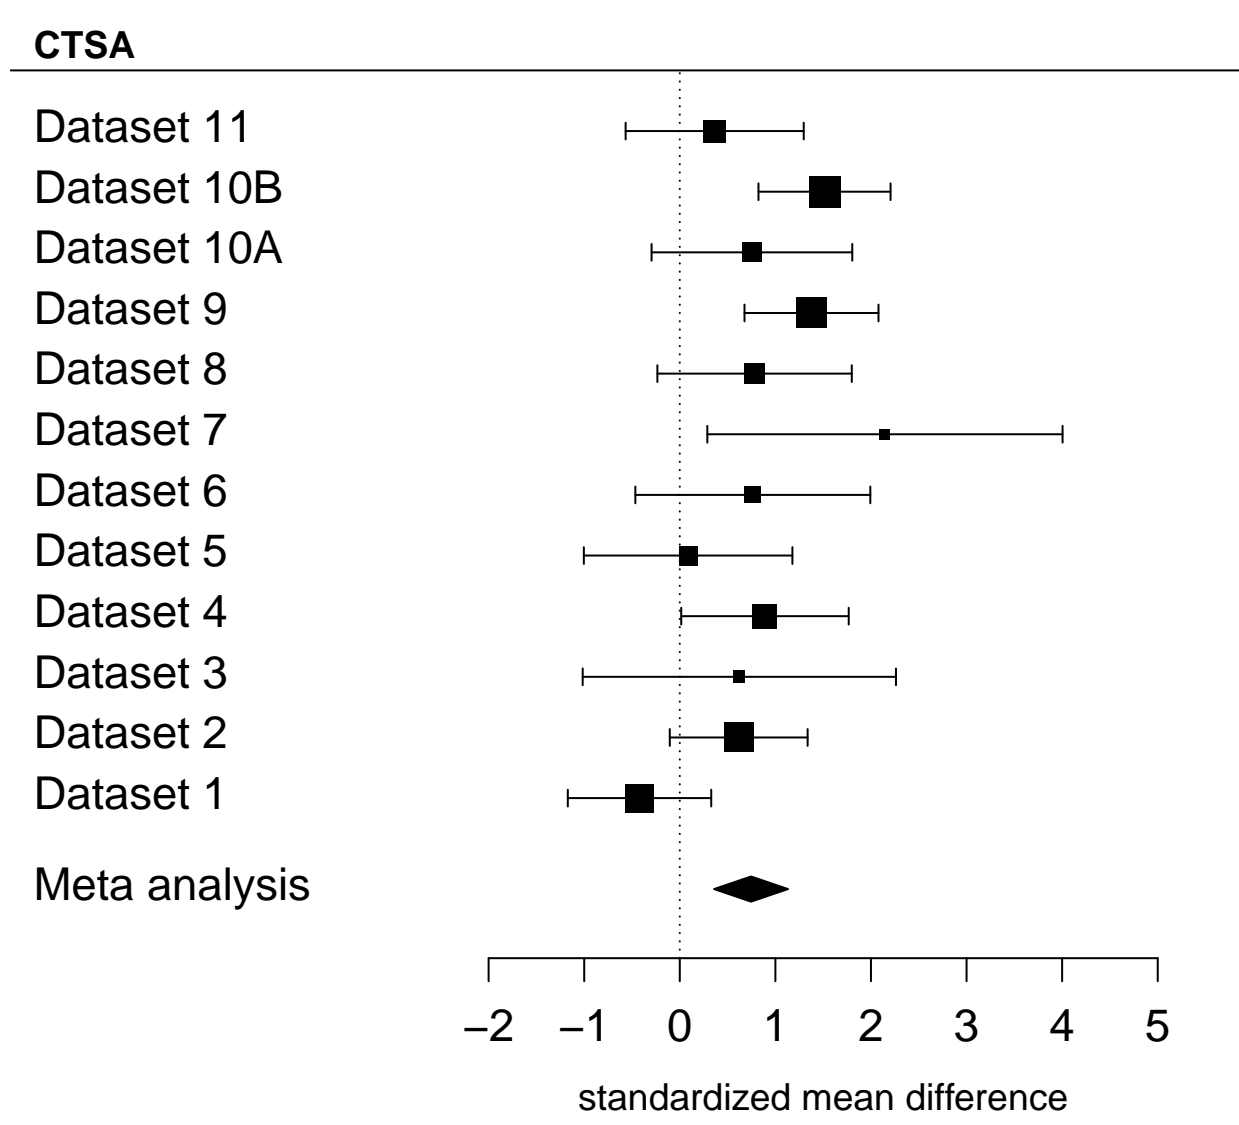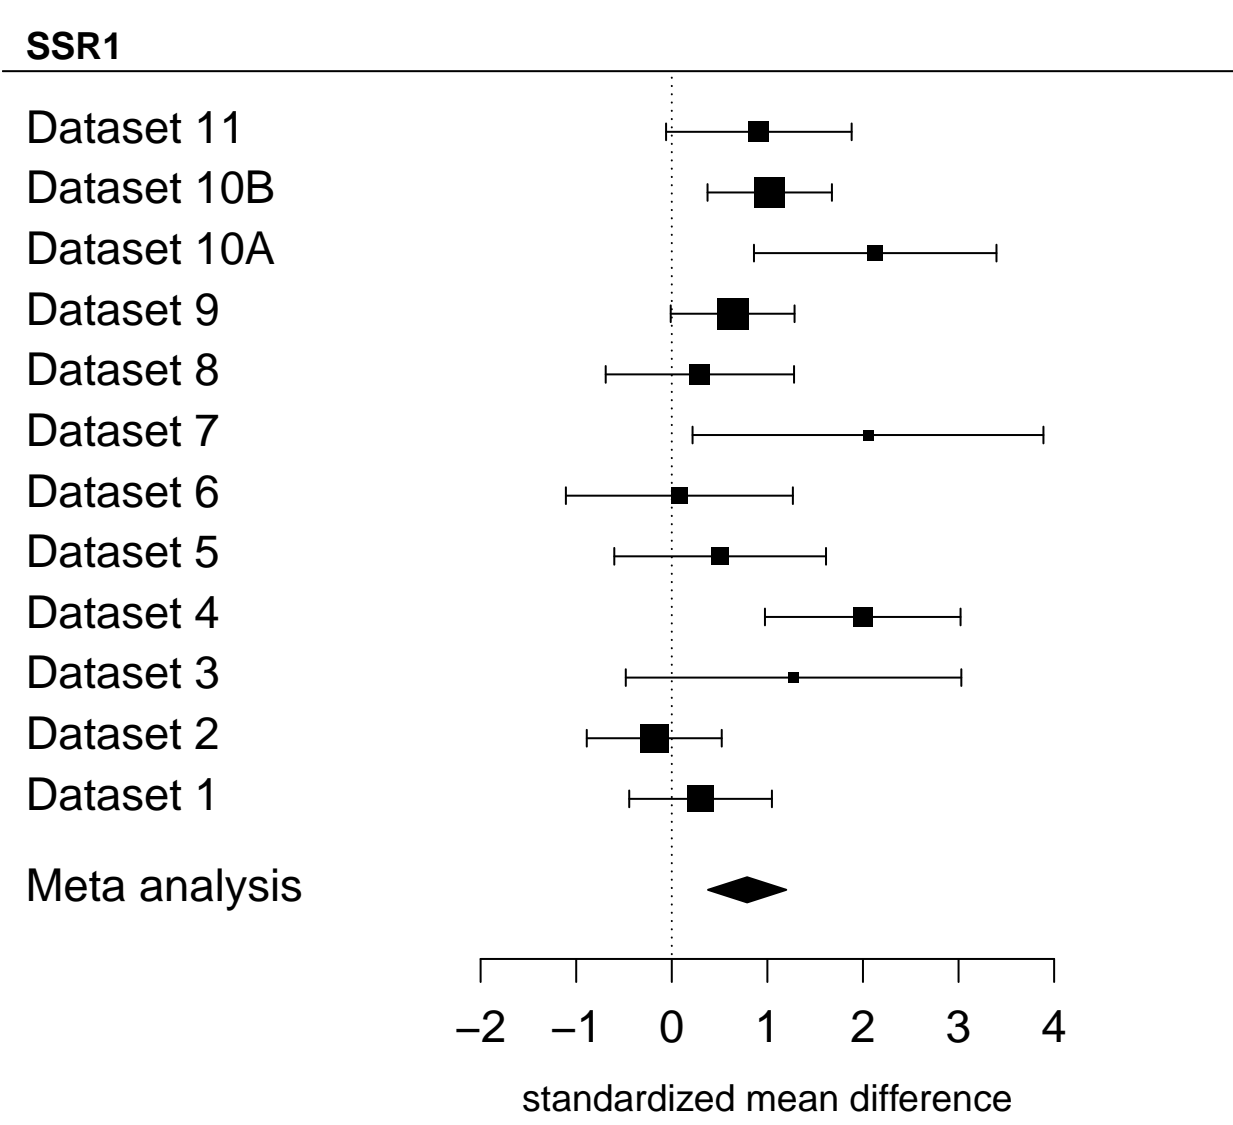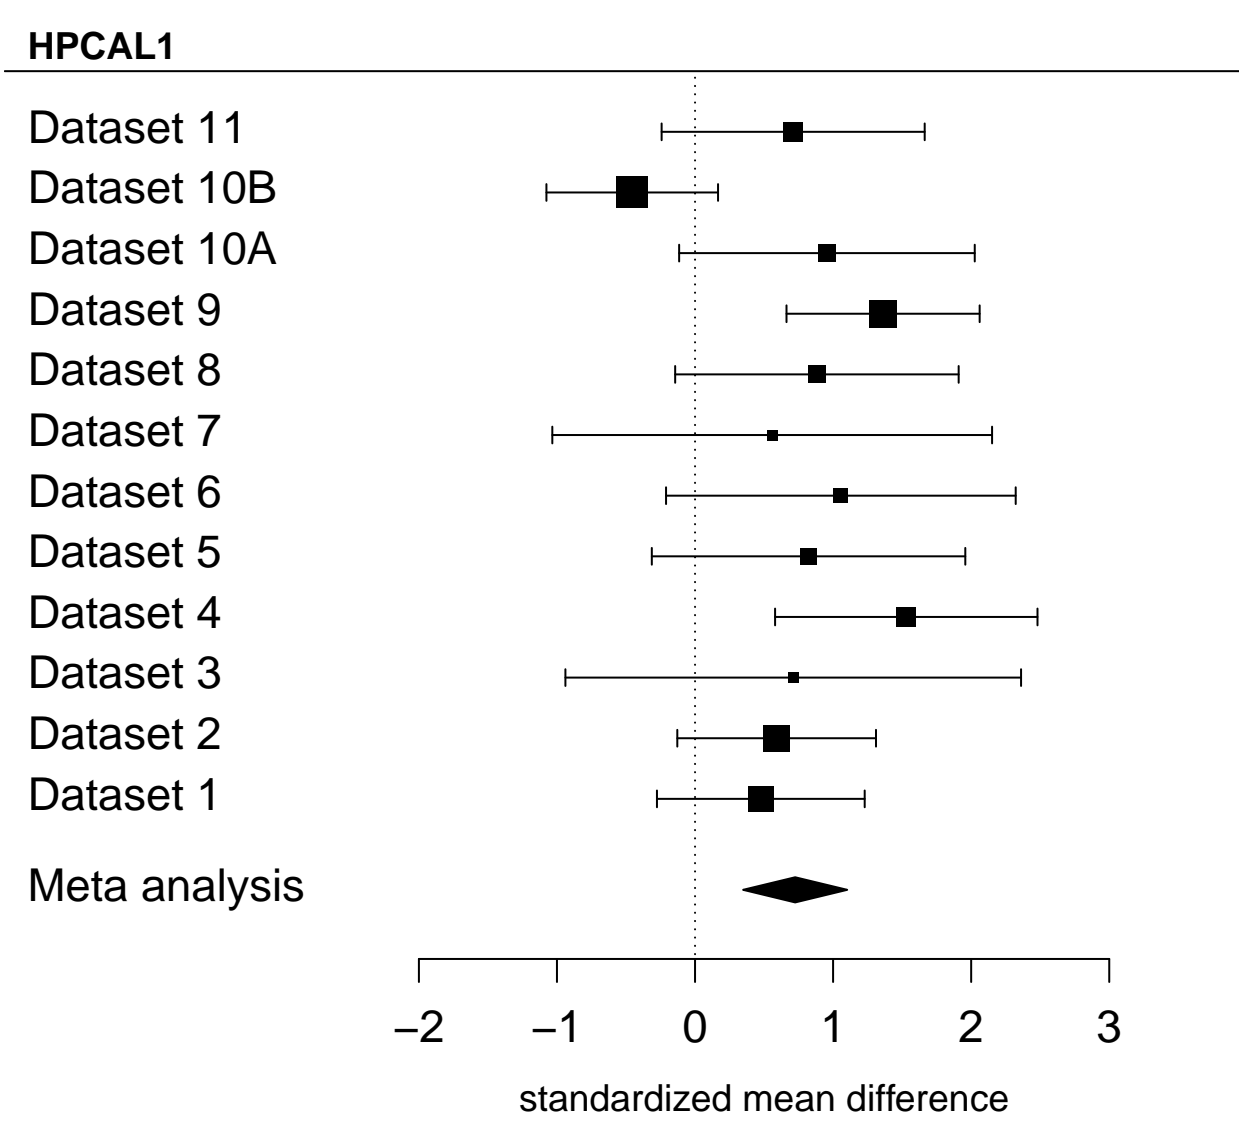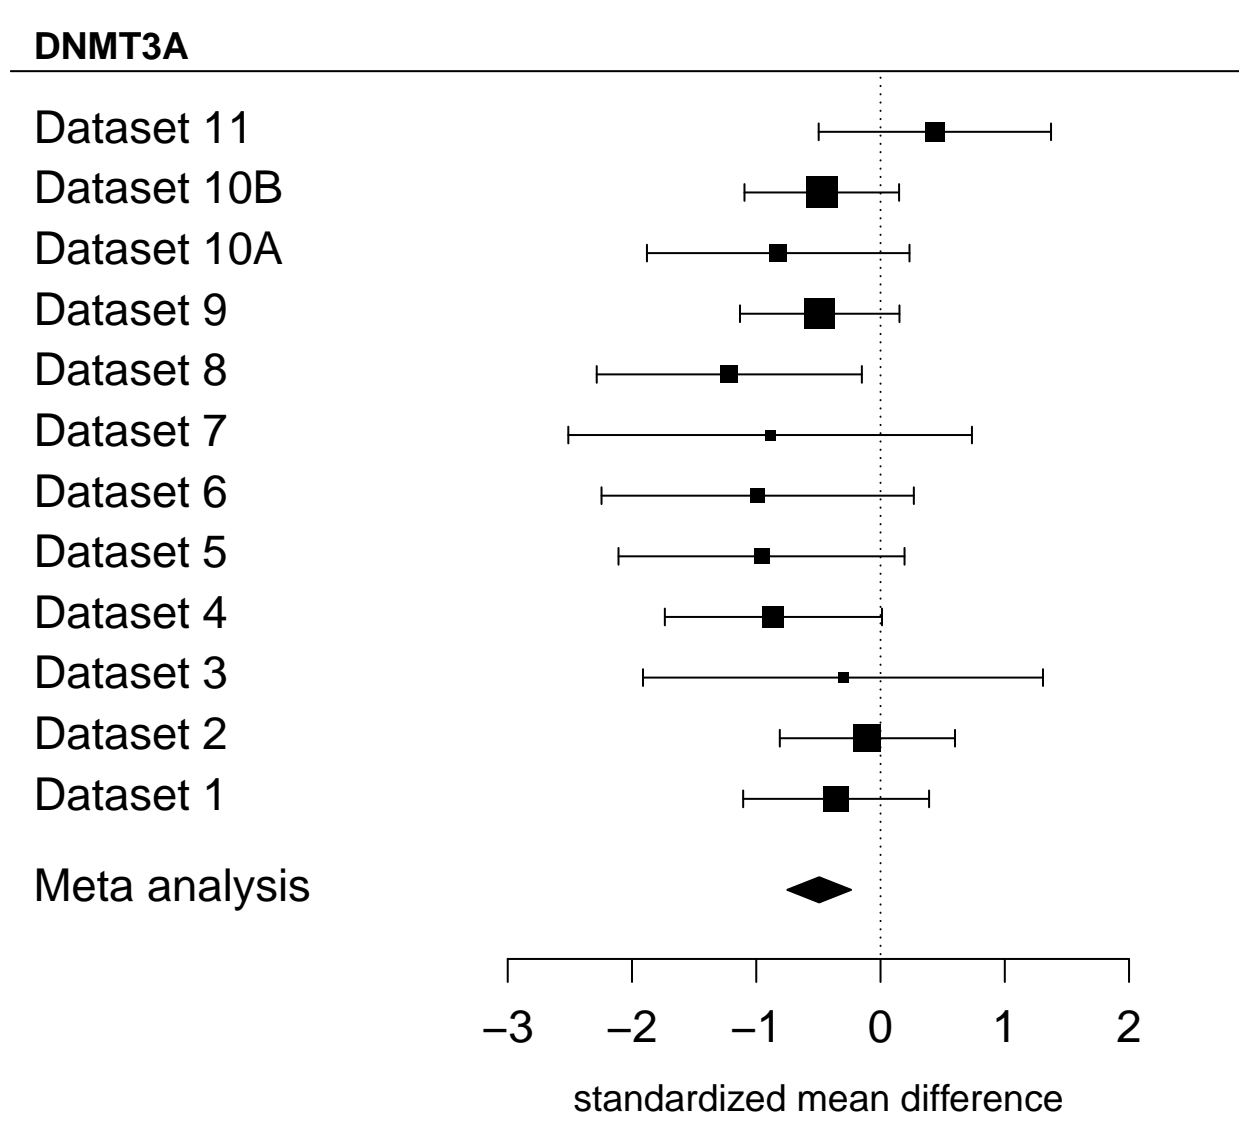

**SH3GL1**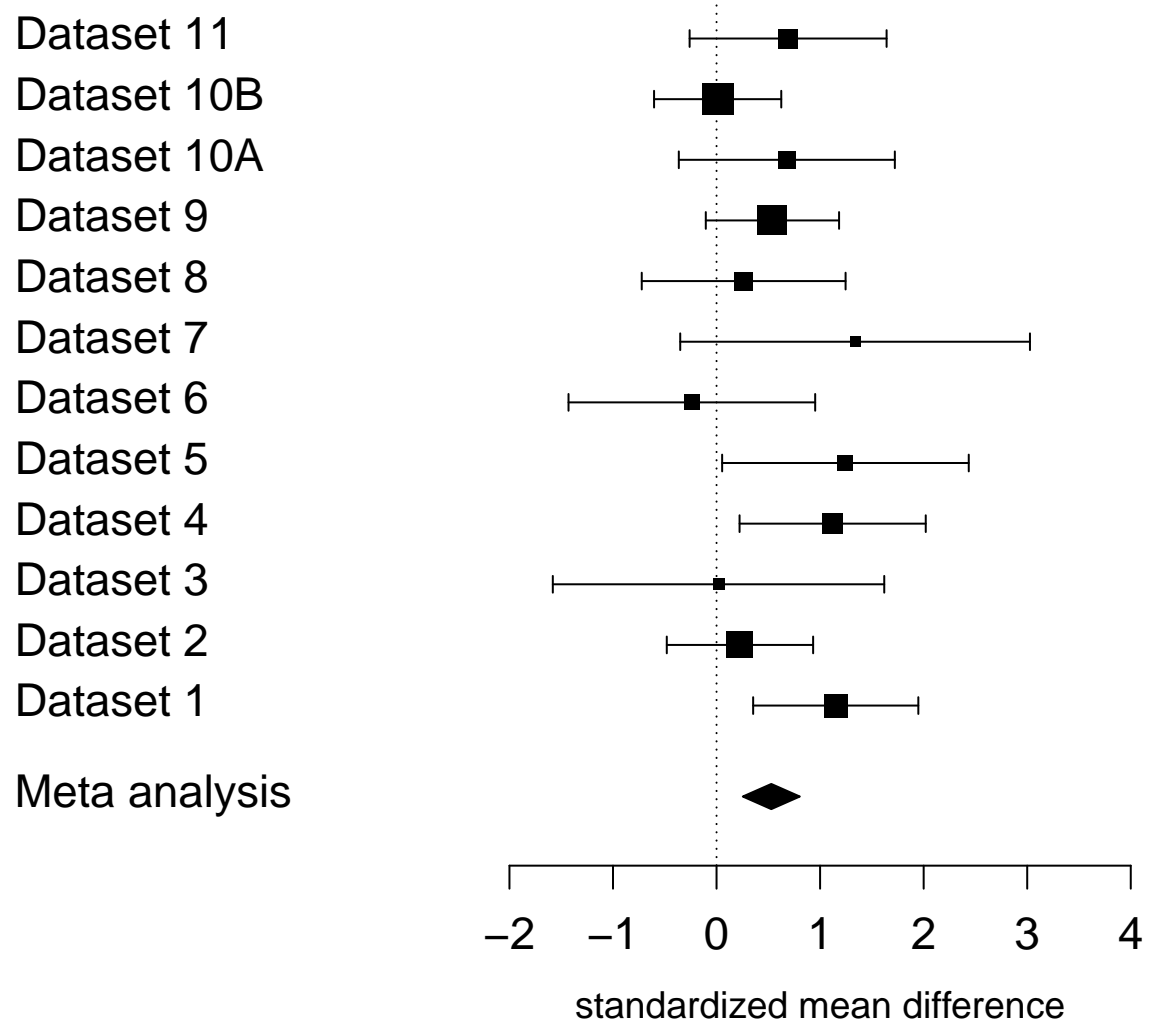**MYOF**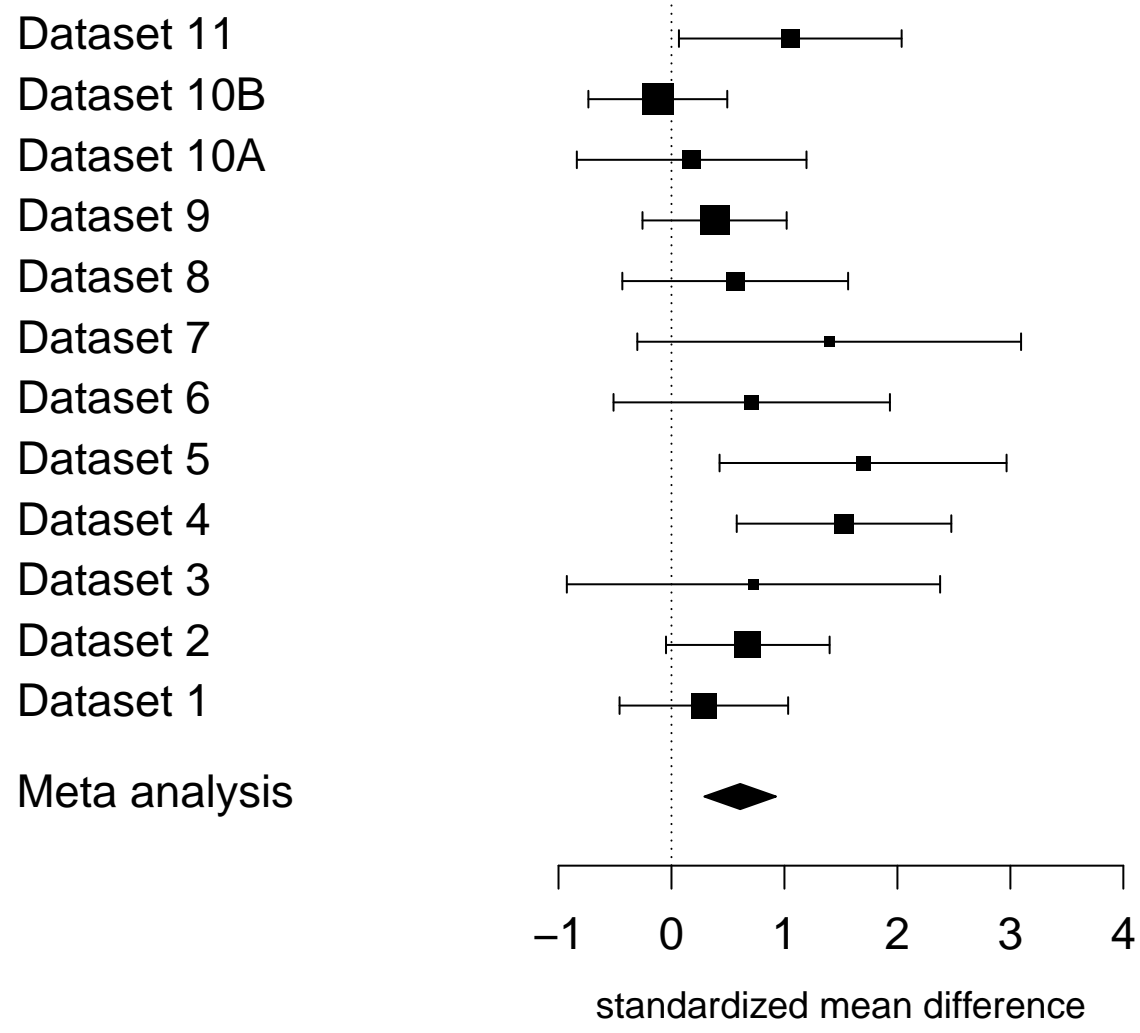**ITGA5**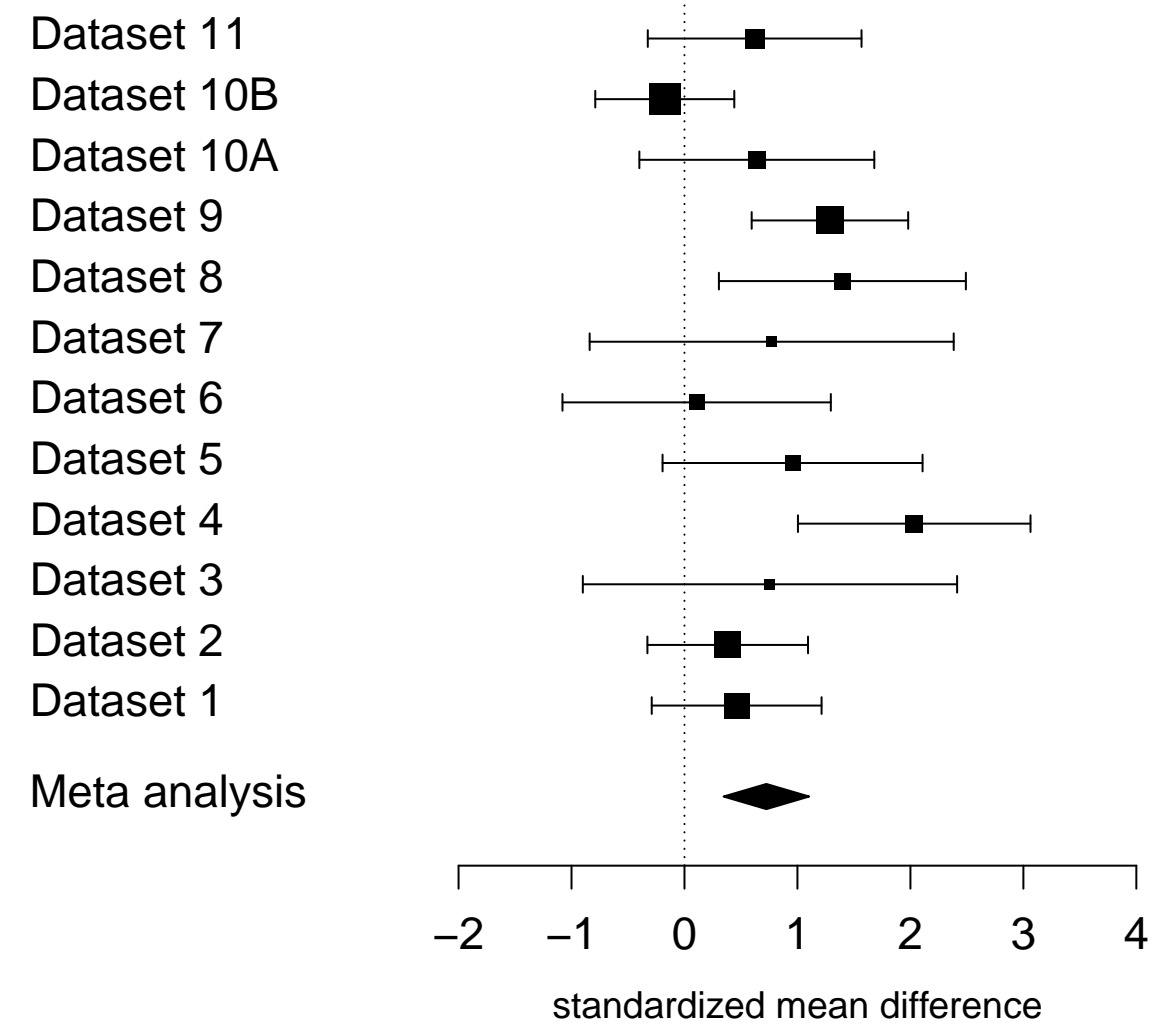**PRKCB**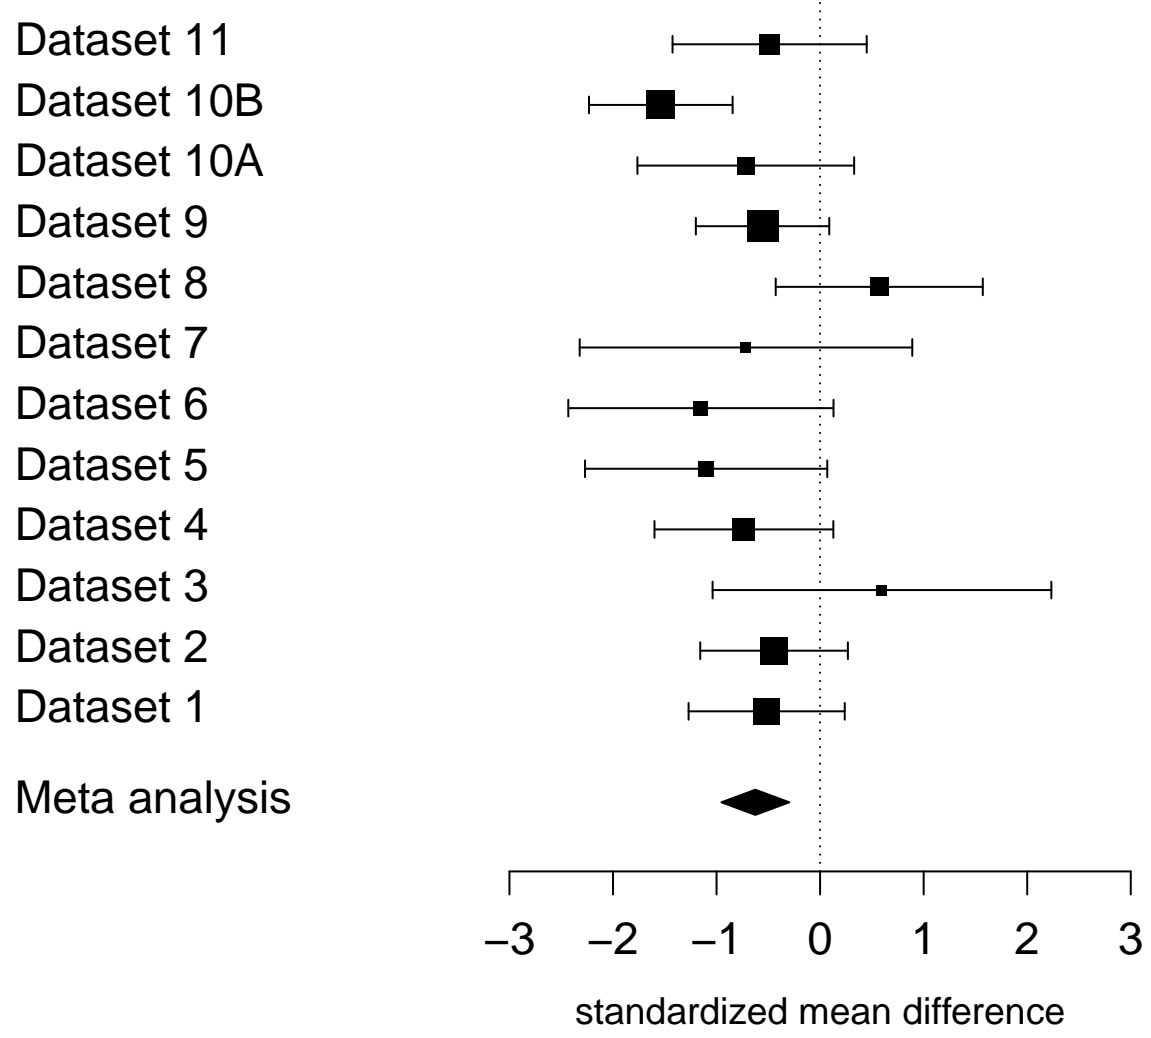**SDF2L1**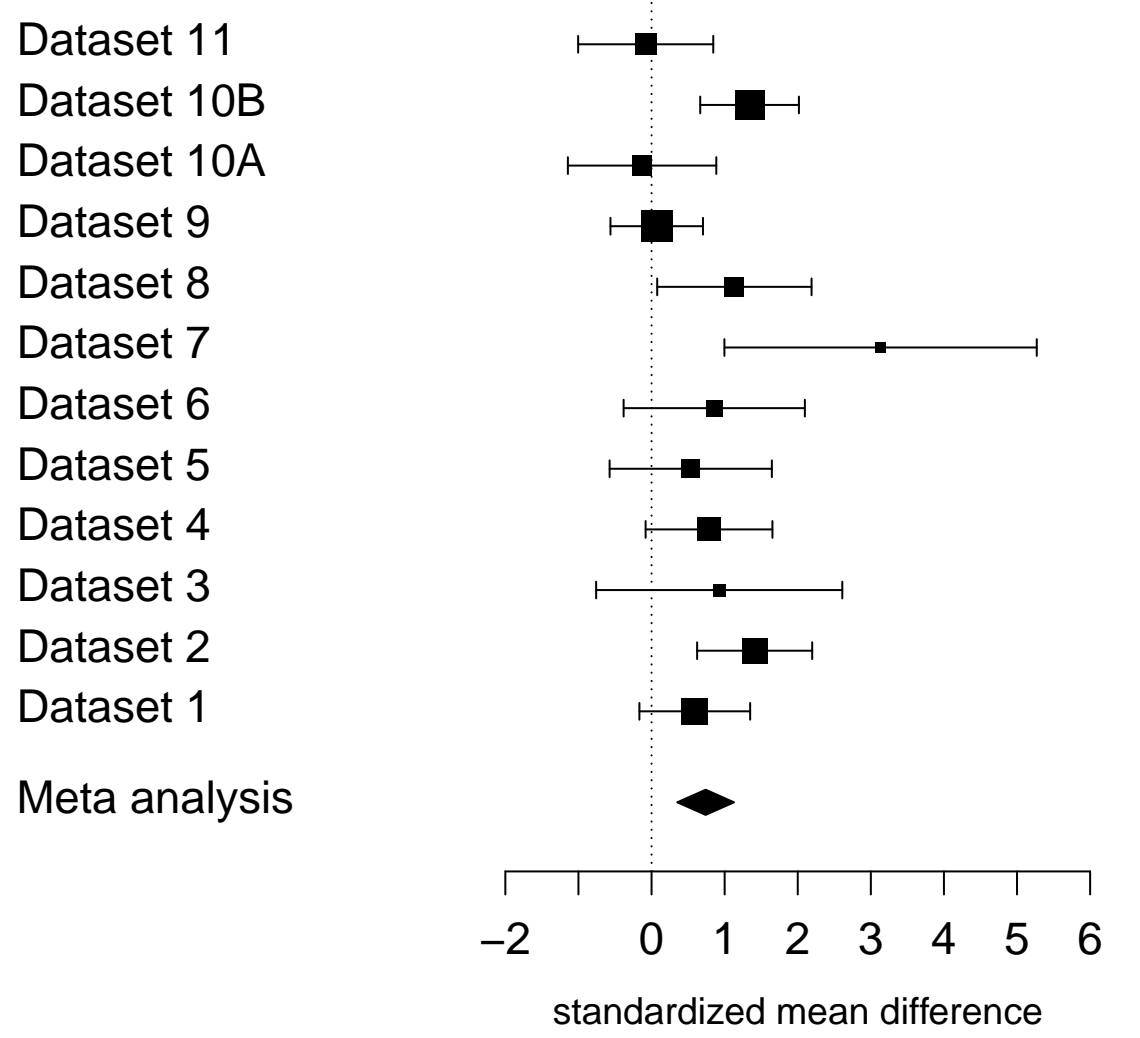**COL1A2**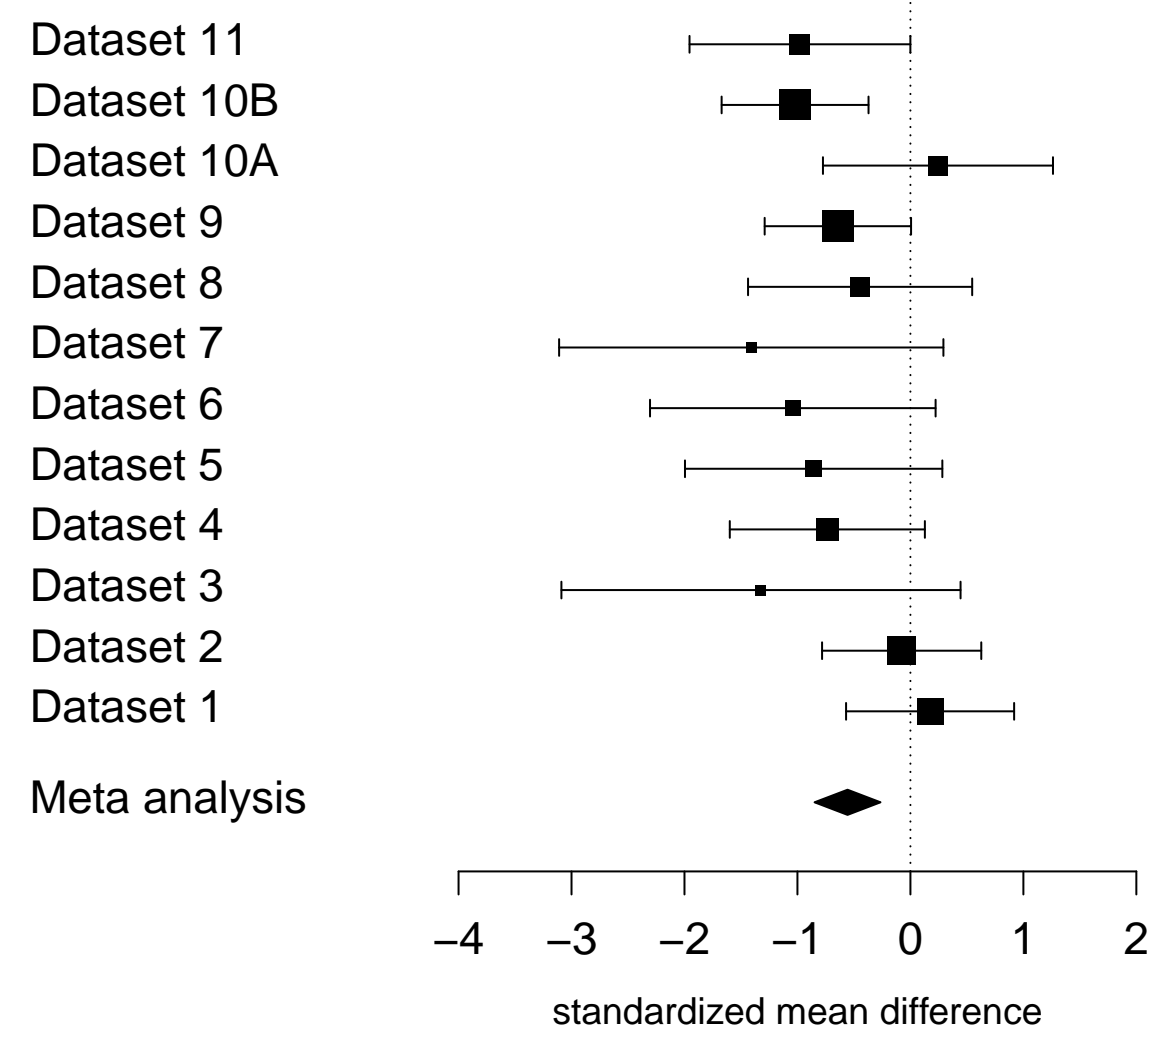**BAIAP2L2**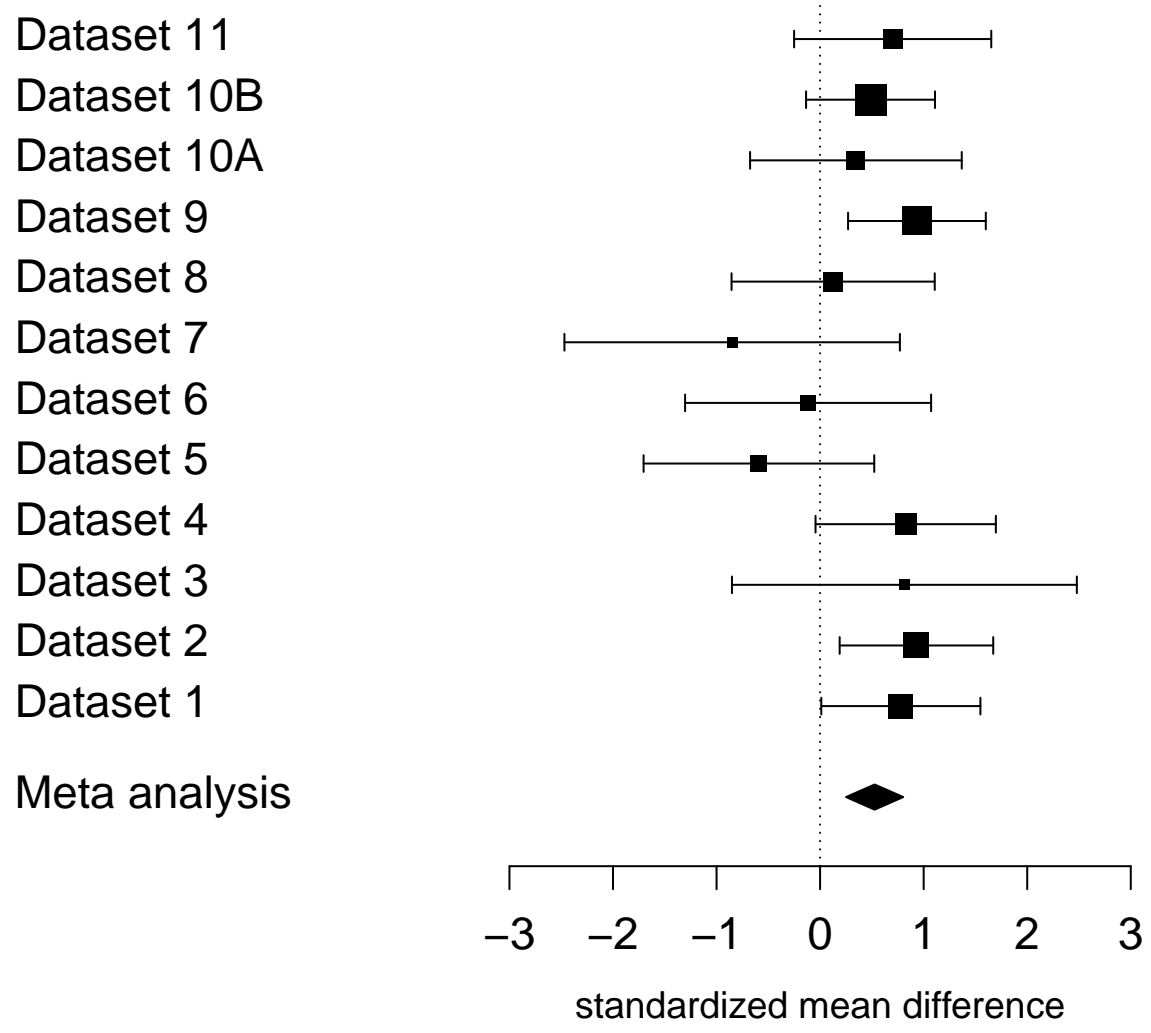**PIK3CB**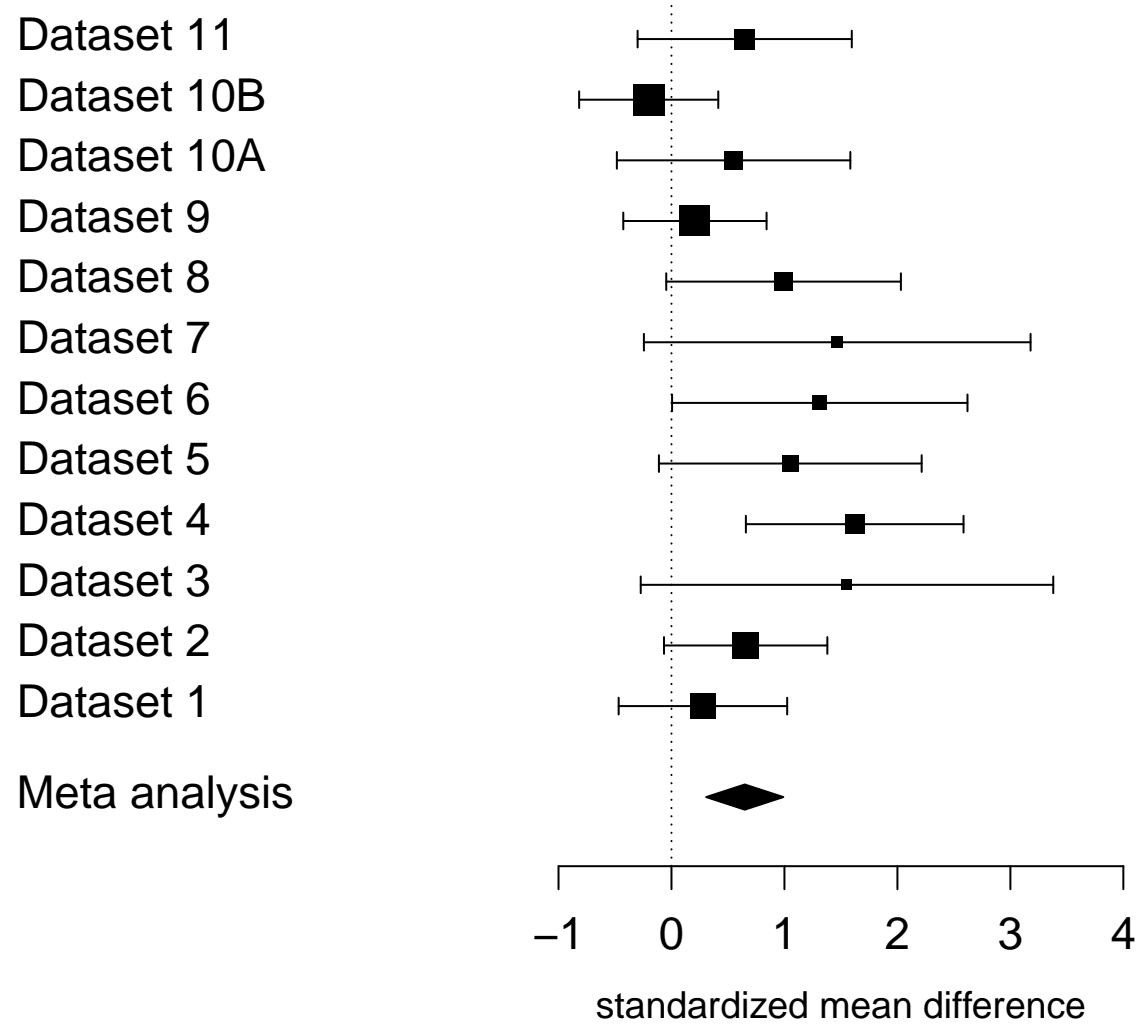**INSIG1**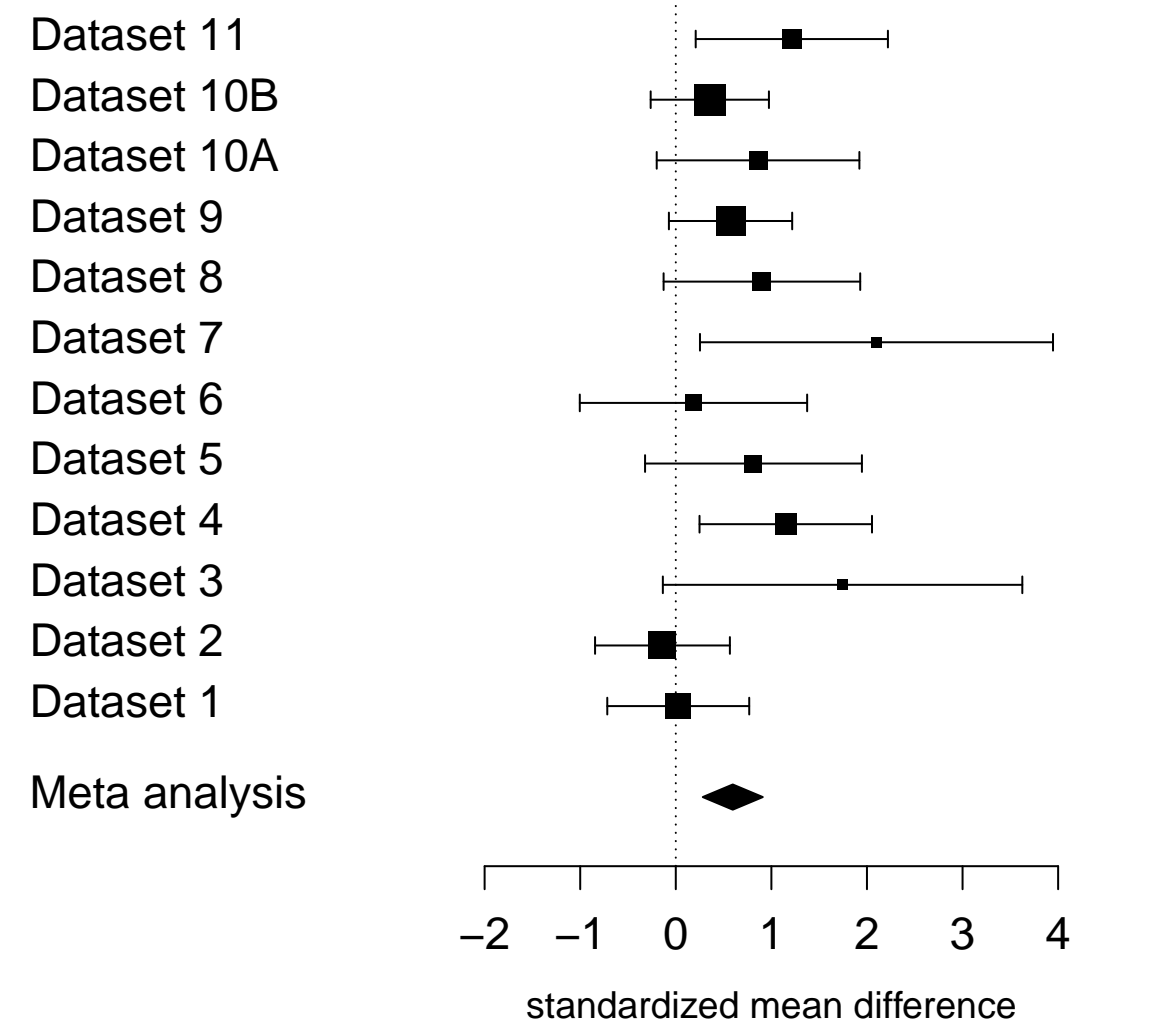**RUVBL2**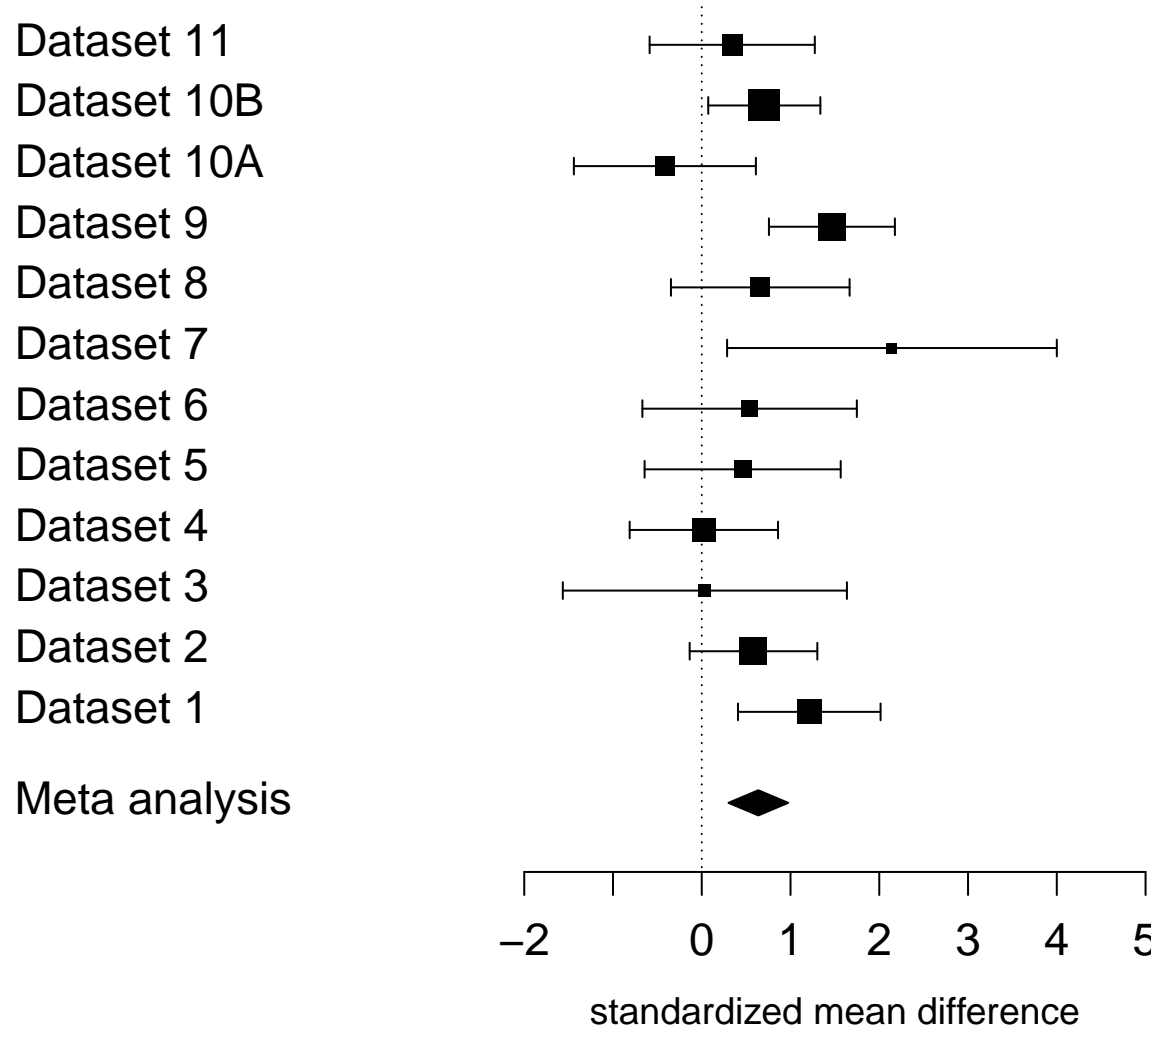**TMEM131**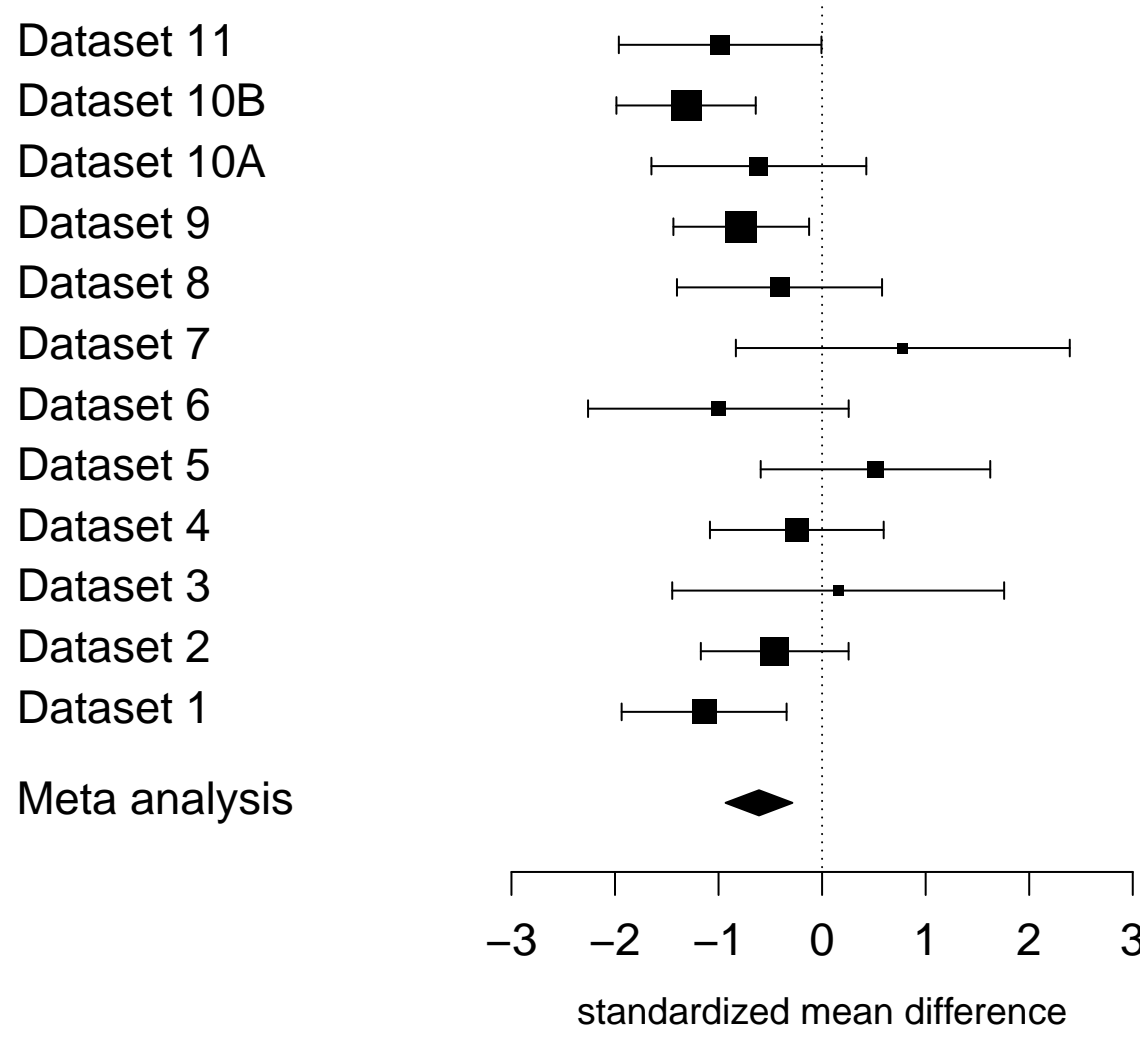**FN1**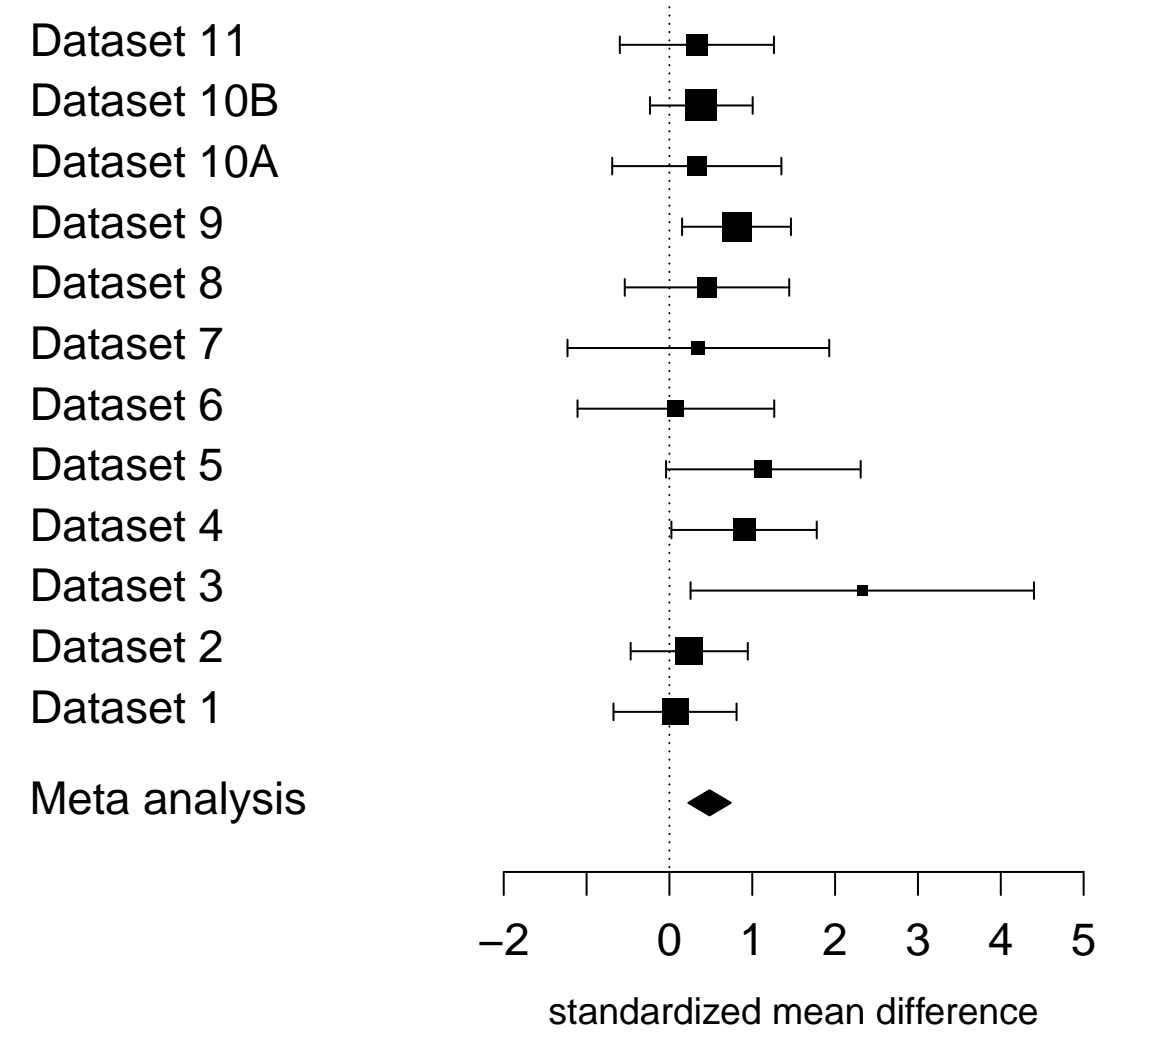

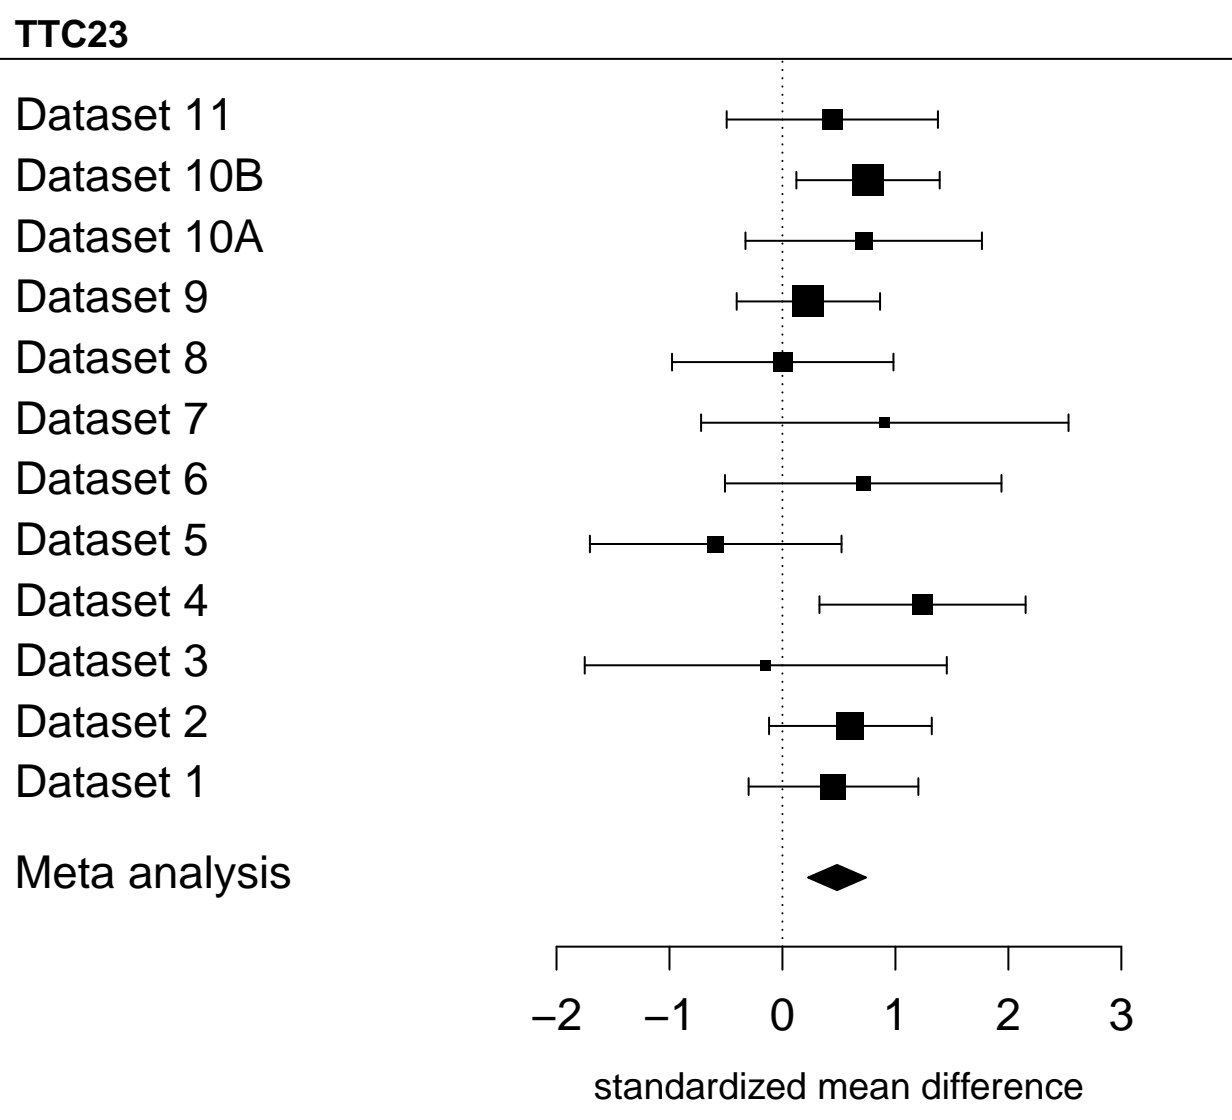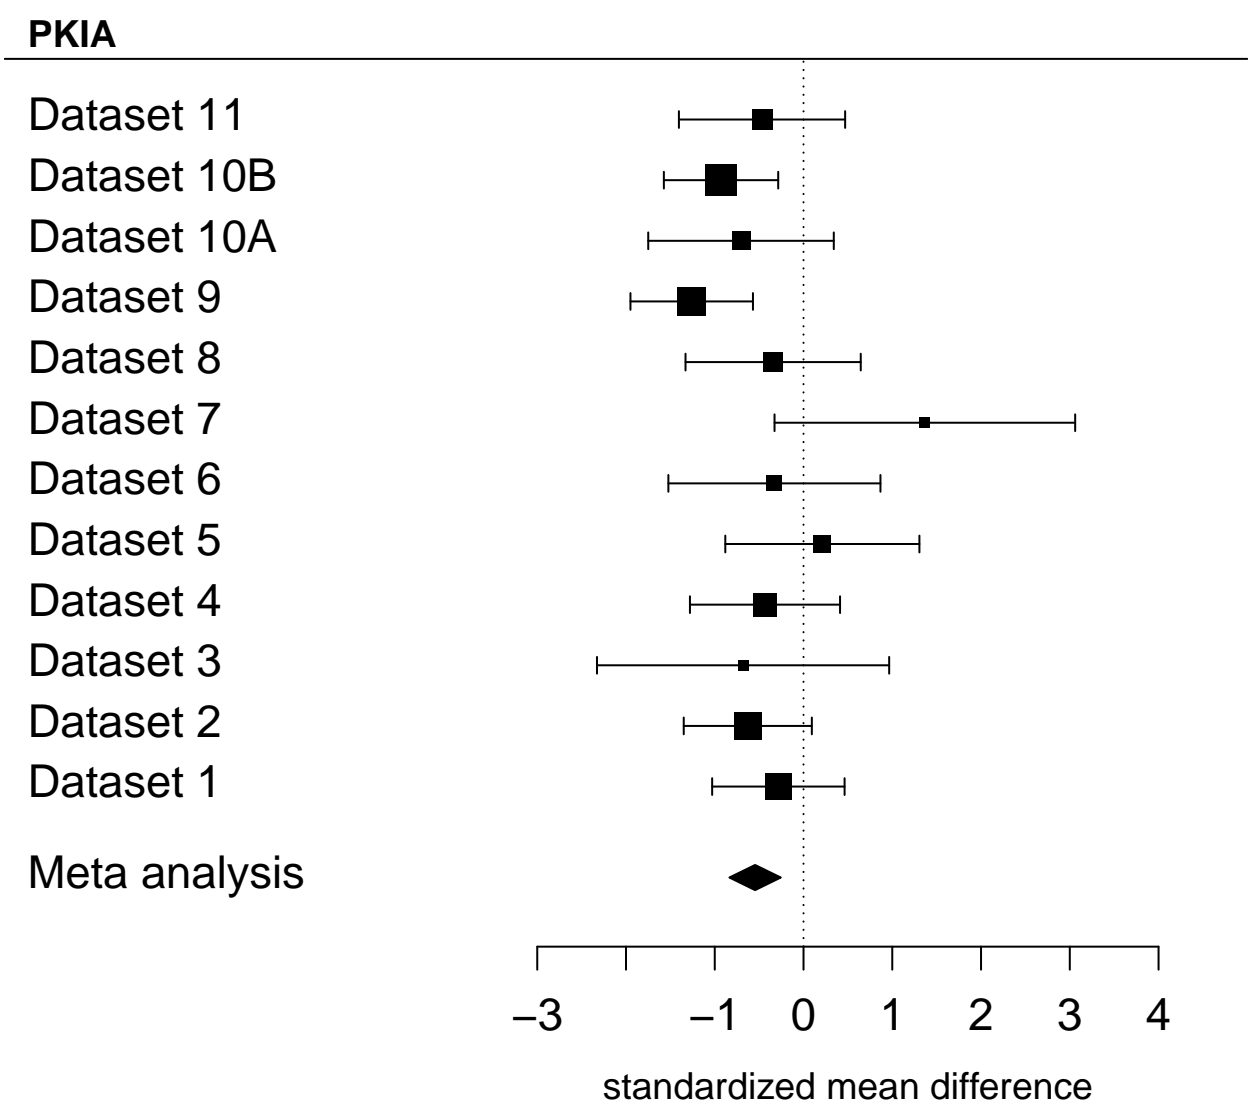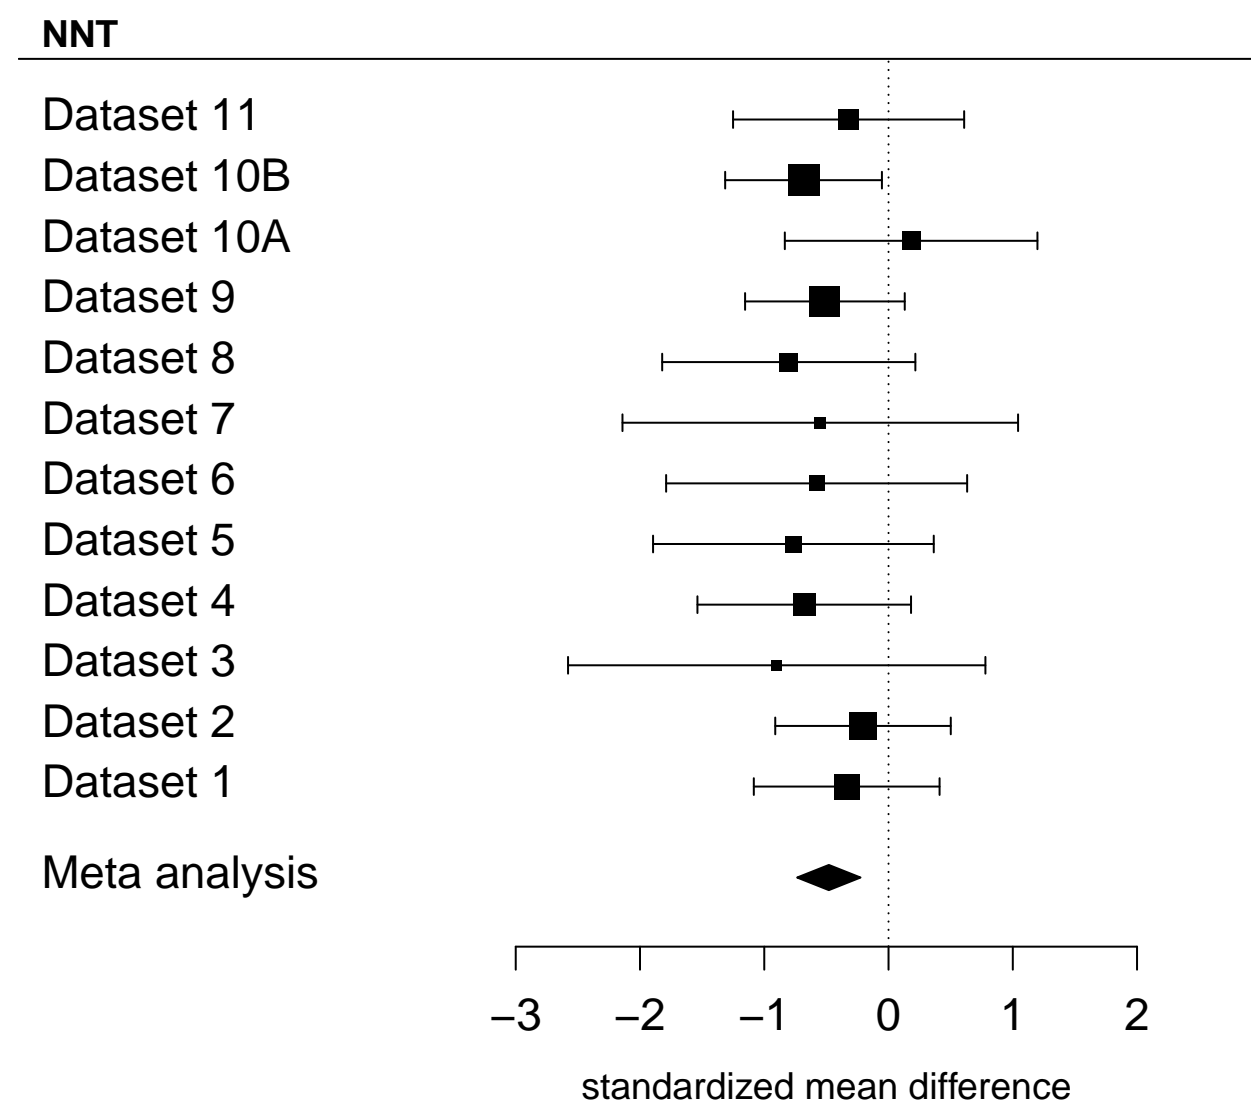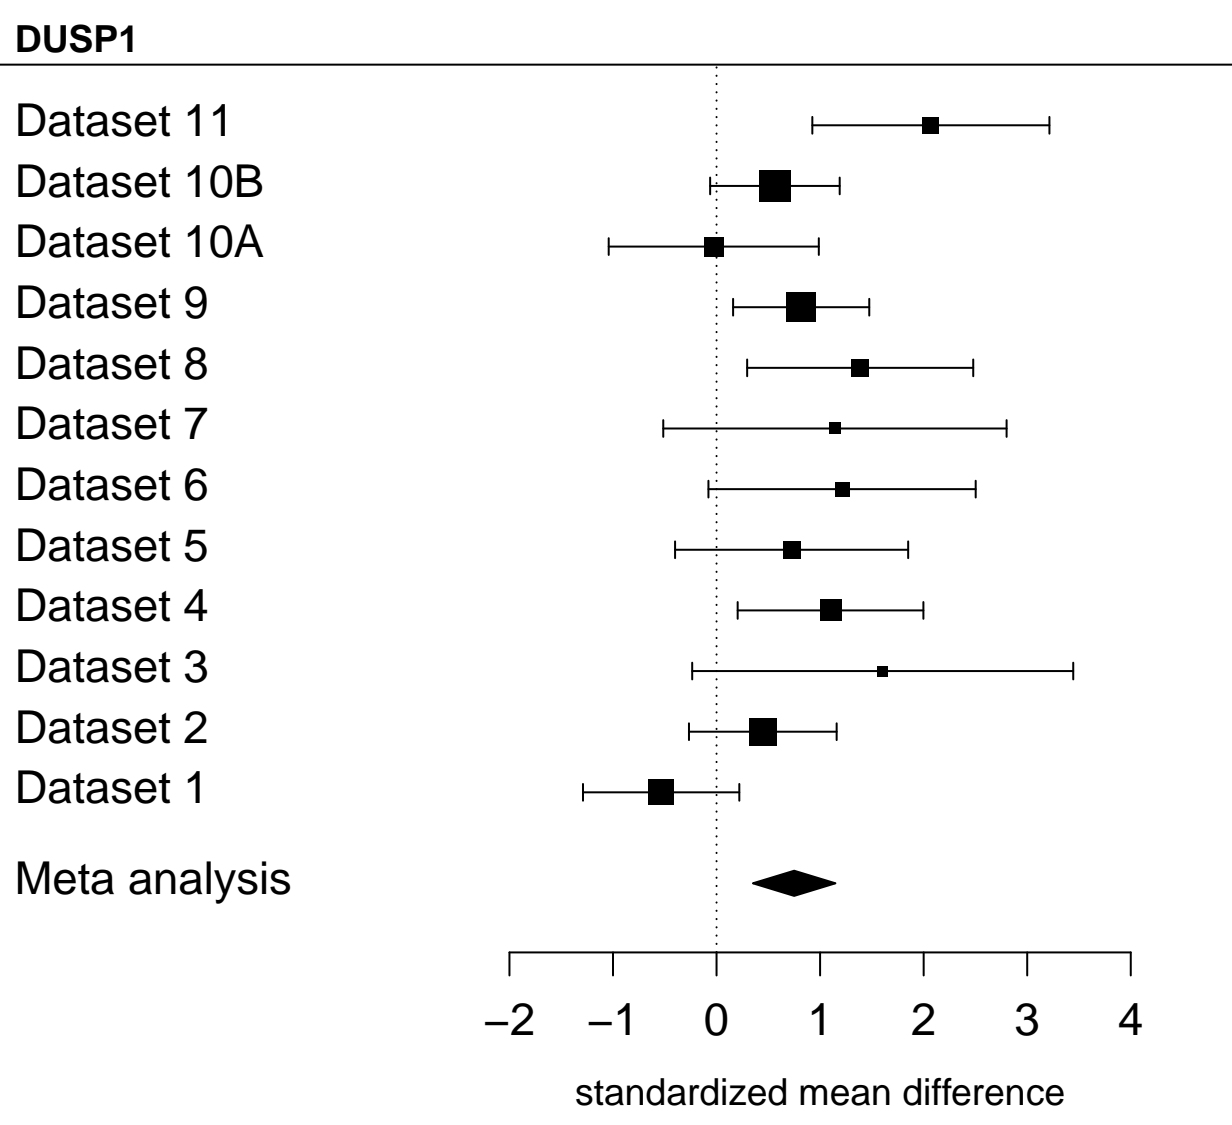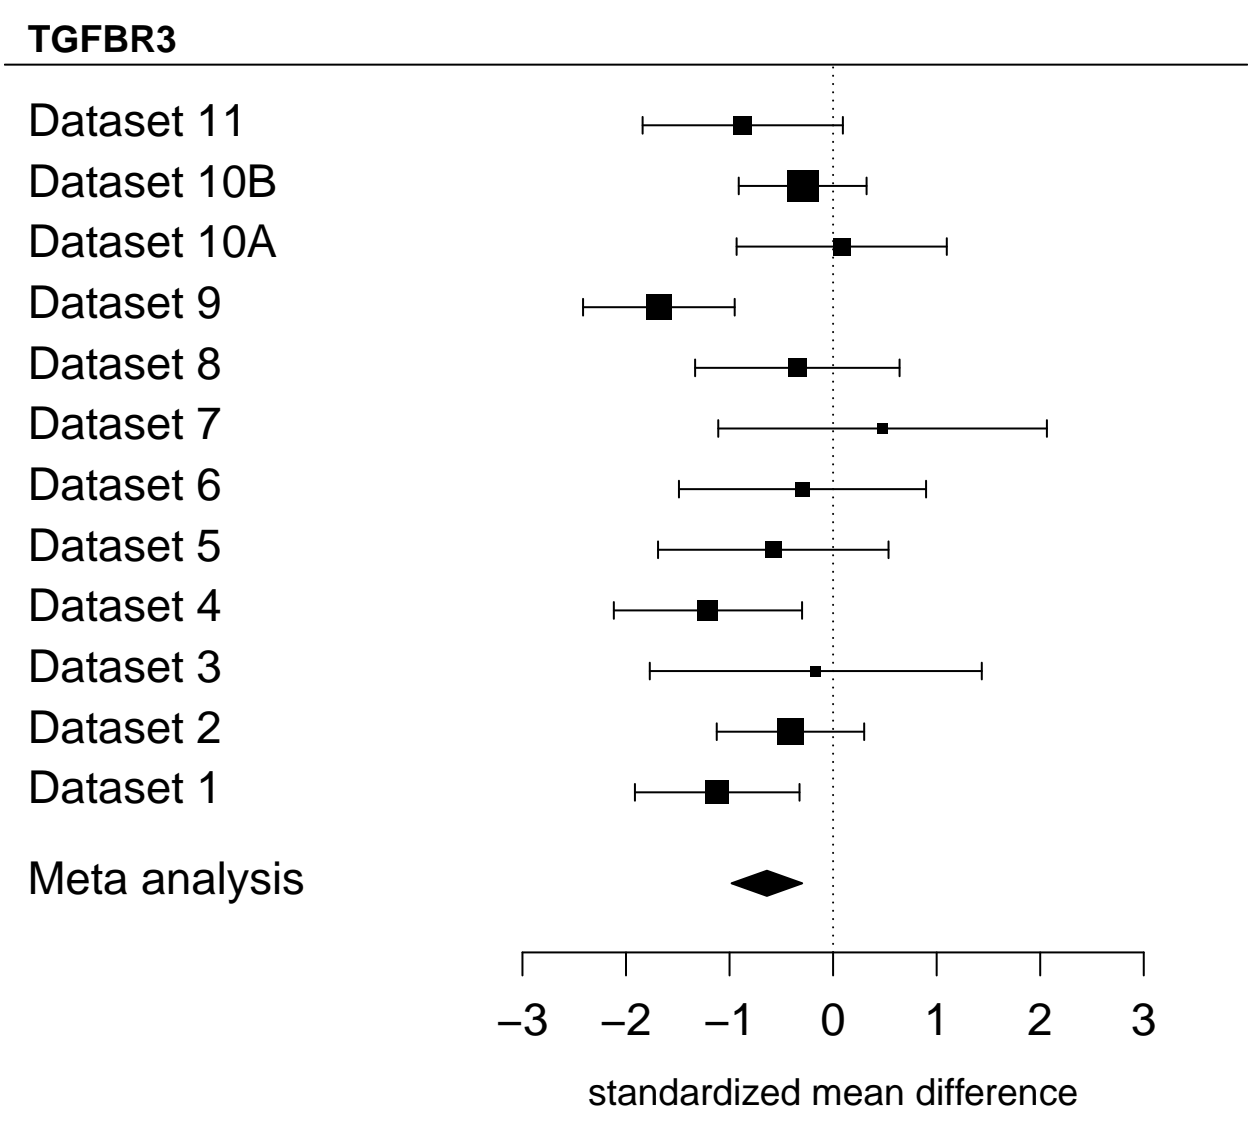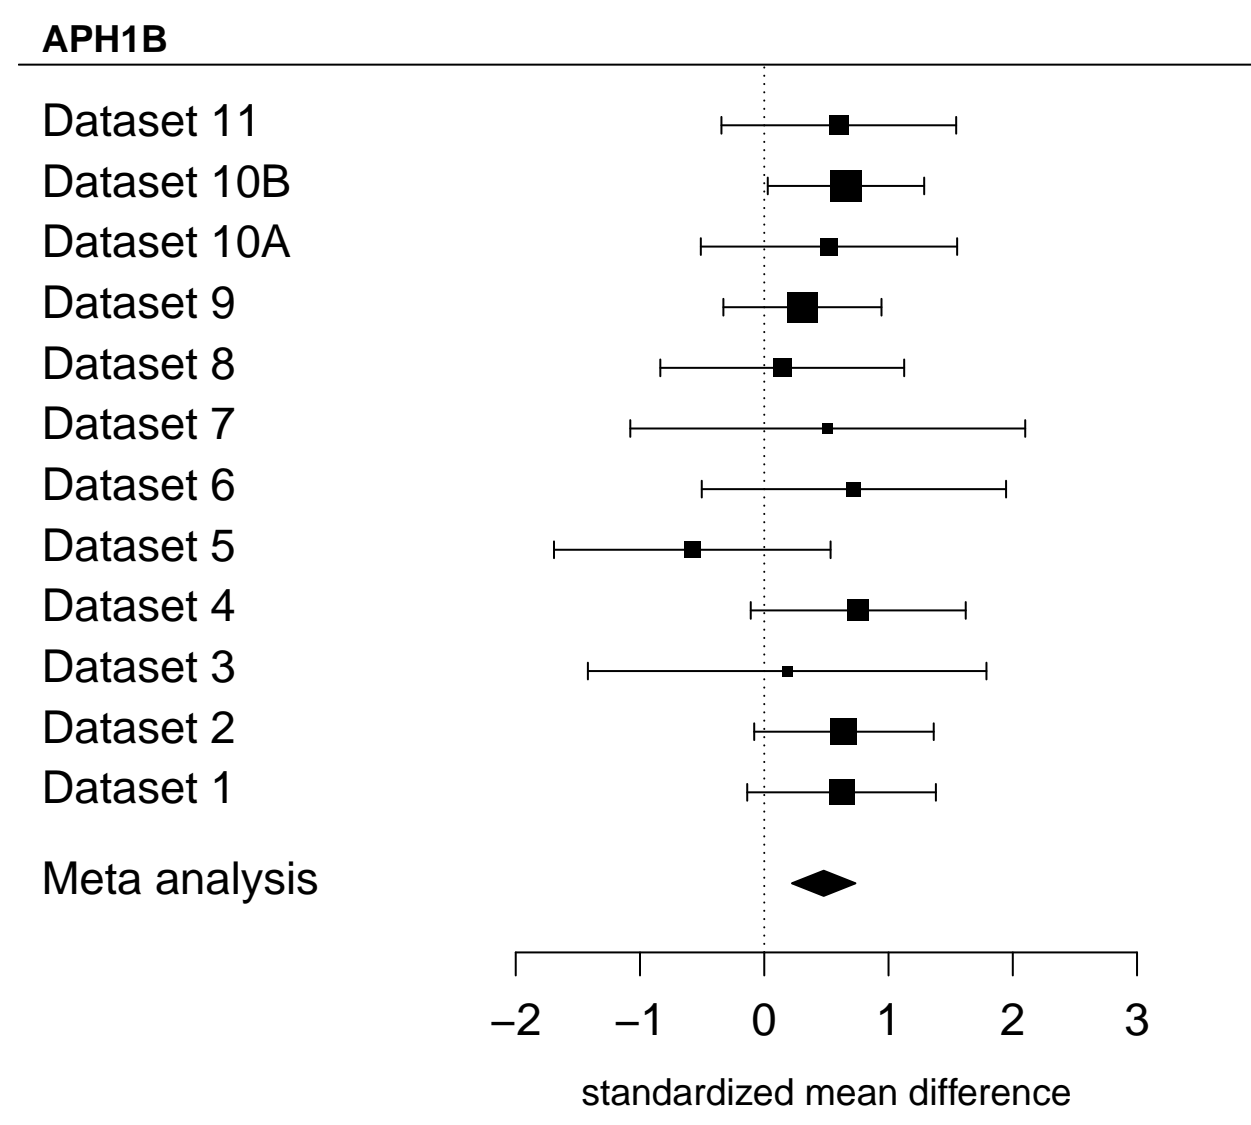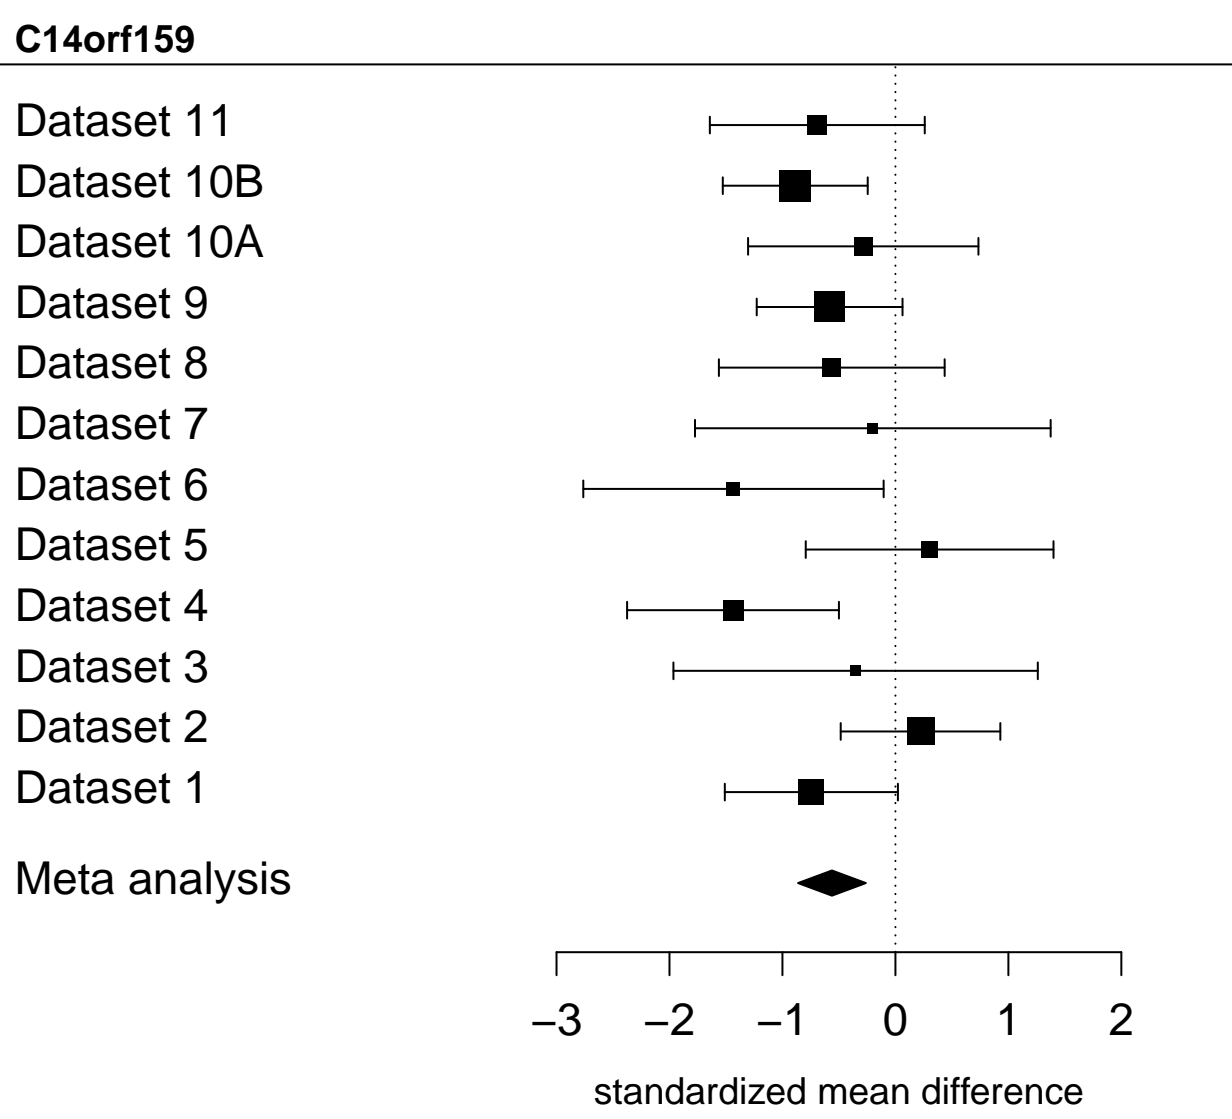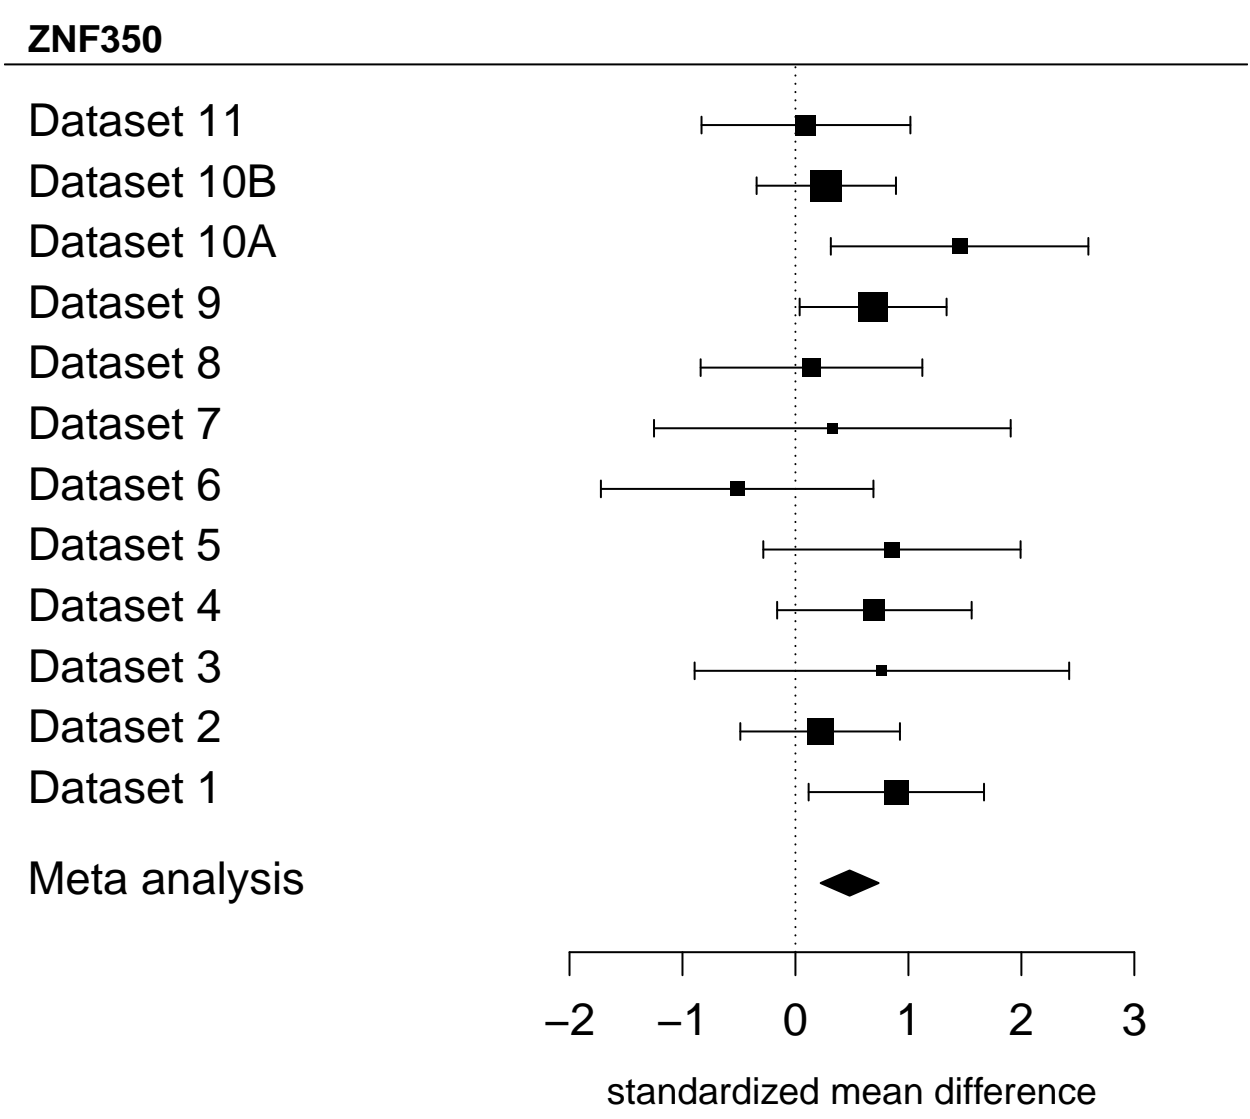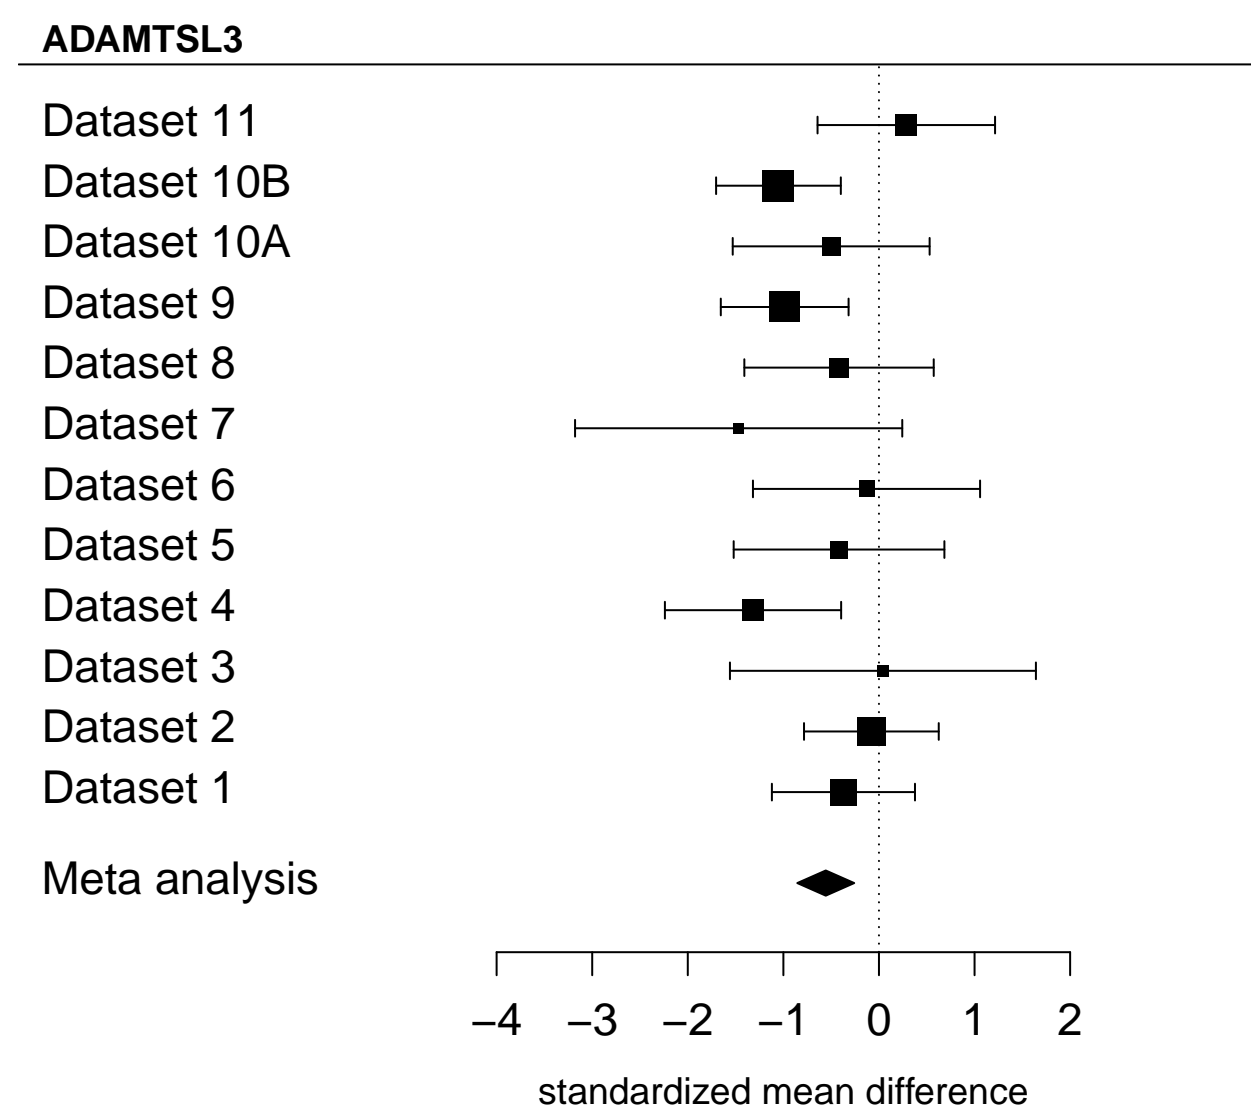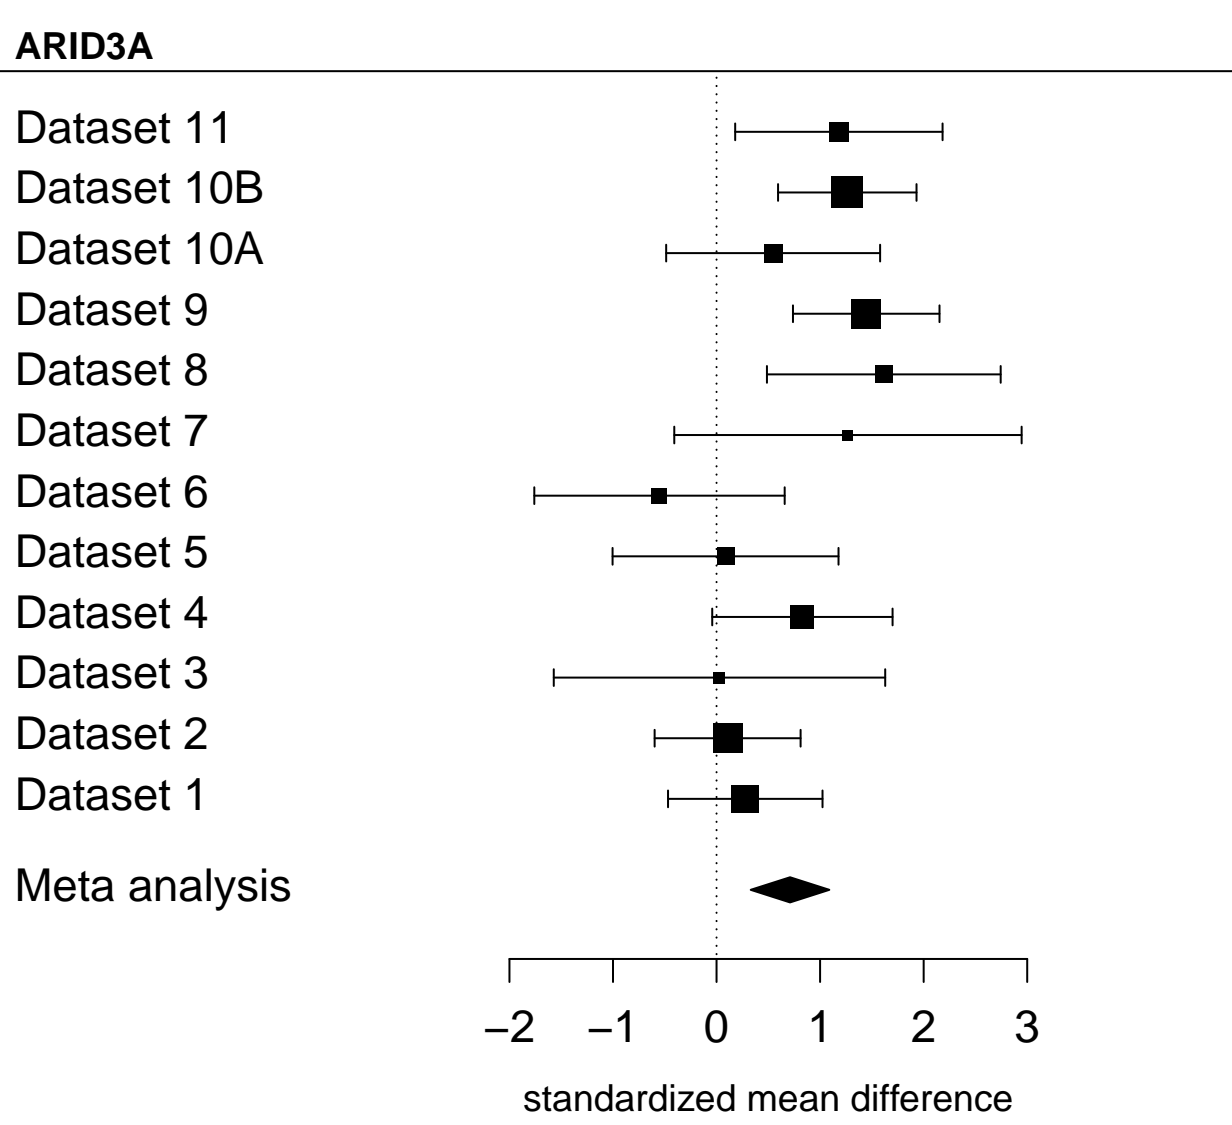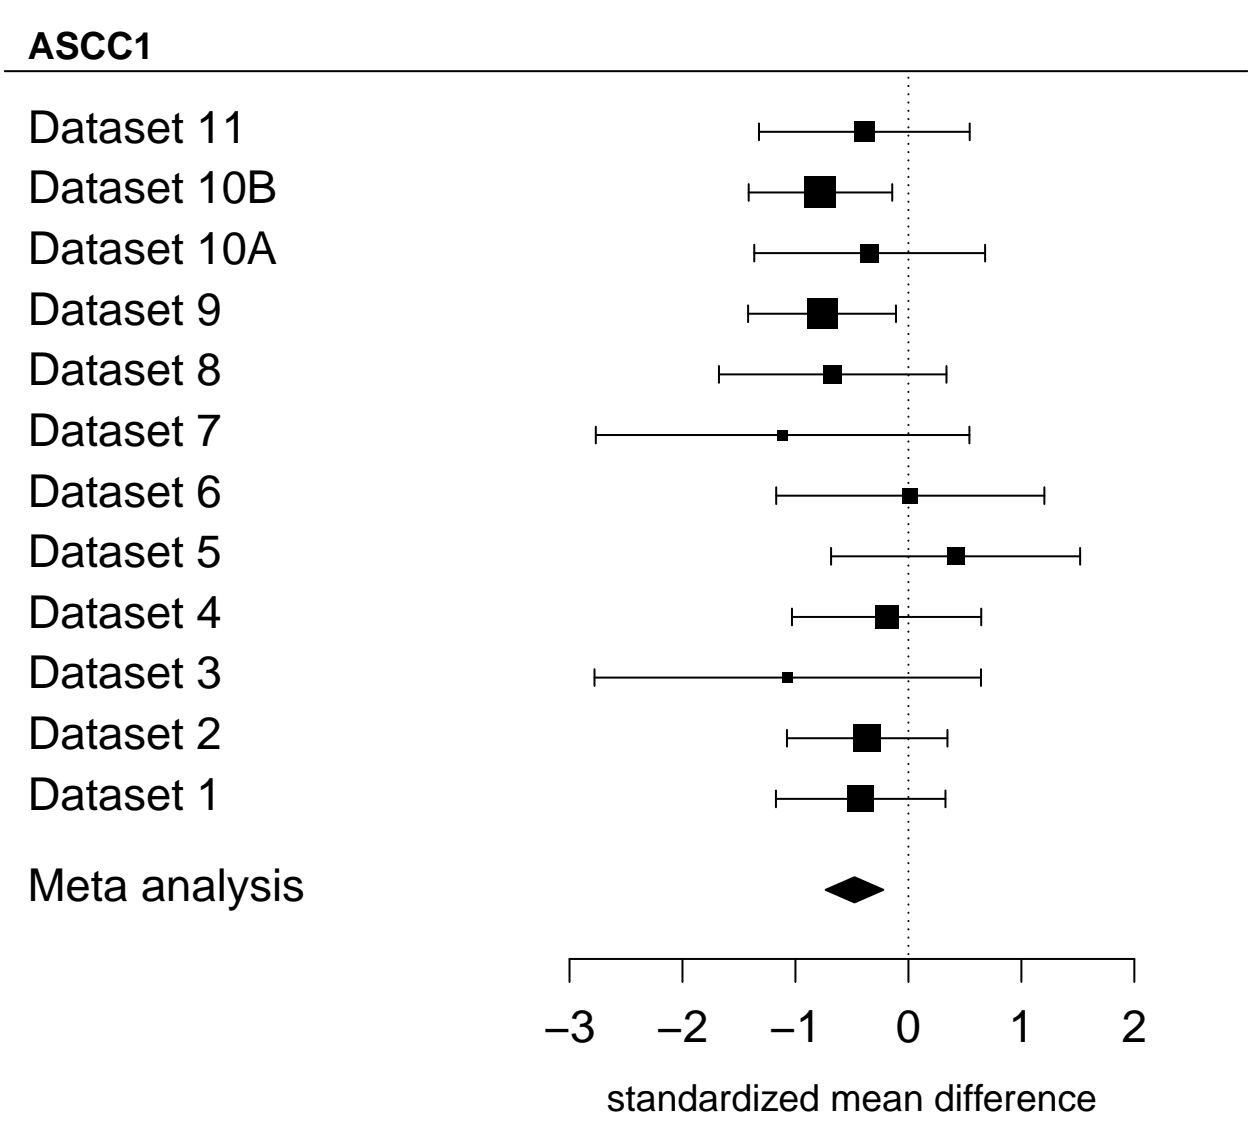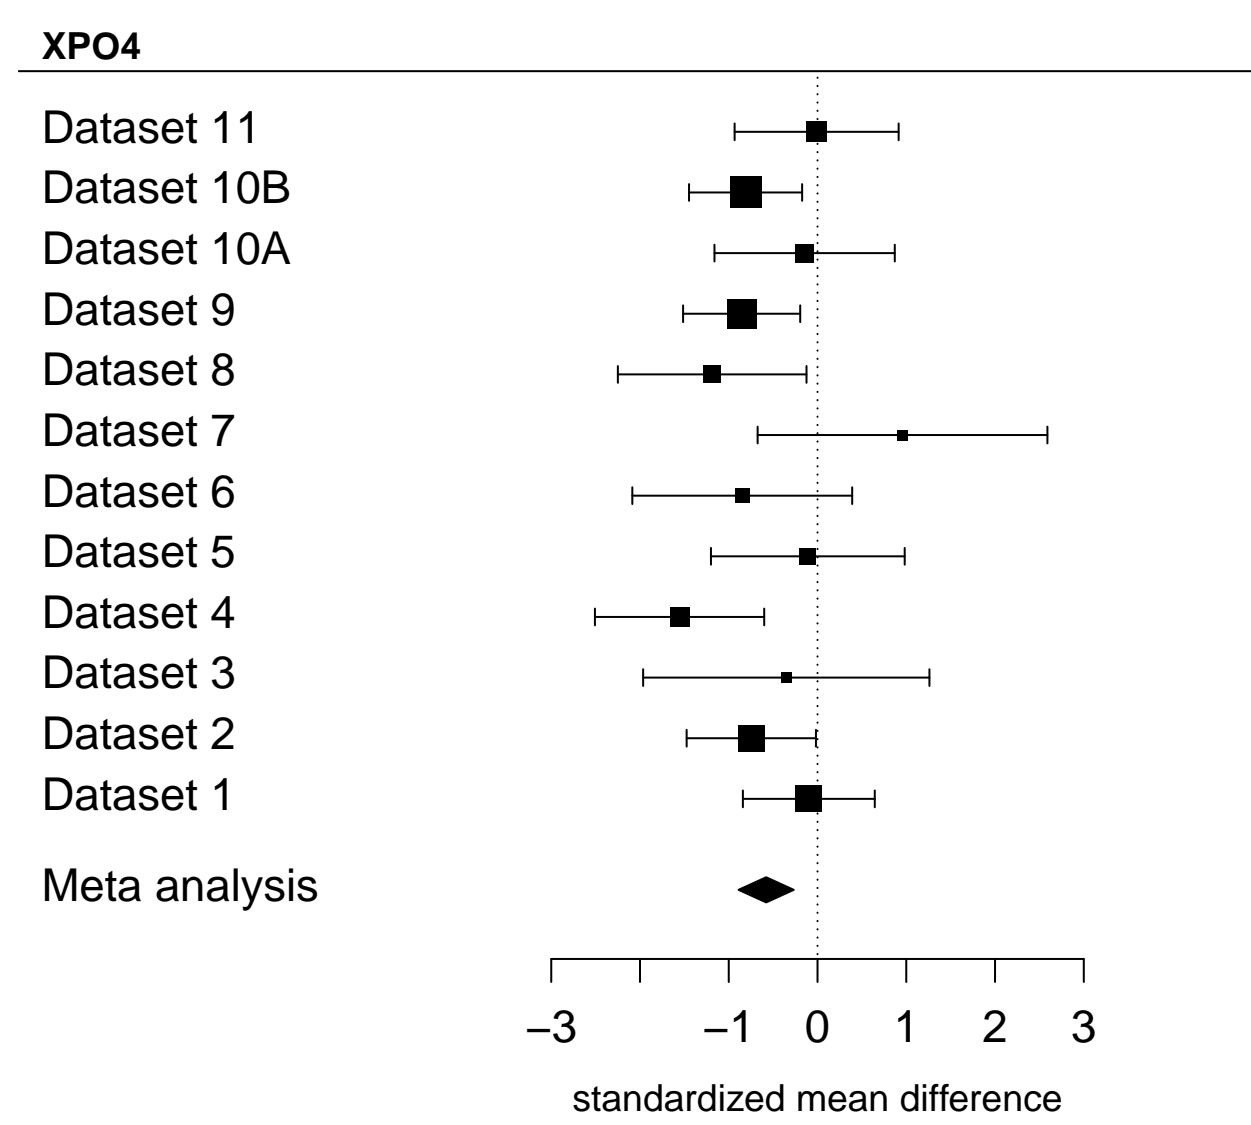



**ZEB2**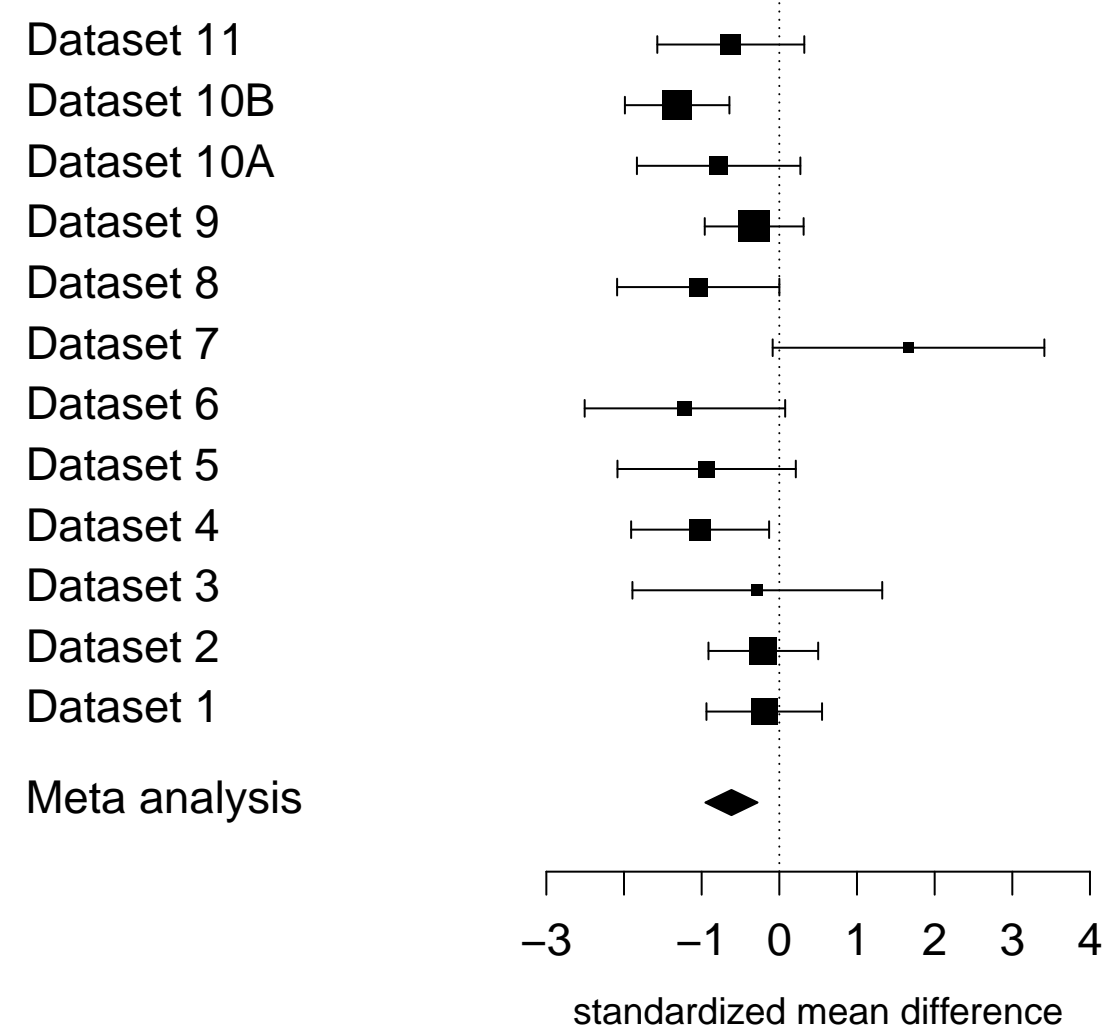**BCAT2**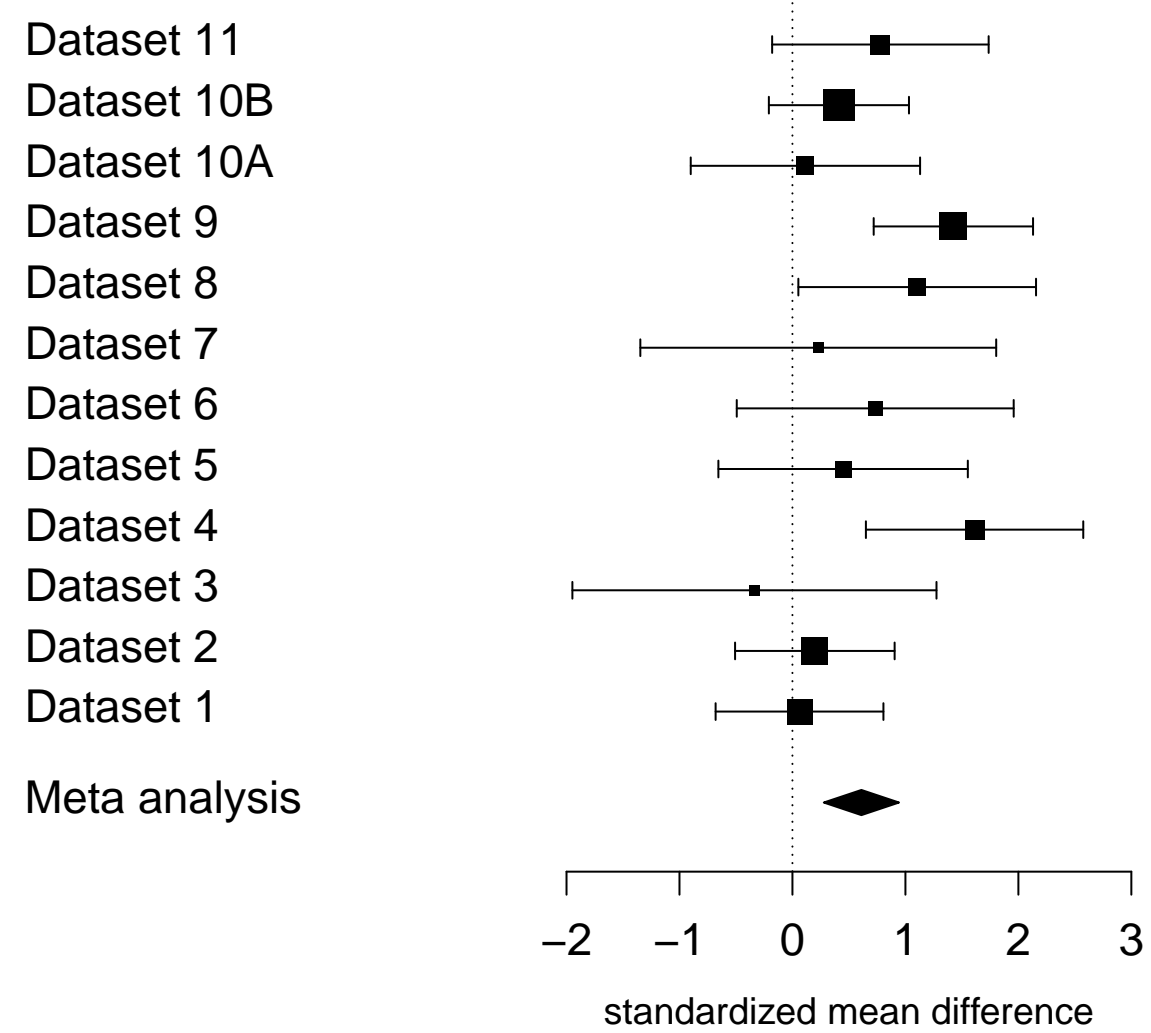**VAV3**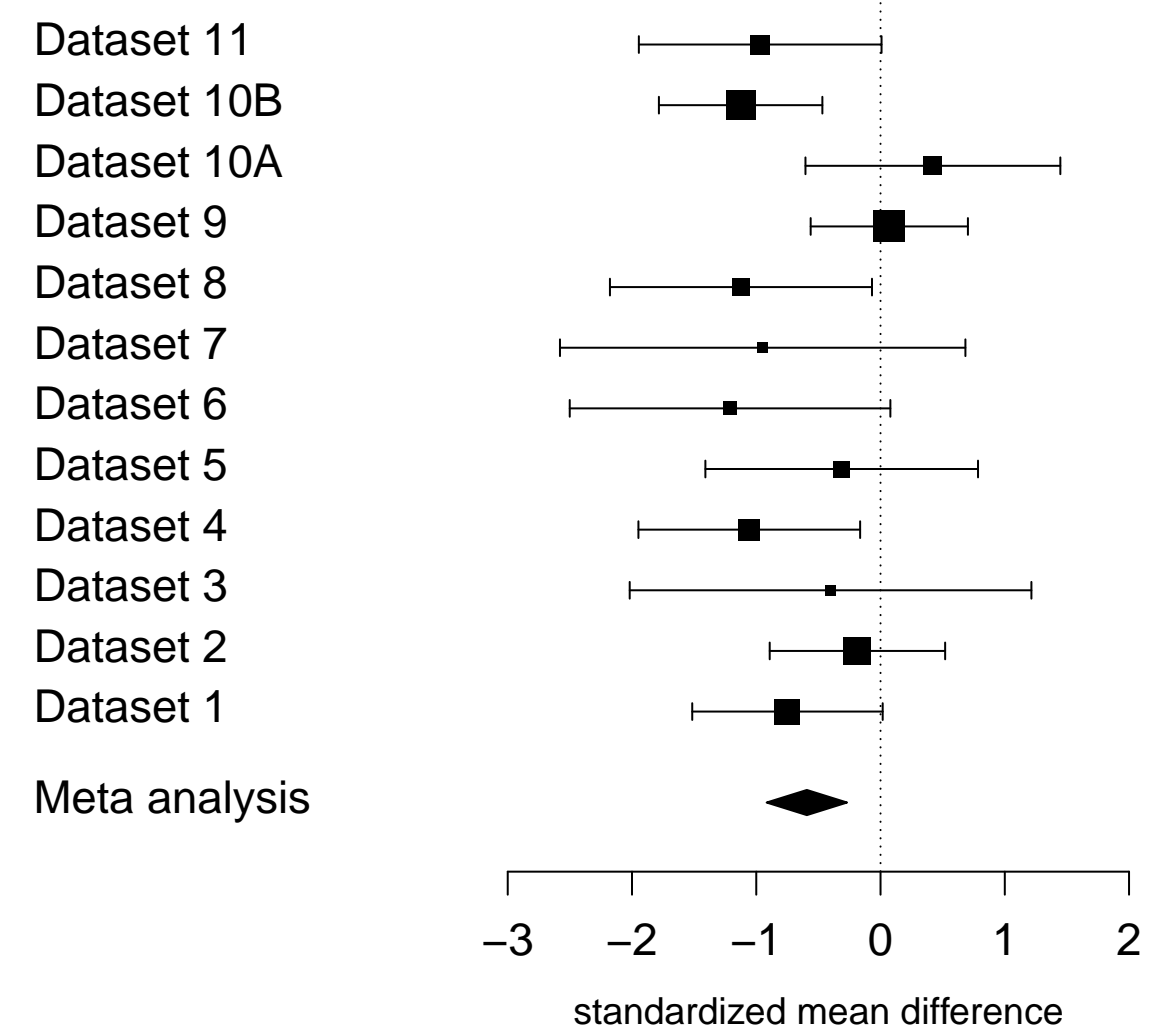**NTRK2**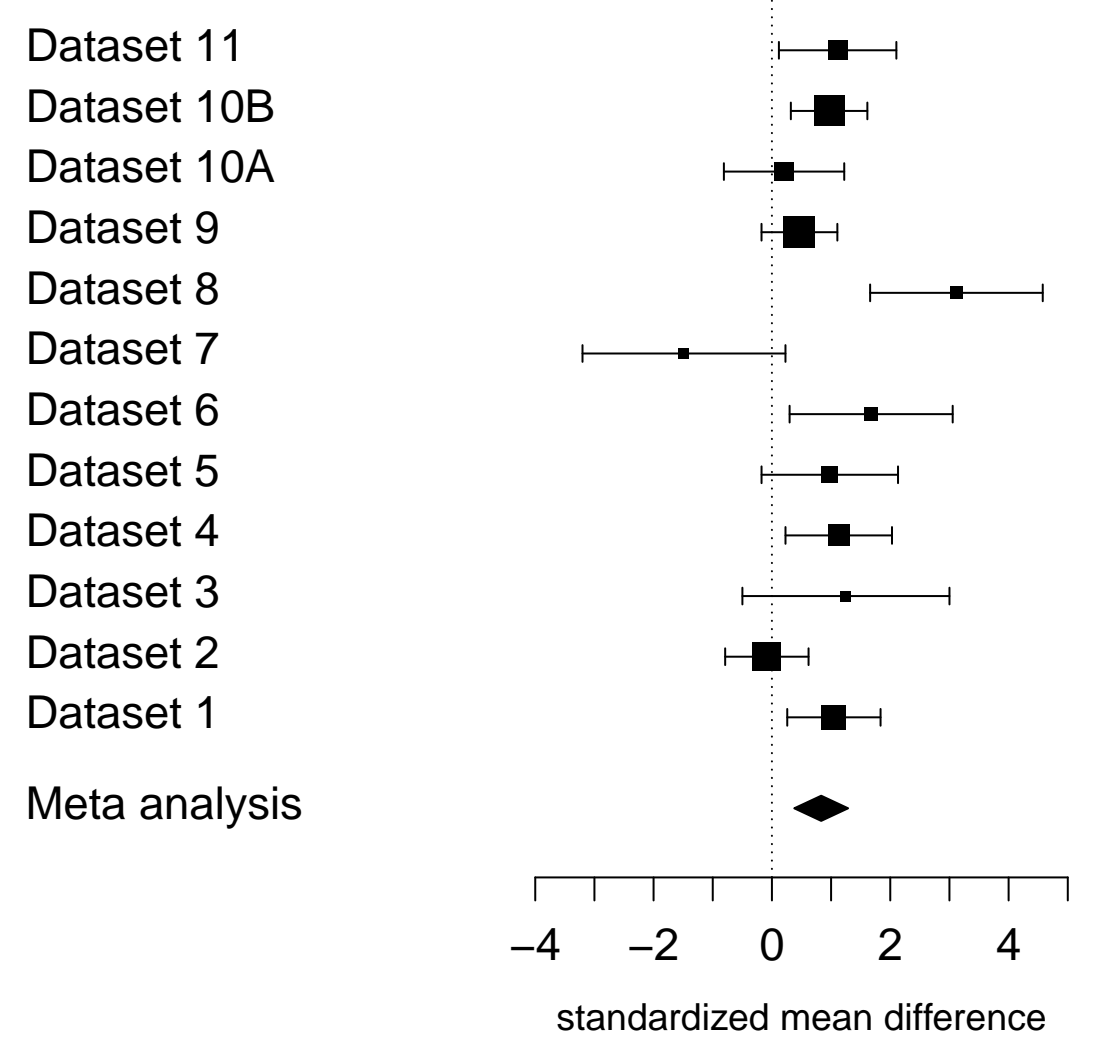**JUNB**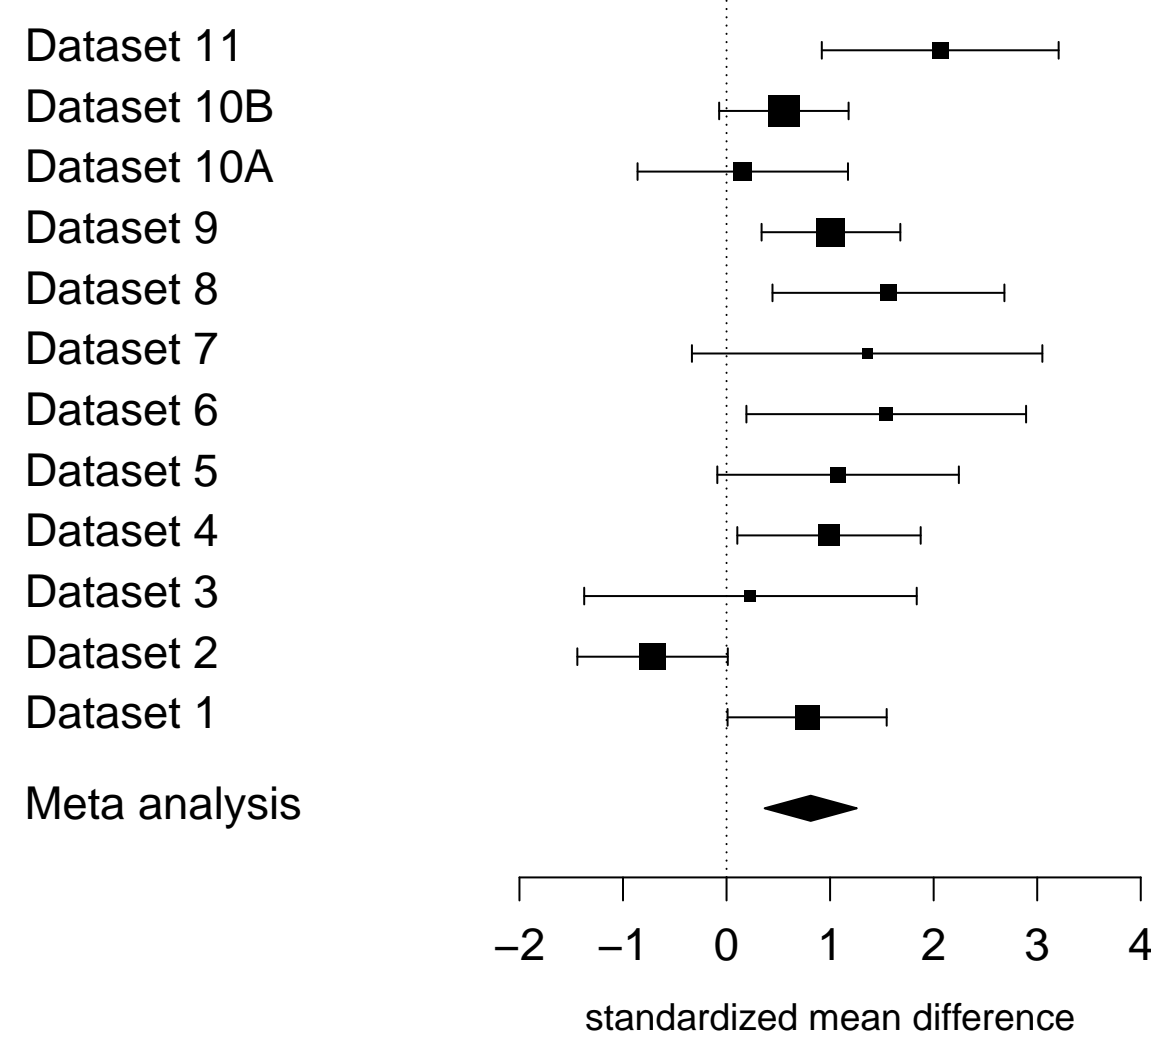**C2orf49**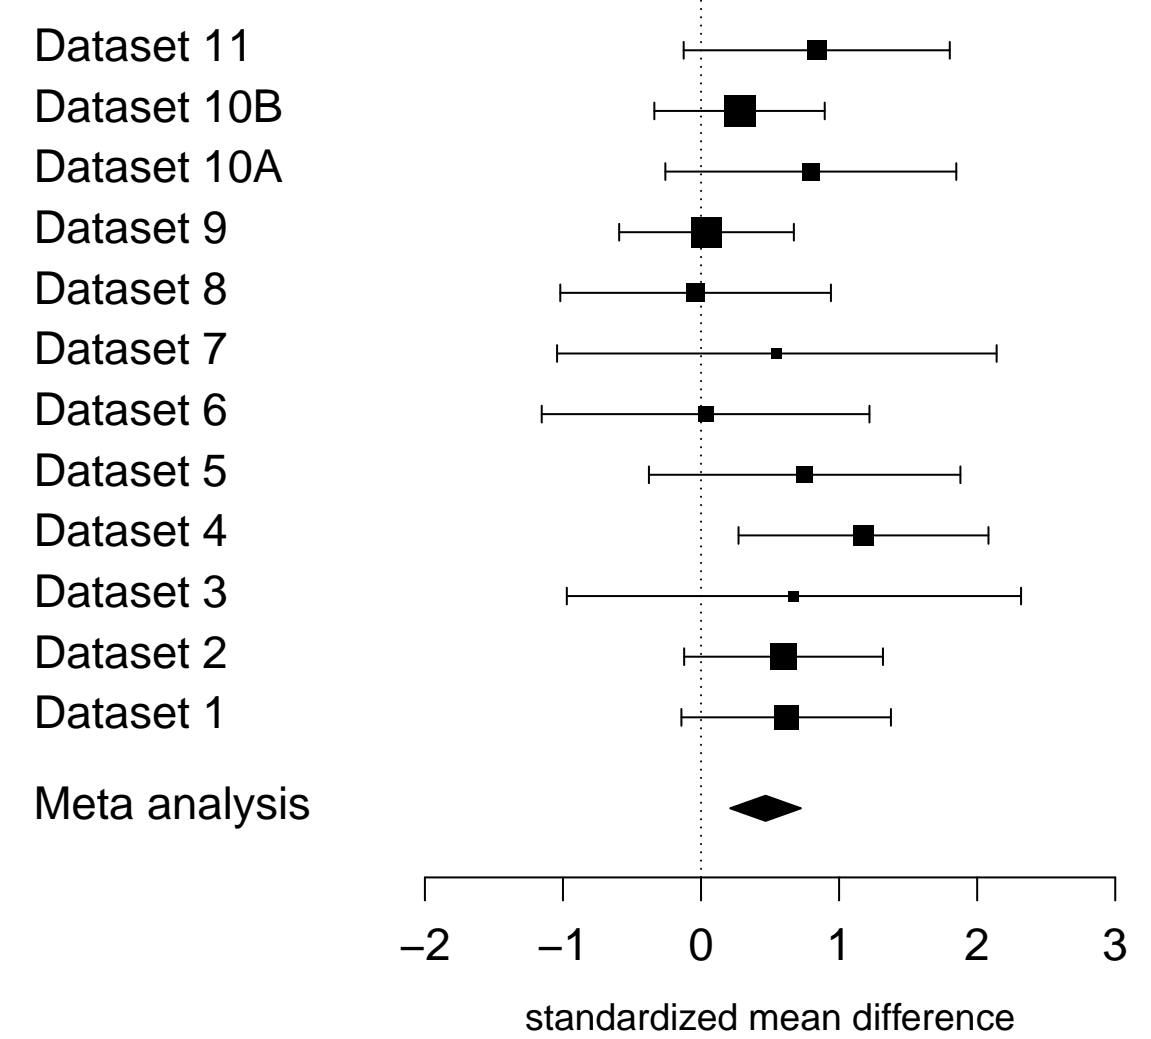**CSNK1E**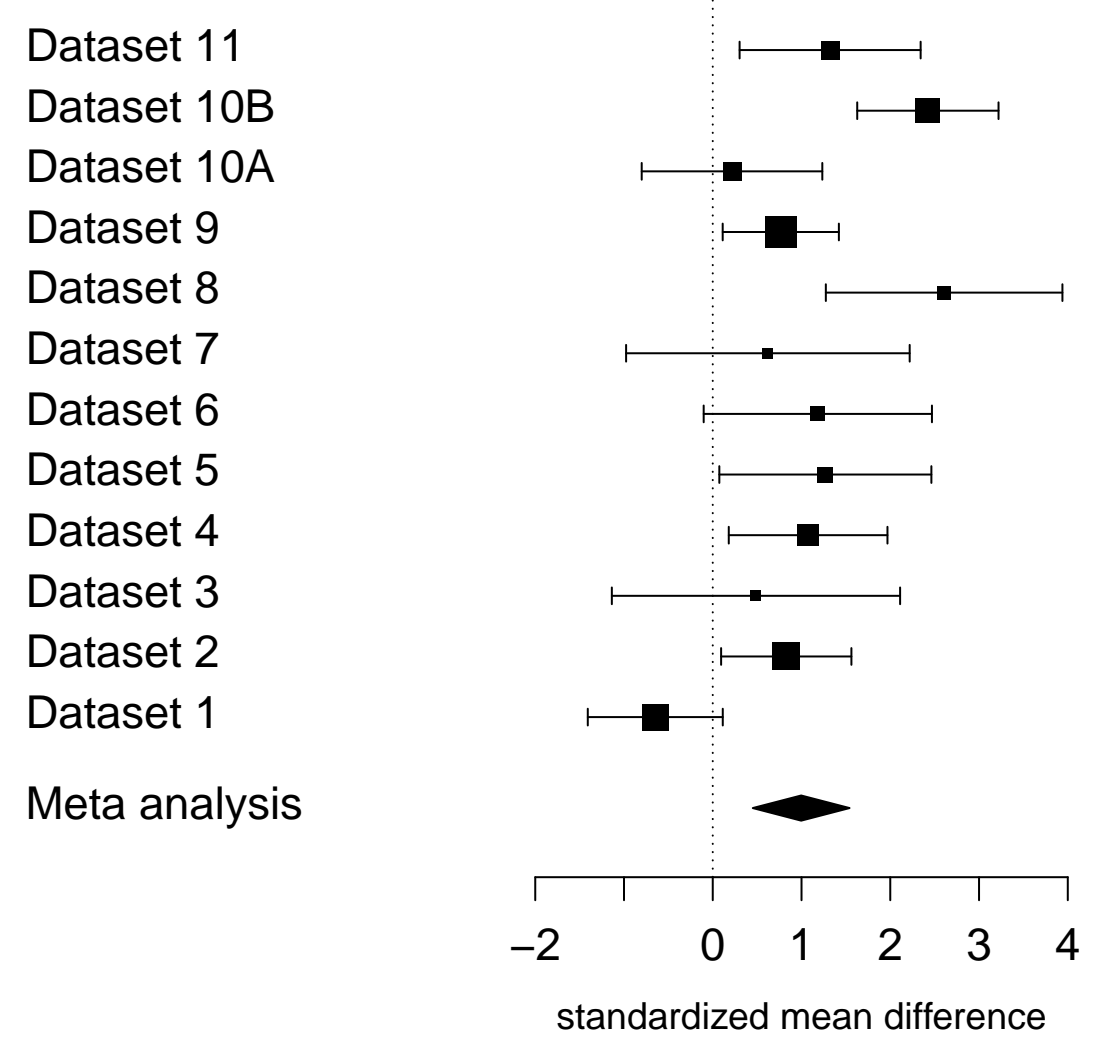**MGAT1**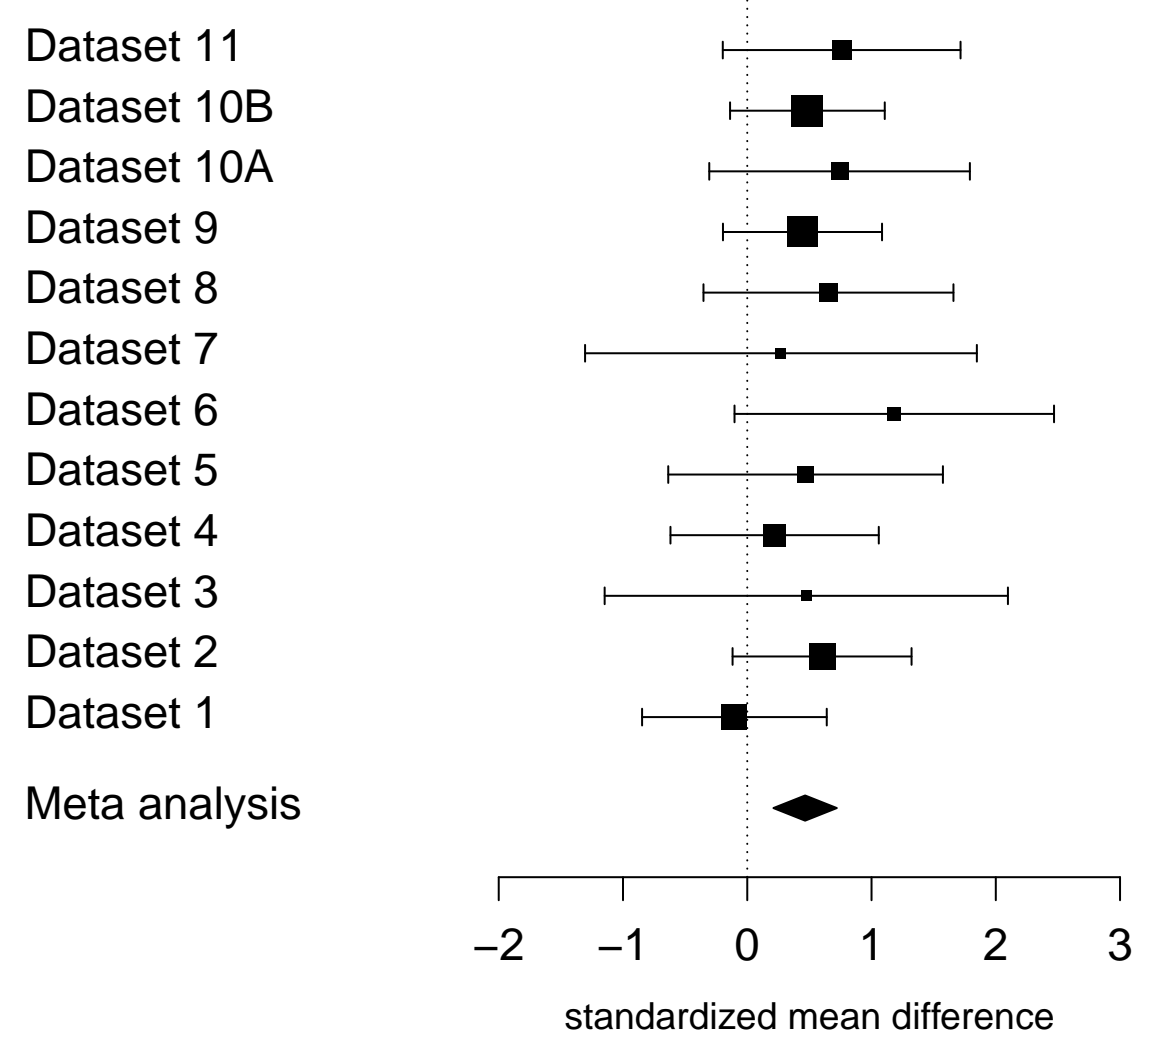**KLRD1**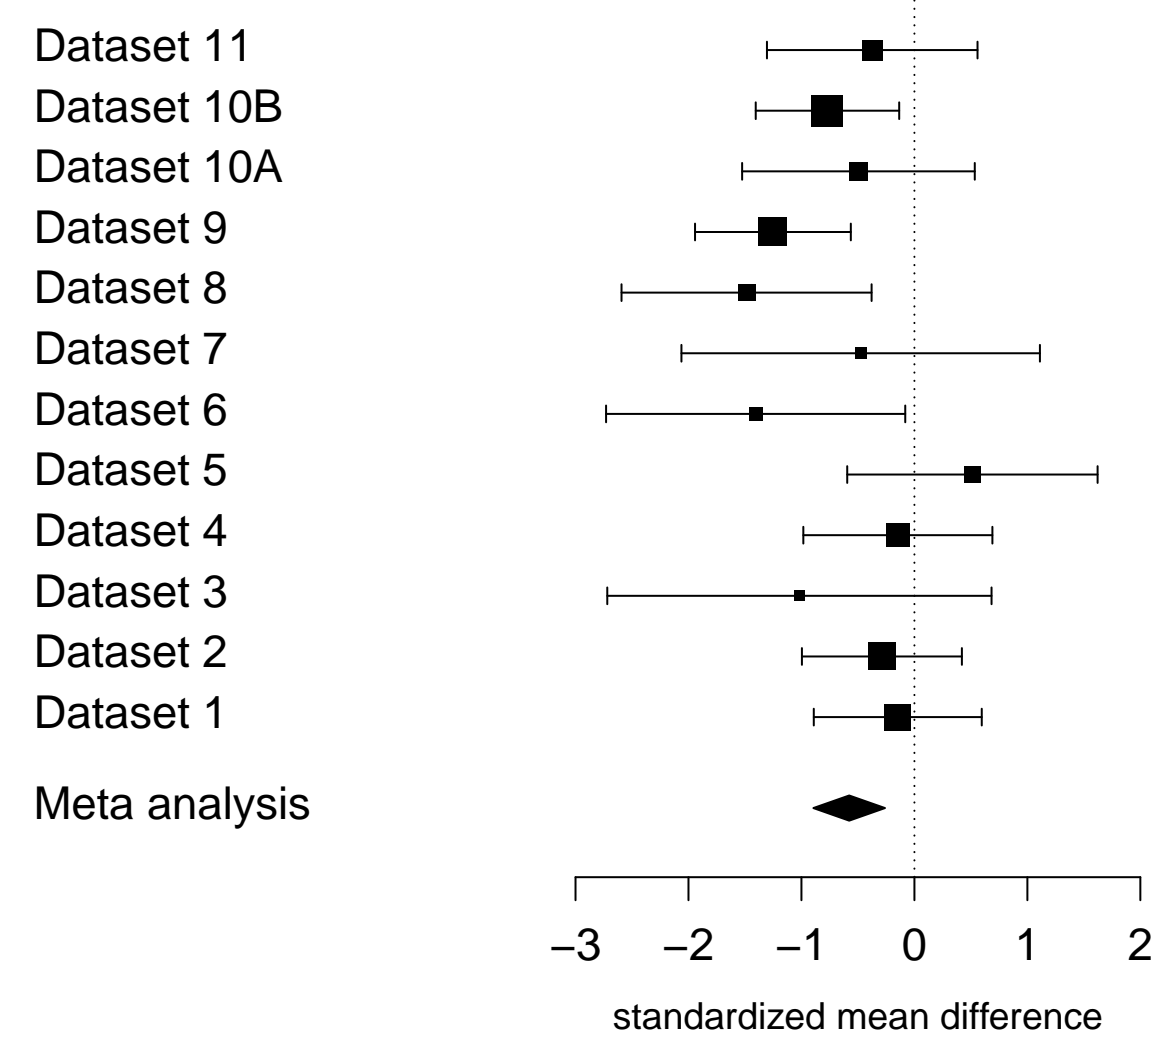**POMGNT1**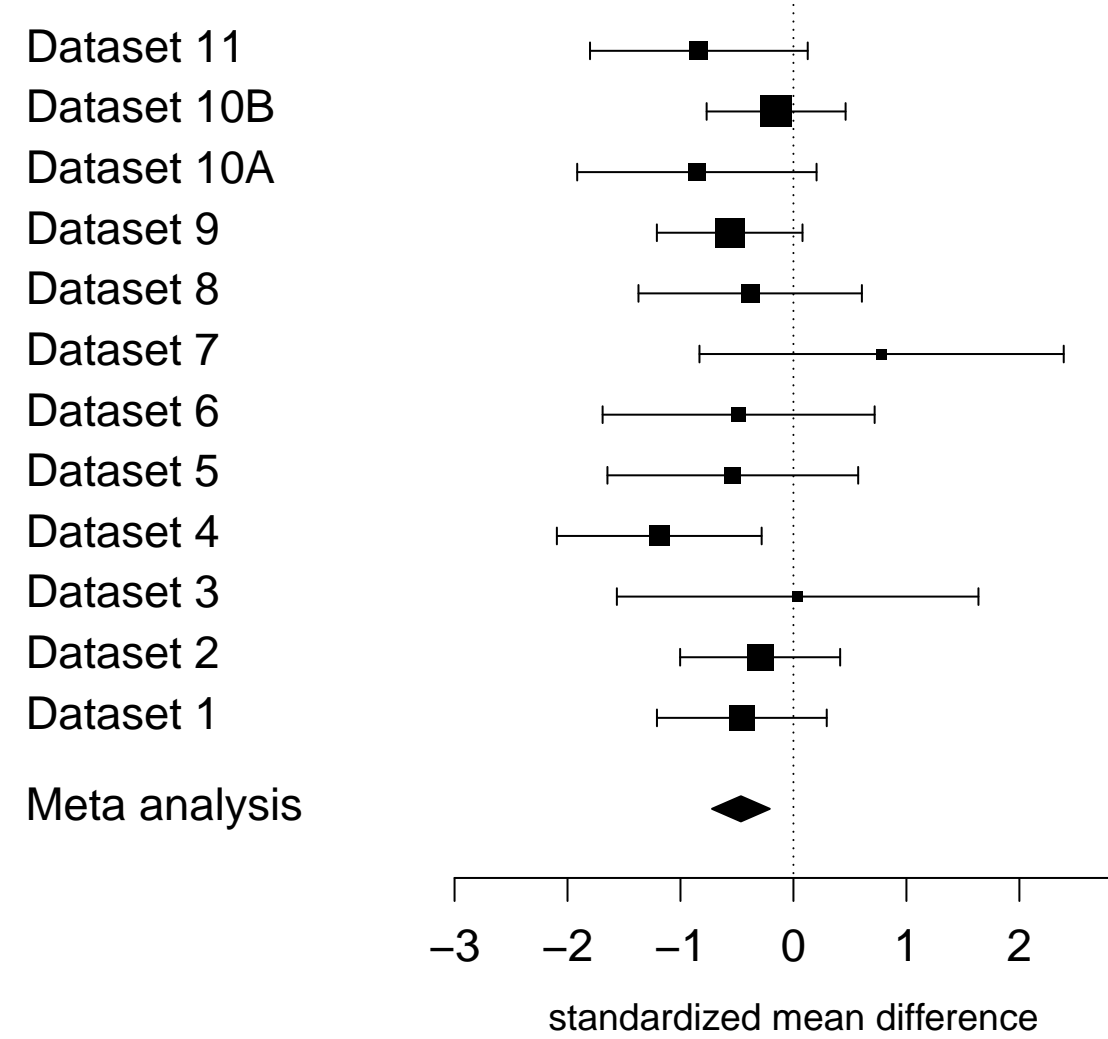**PTRF**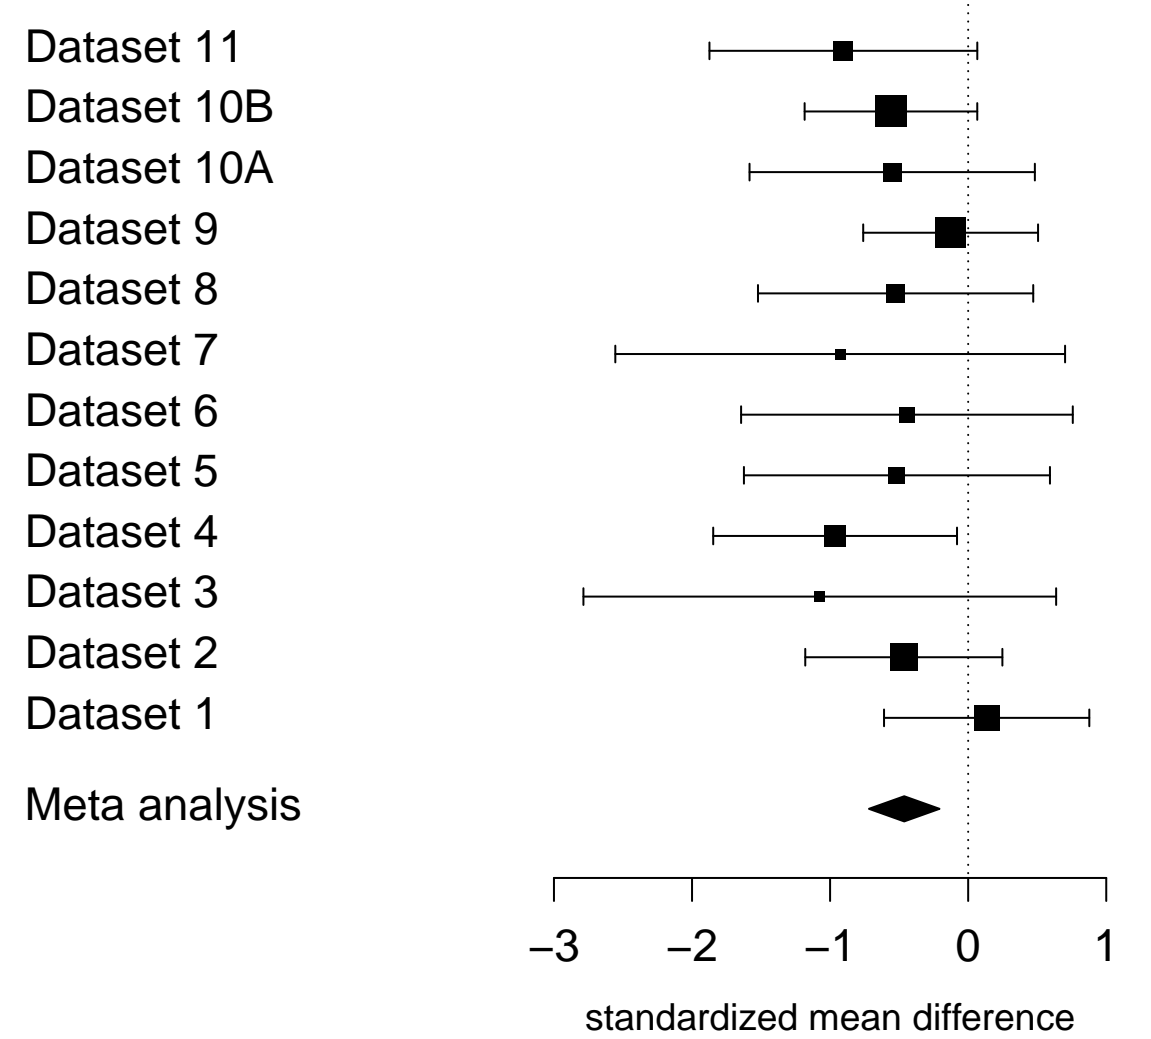**CLDN5**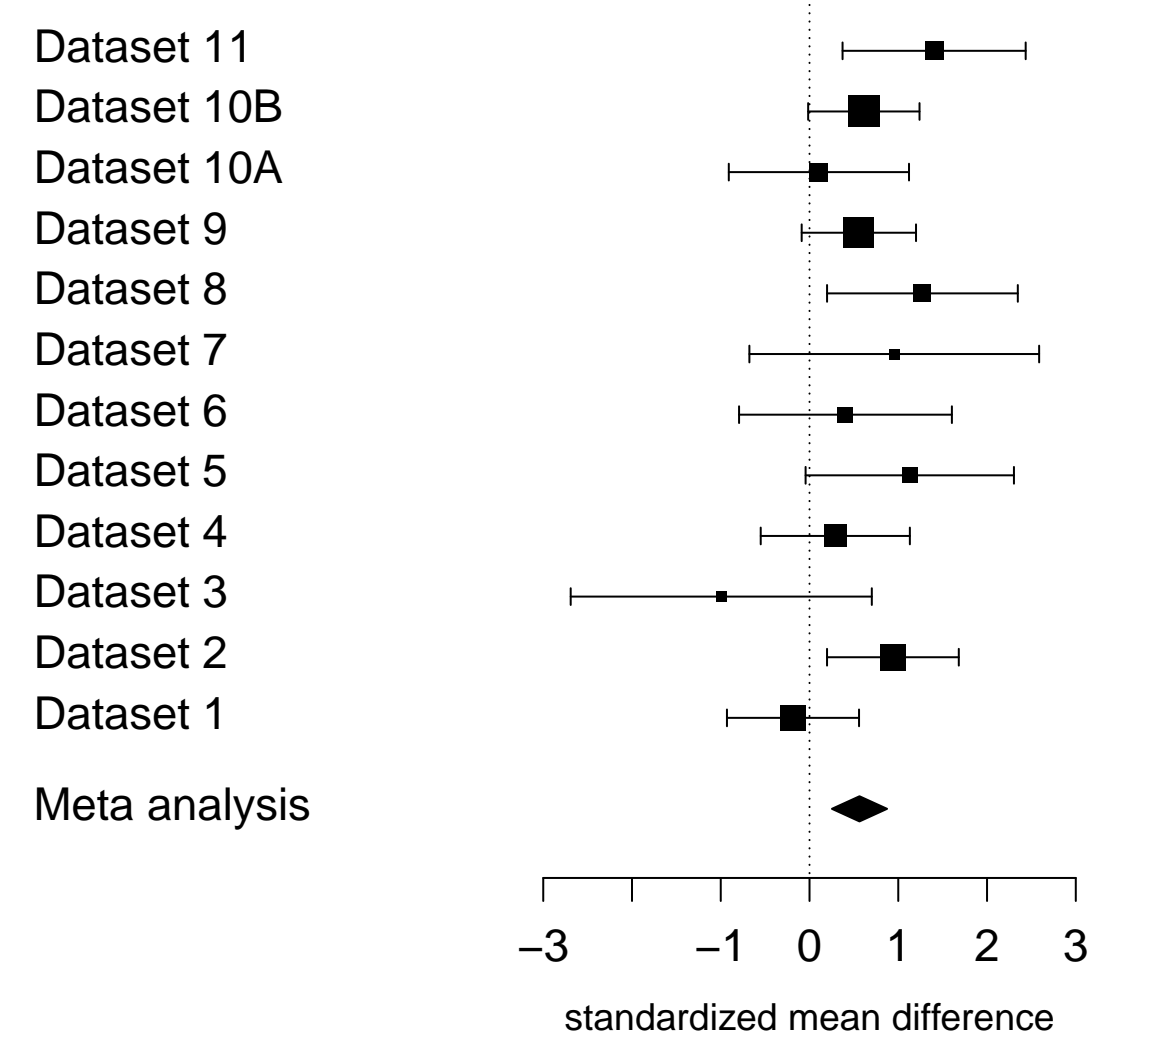

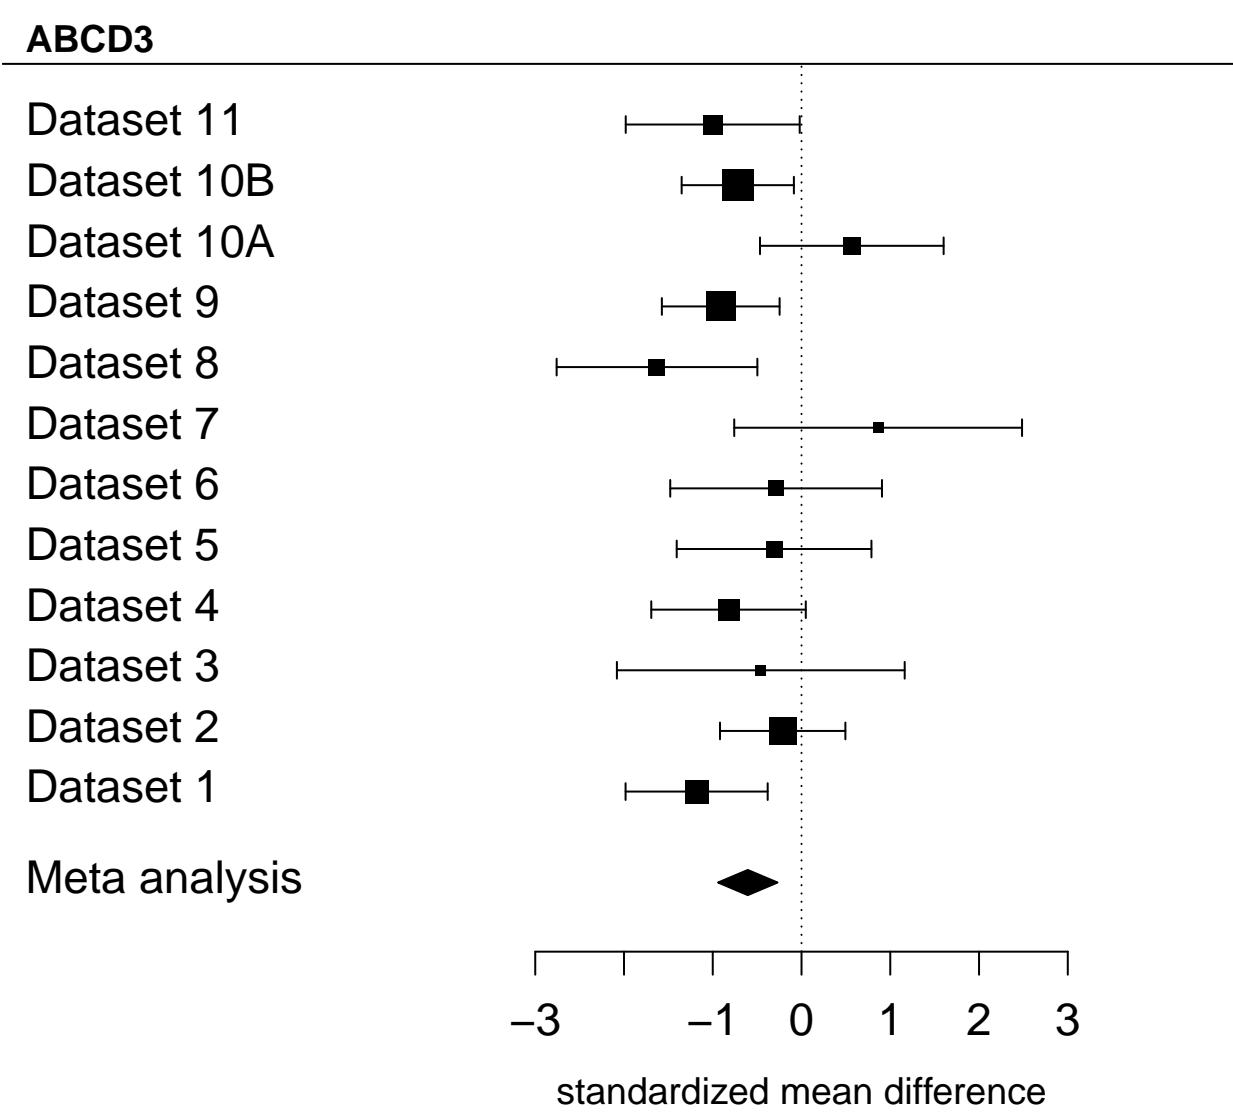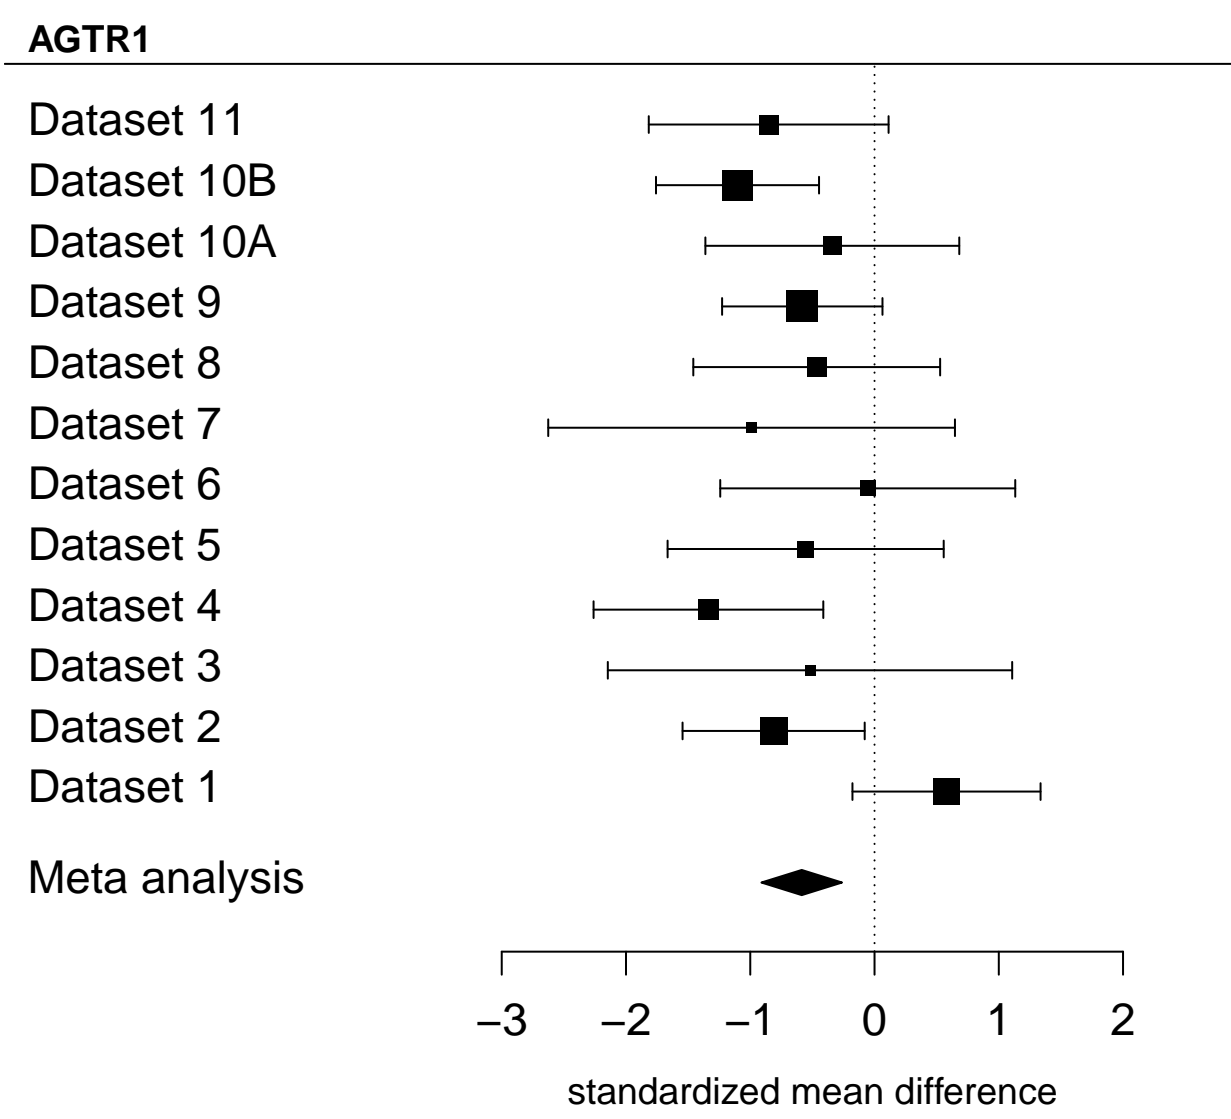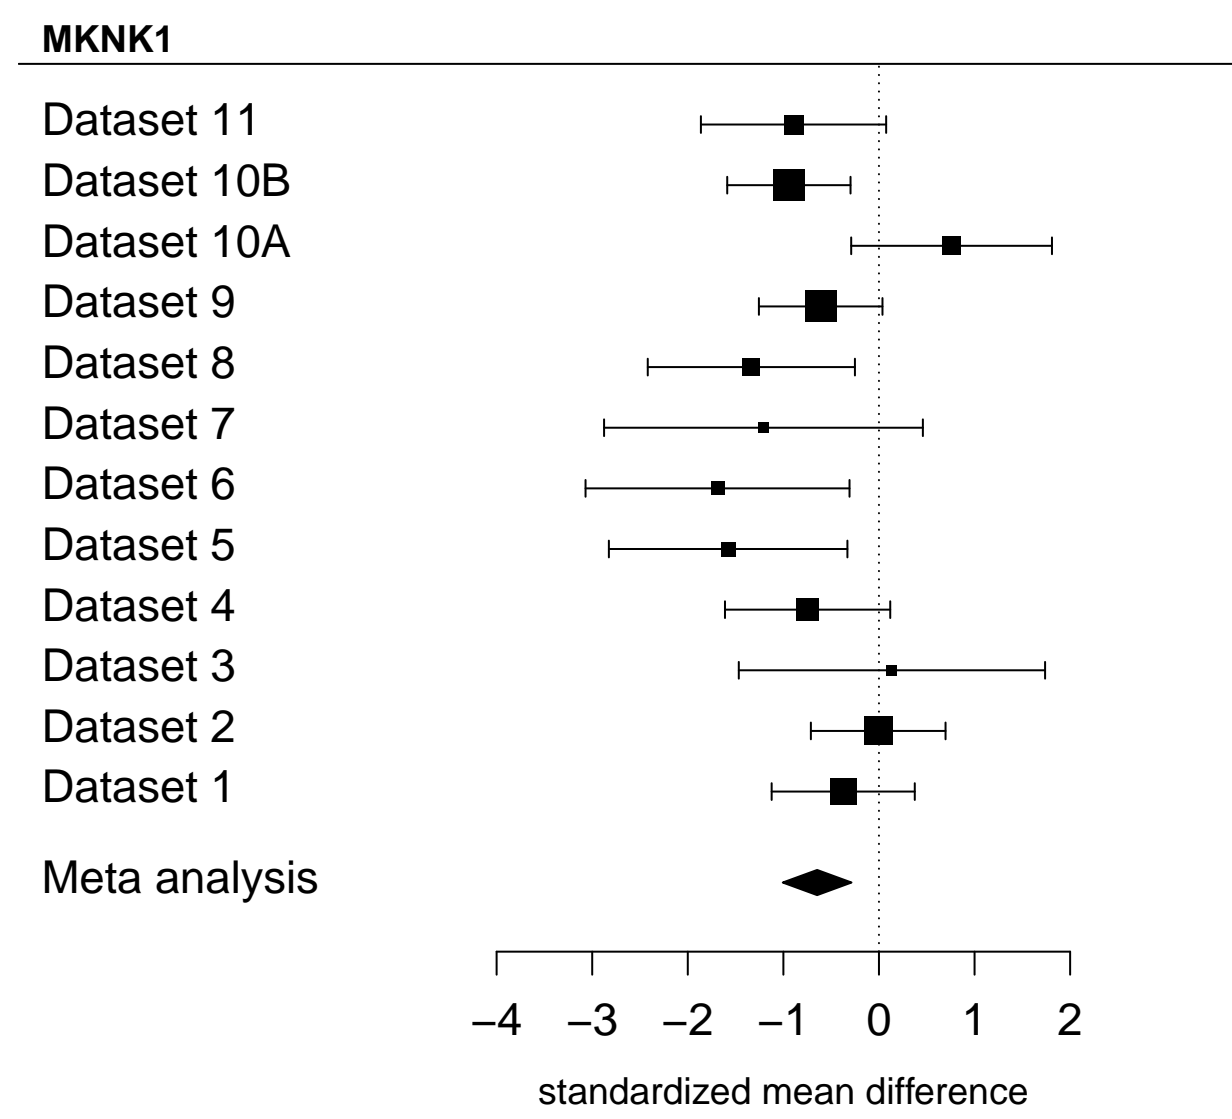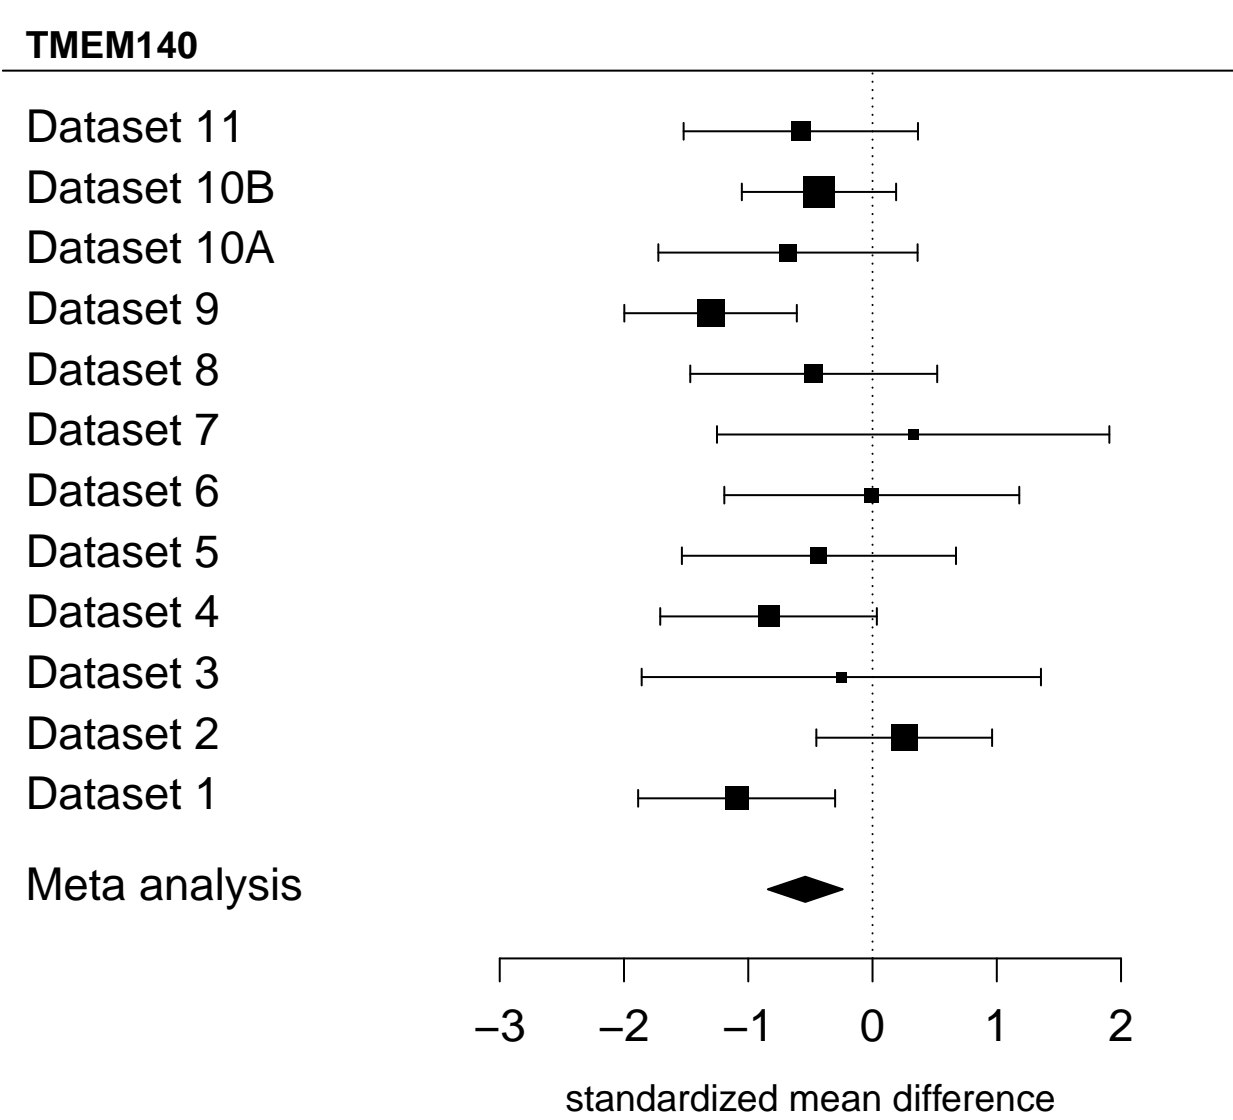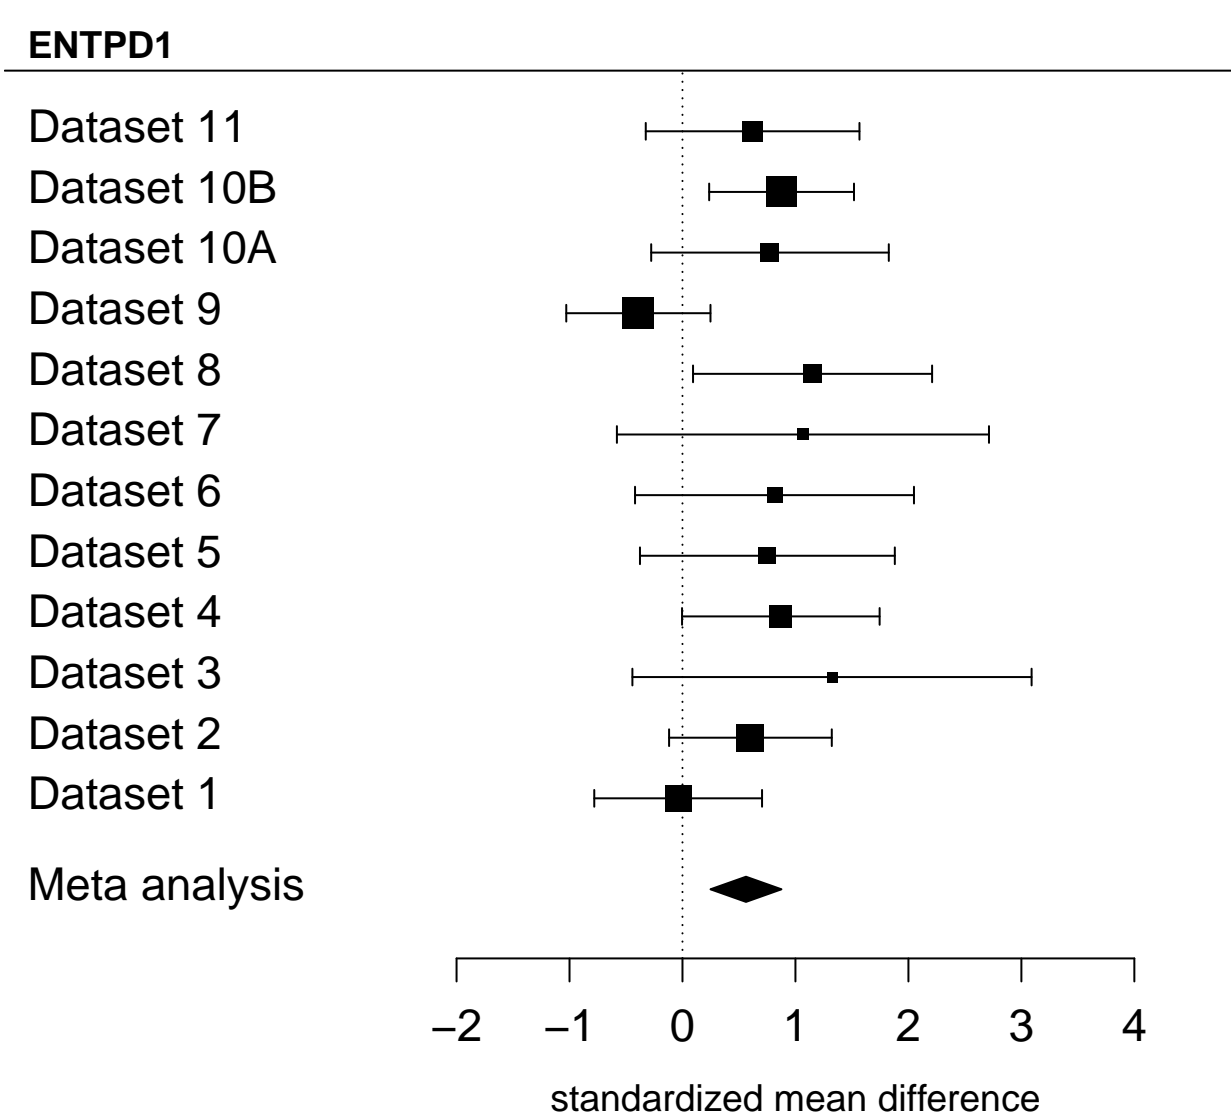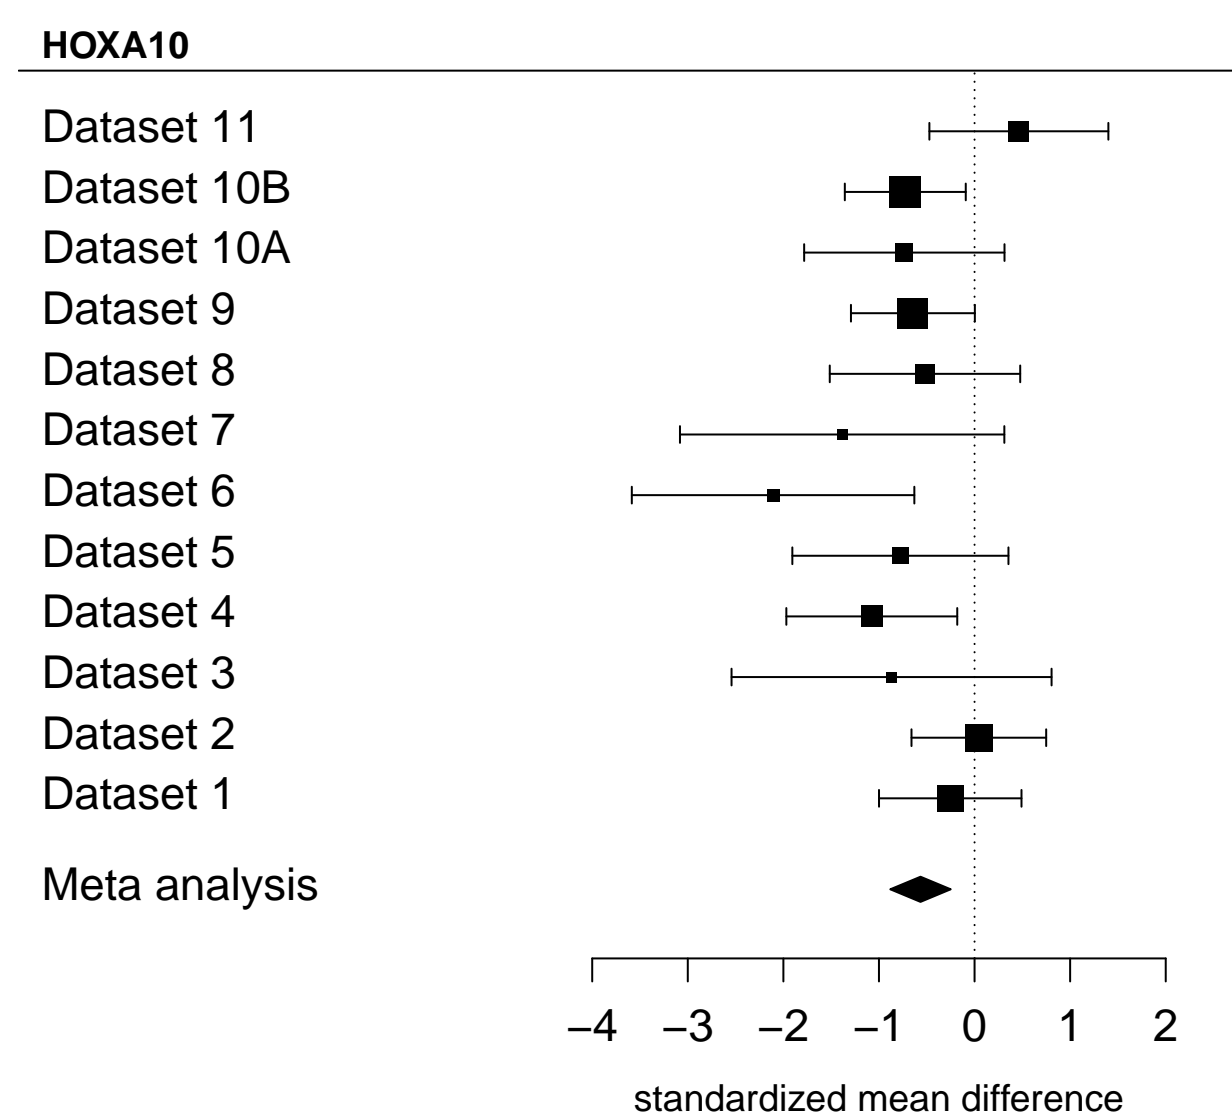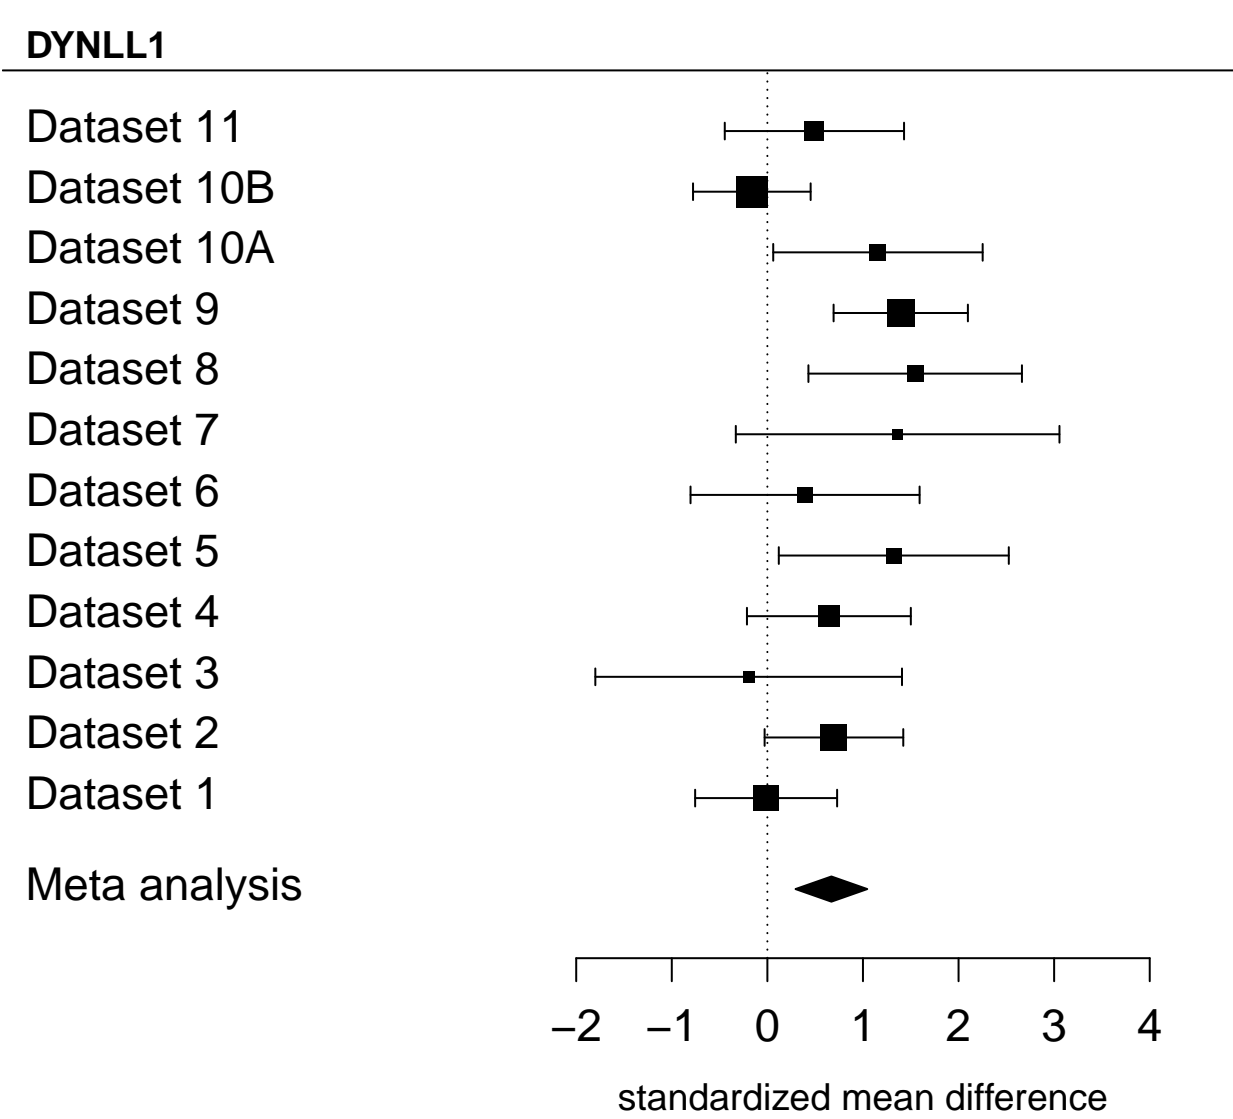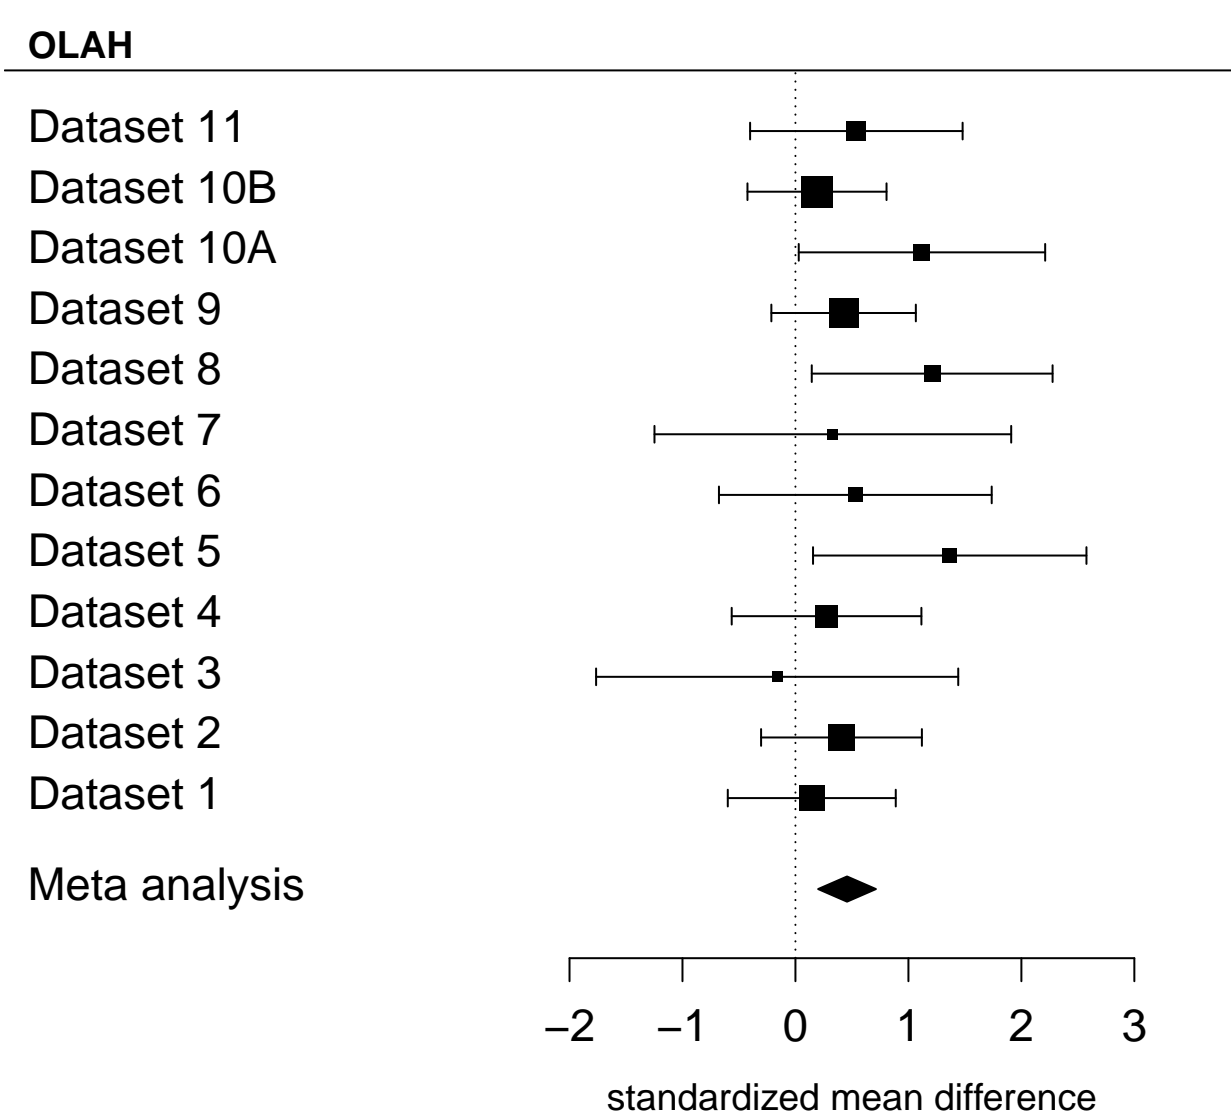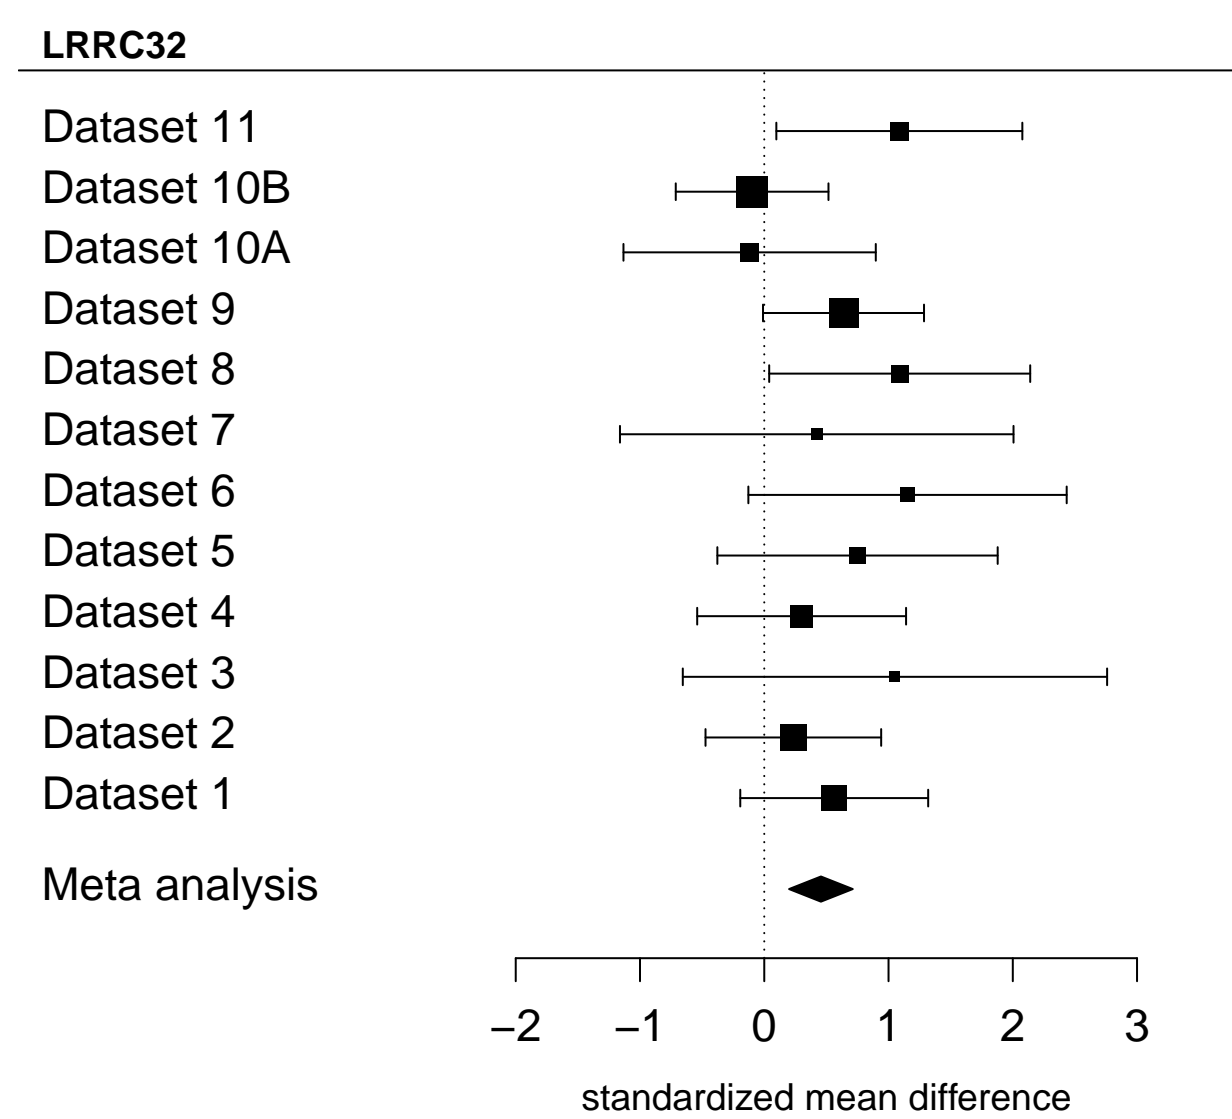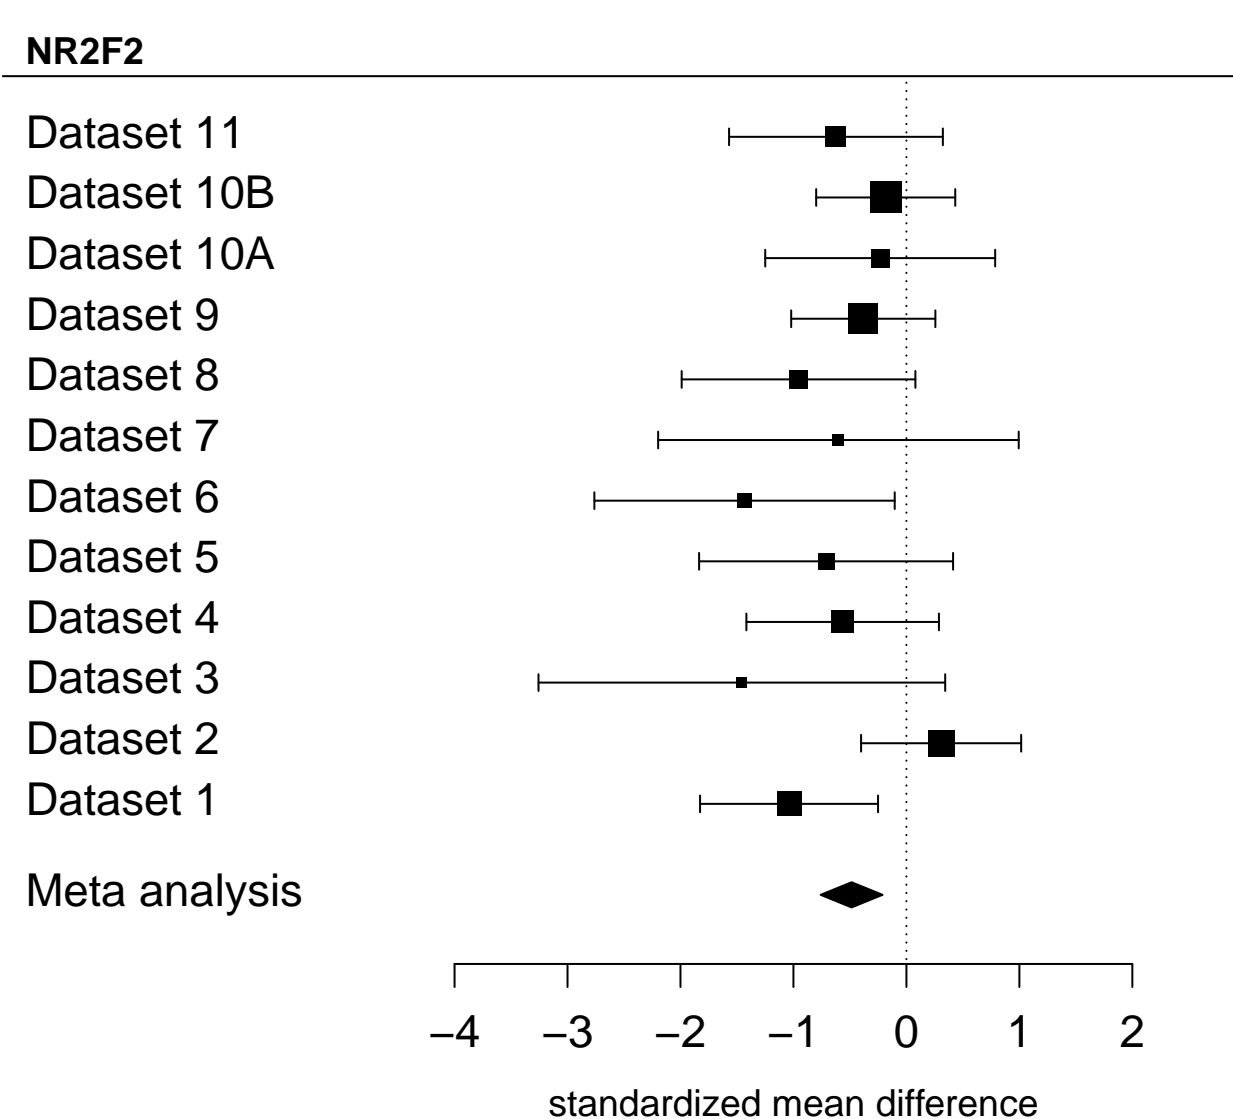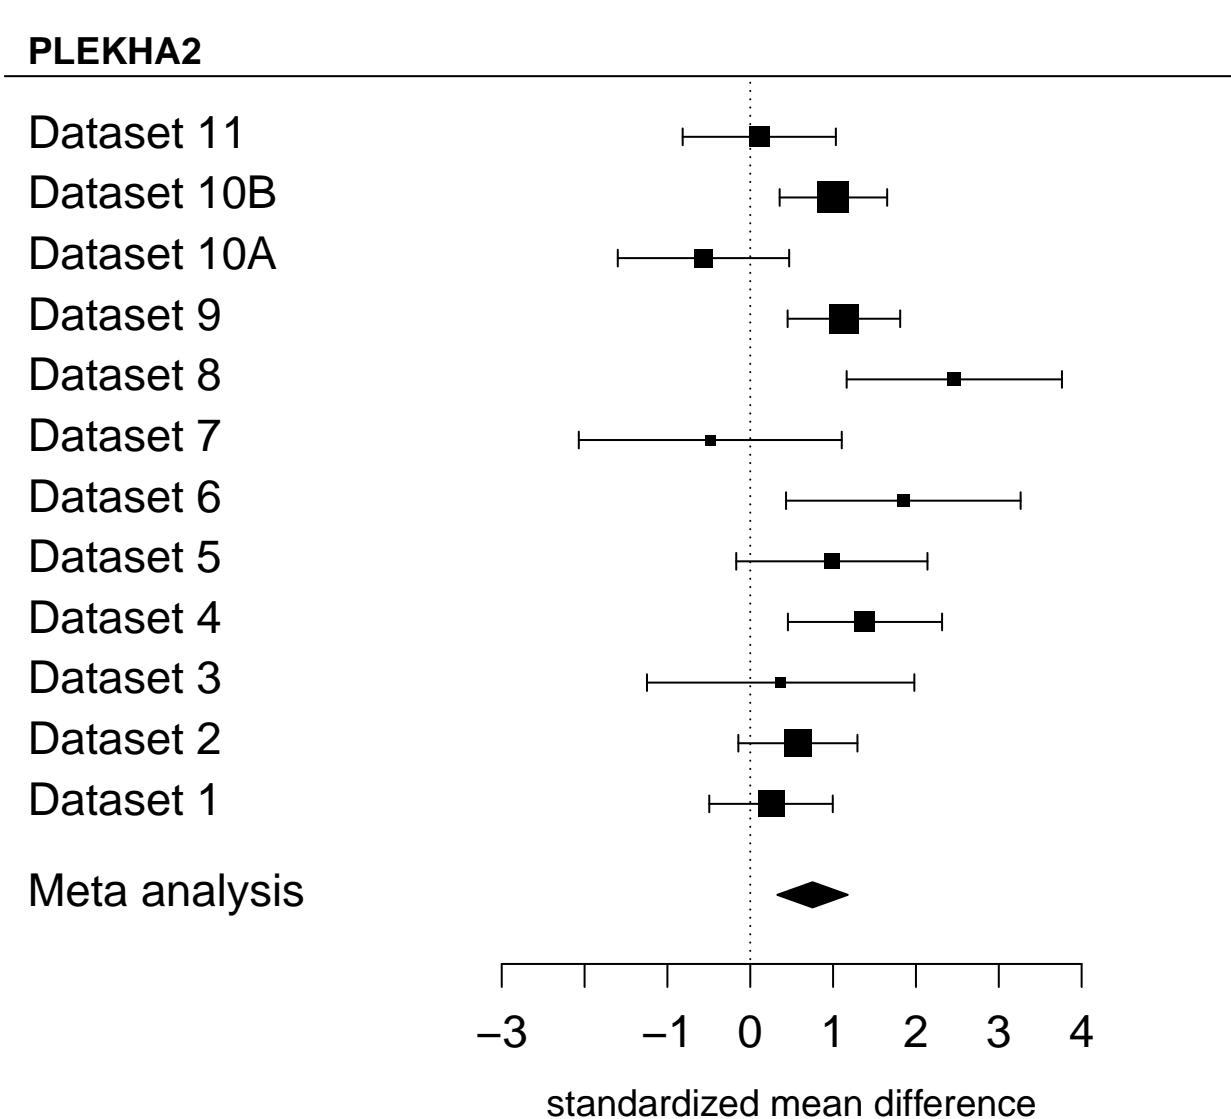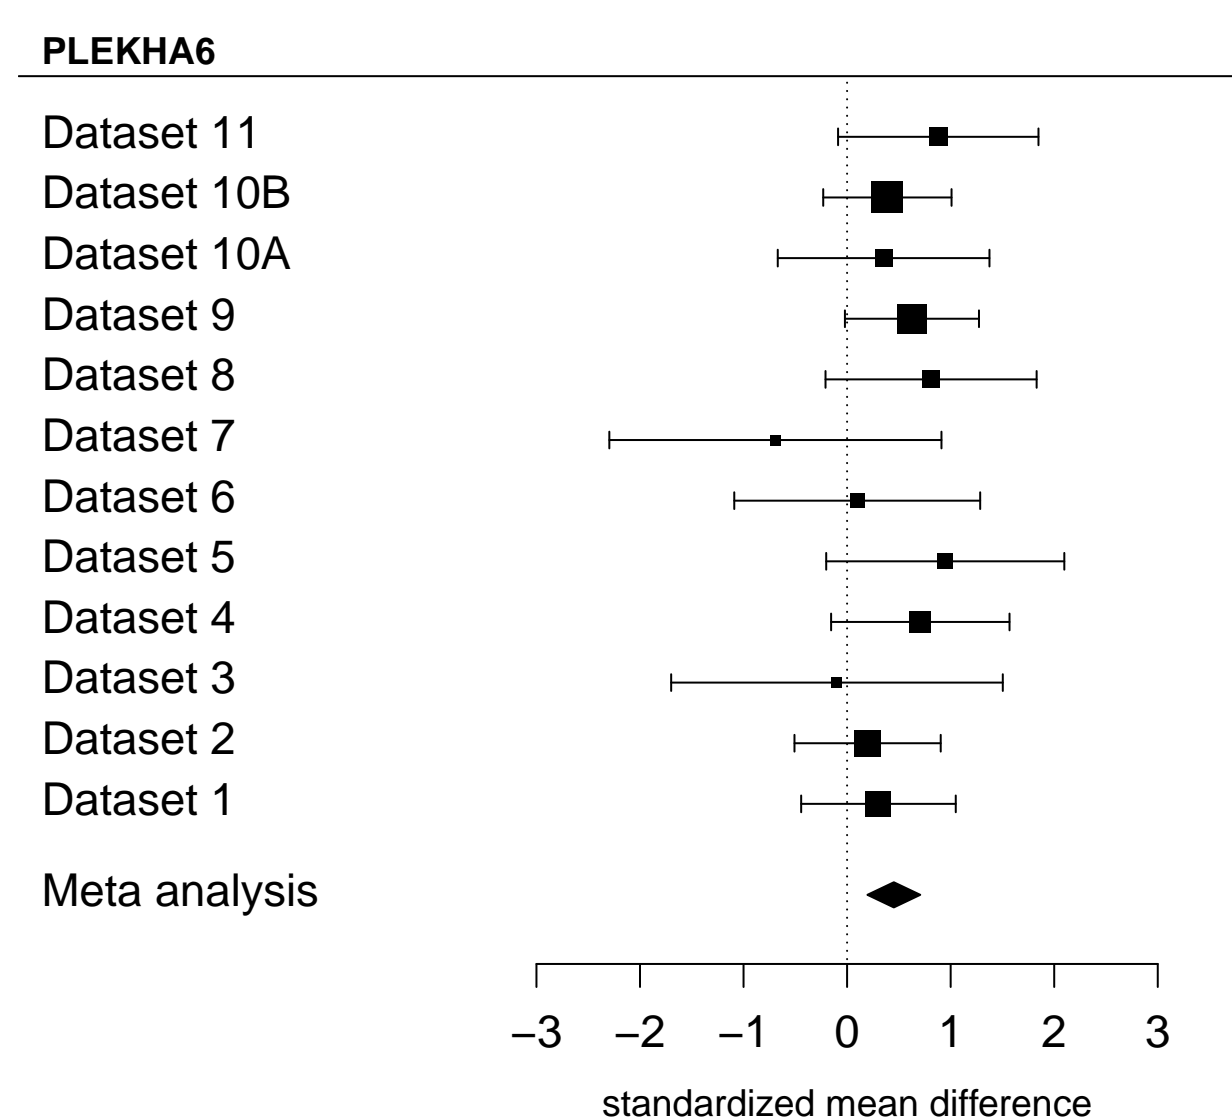



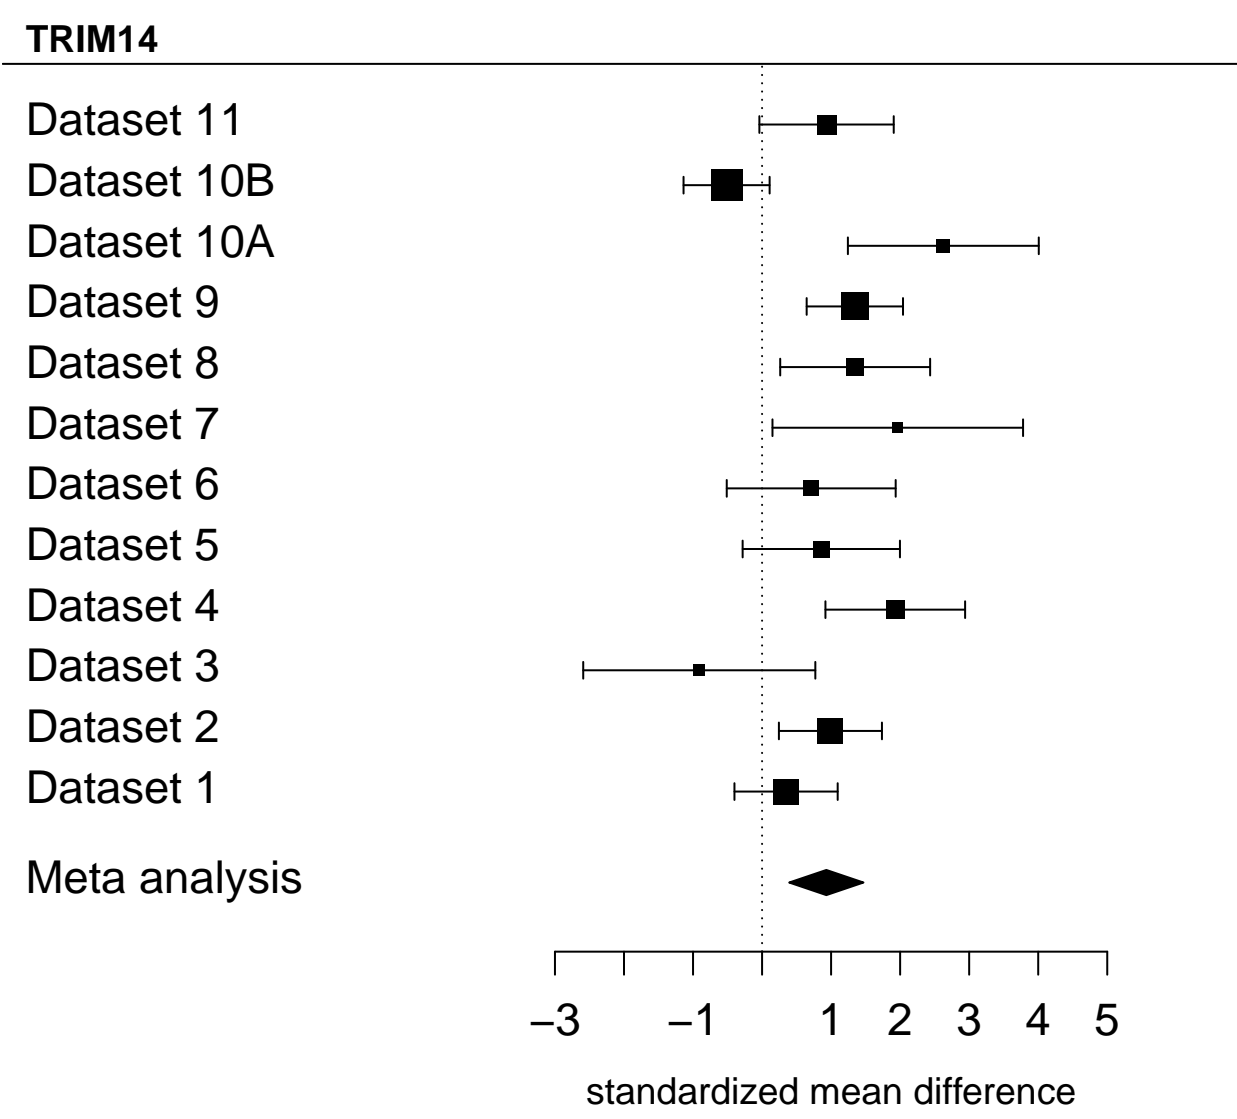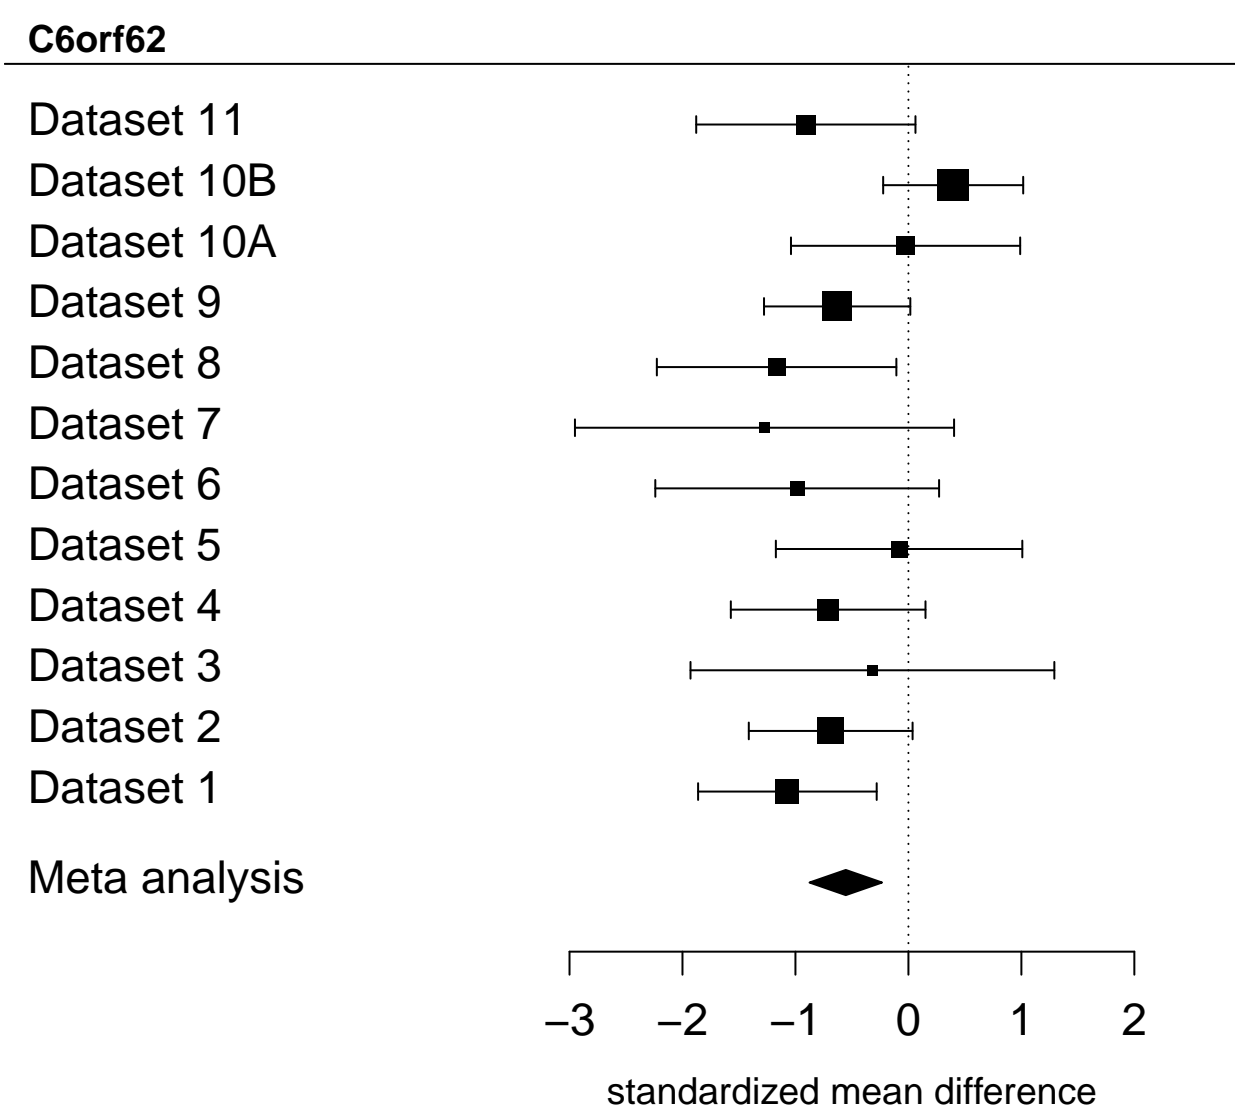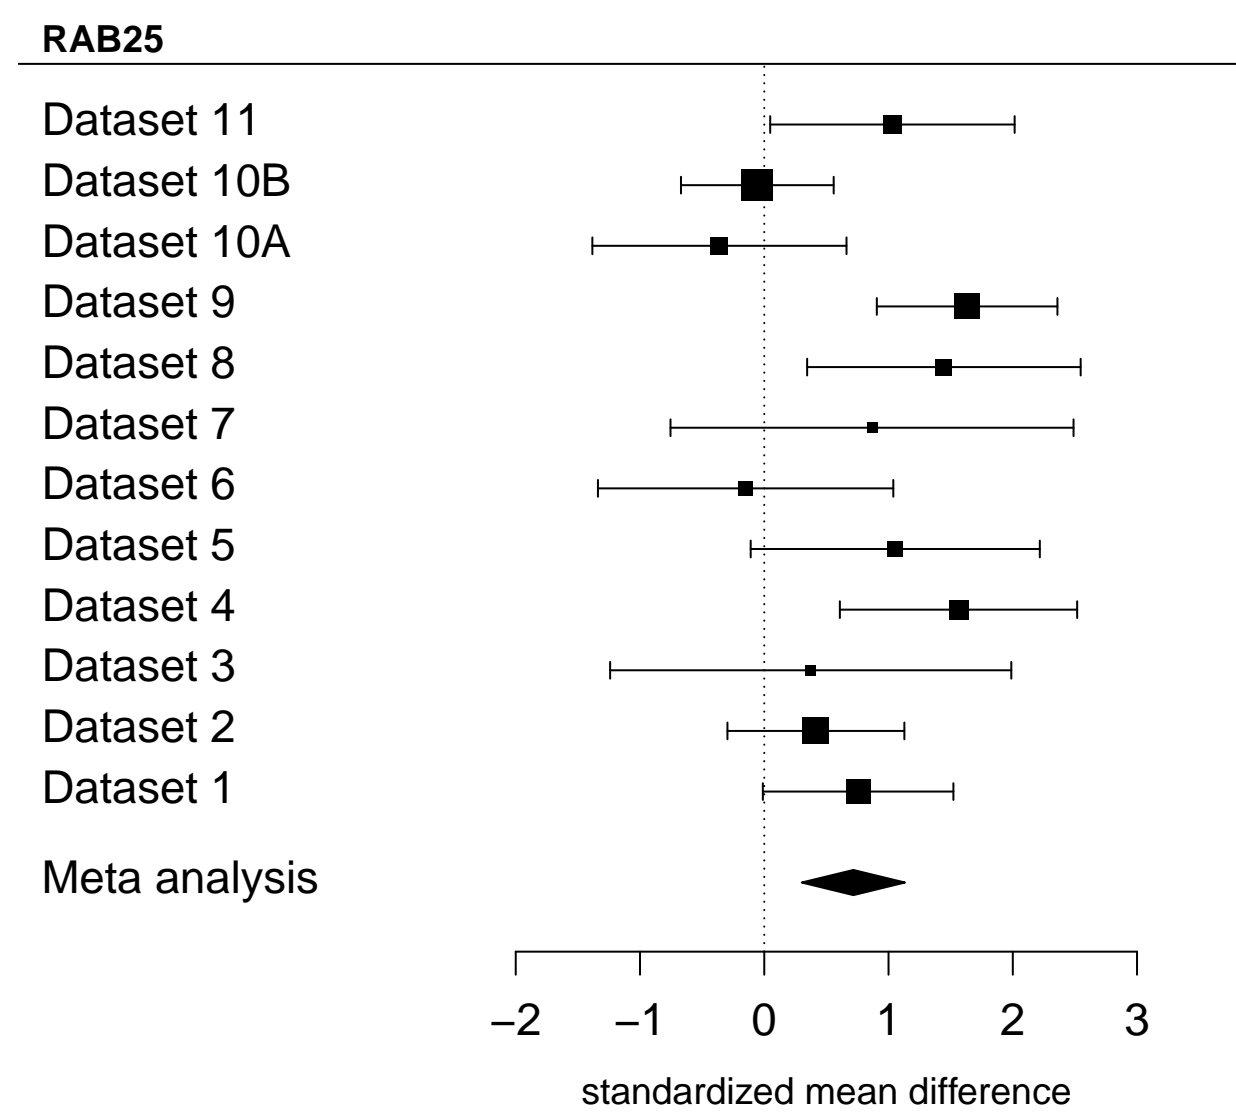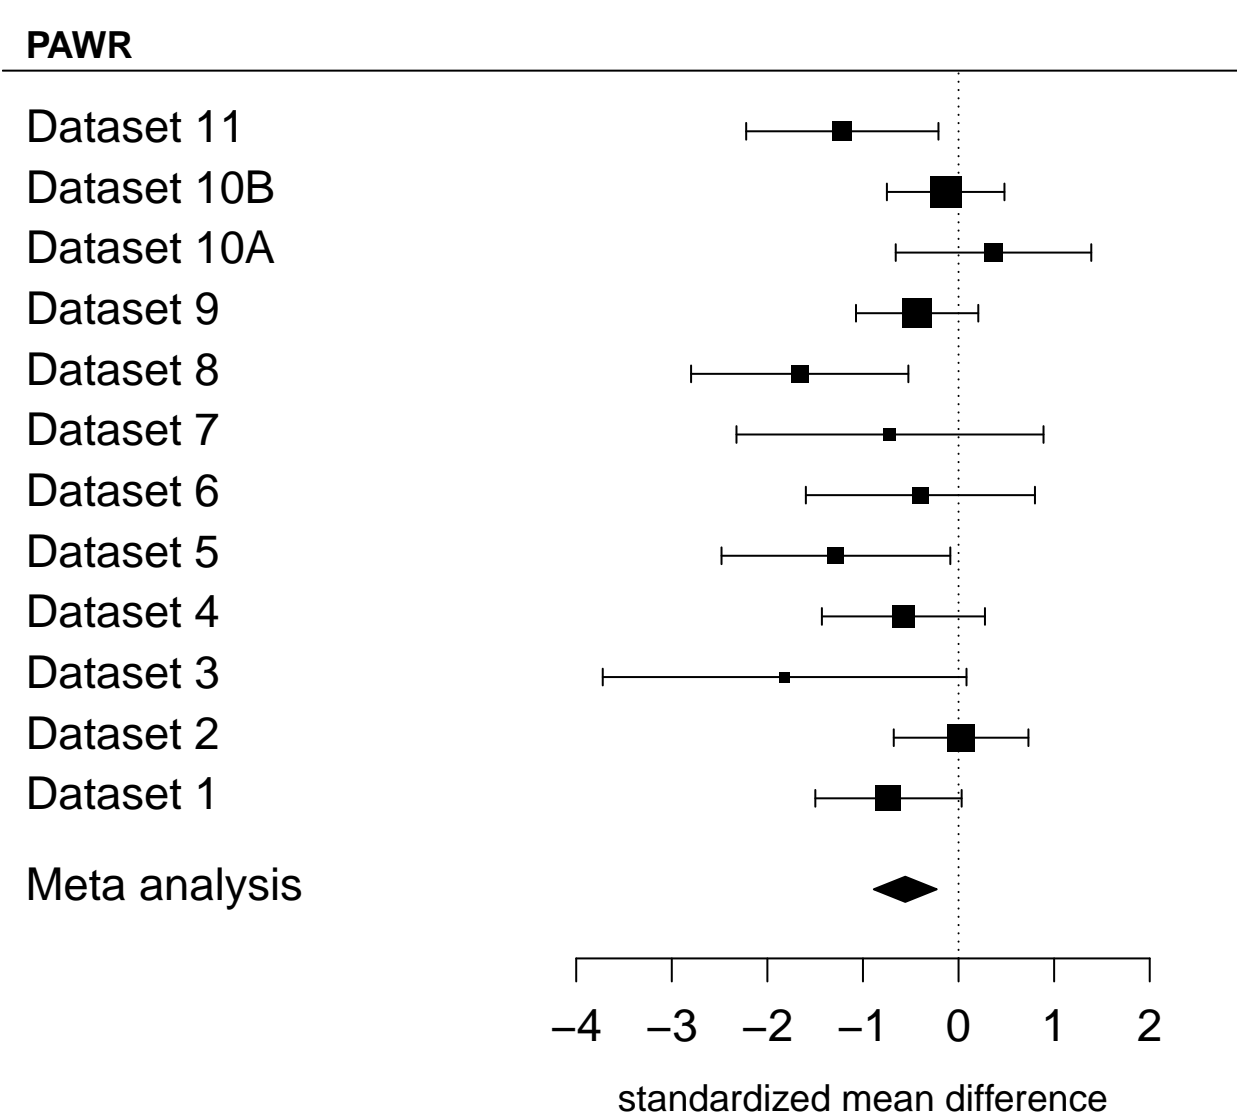

**S1 Figure. Forest plots of meta-signature genes.**

Forest plots of the 388 differentially expressed genes in the preeclamptic placenta. Squares are proportional to weights used in the meta-analysis, and the lines represent the 95% confidence interval. The diamond represents the standardized mean difference (log2 scale).
